# Supplementary material for: Breast Cancer Clinical Trial of Chemotherapy and Trastuzumab: Potential Tool to Identify Cardiac Modifying Variants of Dilated Cardiomyopathy
Source: MDPI journal article supplement (doi:10.3390/jcdd4020006), 2017-05-04
Supplement: s1 [file s1]

**Supplementary Figure 1: N9831 PCA plot, Arms A, B and C GWAS data.**

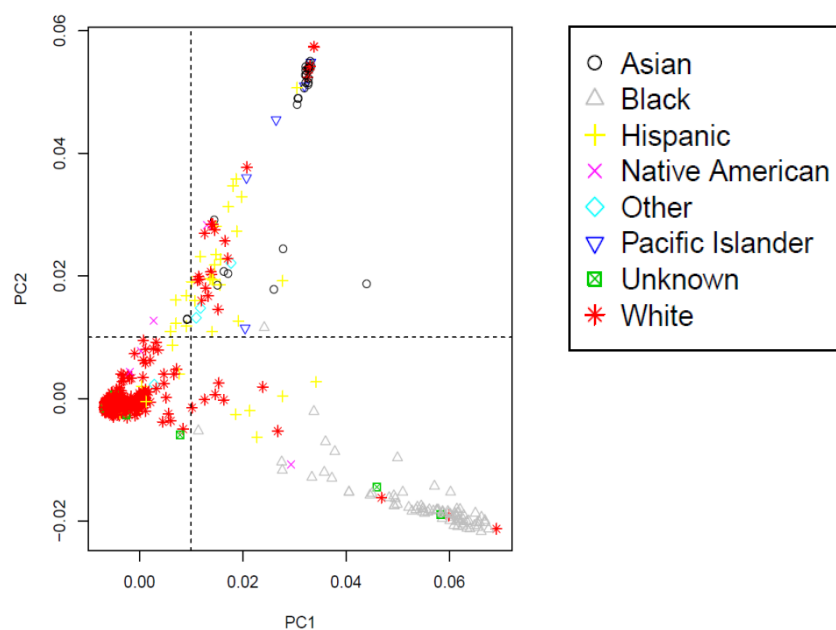

**Supplementary Figure 1 Legend:** The first and second principal components separate patients based on race. Self-reported non-Caucasians were excluded, as were Caucasians outside of their expected cluster (lower left quadrant).
