# Supplementary material for: Breast Cancer Clinical Trial of Chemotherapy and Trastuzumab: Potential Tool to Identify Cardiac Modifying Variants of Dilated Cardiomyopathy
Source: MDPI journal article supplement (doi:10.3390/jcdd4020006), 2017-05-04
Supplement: s1 [file s1]

| gene  | dbSNP.RS.ID | hg19 coordinates            | SNP          |
|-------|-------------|-----------------------------|--------------|
| ABCC9 | rs17630922  | chr12:21,950,324-22,094,336 | AX-11332151  |
| ABCC9 | ---         | chr12:21,950,324-22,094,336 | AX-90043439  |
| ABCC9 | rs829060    | chr12:21,950,324-22,094,336 | AX-16901287  |
| ABCC9 | rs10841895  | chr12:21,950,324-22,094,336 | AX-122744505 |
| ABCC9 | rs10841895  | chr12:21,950,324-22,094,336 | AX-148499213 |
| ABCC9 | rs829061    | chr12:21,950,324-22,094,336 | AX-148316894 |
| ABCC9 | rs829061    | chr12:21,950,324-22,094,336 | AX-156270652 |
| ABCC9 | rs7966926   | chr12:21,950,324-22,094,336 | AX-30632217  |
| ABCC9 | rs113591229 | chr12:21,950,324-22,094,336 | AX-148920908 |
| ABCC9 | rs113591229 | chr12:21,950,324-22,094,336 | AX-156283775 |
| ABCC9 | rs7956490   | chr12:21,950,324-22,094,336 | AX-39362191  |
| ABCC9 | rs4148679   | chr12:21,950,324-22,094,336 | AX-16901305  |
| ABCC9 | rs540590379 | chr12:21,950,324-22,094,336 | AX-156285425 |
| ABCC9 | rs113117014 | chr12:21,950,324-22,094,336 | AX-148784013 |
| ABCC9 | rs113117014 | chr12:21,950,324-22,094,336 | AX-156270653 |
| ABCC9 | rs9668454   | chr12:21,950,324-22,094,336 | AX-12666550  |
| ABCC9 | rs2638441   | chr12:21,950,324-22,094,336 | AX-16901313  |
| ABCC9 | rs199804188 | chr12:21,950,324-22,094,336 | AX-156285841 |
| ABCC9 | rs28459490  | chr12:21,950,324-22,094,336 | AX-148732246 |
| ABCC9 | rs7309274   | chr12:21,950,324-22,094,336 | AX-16901320  |
| ABCC9 | rs4148678   | chr12:21,950,324-22,094,336 | AX-113409058 |
| ABCC9 | rs4148678   | chr12:21,950,324-22,094,336 | AX-113965543 |
| ABCC9 | rs16924332  | chr12:21,950,324-22,094,336 | AX-11290180  |
| ABCC9 | rs7136997   | chr12:21,950,324-22,094,336 | AX-113006537 |
| ABCC9 | rs7136997   | chr12:21,950,324-22,094,336 | AX-113415296 |
| ABCC9 | rs2726120   | chr12:21,950,324-22,094,336 | AX-16901336  |
| ABCC9 | rs111696716 | chr12:21,950,324-22,094,336 | AX-119373074 |
| ABCC9 | rs111696716 | chr12:21,950,324-22,094,336 | AX-151334701 |
| ABCC9 | rs4148677   | chr12:21,950,324-22,094,336 | AX-11496310  |
| ABCC9 | rs829074    | chr12:21,950,324-22,094,336 | AX-16901341  |
| ABCC9 | rs56178300  | chr12:21,950,324-22,094,336 | AX-123090341 |
| ABCC9 | rs829075    | chr12:21,950,324-22,094,336 | AX-148924082 |
| ABCC9 | rs829075    | chr12:21,950,324-22,094,336 | AX-156266224 |
| ABCC9 | rs2161062   | chr12:21,950,324-22,094,336 | AX-156266225 |
| ABCC9 | rs1873638   | chr12:21,950,324-22,094,336 | AX-16901344  |
| ABCC9 | rs73070690  | chr12:21,950,324-22,094,336 | AX-30632299  |
| ABCC9 | rs17631144  | chr12:21,950,324-22,094,336 | AX-11332166  |
| ABCC9 | rs1283809   | chr12:21,950,324-22,094,336 | AX-11228808  |
| ABCC9 | rs1283810   | chr12:21,950,324-22,094,336 | AX-12447798  |
| ABCC9 | rs1283811   | chr12:21,950,324-22,094,336 | AX-11228809  |
| ABCC9 | rs146942382 | chr12:21,950,324-22,094,336 | AX-83012390  |
| ABCC9 | rs1283812   | chr12:21,950,324-22,094,336 | AX-88317235  |
| ABCC9 | rs61928479  | chr12:21,950,324-22,094,336 | AX-121177167 |
| ABCC9 | rs11046202  | chr12:21,950,324-22,094,336 | AX-11139910  |
| ABCC9 | rs2112080   | chr12:21,950,324-22,094,336 | AX-16901354  |
| ABCC9 | rs1283815   | chr12:21,950,324-22,094,336 | AX-119467012 |
| ABCC9 | rs1283815   | chr12:21,950,324-22,094,336 | AX-123026069 |
| ABCC9 | rs1283816   | chr12:21,950,324-22,094,336 | AX-12447801  |
| ABCC9 | rs1283817   | chr12:21,950,324-22,094,336 | AX-16901361  |
| ABCC9 | rs3782667   | chr12:21,950,324-22,094,336 | AX-16901364  |
| ABCC9 | rs11046203  | chr12:21,950,324-22,094,336 | AX-39362239  |
| ABCC9 | rs1967534   | chr12:21,950,324-22,094,336 | AX-11356552  |
| ABCC9 | rs1517284   | chr12:21,950,324-22,094,336 | AX-16901377  |
| ABCC9 | rs7974190   | chr12:21,950,324-22,094,336 | AX-16901380  |

|       |             |                             |              |
|-------|-------------|-----------------------------|--------------|
| ABCC9 | rs829068    | chr12:21,950,324-22,094,336 | AX-16901381  |
| ABCC9 | rs829069    | chr12:21,950,324-22,094,336 | AX-16901383  |
| ABCC9 | rs2098574   | chr12:21,950,324-22,094,336 | AX-11367169  |
| ABCC9 | rs864360    | chr12:21,950,324-22,094,336 | AX-16901386  |
| ABCC9 | rs1299731   | chr12:21,950,324-22,094,336 | AX-112926248 |
| ABCC9 | rs34811342  | chr12:21,950,324-22,094,336 | AX-151118150 |
| ABCC9 | rs704175    | chr12:21,950,324-22,094,336 | AX-11603324  |
| ABCC9 | rs12825295  | chr12:21,950,324-22,094,336 | AX-148260452 |
| ABCC9 | rs12825295  | chr12:21,950,324-22,094,336 | AX-156270654 |
| ABCC9 | rs704176    | chr12:21,950,324-22,094,336 | AX-39362253  |
| ABCC9 | rs12369421  | chr12:21,950,324-22,094,336 | AX-16901406  |
| ABCC9 | rs11046205  | chr12:21,950,324-22,094,336 | AX-96077695  |
| ABCC9 | rs11046205  | chr12:21,950,324-22,094,336 | AX-96097798  |
| ABCC9 | rs67543549  | chr12:21,950,324-22,094,336 | AX-30632441  |
| ABCC9 | rs704177    | chr12:21,950,324-22,094,336 | AX-16901417  |
| ABCC9 | rs704178    | chr12:21,950,324-22,094,336 | AX-16901418  |
| ABCC9 | rs704179    | chr12:21,950,324-22,094,336 | AX-11603328  |
| ABCC9 | rs704180    | chr12:21,950,324-22,094,336 | AX-39362259  |
| ABCC9 | rs829072    | chr12:21,950,324-22,094,336 | AX-156283776 |
| ABCC9 | rs861202    | chr12:21,950,324-22,094,336 | AX-156289418 |
| ABCC9 | rs1643235   | chr12:21,950,324-22,094,336 | AX-16901428  |
| ABCC9 | rs11836934  | chr12:21,950,324-22,094,336 | AX-50783510  |
| ABCC9 | rs55849264  | chr12:21,950,324-22,094,336 | AX-16901441  |
| ABCC9 | ---         | chr12:21,950,324-22,094,336 | AX-151121197 |
| ABCC9 | rs829079    | chr12:21,950,324-22,094,336 | AX-11668469  |
| ABCC9 | rs829080    | chr12:21,950,324-22,094,336 | AX-11668470  |
| ABCC9 | rs138878517 | chr12:21,950,324-22,094,336 | AX-122466762 |
| ABCC9 | rs143553602 | chr12:21,950,324-22,094,336 | AX-156285692 |
| ABCC9 | rs1283822   | chr12:21,950,324-22,094,336 | AX-16901460  |
| ABCC9 | rs704182    | chr12:21,950,324-22,094,336 | AX-113000328 |
| ABCC9 | rs704182    | chr12:21,950,324-22,094,336 | AX-113409062 |
| ABCC9 | rs4148674   | chr12:21,950,324-22,094,336 | AX-16901465  |
| ABCC9 | rs4148673   | chr12:21,950,324-22,094,336 | AX-11496308  |
| ABCC9 | rs7966849   | chr12:21,950,324-22,094,336 | AX-16901470  |
| ABCC9 | rs7966768   | chr12:21,950,324-22,094,336 | AX-11656727  |
| ABCC9 | rs4148672   | chr12:21,950,324-22,094,336 | AX-107753769 |
| ABCC9 | rs4148672   | chr12:21,950,324-22,094,336 | AX-156289419 |
| ABCC9 | rs2307024   | chr12:21,950,324-22,094,336 | AX-16901472  |
| ABCC9 | ---         | chr12:21,950,324-22,094,336 | AX-86727263  |
| ABCC9 | rs4296081   | chr12:21,950,324-22,094,336 | AX-156270656 |
| ABCC9 | rs11046212  | chr12:21,950,324-22,094,336 | AX-112926250 |
| ABCC9 | rs11046212  | chr12:21,950,324-22,094,336 | AX-113482901 |
| ABCC9 | rs704185    | chr12:21,950,324-22,094,336 | AX-16901473  |
| ABCC9 | ---         | chr12:21,950,324-22,094,336 | AX-39362331  |
| ABCC9 | rs11046213  | chr12:21,950,324-22,094,336 | AX-16901476  |
| ABCC9 | rs75649931  | chr12:21,950,324-22,094,336 | AX-16901477  |
| ABCC9 | rs2161063   | chr12:21,950,324-22,094,336 | AX-16901479  |
| ABCC9 | rs76857194  | chr12:21,950,324-22,094,336 | AX-30632595  |
| ABCC9 | rs73254540  | chr12:21,950,324-22,094,336 | AX-16901484  |
| ABCC9 | rs11046215  | chr12:21,950,324-22,094,336 | AX-12405181  |
| ABCC9 | rs10841900  | chr12:21,950,324-22,094,336 | AX-16901489  |
| ABCC9 | rs704187    | chr12:21,950,324-22,094,336 | AX-16901492  |
| ABCC9 | rs704189    | chr12:21,950,324-22,094,336 | AX-11603336  |
| ABCC9 | rs12230539  | chr12:21,950,324-22,094,336 | AX-112926379 |
| ABCC9 | rs12230539  | chr12:21,950,324-22,094,336 | AX-113000417 |

|       |             |                             |              |
|-------|-------------|-----------------------------|--------------|
| ABCC9 | rs11835804  | chr12:21,950,324-22,094,336 | AX-113417350 |
| ABCC9 | rs11835804  | chr12:21,950,324-22,094,336 | AX-113491400 |
| ABCC9 | rs1972613   | chr12:21,950,324-22,094,336 | AX-115138575 |
| ABCC9 | rs1972613   | chr12:21,950,324-22,094,336 | AX-148187130 |
| ABCC9 | rs704190    | chr12:21,950,324-22,094,336 | AX-16901499  |
| ABCC9 | rs704191    | chr12:21,950,324-22,094,336 | AX-16901503  |
| ABCC9 | rs704192    | chr12:21,950,324-22,094,336 | AX-16901504  |
| ABCC9 | rs137881774 | chr12:21,950,324-22,094,336 | AX-30632637  |
| ABCC9 | rs704193    | chr12:21,950,324-22,094,336 | AX-11603341  |
| ABCC9 | rs141281214 | chr12:21,950,324-22,094,336 | AX-86597744  |
| ABCC9 | rs704194    | chr12:21,950,324-22,094,336 | AX-112926251 |
| ABCC9 | rs704194    | chr12:21,950,324-22,094,336 | AX-113965545 |
| ABCC9 | rs697252    | chr12:21,950,324-22,094,336 | AX-12616117  |
| ABCC9 | ---         | chr12:21,950,324-22,094,336 | AX-151121898 |
| ABCC9 | ---         | chr12:21,950,324-22,094,336 | AX-156286326 |
| ABCC9 | rs71444142  | chr12:21,950,324-22,094,336 | AX-107728867 |
| ABCC9 | rs71444142  | chr12:21,950,324-22,094,336 | AX-156298635 |
| ABCC9 | rs3782668   | chr12:21,950,324-22,094,336 | AX-16901532  |
| ABCC9 | rs1283798   | chr12:21,950,324-22,094,336 | AX-16901535  |
| ABCC9 | rs1965033   | chr12:21,950,324-22,094,336 | AX-148242915 |
| ABCC9 | rs1965033   | chr12:21,950,324-22,094,336 | AX-156270657 |
| ABCC9 | rs7958833   | chr12:21,950,324-22,094,336 | AX-121101825 |
| ABCC9 | rs7958833   | chr12:21,950,324-22,094,336 | AX-156279932 |
| ABCC9 | rs10841902  | chr12:21,950,324-22,094,336 | AX-16901541  |
| ABCC9 | rs71053351  | chr12:21,950,324-22,094,336 | AX-151213342 |
| ABCC9 | rs4148669   | chr12:21,950,324-22,094,336 | AX-16901542  |
| ABCC9 | rs1492137   | chr12:21,950,324-22,094,336 | AX-11268601  |
| ABCC9 | rs10841904  | chr12:21,950,324-22,094,336 | AX-113925008 |
| ABCC9 | rs74503836  | chr12:21,950,324-22,094,336 | AX-30632721  |
| ABCC9 | rs10841905  | chr12:21,950,324-22,094,336 | AX-113442455 |
| ABCC9 | rs10841905  | chr12:21,950,324-22,094,336 | AX-113516673 |
| ABCC9 | rs10841906  | chr12:21,950,324-22,094,336 | AX-113033946 |
| ABCC9 | rs10841906  | chr12:21,950,324-22,094,336 | AX-113442460 |
| ABCC9 | rs139991988 | chr12:21,950,324-22,094,336 | AX-120579410 |
| ABCC9 | rs148174226 | chr12:21,950,324-22,094,336 | AX-83250493  |
| ABCC9 | rs704205    | chr12:21,950,324-22,094,336 | AX-11603351  |
| ABCC9 | ---         | chr12:21,950,324-22,094,336 | AX-16901563  |
| ABCC9 | rs4148668   | chr12:21,950,324-22,094,336 | AX-16901567  |
| ABCC9 | rs4148667   | chr12:21,950,324-22,094,336 | AX-39362443  |
| ABCC9 | rs4148666   | chr12:21,950,324-22,094,336 | AX-11496307  |
| ABCC9 | rs35711602  | chr12:21,950,324-22,094,336 | AX-16901572  |
| ABCC9 | rs12304313  | chr12:21,950,324-22,094,336 | AX-12432886  |
| ABCC9 | rs11836595  | chr12:21,950,324-22,094,336 | AX-112931159 |
| ABCC9 | rs11836595  | chr12:21,950,324-22,094,336 | AX-113487886 |
| ABCC9 | rs74067832  | chr12:21,950,324-22,094,336 | AX-16901573  |
| ABCC9 | rs74067833  | chr12:21,950,324-22,094,336 | AX-16901574  |
| ABCC9 | rs77923631  | chr12:21,950,324-22,094,336 | AX-16901583  |
| ABCC9 | rs77360959  | chr12:21,950,324-22,094,336 | AX-16901584  |
| ABCC9 | rs7301876   | chr12:21,950,324-22,094,336 | AX-113409064 |
| ABCC9 | rs7301876   | chr12:21,950,324-22,094,336 | AX-113965547 |
| ABCC9 | rs1356369   | chr12:21,950,324-22,094,336 | AX-12459438  |
| ABCC9 | rs79757822  | chr12:21,950,324-22,094,336 | AX-16901585  |
| ABCC9 | rs4148665   | chr12:21,950,324-22,094,336 | AX-16901589  |
| ABCC9 | rs4148664   | chr12:21,950,324-22,094,336 | AX-11496305  |
| ABCC9 | rs1356368   | chr12:21,950,324-22,094,336 | AX-39362475  |

|       |             |                             |              |
|-------|-------------|-----------------------------|--------------|
| ABCC9 | rs1283802   | chr12:21,950,324-22,094,336 | AX-11228807  |
| ABCC9 | rs1388698   | chr12:21,950,324-22,094,336 | AX-113409065 |
| ABCC9 | rs1283808   | chr12:21,950,324-22,094,336 | AX-112959838 |
| ABCC9 | rs1283808   | chr12:21,950,324-22,094,336 | AX-92777905  |
| ABCC9 | rs77026371  | chr12:21,950,324-22,094,336 | AX-148700748 |
| ABCC9 | rs77026371  | chr12:21,950,324-22,094,336 | AX-156270658 |
| ABCC9 | rs7314764   | chr12:21,950,324-22,094,336 | AX-16901596  |
| ABCC9 | rs704206    | chr12:21,950,324-22,094,336 | AX-16901598  |
| ABCC9 | rs7137730   | chr12:21,950,324-22,094,336 | AX-16901599  |
| ABCC9 | rs7308718   | chr12:21,950,324-22,094,336 | AX-16901601  |
| ABCC9 | rs7138546   | chr12:21,950,324-22,094,336 | AX-16901602  |
| ABCC9 | rs1352909   | chr12:21,950,324-22,094,336 | AX-113891689 |
| ABCC9 | rs1352909   | chr12:21,950,324-22,094,336 | AX-113965549 |
| ABCC9 | rs5796929   | chr12:21,950,324-22,094,336 | AX-151269049 |
| ABCC9 | rs150036969 | chr12:21,950,324-22,094,336 | AX-83242746  |
| ABCC9 | rs61001398  | chr12:21,950,324-22,094,336 | AX-16901608  |
| ABCC9 | rs201087758 | chr12:21,950,324-22,094,336 | AX-156286034 |
| ABCC9 | rs704208    | chr12:21,950,324-22,094,336 | AX-16901614  |
| ABCC9 | rs71444143  | chr12:21,950,324-22,094,336 | AX-107769538 |
| ABCC9 | rs71444143  | chr12:21,950,324-22,094,336 | AX-156298481 |
| ABCC9 | rs4762717   | chr12:21,950,324-22,094,336 | AX-16901619  |
| ABCC9 | rs704209    | chr12:21,950,324-22,094,336 | AX-16901620  |
| ABCC9 | rs2131136   | chr12:21,950,324-22,094,336 | AX-12518246  |
| ABCC9 | rs1283807   | chr12:21,950,324-22,094,336 | AX-12447797  |
| ABCC9 | rs704210    | chr12:21,950,324-22,094,336 | AX-113094257 |
| ABCC9 | rs704210    | chr12:21,950,324-22,094,336 | AX-123026070 |
| ABCC9 | rs704211    | chr12:21,950,324-22,094,336 | AX-156270659 |
| ABCC9 | ---         | chr12:21,950,324-22,094,336 | AX-122289052 |
| ABCC9 | ---         | chr12:21,950,324-22,094,336 | AX-148725230 |
| ABCC9 | rs2032775   | chr12:21,950,324-22,094,336 | AX-12514555  |
| ABCC9 | rs704212    | chr12:21,950,324-22,094,336 | AX-12618816  |
| ABCC9 | rs4148661   | chr12:21,950,324-22,094,336 | AX-16901628  |
| ABCC9 | rs2292772   | chr12:21,950,324-22,094,336 | AX-16901631  |
| ABCC9 | rs2292771   | chr12:21,950,324-22,094,336 | AX-16901632  |
| ABCC9 | rs1914361   | chr12:21,950,324-22,094,336 | AX-16901633  |
| ABCC9 | rs704215    | chr12:21,950,324-22,094,336 | AX-16901634  |
| ABCC9 | rs704217    | chr12:21,950,324-22,094,336 | AX-16901637  |
| ABCC9 | rs7978092   | chr12:21,950,324-22,094,336 | AX-11657531  |
| ABCC9 | rs74067850  | chr12:21,950,324-22,094,336 | AX-16901644  |
| ABCC9 | rs72211208  | chr12:21,950,324-22,094,336 | AX-156284770 |
| ABCC9 | rs72211208  | chr12:21,950,324-22,094,336 | AX-97256391  |
| ABCC9 | rs113142980 | chr12:21,950,324-22,094,336 | AX-148911748 |
| ABCC9 | rs113142980 | chr12:21,950,324-22,094,336 | AX-156270660 |
| ABCC9 | rs59061211  | chr12:21,950,324-22,094,336 | AX-156270661 |
| ABCC9 | rs1283806   | chr12:21,950,324-22,094,336 | AX-113403892 |
| ABCC9 | rs1283806   | chr12:21,950,324-22,094,336 | AX-113477785 |
| ABCC9 | rs1283805   | chr12:21,950,324-22,094,336 | AX-113403893 |
| ABCC9 | rs1283805   | chr12:21,950,324-22,094,336 | AX-113960497 |
| ABCC9 | rs1283804   | chr12:21,950,324-22,094,336 | AX-113886627 |
| ABCC9 | rs1283804   | chr12:21,950,324-22,094,336 | AX-113960498 |
| ABCC9 | rs10743426  | chr12:21,950,324-22,094,336 | AX-113409069 |
| ABCC9 | rs10743426  | chr12:21,950,324-22,094,336 | AX-113965552 |
| ABCC9 | rs10841907  | chr12:21,950,324-22,094,336 | AX-95859985  |
| ABCC9 | rs34243384  | chr12:21,950,324-22,094,336 | AX-16901662  |
| ABCC9 | rs11046224  | chr12:21,950,324-22,094,336 | AX-113068328 |

|       |             |                             |              |
|-------|-------------|-----------------------------|--------------|
| ABCC9 | rs11046224  | chr12:21,950,324-22,094,336 | AX-148204580 |
| ABCC9 | rs148096888 | chr12:21,950,324-22,094,336 | AX-148902887 |
| ABCC9 | rs148096888 | chr12:21,950,324-22,094,336 | AX-156283777 |
| ABCC9 | rs10770862  | chr12:21,950,324-22,094,336 | AX-112998313 |
| ABCC9 | rs10770862  | chr12:21,950,324-22,094,336 | AX-113889747 |
| ABCC9 | rs138809747 | chr12:21,950,324-22,094,336 | AX-148902888 |
| ABCC9 | rs138809747 | chr12:21,950,324-22,094,336 | AX-156297638 |
| ABCC9 | rs146375843 | chr12:21,950,324-22,094,336 | AX-151337532 |
| ABCC9 | rs146375843 | chr12:21,950,324-22,094,336 | AX-151460409 |
| ABCC9 | rs61921496  | chr12:21,950,324-22,094,336 | AX-148205342 |
| ABCC9 | rs61921496  | chr12:21,950,324-22,094,336 | AX-156283778 |
| ABCC9 | rs11046226  | chr12:21,950,324-22,094,336 | AX-151188210 |
| ABCC9 | rs11046226  | chr12:21,950,324-22,094,336 | AX-151250351 |
| ABCC9 | rs11046227  | chr12:21,950,324-22,094,336 | AX-105135049 |
| ABCC9 | rs11046227  | chr12:21,950,324-22,094,336 | AX-148203408 |
| ABCC9 | rs140731339 | chr12:21,950,324-22,094,336 | AX-121668767 |
| ABCC9 | rs140731339 | chr12:21,950,324-22,094,336 | AX-151189940 |
| ABCC9 | rs10770863  | chr12:21,950,324-22,094,336 | AX-112959849 |
| ABCC9 | rs10770863  | chr12:21,950,324-22,094,336 | AX-113999019 |
| ABCC9 | rs149126386 | chr12:21,950,324-22,094,336 | AX-148904725 |
| ABCC9 | rs149126386 | chr12:21,950,324-22,094,336 | AX-156283779 |
| ABCC9 | rs11046228  | chr12:21,950,324-22,094,336 | AX-112998314 |
| ABCC9 | rs11046228  | chr12:21,950,324-22,094,336 | AX-113889748 |
| ABCC9 | rs10841908  | chr12:21,950,324-22,094,336 | AX-105168000 |
| ABCC9 | rs143789188 | chr12:21,950,324-22,094,336 | AX-148587974 |
| ABCC9 | rs143789188 | chr12:21,950,324-22,094,336 | AX-156283780 |
| ABCC9 | rs189137911 | chr12:21,950,324-22,094,336 | AX-112076761 |
| ABCC9 | rs189137911 | chr12:21,950,324-22,094,336 | AX-148559092 |
| ABCC9 | rs10841910  | chr12:21,950,324-22,094,336 | AX-113889749 |
| ABCC9 | rs10841910  | chr12:21,950,324-22,094,336 | AX-97567512  |
| ABCC9 | rs2193881   | chr12:21,950,324-22,094,336 | AX-114345411 |
| ABCC9 | rs2193881   | chr12:21,950,324-22,094,336 | AX-156289422 |
| ABCC9 | rs11046229  | chr12:21,950,324-22,094,336 | AX-120130312 |
| ABCC9 | rs11046229  | chr12:21,950,324-22,094,336 | AX-148216452 |
| ABCC9 | rs7972391   | chr12:21,950,324-22,094,336 | AX-148118548 |
| ABCC9 | rs7972391   | chr12:21,950,324-22,094,336 | AX-149014133 |
| ABCC9 | rs140413681 | chr12:21,950,324-22,094,336 | AX-148068669 |
| ABCC9 | rs140413681 | chr12:21,950,324-22,094,336 | AX-156283781 |
| ABCC9 | rs4148660   | chr12:21,950,324-22,094,336 | AX-16901678  |
| ABCC9 | rs11046230  | chr12:21,950,324-22,094,336 | AX-16901679  |
| ABCC9 | rs1421602   | chr12:21,950,324-22,094,336 | AX-16901682  |
| ABCC9 | rs75280226  | chr12:21,950,324-22,094,336 | AX-16901683  |
| ABCC9 | rs4148657   | chr12:21,950,324-22,094,336 | AX-16901686  |
| ABCC9 | rs139620148 | chr12:21,950,324-22,094,336 | AX-86575108  |
| ABCC9 | rs10770865  | chr12:21,950,324-22,094,336 | AX-16901688  |
| ABCC9 | rs4148656   | chr12:21,950,324-22,094,336 | AX-113409070 |
| ABCC9 | rs4148656   | chr12:21,950,324-22,094,336 | AX-113965553 |
| ABCC9 | rs4148655   | chr12:21,950,324-22,094,336 | AX-113965554 |
| ABCC9 | rs72559752  | chr12:21,950,324-22,094,336 | AX-16901692  |
| ABCC9 | rs4148654   | chr12:21,950,324-22,094,336 | AX-16901693  |
| ABCC9 | rs2418021   | chr12:21,950,324-22,094,336 | AX-11390821  |
| ABCC9 | rs12366938  | chr12:21,950,324-22,094,336 | AX-16901695  |
| ABCC9 | ---         | chr12:21,950,324-22,094,336 | AX-90043125  |
| ABCC9 | rs1517276   | chr12:21,950,324-22,094,336 | AX-16901701  |
| ABCC9 | rs1344569   | chr12:21,950,324-22,094,336 | AX-16901705  |

|       |             |                             |              |
|-------|-------------|-----------------------------|--------------|
| ABCC9 | rs4148651   | chr12:21,950,324-22,094,336 | AX-147868449 |
| ABCC9 | rs4148651   | chr12:21,950,324-22,094,336 | AX-147963730 |
| ABCC9 | rs139975827 | chr12:21,950,324-22,094,336 | AX-120994491 |
| ABCC9 | ---         | chr12:21,950,324-22,094,336 | AX-120836624 |
| ABCC9 | rs12821892  | chr12:21,950,324-22,094,336 | AX-119730425 |
| ABCC9 | rs12821892  | chr12:21,950,324-22,094,336 | AX-120771628 |
| ABCC9 | rs181534345 | chr12:21,950,324-22,094,336 | AX-96639807  |
| ABCC9 | rs181534345 | chr12:21,950,324-22,094,336 | AX-96934187  |
| ABCC9 | rs185890370 | chr12:21,950,324-22,094,336 | AX-105027452 |
| ABCC9 | rs185890370 | chr12:21,950,324-22,094,336 | AX-105051134 |
| ABCC9 | rs58386780  | chr12:21,950,324-22,094,336 | AX-16901709  |
| ABCC9 | rs3759236   | chr12:21,950,324-22,094,336 | AX-16901710  |
| ABCC9 | rs4148650   | chr12:21,950,324-22,094,336 | AX-112926257 |
| ABCC9 | rs4148650   | chr12:21,950,324-22,094,336 | AX-113482908 |
| ABCC9 | ---         | chr12:21,950,324-22,094,336 | AX-90027609  |
| ABCC9 | rs4148649   | chr12:21,950,324-22,094,336 | AX-12567567  |
| ABCC9 | rs34413975  | chr12:21,950,324-22,094,336 | AX-12552403  |
| ABCC9 | rs10770867  | chr12:21,950,324-22,094,336 | AX-16901716  |
| ABCC9 | rs11046234  | chr12:21,950,324-22,094,336 | AX-11139914  |
| ABCC9 | rs7136887   | chr12:21,950,324-22,094,336 | AX-113891693 |
| ABCC9 | rs7137250   | chr12:21,950,324-22,094,336 | AX-16901718  |
| ABCC9 | rs79470178  | chr12:21,950,324-22,094,336 | AX-16901720  |
| ABCC9 | rs11046235  | chr12:21,950,324-22,094,336 | AX-156270662 |
| ABCC9 | rs7300572   | chr12:21,950,324-22,094,336 | AX-112917884 |
| ABCC9 | rs7300572   | chr12:21,950,324-22,094,336 | AX-113957314 |
| ABCC9 | rs10770870  | chr12:21,950,324-22,094,336 | AX-113883421 |
| ABCC9 | rs10770870  | chr12:21,950,324-22,094,336 | AX-113957315 |
| ABCC9 | rs10770871  | chr12:21,950,324-22,094,336 | AX-16901722  |
| ABCC9 | rs113615977 | chr12:21,950,324-22,094,336 | AX-16901723  |
| ABCC9 | rs74693025  | chr12:21,950,324-22,094,336 | AX-30633043  |
| ABCC9 | rs76728072  | chr12:21,950,324-22,094,336 | AX-61431845  |
| ABCC9 | rs2900493   | chr12:21,950,324-22,094,336 | AX-112994720 |
| ABCC9 | rs113677041 | chr12:21,950,324-22,094,336 | AX-16901725  |
| ABCC9 | rs2277404   | chr12:21,950,324-22,094,336 | AX-11380820  |
| ABCC9 | rs2176394   | chr12:21,950,324-22,094,336 | AX-112994721 |
| ABCC9 | rs2277405   | chr12:21,950,324-22,094,336 | AX-113477300 |
| ABCC9 | rs870135    | chr12:21,950,324-22,094,336 | AX-16901727  |
| ABCC9 | rs870134    | chr12:21,950,324-22,094,336 | AX-39362633  |
| ABCC9 | rs1356370   | chr12:21,950,324-22,094,336 | AX-39362635  |
| ABCC9 | rs74067884  | chr12:21,950,324-22,094,336 | AX-50119962  |
| ABCC9 | rs200851499 | chr12:21,950,324-22,094,336 | AX-151434925 |
| ABCC9 | rs200851499 | chr12:21,950,324-22,094,336 | AX-156284968 |
| ABCC9 | rs7308081   | chr12:21,950,324-22,094,336 | AX-16901730  |
| ABCC9 | rs2138723   | chr12:21,950,324-22,094,336 | AX-16901733  |
| ABCC9 | rs7977434   | chr12:21,950,324-22,094,336 | AX-113561219 |
| ABCC9 | rs7977434   | chr12:21,950,324-22,094,336 | AX-156270663 |
| ABCC9 | rs12371738  | chr12:21,950,324-22,094,336 | AX-156270664 |
| ABCC9 | rs4762722   | chr12:21,950,324-22,094,336 | AX-39362687  |
| ABCC9 | rs74067890  | chr12:21,950,324-22,094,336 | AX-156279933 |
| ABCC9 | rs74067890  | chr12:21,950,324-22,094,336 | AX-156295491 |
| ABCC9 | rs4586220   | chr12:21,950,324-22,094,336 | AX-12575284  |
| ABCC9 | rs35677639  | chr12:21,950,324-22,094,336 | AX-16901757  |
| ABCC9 | rs7316271   | chr12:21,950,324-22,094,336 | AX-11620839  |
| ABCC9 | rs12315609  | chr12:21,950,324-22,094,336 | AX-39362709  |
| ABCC9 | rs11046238  | chr12:21,950,324-22,094,336 | AX-12405183  |

|       |             |                              |              |
|-------|-------------|------------------------------|--------------|
| ACTC1 | rs533021    | chr15:35,080,297-35,087,927  | AX-11543492  |
| ACTC1 | rs8037241   | chr15:35,080,297-35,087,927  | AX-12895725  |
| ACTC1 | rs589759    | chr15:35,080,297-35,087,927  | AX-107770170 |
| ACTC1 | rs589759    | chr15:35,080,297-35,087,927  | AX-123097322 |
| ACTC1 | rs34323254  | chr15:35,080,297-35,087,927  | AX-88766889  |
| ACTC1 | rs34323254  | chr15:35,080,297-35,087,927  | AX-88809934  |
| ACTC1 | rs1370155   | chr15:35,080,297-35,087,927  | AX-31584229  |
| ACTC1 | rs1370154   | chr15:35,080,297-35,087,927  | AX-12895731  |
| ACTC1 | rs74009720  | chr15:35,080,297-35,087,927  | AX-12895732  |
| ACTC1 | rs121912674 | chr15:35,080,297-35,087,927  | AX-88754026  |
| ACTC1 | rs267606629 | chr15:35,080,297-35,087,927  | AX-90055002  |
| ACTC1 | rs2307494   | chr15:35,080,297-35,087,927  | AX-31584239  |
| ACTC1 | ---         | chr15:35,080,297-35,087,927  | AX-90030603  |
| ACTC1 | rs121912673 | chr15:35,080,297-35,087,927  | AX-88797070  |
| ACTC1 | rs543030688 | chr15:35,080,297-35,087,927  | AX-90055003  |
| ACTC1 | ---         | chr15:35,080,297-35,087,927  | AX-90055004  |
| ACTC1 | ---         | chr15:35,080,297-35,087,927  | AX-90055005  |
| ACTC1 | rs121912675 | chr15:35,080,297-35,087,927  | AX-88754027  |
| ACTC1 | ---         | chr15:35,080,297-35,087,927  | AX-90055006  |
| ACTC1 | rs115415793 | chr15:35,080,297-35,087,927  | AX-31584241  |
| ACTC1 | rs62006139  | chr15:35,080,297-35,087,927  | AX-107799845 |
| ACTC1 | rs3729755   | chr15:35,080,297-35,087,927  | AX-12895738  |
| ACTC1 | ---         | chr15:35,080,297-35,087,927  | AX-90030266  |
| ACTC1 | ---         | chr15:35,080,297-35,087,927  | AX-90026123  |
| ACTC1 | ---         | chr15:35,080,297-35,087,927  | AX-90072209  |
| ACTC1 | ---         | chr15:35,080,297-35,087,927  | AX-90026124  |
| ACTC1 | rs267606628 | chr15:35,080,297-35,087,927  | AX-90026125  |
| ACTC1 | rs78697034  | chr15:35,080,297-35,087,927  | AX-12895739  |
| ACTC1 | rs2070664   | chr15:35,080,297-35,087,927  | AX-12895742  |
| ACTC1 | ---         | chr15:35,080,297-35,087,927  | AX-90035570  |
| ACTC1 | rs193922680 | chr15:35,080,297-35,087,927  | AX-88797084  |
| ACTC1 | ---         | chr15:35,080,297-35,087,927  | AX-90026126  |
| ACTC1 | ---         | chr15:35,080,297-35,087,927  | AX-90048292  |
| ACTC1 | rs121912676 | chr15:35,080,297-35,087,927  | AX-88754028  |
| ACTC1 | ---         | chr15:35,080,297-35,087,927  | AX-90052309  |
| ACTC1 | rs7165006   | chr15:35,080,297-35,087,927  | AX-12895744  |
| ACTC1 | rs7166290   | chr15:35,080,297-35,087,927  | AX-31584249  |
| ACTC1 | rs77350268  | chr15:35,080,297-35,087,927  | AX-31584251  |
| ACTC1 | rs7166484   | chr15:35,080,297-35,087,927  | AX-11611462  |
| ACTC1 | rs115586078 | chr15:35,080,297-35,087,927  | AX-31584253  |
| ACTC1 | rs28595759  | chr15:35,080,297-35,087,927  | AX-31584255  |
| ACTC1 | rs11629614  | chr15:35,080,297-35,087,927  | AX-62358117  |
| ACTC1 | rs77247635  | chr15:35,080,297-35,087,927  | AX-31584257  |
| ACTC1 | rs78848103  | chr15:35,080,297-35,087,927  | AX-12895746  |
| ACTC1 | ---         | chr15:35,080,297-35,087,927  | AX-156278706 |
| ACTC1 | ---         | chr15:35,080,297-35,087,927  | AX-156269309 |
| ACTN2 | rs121434525 | chr1:236,849,770-236,927,558 | AX-83357182  |
| ACTN2 | rs707221    | chr1:236,849,770-236,927,558 | AX-16947809  |
| ACTN2 | rs75716382  | chr1:236,849,770-236,927,558 | AX-16947820  |
| ACTN2 | rs115432678 | chr1:236,849,770-236,927,558 | AX-30720971  |
| ACTN2 | rs71721494  | chr1:236,849,770-236,927,558 | AX-156298314 |
| ACTN2 | rs7530968   | chr1:236,849,770-236,927,558 | AX-114085232 |
| ACTN2 | rs6656267   | chr1:236,849,770-236,927,558 | AX-51282400  |
| ACTN2 | rs10925200  | chr1:236,849,770-236,927,558 | AX-119579607 |
| ACTN2 | rs10925200  | chr1:236,849,770-236,927,558 | AX-148266783 |

|       |             |                              |              |
|-------|-------------|------------------------------|--------------|
| ACTN2 | rs72760272  | chr1:236,849,770-236,927,558 | AX-30721005  |
| ACTN2 | rs10465610  | chr1:236,849,770-236,927,558 | AX-30721007  |
| ACTN2 | rs3905125   | chr1:236,849,770-236,927,558 | AX-39409587  |
| ACTN2 | rs10802556  | chr1:236,849,770-236,927,558 | AX-156270947 |
| ACTN2 | rs707214    | chr1:236,849,770-236,927,558 | AX-11604873  |
| ACTN2 | rs140066235 | chr1:236,849,770-236,927,558 | AX-151221942 |
| ACTN2 | rs12739634  | chr1:236,849,770-236,927,558 | AX-50103992  |
| ACTN2 | rs819645    | chr1:236,849,770-236,927,558 | AX-156270951 |
| ACTN2 | rs819647    | chr1:236,849,770-236,927,558 | AX-156270952 |
| ACTN2 | rs4659703   | chr1:236,849,770-236,927,558 | AX-11515869  |
| ACTN2 | rs12067644  | chr1:236,849,770-236,927,558 | AX-30721045  |
| ACTN2 | rs12037834  | chr1:236,849,770-236,927,558 | AX-156270953 |
| ACTN2 | rs3910035   | chr1:236,849,770-236,927,558 | AX-16947872  |
| ACTN2 | rs12067001  | chr1:236,849,770-236,927,558 | AX-156270955 |
| ACTN2 | rs4659704   | chr1:236,849,770-236,927,558 | AX-113889821 |
| ACTN2 | rs4659704   | chr1:236,849,770-236,927,558 | AX-113963585 |
| ACTN2 | rs4659705   | chr1:236,849,770-236,927,558 | AX-30721069  |
| ACTN2 | rs819723    | chr1:236,849,770-236,927,558 | AX-96636384  |
| ACTN2 | rs71559976  | chr1:236,849,770-236,927,558 | AX-156285052 |
| ACTN2 | rs71559976  | chr1:236,849,770-236,927,558 | AX-30721071  |
| ACTN2 | rs112267838 | chr1:236,849,770-236,927,558 | AX-148501150 |
| ACTN2 | rs111507537 | chr1:236,849,770-236,927,558 | AX-113092712 |
| ACTN2 | rs111507537 | chr1:236,849,770-236,927,558 | AX-94348327  |
| ACTN2 | rs61831762  | chr1:236,849,770-236,927,558 | AX-120674319 |
| ACTN2 | ---         | chr1:236,849,770-236,927,558 | AX-156270527 |
| ACTN2 | rs35601280  | chr1:236,849,770-236,927,558 | AX-113082702 |
| ACTN2 | rs35601280  | chr1:236,849,770-236,927,558 | AX-113601052 |
| ACTN2 | rs1418071   | chr1:236,849,770-236,927,558 | AX-39409623  |
| ACTN2 | rs202081364 | chr1:236,849,770-236,927,558 | AX-156284293 |
| ACTN2 | rs78688460  | chr1:236,849,770-236,927,558 | AX-16947874  |
| ACTN2 | rs111888885 | chr1:236,849,770-236,927,558 | AX-120159998 |
| ACTN2 | rs111888885 | chr1:236,849,770-236,927,558 | AX-156270529 |
| ACTN2 | rs2275399   | chr1:236,849,770-236,927,558 | AX-30721101  |
| ACTN2 | rs1366989   | chr1:236,849,770-236,927,558 | AX-11256886  |
| ACTN2 | rs397516579 | chr1:236,849,770-236,927,558 | AX-90034278  |
| ACTN2 | rs41269355  | chr1:236,849,770-236,927,558 | AX-30721103  |
| ACTN2 | rs1652226   | chr1:236,849,770-236,927,558 | AX-11280238  |
| ACTN2 | rs111438104 | chr1:236,849,770-236,927,558 | AX-148774889 |
| ACTN2 | rs111438104 | chr1:236,849,770-236,927,558 | AX-98053950  |
| ACTN2 | rs1341863   | chr1:236,849,770-236,927,558 | AX-16947877  |
| ACTN2 | rs1341862   | chr1:236,849,770-236,927,558 | AX-39409631  |
| ACTN2 | rs66469169  | chr1:236,849,770-236,927,558 | AX-151302312 |
| ACTN2 | rs112967359 | chr1:236,849,770-236,927,558 | AX-156270591 |
| ACTN2 | rs1622066   | chr1:236,849,770-236,927,558 | AX-30721115  |
| ACTN2 | rs1773441   | chr1:236,849,770-236,927,558 | AX-39409663  |
| ACTN2 | rs12081658  | chr1:236,849,770-236,927,558 | AX-16947888  |
| ACTN2 | rs2564764   | chr1:236,849,770-236,927,558 | AX-39409675  |
| ACTN2 | ---         | chr1:236,849,770-236,927,558 | AX-156270959 |
| ACTN2 | rs2994382   | chr1:236,849,770-236,927,558 | AX-16947896  |
| ACTN2 | rs4659707   | chr1:236,849,770-236,927,558 | AX-148495629 |
| ACTN2 | rs76345693  | chr1:236,849,770-236,927,558 | AX-16947900  |
| ACTN2 | rs819640    | chr1:236,849,770-236,927,558 | AX-16947904  |
| ACTN2 | rs819641    | chr1:236,849,770-236,927,558 | AX-11667994  |
| ACTN2 | rs819725    | chr1:236,849,770-236,927,558 | AX-105054677 |
| ACTN2 | rs2039744   | chr1:236,849,770-236,927,558 | AX-11362196  |



|       |             |                              |              |
|-------|-------------|------------------------------|--------------|
| ACTN2 | rs4659708   | chr1:236,849,770-236,927,558 | AX-16947916  |
| ACTN2 | rs11355106  | chr1:236,849,770-236,927,558 | AX-107811671 |
| ACTN2 | rs12141939  | chr1:236,849,770-236,927,558 | AX-156270964 |
| ACTN2 | rs12138531  | chr1:236,849,770-236,927,558 | AX-148151140 |
| ACTN2 | rs3768125   | chr1:236,849,770-236,927,558 | AX-16947925  |
| ACTN2 | rs3768126   | chr1:236,849,770-236,927,558 | AX-30721157  |
| ACTN2 | rs2288601   | chr1:236,849,770-236,927,558 | AX-16947927  |
| ACTN2 | rs2288602   | chr1:236,849,770-236,927,558 | AX-30721161  |
| ACTN2 | rs2385493   | chr1:236,849,770-236,927,558 | AX-156270973 |
| ACTN2 | rs12087874  | chr1:236,849,770-236,927,558 | AX-156270965 |
| ACTN2 | rs2385494   | chr1:236,849,770-236,927,558 | AX-11388684  |
| ACTN2 | ---         | chr1:236,849,770-236,927,558 | AX-156284434 |
| ACTN2 | rs2891794   | chr1:236,849,770-236,927,558 | AX-149098849 |
| ACTN2 | rs2385495   | chr1:236,849,770-236,927,558 | AX-148163191 |
| ACTN2 | rs2385495   | chr1:236,849,770-236,927,558 | AX-88790734  |
| ACTN2 | rs2385496   | chr1:236,849,770-236,927,558 | AX-156270966 |
| ACTN2 | rs2385497   | chr1:236,849,770-236,927,558 | AX-156270967 |
| ACTN2 | rs2385497   | chr1:236,849,770-236,927,558 | AX-156289615 |
| ACTN2 | rs7555260   | chr1:236,849,770-236,927,558 | AX-156289616 |
| ACTN2 | rs2891795   | chr1:236,849,770-236,927,558 | AX-11425203  |
| ACTN2 | rs116111094 | chr1:236,849,770-236,927,558 | AX-30721169  |
| ACTN2 | rs12137069  | chr1:236,849,770-236,927,558 | AX-120559650 |
| ACTN2 | rs61831786  | chr1:236,849,770-236,927,558 | AX-30721173  |
| ACTN2 | rs12090481  | chr1:236,849,770-236,927,558 | AX-30721177  |
| ACTN2 | rs148628512 | chr1:236,849,770-236,927,558 | AX-151193722 |
| ACTN2 | rs12737976  | chr1:236,849,770-236,927,558 | AX-30721181  |
| ACTN2 | ---         | chr1:236,849,770-236,927,558 | AX-39409715  |
| ACTN2 | rs34583860  | chr1:236,849,770-236,927,558 | AX-16947935  |
| ACTN2 | rs34827377  | chr1:236,849,770-236,927,558 | AX-83244981  |
| ACTN2 | rs75222641  | chr1:236,849,770-236,927,558 | AX-30721199  |
| ACTN2 | rs10802557  | chr1:236,849,770-236,927,558 | AX-39409725  |
| ACTN2 | rs10802558  | chr1:236,849,770-236,927,558 | AX-11122969  |
| ACTN2 | rs7518515   | chr1:236,849,770-236,927,558 | AX-156270969 |
| ACTN2 | rs7518515   | chr1:236,849,770-236,927,558 | AX-156289618 |
| ACTN2 | rs2297956   | chr1:236,849,770-236,927,558 | AX-11383145  |
| ACTN2 | rs2297955   | chr1:236,849,770-236,927,558 | AX-11383144  |
| ACTN2 | rs4659712   | chr1:236,849,770-236,927,558 | AX-123026530 |
| ACTN2 | rs12143369  | chr1:236,849,770-236,927,558 | AX-11192801  |
| ACTN2 | rs10925213  | chr1:236,849,770-236,927,558 | AX-16947958  |
| ACTN2 | rs6677567   | chr1:236,849,770-236,927,558 | AX-151330830 |
| ACTN2 | rs2297860   | chr1:236,849,770-236,927,558 | AX-30721229  |
| ACTN2 | rs34975493  | chr1:236,849,770-236,927,558 | AX-39409745  |
| ACTN2 | rs3768127   | chr1:236,849,770-236,927,558 | AX-156289622 |
| ACTN2 | rs10925214  | chr1:236,849,770-236,927,558 | AX-113117883 |
| ACTN2 | rs78597259  | chr1:236,849,770-236,927,558 | AX-121845229 |
| ACTN2 | rs114373110 | chr1:236,849,770-236,927,558 | AX-156297589 |
| ACTN2 | rs76712595  | chr1:236,849,770-236,927,558 | AX-121853004 |
| ACTN2 | rs77166823  | chr1:236,849,770-236,927,558 | AX-148066482 |
| ACTN2 | rs10802561  | chr1:236,849,770-236,927,558 | AX-156270978 |
| ACTN2 | rs35311500  | chr1:236,849,770-236,927,558 | AX-156271214 |
| ACTN2 | rs12730862  | chr1:236,849,770-236,927,558 | AX-156270981 |
| ACTN2 | rs4348712   | chr1:236,849,770-236,927,558 | AX-148244317 |
| ACTN2 | rs1051251   | chr1:236,849,770-236,927,558 | AX-84960862  |
| ACTN2 | rs7522310   | chr1:236,849,770-236,927,558 | AX-16947978  |
| AKAP9 | rs2282971   | chr7:91,570,189-91,739,987   | AX-15777352  |

|       |             |                              |              |
|-------|-------------|------------------------------|--------------|
| AKAP9 | rs142401936 | chr7:91,570,189-91,739,987   | AX-83389422  |
| AKAP9 | rs35669569  | chr7:91,570,189-91,739,987   | AX-11467942  |
| AKAP9 | rs6972637   | chr7:91,570,189-91,739,987   | AX-11598196  |
| AKAP9 | rs35963176  | chr7:91,570,189-91,739,987   | AX-12558140  |
| AKAP9 | rs144888041 | chr7:91,570,189-91,739,987   | AX-82975857  |
| AKAP9 | ---         | chr7:91,570,189-91,739,987   | AX-90080276  |
| AKAP9 | rs4729017   | chr7:91,570,189-91,739,987   | AX-15777422  |
| AKAP9 | rs6964587   | chr7:91,570,189-91,739,987   | AX-11597604  |
| AKAP9 | ---         | chr7:91,570,189-91,739,987   | AX-90071991  |
| AKAP9 | rs1989779   | chr7:91,570,189-91,739,987   | AX-11357935  |
| AKAP9 | rs372572545 | chr7:91,570,189-91,739,987   | AX-94356858  |
| AKAP9 | rs13245393  | chr7:91,570,189-91,739,987   | AX-15777452  |
| AKAP9 | ---         | chr7:91,570,189-91,739,987   | AX-86655148  |
| AKAP9 | rs146797353 | chr7:91,570,189-91,739,987   | AX-15777468  |
| AKAP9 | rs80306000  | chr7:91,570,189-91,739,987   | AX-15777502  |
| AKAP9 | rs150379637 | chr7:91,570,189-91,739,987   | AX-83443886  |
| AKAP9 | rs121908566 | chr7:91,570,189-91,739,987   | AX-86580018  |
| AKAP9 | ---         | chr7:91,570,189-91,739,987   | AX-94356859  |
| AKAP9 | ---         | chr7:91,570,189-91,739,987   | AX-38374467  |
| AKAP9 | rs146305558 | chr7:91,570,189-91,739,987   | AX-82974783  |
| AKAP9 | rs150016098 | chr7:91,570,189-91,739,987   | AX-83545043  |
| AKAP9 | rs151021935 | chr7:91,570,189-91,739,987   | AX-82900534  |
| AKAP9 | rs539680958 | chr7:91,570,189-91,739,987   | AX-90045982  |
| AKAP9 | ---         | chr7:91,570,189-91,739,987   | AX-86636799  |
| AKAP9 | rs2285686   | chr7:91,570,189-91,739,987   | AX-86656338  |
| AKAP9 | ---         | chr7:91,570,189-91,739,987   | AX-94356860  |
| AKAP9 | rs10236397  | chr7:91,570,189-91,739,987   | AX-15777573  |
| AKAP9 | ---         | chr7:91,570,189-91,739,987   | AX-86644792  |
| AKAP9 | rs61757671  | chr7:91,570,189-91,739,987   | AX-83108620  |
| AKAP9 | rs73226383  | chr7:91,570,189-91,739,987   | AX-83252503  |
| AKAP9 | rs76177450  | chr7:91,570,189-91,739,987   | AX-83111269  |
| AKAP9 | ---         | chr7:91,570,189-91,739,987   | AX-86700376  |
| AKAP9 | rs34581834  | chr7:91,570,189-91,739,987   | AX-11449387  |
| AKAP9 | rs61757672  | chr7:91,570,189-91,739,987   | AX-83404812  |
| AKAP9 | rs35759833  | chr7:91,570,189-91,739,987   | AX-36360277  |
| AKAP9 | rs144875383 | chr7:91,570,189-91,739,987   | AX-82906465  |
| AKAP9 | rs6960867   | chr7:91,570,189-91,739,987   | AX-11597305  |
| AKAP9 | rs1063242   | chr7:91,570,189-91,739,987   | AX-83577138  |
| AKAP9 | rs28927678  | chr7:91,570,189-91,739,987   | AX-15777621  |
| AKAP9 | ---         | chr7:91,570,189-91,739,987   | AX-86585755  |
| AKAP9 | rs145355395 | chr7:91,570,189-91,739,987   | AX-86644214  |
| AKAP9 | rs61757663  | chr7:91,570,189-91,739,987   | AX-83499669  |
| AKAP9 | ---         | chr7:91,570,189-91,739,987   | AX-94356861  |
| AKAP9 | rs1063243   | chr7:91,570,189-91,739,987   | AX-15777641  |
| AKAP9 | rs34327395  | chr7:91,570,189-91,739,987   | AX-11445071  |
| AKAP9 | rs141856443 | chr7:91,570,189-91,739,987   | AX-83468071  |
| AKAP9 | rs62465453  | chr7:91,570,189-91,739,987   | AX-36360331  |
| AKAP9 | rs57816416  | chr7:91,570,189-91,739,987   | AX-36360333  |
| AKAP9 | rs7785971   | chr7:91,570,189-91,739,987   | AX-112222477 |
| AKAP9 | rs2049900   | chr7:91,570,189-91,739,987   | AX-15777665  |
| ANK2  | rs72669658  | chr4:113,739,239-114,304,896 | AX-14447068  |
| ANK2  | rs7681443   | chr4:113,739,239-114,304,896 | AX-11638431  |
| ANK2  | rs17615061  | chr4:113,739,239-114,304,896 | AX-34511795  |
| ANK2  | rs72669667  | chr4:113,739,239-114,304,896 | AX-14447093  |
| ANK2  | rs17045043  | chr4:113,739,239-114,304,896 | AX-41331273  |

|      |             |                              |             |
|------|-------------|------------------------------|-------------|
| ANK2 | rs80172156  | chr4:113,739,239-114,304,896 | AX-14447117 |
| ANK2 | rs10461149  | chr4:113,739,239-114,304,896 | AX-14447133 |
| ANK2 | rs11098176  | chr4:113,739,239-114,304,896 | AX-12406834 |
| ANK2 | rs17045062  | chr4:113,739,239-114,304,896 | AX-14447144 |
| ANK2 | rs17672142  | chr4:113,739,239-114,304,896 | AX-11334345 |
| ANK2 | rs17672170  | chr4:113,739,239-114,304,896 | AX-11334347 |
| ANK2 | rs1448224   | chr4:113,739,239-114,304,896 | AX-11264543 |
| ANK2 | rs1448221   | chr4:113,739,239-114,304,896 | AX-11264542 |
| ANK2 | rs78771853  | chr4:113,739,239-114,304,896 | AX-66179256 |
| ANK2 | rs17045076  | chr4:113,739,239-114,304,896 | AX-11300743 |
| ANK2 | rs62317087  | chr4:113,739,239-114,304,896 | AX-14447179 |
| ANK2 | rs17672625  | chr4:113,739,239-114,304,896 | AX-11334375 |
| ANK2 | rs73840923  | chr4:113,739,239-114,304,896 | AX-14447206 |
| ANK2 | rs72669682  | chr4:113,739,239-114,304,896 | AX-14447213 |
| ANK2 | rs75876568  | chr4:113,739,239-114,304,896 | AX-34511933 |
| ANK2 | rs62317090  | chr4:113,739,239-114,304,896 | AX-14447225 |
| ANK2 | rs17045102  | chr4:113,739,239-114,304,896 | AX-41331333 |
| ANK2 | rs28691029  | chr4:113,739,239-114,304,896 | AX-14447255 |
| ANK2 | rs10016365  | chr4:113,739,239-114,304,896 | AX-11087538 |
| ANK2 | rs78842575  | chr4:113,739,239-114,304,896 | AX-14447278 |
| ANK2 | rs80143944  | chr4:113,739,239-114,304,896 | AX-14447288 |
| ANK2 | rs115302470 | chr4:113,739,239-114,304,896 | AX-38158151 |
| ANK2 | rs72669685  | chr4:113,739,239-114,304,896 | AX-34511981 |
| ANK2 | rs60365916  | chr4:113,739,239-114,304,896 | AX-14447299 |
| ANK2 | rs77583732  | chr4:113,739,239-114,304,896 | AX-14447301 |
| ANK2 | rs72669686  | chr4:113,739,239-114,304,896 | AX-34511983 |
| ANK2 | rs4404544   | chr4:113,739,239-114,304,896 | AX-11504287 |
| ANK2 | rs72892477  | chr4:113,739,239-114,304,896 | AX-14447319 |
| ANK2 | rs77023571  | chr4:113,739,239-114,304,896 | AX-14447329 |
| ANK2 | rs75994832  | chr4:113,739,239-114,304,896 | AX-14447334 |
| ANK2 | rs10030826  | chr4:113,739,239-114,304,896 | AX-11088409 |
| ANK2 | rs17617357  | chr4:113,739,239-114,304,896 | AX-34512019 |
| ANK2 | rs949758    | chr4:113,739,239-114,304,896 | AX-11690112 |
| ANK2 | rs11940222  | chr4:113,739,239-114,304,896 | AX-14447371 |
| ANK2 | rs72894426  | chr4:113,739,239-114,304,896 | AX-14447378 |
| ANK2 | rs57162454  | chr4:113,739,239-114,304,896 | AX-66179591 |
| ANK2 | rs11930182  | chr4:113,739,239-114,304,896 | AX-12423296 |
| ANK2 | rs7664907   | chr4:113,739,239-114,304,896 | AX-41331403 |
| ANK2 | rs58298152  | chr4:113,739,239-114,304,896 | AX-14447418 |
| ANK2 | rs115148989 | chr4:113,739,239-114,304,896 | AX-14447420 |
| ANK2 | rs75870428  | chr4:113,739,239-114,304,896 | AX-14447423 |
| ANK2 | rs6820742   | chr4:113,739,239-114,304,896 | AX-11587792 |
| ANK2 | rs12501268  | chr4:113,739,239-114,304,896 | AX-11210656 |
| ANK2 | rs1354679   | chr4:113,739,239-114,304,896 | AX-14447435 |
| ANK2 | rs72894462  | chr4:113,739,239-114,304,896 | AX-14447436 |
| ANK2 | rs28444313  | chr4:113,739,239-114,304,896 | AX-41331425 |
| ANK2 | rs12508918  | chr4:113,739,239-114,304,896 | AX-11211194 |
| ANK2 | rs17680403  | chr4:113,739,239-114,304,896 | AX-34512147 |
| ANK2 | rs2055655   | chr4:113,739,239-114,304,896 | AX-14447465 |
| ANK2 | rs17045344  | chr4:113,739,239-114,304,896 | AX-12487347 |
| ANK2 | rs78977334  | chr4:113,739,239-114,304,896 | AX-14447472 |
| ANK2 | rs17618891  | chr4:113,739,239-114,304,896 | AX-11331553 |
| ANK2 | rs17680801  | chr4:113,739,239-114,304,896 | AX-11334809 |
| ANK2 | rs1395112   | chr4:113,739,239-114,304,896 | AX-11259534 |
| ANK2 | rs10029917  | chr4:113,739,239-114,304,896 | AX-34512205 |

|      |             |                              |             |
|------|-------------|------------------------------|-------------|
| ANK2 | rs13103796  | chr4:113,739,239-114,304,896 | AX-14447512 |
| ANK2 | rs9994849   | chr4:113,739,239-114,304,896 | AX-11714691 |
| ANK2 | rs10015472  | chr4:113,739,239-114,304,896 | AX-11087485 |
| ANK2 | rs75173266  | chr4:113,739,239-114,304,896 | AX-66179837 |
| ANK2 | rs9685098   | chr4:113,739,239-114,304,896 | AX-14447540 |
| ANK2 | rs7654153   | chr4:113,739,239-114,304,896 | AX-11636568 |
| ANK2 | rs17045456  | chr4:113,739,239-114,304,896 | AX-41331493 |
| ANK2 | rs77422045  | chr4:113,739,239-114,304,896 | AX-14447544 |
| ANK2 | rs17045462  | chr4:113,739,239-114,304,896 | AX-11300781 |
| ANK2 | rs6856101   | chr4:113,739,239-114,304,896 | AX-11590204 |
| ANK2 | rs78095449  | chr4:113,739,239-114,304,896 | AX-14447547 |
| ANK2 | rs11098185  | chr4:113,739,239-114,304,896 | AX-11143554 |
| ANK2 | rs313936    | chr4:113,739,239-114,304,896 | AX-11436104 |
| ANK2 | rs3822280   | chr4:113,739,239-114,304,896 | AX-50400559 |
| ANK2 | rs56334442  | chr4:113,739,239-114,304,896 | AX-34512253 |
| ANK2 | rs80077887  | chr4:113,739,239-114,304,896 | AX-14447550 |
| ANK2 | rs1026975   | chr4:113,739,239-114,304,896 | AX-11103231 |
| ANK2 | rs931838    | chr4:113,739,239-114,304,896 | AX-11680692 |
| ANK2 | rs313985    | chr4:113,739,239-114,304,896 | AX-11436109 |
| ANK2 | rs313984    | chr4:113,739,239-114,304,896 | AX-34512269 |
| ANK2 | rs313979    | chr4:113,739,239-114,304,896 | AX-11436108 |
| ANK2 | rs116785665 | chr4:113,739,239-114,304,896 | AX-66179917 |
| ANK2 | rs72671580  | chr4:113,739,239-114,304,896 | AX-14447571 |
| ANK2 | rs11726017  | chr4:113,739,239-114,304,896 | AX-41331525 |
| ANK2 | rs7690846   | chr4:113,739,239-114,304,896 | AX-11639084 |
| ANK2 | rs644851    | chr4:113,739,239-114,304,896 | AX-14447574 |
| ANK2 | rs582050    | chr4:113,739,239-114,304,896 | AX-11547791 |
| ANK2 | rs4834311   | chr4:113,739,239-114,304,896 | AX-11529795 |
| ANK2 | rs2279891   | chr4:113,739,239-114,304,896 | AX-11381121 |
| ANK2 | rs2279893   | chr4:113,739,239-114,304,896 | AX-11381123 |
| ANK2 | rs78209121  | chr4:113,739,239-114,304,896 | AX-14447587 |
| ANK2 | rs7694725   | chr4:113,739,239-114,304,896 | AX-11639344 |
| ANK2 | rs67235248  | chr4:113,739,239-114,304,896 | AX-34512345 |
| ANK2 | rs72671592  | chr4:113,739,239-114,304,896 | AX-14447601 |
| ANK2 | rs72906144  | chr4:113,739,239-114,304,896 | AX-14447603 |
| ANK2 | rs313968    | chr4:113,739,239-114,304,896 | AX-41331543 |
| ANK2 | rs115137877 | chr4:113,739,239-114,304,896 | AX-14447608 |
| ANK2 | rs74597555  | chr4:113,739,239-114,304,896 | AX-14447651 |
| ANK2 | rs626267    | chr4:113,739,239-114,304,896 | AX-14447656 |
| ANK2 | rs9996681   | chr4:113,739,239-114,304,896 | AX-14447676 |
| ANK2 | rs313958    | chr4:113,739,239-114,304,896 | AX-11436107 |
| ANK2 | rs73841214  | chr4:113,739,239-114,304,896 | AX-34512447 |
| ANK2 | rs7682237   | chr4:113,739,239-114,304,896 | AX-14447733 |
| ANK2 | rs594604    | chr4:113,739,239-114,304,896 | AX-41331679 |
| ANK2 | rs62313807  | chr4:113,739,239-114,304,896 | AX-14447756 |
| ANK2 | rs1506062   | chr4:113,739,239-114,304,896 | AX-14447791 |
| ANK2 | rs17683210  | chr4:113,739,239-114,304,896 | AX-41331719 |
| ANK2 | rs2202535   | chr4:113,739,239-114,304,896 | AX-11374750 |
| ANK2 | rs13102062  | chr4:113,739,239-114,304,896 | AX-34512579 |
| ANK2 | rs6854397   | chr4:113,739,239-114,304,896 | AX-11590097 |
| ANK2 | rs17579913  | chr4:113,739,239-114,304,896 | AX-34512617 |
| ANK2 | rs12644844  | chr4:113,739,239-114,304,896 | AX-41331749 |
| ANK2 | rs13101312  | chr4:113,739,239-114,304,896 | AX-11239537 |
| ANK2 | rs403618    | chr4:113,739,239-114,304,896 | AX-34512655 |
| ANK2 | rs17444886  | chr4:113,739,239-114,304,896 | AX-11324509 |

|      |             |                              |             |
|------|-------------|------------------------------|-------------|
| ANK2 | rs17590579  | chr4:113,739,239-114,304,896 | AX-11330250 |
| ANK2 | rs404950    | chr4:113,739,239-114,304,896 | AX-11489617 |
| ANK2 | rs4833422   | chr4:113,739,239-114,304,896 | AX-11529723 |
| ANK2 | rs10012958  | chr4:113,739,239-114,304,896 | AX-34512713 |
| ANK2 | rs62313181  | chr4:113,739,239-114,304,896 | AX-14447949 |
| ANK2 | rs1485585   | chr4:113,739,239-114,304,896 | AX-34512745 |
| ANK2 | rs3214164   | chr4:113,739,239-114,304,896 | AX-83199127 |
| ANK2 | rs116498616 | chr4:113,739,239-114,304,896 | AX-14448012 |
| ANK2 | rs28507635  | chr4:113,739,239-114,304,896 | AX-34512819 |
| ANK2 | rs1468223   | chr4:113,739,239-114,304,896 | AX-11266337 |
| ANK2 | rs115423781 | chr4:113,739,239-114,304,896 | AX-34512863 |
| ANK2 | rs10488901  | chr4:113,739,239-114,304,896 | AX-11109973 |
| ANK2 | rs112818121 | chr4:113,739,239-114,304,896 | AX-14448070 |
| ANK2 | rs56075451  | chr4:113,739,239-114,304,896 | AX-34512883 |
| ANK2 | rs362464    | chr4:113,739,239-114,304,896 | AX-11475801 |
| ANK2 | rs362461    | chr4:113,739,239-114,304,896 | AX-14448083 |
| ANK2 | ---         | chr4:113,739,239-114,304,896 | AX-92618746 |
| ANK2 | rs362508    | chr4:113,739,239-114,304,896 | AX-34512895 |
| ANK2 | rs3025734   | chr4:113,739,239-114,304,896 | AX-11432155 |
| ANK2 | rs29336     | chr4:113,739,239-114,304,896 | AX-14448147 |
| ANK2 | rs29407     | chr4:113,739,239-114,304,896 | AX-41331935 |
| ANK2 | rs72675218  | chr4:113,739,239-114,304,896 | AX-34512977 |
| ANK2 | ---         | chr4:113,739,239-114,304,896 | AX-94355464 |
| ANK2 | rs29388     | chr4:113,739,239-114,304,896 | AX-41331959 |
| ANK2 | rs29385     | chr4:113,739,239-114,304,896 | AX-11427953 |
| ANK2 | rs29327     | chr4:113,739,239-114,304,896 | AX-11427693 |
| ANK2 | rs200990814 | chr4:113,739,239-114,304,896 | AX-83365001 |
| ANK2 | rs17629658  | chr4:113,739,239-114,304,896 | AX-41332021 |
| ANK2 | rs29308     | chr4:113,739,239-114,304,896 | AX-14448244 |
| ANK2 | rs6837523   | chr4:113,739,239-114,304,896 | AX-11588962 |
| ANK2 | rs75257820  | chr4:113,739,239-114,304,896 | AX-38158313 |
| ANK2 | rs35388528  | chr4:113,739,239-114,304,896 | AX-11463100 |
| ANK2 | rs7684392   | chr4:113,739,239-114,304,896 | AX-14448286 |
| ANK2 | rs13126750  | chr4:113,739,239-114,304,896 | AX-41332057 |
| ANK2 | rs56256480  | chr4:113,739,239-114,304,896 | AX-34513123 |
| ANK2 | rs10005957  | chr4:113,739,239-114,304,896 | AX-11086888 |
| ANK2 | rs2272229   | chr4:113,739,239-114,304,896 | AX-14448335 |
| ANK2 | ---         | chr4:113,739,239-114,304,896 | AX-92520897 |
| ANK2 | rs56148912  | chr4:113,739,239-114,304,896 | AX-14448353 |
| ANK2 | rs72544141  | chr4:113,739,239-114,304,896 | AX-82920125 |
| ANK2 | rs2272235   | chr4:113,739,239-114,304,896 | AX-14448359 |
| ANK2 | rs35249198  | chr4:113,739,239-114,304,896 | AX-11460743 |
| ANK2 | rs138842207 | chr4:113,739,239-114,304,896 | AX-82935989 |
| ANK2 | ---         | chr4:113,739,239-114,304,896 | AX-94372215 |
| ANK2 | ---         | chr4:113,739,239-114,304,896 | AX-90048094 |
| ANK2 | rs201005444 | chr4:113,739,239-114,304,896 | AX-83125938 |
| ANK2 | rs200765866 | chr4:113,739,239-114,304,896 | AX-83319883 |
| ANK2 | rs149645600 | chr4:113,739,239-114,304,896 | AX-83173944 |
| ANK2 | rs61734477  | chr4:113,739,239-114,304,896 | AX-34513173 |
| ANK2 | rs28377576  | chr4:113,739,239-114,304,896 | AX-41332073 |
| ANK2 | rs141191319 | chr4:113,739,239-114,304,896 | AX-83442077 |
| ANK2 | rs145895389 | chr4:113,739,239-114,304,896 | AX-83190304 |
| ANK2 | rs3733617   | chr4:113,739,239-114,304,896 | AX-41332077 |
| ANK2 | ---         | chr4:113,739,239-114,304,896 | AX-94355466 |
| ANK2 | rs138928206 | chr4:113,739,239-114,304,896 | AX-83391944 |

|        |             |                              |              |
|--------|-------------|------------------------------|--------------|
| ANK2   | rs149043752 | chr4:113,739,239-114,304,896 | AX-83205280  |
| ANK2   | rs36210417  | chr4:113,739,239-114,304,896 | AX-83284707  |
| ANK2   | rs34270799  | chr4:113,739,239-114,304,896 | AX-11444097  |
| ANK2   | ---         | chr4:113,739,239-114,304,896 | AX-94355467  |
| ANK2   | rs142908806 | chr4:113,739,239-114,304,896 | AX-83126514  |
| ANK2   | rs180843436 | chr4:113,739,239-114,304,896 | AX-86594126  |
| ANK2   | ---         | chr4:113,739,239-114,304,896 | AX-86643123  |
| ANK2   | rs45570339  | chr4:113,739,239-114,304,896 | AX-34513201  |
| ANK2   | rs35728190  | chr4:113,739,239-114,304,896 | AX-34513203  |
| ANK2   | rs143228029 | chr4:113,739,239-114,304,896 | AX-86577334  |
| ANK2   | rs66785829  | chr4:113,739,239-114,304,896 | AX-83250290  |
| ANK2   | ---         | chr4:113,739,239-114,304,896 | AX-90057636  |
| ANK2   | rs35530544  | chr4:113,739,239-114,304,896 | AX-12556504  |
| ANK2   | rs121912705 | chr4:113,739,239-114,304,896 | AX-83491348  |
| ANK2   | rs148654834 | chr4:113,739,239-114,304,896 | AX-82949484  |
| ANK2   | ---         | chr4:113,739,239-114,304,896 | AX-90028844  |
| ANK2   | ---         | chr4:113,739,239-114,304,896 | AX-86656492  |
| ANK2   | rs121912706 | chr4:113,739,239-114,304,896 | AX-83219620  |
| ANK2   | rs45454496  | chr4:113,739,239-114,304,896 | AX-83126387  |
| ANK2   | rs377555678 | chr4:113,739,239-114,304,896 | AX-92653851  |
| ANK2   | rs3733618   | chr4:113,739,239-114,304,896 | AX-11476680  |
| ANK2   | rs35446871  | chr4:113,739,239-114,304,896 | AX-11464119  |
| ANKRD1 | rs3939      | chr10:92,671,857-92,681,032  | AX-16427927  |
| ANKRD1 | rs17102362  | chr10:92,671,857-92,681,032  | AX-16427929  |
| ANKRD1 | rs11186367  | chr10:92,671,857-92,681,032  | AX-16427931  |
| ANKRD1 | rs35550482  | chr10:92,671,857-92,681,032  | AX-83558735  |
| ANKRD1 | rs377074932 | chr10:92,671,857-92,681,032  | AX-92011114  |
| ANKRD1 | ---         | chr10:92,671,857-92,681,032  | AX-92009177  |
| ANKRD1 | rs3839929   | chr10:92,671,857-92,681,032  | AX-11484162  |
| ANKRD1 | rs150275749 | chr10:92,671,857-92,681,032  | AX-148792606 |
| ANKRD1 | rs150275749 | chr10:92,671,857-92,681,032  | AX-156297636 |
| ANKRD1 | ---         | chr10:92,671,857-92,681,032  | AX-90061121  |
| ANKRD1 | rs4933200   | chr10:92,671,857-92,681,032  | AX-16427936  |
| ANKRD1 | rs201380490 | chr10:92,671,857-92,681,032  | AX-151333967 |
| ANKRD1 | rs201380490 | chr10:92,671,857-92,681,032  | AX-97324804  |
| ANKRD1 | ---         | chr10:92,671,857-92,681,032  | AX-90025762  |
| ANKRD1 | rs147683124 | chr10:92,671,857-92,681,032  | AX-151406221 |
| ANKRD1 | rs147683124 | chr10:92,671,857-92,681,032  | AX-156284845 |
| ANKRD1 | rs59146072  | chr10:92,671,857-92,681,032  | AX-16427942  |
| ANKRD1 | rs10881853  | chr10:92,671,857-92,681,032  | AX-156278644 |
| ANKRD1 | rs10881853  | chr10:92,671,857-92,681,032  | AX-156294850 |
| ANKRD1 | rs145387010 | chr10:92,671,857-92,681,032  | AX-83104394  |
| ANKRD1 | rs142354133 | chr10:92,671,857-92,681,032  | AX-90037652  |
| ANKRD1 | rs11595794  | chr10:92,671,857-92,681,032  | AX-91978877  |
| ANKRD1 | rs11595794  | chr10:92,671,857-92,681,032  | AX-96645103  |
| ANKRD1 | rs10881854  | chr10:92,671,857-92,681,032  | AX-153734036 |
| ANKRD1 | rs201949081 | chr10:92,671,857-92,681,032  | AX-151220963 |
| ANKRD1 | rs201949081 | chr10:92,671,857-92,681,032  | AX-156283636 |
| ANKRD1 | rs56177217  | chr10:92,671,857-92,681,032  | AX-16427946  |
| ANKRD1 | rs114435632 | chr10:92,671,857-92,681,032  | AX-16427947  |
| ANKRD1 | rs10047267  | chr10:92,671,857-92,681,032  | AX-113228201 |
| ANKRD1 | rs10047267  | chr10:92,671,857-92,681,032  | AX-156279456 |
| ANKRD1 | rs150797476 | chr10:92,671,857-92,681,032  | AX-86589160  |
| ANKRD1 | ---         | chr10:92,671,857-92,681,032  | AX-90027313  |
| ANKRD1 | ---         | chr10:92,671,857-92,681,032  | AX-90054648  |

|        |             |                               |              |
|--------|-------------|-------------------------------|--------------|
| ANKRD1 | rs10881855  | chr10:92,671,857-92,681,032   | AX-11129106  |
| BAG3   | rs11199059  | chr10:121,410,882-121,437,329 | AX-156288737 |
| BAG3   | rs112168846 | chr10:121,410,882-121,437,329 | AX-156278488 |
| BAG3   | rs2577336   | chr10:121,410,882-121,437,329 | AX-156288738 |
| BAG3   | rs196335    | chr10:121,410,882-121,437,329 | AX-147886140 |
| BAG3   | rs55725412  | chr10:121,410,882-121,437,329 | AX-29454795  |
| BAG3   | rs55980078  | chr10:121,410,882-121,437,329 | AX-29454797  |
| BAG3   | rs11199060  | chr10:121,410,882-121,437,329 | AX-114338869 |
| BAG3   | rs196336    | chr10:121,410,882-121,437,329 | AX-38734997  |
| BAG3   | rs12250770  | chr10:121,410,882-121,437,329 | AX-29454809  |
| BAG3   | rs196337    | chr10:121,410,882-121,437,329 | AX-29454811  |
| BAG3   | rs72840788  | chr10:121,410,882-121,437,329 | AX-156279413 |
| BAG3   | rs72840788  | chr10:121,410,882-121,437,329 | AX-156295121 |
| BAG3   | rs12413642  | chr10:121,410,882-121,437,329 | AX-148072000 |
| BAG3   | rs196339    | chr10:121,410,882-121,437,329 | AX-156269215 |
| BAG3   | rs196340    | chr10:121,410,882-121,437,329 | AX-156269216 |
| BAG3   | rs196340    | chr10:121,410,882-121,437,329 | AX-156288739 |
| BAG3   | rs12571609  | chr10:121,410,882-121,437,329 | AX-29454819  |
| BAG3   | rs196341    | chr10:121,410,882-121,437,329 | AX-38735005  |
| BAG3   | rs3847489   | chr10:121,410,882-121,437,329 | AX-38735007  |
| BAG3   | rs196342    | chr10:121,410,882-121,437,329 | AX-38735009  |
| BAG3   | rs196343    | chr10:121,410,882-121,437,329 | AX-38735015  |
| BAG3   | rs7906577   | chr10:121,410,882-121,437,329 | AX-14988655  |
| BAG3   | rs11598594  | chr10:121,410,882-121,437,329 | AX-38735017  |
| BAG3   | rs7086437   | chr10:121,410,882-121,437,329 | AX-156269217 |
| BAG3   | rs7086437   | chr10:121,410,882-121,437,329 | AX-156288740 |
| BAG3   | rs196344    | chr10:121,410,882-121,437,329 | AX-156269218 |
| BAG3   | rs196344    | chr10:121,410,882-121,437,329 | AX-156288741 |
| BAG3   | rs17099139  | chr10:121,410,882-121,437,329 | AX-14988683  |
| BAG3   | rs125585    | chr10:121,410,882-121,437,329 | AX-148222155 |
| BAG3   | rs125585    | chr10:121,410,882-121,437,329 | AX-96552066  |
| BAG3   | rs3892879   | chr10:121,410,882-121,437,329 | AX-75165424  |
| BAG3   | rs196345    | chr10:121,410,882-121,437,329 | AX-11356356  |
| BAG3   | rs4752339   | chr10:121,410,882-121,437,329 | AX-156279414 |
| BAG3   | rs4752339   | chr10:121,410,882-121,437,329 | AX-156295122 |
| BAG3   | rs2577338   | chr10:121,410,882-121,437,329 | AX-156279415 |
| BAG3   | rs150785296 | chr10:121,410,882-121,437,329 | AX-120899331 |
| BAG3   | rs150785296 | chr10:121,410,882-121,437,329 | AX-88775186  |
| BAG3   | rs11597623  | chr10:121,410,882-121,437,329 | AX-38735025  |
| BAG3   | rs2478804   | chr10:121,410,882-121,437,329 | AX-11394198  |
| BAG3   | rs171909    | chr10:121,410,882-121,437,329 | AX-114075874 |
| BAG3   | rs171909    | chr10:121,410,882-121,437,329 | AX-156278504 |
| BAG3   | rs185504    | chr10:121,410,882-121,437,329 | AX-148706064 |
| BAG3   | rs2577339   | chr10:121,410,882-121,437,329 | AX-122632357 |
| BAG3   | rs2577339   | chr10:121,410,882-121,437,329 | AX-92741757  |
| BAG3   | rs145846357 | chr10:121,410,882-121,437,329 | AX-156285567 |
| BAG3   | rs61869036  | chr10:121,410,882-121,437,329 | AX-151352290 |
| BAG3   | rs17099142  | chr10:121,410,882-121,437,329 | AX-11305970  |
| BAG3   | rs7894233   | chr10:121,410,882-121,437,329 | AX-14988764  |
| BAG3   | rs196316    | chr10:121,410,882-121,437,329 | AX-156269219 |
| BAG3   | rs196316    | chr10:121,410,882-121,437,329 | AX-156288742 |
| BAG3   | rs7909225   | chr10:121,410,882-121,437,329 | AX-14988767  |
| BAG3   | rs12358294  | chr10:121,410,882-121,437,329 | AX-14988768  |
| BAG3   | rs201794358 | chr10:121,410,882-121,437,329 | AX-156285718 |
| BAG3   | rs201794358 | chr10:121,410,882-121,437,329 | AX-84771300  |

|      |             |                               |              |
|------|-------------|-------------------------------|--------------|
| BAG3 | rs117550412 | chr10:121,410,882-121,437,329 | AX-151352295 |
| BAG3 | rs117550412 | chr10:121,410,882-121,437,329 | AX-156269220 |
| BAG3 | rs2577340   | chr10:121,410,882-121,437,329 | AX-11399311  |
| BAG3 | ---         | chr10:121,410,882-121,437,329 | AX-156285455 |
| BAG3 | rs171910    | chr10:121,410,882-121,437,329 | AX-156269221 |
| BAG3 | rs171910    | chr10:121,410,882-121,437,329 | AX-156288743 |
| BAG3 | rs196318    | chr10:121,410,882-121,437,329 | AX-38735033  |
| BAG3 | rs11267763  | chr10:121,410,882-121,437,329 | AX-156284379 |
| BAG3 | rs196319    | chr10:121,410,882-121,437,329 | AX-105106414 |
| BAG3 | rs196320    | chr10:121,410,882-121,437,329 | AX-156288744 |
| BAG3 | rs7095308   | chr10:121,410,882-121,437,329 | AX-12620474  |
| BAG3 | rs11199063  | chr10:121,410,882-121,437,329 | AX-123081592 |
| BAG3 | rs11199063  | chr10:121,410,882-121,437,329 | AX-123081593 |
| BAG3 | rs17617337  | chr10:121,410,882-121,437,329 | AX-12501922  |
| BAG3 | rs10886529  | chr10:121,410,882-121,437,329 | AX-29454849  |
| BAG3 | rs196321    | chr10:121,410,882-121,437,329 | AX-29454851  |
| BAG3 | rs7099687   | chr10:121,410,882-121,437,329 | AX-38735037  |
| BAG3 | rs196322    | chr10:121,410,882-121,437,329 | AX-38735039  |
| BAG3 | rs4752340   | chr10:121,410,882-121,437,329 | AX-11523414  |
| BAG3 | rs196323    | chr10:121,410,882-121,437,329 | AX-29454853  |
| BAG3 | rs76040550  | chr10:121,410,882-121,437,329 | AX-60440441  |
| BAG3 | rs196325    | chr10:121,410,882-121,437,329 | AX-38735045  |
| BAG3 | rs2240777   | chr10:121,410,882-121,437,329 | AX-38735049  |
| BAG3 | rs387906874 | chr10:121,410,882-121,437,329 | AX-86577437  |
| BAG3 | rs35434411  | chr10:121,410,882-121,437,329 | AX-29454863  |
| BAG3 | ---         | chr10:121,410,882-121,437,329 | AX-90055336  |
| BAG3 | ---         | chr10:121,410,882-121,437,329 | AX-82917848  |
| BAG3 | ---         | chr10:121,410,882-121,437,329 | AX-90066008  |
| BAG3 | ---         | chr10:121,410,882-121,437,329 | AX-90061549  |
| BAG3 | rs387906875 | chr10:121,410,882-121,437,329 | AX-90026452  |
| BAG3 | rs2234962   | chr10:121,410,882-121,437,329 | AX-11377100  |
| BAG3 | rs196327    | chr10:121,410,882-121,437,329 | AX-29454865  |
| BAG3 | ---         | chr10:121,410,882-121,437,329 | AX-83084262  |
| BAG3 | rs121918312 | chr10:121,410,882-121,437,329 | AX-90040280  |
| BAG3 | ---         | chr10:121,410,882-121,437,329 | AX-90080924  |
| BAG3 | rs397514506 | chr10:121,410,882-121,437,329 | AX-86581118  |
| BAG3 | rs117671123 | chr10:121,410,882-121,437,329 | AX-83440281  |
| BAG3 | ---         | chr10:121,410,882-121,437,329 | AX-90080035  |
| BAG3 | ---         | chr10:121,410,882-121,437,329 | AX-90060850  |
| BAG3 | rs196328    | chr10:121,410,882-121,437,329 | AX-11356351  |
| BAG3 | rs2072361   | chr10:121,410,882-121,437,329 | AX-12516433  |
| BAG3 | rs196329    | chr10:121,410,882-121,437,329 | AX-12512319  |
| BAG3 | rs196330    | chr10:121,410,882-121,437,329 | AX-29454869  |
| BAG3 | rs3892668   | chr10:121,410,882-121,437,329 | AX-38735055  |
| BAG3 | rs35188721  | chr10:121,410,882-121,437,329 | AX-29454873  |
| BAG3 | rs196331    | chr10:121,410,882-121,437,329 | AX-156269225 |
| BAG3 | rs196331    | chr10:121,410,882-121,437,329 | AX-156288746 |
| BAG3 | rs196332    | chr10:121,410,882-121,437,329 | AX-38735057  |
| BAG3 | rs72842207  | chr10:121,410,882-121,437,329 | AX-29454877  |
| BAG3 | rs196333    | chr10:121,410,882-121,437,329 | AX-38735059  |
| BAG3 | rs196334    | chr10:121,410,882-121,437,329 | AX-29454879  |
| BAG3 | rs35060630  | chr10:121,410,882-121,437,329 | AX-119918573 |
| BAG3 | rs148952976 | chr10:121,410,882-121,437,329 | AX-156285402 |
| BAG3 | rs182954206 | chr10:121,410,882-121,437,329 | AX-148477583 |
| BAG3 | rs182954206 | chr10:121,410,882-121,437,329 | AX-156283659 |



|         |             |                               |              |
|---------|-------------|-------------------------------|--------------|
| BAG3    | rs186876032 | chr10:121,410,882-121,437,329 | AX-148651517 |
| BAG3    | rs186876032 | chr10:121,410,882-121,437,329 | AX-156283660 |
| BAG3    | rs139363651 | chr10:121,410,882-121,437,329 | AX-105087410 |
| BAG3    | rs139363651 | chr10:121,410,882-121,437,329 | AX-119866661 |
| BAG3    | rs113882598 | chr10:121,410,882-121,437,329 | AX-147984483 |
| BAG3    | rs113882598 | chr10:121,410,882-121,437,329 | AX-153799477 |
| BAG3    | rs12146226  | chr10:121,410,882-121,437,329 | AX-120368804 |
| BAG3    | rs12146226  | chr10:121,410,882-121,437,329 | AX-153804989 |
| BAG3    | rs12572016  | chr10:121,410,882-121,437,329 | AX-121895095 |
| BAG3    | rs12572016  | chr10:121,410,882-121,437,329 | AX-156279416 |
| BAG3    | rs196294    | chr10:121,410,882-121,437,329 | AX-156265649 |
| BAG3    | rs196294    | chr10:121,410,882-121,437,329 | AX-156265684 |
| BAG3    | ---         | chr10:121,410,882-121,437,329 | AX-90033111  |
| BAG3    | rs3858339   | chr10:121,410,882-121,437,329 | AX-14988972  |
| BAG3    | rs3858340   | chr10:121,410,882-121,437,329 | AX-83202757  |
| BAG3    | rs196295    | chr10:121,410,882-121,437,329 | AX-38735065  |
| BAG3    | rs397516881 | chr10:121,410,882-121,437,329 | AX-90031587  |
| BAG3    | rs397514507 | chr10:121,410,882-121,437,329 | AX-90060870  |
| BAG3    | ---         | chr10:121,410,882-121,437,329 | AX-90035141  |
| BAG3    | rs387906876 | chr10:121,410,882-121,437,329 | AX-90026453  |
| BAG3    | rs8946      | chr10:121,410,882-121,437,329 | AX-38735067  |
| BAG3    | rs71758126  | chr10:121,410,882-121,437,329 | AX-107864675 |
| BAG3    | rs59447464  | chr10:121,410,882-121,437,329 | AX-156298235 |
| BAG3    | rs200363755 | chr10:121,410,882-121,437,329 | AX-84758074  |
| BAG3    | rs200363755 | chr10:121,410,882-121,437,329 | AX-84758075  |
| BAG3    | rs11199065  | chr10:121,410,882-121,437,329 | AX-29454889  |
| BAG3    | rs57771257  | chr10:121,410,882-121,437,329 | AX-14989015  |
| BAG3    | rs57771257  | chr10:121,410,882-121,437,329 | AX-156297664 |
| CACNA1C | rs10848607  | chr12:2,162,416-2,807,115     | AX-30622253  |
| CACNA1C | rs71454851  | chr12:2,162,416-2,807,115     | AX-30622481  |
| CACNA1C | rs12318330  | chr12:2,162,416-2,807,115     | AX-30622533  |
| CACNA1C | rs56018122  | chr12:2,162,416-2,807,115     | AX-16895281  |
| CACNA1C | rs7972947   | chr12:2,162,416-2,807,115     | AX-11657168  |
| CACNA1C | rs11837432  | chr12:2,162,416-2,807,115     | AX-39358069  |
| CACNA1C | rs2238012   | chr12:2,162,416-2,807,115     | AX-11377435  |
| CACNA1C | rs7310591   | chr12:2,162,416-2,807,115     | AX-11620420  |
| CACNA1C | rs11062098  | chr12:2,162,416-2,807,115     | AX-39358153  |
| CACNA1C | rs2238014   | chr12:2,162,416-2,807,115     | AX-39358163  |
| CACNA1C | rs2238015   | chr12:2,162,416-2,807,115     | AX-11377436  |
| CACNA1C | rs4765884   | chr12:2,162,416-2,807,115     | AX-16895628  |
| CACNA1C | rs75616013  | chr12:2,162,416-2,807,115     | AX-16895653  |
| CACNA1C | rs2238018   | chr12:2,162,416-2,807,115     | AX-50105879  |
| CACNA1C | rs117492792 | chr12:2,162,416-2,807,115     | AX-16895765  |
| CACNA1C | rs2283276   | chr12:2,162,416-2,807,115     | AX-39358375  |
| CACNA1C | rs55966742  | chr12:2,162,416-2,807,115     | AX-16896299  |
| CACNA1C | rs11062110  | chr12:2,162,416-2,807,115     | AX-11141129  |
| CACNA1C | rs10774022  | chr12:2,162,416-2,807,115     | AX-11120703  |
| CACNA1C | rs35386560  | chr12:2,162,416-2,807,115     | AX-30624717  |
| CACNA1C | rs727268    | chr12:2,162,416-2,807,115     | AX-37571019  |
| CACNA1C | rs2283280   | chr12:2,162,416-2,807,115     | AX-39358833  |
| CACNA1C | rs6489349   | chr12:2,162,416-2,807,115     | AX-30625027  |
| CACNA1C | rs55724489  | chr12:2,162,416-2,807,115     | AX-30625665  |
| CACNA1C | rs78657525  | chr12:2,162,416-2,807,115     | AX-16897394  |
| CACNA1C | rs73048397  | chr12:2,162,416-2,807,115     | AX-30626043  |
| CACNA1C | rs34534613  | chr12:2,162,416-2,807,115     | AX-83563236  |

|                     |                           |             |
|---------------------|---------------------------|-------------|
| CACNA1C rs121912776 | chr12:2,162,416-2,807,115 | AX-88752786 |
| CACNA1C rs7297252   | chr12:2,162,416-2,807,115 | AX-39359245 |
| CACNA1C rs111520377 | chr12:2,162,416-2,807,115 | AX-16897770 |
| CACNA1C rs2239133   | chr12:2,162,416-2,807,115 | AX-39359367 |
| CACNA1C rs118114122 | chr12:2,162,416-2,807,115 | AX-30626541 |
| CACNA1C rs75557252  | chr12:2,162,416-2,807,115 | AX-30626579 |
| CACNA1C rs1122864   | chr12:2,162,416-2,807,115 | AX-16898085 |
| CACNA1C rs117233773 | chr12:2,162,416-2,807,115 | AX-16898501 |
| CACNA1C rs76328006  | chr12:2,162,416-2,807,115 | AX-30627709 |
| CACNA1C rs73050442  | chr12:2,162,416-2,807,115 | AX-16898999 |
| CACNA1C rs77574474  | chr12:2,162,416-2,807,115 | AX-16899140 |
| CACNA1C rs2238041   | chr12:2,162,416-2,807,115 | AX-11377441 |
| CACNA1C rs4765900   | chr12:2,162,416-2,807,115 | AX-30629527 |
| CACNA1C rs56197809  | chr12:2,162,416-2,807,115 | AX-30629685 |
| CACNA1C rs74062239  | chr12:2,162,416-2,807,115 | AX-30629711 |
| CACNA1C rs117224316 | chr12:2,162,416-2,807,115 | AX-16899818 |
| CACNA1C rs10774029  | chr12:2,162,416-2,807,115 | AX-39360869 |
| CACNA1C rs11062139  | chr12:2,162,416-2,807,115 | AX-50753929 |
| CACNA1C rs61909092  | chr12:2,162,416-2,807,115 | AX-50106505 |
| CACNA1C rs2239015   | chr12:2,162,416-2,807,115 | AX-11377532 |
| CACNA1C rs7298845   | chr12:2,162,416-2,807,115 | AX-11619600 |
| CACNA1C rs61909094  | chr12:2,162,416-2,807,115 | AX-16900251 |
| CACNA1C rs7953823   | chr12:2,162,416-2,807,115 | AX-12645685 |
| CACNA1C rs74238853  | chr12:2,162,416-2,807,115 | AX-30630551 |
| CACNA1C rs2239017   | chr12:2,162,416-2,807,115 | AX-16900429 |
| CACNA1C rs7303140   | chr12:2,162,416-2,807,115 | AX-39361367 |
| CACNA1C rs2283288   | chr12:2,162,416-2,807,115 | AX-39361597 |
| CACNA1C rs78557449  | chr12:2,162,416-2,807,115 | AX-30631639 |
| CACNA1C rs73033311  | chr12:2,162,416-2,807,115 | AX-51189938 |
| CACNA1C rs2239022   | chr12:2,162,416-2,807,115 | AX-30632099 |
| CACNA1C rs11062155  | chr12:2,162,416-2,807,115 | AX-39362231 |
| CACNA1C rs77372211  | chr12:2,162,416-2,807,115 | AX-16901372 |
| CACNA1C rs77893928  | chr12:2,162,416-2,807,115 | AX-16901912 |
| CACNA1C rs2239032   | chr12:2,162,416-2,807,115 | AX-39363085 |
| CACNA1C rs145942808 | chr12:2,162,416-2,807,115 | AX-90067681 |
| CACNA1C rs111361579 | chr12:2,162,416-2,807,115 | AX-90038797 |
| CACNA1C rs113937823 | chr12:2,162,416-2,807,115 | AX-90067683 |
| CACNA1C rs7313380   | chr12:2,162,416-2,807,115 | AX-39363103 |
| CACNA1C rs76618989  | chr12:2,162,416-2,807,115 | AX-16902064 |
| CACNA1C rs193242952 | chr12:2,162,416-2,807,115 | AX-90038799 |
| CACNA1C rs569801785 | chr12:2,162,416-2,807,115 | AX-90053051 |
| CACNA1C rs547084113 | chr12:2,162,416-2,807,115 | AX-90057076 |
| CACNA1C rs117899250 | chr12:2,162,416-2,807,115 | AX-61432177 |
| CACNA1C rs3794297   | chr12:2,162,416-2,807,115 | AX-11481121 |
| CACNA1C rs117433140 | chr12:2,162,416-2,807,115 | AX-16902137 |
| CACNA1C rs1006737   | chr12:2,162,416-2,807,115 | AX-11090634 |
| CACNA1C rs12370782  | chr12:2,162,416-2,807,115 | AX-55955297 |
| CACNA1C rs4765905   | chr12:2,162,416-2,807,115 | AX-39363485 |
| CACNA1C rs73033370  | chr12:2,162,416-2,807,115 | AX-30634627 |
| CACNA1C rs7975229   | chr12:2,162,416-2,807,115 | AX-30634809 |
| CACNA1C rs78006379  | chr12:2,162,416-2,807,115 | AX-16902592 |
| CACNA1C rs61907761  | chr12:2,162,416-2,807,115 | AX-30635053 |
| CACNA1C rs2283292   | chr12:2,162,416-2,807,115 | AX-39364147 |
| CACNA1C rs115481484 | chr12:2,162,416-2,807,115 | AX-16903137 |
| CACNA1C rs79122070  | chr12:2,162,416-2,807,115 | AX-16903202 |

|                     |                           |                 |
|---------------------|---------------------------|-----------------|
| CACNA1C rs74411248  | chr12:2,162,416-2,807,115 | AX-16903417     |
| CACNA1C rs61907778  | chr12:2,162,416-2,807,115 | AX-30636361     |
| CACNA1C rs75739143  | chr12:2,162,416-2,807,115 | AX-30637165     |
| CACNA1C rs79899792  | chr12:2,162,416-2,807,115 | AX-16903867     |
| CACNA1C rs56177308  | chr12:2,162,416-2,807,115 | AX-30637231     |
| CACNA1C rs73033382  | chr12:2,162,416-2,807,115 | AX-30637575     |
| CACNA1C rs75726475  | chr12:2,162,416-2,807,115 | AX-61434449     |
| CACNA1C rs4765913   | chr12:2,162,416-2,807,115 | AX-16904518     |
| CACNA1C rs2283293   | chr12:2,162,416-2,807,115 | AX-11381511     |
| CACNA1C rs2108570   | chr12:2,162,416-2,807,115 | AFFX-KIT-000131 |
| CACNA1C rs3819526   | chr12:2,162,416-2,807,115 | AX-39366299     |
| CACNA1C rs3819531   | chr12:2,162,416-2,807,115 | AX-30639227     |
| CACNA1C ---         | chr12:2,162,416-2,807,115 | AX-61435066     |
| CACNA1C rs11062188  | chr12:2,162,416-2,807,115 | AX-39366393     |
| CACNA1C rs1544503   | chr12:2,162,416-2,807,115 | AX-30639313     |
| CACNA1C rs7963869   | chr12:2,162,416-2,807,115 | AX-30639463     |
| CACNA1C rs57009736  | chr12:2,162,416-2,807,115 | AX-30639683     |
| CACNA1C ---         | chr12:2,162,416-2,807,115 | AX-39367021     |
| CACNA1C rs75784032  | chr12:2,162,416-2,807,115 | AX-37571167     |
| CACNA1C rs75559616  | chr12:2,162,416-2,807,115 | AX-30640255     |
| CACNA1C rs73035417  | chr12:2,162,416-2,807,115 | AX-30640273     |
| CACNA1C rs11062196  | chr12:2,162,416-2,807,115 | AX-39367207     |
| CACNA1C rs60656607  | chr12:2,162,416-2,807,115 | AX-30640511     |
| CACNA1C rs740418    | chr12:2,162,416-2,807,115 | AX-30640657     |
| CACNA1C rs2238076   | chr12:2,162,416-2,807,115 | AX-30640685     |
| CACNA1C rs116992907 | chr12:2,162,416-2,807,115 | AX-16906444     |
| CACNA1C rs11062203  | chr12:2,162,416-2,807,115 | AX-11141138     |
| CACNA1C rs12425203  | chr12:2,162,416-2,807,115 | AX-39367581     |
| CACNA1C rs886899    | chr12:2,162,416-2,807,115 | AX-30641557     |
| CACNA1C rs112653186 | chr12:2,162,416-2,807,115 | AX-30642663     |
| CACNA1C rs59241311  | chr12:2,162,416-2,807,115 | AX-30642917     |
| CACNA1C rs61907810  | chr12:2,162,416-2,807,115 | AX-30643137     |
| CACNA1C rs73037262  | chr12:2,162,416-2,807,115 | AX-30643191     |
| CACNA1C rs10774041  | chr12:2,162,416-2,807,115 | AX-30643291     |
| CACNA1C rs77663948  | chr12:2,162,416-2,807,115 | AX-16908190     |
| CACNA1C rs12823424  | chr12:2,162,416-2,807,115 | AX-11228320     |
| CACNA1C rs35407591  | chr12:2,162,416-2,807,115 | AX-39368941     |
| CACNA1C rs758116    | chr12:2,162,416-2,807,115 | AX-39369065     |
| CACNA1C rs112259837 | chr12:2,162,416-2,807,115 | AX-30643809     |
| CACNA1C rs11062222  | chr12:2,162,416-2,807,115 | AX-11141141     |
| CACNA1C rs11062223  | chr12:2,162,416-2,807,115 | AX-39369205     |
| CACNA1C rs1009281   | chr12:2,162,416-2,807,115 | AX-50108273     |
| CACNA1C rs73040095  | chr12:2,162,416-2,807,115 | AX-30644109     |
| CACNA1C rs994900    | chr12:2,162,416-2,807,115 | AX-50108312     |
| CACNA1C rs16929388  | chr12:2,162,416-2,807,115 | AX-11290583     |
| CACNA1C rs4765678   | chr12:2,162,416-2,807,115 | AX-39369531     |
| CACNA1C rs2239074   | chr12:2,162,416-2,807,115 | AX-11377541     |
| CACNA1C rs11613063  | chr12:2,162,416-2,807,115 | AX-11162477     |
| CACNA1C rs73042126  | chr12:2,162,416-2,807,115 | AX-30644903     |
| CACNA1C rs1860097   | chr12:2,162,416-2,807,115 | AX-11347427     |
| CACNA1C rs77768770  | chr12:2,162,416-2,807,115 | AX-30645089     |
| CACNA1C rs10774043  | chr12:2,162,416-2,807,115 | AX-39369881     |
| CACNA1C rs4765930   | chr12:2,162,416-2,807,115 | AX-39369923     |
| CACNA1C rs73042133  | chr12:2,162,416-2,807,115 | AX-30645309     |
| CACNA1C rs111915616 | chr12:2,162,416-2,807,115 | AX-30645363     |

|                     |                           |             |
|---------------------|---------------------------|-------------|
| CACNA1C rs17801205  | chr12:2,162,416-2,807,115 | AX-30645365 |
| CACNA1C rs16927947  | chr12:2,162,416-2,807,115 | AX-39370005 |
| CACNA1C rs111856877 | chr12:2,162,416-2,807,115 | AX-30645511 |
| CACNA1C rs2239078   | chr12:2,162,416-2,807,115 | AX-39370047 |
| CACNA1C rs1076346   | chr12:2,162,416-2,807,115 | AX-39370307 |
| CACNA1C rs2239080   | chr12:2,162,416-2,807,115 | AX-39370319 |
| CACNA1C rs1544514   | chr12:2,162,416-2,807,115 | AX-39370431 |
| CACNA1C rs1544515   | chr12:2,162,416-2,807,115 | AX-30646109 |
| CACNA1C rs117010860 | chr12:2,162,416-2,807,115 | AX-16909562 |
| CACNA1C rs2239081   | chr12:2,162,416-2,807,115 | AX-11377543 |
| CACNA1C rs7135609   | chr12:2,162,416-2,807,115 | AX-16909686 |
| CACNA1C rs61909374  | chr12:2,162,416-2,807,115 | AX-16909714 |
| CACNA1C rs10774049  | chr12:2,162,416-2,807,115 | AX-30646597 |
| CACNA1C rs11062236  | chr12:2,162,416-2,807,115 | AX-39370861 |
| CACNA1C rs73042174  | chr12:2,162,416-2,807,115 | AX-30647159 |
| CACNA1C rs16929447  | chr12:2,162,416-2,807,115 | AX-11290588 |
| CACNA1C rs2239084   | chr12:2,162,416-2,807,115 | AX-39371097 |
| CACNA1C rs61909380  | chr12:2,162,416-2,807,115 | AX-30647409 |
| CACNA1C rs11836925  | chr12:2,162,416-2,807,115 | AX-39371201 |
| CACNA1C rs182565355 | chr12:2,162,416-2,807,115 | AX-90038801 |
| CACNA1C rs61909383  | chr12:2,162,416-2,807,115 | AX-16910374 |
| CACNA1C rs11062241  | chr12:2,162,416-2,807,115 | AX-11141142 |
| CACNA1C rs2239087   | chr12:2,162,416-2,807,115 | AX-11377545 |
| CACNA1C rs11062242  | chr12:2,162,416-2,807,115 | AX-11141143 |
| CACNA1C rs1860095   | chr12:2,162,416-2,807,115 | AX-39371487 |
| CACNA1C rs61477807  | chr12:2,162,416-2,807,115 | AX-16910571 |
| CACNA1C rs201756421 | chr12:2,162,416-2,807,115 | AX-83084164 |
| CACNA1C rs2239090   | chr12:2,162,416-2,807,115 | AX-39371815 |
| CACNA1C rs7306916   | chr12:2,162,416-2,807,115 | AX-11620171 |
| CACNA1C rs73046231  | chr12:2,162,416-2,807,115 | AX-30649035 |
| CACNA1C rs1015287   | chr12:2,162,416-2,807,115 | AX-11096334 |
| CACNA1C rs12319670  | chr12:2,162,416-2,807,115 | AX-12433283 |
| CACNA1C rs16929482  | chr12:2,162,416-2,807,115 | AX-30649177 |
| CACNA1C rs16929486  | chr12:2,162,416-2,807,115 | AX-11290592 |
| CACNA1C rs1004207   | chr12:2,162,416-2,807,115 | AX-30649325 |
| CACNA1C rs73046238  | chr12:2,162,416-2,807,115 | AX-30649329 |
| CACNA1C rs79346899  | chr12:2,162,416-2,807,115 | AX-30649353 |
| CACNA1C rs2239095   | chr12:2,162,416-2,807,115 | AX-30649481 |
| CACNA1C rs77858125  | chr12:2,162,416-2,807,115 | AX-30649611 |
| CACNA1C rs17223925  | chr12:2,162,416-2,807,115 | AX-39372387 |
| CACNA1C ---         | chr12:2,162,416-2,807,115 | AX-37571247 |
| CACNA1C rs80315385  | chr12:2,162,416-2,807,115 | AX-88795801 |
| CACNA1C rs79891110  | chr12:2,162,416-2,807,115 | AX-90069400 |
| CACNA1C rs1860098   | chr12:2,162,416-2,807,115 | AX-30649913 |
| CACNA1C rs2239097   | chr12:2,162,416-2,807,115 | AX-11377547 |
| CACNA1C rs11062250  | chr12:2,162,416-2,807,115 | AX-39372695 |
| CACNA1C rs56343862  | chr12:2,162,416-2,807,115 | AX-30650283 |
| CACNA1C rs2239098   | chr12:2,162,416-2,807,115 | AX-30650433 |
| CACNA1C rs2239100   | chr12:2,162,416-2,807,115 | AX-30650463 |
| CACNA1C rs118020744 | chr12:2,162,416-2,807,115 | AX-30651073 |
| CACNA1C rs4765951   | chr12:2,162,416-2,807,115 | AX-39373187 |
| CACNA1C rs75392488  | chr12:2,162,416-2,807,115 | AX-30651145 |
| CACNA1C rs74481870  | chr12:2,162,416-2,807,115 | AX-30651189 |
| CACNA1C rs75933123  | chr12:2,162,416-2,807,115 | AX-30651203 |
| CACNA1C rs12231350  | chr12:2,162,416-2,807,115 | AX-12431078 |

|                     |                           |             |
|---------------------|---------------------------|-------------|
| CACNA1C rs2239114   | chr12:2,162,416-2,807,115 | AX-30652167 |
| CACNA1C rs73046287  | chr12:2,162,416-2,807,115 | AX-30652265 |
| CACNA1C rs12318263  | chr12:2,162,416-2,807,115 | AX-30652523 |
| CACNA1C rs77005317  | chr12:2,162,416-2,807,115 | AX-30652531 |
| CACNA1C rs121912775 | chr12:2,162,416-2,807,115 | AX-83443797 |
| CACNA1C rs148852483 | chr12:2,162,416-2,807,115 | AX-90038802 |
| CACNA1C rs192403768 | chr12:2,162,416-2,807,115 | AX-90067688 |
| CACNA1C rs2370597   | chr12:2,162,416-2,807,115 | AX-30653741 |
| CACNA1C rs2370600   | chr12:2,162,416-2,807,115 | AX-16912991 |
| CACNA1C rs538906614 | chr12:2,162,416-2,807,115 | AX-90029277 |
| CACNA1C rs79468509  | chr12:2,162,416-2,807,115 | AX-30654507 |
| CACNA1C rs75384169  | chr12:2,162,416-2,807,115 | AX-30654709 |
| CACNA1C rs10744566  | chr12:2,162,416-2,807,115 | AX-30654937 |
| CACNA1C rs117358463 | chr12:2,162,416-2,807,115 | AX-30654955 |
| CACNA1C rs1034937   | chr12:2,162,416-2,807,115 | AX-50723378 |
| CACNA1C rs11832738  | chr12:2,162,416-2,807,115 | AX-39375527 |
| CACNA1C rs215976    | chr12:2,162,416-2,807,115 | AX-39375647 |
| CACNA1C rs112532048 | chr12:2,162,416-2,807,115 | AX-83557311 |
| CACNA1C rs141030741 | chr12:2,162,416-2,807,115 | AX-83577141 |
| CACNA1C rs11062282  | chr12:2,162,416-2,807,115 | AX-39375765 |
| CACNA1C rs77189734  | chr12:2,162,416-2,807,115 | AX-30655885 |
| CACNA1C rs77802779  | chr12:2,162,416-2,807,115 | AX-16914611 |
| CACNA1C rs215979    | chr12:2,162,416-2,807,115 | AX-30656061 |
| CACNA1C rs56269265  | chr12:2,162,416-2,807,115 | AX-16914722 |
| CACNA1C rs79174814  | chr12:2,162,416-2,807,115 | AX-37571289 |
| CACNA1C rs111316465 | chr12:2,162,416-2,807,115 | AX-90067690 |
| CACNA1C rs758560    | chr12:2,162,416-2,807,115 | AX-11631643 |
| CACNA1C ---         | chr12:2,162,416-2,807,115 | AX-90064536 |
| CACNA1C rs215993    | chr12:2,162,416-2,807,115 | AX-39376511 |
| CACNA1C rs2239120   | chr12:2,162,416-2,807,115 | AX-30657057 |
| CACNA1C rs216008    | chr12:2,162,416-2,807,115 | AX-11371382 |
| CACNA1C rs2238091   | chr12:2,162,416-2,807,115 | AX-39376725 |
| CACNA1C rs2238092   | chr12:2,162,416-2,807,115 | AX-11377449 |
| CACNA1C rs11609212  | chr12:2,162,416-2,807,115 | AX-11162209 |
| CACNA1C rs2532614   | chr12:2,162,416-2,807,115 | AX-30657577 |
| CACNA1C rs216013    | chr12:2,162,416-2,807,115 | AX-11371389 |
| CACNA1C rs34935905  | chr12:2,162,416-2,807,115 | AX-11455496 |
| CACNA1C rs116790827 | chr12:2,162,416-2,807,115 | AX-16915594 |
| CACNA1C rs758563    | chr12:2,162,416-2,807,115 | AX-39377301 |
| CACNA1C rs11062287  | chr12:2,162,416-2,807,115 | AX-11141148 |
| CACNA1C rs12821981  | chr12:2,162,416-2,807,115 | AX-39377463 |
| CACNA1C rs11062288  | chr12:2,162,416-2,807,115 | AX-11141149 |
| CACNA1C rs2238096   | chr12:2,162,416-2,807,115 | AX-12522223 |
| CACNA1C rs2239124   | chr12:2,162,416-2,807,115 | AX-12522265 |
| CACNA1C rs117660151 | chr12:2,162,416-2,807,115 | AX-37571317 |
| CACNA1C rs216031    | chr12:2,162,416-2,807,115 | AX-39378003 |
| CACNA1C rs56180838  | chr12:2,162,416-2,807,115 | AX-30660265 |
| CACNA1C ---         | chr12:2,162,416-2,807,115 | AX-37571325 |
| CACNA1C rs2302728   | chr12:2,162,416-2,807,115 | AX-39378629 |
| CACNA1C ---         | chr12:2,162,416-2,807,115 | AX-90061547 |
| CACNA1C rs41276710  | chr12:2,162,416-2,807,115 | AX-16916903 |
| CACNA1C rs7295250   | chr12:2,162,416-2,807,115 | AX-16916960 |
| CACNA1C rs11062301  | chr12:2,162,416-2,807,115 | AX-39378683 |
| CACNA1C rs10744567  | chr12:2,162,416-2,807,115 | AX-39378869 |
| CACNA1C rs4765967   | chr12:2,162,416-2,807,115 | AX-39378945 |

|         |             |                               |             |
|---------|-------------|-------------------------------|-------------|
| CACNA1C | rs72552065  | chr12:2,162,416-2,807,115     | AX-30662239 |
| CACNA1C | rs374425919 | chr12:2,162,416-2,807,115     | AX-86732821 |
| CACNA1C | rs542995722 | chr12:2,162,416-2,807,115     | AX-86664321 |
| CACNA1C | rs10848683  | chr12:2,162,416-2,807,115     | AX-83206799 |
| CACNA1C | rs10774053  | chr12:2,162,416-2,807,115     | AX-83502864 |
| CACNA1C | ---         | chr12:2,162,416-2,807,115     | AX-90078808 |
| CACNA1C | rs201777030 | chr12:2,162,416-2,807,115     | AX-83358209 |
| CACNA1C | rs182208896 | chr12:2,162,416-2,807,115     | AX-83167753 |
| CACNA1C | rs185788586 | chr12:2,162,416-2,807,115     | AX-83203111 |
| CACNA1C | rs58010731  | chr12:2,162,416-2,807,115     | AX-30662893 |
| CACNA1C | rs201090446 | chr12:2,162,416-2,807,115     | AX-83471542 |
| CACNA1C | ---         | chr12:2,162,416-2,807,115     | AX-90056234 |
| CACNA1C | rs7957163   | chr12:2,162,416-2,807,115     | AX-11656039 |
| CAV3    | ---         | chr3:8,775,486-8,788,451      | AX-90075807 |
| CAV3    | rs1974763   | chr3:8,775,486-8,788,451      | AX-14399479 |
| CAV3    | ---         | chr3:8,775,486-8,788,451      | AX-90055867 |
| CAV3    | rs199476324 | chr3:8,775,486-8,788,451      | AX-88798926 |
| CAV3    | ---         | chr3:8,775,486-8,788,451      | AX-90055868 |
| CAV3    | rs116840782 | chr3:8,775,486-8,788,451      | AX-90041969 |
| CAV3    | rs116840785 | chr3:8,775,486-8,788,451      | AX-90041970 |
| CAV3    | ---         | chr3:8,775,486-8,788,451      | AX-90055869 |
| CAV3    | ---         | chr3:8,775,486-8,788,451      | AX-41301885 |
| CAV3    | rs116840787 | chr3:8,775,486-8,788,451      | AX-90041971 |
| CAV3    | rs1558991   | chr3:8,775,486-8,788,451      | AX-41301889 |
| CAV3    | rs73021987  | chr3:8,775,486-8,788,451      | AX-34451441 |
| CAV3    | rs237870    | chr3:8,775,486-8,788,451      | AX-41301949 |
| CAV3    | rs56112390  | chr3:8,775,486-8,788,451      | AX-34451581 |
| CAV3    | rs237879    | chr3:8,775,486-8,788,451      | AX-41302013 |
| CAV3    | rs116840788 | chr3:8,775,486-8,788,451      | AX-90070857 |
| CAV3    | ---         | chr3:8,775,486-8,788,451      | AX-90055870 |
| CAV3    | ---         | chr3:8,775,486-8,788,451      | AX-90055871 |
| CAV3    | rs116840793 | chr3:8,775,486-8,788,451      | AX-90041973 |
| CAV3    | rs199476327 | chr3:8,775,486-8,788,451      | AX-90042041 |
| CAV3    | rs199476328 | chr3:8,775,486-8,788,451      | AX-88798927 |
| CAV3    | rs116840794 | chr3:8,775,486-8,788,451      | AX-90041974 |
| CAV3    | rs72546667  | chr3:8,775,486-8,788,451      | AX-34451731 |
| CAV3    | rs116840795 | chr3:8,775,486-8,788,451      | AX-90041975 |
| CAV3    | rs116840796 | chr3:8,775,486-8,788,451      | AX-90041976 |
| CAV3    | rs116840800 | chr3:8,775,486-8,788,451      | AX-90053863 |
| CAV3    | rs199476332 | chr3:8,775,486-8,788,451      | AX-90042043 |
| CAV3    | rs121909280 | chr3:8,775,486-8,788,451      | AX-90041985 |
| CAV3    | rs199476333 | chr3:8,775,486-8,788,451      | AX-88798928 |
| CAV3    | rs116840776 | chr3:8,775,486-8,788,451      | AX-83482048 |
| CAV3    | rs199476334 | chr3:8,775,486-8,788,451      | AX-88755884 |
| CAV3    | rs121909282 | chr3:8,775,486-8,788,451      | AX-90070871 |
| CAV3    | rs104893715 | chr3:8,775,486-8,788,451      | AX-90041948 |
| CAV3    | rs28936685  | chr3:8,775,486-8,788,451      | AX-83201032 |
| CAV3    | ---         | chr3:8,775,486-8,788,451      | AX-90037922 |
| CAV3    | rs199476337 | chr3:8,775,486-8,788,451      | AX-88798930 |
| CAV3    | ---         | chr3:8,775,486-8,788,451      | AX-90044715 |
| CAV3    | rs116840805 | chr3:8,775,486-8,788,451      | AX-88755684 |
| CAV3    | rs104893713 | chr3:8,775,486-8,788,451      | AX-88755629 |
| CRYAB   | rs370803064 | chr11:111,779,350-111,782,473 | AX-86555447 |
| CRYAB   | rs141638421 | chr11:111,779,350-111,782,473 | AX-86663673 |
| CRYAB   | rs150516929 | chr11:111,779,350-111,782,473 | AX-83121827 |

|       |             |                               |              |
|-------|-------------|-------------------------------|--------------|
| CRYAB | rs104894202 | chr11:111,779,350-111,782,473 | AX-90069252  |
| CRYAB | ---         | chr11:111,779,350-111,782,473 | AX-90049428  |
| CRYAB | rs387907336 | chr11:111,779,350-111,782,473 | AX-90054649  |
| CRYAB | rs104894201 | chr11:111,779,350-111,782,473 | AX-90069207  |
| CRYAB | rs281865142 | chr11:111,779,350-111,782,473 | AX-86546262  |
| CRYAB | rs387907339 | chr11:111,779,350-111,782,473 | AX-90027568  |
| CRYAB | rs41302377  | chr11:111,779,350-111,782,473 | AX-11493712  |
| CRYAB | rs2070894   | chr11:111,779,350-111,782,473 | AX-38955309  |
| CRYAB | rs11603779  | chr11:111,779,350-111,782,473 | AX-38955311  |
| CRYAB | rs139750142 | chr11:111,779,350-111,782,473 | AX-90069330  |
| CRYAB | rs387907338 | chr11:111,779,350-111,782,473 | AX-90054650  |
| CRYAB | ---         | chr11:111,779,350-111,782,473 | AX-29854187  |
| CRYAB | rs2234704   | chr11:111,779,350-111,782,473 | AX-11377089  |
| CRYAB | rs281865141 | chr11:111,779,350-111,782,473 | AX-90042937  |
| CRYAB | rs387907337 | chr11:111,779,350-111,782,473 | AX-90058716  |
| CSRP3 | rs45584634  | chr11:19,203,577-19,232,118   | AX-11511242  |
| CSRP3 | rs45599440  | chr11:19,203,577-19,232,118   | AX-29981119  |
| CSRP3 | rs45549043  | chr11:19,203,577-19,232,118   | AX-29981127  |
| CSRP3 | rs72904149  | chr11:19,203,577-19,232,118   | AX-29981131  |
| CSRP3 | rs11025046  | chr11:19,203,577-19,232,118   | AX-113890034 |
| CSRP3 | rs11025046  | chr11:19,203,577-19,232,118   | AX-156265780 |
| CSRP3 | rs11025047  | chr11:19,203,577-19,232,118   | AX-148603579 |
| CSRP3 | rs11025047  | chr11:19,203,577-19,232,118   | AX-156265781 |
| CSRP3 | rs9888275   | chr11:19,203,577-19,232,118   | AX-156279657 |
| CSRP3 | rs9888275   | chr11:19,203,577-19,232,118   | AX-156295286 |
| CSRP3 | rs9888224   | chr11:19,203,577-19,232,118   | AX-147884629 |
| CSRP3 | rs9888226   | chr11:19,203,577-19,232,118   | AX-29981137  |
| CSRP3 | rs9888225   | chr11:19,203,577-19,232,118   | AX-11708543  |
| CSRP3 | rs9888227   | chr11:19,203,577-19,232,118   | AX-39021971  |
| CSRP3 | rs7130460   | chr11:19,203,577-19,232,118   | AX-11608742  |
| CSRP3 | rs7102888   | chr11:19,203,577-19,232,118   | AX-11606938  |
| CSRP3 | rs11025048  | chr11:19,203,577-19,232,118   | AX-11138669  |
| CSRP3 | rs2288251   | chr11:19,203,577-19,232,118   | AX-16550407  |
| CSRP3 | rs7103903   | chr11:19,203,577-19,232,118   | AX-39021977  |
| CSRP3 | rs76668953  | chr11:19,203,577-19,232,118   | AX-16550412  |
| CSRP3 | rs9888186   | chr11:19,203,577-19,232,118   | AX-16550413  |
| CSRP3 | rs11025049  | chr11:19,203,577-19,232,118   | AX-29981151  |
| CSRP3 | rs10833068  | chr11:19,203,577-19,232,118   | AX-29981153  |
| CSRP3 | rs10833069  | chr11:19,203,577-19,232,118   | AX-11125473  |
| CSRP3 | rs13451     | chr11:19,203,577-19,232,118   | AX-11254741  |
| CSRP3 | rs138218523 | chr11:19,203,577-19,232,118   | AX-83289750  |
| CSRP3 | rs1077688   | chr11:19,203,577-19,232,118   | AX-12395649  |
| CSRP3 | rs79400310  | chr11:19,203,577-19,232,118   | AX-16550417  |
| CSRP3 | rs3781799   | chr11:19,203,577-19,232,118   | AX-11480241  |
| CSRP3 | rs3781800   | chr11:19,203,577-19,232,118   | AX-29981169  |
| CSRP3 | rs1077687   | chr11:19,203,577-19,232,118   | AX-11120890  |
| CSRP3 | rs1077686   | chr11:19,203,577-19,232,118   | AX-29981171  |
| CSRP3 | rs10833070  | chr11:19,203,577-19,232,118   | AX-156265782 |
| CSRP3 | rs10833070  | chr11:19,203,577-19,232,118   | AX-156286507 |
| CSRP3 | rs10833071  | chr11:19,203,577-19,232,118   | AX-11125474  |
| CSRP3 | rs6483581   | chr11:19,203,577-19,232,118   | AX-11567278  |
| CSRP3 | ---         | chr11:19,203,577-19,232,118   | AX-86721715  |
| CSRP3 | rs137852764 | chr11:19,203,577-19,232,118   | AX-86611575  |
| CSRP3 | rs368392588 | chr11:19,203,577-19,232,118   | AX-86547908  |
| CSRP3 | rs104894204 | chr11:19,203,577-19,232,118   | AX-88752614  |

|       |             |                             |              |
|-------|-------------|-----------------------------|--------------|
| CSRP3 | rs7124801   | chr11:19,203,577-19,232,118 | AX-39021981  |
| CSRP3 | rs145300736 | chr11:19,203,577-19,232,118 | AX-86714984  |
| CSRP3 | rs137852765 | chr11:19,203,577-19,232,118 | AX-86713998  |
| CSRP3 | rs104894205 | chr11:19,203,577-19,232,118 | AX-88795660  |
| CSRP3 | ---         | chr11:19,203,577-19,232,118 | AX-90080578  |
| CSRP3 | rs2288250   | chr11:19,203,577-19,232,118 | AX-29981185  |
| CSRP3 | rs10766529  | chr11:19,203,577-19,232,118 | AX-29981187  |
| CSRP3 | rs10766530  | chr11:19,203,577-19,232,118 | AX-11120082  |
| CSRP3 | rs7128257   | chr11:19,203,577-19,232,118 | AX-156265783 |
| CSRP3 | rs7128257   | chr11:19,203,577-19,232,118 | AX-156286508 |
| CSRP3 | rs10766531  | chr11:19,203,577-19,232,118 | AX-29981193  |
| CSRP3 | rs10766532  | chr11:19,203,577-19,232,118 | AX-16550429  |
| CSRP3 | rs4757768   | chr11:19,203,577-19,232,118 | AX-29981199  |
| CSRP3 | rs7106581   | chr11:19,203,577-19,232,118 | AX-29981207  |
| CSRP3 | rs721067    | chr11:19,203,577-19,232,118 | AX-16550439  |
| CSRP3 | rs56384149  | chr11:19,203,577-19,232,118 | AX-16550440  |
| CSRP3 | rs10833072  | chr11:19,203,577-19,232,118 | AX-29981221  |
| CSRP3 | rs7933460   | chr11:19,203,577-19,232,118 | AX-16550448  |
| CSRP3 | rs7933466   | chr11:19,203,577-19,232,118 | AX-11654600  |
| CSRP3 | rs7933605   | chr11:19,203,577-19,232,118 | AX-29981229  |
| CSRP3 | rs45550635  | chr11:19,203,577-19,232,118 | AX-83584025  |
| CSRP3 | rs11025051  | chr11:19,203,577-19,232,118 | AX-29981233  |
| CSRP3 | rs12798277  | chr11:19,203,577-19,232,118 | AX-11227431  |
| CSRP3 | rs61876753  | chr11:19,203,577-19,232,118 | AX-29981237  |
| CSRP3 | rs112996135 | chr11:19,203,577-19,232,118 | AX-156265784 |
| CSRP3 | rs112996135 | chr11:19,203,577-19,232,118 | AX-156286509 |
| CSRP3 | rs55915915  | chr11:19,203,577-19,232,118 | AX-148350813 |
| CSRP3 | rs55915915  | chr11:19,203,577-19,232,118 | AX-156269986 |
| CSRP3 | rs58281741  | chr11:19,203,577-19,232,118 | AX-122343434 |
| CSRP3 | rs58281741  | chr11:19,203,577-19,232,118 | AX-156265785 |
| CSRP3 | rs12225248  | chr11:19,203,577-19,232,118 | AX-156265786 |
| CSRP3 | rs12225248  | chr11:19,203,577-19,232,118 | AX-156286510 |
| CSRP3 | rs11828825  | chr11:19,203,577-19,232,118 | AX-11177661  |
| CSRP3 | rs9804624   | chr11:19,203,577-19,232,118 | AX-148463984 |
| CSRP3 | rs9804624   | chr11:19,203,577-19,232,118 | AX-156265787 |
| CSRP3 | rs12290313  | chr11:19,203,577-19,232,118 | AX-39022003  |
| CSRP3 | rs12290229  | chr11:19,203,577-19,232,118 | AX-156265788 |
| CSRP3 | rs12290229  | chr11:19,203,577-19,232,118 | AX-156286511 |
| CSRP3 | rs7102081   | chr11:19,203,577-19,232,118 | AX-11606890  |
| CSRP3 | rs11025052  | chr11:19,203,577-19,232,118 | AX-16550465  |
| CSRP3 | rs10833073  | chr11:19,203,577-19,232,118 | AX-29981255  |
| CSRP3 | ---         | chr11:19,203,577-19,232,118 | AX-96583850  |
| CSRP3 | rs188131336 | chr11:19,203,577-19,232,118 | AX-11421524  |
| CSRP3 | rs28716481  | chr11:19,203,577-19,232,118 | AX-96904888  |
| CSRP3 | ---         | chr11:19,203,577-19,232,118 | AX-96560978  |
| CSRP3 | ---         | chr11:19,203,577-19,232,118 | AX-96928758  |
| CSRP3 | rs139942624 | chr11:19,203,577-19,232,118 | AX-105038362 |
| CSRP3 | rs139942624 | chr11:19,203,577-19,232,118 | AX-156283676 |
| CSRP3 | rs149825099 | chr11:19,203,577-19,232,118 | AX-148715939 |
| CSRP3 | rs144769994 | chr11:19,203,577-19,232,118 | AX-148721018 |
| CSRP3 | rs7951347   | chr11:19,203,577-19,232,118 | AX-156265789 |
| CSRP3 | rs7951347   | chr11:19,203,577-19,232,118 | AX-156286512 |
| CSRP3 | rs35236689  | chr11:19,203,577-19,232,118 | AX-11460553  |
| CSRP3 | rs66540504  | chr11:19,203,577-19,232,118 | AX-107760041 |
| CSRP3 | rs66540504  | chr11:19,203,577-19,232,118 | AX-156297687 |



|       |             |                              |              |
|-------|-------------|------------------------------|--------------|
| CSRP3 | rs11025054  | chr11:19,203,577-19,232,118  | AX-29981257  |
| CSRP3 | rs77055095  | chr11:19,203,577-19,232,118  | AX-29981261  |
| CSRP3 | rs12276811  | chr11:19,203,577-19,232,118  | AX-29981263  |
| CSRP3 | rs74896206  | chr11:19,203,577-19,232,118  | AX-16550476  |
| CSRP3 | rs77820686  | chr11:19,203,577-19,232,118  | AX-16550477  |
| CSRP3 | rs72904176  | chr11:19,203,577-19,232,118  | AX-29981267  |
| CSRP3 | rs1346117   | chr11:19,203,577-19,232,118  | AX-39022017  |
| CSRP3 | rs10741762  | chr11:19,203,577-19,232,118  | AX-16550479  |
| CSRP3 | rs75264737  | chr11:19,203,577-19,232,118  | AX-16550480  |
| CSRP3 | rs10766533  | chr11:19,203,577-19,232,118  | AX-16550483  |
| CSRP3 | rs10741763  | chr11:19,203,577-19,232,118  | AX-39022023  |
| CSRP3 | rs55646411  | chr11:19,203,577-19,232,118  | AX-113133775 |
| CSRP3 | rs55646411  | chr11:19,203,577-19,232,118  | AX-114063203 |
| CSRP3 | rs10766534  | chr11:19,203,577-19,232,118  | AX-11120083  |
| CSRP3 | rs10766535  | chr11:19,203,577-19,232,118  | AX-88733909  |
| CSRP3 | rs10766535  | chr11:19,203,577-19,232,118  | AX-88776954  |
| CSRP3 | rs10766536  | chr11:19,203,577-19,232,118  | AX-114098224 |
| CSRP3 | rs10741764  | chr11:19,203,577-19,232,118  | AX-29981289  |
| CSRP3 | rs11025055  | chr11:19,203,577-19,232,118  | AX-156265790 |
| CSRP3 | rs57725010  | chr11:19,203,577-19,232,118  | AX-16550494  |
| CSRP3 | rs7104244   | chr11:19,203,577-19,232,118  | AX-39022033  |
| CSRP3 | rs72904181  | chr11:19,203,577-19,232,118  | AX-16550499  |
| CSRP3 | rs11025056  | chr11:19,203,577-19,232,118  | AX-11138670  |
| CSRP3 | rs11025057  | chr11:19,203,577-19,232,118  | AX-11138671  |
| CSRP3 | rs11604807  | chr11:19,203,577-19,232,118  | AX-11161901  |
| CSRP3 | rs793279    | chr11:19,203,577-19,232,118  | AX-39022035  |
| CSRP3 | rs7112377   | chr11:19,203,577-19,232,118  | AX-39022037  |
| DES   | rs62636490  | chr2:220,283,099-220,291,461 | AX-88798310  |
| DES   | rs267607497 | chr2:220,283,099-220,291,461 | AX-90071579  |
| DES   | ---         | chr2:220,283,099-220,291,461 | AX-90072974  |
| DES   | rs267607499 | chr2:220,283,099-220,291,461 | AX-90055700  |
| DES   | ---         | chr2:220,283,099-220,291,461 | AX-90031525  |
| DES   | rs111548596 | chr2:220,283,099-220,291,461 | AX-96734049  |
| DES   | rs111548596 | chr2:220,283,099-220,291,461 | AX-97386147  |
| DES   | rs12991025  | chr2:220,283,099-220,291,461 | AX-33536297  |
| DES   | rs41272699  | chr2:220,283,099-220,291,461 | AX-40847343  |
| DES   | rs377337947 | chr2:220,283,099-220,291,461 | AX-86656733  |
| DES   | ---         | chr2:220,283,099-220,291,461 | AX-90028684  |
| DES   | rs267607484 | chr2:220,283,099-220,291,461 | AX-90057584  |
| DES   | ---         | chr2:220,283,099-220,291,461 | AX-90057067  |
| DES   | ---         | chr2:220,283,099-220,291,461 | AX-90044214  |
| DES   | ---         | chr2:220,283,099-220,291,461 | AX-90032852  |
| DES   | ---         | chr2:220,283,099-220,291,461 | AX-90051480  |
| DES   | rs397516698 | chr2:220,283,099-220,291,461 | AX-90057014  |
| DES   | rs267607483 | chr2:220,283,099-220,291,461 | AX-90029154  |
| DES   | rs41272701  | chr2:220,283,099-220,291,461 | AX-33536299  |
| DES   | ---         | chr2:220,283,099-220,291,461 | AX-90064091  |
| DES   | rs1058261   | chr2:220,283,099-220,291,461 | AX-13848347  |
| DES   | rs62636491  | chr2:220,283,099-220,291,461 | AX-86592544  |
| DES   | rs570056785 | chr2:220,283,099-220,291,461 | AX-90078716  |
| DES   | rs34337334  | chr2:220,283,099-220,291,461 | AX-83322569  |
| DES   | ---         | chr2:220,283,099-220,291,461 | AX-90041675  |
| DES   | rs57496341  | chr2:220,283,099-220,291,461 | AX-90033010  |
| DES   | rs12920     | chr2:220,283,099-220,291,461 | AX-40847345  |
| DES   | rs267607482 | chr2:220,283,099-220,291,461 | AX-90056485  |

|     |             |                              |              |
|-----|-------------|------------------------------|--------------|
| DES | rs57639980  | chr2:220,283,099-220,291,461 | AX-90070553  |
| DES | rs61368398  | chr2:220,283,099-220,291,461 | AX-90041678  |
| DES | rs58898021  | chr2:220,283,099-220,291,461 | AX-90070557  |
| DES | rs121913000 | chr2:220,283,099-220,291,461 | AX-90041829  |
| DES | ---         | chr2:220,283,099-220,291,461 | AX-90080671  |
| DES | rs62636494  | chr2:220,283,099-220,291,461 | AX-90041683  |
| DES | rs1058284   | chr2:220,283,099-220,291,461 | AX-11116618  |
| DES | ---         | chr2:220,283,099-220,291,461 | AX-90065883  |
| DES | rs57955682  | chr2:220,283,099-220,291,461 | AX-90041670  |
| DES | rs121913004 | chr2:220,283,099-220,291,461 | AX-90041666  |
| DES | rs62636493  | chr2:220,283,099-220,291,461 | AX-90041682  |
| DES | ---         | chr2:220,283,099-220,291,461 | AX-90041830  |
| DES | rs61130669  | chr2:220,283,099-220,291,461 | AX-90041677  |
| DES | rs57694264  | chr2:220,283,099-220,291,461 | AX-90070554  |
| DES | rs121913003 | chr2:220,283,099-220,291,461 | AX-90041679  |
| DES | rs2854895   | chr2:220,283,099-220,291,461 | AX-148092115 |
| DES | rs4674393   | chr2:220,283,099-220,291,461 | AX-33536307  |
| DES | rs72963600  | chr2:220,283,099-220,291,461 | AX-33536309  |
| DES | rs112203191 | chr2:220,283,099-220,291,461 | AX-96924364  |
| DES | rs112203191 | chr2:220,283,099-220,291,461 | AX-97463232  |
| DES | rs12621188  | chr2:220,283,099-220,291,461 | AX-33536319  |
| DES | rs62635763  | chr2:220,283,099-220,291,461 | AX-90059145  |
| DES | rs2854903   | chr2:220,283,099-220,291,461 | AX-13848350  |
| DES | rs10804273  | chr2:220,283,099-220,291,461 | AX-148300441 |
| DES | rs4674394   | chr2:220,283,099-220,291,461 | AX-96904764  |
| DES | rs4674394   | chr2:220,283,099-220,291,461 | AX-96928655  |
| DES | rs58898098  | chr2:220,283,099-220,291,461 | AX-33536333  |
| DES | ---         | chr2:220,283,099-220,291,461 | AX-90027722  |
| DES | rs121913005 | chr2:220,283,099-220,291,461 | AX-90070716  |
| DES | rs267607498 | chr2:220,283,099-220,291,461 | AX-90061566  |
| DES | ---         | chr2:220,283,099-220,291,461 | AX-90060570  |
| DES | rs267607485 | chr2:220,283,099-220,291,461 | AX-90063031  |
| DES | ---         | chr2:220,283,099-220,291,461 | AX-90026817  |
| DES | rs267607496 | chr2:220,283,099-220,291,461 | AX-90064321  |
| DES | rs73991549  | chr2:220,283,099-220,291,461 | AX-33536337  |
| DES | rs267607491 | chr2:220,283,099-220,291,461 | AX-90065291  |
| DES | rs267607487 | chr2:220,283,099-220,291,461 | AX-90055704  |
| DES | ---         | chr2:220,283,099-220,291,461 | AX-90059812  |
| DES | rs11685408  | chr2:220,283,099-220,291,461 | AX-123048664 |
| DES | rs11685408  | chr2:220,283,099-220,291,461 | AX-123048665 |
| DMD | rs16989352  | chrX:31,137,345-33,357,726   | AX-42750299  |
| DMD | ---         | chrX:31,137,345-33,357,726   | AX-90079083  |
| DMD | rs5927689   | chrX:31,137,345-33,357,726   | AX-16350243  |
| DMD | rs2170963   | chrX:31,137,345-33,357,726   | AX-11372240  |
| DMD | rs1484852   | chrX:31,137,345-33,357,726   | AX-11267966  |
| DMD | rs201217593 | chrX:31,137,345-33,357,726   | AX-86641226  |
| DMD | rs5927694   | chrX:31,137,345-33,357,726   | AX-11550838  |
| DMD | rs6631256   | chrX:31,137,345-33,357,726   | AX-11575604  |
| DMD | rs41312092  | chrX:31,137,345-33,357,726   | AX-37241203  |
| DMD | rs73462347  | chrX:31,137,345-33,357,726   | AX-37241209  |
| DMD | rs2178539   | chrX:31,137,345-33,357,726   | AX-12519927  |
| DMD | rs5972331   | chrX:31,137,345-33,357,726   | AX-37241217  |
| DMD | rs6631263   | chrX:31,137,345-33,357,726   | AX-16350280  |
| DMD | rs1317640   | chrX:31,137,345-33,357,726   | AX-11242977  |
| DMD | rs147083316 | chrX:31,137,345-33,357,726   | AX-38622815  |

|     |             |                            |             |
|-----|-------------|----------------------------|-------------|
| DMD | ---         | chrX:31,137,345-33,357,726 | AX-86629050 |
| DMD | rs141392048 | chrX:31,137,345-33,357,726 | AX-83159561 |
| DMD | rs2293668   | chrX:31,137,345-33,357,726 | AX-12524761 |
| DMD | rs10482232  | chrX:31,137,345-33,357,726 | AX-11108947 |
| DMD | rs73617055  | chrX:31,137,345-33,357,726 | AX-37241249 |
| DMD | rs12389409  | chrX:31,137,345-33,357,726 | AX-42750445 |
| DMD | rs5971552   | chrX:31,137,345-33,357,726 | AX-11553315 |
| DMD | rs2141755   | chrX:31,137,345-33,357,726 | AX-11369985 |
| DMD | rs5926996   | chrX:31,137,345-33,357,726 | AX-11550766 |
| DMD | rs5927708   | chrX:31,137,345-33,357,726 | AX-11550843 |
| DMD | rs7889559   | chrX:31,137,345-33,357,726 | AX-11652008 |
| DMD | rs5971553   | chrX:31,137,345-33,357,726 | AX-51290750 |
| DMD | rs12855949  | chrX:31,137,345-33,357,726 | AX-11229241 |
| DMD | rs1921381   | chrX:31,137,345-33,357,726 | AX-11352865 |
| DMD | rs5972341   | chrX:31,137,345-33,357,726 | AX-42750471 |
| DMD | rs77986513  | chrX:31,137,345-33,357,726 | AX-38521067 |
| DMD | rs10127097  | chrX:31,137,345-33,357,726 | AX-11094554 |
| DMD | rs2404500   | chrX:31,137,345-33,357,726 | AX-12528284 |
| DMD | rs12840452  | chrX:31,137,345-33,357,726 | AX-11228851 |
| DMD | rs5927001   | chrX:31,137,345-33,357,726 | AX-11550769 |
| DMD | rs1921396   | chrX:31,137,345-33,357,726 | AX-42750491 |
| DMD | rs12843613  | chrX:31,137,345-33,357,726 | AX-42750495 |
| DMD | rs5972346   | chrX:31,137,345-33,357,726 | AX-11553363 |
| DMD | rs56157001  | chrX:31,137,345-33,357,726 | AX-37241363 |
| DMD | rs1573952   | chrX:31,137,345-33,357,726 | AX-11276969 |
| DMD | rs17340630  | chrX:31,137,345-33,357,726 | AX-37241381 |
| DMD | rs17338423  | chrX:31,137,345-33,357,726 | AX-11320215 |
| DMD | rs12015000  | chrX:31,137,345-33,357,726 | AX-11186550 |
| DMD | rs189123449 | chrX:31,137,345-33,357,726 | AX-38622939 |
| DMD | rs138287985 | chrX:31,137,345-33,357,726 | AX-83125647 |
| DMD | rs151056989 | chrX:31,137,345-33,357,726 | AX-38622955 |
| DMD | rs146998764 | chrX:31,137,345-33,357,726 | AX-38622961 |
| DMD | rs55803048  | chrX:31,137,345-33,357,726 | AX-37241423 |
| DMD | rs139539984 | chrX:31,137,345-33,357,726 | AX-38622971 |
| DMD | rs5972363   | chrX:31,137,345-33,357,726 | AX-16350326 |
| DMD | rs11095206  | chrX:31,137,345-33,357,726 | AX-11143365 |
| DMD | rs5927716   | chrX:31,137,345-33,357,726 | AX-11550847 |
| DMD | rs12559712  | chrX:31,137,345-33,357,726 | AX-11214864 |
| DMD | rs1950114   | chrX:31,137,345-33,357,726 | AX-11355254 |
| DMD | rs2178537   | chrX:31,137,345-33,357,726 | AX-51282660 |
| DMD | rs12836134  | chrX:31,137,345-33,357,726 | AX-42750589 |
| DMD | rs12008262  | chrX:31,137,345-33,357,726 | AX-16350346 |
| DMD | rs138321724 | chrX:31,137,345-33,357,726 | AX-38623035 |
| DMD | rs12557091  | chrX:31,137,345-33,357,726 | AX-11214718 |
| DMD | rs5927721   | chrX:31,137,345-33,357,726 | AX-11550849 |
| DMD | rs12353755  | chrX:31,137,345-33,357,726 | AX-50801994 |
| DMD | rs12844827  | chrX:31,137,345-33,357,726 | AX-11228967 |
| DMD | rs5971568   | chrX:31,137,345-33,357,726 | AX-37241571 |
| DMD | rs5927726   | chrX:31,137,345-33,357,726 | AX-12592169 |
| DMD | rs142296114 | chrX:31,137,345-33,357,726 | AX-38623131 |
| DMD | rs5927012   | chrX:31,137,345-33,357,726 | AX-12592130 |
| DMD | rs2733459   | chrX:31,137,345-33,357,726 | AX-16350368 |
| DMD | rs2178618   | chrX:31,137,345-33,357,726 | AX-12519930 |
| DMD | rs61633449  | chrX:31,137,345-33,357,726 | AX-37241659 |
| DMD | rs2704904   | chrX:31,137,345-33,357,726 | AX-11406018 |

|     |             |                            |             |
|-----|-------------|----------------------------|-------------|
| DMD | rs2704908   | chrX:31,137,345-33,357,726 | AX-11406019 |
| DMD | rs2692984   | chrX:31,137,345-33,357,726 | AX-42750685 |
| DMD | rs16998181  | chrX:31,137,345-33,357,726 | AX-42750687 |
| DMD | rs7062234   | chrX:31,137,345-33,357,726 | AX-12619366 |
| DMD | rs2704909   | chrX:31,137,345-33,357,726 | AX-11406020 |
| DMD | rs17338507  | chrX:31,137,345-33,357,726 | AX-12498520 |
| DMD | rs2733466   | chrX:31,137,345-33,357,726 | AX-12536551 |
| DMD | rs6527086   | chrX:31,137,345-33,357,726 | AX-11569753 |
| DMD | rs1921968   | chrX:31,137,345-33,357,726 | AX-11352913 |
| DMD | rs7054748   | chrX:31,137,345-33,357,726 | AX-42750725 |
| DMD | rs17330006  | chrX:31,137,345-33,357,726 | AX-11319827 |
| DMD | rs17338535  | chrX:31,137,345-33,357,726 | AX-37241763 |
| DMD | rs4829222   | chrX:31,137,345-33,357,726 | AX-11529315 |
| DMD | rs1112432   | chrX:31,137,345-33,357,726 | AX-11145290 |
| DMD | rs7064141   | chrX:31,137,345-33,357,726 | AX-11604382 |
| DMD | rs17340798  | chrX:31,137,345-33,357,726 | AX-11320313 |
| DMD | rs12014023  | chrX:31,137,345-33,357,726 | AX-12425759 |
| DMD | rs59882236  | chrX:31,137,345-33,357,726 | AX-37241877 |
| DMD | rs1800280   | chrX:31,137,345-33,357,726 | AX-11344601 |
| DMD | rs1800278   | chrX:31,137,345-33,357,726 | AX-11344600 |
| DMD | rs41305353  | chrX:31,137,345-33,357,726 | AX-83535731 |
| DMD | rs128627256 | chrX:31,137,345-33,357,726 | AX-90042539 |
| DMD | rs17338604  | chrX:31,137,345-33,357,726 | AX-12498525 |
| DMD | rs6628610   | chrX:31,137,345-33,357,726 | AX-11575503 |
| DMD | rs16989681  | chrX:31,137,345-33,357,726 | AX-42750833 |
| DMD | rs116594347 | chrX:31,137,345-33,357,726 | AX-38521119 |
| DMD | rs5927762   | chrX:31,137,345-33,357,726 | AX-11550857 |
| DMD | rs5927017   | chrX:31,137,345-33,357,726 | AX-42750853 |
| DMD | rs5927764   | chrX:31,137,345-33,357,726 | AX-11550859 |
| DMD | rs7881088   | chrX:31,137,345-33,357,726 | AX-11651708 |
| DMD | rs5972404   | chrX:31,137,345-33,357,726 | AX-12593323 |
| DMD | rs17338611  | chrX:31,137,345-33,357,726 | AX-37242051 |
| DMD | rs5927779   | chrX:31,137,345-33,357,726 | AX-11550861 |
| DMD | rs716354    | chrX:31,137,345-33,357,726 | AX-11611227 |
| DMD | ---         | chrX:31,137,345-33,357,726 | AX-94359750 |
| DMD | rs112870072 | chrX:31,137,345-33,357,726 | AX-38623599 |
| DMD | rs34542798  | chrX:31,137,345-33,357,726 | AX-11448738 |
| DMD | rs62587358  | chrX:31,137,345-33,357,726 | AX-37242253 |
| DMD | rs5971586   | chrX:31,137,345-33,357,726 | AX-37242255 |
| DMD | rs1801188   | chrX:31,137,345-33,357,726 | AX-16350533 |
| DMD | rs73210126  | chrX:31,137,345-33,357,726 | AX-37242289 |
| DMD | rs5927030   | chrX:31,137,345-33,357,726 | AX-16350546 |
| DMD | rs1540705   | chrX:31,137,345-33,357,726 | AX-16350556 |
| DMD | rs17283259  | chrX:31,137,345-33,357,726 | AX-16350581 |
| DMD | rs766671    | chrX:31,137,345-33,357,726 | AX-16350584 |
| DMD | rs140658704 | chrX:31,137,345-33,357,726 | AX-38623703 |
| DMD | rs5927822   | chrX:31,137,345-33,357,726 | AX-11550867 |
| DMD | rs73210155  | chrX:31,137,345-33,357,726 | AX-37242407 |
| DMD | rs151244052 | chrX:31,137,345-33,357,726 | AX-83283778 |
| DMD | rs5927825   | chrX:31,137,345-33,357,726 | AX-11550868 |
| DMD | rs73210174  | chrX:31,137,345-33,357,726 | AX-37242463 |
| DMD | rs56678497  | chrX:31,137,345-33,357,726 | AX-37242465 |
| DMD | rs4433306   | chrX:31,137,345-33,357,726 | AX-12572140 |
| DMD | rs73213848  | chrX:31,137,345-33,357,726 | AX-37242479 |
| DMD | rs2646305   | chrX:31,137,345-33,357,726 | AX-16350600 |

|     |             |                            |             |
|-----|-------------|----------------------------|-------------|
| DMD | rs112041498 | chrX:31,137,345-33,357,726 | AX-38623737 |
| DMD | rs10521979  | chrX:31,137,345-33,357,726 | AX-11116224 |
| DMD | rs112516305 | chrX:31,137,345-33,357,726 | AX-16350608 |
| DMD | rs5972445   | chrX:31,137,345-33,357,726 | AX-11553372 |
| DMD | rs5927042   | chrX:31,137,345-33,357,726 | AX-16350620 |
| DMD | rs6628646   | chrX:31,137,345-33,357,726 | AX-12604531 |
| DMD | rs73213882  | chrX:31,137,345-33,357,726 | AX-37242649 |
| DMD | rs73464049  | chrX:31,137,345-33,357,726 | AX-37242701 |
| DMD | rs72466590  | chrX:31,137,345-33,357,726 | AX-83491701 |
| DMD | rs73619010  | chrX:31,137,345-33,357,726 | AX-37242707 |
| DMD | rs148452632 | chrX:31,137,345-33,357,726 | AX-38623813 |
| DMD | rs2952922   | chrX:31,137,345-33,357,726 | AX-16350656 |
| DMD | rs17341038  | chrX:31,137,345-33,357,726 | AX-11320320 |
| DMD | rs56279781  | chrX:31,137,345-33,357,726 | AX-37242789 |
| DMD | rs5972452   | chrX:31,137,345-33,357,726 | AX-12593328 |
| DMD | rs1800275   | chrX:31,137,345-33,357,726 | AX-11344598 |
| DMD | rs1545662   | chrX:31,137,345-33,357,726 | AX-42751255 |
| DMD | rs12557076  | chrX:31,137,345-33,357,726 | AX-42751261 |
| DMD | rs147024633 | chrX:31,137,345-33,357,726 | AX-69543356 |
| DMD | rs7052181   | chrX:31,137,345-33,357,726 | AX-11603957 |
| DMD | rs7892505   | chrX:31,137,345-33,357,726 | AX-11652117 |
| DMD | rs10521982  | chrX:31,137,345-33,357,726 | AX-16350683 |
| DMD | rs66520172  | chrX:31,137,345-33,357,726 | AX-37242865 |
| DMD | rs16998240  | chrX:31,137,345-33,357,726 | AX-11296687 |
| DMD | rs55787823  | chrX:31,137,345-33,357,726 | AX-37242897 |
| DMD | rs1463495   | chrX:31,137,345-33,357,726 | AX-16350695 |
| DMD | rs6527132   | chrX:31,137,345-33,357,726 | AX-11569755 |
| DMD | rs140820221 | chrX:31,137,345-33,357,726 | AX-38623953 |
| DMD | rs1350477   | chrX:31,137,345-33,357,726 | AX-12459142 |
| DMD | rs73619021  | chrX:31,137,345-33,357,726 | AX-37242949 |
| DMD | rs3761604   | chrX:31,137,345-33,357,726 | AX-12560331 |
| DMD | rs1800273   | chrX:31,137,345-33,357,726 | AX-11344597 |
| DMD | rs113404060 | chrX:31,137,345-33,357,726 | AX-38624041 |
| DMD | rs114484622 | chrX:31,137,345-33,357,726 | AX-38521259 |
| DMD | rs146890759 | chrX:31,137,345-33,357,726 | AX-38624069 |
| DMD | rs5972470   | chrX:31,137,345-33,357,726 | AX-11553384 |
| DMD | rs16990005  | chrX:31,137,345-33,357,726 | AX-11296079 |
| DMD | rs16990008  | chrX:31,137,345-33,357,726 | AX-42751385 |
| DMD | rs1293908   | chrX:31,137,345-33,357,726 | AX-11232980 |
| DMD | rs5972472   | chrX:31,137,345-33,357,726 | AX-11553385 |
| DMD | rs12007475  | chrX:31,137,345-33,357,726 | AX-42751399 |
| DMD | rs12014251  | chrX:31,137,345-33,357,726 | AX-42751403 |
| DMD | rs1293891   | chrX:31,137,345-33,357,726 | AX-11232972 |
| DMD | rs1293905   | chrX:31,137,345-33,357,726 | AX-42751417 |
| DMD | rs12010294  | chrX:31,137,345-33,357,726 | AX-11186419 |
| DMD | rs1293906   | chrX:31,137,345-33,357,726 | AX-11232979 |
| DMD | rs12008458  | chrX:31,137,345-33,357,726 | AX-42751425 |
| DMD | rs1293875   | chrX:31,137,345-33,357,726 | AX-37243081 |
| DMD | rs17270765  | chrX:31,137,345-33,357,726 | AX-42751455 |
| DMD | rs2253300   | chrX:31,137,345-33,357,726 | AX-11379020 |
| DMD | rs5927924   | chrX:31,137,345-33,357,726 | AX-11550887 |
| DMD | rs1293924   | chrX:31,137,345-33,357,726 | AX-16350765 |
| DMD | rs144824129 | chrX:31,137,345-33,357,726 | AX-38624163 |
| DMD | rs149058642 | chrX:31,137,345-33,357,726 | AX-38624173 |
| DMD | rs66707838  | chrX:31,137,345-33,357,726 | AX-16350775 |

|     |             |                            |             |
|-----|-------------|----------------------------|-------------|
| DMD | rs7054546   | chrX:31,137,345-33,357,726 | AX-16350777 |
| DMD | rs12556642  | chrX:31,137,345-33,357,726 | AX-37243155 |
| DMD | rs35992741  | chrX:31,137,345-33,357,726 | AX-37243161 |
| DMD | rs12842666  | chrX:31,137,345-33,357,726 | AX-11228911 |
| DMD | rs41469547  | chrX:31,137,345-33,357,726 | AX-42751491 |
| DMD | rs7059099   | chrX:31,137,345-33,357,726 | AX-11604200 |
| DMD | rs6631472   | chrX:31,137,345-33,357,726 | AX-11575629 |
| DMD | rs62589974  | chrX:31,137,345-33,357,726 | AX-37243173 |
| DMD | rs16998256  | chrX:31,137,345-33,357,726 | AX-11296689 |
| DMD | rs6418637   | chrX:31,137,345-33,357,726 | AX-11562950 |
| DMD | rs6628673   | chrX:31,137,345-33,357,726 | AX-42751497 |
| DMD | rs16998260  | chrX:31,137,345-33,357,726 | AX-11296690 |
| DMD | rs1718043   | chrX:31,137,345-33,357,726 | AX-11312706 |
| DMD | rs73619026  | chrX:31,137,345-33,357,726 | AX-37243225 |
| DMD | rs2141753   | chrX:31,137,345-33,357,726 | AX-11369984 |
| DMD | rs56663344  | chrX:31,137,345-33,357,726 | AX-37243239 |
| DMD | rs2897164   | chrX:31,137,345-33,357,726 | AX-11425634 |
| DMD | rs5972488   | chrX:31,137,345-33,357,726 | AX-11553387 |
| DMD | rs6631486   | chrX:31,137,345-33,357,726 | AX-11575631 |
| DMD | rs1795578   | chrX:31,137,345-33,357,726 | AX-11344345 |
| DMD | rs12840034  | chrX:31,137,345-33,357,726 | AX-11228840 |
| DMD | rs1718039   | chrX:31,137,345-33,357,726 | AX-11312700 |
| DMD | rs6631492   | chrX:31,137,345-33,357,726 | AX-11575633 |
| DMD | rs7882019   | chrX:31,137,345-33,357,726 | AX-11651736 |
| DMD | rs6653578   | chrX:31,137,345-33,357,726 | AX-12605048 |
| DMD | rs1795571   | chrX:31,137,345-33,357,726 | AX-16350810 |
| DMD | rs16990111  | chrX:31,137,345-33,357,726 | AX-11296095 |
| DMD | rs12843752  | chrX:31,137,345-33,357,726 | AX-50823730 |
| DMD | rs61549924  | chrX:31,137,345-33,357,726 | AX-37243277 |
| DMD | rs16990116  | chrX:31,137,345-33,357,726 | AX-11296097 |
| DMD | rs1718041   | chrX:31,137,345-33,357,726 | AX-11312702 |
| DMD | rs1795592   | chrX:31,137,345-33,357,726 | AX-11344348 |
| DMD | rs1795595   | chrX:31,137,345-33,357,726 | AX-11344351 |
| DMD | rs146532983 | chrX:31,137,345-33,357,726 | AX-38624337 |
| DMD | rs73219215  | chrX:31,137,345-33,357,726 | AX-37243297 |
| DMD | rs10127060  | chrX:31,137,345-33,357,726 | AX-11094552 |
| DMD | rs11095222  | chrX:31,137,345-33,357,726 | AX-11143368 |
| DMD | rs5927938   | chrX:31,137,345-33,357,726 | AX-11550890 |
| DMD | rs1317098   | chrX:31,137,345-33,357,726 | AX-11242732 |
| DMD | rs6628677   | chrX:31,137,345-33,357,726 | AX-12604533 |
| DMD | rs7065982   | chrX:31,137,345-33,357,726 | AX-11604466 |
| DMD | rs2701794   | chrX:31,137,345-33,357,726 | AX-11405790 |
| DMD | rs1795579   | chrX:31,137,345-33,357,726 | AX-11344346 |
| DMD | rs1718053   | chrX:31,137,345-33,357,726 | AX-11312713 |
| DMD | rs55672607  | chrX:31,137,345-33,357,726 | AX-37243385 |
| DMD | rs59399365  | chrX:31,137,345-33,357,726 | AX-37243391 |
| DMD | rs1718047   | chrX:31,137,345-33,357,726 | AX-11312709 |
| DMD | rs72626020  | chrX:31,137,345-33,357,726 | AX-37243417 |
| DMD | rs112141433 | chrX:31,137,345-33,357,726 | AX-16350840 |
| DMD | rs1795588   | chrX:31,137,345-33,357,726 | AX-11344347 |
| DMD | rs12833101  | chrX:31,137,345-33,357,726 | AX-11228674 |
| DMD | rs12560135  | chrX:31,137,345-33,357,726 | AX-11214891 |
| DMD | rs16990140  | chrX:31,137,345-33,357,726 | AX-11296101 |
| DMD | rs2606664   | chrX:31,137,345-33,357,726 | AX-11400918 |
| DMD | rs2685908   | chrX:31,137,345-33,357,726 | AX-11405022 |

|     |             |                            |             |
|-----|-------------|----------------------------|-------------|
| DMD | rs2606683   | chrX:31,137,345-33,357,726 | AX-11400925 |
| DMD | rs2685909   | chrX:31,137,345-33,357,726 | AX-11405023 |
| DMD | rs1456734   | chrX:31,137,345-33,357,726 | AX-11265333 |
| DMD | rs5927942   | chrX:31,137,345-33,357,726 | AX-12592181 |
| DMD | rs2685891   | chrX:31,137,345-33,357,726 | AX-11405015 |
| DMD | rs7879462   | chrX:31,137,345-33,357,726 | AX-11651651 |
| DMD | rs2685892   | chrX:31,137,345-33,357,726 | AX-12535012 |
| DMD | rs2606667   | chrX:31,137,345-33,357,726 | AX-11400920 |
| DMD | rs2685893   | chrX:31,137,345-33,357,726 | AX-37243483 |
| DMD | rs2606668   | chrX:31,137,345-33,357,726 | AX-37243485 |
| DMD | rs58151710  | chrX:31,137,345-33,357,726 | AX-37243493 |
| DMD | rs2685896   | chrX:31,137,345-33,357,726 | AX-11405016 |
| DMD | rs2606672   | chrX:31,137,345-33,357,726 | AX-11400922 |
| DMD | rs145272492 | chrX:31,137,345-33,357,726 | AX-38624445 |
| DMD | rs7058785   | chrX:31,137,345-33,357,726 | AX-37243511 |
| DMD | rs5972504   | chrX:31,137,345-33,357,726 | AX-11553390 |
| DMD | rs73458061  | chrX:31,137,345-33,357,726 | AX-37243513 |
| DMD | rs1456737   | chrX:31,137,345-33,357,726 | AX-42751629 |
| DMD | rs2685902   | chrX:31,137,345-33,357,726 | AX-11405019 |
| DMD | rs874830    | chrX:31,137,345-33,357,726 | AX-12653297 |
| DMD | rs2854966   | chrX:31,137,345-33,357,726 | AX-11419258 |
| DMD | rs55686834  | chrX:31,137,345-33,357,726 | AX-37243547 |
| DMD | rs331368    | chrX:31,137,345-33,357,726 | AX-11438214 |
| DMD | rs331362    | chrX:31,137,345-33,357,726 | AX-37243587 |
| DMD | rs61661964  | chrX:31,137,345-33,357,726 | AX-37243597 |
| DMD | rs143066970 | chrX:31,137,345-33,357,726 | AX-38624543 |
| DMD | rs111826558 | chrX:31,137,345-33,357,726 | AX-38624569 |
| DMD | rs966451    | chrX:31,137,345-33,357,726 | AX-16350886 |
| DMD | rs5927948   | chrX:31,137,345-33,357,726 | AX-11550891 |
| DMD | rs1456727   | chrX:31,137,345-33,357,726 | AX-11265330 |
| DMD | rs1456729   | chrX:31,137,345-33,357,726 | AX-42751699 |
| DMD | rs331349    | chrX:31,137,345-33,357,726 | AX-37243705 |
| DMD | rs12400794  | chrX:31,137,345-33,357,726 | AX-37243731 |
| DMD | rs1160301   | chrX:31,137,345-33,357,726 | AX-11161773 |
| DMD | rs1408983   | chrX:31,137,345-33,357,726 | AX-37243775 |
| DMD | rs331331    | chrX:31,137,345-33,357,726 | AX-11438205 |
| DMD | rs331323    | chrX:31,137,345-33,357,726 | AX-11438204 |
| DMD | rs62590662  | chrX:31,137,345-33,357,726 | AX-37243801 |
| DMD | rs331321    | chrX:31,137,345-33,357,726 | AX-11438202 |
| DMD | rs12007028  | chrX:31,137,345-33,357,726 | AX-37243817 |
| DMD | rs331318    | chrX:31,137,345-33,357,726 | AX-11438201 |
| DMD | rs331317    | chrX:31,137,345-33,357,726 | AX-11438200 |
| DMD | rs331316    | chrX:31,137,345-33,357,726 | AX-11438199 |
| DMD | rs189117    | chrX:31,137,345-33,357,726 | AX-11350753 |
| DMD | rs331313    | chrX:31,137,345-33,357,726 | AX-37243837 |
| DMD | rs115862380 | chrX:31,137,345-33,357,726 | AX-38521359 |
| DMD | rs5927966   | chrX:31,137,345-33,357,726 | AX-37243875 |
| DMD | rs143091919 | chrX:31,137,345-33,357,726 | AX-38624739 |
| DMD | rs2295329   | chrX:31,137,345-33,357,726 | AX-16350969 |
| DMD | rs1293821   | chrX:31,137,345-33,357,726 | AX-11232947 |
| DMD | rs5927972   | chrX:31,137,345-33,357,726 | AX-11550895 |
| DMD | rs5927974   | chrX:31,137,345-33,357,726 | AX-16350981 |
| DMD | rs1801187   | chrX:31,137,345-33,357,726 | AX-11344698 |
| DMD | ---         | chrX:31,137,345-33,357,726 | AX-59487755 |
| DMD | rs1963703   | chrX:31,137,345-33,357,726 | AX-37244003 |

|     |             |                            |             |
|-----|-------------|----------------------------|-------------|
| DMD | rs5972548   | chrX:31,137,345-33,357,726 | AX-16351002 |
| DMD | rs16990296  | chrX:31,137,345-33,357,726 | AX-16351017 |
| DMD | rs73619075  | chrX:31,137,345-33,357,726 | AX-37244131 |
| DMD | rs10521994  | chrX:31,137,345-33,357,726 | AX-16351052 |
| DMD | rs147474070 | chrX:31,137,345-33,357,726 | AX-83293608 |
| DMD | rs372444729 | chrX:31,137,345-33,357,726 | AX-86605601 |
| DMD | rs7053451   | chrX:31,137,345-33,357,726 | AX-11604001 |
| DMD | rs16990375  | chrX:31,137,345-33,357,726 | AX-16351089 |
| DMD | rs2405829   | chrX:31,137,345-33,357,726 | AX-11390020 |
| DMD | rs2076366   | chrX:31,137,345-33,357,726 | AX-12516630 |
| DMD | rs1800269   | chrX:31,137,345-33,357,726 | AX-83186220 |
| DMD | rs56027026  | chrX:31,137,345-33,357,726 | AX-37244275 |
| DMD | rs5972576   | chrX:31,137,345-33,357,726 | AX-37244281 |
| DMD | rs6527202   | chrX:31,137,345-33,357,726 | AX-42752017 |
| DMD | rs3827462   | chrX:31,137,345-33,357,726 | AX-42752033 |
| DMD | rs228390    | chrX:31,137,345-33,357,726 | AX-12524149 |
| DMD | rs72468667  | chrX:31,137,345-33,357,726 | AX-83516999 |
| DMD | rs228405    | chrX:31,137,345-33,357,726 | AX-12524159 |
| DMD | rs228406    | chrX:31,137,345-33,357,726 | AX-11381582 |
| DMD | rs72468681  | chrX:31,137,345-33,357,726 | AX-37244385 |
| DMD | rs228312    | chrX:31,137,345-33,357,726 | AX-42752071 |
| DMD | rs228324    | chrX:31,137,345-33,357,726 | AX-11381502 |
| DMD | rs228327    | chrX:31,137,345-33,357,726 | AX-12524111 |
| DMD | rs228336    | chrX:31,137,345-33,357,726 | AX-12524118 |
| DMD | rs5928002   | chrX:31,137,345-33,357,726 | AX-37244471 |
| DMD | rs228354    | chrX:31,137,345-33,357,726 | AX-12524131 |
| DMD | rs73207771  | chrX:31,137,345-33,357,726 | AX-37244501 |
| DMD | rs228355    | chrX:31,137,345-33,357,726 | AX-42752159 |
| DMD | rs10126490  | chrX:31,137,345-33,357,726 | AX-16351169 |
| DMD | rs228378    | chrX:31,137,345-33,357,726 | AX-11381555 |
| DMD | rs140474271 | chrX:31,137,345-33,357,726 | AX-38625135 |
| DMD | rs1435733   | chrX:31,137,345-33,357,726 | AX-11263359 |
| DMD | rs4829123   | chrX:31,137,345-33,357,726 | AX-11529304 |
| DMD | rs808578    | chrX:31,137,345-33,357,726 | AX-42752223 |
| DMD | rs808576    | chrX:31,137,345-33,357,726 | AX-11664668 |
| DMD | rs7057273   | chrX:31,137,345-33,357,726 | AX-11604133 |
| DMD | rs4829261   | chrX:31,137,345-33,357,726 | AX-11529323 |
| DMD | rs147822019 | chrX:31,137,345-33,357,726 | AX-83429594 |
| DMD | rs808573    | chrX:31,137,345-33,357,726 | AX-12650165 |
| DMD | rs373286166 | chrX:31,137,345-33,357,726 | AX-86603800 |
| DMD | rs370644567 | chrX:31,137,345-33,357,726 | AX-86686738 |
| DMD | rs5927083   | chrX:31,137,345-33,357,726 | AX-12592141 |
| DMD | rs5928027   | chrX:31,137,345-33,357,726 | AX-16351205 |
| DMD | rs808547    | chrX:31,137,345-33,357,726 | AX-16351217 |
| DMD | rs140340626 | chrX:31,137,345-33,357,726 | AX-83138089 |
| DMD | rs808536    | chrX:31,137,345-33,357,726 | AX-37244701 |
| DMD | rs5928040   | chrX:31,137,345-33,357,726 | AX-11550903 |
| DMD | rs808520    | chrX:31,137,345-33,357,726 | AX-11664624 |
| DMD | rs142762831 | chrX:31,137,345-33,357,726 | AX-38625259 |
| DMD | rs149352277 | chrX:31,137,345-33,357,726 | AX-38625261 |
| DMD | rs808513    | chrX:31,137,345-33,357,726 | AX-11664618 |
| DMD | rs57110381  | chrX:31,137,345-33,357,726 | AX-37244757 |
| DMD | rs5927089   | chrX:31,137,345-33,357,726 | AX-12592144 |
| DMD | rs5928062   | chrX:31,137,345-33,357,726 | AX-42752391 |
| DMD | rs1800266   | chrX:31,137,345-33,357,726 | AX-83006747 |



|     |             |                            |             |
|-----|-------------|----------------------------|-------------|
| DMD | rs57916323  | chrX:31,137,345-33,357,726 | AX-37244917 |
| DMD | rs112427626 | chrX:31,137,345-33,357,726 | AX-38625433 |
| DMD | rs5972643   | chrX:31,137,345-33,357,726 | AX-42752449 |
| DMD | rs5972644   | chrX:31,137,345-33,357,726 | AX-11553401 |
| DMD | rs5972645   | chrX:31,137,345-33,357,726 | AX-11553402 |
| DMD | ---         | chrX:31,137,345-33,357,726 | AX-37244987 |
| DMD | rs5928067   | chrX:31,137,345-33,357,726 | AX-11550906 |
| DMD | rs146155628 | chrX:31,137,345-33,357,726 | AX-38625483 |
| DMD | rs5928069   | chrX:31,137,345-33,357,726 | AX-37245029 |
| DMD | ---         | chrX:31,137,345-33,357,726 | AX-86589295 |
| DMD | rs1800265   | chrX:31,137,345-33,357,726 | AX-42752503 |
| DMD | ---         | chrX:31,137,345-33,357,726 | AX-90035334 |
| DMD | rs141379267 | chrX:31,137,345-33,357,726 | AX-38625581 |
| DMD | rs6653885   | chrX:31,137,345-33,357,726 | AX-37245177 |
| DMD | rs12116231  | chrX:31,137,345-33,357,726 | AX-12428588 |
| DMD | rs2748307   | chrX:31,137,345-33,357,726 | AX-12536874 |
| DMD | rs2748318   | chrX:31,137,345-33,357,726 | AX-42752595 |
| DMD | rs2855695   | chrX:31,137,345-33,357,726 | AX-37245221 |
| DMD | rs5972668   | chrX:31,137,345-33,357,726 | AX-16351343 |
| DMD | rs5928076   | chrX:31,137,345-33,357,726 | AX-37245237 |
| DMD | rs141199105 | chrX:31,137,345-33,357,726 | AX-38625665 |
| DMD | rs2855689   | chrX:31,137,345-33,357,726 | AX-12541998 |
| DMD | rs7067109   | chrX:31,137,345-33,357,726 | AX-11604514 |
| DMD | rs112382490 | chrX:31,137,345-33,357,726 | AX-38625703 |
| DMD | rs5927099   | chrX:31,137,345-33,357,726 | AX-37245311 |
| DMD | rs2855686   | chrX:31,137,345-33,357,726 | AX-42752655 |
| DMD | ---         | chrX:31,137,345-33,357,726 | AX-94376502 |
| DMD | rs1158629   | chrX:31,137,345-33,357,726 | AX-11160471 |
| DMD | ---         | chrX:31,137,345-33,357,726 | AX-94376503 |
| DMD | rs139319218 | chrX:31,137,345-33,357,726 | AX-38625769 |
| DMD | rs5928080   | chrX:31,137,345-33,357,726 | AX-11550909 |
| DMD | rs4829269   | chrX:31,137,345-33,357,726 | AX-51297334 |
| DMD | rs66760061  | chrX:31,137,345-33,357,726 | AX-37245393 |
| DMD | rs5972684   | chrX:31,137,345-33,357,726 | AX-12593340 |
| DMD | rs5928089   | chrX:31,137,345-33,357,726 | AX-11550910 |
| DMD | rs7879662   | chrX:31,137,345-33,357,726 | AX-11651658 |
| DMD | rs17283421  | chrX:31,137,345-33,357,726 | AX-16351390 |
| DMD | rs5972690   | chrX:31,137,345-33,357,726 | AX-11553410 |
| DMD | rs3764763   | chrX:31,137,345-33,357,726 | AX-11478981 |
| DMD | rs7880016   | chrX:31,137,345-33,357,726 | AX-11651676 |
| DMD | rs5972699   | chrX:31,137,345-33,357,726 | AX-12593341 |
| DMD | rs9887516   | chrX:31,137,345-33,357,726 | AX-11708518 |
| DMD | rs5928095   | chrX:31,137,345-33,357,726 | AX-11550913 |
| DMD | rs5005249   | chrX:31,137,345-33,357,726 | AX-16351405 |
| DMD | rs5928099   | chrX:31,137,345-33,357,726 | AX-16351408 |
| DMD | rs12395380  | chrX:31,137,345-33,357,726 | AX-11203446 |
| DMD | rs12559198  | chrX:31,137,345-33,357,726 | AX-11214832 |
| DMD | rs17338877  | chrX:31,137,345-33,357,726 | AX-12498528 |
| DMD | rs7061782   | chrX:31,137,345-33,357,726 | AX-11604290 |
| DMD | rs5928102   | chrX:31,137,345-33,357,726 | AX-11550914 |
| DMD | rs6628748   | chrX:31,137,345-33,357,726 | AX-11575514 |
| DMD | rs5928104   | chrX:31,137,345-33,357,726 | AX-12592199 |
| DMD | rs17338898  | chrX:31,137,345-33,357,726 | AX-16351435 |
| DMD | rs5928109   | chrX:31,137,345-33,357,726 | AX-16351441 |
| DMD | rs67636309  | chrX:31,137,345-33,357,726 | AX-37245605 |

|     |             |                            |             |
|-----|-------------|----------------------------|-------------|
| DMD | rs5928111   | chrX:31,137,345-33,357,726 | AX-11550916 |
| DMD | rs1321394   | chrX:31,137,345-33,357,726 | AX-11244660 |
| DMD | rs1321395   | chrX:31,137,345-33,357,726 | AX-12454033 |
| DMD | rs17330215  | chrX:31,137,345-33,357,726 | AX-37245633 |
| DMD | rs10522017  | chrX:31,137,345-33,357,726 | AX-11116233 |
| DMD | rs6628752   | chrX:31,137,345-33,357,726 | AX-42752791 |
| DMD | rs1570029   | chrX:31,137,345-33,357,726 | AX-12470120 |
| DMD | rs5927113   | chrX:31,137,345-33,357,726 | AX-11550788 |
| DMD | rs5972715   | chrX:31,137,345-33,357,726 | AX-37245685 |
| DMD | rs113605304 | chrX:31,137,345-33,357,726 | AX-16351459 |
| DMD | rs73466863  | chrX:31,137,345-33,357,726 | AX-37245711 |
| DMD | rs2180648   | chrX:31,137,345-33,357,726 | AX-11372994 |
| DMD | rs5972721   | chrX:31,137,345-33,357,726 | AX-16351479 |
| DMD | rs6527243   | chrX:31,137,345-33,357,726 | AX-12601571 |
| DMD | rs55790705  | chrX:31,137,345-33,357,726 | AX-37245817 |
| DMD | rs6628755   | chrX:31,137,345-33,357,726 | AX-16351491 |
| DMD | rs4639663   | chrX:31,137,345-33,357,726 | AX-11514707 |
| DMD | rs7886739   | chrX:31,137,345-33,357,726 | AX-16351507 |
| DMD | rs6631712   | chrX:31,137,345-33,357,726 | AX-16351515 |
| DMD | rs4345727   | chrX:31,137,345-33,357,726 | AX-11502012 |
| DMD | rs5972737   | chrX:31,137,345-33,357,726 | AX-11553417 |
| DMD | rs2765379   | chrX:31,137,345-33,357,726 | AX-11409504 |
| DMD | rs5972739   | chrX:31,137,345-33,357,726 | AX-37246019 |
| DMD | rs2765381   | chrX:31,137,345-33,357,726 | AX-11409505 |
| DMD | rs59903175  | chrX:31,137,345-33,357,726 | AX-37246033 |
| DMD | rs143027254 | chrX:31,137,345-33,357,726 | AX-38626199 |
| DMD | rs73188288  | chrX:31,137,345-33,357,726 | AX-37246061 |
| DMD | rs6631726   | chrX:31,137,345-33,357,726 | AX-11575642 |
| DMD | rs2765387   | chrX:31,137,345-33,357,726 | AX-16351553 |
| DMD | rs6631731   | chrX:31,137,345-33,357,726 | AX-12604616 |
| DMD | rs5972743   | chrX:31,137,345-33,357,726 | AX-42753017 |
| DMD | rs6418647   | chrX:31,137,345-33,357,726 | AX-11562951 |
| DMD | rs5928167   | chrX:31,137,345-33,357,726 | AX-11550924 |
| DMD | rs72626075  | chrX:31,137,345-33,357,726 | AX-16351569 |
| DMD | rs2094147   | chrX:31,137,345-33,357,726 | AX-42753075 |
| DMD | rs2207086   | chrX:31,137,345-33,357,726 | AX-37246201 |
| DMD | rs7064140   | chrX:31,137,345-33,357,726 | AX-16351601 |
| DMD | rs2024614   | chrX:31,137,345-33,357,726 | AX-11360633 |
| DMD | rs10127390  | chrX:31,137,345-33,357,726 | AX-37246331 |
| DMD | rs5972769   | chrX:31,137,345-33,357,726 | AX-11553420 |
| DMD | rs5928193   | chrX:31,137,345-33,357,726 | AX-11550929 |
| DMD | rs5928201   | chrX:31,137,345-33,357,726 | AX-16351654 |
| DMD | rs150494081 | chrX:31,137,345-33,357,726 | AX-38626449 |
| DMD | rs5928207   | chrX:31,137,345-33,357,726 | AX-42753213 |
| DMD | rs62591018  | chrX:31,137,345-33,357,726 | AX-37246517 |
| DMD | rs12392440  | chrX:31,137,345-33,357,726 | AX-11203395 |
| DMD | rs72626080  | chrX:31,137,345-33,357,726 | AX-37246595 |
| DMD | rs2050074   | chrX:31,137,345-33,357,726 | AX-11363222 |
| DMD | rs2050076   | chrX:31,137,345-33,357,726 | AX-37246597 |
| DMD | rs12396164  | chrX:31,137,345-33,357,726 | AX-11203460 |
| DMD | rs61142109  | chrX:31,137,345-33,357,726 | AX-37246627 |
| DMD | rs5972802   | chrX:31,137,345-33,357,726 | AX-11553424 |
| DMD | rs5972805   | chrX:31,137,345-33,357,726 | AX-11553425 |
| DMD | rs12559939  | chrX:31,137,345-33,357,726 | AX-42753275 |
| DMD | rs3946125   | chrX:31,137,345-33,357,726 | AX-42753279 |

|      |             |                             |             |
|------|-------------|-----------------------------|-------------|
| DMD  | rs141927233 | chrX:31,137,345-33,357,726  | AX-38626571 |
| DMD  | rs73623943  | chrX:31,137,345-33,357,726  | AX-16351731 |
| DMD  | rs5972815   | chrX:31,137,345-33,357,726  | AX-11553427 |
| DMD  | rs17341316  | chrX:31,137,345-33,357,726  | AX-11320333 |
| DMD  | rs58029094  | chrX:31,137,345-33,357,726  | AX-16351753 |
| DSC2 | rs200056085 | chr18:28,645,942-28,682,388 | AX-83241216 |
| DSC2 | ---         | chr18:28,645,942-28,682,388 | AX-94364075 |
| DSC2 | rs143342988 | chr18:28,645,942-28,682,388 | AX-83035166 |
| DSC2 | rs141873745 | chr18:28,645,942-28,682,388 | AX-92009411 |
| DSC2 | rs147109895 | chr18:28,645,942-28,682,388 | AX-83116253 |
| DSC2 | ---         | chr18:28,645,942-28,682,388 | AX-90029836 |
| DSC2 | rs370325533 | chr18:28,645,942-28,682,388 | AX-91989192 |
| DSC2 | rs142410803 | chr18:28,645,942-28,682,388 | AX-94350052 |
| DSC2 | ---         | chr18:28,645,942-28,682,388 | AX-94362747 |
| DSC2 | rs143413607 | chr18:28,645,942-28,682,388 | AX-83417692 |
| DSC2 | rs200197897 | chr18:28,645,942-28,682,388 | AX-94350053 |
| DSC2 | ---         | chr18:28,645,942-28,682,388 | AX-37822253 |
| DSC2 | ---         | chr18:28,645,942-28,682,388 | AX-94376966 |
| DSC2 | rs1617629   | chr18:28,645,942-28,682,388 | AX-92010094 |
| DSC2 | ---         | chr18:28,645,942-28,682,388 | AX-94376967 |
| DSC2 | rs377272752 | chr18:28,645,942-28,682,388 | AX-83310104 |
| DSC2 | ---         | chr18:28,645,942-28,682,388 | AX-91997384 |
| DSC2 | ---         | chr18:28,645,942-28,682,388 | AX-91998086 |
| DSC2 | rs1893963   | chr18:28,645,942-28,682,388 | AX-11351031 |
| DSC2 | rs549251334 | chr18:28,645,942-28,682,388 | AX-94376968 |
| DSC2 | rs151024019 | chr18:28,645,942-28,682,388 | AX-82948638 |
| DSC2 | ---         | chr18:28,645,942-28,682,388 | AX-94376969 |
| DSC2 | ---         | chr18:28,645,942-28,682,388 | AX-90077026 |
| DSC2 | rs147742157 | chr18:28,645,942-28,682,388 | AX-83118879 |
| DSC2 | rs4799304   | chr18:28,645,942-28,682,388 | AX-40291185 |
| DSC2 | rs397514043 | chr18:28,645,942-28,682,388 | AX-90076806 |
| DSC2 | ---         | chr18:28,645,942-28,682,388 | AX-94376970 |
| DSC2 | ---         | chr18:28,645,942-28,682,388 | AX-90062073 |
| DSC2 | ---         | chr18:28,645,942-28,682,388 | AX-90060810 |
| DSC2 | rs148185335 | chr18:28,645,942-28,682,388 | AX-83362316 |
| DSC2 | rs140232809 | chr18:28,645,942-28,682,388 | AX-83411190 |
| DSC2 | rs201845641 | chr18:28,645,942-28,682,388 | AX-83136981 |
| DSC2 | rs150318400 | chr18:28,645,942-28,682,388 | AX-83595186 |
| DSC2 | rs10084050  | chr18:28,645,942-28,682,388 | AX-11091635 |
| DSC2 | ---         | chr18:28,645,942-28,682,388 | AX-94379498 |
| DSC2 | rs397514041 | chr18:28,645,942-28,682,388 | AX-90071521 |
| DSC2 | rs144242114 | chr18:28,645,942-28,682,388 | AX-92010028 |
| DSC2 | ---         | chr18:28,645,942-28,682,388 | AX-94362749 |
| DSC2 | ---         | chr18:28,645,942-28,682,388 | AX-94379500 |
| DSC2 | ---         | chr18:28,645,942-28,682,388 | AX-94362751 |
| DSC2 | ---         | chr18:28,645,942-28,682,388 | AX-94379502 |
| DSC2 | ---         | chr18:28,645,942-28,682,388 | AX-90078050 |
| DSC2 | rs139399951 | chr18:28,645,942-28,682,388 | AX-83387887 |
| DSC2 | ---         | chr18:28,645,942-28,682,388 | AX-90026250 |
| DSC2 | rs368299411 | chr18:28,645,942-28,682,388 | AX-86659072 |
| DSC2 | rs35717505  | chr18:28,645,942-28,682,388 | AX-83367721 |
| DSC2 | ---         | chr18:28,645,942-28,682,388 | AX-94379503 |
| DSC2 | rs145560678 | chr18:28,645,942-28,682,388 | AX-82986464 |
| DSC2 | ---         | chr18:28,645,942-28,682,388 | AX-94379505 |
| DSC2 | rs200802591 | chr18:28,645,942-28,682,388 | AX-92007862 |

|      |             |                             |             |
|------|-------------|-----------------------------|-------------|
| DSC2 | ---         | chr18:28,645,942-28,682,388 | AX-90026251 |
| DSC2 | rs373201722 | chr18:28,645,942-28,682,388 | AX-94379506 |
| DSC2 | ---         | chr18:28,645,942-28,682,388 | AX-90048252 |
| DSC2 | ---         | chr18:28,645,942-28,682,388 | AX-94379507 |
| DSC2 | rs397514042 | chr18:28,645,942-28,682,388 | AX-90034283 |
| DSC2 | ---         | chr18:28,645,942-28,682,388 | AX-94362758 |
| DSC2 | ---         | chr18:28,645,942-28,682,388 | AX-90029043 |
| DSC2 | rs142331975 | chr18:28,645,942-28,682,388 | AX-88754523 |
| DSC2 | ---         | chr18:28,645,942-28,682,388 | AX-94362759 |
| DSC2 | ---         | chr18:28,645,942-28,682,388 | AX-90026253 |
| DSC2 | ---         | chr18:28,645,942-28,682,388 | AX-86555619 |
| DSC2 | rs373305929 | chr18:28,645,942-28,682,388 | AX-91983978 |
| DSC2 | rs144799937 | chr18:28,645,942-28,682,388 | AX-82978325 |
| DSC2 | ---         | chr18:28,645,942-28,682,388 | AX-94379510 |
| DSC2 | rs138749562 | chr18:28,645,942-28,682,388 | AX-83287256 |
| DSC2 | rs180908546 | chr18:28,645,942-28,682,388 | AX-83249840 |
| DSC2 | ---         | chr18:28,645,942-28,682,388 | AX-94380933 |
| DSC2 | rs12954874  | chr18:28,645,942-28,682,388 | AX-12449745 |
| DSC2 | rs397517408 | chr18:28,645,942-28,682,388 | AX-90080326 |
| DSC2 | rs17799852  | chr18:28,645,942-28,682,388 | AX-11340932 |
| DSC2 | ---         | chr18:28,645,942-28,682,388 | AX-94362761 |
| DSC2 | ---         | chr18:28,645,942-28,682,388 | AX-90060259 |
| DSG2 | ---         | chr18:29,078,027-29,128,814 | AX-90055676 |
| DSG2 | rs368809971 | chr18:29,078,027-29,128,814 | AX-92015941 |
| DSG2 | rs372174546 | chr18:29,078,027-29,128,814 | AX-91992207 |
| DSG2 | rs117873584 | chr18:29,078,027-29,128,814 | AX-13286717 |
| DSG2 | rs1460602   | chr18:29,078,027-29,128,814 | AX-40292119 |
| DSG2 | rs8093731   | chr18:29,078,027-29,128,814 | AX-11665253 |
| DSG2 | ---         | chr18:29,078,027-29,128,814 | AX-94379512 |
| DSG2 | ---         | chr18:29,078,027-29,128,814 | AX-90055677 |
| DSG2 | rs121913008 | chr18:29,078,027-29,128,814 | AX-88797546 |
| DSG2 | rs121913006 | chr18:29,078,027-29,128,814 | AX-88797544 |
| DSG2 | ---         | chr18:29,078,027-29,128,814 | AX-94362763 |
| DSG2 | ---         | chr18:29,078,027-29,128,814 | AX-90030628 |
| DSG2 | rs113451409 | chr18:29,078,027-29,128,814 | AX-83112681 |
| DSG2 | ---         | chr18:29,078,027-29,128,814 | AX-90045229 |
| DSG2 | ---         | chr18:29,078,027-29,128,814 | AX-94380934 |
| DSG2 | rs397516709 | chr18:29,078,027-29,128,814 | AX-90036087 |
| DSG2 | ---         | chr18:29,078,027-29,128,814 | AX-94362764 |
| DSG2 | ---         | chr18:29,078,027-29,128,814 | AX-94379515 |
| DSG2 | ---         | chr18:29,078,027-29,128,814 | AX-90026798 |
| DSG2 | ---         | chr18:29,078,027-29,128,814 | AX-90033474 |
| DSG2 | ---         | chr18:29,078,027-29,128,814 | AX-90028115 |
| DSG2 | rs72938894  | chr18:29,078,027-29,128,814 | AX-13286783 |
| DSG2 | rs200997703 | chr18:29,078,027-29,128,814 | AX-83042470 |
| DSG2 | rs369869320 | chr18:29,078,027-29,128,814 | AX-91991603 |
| DSG2 | ---         | chr18:29,078,027-29,128,814 | AX-94379516 |
| DSG2 | rs121913011 | chr18:29,078,027-29,128,814 | AX-88754503 |
| DSG2 | ---         | chr18:29,078,027-29,128,814 | AX-94362767 |
| DSG2 | ---         | chr18:29,078,027-29,128,814 | AX-90074427 |
| DSG2 | ---         | chr18:29,078,027-29,128,814 | AX-90080849 |
| DSG2 | ---         | chr18:29,078,027-29,128,814 | AX-94364076 |
| DSG2 | rs62095193  | chr18:29,078,027-29,128,814 | AX-91983016 |
| DSG2 | rs2230233   | chr18:29,078,027-29,128,814 | AX-12521924 |
| DSG2 | ---         | chr18:29,078,027-29,128,814 | AX-94360221 |

|      |             |                             |             |
|------|-------------|-----------------------------|-------------|
| DSG2 | ---         | chr18:29,078,027-29,128,814 | AX-11376787 |
| DSG2 | ---         | chr18:29,078,027-29,128,814 | AX-90049768 |
| DSG2 | ---         | chr18:29,078,027-29,128,814 | AX-90058651 |
| DSG2 | ---         | chr18:29,078,027-29,128,814 | AX-90055684 |
| DSG2 | ---         | chr18:29,078,027-29,128,814 | AX-94360222 |
| DSG2 | rs121913007 | chr18:29,078,027-29,128,814 | AX-88754500 |
| DSG2 | rs201040643 | chr18:29,078,027-29,128,814 | AX-83098438 |
| DSG2 | ---         | chr18:29,078,027-29,128,814 | AX-90055685 |
| DSG2 | ---         | chr18:29,078,027-29,128,814 | AX-90063195 |
| DSG2 | rs121913012 | chr18:29,078,027-29,128,814 | AX-88797549 |
| DSG2 | ---         | chr18:29,078,027-29,128,814 | AX-94360223 |
| DSG2 | rs191564916 | chr18:29,078,027-29,128,814 | AX-83429278 |
| DSG2 | rs2704041   | chr18:29,078,027-29,128,814 | AX-13286797 |
| DSG2 | rs1941938   | chr18:29,078,027-29,128,814 | AX-13286804 |
| DSG2 | ---         | chr18:29,078,027-29,128,814 | AX-91984008 |
| DSG2 | rs139326669 | chr18:29,078,027-29,128,814 | AX-83030529 |
| DSG2 | ---         | chr18:29,078,027-29,128,814 | AX-94356320 |
| DSG2 | rs369214871 | chr18:29,078,027-29,128,814 | AX-94373071 |
| DSG2 | rs193922639 | chr18:29,078,027-29,128,814 | AX-83218771 |
| DSG2 | ---         | chr18:29,078,027-29,128,814 | AX-90077630 |
| DSG2 | ---         | chr18:29,078,027-29,128,814 | AX-94363960 |
| DSG2 | rs74699553  | chr18:29,078,027-29,128,814 | AX-32423527 |
| DSG2 | rs116675326 | chr18:29,078,027-29,128,814 | AX-37822465 |
| DSG2 | rs370509593 | chr18:29,078,027-29,128,814 | AX-94373072 |
| DSG2 | ---         | chr18:29,078,027-29,128,814 | AX-94356323 |
| DSG2 | ---         | chr18:29,078,027-29,128,814 | AX-90028108 |
| DSG2 | ---         | chr18:29,078,027-29,128,814 | AX-94373074 |
| DSG2 | rs375679311 | chr18:29,078,027-29,128,814 | AX-91997174 |
| DSG2 | ---         | chr18:29,078,027-29,128,814 | AX-94373075 |
| DSG2 | ---         | chr18:29,078,027-29,128,814 | AX-94356326 |
| DSG2 | rs121913009 | chr18:29,078,027-29,128,814 | AX-88797547 |
| DSG2 | rs2230235   | chr18:29,078,027-29,128,814 | AX-40292159 |
| DSG2 | rs200509948 | chr18:29,078,027-29,128,814 | AX-82983150 |
| DSG2 | ---         | chr18:29,078,027-29,128,814 | AX-86715751 |
| DSG2 | ---         | chr18:29,078,027-29,128,814 | AX-90026801 |
| DSG2 | ---         | chr18:29,078,027-29,128,814 | AX-90026802 |
| DSG2 | ---         | chr18:29,078,027-29,128,814 | AX-86614126 |
| DSG2 | rs199681901 | chr18:29,078,027-29,128,814 | AX-83349431 |
| DSG2 | ---         | chr18:29,078,027-29,128,814 | AX-94356327 |
| DSG2 | rs368257724 | chr18:29,078,027-29,128,814 | AX-92016681 |
| DSG2 | rs375527314 | chr18:29,078,027-29,128,814 | AX-94373078 |
| DSG2 | rs35743180  | chr18:29,078,027-29,128,814 | AX-32423553 |
| DSG2 | rs16962075  | chr18:29,078,027-29,128,814 | AX-13286824 |
| DSG2 | rs397514038 | chr18:29,078,027-29,128,814 | AX-90028054 |
| DSG2 | rs201564919 | chr18:29,078,027-29,128,814 | AX-82970993 |
| DSG2 | ---         | chr18:29,078,027-29,128,814 | AX-90042975 |
| DSG2 | ---         | chr18:29,078,027-29,128,814 | AX-90074695 |
| DSG2 | ---         | chr18:29,078,027-29,128,814 | AX-94363961 |
| DSG2 | rs141388237 | chr18:29,078,027-29,128,814 | AX-94366807 |
| DSG2 | rs79241126  | chr18:29,078,027-29,128,814 | AX-37822467 |
| DSG2 | rs202063433 | chr18:29,078,027-29,128,814 | AX-94366808 |
| DSG2 | ---         | chr18:29,078,027-29,128,814 | AX-94373079 |
| DSG2 | rs2278792   | chr18:29,078,027-29,128,814 | AX-83039959 |
| DSG2 | ---         | chr18:29,078,027-29,128,814 | AX-94356330 |
| DSG2 | rs114544564 | chr18:29,078,027-29,128,814 | AX-63156066 |

|      |             |                             |             |
|------|-------------|-----------------------------|-------------|
| DSG2 | ---         | chr18:29,078,027-29,128,814 | AX-90026804 |
| DSG2 | ---         | chr18:29,078,027-29,128,814 | AX-90026805 |
| DSG2 | ---         | chr18:29,078,027-29,128,814 | AX-94357517 |
| DSG2 | rs1042769   | chr18:29,078,027-29,128,814 | AX-11106355 |
| DSG2 | rs16962093  | chr18:29,078,027-29,128,814 | AX-40292183 |
| DSG2 | rs370316475 | chr18:29,078,027-29,128,814 | AX-94373081 |
| DSG2 | rs34417028  | chr18:29,078,027-29,128,814 | AX-83245992 |
| DSG2 | rs371498622 | chr18:29,078,027-29,128,814 | AX-92016870 |
| DSG2 | ---         | chr18:29,078,027-29,128,814 | AX-94356332 |
| DSG2 | ---         | chr18:29,078,027-29,128,814 | AX-94373083 |
| DSG2 | rs142841727 | chr18:29,078,027-29,128,814 | AX-83454748 |
| DSG2 | ---         | chr18:29,078,027-29,128,814 | AX-90028913 |
| DSG2 | rs146402368 | chr18:29,078,027-29,128,814 | AX-94366809 |
| DSG2 | rs373055076 | chr18:29,078,027-29,128,814 | AX-91981324 |
| DSG2 | ---         | chr18:29,078,027-29,128,814 | AX-94373084 |
| DSG2 | ---         | chr18:29,078,027-29,128,814 | AX-94373085 |
| DSG2 | ---         | chr18:29,078,027-29,128,814 | AX-90079441 |
| DSG2 | ---         | chr18:29,078,027-29,128,814 | AX-94363962 |
| DSG2 | rs200830807 | chr18:29,078,027-29,128,814 | AX-91990430 |
| DSG2 | ---         | chr18:29,078,027-29,128,814 | AX-94380712 |
| DSG2 | rs8095704   | chr18:29,078,027-29,128,814 | AX-56740029 |
| DSG2 | rs397516707 | chr18:29,078,027-29,128,814 | AX-91977748 |
| DSG2 | ---         | chr18:29,078,027-29,128,814 | AX-94373086 |
| DSG2 | rs201786158 | chr18:29,078,027-29,128,814 | AX-86581709 |
| DSG2 | ---         | chr18:29,078,027-29,128,814 | AX-94356337 |
| DSG2 | rs149617776 | chr18:29,078,027-29,128,814 | AX-82964339 |
| DSG2 | ---         | chr18:29,078,027-29,128,814 | AX-90061230 |
| DSG2 | rs79068489  | chr18:29,078,027-29,128,814 | AX-63156073 |
| DSG2 | ---         | chr18:29,078,027-29,128,814 | AX-94347793 |
| DSG2 | rs1791235   | chr18:29,078,027-29,128,814 | AX-11344096 |
| DSP  | rs71559180  | chr6:7,541,870-7,586,946    | AX-88756407 |
| DSP  | rs121912998 | chr6:7,541,870-7,586,946    | AX-83545517 |
| DSP  | rs77445784  | chr6:7,541,870-7,586,946    | AX-92014316 |
| DSP  | rs36087964  | chr6:7,541,870-7,586,946    | AX-15441508 |
| DSP  | rs140403872 | chr6:7,541,870-7,586,946    | AX-92011841 |
| DSP  | rs2294454   | chr6:7,541,870-7,586,946    | AX-35880593 |
| DSP  | rs3823183   | chr6:7,541,870-7,586,946    | AX-35880621 |
| DSP  | rs7743265   | chr6:7,541,870-7,586,946    | AX-42028857 |
| DSP  | rs2744365   | chr6:7,541,870-7,586,946    | AX-11408647 |
| DSP  | rs140965835 | chr6:7,541,870-7,586,946    | AX-83484318 |
| DSP  | rs188516326 | chr6:7,541,870-7,586,946    | AX-83303821 |
| DSP  | rs200473206 | chr6:7,541,870-7,586,946    | AX-86656640 |
| DSP  | rs10484325  | chr6:7,541,870-7,586,946    | AX-11109241 |
| DSP  | rs28763958  | chr6:7,541,870-7,586,946    | AX-11423614 |
| DSP  | ---         | chr6:7,541,870-7,586,946    | AX-90033555 |
| DSP  | ---         | chr6:7,541,870-7,586,946    | AX-94361831 |
| DSP  | ---         | chr6:7,541,870-7,586,946    | AX-90025615 |
| DSP  | ---         | chr6:7,541,870-7,586,946    | AX-94360227 |
| DSP  | rs147315869 | chr6:7,541,870-7,586,946    | AX-83104694 |
| DSP  | rs397516955 | chr6:7,541,870-7,586,946    | AX-90054501 |
| DSP  | rs2744376   | chr6:7,541,870-7,586,946    | AX-11408649 |
| DSP  | ---         | chr6:7,541,870-7,586,946    | AX-94360228 |
| DSP  | ---         | chr6:7,541,870-7,586,946    | AX-90045731 |
| DSP  | ---         | chr6:7,541,870-7,586,946    | AX-94360229 |
| DSP  | rs28521706  | chr6:7,541,870-7,586,946    | AX-94348604 |

|     |             |                          |             |
|-----|-------------|--------------------------|-------------|
| DSP | ---         | chr6:7,541,870-7,586,946 | AX-90025617 |
| DSP | ---         | chr6:7,541,870-7,586,946 | AX-90063113 |
| DSP | rs3778337   | chr6:7,541,870-7,586,946 | AX-11479999 |
| DSP | ---         | chr6:7,541,870-7,586,946 | AX-90078416 |
| DSP | ---         | chr6:7,541,870-7,586,946 | AX-94364080 |
| DSP | rs121912991 | chr6:7,541,870-7,586,946 | AX-90042190 |
| DSP | ---         | chr6:7,541,870-7,586,946 | AX-94380830 |
| DSP | ---         | chr6:7,541,870-7,586,946 | AX-94376980 |
| DSP | ---         | chr6:7,541,870-7,586,946 | AX-90061977 |
| DSP | ---         | chr6:7,541,870-7,586,946 | AX-94360231 |
| DSP | ---         | chr6:7,541,870-7,586,946 | AX-94376982 |
| DSP | rs150422458 | chr6:7,541,870-7,586,946 | AX-91994253 |
| DSP | ---         | chr6:7,541,870-7,586,946 | AX-94360233 |
| DSP | rs397516914 | chr6:7,541,870-7,586,946 | AX-91983369 |
| DSP | ---         | chr6:7,541,870-7,586,946 | AX-90054503 |
| DSP | ---         | chr6:7,541,870-7,586,946 | AX-94376984 |
| DSP | ---         | chr6:7,541,870-7,586,946 | AX-94360235 |
| DSP | ---         | chr6:7,541,870-7,586,946 | AX-90032391 |
| DSP | ---         | chr6:7,541,870-7,586,946 | AX-90025619 |
| DSP | rs34543842  | chr6:7,541,870-7,586,946 | AX-94363898 |
| DSP | rs28763961  | chr6:7,541,870-7,586,946 | AX-35881649 |
| DSP | rs35820473  | chr6:7,541,870-7,586,946 | AX-91986597 |
| DSP | ---         | chr6:7,541,870-7,586,946 | AX-90025620 |
| DSP | ---         | chr6:7,541,870-7,586,946 | AX-94360236 |
| DSP | ---         | chr6:7,541,870-7,586,946 | AX-90029769 |
| DSP | rs148147581 | chr6:7,541,870-7,586,946 | AX-83125345 |
| DSP | ---         | chr6:7,541,870-7,586,946 | AX-90071973 |
| DSP | ---         | chr6:7,541,870-7,586,946 | AX-94363968 |
| DSP | rs34239595  | chr6:7,541,870-7,586,946 | AX-83527226 |
| DSP | ---         | chr6:7,541,870-7,586,946 | AX-90025621 |
| DSP | ---         | chr6:7,541,870-7,586,946 | AX-94356342 |
| DSP | ---         | chr6:7,541,870-7,586,946 | AX-94356343 |
| DSP | ---         | chr6:7,541,870-7,586,946 | AX-90028176 |
| DSP | ---         | chr6:7,541,870-7,586,946 | AX-94356344 |
| DSP | rs121912995 | chr6:7,541,870-7,586,946 | AX-90071078 |
| DSP | ---         | chr6:7,541,870-7,586,946 | AX-90037148 |
| DSP | rs2076304   | chr6:7,541,870-7,586,946 | AX-42029245 |
| DSP | ---         | chr6:7,541,870-7,586,946 | AX-94373095 |
| DSP | ---         | chr6:7,541,870-7,586,946 | AX-90037335 |
| DSP | rs28763963  | chr6:7,541,870-7,586,946 | AX-94348606 |
| DSP | rs139071827 | chr6:7,541,870-7,586,946 | AX-92010164 |
| DSP | rs150339369 | chr6:7,541,870-7,586,946 | AX-83138871 |
| DSP | rs372906646 | chr6:7,541,870-7,586,946 | AX-94356346 |
| DSP | rs121912994 | chr6:7,541,870-7,586,946 | AX-90071077 |
| DSP | ---         | chr6:7,541,870-7,586,946 | AX-94379530 |
| DSP | ---         | chr6:7,541,870-7,586,946 | AX-94379531 |
| DSP | ---         | chr6:7,541,870-7,586,946 | AX-90073366 |
| DSP | ---         | chr6:7,541,870-7,586,946 | AX-94364188 |
| DSP | ---         | chr6:7,541,870-7,586,946 | AX-94379532 |
| DSP | ---         | chr6:7,541,870-7,586,946 | AX-94362783 |
| DSP | ---         | chr6:7,541,870-7,586,946 | AX-94364189 |
| DSP | rs1016835   | chr6:7,541,870-7,586,946 | AX-15442436 |
| DSP | ---         | chr6:7,541,870-7,586,946 | AX-94379534 |
| DSP | rs146407262 | chr6:7,541,870-7,586,946 | AX-15442437 |
| DSP | rs375891215 | chr6:7,541,870-7,586,946 | AX-91999040 |

|     |             |                          |             |
|-----|-------------|--------------------------|-------------|
| DSP | ---         | chr6:7,541,870-7,586,946 | AX-94362785 |
| DSP | rs142494121 | chr6:7,541,870-7,586,946 | AX-83448715 |
| DSP | ---         | chr6:7,541,870-7,586,946 | AX-90072105 |
| DSP | ---         | chr6:7,541,870-7,586,946 | AX-94364190 |
| DSP | rs80325569  | chr6:7,541,870-7,586,946 | AX-15442448 |
| DSP | ---         | chr6:7,541,870-7,586,946 | AX-90027780 |
| DSP | rs2064217   | chr6:7,541,870-7,586,946 | AX-15442452 |
| DSP | rs190421916 | chr6:7,541,870-7,586,946 | AX-94368169 |
| DSP | rs397516928 | chr6:7,541,870-7,586,946 | AX-91995716 |
| DSP | ---         | chr6:7,541,870-7,586,946 | AX-90080782 |
| DSP | rs397516929 | chr6:7,541,870-7,586,946 | AX-90036528 |
| DSP | ---         | chr6:7,541,870-7,586,946 | AX-90046552 |
| DSP | ---         | chr6:7,541,870-7,586,946 | AX-94380940 |
| DSP | ---         | chr6:7,541,870-7,586,946 | AX-90080600 |
| DSP | ---         | chr6:7,541,870-7,586,946 | AX-94364192 |
| DSP | ---         | chr6:7,541,870-7,586,946 | AX-91978296 |
| DSP | rs372440854 | chr6:7,541,870-7,586,946 | AX-91978458 |
| DSP | ---         | chr6:7,541,870-7,586,946 | AX-91996956 |
| DSP | ---         | chr6:7,541,870-7,586,946 | AX-90054507 |
| DSP | rs41302881  | chr6:7,541,870-7,586,946 | AX-94365360 |
| DSP | rs28763964  | chr6:7,541,870-7,586,946 | AX-35881979 |
| DSP | ---         | chr6:7,541,870-7,586,946 | AX-94379536 |
| DSP | ---         | chr6:7,541,870-7,586,946 | AX-94361832 |
| DSP | rs535202724 | chr6:7,541,870-7,586,946 | AX-94361833 |
| DSP | ---         | chr6:7,541,870-7,586,946 | AX-90054508 |
| DSP | ---         | chr6:7,541,870-7,586,946 | AX-90027914 |
| DSP | rs121912997 | chr6:7,541,870-7,586,946 | AX-90071080 |
| DSP | ---         | chr6:7,541,870-7,586,946 | AX-94379537 |
| DSP | ---         | chr6:7,541,870-7,586,946 | AX-90065543 |
| DSP | ---         | chr6:7,541,870-7,586,946 | AX-83570239 |
| DSP | ---         | chr6:7,541,870-7,586,946 | AX-94364193 |
| DSP | rs41302883  | chr6:7,541,870-7,586,946 | AX-94348610 |
| DSP | ---         | chr6:7,541,870-7,586,946 | AX-94364194 |
| DSP | ---         | chr6:7,541,870-7,586,946 | AX-94362788 |
| DSP | ---         | chr6:7,541,870-7,586,946 | AX-94364195 |
| DSP | rs148478829 | chr6:7,541,870-7,586,946 | AX-92012902 |
| DSP | rs200745877 | chr6:7,541,870-7,586,946 | AX-83304309 |
| DSP | rs75537269  | chr6:7,541,870-7,586,946 | AX-83464051 |
| DSP | ---         | chr6:7,541,870-7,586,946 | AX-90034758 |
| DSP | ---         | chr6:7,541,870-7,586,946 | AX-83532255 |
| DSP | rs140029036 | chr6:7,541,870-7,586,946 | AX-92013669 |
| DSP | ---         | chr6:7,541,870-7,586,946 | AX-94379539 |
| DSP | rs148041814 | chr6:7,541,870-7,586,946 | AX-83310860 |
| DSP | rs375919492 | chr6:7,541,870-7,586,946 | AX-91989668 |
| DSP | rs2076299   | chr6:7,541,870-7,586,946 | AX-11365962 |
| DSP | rs375150075 | chr6:7,541,870-7,586,946 | AX-92001803 |
| DSP | rs28763966  | chr6:7,541,870-7,586,946 | AX-42029347 |
| DSP | rs141227126 | chr6:7,541,870-7,586,946 | AX-83301791 |
| DSP | ---         | chr6:7,541,870-7,586,946 | AX-94362790 |
| DSP | rs28763967  | chr6:7,541,870-7,586,946 | AX-11423616 |
| DSP | rs28763968  | chr6:7,541,870-7,586,946 | AX-11423617 |
| DSP | rs200421954 | chr6:7,541,870-7,586,946 | AX-83313067 |
| DSP | ---         | chr6:7,541,870-7,586,946 | AX-90058880 |
| DSP | rs200243976 | chr6:7,541,870-7,586,946 | AX-94368170 |
| DSP | ---         | chr6:7,541,870-7,586,946 | AX-90025624 |



|     |             |                          |             |
|-----|-------------|--------------------------|-------------|
| DSP | ---         | chr6:7,541,870-7,586,946 | AX-94379541 |
| DSP | rs142803672 | chr6:7,541,870-7,586,946 | AX-83570959 |
| DSP | rs147415451 | chr6:7,541,870-7,586,946 | AX-83057070 |
| DSP | ---         | chr6:7,541,870-7,586,946 | AX-94362792 |
| DSP | ---         | chr6:7,541,870-7,586,946 | AX-90079683 |
| DSP | rs6929069   | chr6:7,541,870-7,586,946 | AX-11595086 |
| DSP | rs142885240 | chr6:7,541,870-7,586,946 | AX-83338834 |
| DSP | rs376186141 | chr6:7,541,870-7,586,946 | AX-91980345 |
| DSP | rs397516946 | chr6:7,541,870-7,586,946 | AX-92011042 |
| DSP | ---         | chr6:7,541,870-7,586,946 | AX-94371725 |
| DSP | rs377715841 | chr6:7,541,870-7,586,946 | AX-86731812 |
| DSP | rs562015789 | chr6:7,541,870-7,586,946 | AX-94371726 |
| DSP | ---         | chr6:7,541,870-7,586,946 | AX-90054510 |
| DSP | rs144392839 | chr6:7,541,870-7,586,946 | AX-83546477 |
| DSP | rs121912996 | chr6:7,541,870-7,586,946 | AX-90071079 |
| DSP | ---         | chr6:7,541,870-7,586,946 | AX-94380659 |
| DSP | ---         | chr6:7,541,870-7,586,946 | AX-92015551 |
| DSP | ---         | chr6:7,541,870-7,586,946 | AX-90081112 |
| DSP | ---         | chr6:7,541,870-7,586,946 | AX-90025626 |
| DSP | rs41302885  | chr6:7,541,870-7,586,946 | AX-50506002 |
| DSP | rs144263721 | chr6:7,541,870-7,586,946 | AX-83250868 |
| DSP | ---         | chr6:7,541,870-7,586,946 | AX-94371728 |
| DSP | rs28763969  | chr6:7,541,870-7,586,946 | AX-11423618 |
| DSP | ---         | chr6:7,541,870-7,586,946 | AX-94371729 |
| DSP | rs34476546  | chr6:7,541,870-7,586,946 | AX-94380651 |
| DSP | rs397516953 | chr6:7,541,870-7,586,946 | AX-92008157 |
| DSP | rs149070106 | chr6:7,541,870-7,586,946 | AX-92007671 |
| DSP | ---         | chr6:7,541,870-7,586,946 | AX-83523868 |
| DSP | ---         | chr6:7,541,870-7,586,946 | AX-90054512 |
| DSP | ---         | chr6:7,541,870-7,586,946 | AX-83191772 |
| DSP | rs34238014  | chr6:7,541,870-7,586,946 | AX-94363892 |
| DSP | ---         | chr6:7,541,870-7,586,946 | AX-90054513 |
| DSP | rs34334797  | chr6:7,541,870-7,586,946 | AX-94363907 |
| DSP | rs28931610  | chr6:7,541,870-7,586,946 | AX-90066946 |
| DSP | rs387906618 | chr6:7,541,870-7,586,946 | AX-90033565 |
| DSP | rs2076300   | chr6:7,541,870-7,586,946 | AX-15442621 |
| DSP | ---         | chr6:7,541,870-7,586,946 | AX-90048484 |
| DSP | rs78843072  | chr6:7,541,870-7,586,946 | AX-92015274 |
| DSP | ---         | chr6:7,541,870-7,586,946 | AX-90051633 |
| DSP | ---         | chr6:7,541,870-7,586,946 | AX-94380660 |
| DSP | ---         | chr6:7,541,870-7,586,946 | AX-94354980 |
| DSP | rs142078450 | chr6:7,541,870-7,586,946 | AX-83345048 |
| DSP | ---         | chr6:7,541,870-7,586,946 | AX-90047474 |
| DSP | ---         | chr6:7,541,870-7,586,946 | AX-94357852 |
| DSP | rs371129517 | chr6:7,541,870-7,586,946 | AX-91983157 |
| DSP | ---         | chr6:7,541,870-7,586,946 | AX-90025629 |
| DSP | ---         | chr6:7,541,870-7,586,946 | AX-94354981 |
| DSP | rs116888866 | chr6:7,541,870-7,586,946 | AX-15442634 |
| DSP | rs35379048  | chr6:7,541,870-7,586,946 | AX-11462949 |
| DSP | ---         | chr6:7,541,870-7,586,946 | AX-90025630 |
| DSP | rs144275591 | chr6:7,541,870-7,586,946 | AX-91980898 |
| DSP | ---         | chr6:7,541,870-7,586,946 | AX-94371732 |
| DSP | ---         | chr6:7,541,870-7,586,946 | AX-94371733 |
| DSP | ---         | chr6:7,541,870-7,586,946 | AX-94354984 |
| DSP | ---         | chr6:7,541,870-7,586,946 | AX-35882151 |

|      |             |                              |                 |
|------|-------------|------------------------------|-----------------|
| DSP  | rs201397978 | chr6:7,541,870-7,586,946     | AX-94354080     |
| DSP  | ---         | chr6:7,541,870-7,586,946     | AX-94371735     |
| DSP  | ---         | chr6:7,541,870-7,586,946     | AX-90079854     |
| DSP  | ---         | chr6:7,541,870-7,586,946     | AX-94380662     |
| DSP  | rs34884895  | chr6:7,541,870-7,586,946     | AX-83505480     |
| DSP  | ---         | chr6:7,541,870-7,586,946     | AX-94354986     |
| DSP  | rs397516964 | chr6:7,541,870-7,586,946     | AX-92009212     |
| DSP  | rs377148997 | chr6:7,541,870-7,586,946     | AX-94354987     |
| DSP  | rs138329459 | chr6:7,541,870-7,586,946     | AX-83481875     |
| DSP  | rs201826850 | chr6:7,541,870-7,586,946     | AX-94354083     |
| DSP  | rs2744380   | chr6:7,541,870-7,586,946     | AX-15442638     |
| DSP  | ---         | chr6:7,541,870-7,586,946     | AX-94354988     |
| DSP  | rs121912999 | chr6:7,541,870-7,586,946     | AX-88756898     |
| DSP  | ---         | chr6:7,541,870-7,586,946     | AX-83352285     |
| DSP  | rs374137476 | chr6:7,541,870-7,586,946     | AX-94354989     |
| DSP  | rs397516972 | chr6:7,541,870-7,586,946     | AX-91976947     |
| DSP  | rs28763971  | chr6:7,541,870-7,586,946     | AX-11423619     |
| DSP  | rs11558732  | chr6:7,541,870-7,586,946     | AX-84785970     |
| ELN  | rs4717865   | chr7:73,442,427-73,484,236   | AX-42245581     |
| ELN  | rs145612009 | chr7:73,442,427-73,484,236   | AX-83535722     |
| ELN  | ---         | chr7:73,442,427-73,484,236   | AX-90050524     |
| ELN  | rs2071307   | chr7:73,442,427-73,484,236   | AX-11365338     |
| ELN  | ---         | chr7:73,442,427-73,484,236   | AX-86565231     |
| ELN  | rs2856728   | chr7:73,442,427-73,484,236   | AFFX-KIT-000161 |
| ELN  | rs17855988  | chr7:73,442,427-73,484,236   | AX-82904042     |
| ELN  | ---         | chr7:73,442,427-73,484,236   | AX-94379929     |
| ELN  | rs41511151  | chr7:73,442,427-73,484,236   | AX-83369784     |
| ELN  | rs8326      | chr7:73,442,427-73,484,236   | AX-36311377     |
| EMD  | ---         | chrX:153,607,597-153,609,883 | AX-90073408     |
| EYA4 | rs117683183 | chr6:133,561,736-133,853,258 | AX-67483179     |
| EYA4 | rs533729    | chr6:133,561,736-133,853,258 | AX-15245245     |
| EYA4 | rs111288063 | chr6:133,561,736-133,853,258 | AX-15245281     |
| EYA4 | rs11154720  | chr6:133,561,736-133,853,258 | AX-11147536     |
| EYA4 | rs2145348   | chr6:133,561,736-133,853,258 | AX-15245293     |
| EYA4 | rs211432    | chr6:133,561,736-133,853,258 | AX-12517663     |
| EYA4 | rs62430314  | chr6:133,561,736-133,853,258 | AX-15245335     |
| EYA4 | rs9373047   | chr6:133,561,736-133,853,258 | AX-35561619     |
| EYA4 | rs950374    | chr6:133,561,736-133,853,258 | AX-12661813     |
| EYA4 | rs11757185  | chr6:133,561,736-133,853,258 | AX-12418655     |
| EYA4 | rs112430404 | chr6:133,561,736-133,853,258 | AX-38319533     |
| EYA4 | rs77564299  | chr6:133,561,736-133,853,258 | AX-15245424     |
| EYA4 | rs12201595  | chr6:133,561,736-133,853,258 | AX-41853649     |
| EYA4 | rs34353709  | chr6:133,561,736-133,853,258 | AX-41853685     |
| EYA4 | rs11753937  | chr6:133,561,736-133,853,258 | AX-11172939     |
| EYA4 | rs9402503   | chr6:133,561,736-133,853,258 | AX-35561755     |
| EYA4 | rs4895961   | chr6:133,561,736-133,853,258 | AX-11534338     |
| EYA4 | rs9399061   | chr6:133,561,736-133,853,258 | AX-15245512     |
| EYA4 | rs77910661  | chr6:133,561,736-133,853,258 | AX-38319559     |
| EYA4 | rs2031596   | chr6:133,561,736-133,853,258 | AX-11361340     |
| EYA4 | rs17062411  | chr6:133,561,736-133,853,258 | AX-11302385     |
| EYA4 | rs7760570   | chr6:133,561,736-133,853,258 | AX-11643730     |
| EYA4 | rs159418    | chr6:133,561,736-133,853,258 | AX-12470822     |
| EYA4 | rs465147    | chr6:133,561,736-133,853,258 | AX-15245640     |
| EYA4 | rs34512762  | chr6:133,561,736-133,853,258 | AX-11448241     |
| EYA4 | rs117503067 | chr6:133,561,736-133,853,258 | AX-38319577     |

|       |             |                              |              |
|-------|-------------|------------------------------|--------------|
| EYA4  | rs17062478  | chr6:133,561,736-133,853,258 | AX-11302391  |
| EYA4  | rs1014980   | chr6:133,561,736-133,853,258 | AX-12383164  |
| EYA4  | rs212788    | chr6:133,561,736-133,853,258 | AX-12518154  |
| EYA4  | rs150462    | chr6:133,561,736-133,853,258 | AX-35562001  |
| EYA4  | rs13205584  | chr6:133,561,736-133,853,258 | AX-11244293  |
| EYA4  | rs380367    | chr6:133,561,736-133,853,258 | AX-15245779  |
| EYA4  | rs79709397  | chr6:133,561,736-133,853,258 | AX-15245797  |
| EYA4  | rs3777864   | chr6:133,561,736-133,853,258 | AX-15245811  |
| EYA4  | rs73544945  | chr6:133,561,736-133,853,258 | AX-15245825  |
| EYA4  | rs73544950  | chr6:133,561,736-133,853,258 | AX-15245836  |
| EYA4  | rs9493627   | chr6:133,561,736-133,853,258 | AX-11689931  |
| EYA4  | rs41286200  | chr6:133,561,736-133,853,258 | AX-11492697  |
| EYA4  | rs212764    | chr6:133,561,736-133,853,258 | AX-11369057  |
| EYA4  | rs3777866   | chr6:133,561,736-133,853,258 | AX-15245853  |
| EYA4  | rs62429425  | chr6:133,561,736-133,853,258 | AX-15245866  |
| EYA4  | rs35762882  | chr6:133,561,736-133,853,258 | AX-12557383  |
| EYA4  | rs144415484 | chr6:133,561,736-133,853,258 | AX-83017592  |
| EYA4  | rs6905892   | chr6:133,561,736-133,853,258 | AX-41853983  |
| EYA4  | rs3777868   | chr6:133,561,736-133,853,258 | AX-15245889  |
| EYA4  | rs1883388   | chr6:133,561,736-133,853,258 | AX-11349867  |
| EYA4  | rs56253925  | chr6:133,561,736-133,853,258 | AX-35562229  |
| EYA4  | rs2277083   | chr6:133,561,736-133,853,258 | AX-15245944  |
| EYA4  | rs79506917  | chr6:133,561,736-133,853,258 | AX-15245950  |
| EYA4  | rs56208430  | chr6:133,561,736-133,853,258 | AX-35562241  |
| EYA4  | ---         | chr6:133,561,736-133,853,258 | AX-90037092  |
| EYA4  | rs17643040  | chr6:133,561,736-133,853,258 | AX-15245982  |
| EYA4  | rs9483586   | chr6:133,561,736-133,853,258 | AX-15245989  |
| FXN   | rs7871596   | chr9:71,650,479-71,715,094   | AX-16248256  |
| FXN   | rs59907886  | chr9:71,650,479-71,715,094   | AX-16248262  |
| FXN   | ---         | chr9:71,650,479-71,715,094   | AX-90065756  |
| FXN   | ---         | chr9:71,650,479-71,715,094   | AX-86548923  |
| FXN   | rs9411179   | chr9:71,650,479-71,715,094   | AX-42628793  |
| FXN   | rs4304388   | chr9:71,650,479-71,715,094   | AX-42628795  |
| FXN   | rs76901520  | chr9:71,650,479-71,715,094   | AX-37027661  |
| FXN   | rs3793465   | chr9:71,650,479-71,715,094   | AX-42628805  |
| FXN   | rs143340609 | chr9:71,650,479-71,715,094   | AX-83566421  |
| FXN   | rs143396368 | chr9:71,650,479-71,715,094   | AX-90042447  |
| FXN   | rs4745581   | chr9:71,650,479-71,715,094   | AX-16248321  |
| FXN   | rs56657504  | chr9:71,650,479-71,715,094   | AX-37027731  |
| FXN   | rs7859021   | chr9:71,650,479-71,715,094   | AX-42628845  |
| FXN   | rs10125005  | chr9:71,650,479-71,715,094   | AX-11094444  |
| FXN   | rs11145194  | chr9:71,650,479-71,715,094   | AX-42628855  |
| FXN   | rs11145204  | chr9:71,650,479-71,715,094   | AX-42628857  |
| GATA4 | rs35813172  | chr8:11,561,717-11,617,509   | AX-156282735 |
| GATA4 | rs35813172  | chr8:11,561,717-11,617,509   | AX-156297257 |
| GATA4 | rs34888744  | chr8:11,561,717-11,617,509   | AX-36426389  |
| GATA4 | rs62489318  | chr8:11,561,717-11,617,509   | AX-36426395  |
| GATA4 | rs77480632  | chr8:11,561,717-11,617,509   | AX-121257441 |
| GATA4 | rs77480632  | chr8:11,561,717-11,617,509   | AX-156293760 |
| GATA4 | rs62489319  | chr8:11,561,717-11,617,509   | AX-156277049 |
| GATA4 | rs62489319  | chr8:11,561,717-11,617,509   | AX-156293761 |
| GATA4 | rs73203483  | chr8:11,561,717-11,617,509   | AX-36426449  |
| GATA4 | rs4269498   | chr8:11,561,717-11,617,509   | AX-42309109  |
| GATA4 | rs10088151  | chr8:11,561,717-11,617,509   | AX-42309129  |
| GATA4 | rs199922907 | chr8:11,561,717-11,617,509   | AX-90067531  |

|       |             |                            |              |
|-------|-------------|----------------------------|--------------|
| GATA4 | ---         | chr8:11,561,717-11,617,509 | AX-90028636  |
| GATA4 | rs202213149 | chr8:11,561,717-11,617,509 | AX-90067532  |
| GATA4 | ---         | chr8:11,561,717-11,617,509 | AX-90054527  |
| GATA4 | ---         | chr8:11,561,717-11,617,509 | AX-90057739  |
| GATA4 | ---         | chr8:11,561,717-11,617,509 | AX-90072439  |
| GATA4 | rs104894074 | chr8:11,561,717-11,617,509 | AX-88800140  |
| GATA4 | rs56348550  | chr8:11,561,717-11,617,509 | AX-91995986  |
| GATA4 | rs56348550  | chr8:11,561,717-11,617,509 | AX-92021113  |
| GATA4 | ---         | chr8:11,561,717-11,617,509 | AX-90056235  |
| GATA4 | rs387906769 | chr8:11,561,717-11,617,509 | AX-90063886  |
| GATA4 | rs4489290   | chr8:11,561,717-11,617,509 | AX-156268564 |
| GATA4 | rs4489290   | chr8:11,561,717-11,617,509 | AX-156288299 |
| GATA4 | rs7817412   | chr8:11,561,717-11,617,509 | AX-156268565 |
| GATA4 | rs7817412   | chr8:11,561,717-11,617,509 | AX-156288300 |
| GATA4 | rs10096526  | chr8:11,561,717-11,617,509 | AX-156268566 |
| GATA4 | rs10096526  | chr8:11,561,717-11,617,509 | AX-156288301 |
| GATA4 | rs13282985  | chr8:11,561,717-11,617,509 | AX-156268567 |
| GATA4 | rs13249227  | chr8:11,561,717-11,617,509 | AX-122308974 |
| GATA4 | rs13249227  | chr8:11,561,717-11,617,509 | AX-96665892  |
| GATA4 | rs111721287 | chr8:11,561,717-11,617,509 | AX-156268568 |
| GATA4 | rs13267318  | chr8:11,561,717-11,617,509 | AX-42309209  |
| GATA4 | rs28473684  | chr8:11,561,717-11,617,509 | AX-36426689  |
| GATA4 | rs6990313   | chr8:11,561,717-11,617,509 | AX-147869167 |
| GATA4 | rs6990313   | chr8:11,561,717-11,617,509 | AX-147964355 |
| GATA4 | rs2409813   | chr8:11,561,717-11,617,509 | AX-120962202 |
| GATA4 | rs13278753  | chr8:11,561,717-11,617,509 | AX-42309249  |
| GATA4 | rs61265429  | chr8:11,561,717-11,617,509 | AX-36426739  |
| GATA4 | rs10112464  | chr8:11,561,717-11,617,509 | AX-15830516  |
| GATA4 | rs10105409  | chr8:11,561,717-11,617,509 | AX-42309269  |
| GATA4 | rs2409812   | chr8:11,561,717-11,617,509 | AX-15830547  |
| GATA4 | rs7837066   | chr8:11,561,717-11,617,509 | AX-156277050 |
| GATA4 | rs7837066   | chr8:11,561,717-11,617,509 | AX-96620463  |
| GATA4 | rs4410868   | chr8:11,561,717-11,617,509 | AX-15830614  |
| GATA4 | rs6601604   | chr8:11,561,717-11,617,509 | AX-11574698  |
| GATA4 | rs28394863  | chr8:11,561,717-11,617,509 | AX-36426913  |
| GATA4 | rs6601605   | chr8:11,561,717-11,617,509 | AX-11574699  |
| GATA4 | rs12546793  | chr8:11,561,717-11,617,509 | AX-156277051 |
| GATA4 | rs12546793  | chr8:11,561,717-11,617,509 | AX-156293762 |
| GATA4 | rs13270069  | chr8:11,561,717-11,617,509 | AX-15830737  |
| GATA4 | rs59792049  | chr8:11,561,717-11,617,509 | AX-15830757  |
| GATA4 | rs10112596  | chr8:11,561,717-11,617,509 | AX-15830759  |
| GATA4 | rs7833127   | chr8:11,561,717-11,617,509 | AX-15830760  |
| GATA4 | rs12550668  | chr8:11,561,717-11,617,509 | AX-11214291  |
| GATA4 | rs2409808   | chr8:11,561,717-11,617,509 | AX-11390262  |
| GATA4 | rs73203495  | chr8:11,561,717-11,617,509 | AX-36427001  |
| GATA4 | rs11994925  | chr8:11,561,717-11,617,509 | AX-156277052 |
| GATA4 | rs11994925  | chr8:11,561,717-11,617,509 | AX-156293763 |
| GATA4 | rs73663201  | chr8:11,561,717-11,617,509 | AX-36427003  |
| GATA4 | rs7846104   | chr8:11,561,717-11,617,509 | AX-156277053 |
| GATA4 | rs7846104   | chr8:11,561,717-11,617,509 | AX-92524696  |
| GATA4 | rs7833508   | chr8:11,561,717-11,617,509 | AX-151278433 |
| GATA4 | rs7833508   | chr8:11,561,717-11,617,509 | AX-156277054 |
| GATA4 | rs9329247   | chr8:11,561,717-11,617,509 | AX-15830785  |
| GATA4 | rs2409807   | chr8:11,561,717-11,617,509 | AX-42309389  |
| GATA4 | rs10106250  | chr8:11,561,717-11,617,509 | AX-42309397  |

|       |             |                            |              |
|-------|-------------|----------------------------|--------------|
| GATA4 | rs62489341  | chr8:11,561,717-11,617,509 | AX-15830825  |
| GATA4 | rs62489342  | chr8:11,561,717-11,617,509 | AX-36427063  |
| GATA4 | rs73203500  | chr8:11,561,717-11,617,509 | AX-36427067  |
| GATA4 | rs60197293  | chr8:11,561,717-11,617,509 | AX-36427073  |
| GATA4 | rs2898292   | chr8:11,561,717-11,617,509 | AX-42309413  |
| GATA4 | rs59035560  | chr8:11,561,717-11,617,509 | AX-156268569 |
| GATA4 | rs59035560  | chr8:11,561,717-11,617,509 | AX-156288303 |
| GATA4 | rs76971783  | chr8:11,561,717-11,617,509 | AX-36427091  |
| GATA4 | rs56745056  | chr8:11,561,717-11,617,509 | AX-36427093  |
| GATA4 | rs10086064  | chr8:11,561,717-11,617,509 | AX-42309427  |
| GATA4 | rs4840579   | chr8:11,561,717-11,617,509 | AX-12583314  |
| GATA4 | rs35558975  | chr8:11,561,717-11,617,509 | AX-36427107  |
| GATA4 | rs6986736   | chr8:11,561,717-11,617,509 | AX-42309433  |
| GATA4 | rs34960871  | chr8:11,561,717-11,617,509 | AX-36427109  |
| GATA4 | rs13277376  | chr8:11,561,717-11,617,509 | AX-156277055 |
| GATA4 | rs13277376  | chr8:11,561,717-11,617,509 | AX-156293764 |
| GATA4 | rs2409806   | chr8:11,561,717-11,617,509 | AX-148371899 |
| GATA4 | rs2409806   | chr8:11,561,717-11,617,509 | AX-156268570 |
| GATA4 | rs2001470   | chr8:11,561,717-11,617,509 | AX-42309473  |
| GATA4 | rs7840794   | chr8:11,561,717-11,617,509 | AX-148480544 |
| GATA4 | rs7840794   | chr8:11,561,717-11,617,509 | AX-148526330 |
| GATA4 | rs2001469   | chr8:11,561,717-11,617,509 | AX-148239469 |
| GATA4 | rs2001469   | chr8:11,561,717-11,617,509 | AX-156268571 |
| GATA4 | rs12541921  | chr8:11,561,717-11,617,509 | AX-156268572 |
| GATA4 | rs12541921  | chr8:11,561,717-11,617,509 | AX-96702732  |
| GATA4 | rs11250159  | chr8:11,561,717-11,617,509 | AX-11153523  |
| GATA4 | rs199521840 | chr8:11,561,717-11,617,509 | AX-156286428 |
| GATA4 | rs10109678  | chr8:11,561,717-11,617,509 | AX-36427217  |
| GATA4 | rs10096189  | chr8:11,561,717-11,617,509 | AX-156268573 |
| GATA4 | rs10096189  | chr8:11,561,717-11,617,509 | AX-156288304 |
| GATA4 | rs17153694  | chr8:11,561,717-11,617,509 | AX-42309517  |
| GATA4 | rs13278982  | chr8:11,561,717-11,617,509 | AX-36427229  |
| GATA4 | rs34421088  | chr8:11,561,717-11,617,509 | AX-156268574 |
| GATA4 | rs10503426  | chr8:11,561,717-11,617,509 | AX-11112629  |
| GATA4 | rs28488522  | chr8:11,561,717-11,617,509 | AX-36427247  |
| GATA4 | rs111589866 | chr8:11,561,717-11,617,509 | AX-38410671  |
| GATA4 | rs17153698  | chr8:11,561,717-11,617,509 | AX-147862748 |
| GATA4 | rs17153698  | chr8:11,561,717-11,617,509 | AX-147956931 |
| GATA4 | rs4613960   | chr8:11,561,717-11,617,509 | AX-12575841  |
| GATA4 | rs6983129   | chr8:11,561,717-11,617,509 | AX-11599025  |
| GATA4 | rs62489347  | chr8:11,561,717-11,617,509 | AX-15831110  |
| GATA4 | rs35928010  | chr8:11,561,717-11,617,509 | AX-156268575 |
| GATA4 | rs35726503  | chr8:11,561,717-11,617,509 | AX-156282736 |
| GATA4 | rs35726503  | chr8:11,561,717-11,617,509 | AX-156297259 |
| GATA4 | rs62489350  | chr8:11,561,717-11,617,509 | AX-148862103 |
| GATA4 | rs62489350  | chr8:11,561,717-11,617,509 | AX-156282737 |
| GATA4 | rs11250160  | chr8:11,561,717-11,617,509 | AX-156293765 |
| GATA4 | rs73205114  | chr8:11,561,717-11,617,509 | AX-156277057 |
| GATA4 | ---         | chr8:11,561,717-11,617,509 | AX-119986538 |
| GATA4 | ---         | chr8:11,561,717-11,617,509 | AX-156277059 |
| GATA4 | ---         | chr8:11,561,717-11,617,509 | AX-151457597 |
| GATA4 | ---         | chr8:11,561,717-11,617,509 | AX-156283374 |
| GATA4 | rs149549675 | chr8:11,561,717-11,617,509 | AX-151452223 |
| GATA4 | rs149549675 | chr8:11,561,717-11,617,509 | AX-156284557 |
| GATA4 | rs11250162  | chr8:11,561,717-11,617,509 | AX-156277060 |

|       |             |                            |              |
|-------|-------------|----------------------------|--------------|
| GATA4 | rs11250162  | chr8:11,561,717-11,617,509 | AX-92632995  |
| GATA4 | rs138014561 | chr8:11,561,717-11,617,509 | AX-151322242 |
| GATA4 | rs57341427  | chr8:11,561,717-11,617,509 | AX-151371732 |
| GATA4 | rs57341427  | chr8:11,561,717-11,617,509 | AX-156277061 |
| GATA4 | rs10101661  | chr8:11,561,717-11,617,509 | AX-11092853  |
| GATA4 | rs12544504  | chr8:11,561,717-11,617,509 | AX-15831160  |
| GATA4 | rs59101725  | chr8:11,561,717-11,617,509 | AX-156293767 |
| GATA4 | rs34962960  | chr8:11,561,717-11,617,509 | AX-11455978  |
| GATA4 | rs558791663 | chr8:11,561,717-11,617,509 | AX-151407410 |
| GATA4 | rs558791663 | chr8:11,561,717-11,617,509 | AX-156277063 |
| GATA4 | rs12541318  | chr8:11,561,717-11,617,509 | AX-42309615  |
| GATA4 | rs1390950   | chr8:11,561,717-11,617,509 | AX-42309633  |
| GATA4 | rs2898295   | chr8:11,561,717-11,617,509 | AX-42309637  |
| GATA4 | rs7838131   | chr8:11,561,717-11,617,509 | AX-42309639  |
| GATA4 | rs10091294  | chr8:11,561,717-11,617,509 | AX-42309643  |
| GATA4 | rs11250163  | chr8:11,561,717-11,617,509 | AX-42309651  |
| GATA4 | rs62489351  | chr8:11,561,717-11,617,509 | AX-156277064 |
| GATA4 | rs62489351  | chr8:11,561,717-11,617,509 | AX-156293768 |
| GATA4 | rs6992190   | chr8:11,561,717-11,617,509 | AX-156293769 |
| GATA4 | rs34814359  | chr8:11,561,717-11,617,509 | AX-156268576 |
| GATA4 | rs34814359  | chr8:11,561,717-11,617,509 | AX-156288307 |
| GATA4 | rs7827193   | chr8:11,561,717-11,617,509 | AX-11648298  |
| GATA4 | rs4840580   | chr8:11,561,717-11,617,509 | AX-153743117 |
| GATA4 | rs141325404 | chr8:11,561,717-11,617,509 | AX-122418309 |
| GATA4 | rs141325404 | chr8:11,561,717-11,617,509 | AX-122602044 |
| GATA4 | rs200975160 | chr8:11,561,717-11,617,509 | AX-151125236 |
| GATA4 | rs200975160 | chr8:11,561,717-11,617,509 | AX-156298199 |
| GATA4 | rs7832153   | chr8:11,561,717-11,617,509 | AX-156268577 |
| GATA4 | rs7832153   | chr8:11,561,717-11,617,509 | AX-156288308 |
| GATA4 | rs7845076   | chr8:11,561,717-11,617,509 | AX-156282738 |
| GATA4 | rs7845076   | chr8:11,561,717-11,617,509 | AX-156297260 |
| GATA4 | rs11988920  | chr8:11,561,717-11,617,509 | AX-42309685  |
| GATA4 | rs11989007  | chr8:11,561,717-11,617,509 | AX-122983142 |
| GATA4 | rs11989007  | chr8:11,561,717-11,617,509 | AX-122983143 |
| GATA4 | rs2132713   | chr8:11,561,717-11,617,509 | AX-42309693  |
| GATA4 | rs2132714   | chr8:11,561,717-11,617,509 | AX-42309695  |
| GATA4 | rs10103483  | chr8:11,561,717-11,617,509 | AX-156282739 |
| GATA4 | rs10103483  | chr8:11,561,717-11,617,509 | AX-156297261 |
| GATA4 | rs10090884  | chr8:11,561,717-11,617,509 | AX-42309705  |
| GATA4 | rs66494852  | chr8:11,561,717-11,617,509 | AX-156282740 |
| GATA4 | rs66494852  | chr8:11,561,717-11,617,509 | AX-156297262 |
| GATA4 | rs62489352  | chr8:11,561,717-11,617,509 | AX-36427459  |
| GATA4 | rs201647948 | chr8:11,561,717-11,617,509 | AX-151287844 |
| GATA4 | rs201647948 | chr8:11,561,717-11,617,509 | AX-156284628 |
| GATA4 | rs11785912  | chr8:11,561,717-11,617,509 | AX-42309715  |
| GATA4 | rs9644751   | chr8:11,561,717-11,617,509 | AX-42309721  |
| GATA4 | rs73666003  | chr8:11,561,717-11,617,509 | AX-36427493  |
| GATA4 | rs13275657  | chr8:11,561,717-11,617,509 | AX-42309731  |
| GATA4 | ---         | chr8:11,561,717-11,617,509 | AX-36427541  |
| GATA4 | rs79676816  | chr8:11,561,717-11,617,509 | AX-156277066 |
| GATA4 | rs79676816  | chr8:11,561,717-11,617,509 | AX-156293770 |
| GATA4 | rs66535756  | chr8:11,561,717-11,617,509 | AX-36427561  |
| GATA4 | rs4841585   | chr8:11,561,717-11,617,509 | AX-148793393 |
| GATA4 | rs4841585   | chr8:11,561,717-11,617,509 | AX-156277067 |
| GATA4 | rs4841586   | chr8:11,561,717-11,617,509 | AX-156293771 |

|       |             |                            |              |
|-------|-------------|----------------------------|--------------|
| GATA4 | rs17153710  | chr8:11,561,717-11,617,509 | AX-42309761  |
| GATA4 | rs904006    | chr8:11,561,717-11,617,509 | AX-15831402  |
| GATA4 | rs76234685  | chr8:11,561,717-11,617,509 | AX-36427591  |
| GATA4 | rs28626371  | chr8:11,561,717-11,617,509 | AX-156277069 |
| GATA4 | rs28626371  | chr8:11,561,717-11,617,509 | AX-156293772 |
| GATA4 | rs28709984  | chr8:11,561,717-11,617,509 | AX-36427615  |
| GATA4 | rs2029969   | chr8:11,561,717-11,617,509 | AX-42309771  |
| GATA4 | rs28628715  | chr8:11,561,717-11,617,509 | AX-156277070 |
| GATA4 | rs28628715  | chr8:11,561,717-11,617,509 | AX-156293773 |
| GATA4 | rs2173117   | chr8:11,561,717-11,617,509 | AX-11372412  |
| GATA4 | rs73666006  | chr8:11,561,717-11,617,509 | AX-15831464  |
| GATA4 | rs2409814   | chr8:11,561,717-11,617,509 | AX-11390264  |
| GATA4 | rs2409814   | chr8:11,561,717-11,617,509 | AX-156277071 |
| GATA4 | rs3735819   | chr8:11,561,717-11,617,509 | AX-42309791  |
| GATA4 | rs10503425  | chr8:11,561,717-11,617,509 | AX-42309795  |
| GATA4 | ---         | chr8:11,561,717-11,617,509 | AX-90061990  |
| GATA4 | ---         | chr8:11,561,717-11,617,509 | AX-90063914  |
| GATA4 | ---         | chr8:11,561,717-11,617,509 | AX-90057705  |
| GATA4 | ---         | chr8:11,561,717-11,617,509 | AX-90054529  |
| GATA4 | rs398122402 | chr8:11,561,717-11,617,509 | AX-90054530  |
| GATA4 | ---         | chr8:11,561,717-11,617,509 | AX-90031941  |
| GATA4 | ---         | chr8:11,561,717-11,617,509 | AX-90077772  |
| GATA4 | ---         | chr8:11,561,717-11,617,509 | AX-90054531  |
| GATA4 | ---         | chr8:11,561,717-11,617,509 | AX-90025647  |
| GATA4 | ---         | chr8:11,561,717-11,617,509 | AX-90025648  |
| GATA4 | ---         | chr8:11,561,717-11,617,509 | AX-90025649  |
| GATA4 | ---         | chr8:11,561,717-11,617,509 | AX-90025650  |
| GATA4 | ---         | chr8:11,561,717-11,617,509 | AX-90064001  |
| GATA4 | ---         | chr8:11,561,717-11,617,509 | AX-90025651  |
| GATA4 | ---         | chr8:11,561,717-11,617,509 | AX-90025652  |
| GATA4 | ---         | chr8:11,561,717-11,617,509 | AX-90025653  |
| GATA4 | ---         | chr8:11,561,717-11,617,509 | AX-86640751  |
| GATA4 | ---         | chr8:11,561,717-11,617,509 | AX-90025654  |
| GATA4 | rs73539818  | chr8:11,561,717-11,617,509 | AX-15831484  |
| GATA4 | rs3779664   | chr8:11,561,717-11,617,509 | AX-42309803  |
| GATA4 | rs3735818   | chr8:11,561,717-11,617,509 | AX-42309807  |
| GATA4 | rs3735817   | chr8:11,561,717-11,617,509 | AX-15831490  |
| GATA4 | rs3735816   | chr8:11,561,717-11,617,509 | AX-122675115 |
| GATA4 | rs3735816   | chr8:11,561,717-11,617,509 | AX-156282741 |
| GATA4 | rs3735815   | chr8:11,561,717-11,617,509 | AX-113398363 |
| GATA4 | rs3735814   | chr8:11,561,717-11,617,509 | AX-15831491  |
| GATA4 | ---         | chr8:11,561,717-11,617,509 | AX-90054540  |
| GATA4 | ---         | chr8:11,561,717-11,617,509 | AX-90054542  |
| GATA4 | ---         | chr8:11,561,717-11,617,509 | AX-90054543  |
| GATA4 | rs387906771 | chr8:11,561,717-11,617,509 | AX-90054544  |
| GATA4 | ---         | chr8:11,561,717-11,617,509 | AX-90054545  |
| GATA4 | ---         | chr8:11,561,717-11,617,509 | AX-90054546  |
| GATA4 | ---         | chr8:11,561,717-11,617,509 | AX-90025662  |
| GATA4 | ---         | chr8:11,561,717-11,617,509 | AX-88757094  |
| GATA4 | ---         | chr8:11,561,717-11,617,509 | AX-90065516  |
| GATA4 | ---         | chr8:11,561,717-11,617,509 | AX-90054548  |
| GATA4 | rs3729848   | chr8:11,561,717-11,617,509 | AX-11476406  |
| GATA4 | rs3729849   | chr8:11,561,717-11,617,509 | AX-36427661  |
| GATA4 | rs7006733   | chr8:11,561,717-11,617,509 | AX-11600838  |
| GATA4 | rs2645396   | chr8:11,561,717-11,617,509 | AX-156277072 |

|       |             |                            |              |
|-------|-------------|----------------------------|--------------|
| GATA4 | rs2645396   | chr8:11,561,717-11,617,509 | AX-156293774 |
| GATA4 | rs10435714  | chr8:11,561,717-11,617,509 | AX-120708331 |
| GATA4 | rs10435714  | chr8:11,561,717-11,617,509 | AX-96648078  |
| GATA4 | rs10435718  | chr8:11,561,717-11,617,509 | AX-148267050 |
| GATA4 | rs10435718  | chr8:11,561,717-11,617,509 | AX-156268578 |
| GATA4 | rs34477636  | chr8:11,561,717-11,617,509 | AX-156268579 |
| GATA4 | rs12549359  | chr8:11,561,717-11,617,509 | AX-156288309 |
| GATA4 | rs2740434   | chr8:11,561,717-11,617,509 | AX-42309823  |
| GATA4 | rs2645398   | chr8:11,561,717-11,617,509 | AX-15831515  |
| GATA4 | rs17153740  | chr8:11,561,717-11,617,509 | AX-156268580 |
| GATA4 | rs17153740  | chr8:11,561,717-11,617,509 | AX-156288310 |
| GATA4 | rs2645399   | chr8:11,561,717-11,617,509 | AX-113868531 |
| GATA4 | rs2645399   | chr8:11,561,717-11,617,509 | AX-156288311 |
| GATA4 | rs28407037  | chr8:11,561,717-11,617,509 | AX-42309829  |
| GATA4 | rs2645400   | chr8:11,561,717-11,617,509 | AX-15831530  |
| GATA4 | rs17153743  | chr8:11,561,717-11,617,509 | AX-42309835  |
| GATA4 | rs73205195  | chr8:11,561,717-11,617,509 | AX-148784498 |
| GATA4 | rs73205195  | chr8:11,561,717-11,617,509 | AX-156268581 |
| GATA4 | rs35471251  | chr8:11,561,717-11,617,509 | AX-151469965 |
| GATA4 | rs35471251  | chr8:11,561,717-11,617,509 | AX-156284217 |
| GATA4 | rs36038176  | chr8:11,561,717-11,617,509 | AX-148518402 |
| GATA4 | rs36038176  | chr8:11,561,717-11,617,509 | AX-156268582 |
| GATA4 | rs11784693  | chr8:11,561,717-11,617,509 | AX-120720185 |
| GATA4 | rs11784693  | chr8:11,561,717-11,617,509 | AX-156297264 |
| GATA4 | rs11250164  | chr8:11,561,717-11,617,509 | AX-114330302 |
| GATA4 | rs11250164  | chr8:11,561,717-11,617,509 | AX-156297265 |
| GATA4 | rs804284    | chr8:11,561,717-11,617,509 | AX-42309857  |
| GATA4 | rs59433946  | chr8:11,561,717-11,617,509 | AX-36427731  |
| GATA4 | rs78129649  | chr8:11,561,717-11,617,509 | AX-156277073 |
| GATA4 | rs78129649  | chr8:11,561,717-11,617,509 | AX-156293775 |
| GATA4 | rs59431377  | chr8:11,561,717-11,617,509 | AX-36427737  |
| GATA4 | rs28565241  | chr8:11,561,717-11,617,509 | AX-36427743  |
| GATA4 | rs804283    | chr8:11,561,717-11,617,509 | AX-15831565  |
| GATA4 | rs810738    | chr8:11,561,717-11,617,509 | AX-15831567  |
| GATA4 | rs17153747  | chr8:11,561,717-11,617,509 | AX-12494808  |
| GATA4 | rs17153752  | chr8:11,561,717-11,617,509 | AX-42309859  |
| GATA4 | rs17153755  | chr8:11,561,717-11,617,509 | AX-11310792  |
| GATA4 | rs28665608  | chr8:11,561,717-11,617,509 | AX-36427757  |
| GATA4 | rs17153757  | chr8:11,561,717-11,617,509 | AX-36427759  |
| GATA4 | rs7826055   | chr8:11,561,717-11,617,509 | AX-15831579  |
| GATA4 | rs804282    | chr8:11,561,717-11,617,509 | AX-11661987  |
| GATA4 | rs79945119  | chr8:11,561,717-11,617,509 | AX-156293777 |
| GATA4 | rs804281    | chr8:11,561,717-11,617,509 | AX-148314768 |
| GATA4 | rs804281    | chr8:11,561,717-11,617,509 | AX-156277076 |
| GATA4 | rs73666008  | chr8:11,561,717-11,617,509 | AX-15831588  |
| GATA4 | rs13262643  | chr8:11,561,717-11,617,509 | AX-15831589  |
| GATA4 | rs67176365  | chr8:11,561,717-11,617,509 | AX-36427783  |
| GATA4 | rs13264774  | chr8:11,561,717-11,617,509 | AX-11247161  |
| GATA4 | rs13273672  | chr8:11,561,717-11,617,509 | AX-92585919  |
| GATA4 | rs387906772 | chr8:11,561,717-11,617,509 | AX-90054549  |
| GATA4 | rs56298569  | chr8:11,561,717-11,617,509 | AX-88800131  |
| GATA4 | ---         | chr8:11,561,717-11,617,509 | AX-90054551  |
| GATA4 | ---         | chr8:11,561,717-11,617,509 | AX-90062044  |
| GATA4 | rs804280    | chr8:11,561,717-11,617,509 | AX-11661981  |
| GATA4 | rs3729851   | chr8:11,561,717-11,617,509 | AX-11476408  |



|       |             |                            |              |
|-------|-------------|----------------------------|--------------|
| GATA4 | rs11987175  | chr8:11,561,717-11,617,509 | AX-36427797  |
| GATA4 | rs12677897  | chr8:11,561,717-11,617,509 | AX-42309887  |
| GATA4 | rs59648461  | chr8:11,561,717-11,617,509 | AX-15831605  |
| GATA4 | rs56700770  | chr8:11,561,717-11,617,509 | AX-151336365 |
| GATA4 | rs11987347  | chr8:11,561,717-11,617,509 | AX-151412576 |
| GATA4 | rs11987347  | chr8:11,561,717-11,617,509 | AX-156268584 |
| GATA4 | rs28438570  | chr8:11,561,717-11,617,509 | AX-156282742 |
| GATA4 | rs28438570  | chr8:11,561,717-11,617,509 | AX-156297266 |
| GATA4 | rs28550523  | chr8:11,561,717-11,617,509 | AX-15831612  |
| GATA4 | rs2645458   | chr8:11,561,717-11,617,509 | AX-42309903  |
| GATA4 | rs2645457   | chr8:11,561,717-11,617,509 | AX-11402989  |
| GATA4 | rs4841588   | chr8:11,561,717-11,617,509 | AX-156277078 |
| GATA4 | rs4841588   | chr8:11,561,717-11,617,509 | AX-156293779 |
| GATA4 | rs111272281 | chr8:11,561,717-11,617,509 | AX-107845365 |
| GATA4 | rs111272281 | chr8:11,561,717-11,617,509 | AX-156284728 |
| GATA4 | rs13250578  | chr8:11,561,717-11,617,509 | AX-156293780 |
| GATA4 | rs3729852   | chr8:11,561,717-11,617,509 | AX-156293781 |
| GATA4 | rs3729853   | chr8:11,561,717-11,617,509 | AX-36427871  |
| GATA4 | rs3729854   | chr8:11,561,717-11,617,509 | AX-11476409  |
| GATA4 | rs115372595 | chr8:11,561,717-11,617,509 | AX-68526405  |
| GATA4 | rs3729855   | chr8:11,561,717-11,617,509 | AX-15831621  |
| GATA4 | ---         | chr8:11,561,717-11,617,509 | AX-90058045  |
| GATA4 | ---         | chr8:11,561,717-11,617,509 | AX-90080066  |
| GATA4 | rs368489876 | chr8:11,561,717-11,617,509 | AX-86710452  |
| GATA4 | ---         | chr8:11,561,717-11,617,509 | AX-90071479  |
| GATA4 | ---         | chr8:11,561,717-11,617,509 | AX-94378677  |
| GATA4 | rs3729856   | chr8:11,561,717-11,617,509 | AX-11476410  |
| GATA4 | rs114868912 | chr8:11,561,717-11,617,509 | AX-36427877  |
| GATA4 | ---         | chr8:11,561,717-11,617,509 | AX-36427879  |
| GATA4 | rs3757949   | chr8:11,561,717-11,617,509 | AX-107888280 |
| GATA4 | rs3757949   | chr8:11,561,717-11,617,509 | AX-156288312 |
| GATA4 | rs73541819  | chr8:11,561,717-11,617,509 | AX-15831636  |
| GATA4 | rs2645456   | chr8:11,561,717-11,617,509 | AX-36427887  |
| GATA4 | rs809205    | chr8:11,561,717-11,617,509 | AX-42309923  |
| GATA4 | rs745379    | chr8:11,561,717-11,617,509 | AX-36427901  |
| GATA4 | ---         | chr8:11,561,717-11,617,509 | AX-90032250  |
| GATA4 | ---         | chr8:11,561,717-11,617,509 | AX-90054552  |
| GATA4 | ---         | chr8:11,561,717-11,617,509 | AX-90059735  |
| GATA4 | rs115099192 | chr8:11,561,717-11,617,509 | AX-38410685  |
| GATA4 | rs55633527  | chr8:11,561,717-11,617,509 | AX-83555177  |
| GATA4 | ---         | chr8:11,561,717-11,617,509 | AX-90054553  |
| GATA4 | ---         | chr8:11,561,717-11,617,509 | AX-90034720  |
| GATA4 | ---         | chr8:11,561,717-11,617,509 | AX-90037085  |
| GATA4 | ---         | chr8:11,561,717-11,617,509 | AX-90056773  |
| GATA4 | rs3729857   | chr8:11,561,717-11,617,509 | AX-42309929  |
| GATA4 | rs867858    | chr8:11,561,717-11,617,509 | AX-11670611  |
| GATA4 | rs1062219   | chr8:11,561,717-11,617,509 | AX-115089357 |
| GATA4 | rs884662    | chr8:11,561,717-11,617,509 | AX-113868018 |
| GATA4 | rs904018    | chr8:11,561,717-11,617,509 | AX-115089358 |
| GATA4 | rs904018    | chr8:11,561,717-11,617,509 | AX-156277080 |
| GATA4 | rs12825     | chr8:11,561,717-11,617,509 | AX-11228376  |
| GATA4 | rs804290    | chr8:11,561,717-11,617,509 | AX-42309945  |
| GATA4 | rs11785481  | chr8:11,561,717-11,617,509 | AX-11175451  |
| GATA4 | ---         | chr8:11,561,717-11,617,509 | AX-42309947  |
| GATA4 | rs1062270   | chr8:11,561,717-11,617,509 | AX-42309949  |

|       |             |                              |              |
|-------|-------------|------------------------------|--------------|
| GATA4 | ---         | chr8:11,561,717-11,617,509   | AX-42309955  |
| GLA   | rs144060196 | chrX:100,652,779-100,663,001 | AX-94371110  |
| GLA   | rs375661583 | chrX:100,652,779-100,663,001 | AX-86576904  |
| GLA   | ---         | chrX:100,652,779-100,663,001 | AX-94376463  |
| GLA   | ---         | chrX:100,652,779-100,663,001 | AX-86667712  |
| GLA   | rs147737890 | chrX:100,652,779-100,663,001 | AX-92022941  |
| GLA   | rs142217511 | chrX:100,652,779-100,663,001 | AX-94354356  |
| GLA   | rs28935490  | chrX:100,652,779-100,663,001 | AX-83005752  |
| GLA   | rs375538532 | chrX:100,652,779-100,663,001 | AX-86551236  |
| GLA   | rs140329381 | chrX:100,652,779-100,663,001 | AX-94303868  |
| GLA   | ---         | chrX:100,652,779-100,663,001 | AX-86701523  |
| GLA   | ---         | chrX:100,652,779-100,663,001 | AX-86683286  |
| GLA   | rs147026639 | chrX:100,652,779-100,663,001 | AX-94354361  |
| GLA   | rs2071397   | chrX:100,652,779-100,663,001 | AX-11365353  |
| GLA   | rs113959597 | chrX:100,652,779-100,663,001 | AX-88801032  |
| GLA   | ---         | chrX:100,652,779-100,663,001 | AX-83202120  |
| GLA   | rs150228150 | chrX:100,652,779-100,663,001 | AX-94371113  |
| GLA   | rs138886989 | chrX:100,652,779-100,663,001 | AX-83068458  |
| GLA   | rs149391489 | chrX:100,652,779-100,663,001 | AX-83164487  |
| GLA   | rs143768851 | chrX:100,652,779-100,663,001 | AX-94371109  |
| GLA   | rs148158093 | chrX:100,652,779-100,663,001 | AX-83504480  |
| GLA   | ---         | chrX:100,652,779-100,663,001 | AX-86553962  |
| GLA   | rs142449183 | chrX:100,652,779-100,663,001 | AX-94371107  |
| ILK   | ---         | chr11:6,624,964-6,632,099    | AX-30202297  |
| ILK   | rs114115159 | chr11:6,624,964-6,632,099    | AX-83097218  |
| ILK   | rs55802517  | chr11:6,624,964-6,632,099    | AX-156270565 |
| ILK   | rs55802517  | chr11:6,624,964-6,632,099    | AX-156289360 |
| ILK   | rs12272856  | chr11:6,624,964-6,632,099    | AX-30202395  |
| ILK   | rs4758439   | chr11:6,624,964-6,632,099    | AX-16665976  |
| ILK   | rs4758440   | chr11:6,624,964-6,632,099    | AX-156270566 |
| ILK   | rs4758440   | chr11:6,624,964-6,632,099    | AX-156289361 |
| ILK   | rs72055783  | chr11:6,624,964-6,632,099    | AX-122530927 |
| ILK   | rs4758441   | chr11:6,624,964-6,632,099    | AX-11523874  |
| ILK   | rs4758442   | chr11:6,624,964-6,632,099    | AX-88734406  |
| ILK   | rs4758442   | chr11:6,624,964-6,632,099    | AX-88777451  |
| ILK   | rs11368764  | chr11:6,624,964-6,632,099    | AX-156286739 |
| ILK   | rs6578765   | chr11:6,624,964-6,632,099    | AX-148076073 |
| ILK   | rs6578766   | chr11:6,624,964-6,632,099    | AX-156266130 |
| ILK   | rs6578766   | chr11:6,624,964-6,632,099    | AX-156286740 |
| ILK   | rs11605114  | chr11:6,624,964-6,632,099    | AX-11161930  |
| ILK   | rs66682453  | chr11:6,624,964-6,632,099    | AX-156284829 |
| ILK   | rs7937456   | chr11:6,624,964-6,632,099    | AX-30202471  |
| ILK   | rs7938444   | chr11:6,624,964-6,632,099    | AX-156286741 |
| ILK   | rs79548722  | chr11:6,624,964-6,632,099    | AX-156283669 |
| ILK   | rs2555175   | chr11:6,624,964-6,632,099    | AX-11398311  |
| ILK   | rs68155159  | chr11:6,624,964-6,632,099    | AX-107796408 |
| ILK   | rs68155159  | chr11:6,624,964-6,632,099    | AX-156298436 |
| ILK   | rs2243625   | chr11:6,624,964-6,632,099    | AX-16665999  |
| ILK   | rs2255405   | chr11:6,624,964-6,632,099    | AX-12523011  |
| ILK   | rs11602107  | chr11:6,624,964-6,632,099    | AX-30202553  |
| ILK   | rs3741271   | chr11:6,624,964-6,632,099    | AX-30202599  |
| ILK   | rs2255538   | chr11:6,624,964-6,632,099    | AX-39139949  |
| ILK   | rs2048092   | chr11:6,624,964-6,632,099    | AX-39139957  |
| ILK   | rs1043388   | chr11:6,624,964-6,632,099    | AX-39139961  |
| ILK   | ---         | chr11:6,624,964-6,632,099    | AX-113737992 |

|       |             |                             |              |
|-------|-------------|-----------------------------|--------------|
| ILK   | ---         | chr11:6,624,964-6,632,099   | AX-156297637 |
| ILK   | rs11314683  | chr11:6,624,964-6,632,099   | AX-83524345  |
| ILK   | rs11826498  | chr11:6,624,964-6,632,099   | AX-156265651 |
| ILK   | rs11826498  | chr11:6,624,964-6,632,099   | AX-156265686 |
| ILK   | rs140322345 | chr11:6,624,964-6,632,099   | AX-83563699  |
| ILK   | rs1043390   | chr11:6,624,964-6,632,099   | AX-30202767  |
| ILK   | rs2292195   | chr11:6,624,964-6,632,099   | AX-11382504  |
| ILK   | ---         | chr11:6,624,964-6,632,099   | AX-86675509  |
| JAG1  | rs8708      | chr20:10,618,332-10,654,694 | AX-13471697  |
| JAG1  | rs45534738  | chr20:10,618,332-10,654,694 | AX-11510724  |
| JAG1  | rs138007561 | chr20:10,618,332-10,654,694 | AX-83275550  |
| JAG1  | rs6040050   | chr20:10,618,332-10,654,694 | AX-40493131  |
| JAG1  | rs75617279  | chr20:10,618,332-10,654,694 | AX-83241589  |
| JAG1  | rs145895196 | chr20:10,618,332-10,654,694 | AX-83309298  |
| JAG1  | rs35761929  | chr20:10,618,332-10,654,694 | AX-32837803  |
| JAG1  | rs147809756 | chr20:10,618,332-10,654,694 | AX-83231580  |
| JAG1  | rs1801140   | chr20:10,618,332-10,654,694 | AX-11344690  |
| JAG1  | rs35851937  | chr20:10,618,332-10,654,694 | AX-32837827  |
| JAG1  | rs544547916 | chr20:10,618,332-10,654,694 | AX-83286749  |
| JAG1  | rs35308216  | chr20:10,618,332-10,654,694 | AX-32837833  |
| JAG1  | rs6077864   | chr20:10,618,332-10,654,694 | AX-32837841  |
| JAG1  | rs35793014  | chr20:10,618,332-10,654,694 | AX-12557509  |
| JAG1  | ---         | chr20:10,618,332-10,654,694 | AX-40493151  |
| JAG1  | rs6040055   | chr20:10,618,332-10,654,694 | AX-11556489  |
| JAG1  | rs75809680  | chr20:10,618,332-10,654,694 | AX-13471708  |
| JAG1  | rs62185094  | chr20:10,618,332-10,654,694 | AX-13471712  |
| JAG1  | rs2273061   | chr20:10,618,332-10,654,694 | AX-40493157  |
| JAG1  | rs3748480   | chr20:10,618,332-10,654,694 | AX-11477884  |
| JAG1  | rs6133987   | chr20:10,618,332-10,654,694 | AX-40493189  |
| JAG1  | rs2235810   | chr20:10,618,332-10,654,694 | AX-32837919  |
| KCNE1 | rs73363349  | chr21:35,818,986-35,828,107 | AX-33245987  |
| KCNE1 | rs11909074  | chr21:35,818,986-35,828,107 | AX-40688999  |
| KCNE1 | ---         | chr21:35,818,986-35,828,107 | AX-90031412  |
| KCNE1 | rs142511345 | chr21:35,818,986-35,828,107 | AX-86686153  |
| KCNE1 | ---         | chr21:35,818,986-35,828,107 | AX-90064816  |
| KCNE1 | ---         | chr21:35,818,986-35,828,107 | AX-86631626  |
| KCNE1 | ---         | chr21:35,818,986-35,828,107 | AX-90033348  |
| KCNE1 | rs1805128   | chr21:35,818,986-35,828,107 | AX-11344915  |
| KCNE1 | rs199473360 | chr21:35,818,986-35,828,107 | AX-90034239  |
| KCNE1 | ---         | chr21:35,818,986-35,828,107 | AX-90061783  |
| KCNE1 | rs74315445  | chr21:35,818,986-35,828,107 | AX-86728661  |
| KCNE1 | rs74315446  | chr21:35,818,986-35,828,107 | AX-90039555  |
| KCNE1 | ---         | chr21:35,818,986-35,828,107 | AX-90062070  |
| KCNE1 | rs79654911  | chr21:35,818,986-35,828,107 | AX-90070522  |
| KCNE1 | ---         | chr21:35,818,986-35,828,107 | AX-90028861  |
| KCNE1 | ---         | chr21:35,818,986-35,828,107 | AX-90061015  |
| KCNE1 | rs147187721 | chr21:35,818,986-35,828,107 | AX-86632330  |
| KCNE1 | rs199473644 | chr21:35,818,986-35,828,107 | AX-86707171  |
| KCNE1 | ---         | chr21:35,818,986-35,828,107 | AX-90035711  |
| KCNE1 | ---         | chr21:35,818,986-35,828,107 | AX-90028144  |
| KCNE1 | ---         | chr21:35,818,986-35,828,107 | AX-90056334  |
| KCNE1 | rs1805127   | chr21:35,818,986-35,828,107 | AX-13660397  |
| KCNE1 | rs17173510  | chr21:35,818,986-35,828,107 | AX-11312351  |
| KCNE1 | ---         | chr21:35,818,986-35,828,107 | AX-86593770  |
| KCNE1 | ---         | chr21:35,818,986-35,828,107 | AX-90030238  |

|       |             |                              |              |
|-------|-------------|------------------------------|--------------|
| KCNE1 | ---         | chr21:35,818,986-35,828,107  | AX-90034575  |
| KCNE1 | rs144917638 | chr21:35,818,986-35,828,107  | AX-86676005  |
| KCNE1 | rs199473348 | chr21:35,818,986-35,828,107  | AX-86652928  |
| KCNE1 | ---         | chr21:35,818,986-35,828,107  | AX-90046829  |
| KCNE1 | ---         | chr21:35,818,986-35,828,107  | AX-90044154  |
| KCNE1 | rs55857049  | chr21:35,818,986-35,828,107  | AX-33246011  |
| KCNE1 | rs79687087  | chr21:35,818,986-35,828,107  | AX-13660399  |
| KCNE1 | rs1547356   | chr21:35,818,986-35,828,107  | AX-13660400  |
| KCNE1 | rs1547357   | chr21:35,818,986-35,828,107  | AX-40689013  |
| KCNE1 | rs9976263   | chr21:35,818,986-35,828,107  | AX-13660409  |
| KCNE1 | rs7277999   | chr21:35,818,986-35,828,107  | AX-12626610  |
| KCNE2 | rs4816481   | chr21:35,736,323-35,743,440  | AX-11528518  |
| KCNE2 | rs11702830  | chr21:35,736,323-35,743,440  | AX-11169026  |
| KCNE2 | rs12481733  | chr21:35,736,323-35,743,440  | AX-40688763  |
| KCNE2 | rs12483695  | chr21:35,736,323-35,743,440  | AX-40688765  |
| KCNE2 | rs2234916   | chr21:35,736,323-35,743,440  | AX-82888319  |
| KCNE2 | ---         | chr21:35,736,323-35,743,440  | AX-13660085  |
| KCNE2 | ---         | chr21:35,736,323-35,743,440  | AX-90032433  |
| KCNE2 | rs142153692 | chr21:35,736,323-35,743,440  | AX-83278271  |
| KCNE2 | ---         | chr21:35,736,323-35,743,440  | AX-90058849  |
| KCNE2 | rs74315449  | chr21:35,736,323-35,743,440  | AX-86687780  |
| KCNE2 | rs148968498 | chr21:35,736,323-35,743,440  | AX-86741030  |
| KCNE2 | ---         | chr21:35,736,323-35,743,440  | AX-90048538  |
| KCNE2 | ---         | chr21:35,736,323-35,743,440  | AX-86687985  |
| KCNE2 | rs74315447  | chr21:35,736,323-35,743,440  | AX-83413041  |
| KCNE2 | rs74315448  | chr21:35,736,323-35,743,440  | AX-83476889  |
| KCNE2 | rs16991654  | chr21:35,736,323-35,743,440  | AX-90037861  |
| KCNE2 | ---         | chr21:35,736,323-35,743,440  | AX-86556188  |
| KCNE2 | ---         | chr21:35,736,323-35,743,440  | AX-90028179  |
| KCNE2 | rs141423405 | chr21:35,736,323-35,743,440  | AX-86683323  |
| KCNE2 | rs199473365 | chr21:35,736,323-35,743,440  | AX-86688906  |
| KCNE2 | rs74424227  | chr21:35,736,323-35,743,440  | AX-90068833  |
| KCNE2 | ---         | chr21:35,736,323-35,743,440  | AX-86580727  |
| KCNE2 | rs45610936  | chr21:35,736,323-35,743,440  | AX-86681645  |
| KCNH2 | ---         | chr7:150,642,044-150,675,402 | AX-90063331  |
| KCNH2 | ---         | chr7:150,642,044-150,675,402 | AX-90043291  |
| KCNH2 | ---         | chr7:150,642,044-150,675,402 | AX-90064023  |
| KCNH2 | ---         | chr7:150,642,044-150,675,402 | AX-90033511  |
| KCNH2 | rs146664701 | chr7:150,642,044-150,675,402 | AX-121467398 |
| KCNH2 | rs146664701 | chr7:150,642,044-150,675,402 | AX-156284945 |
| KCNH2 | ---         | chr7:150,642,044-150,675,402 | AX-90051494  |
| KCNH2 | ---         | chr7:150,642,044-150,675,402 | AX-90058581  |
| KCNH2 | rs199473028 | chr7:150,642,044-150,675,402 | AX-86726114  |
| KCNH2 | ---         | chr7:150,642,044-150,675,402 | AX-90036272  |
| KCNH2 | ---         | chr7:150,642,044-150,675,402 | AX-90033529  |
| KCNH2 | ---         | chr7:150,642,044-150,675,402 | AX-90079290  |
| KCNH2 | ---         | chr7:150,642,044-150,675,402 | AX-90050717  |
| KCNH2 | ---         | chr7:150,642,044-150,675,402 | AX-90045457  |
| KCNH2 | ---         | chr7:150,642,044-150,675,402 | AX-90033198  |
| KCNH2 | ---         | chr7:150,642,044-150,675,402 | AX-90049724  |
| KCNH2 | rs36210421  | chr7:150,642,044-150,675,402 | AX-83580519  |
| KCNH2 | ---         | chr7:150,642,044-150,675,402 | AX-90064890  |
| KCNH2 | ---         | chr7:150,642,044-150,675,402 | AX-90057928  |
| KCNH2 | ---         | chr7:150,642,044-150,675,402 | AX-90052579  |
| KCNH2 | ---         | chr7:150,642,044-150,675,402 | AX-90060220  |

|       |             |                              |             |
|-------|-------------|------------------------------|-------------|
| KCNH2 | ---         | chr7:150,642,044-150,675,402 | AX-90045070 |
| KCNH2 | ---         | chr7:150,642,044-150,675,402 | AX-90046038 |
| KCNH2 | ---         | chr7:150,642,044-150,675,402 | AX-90073625 |
| KCNH2 | ---         | chr7:150,642,044-150,675,402 | AX-90078481 |
| KCNH2 | ---         | chr7:150,642,044-150,675,402 | AX-90062458 |
| KCNH2 | ---         | chr7:150,642,044-150,675,402 | AX-90064191 |
| KCNH2 | ---         | chr7:150,642,044-150,675,402 | AX-90080816 |
| KCNH2 | ---         | chr7:150,642,044-150,675,402 | AX-86663258 |
| KCNH2 | ---         | chr7:150,642,044-150,675,402 | AX-90072742 |
| KCNH2 | ---         | chr7:150,642,044-150,675,402 | AX-86550370 |
| KCNH2 | ---         | chr7:150,642,044-150,675,402 | AX-90078192 |
| KCNH2 | rs121912509 | chr7:150,642,044-150,675,402 | AX-90071171 |
| KCNH2 | ---         | chr7:150,642,044-150,675,402 | AX-90065520 |
| KCNH2 | ---         | chr7:150,642,044-150,675,402 | AX-90060317 |
| KCNH2 | ---         | chr7:150,642,044-150,675,402 | AX-90075976 |
| KCNH2 | ---         | chr7:150,642,044-150,675,402 | AX-90080662 |
| KCNH2 | rs149955375 | chr7:150,642,044-150,675,402 | AX-83052666 |
| KCNH2 | ---         | chr7:150,642,044-150,675,402 | AX-90033904 |
| KCNH2 | ---         | chr7:150,642,044-150,675,402 | AX-90074113 |
| KCNH2 | ---         | chr7:150,642,044-150,675,402 | AX-90029917 |
| KCNH2 | ---         | chr7:150,642,044-150,675,402 | AX-90064063 |
| KCNH2 | ---         | chr7:150,642,044-150,675,402 | AX-90064477 |
| KCNH2 | ---         | chr7:150,642,044-150,675,402 | AX-90078860 |
| KCNH2 | ---         | chr7:150,642,044-150,675,402 | AX-90056038 |
| KCNH2 | ---         | chr7:150,642,044-150,675,402 | AX-90073908 |
| KCNH2 | rs6948860   | chr7:150,642,044-150,675,402 | AX-96744308 |
| KCNH2 | rs6948860   | chr7:150,642,044-150,675,402 | AX-96746519 |
| KCNH2 | rs1805123   | chr7:150,642,044-150,675,402 | AX-42143543 |
| KCNH2 | ---         | chr7:150,642,044-150,675,402 | AX-90078194 |
| KCNH2 | ---         | chr7:150,642,044-150,675,402 | AX-90060780 |
| KCNH2 | ---         | chr7:150,642,044-150,675,402 | AX-90073776 |
| KCNH2 | ---         | chr7:150,642,044-150,675,402 | AX-90065694 |
| KCNH2 | rs199473432 | chr7:150,642,044-150,675,402 | AX-90030835 |
| KCNH2 | ---         | chr7:150,642,044-150,675,402 | AX-90043042 |
| KCNH2 | rs143512106 | chr7:150,642,044-150,675,402 | AX-83336883 |
| KCNH2 | ---         | chr7:150,642,044-150,675,402 | AX-90030926 |
| KCNH2 | ---         | chr7:150,642,044-150,675,402 | AX-90052213 |
| KCNH2 | ---         | chr7:150,642,044-150,675,402 | AX-90034191 |
| KCNH2 | ---         | chr7:150,642,044-150,675,402 | AX-90043266 |
| KCNH2 | rs2968860   | chr7:150,642,044-150,675,402 | AX-96986338 |
| KCNH2 | ---         | chr7:150,642,044-150,675,402 | AX-90062016 |
| KCNH2 | ---         | chr7:150,642,044-150,675,402 | AX-90064923 |
| KCNH2 | ---         | chr7:150,642,044-150,675,402 | AX-90065534 |
| KCNH2 | ---         | chr7:150,642,044-150,675,402 | AX-86616384 |
| KCNH2 | ---         | chr7:150,642,044-150,675,402 | AX-90055887 |
| KCNH2 | ---         | chr7:150,642,044-150,675,402 | AX-90064918 |
| KCNH2 | ---         | chr7:150,642,044-150,675,402 | AX-90027859 |
| KCNH2 | ---         | chr7:150,642,044-150,675,402 | AX-90081211 |
| KCNH2 | ---         | chr7:150,642,044-150,675,402 | AX-90060567 |
| KCNH2 | ---         | chr7:150,642,044-150,675,402 | AX-90059390 |
| KCNH2 | ---         | chr7:150,642,044-150,675,402 | AX-90057280 |
| KCNH2 | ---         | chr7:150,642,044-150,675,402 | AX-90031876 |
| KCNH2 | ---         | chr7:150,642,044-150,675,402 | AX-90057233 |
| KCNH2 | ---         | chr7:150,642,044-150,675,402 | AX-90050053 |
| KCNH2 | ---         | chr7:150,642,044-150,675,402 | AX-90036551 |

|       |             |                              |              |
|-------|-------------|------------------------------|--------------|
| KCNH2 | rs121912506 | chr7:150,642,044-150,675,402 | AX-90071168  |
| KCNH2 | rs121912510 | chr7:150,642,044-150,675,402 | AX-90071172  |
| KCNH2 | ---         | chr7:150,642,044-150,675,402 | AX-90029310  |
| KCNH2 | ---         | chr7:150,642,044-150,675,402 | AX-90027455  |
| KCNH2 | ---         | chr7:150,642,044-150,675,402 | AX-90061346  |
| KCNH2 | ---         | chr7:150,642,044-150,675,402 | AX-90029742  |
| KCNH2 | ---         | chr7:150,642,044-150,675,402 | AX-90075325  |
| KCNH2 | ---         | chr7:150,642,044-150,675,402 | AX-90033828  |
| KCNH2 | ---         | chr7:150,642,044-150,675,402 | AX-90032062  |
| KCNH2 | ---         | chr7:150,642,044-150,675,402 | AX-90058144  |
| KCNH2 | ---         | chr7:150,642,044-150,675,402 | AX-90061116  |
| KCNH2 | ---         | chr7:150,642,044-150,675,402 | AX-90058919  |
| KCNH2 | ---         | chr7:150,642,044-150,675,402 | AX-90063349  |
| KCNH2 | ---         | chr7:150,642,044-150,675,402 | AX-90078993  |
| KCNH2 | rs138498207 | chr7:150,642,044-150,675,402 | AX-83204515  |
| KCNH2 | ---         | chr7:150,642,044-150,675,402 | AX-90057696  |
| KCNH2 | ---         | chr7:150,642,044-150,675,402 | AX-90062650  |
| KCNH2 | ---         | chr7:150,642,044-150,675,402 | AX-90028120  |
| KCNH2 | ---         | chr7:150,642,044-150,675,402 | AX-90065341  |
| KCNH2 | ---         | chr7:150,642,044-150,675,402 | AX-90052255  |
| KCNH2 | ---         | chr7:150,642,044-150,675,402 | AX-90056144  |
| KCNH2 | ---         | chr7:150,642,044-150,675,402 | AX-90037313  |
| KCNH2 | ---         | chr7:150,642,044-150,675,402 | AX-90031790  |
| KCNH2 | ---         | chr7:150,642,044-150,675,402 | AX-90081441  |
| KCNH2 | ---         | chr7:150,642,044-150,675,402 | AX-90028483  |
| KCNH2 | rs121912512 | chr7:150,642,044-150,675,402 | AX-86642816  |
| KCNH2 | ---         | chr7:150,642,044-150,675,402 | AX-90028601  |
| KCNH2 | ---         | chr7:150,642,044-150,675,402 | AX-90032275  |
| KCNH2 | ---         | chr7:150,642,044-150,675,402 | AX-90076090  |
| KCNH2 | ---         | chr7:150,642,044-150,675,402 | AX-90049020  |
| KCNH2 | ---         | chr7:150,642,044-150,675,402 | AX-90065769  |
| KCNH2 | ---         | chr7:150,642,044-150,675,402 | AX-90077955  |
| KCNH2 | ---         | chr7:150,642,044-150,675,402 | AX-90055943  |
| KCNH2 | ---         | chr7:150,642,044-150,675,402 | AX-90028110  |
| KCNH2 | ---         | chr7:150,642,044-150,675,402 | AX-90077270  |
| KCNH2 | ---         | chr7:150,642,044-150,675,402 | AX-90059692  |
| KCNH2 | ---         | chr7:150,642,044-150,675,402 | AX-90032469  |
| KCNH2 | ---         | chr7:150,642,044-150,675,402 | AX-90048117  |
| KCNH2 | rs4725983   | chr7:150,642,044-150,675,402 | AX-112919529 |
| KCNH2 | rs2072413   | chr7:150,642,044-150,675,402 | AX-96922360  |
| KCNH2 | rs2072412   | chr7:150,642,044-150,675,402 | AX-113404865 |
| KCNH2 | ---         | chr7:150,642,044-150,675,402 | AX-90059365  |
| KCNH2 | rs199473532 | chr7:150,642,044-150,675,402 | AX-86638542  |
| KCNH2 | ---         | chr7:150,642,044-150,675,402 | AX-90033349  |
| KCNH2 | ---         | chr7:150,642,044-150,675,402 | AX-90059002  |
| KCNH2 | ---         | chr7:150,642,044-150,675,402 | AX-90065339  |
| KCNH2 | ---         | chr7:150,642,044-150,675,402 | AX-90036018  |
| KCNH2 | ---         | chr7:150,642,044-150,675,402 | AX-90032569  |
| KCNH2 | ---         | chr7:150,642,044-150,675,402 | AX-90034407  |
| KCNH2 | ---         | chr7:150,642,044-150,675,402 | AX-90027463  |
| KCNH2 | ---         | chr7:150,642,044-150,675,402 | AX-90030612  |
| KCNH2 | ---         | chr7:150,642,044-150,675,402 | AX-90081405  |
| KCNH2 | ---         | chr7:150,642,044-150,675,402 | AX-90079999  |
| KCNH2 | ---         | chr7:150,642,044-150,675,402 | AX-90050866  |
| KCNH2 | ---         | chr7:150,642,044-150,675,402 | AX-90057492  |

|       |           |                              |             |
|-------|-----------|------------------------------|-------------|
| KCNH2 | ---       | chr7:150,642,044-150,675,402 | AX-90064104 |
| KCNH2 | ---       | chr7:150,642,044-150,675,402 | AX-90061762 |
| KCNH2 | ---       | chr7:150,642,044-150,675,402 | AX-90030973 |
| KCNH2 | ---       | chr7:150,642,044-150,675,402 | AX-90032267 |
| KCNH2 | ---       | chr7:150,642,044-150,675,402 | AX-90031265 |
| KCNH2 | rs1137617 | chr7:150,642,044-150,675,402 | AX-36091005 |
| KCNH2 | ---       | chr7:150,642,044-150,675,402 | AX-90056511 |
| KCNH2 | ---       | chr7:150,642,044-150,675,402 | AX-90056415 |
| KCNH2 | ---       | chr7:150,642,044-150,675,402 | AX-90037272 |
| KCNH2 | ---       | chr7:150,642,044-150,675,402 | AX-90032575 |
| KCNH2 | ---       | chr7:150,642,044-150,675,402 | AX-90060704 |
| KCNH2 | ---       | chr7:150,642,044-150,675,402 | AX-90033275 |
| KCNH2 | ---       | chr7:150,642,044-150,675,402 | AX-90060108 |
| KCNH2 | ---       | chr7:150,642,044-150,675,402 | AX-90062356 |
| KCNH2 | ---       | chr7:150,642,044-150,675,402 | AX-90072213 |
| KCNH2 | ---       | chr7:150,642,044-150,675,402 | AX-90063426 |
| KCNH2 | ---       | chr7:150,642,044-150,675,402 | AX-90056444 |
| KCNH2 | ---       | chr7:150,642,044-150,675,402 | AX-90074169 |
| KCNH2 | ---       | chr7:150,642,044-150,675,402 | AX-90034461 |
| KCNH2 | ---       | chr7:150,642,044-150,675,402 | AX-90057951 |
| KCNH2 | ---       | chr7:150,642,044-150,675,402 | AX-90064630 |
| KCNH2 | ---       | chr7:150,642,044-150,675,402 | AX-90031330 |
| KCNH2 | ---       | chr7:150,642,044-150,675,402 | AX-90058307 |
| KCNH2 | ---       | chr7:150,642,044-150,675,402 | AX-90065098 |
| KCNH2 | ---       | chr7:150,642,044-150,675,402 | AX-90058354 |
| KCNH2 | ---       | chr7:150,642,044-150,675,402 | AX-90064088 |
| KCNH2 | ---       | chr7:150,642,044-150,675,402 | AX-90030711 |
| KCNH2 | ---       | chr7:150,642,044-150,675,402 | AX-90036983 |
| KCNH2 | ---       | chr7:150,642,044-150,675,402 | AX-90030562 |
| KCNH2 | ---       | chr7:150,642,044-150,675,402 | AX-90062514 |
| KCNH2 | ---       | chr7:150,642,044-150,675,402 | AX-90032159 |
| KCNH2 | ---       | chr7:150,642,044-150,675,402 | AX-90061157 |
| KCNH2 | ---       | chr7:150,642,044-150,675,402 | AX-90034675 |
| KCNH2 | ---       | chr7:150,642,044-150,675,402 | AX-90055940 |
| KCNH2 | ---       | chr7:150,642,044-150,675,402 | AX-90059132 |
| KCNH2 | ---       | chr7:150,642,044-150,675,402 | AX-90058615 |
| KCNH2 | ---       | chr7:150,642,044-150,675,402 | AX-90033491 |
| KCNH2 | ---       | chr7:150,642,044-150,675,402 | AX-90064169 |
| KCNH2 | ---       | chr7:150,642,044-150,675,402 | AX-90057534 |
| KCNH2 | ---       | chr7:150,642,044-150,675,402 | AX-90027810 |
| KCNH2 | ---       | chr7:150,642,044-150,675,402 | AX-90060477 |
| KCNH2 | ---       | chr7:150,642,044-150,675,402 | AX-90063669 |
| KCNH2 | ---       | chr7:150,642,044-150,675,402 | AX-90057843 |
| KCNH2 | ---       | chr7:150,642,044-150,675,402 | AX-90060083 |
| KCNH2 | ---       | chr7:150,642,044-150,675,402 | AX-90063258 |
| KCNH2 | ---       | chr7:150,642,044-150,675,402 | AX-90062948 |
| KCNH2 | ---       | chr7:150,642,044-150,675,402 | AX-90061229 |
| KCNH2 | ---       | chr7:150,642,044-150,675,402 | AX-90030659 |
| KCNH2 | ---       | chr7:150,642,044-150,675,402 | AX-90032622 |
| KCNH2 | ---       | chr7:150,642,044-150,675,402 | AX-90036389 |
| KCNH2 | ---       | chr7:150,642,044-150,675,402 | AX-90064251 |
| KCNH2 | ---       | chr7:150,642,044-150,675,402 | AX-90061502 |
| KCNH2 | ---       | chr7:150,642,044-150,675,402 | AX-90034873 |
| KCNH2 | ---       | chr7:150,642,044-150,675,402 | AX-90036724 |
| KCNH2 | ---       | chr7:150,642,044-150,675,402 | AX-90059245 |

|       |             |                              |             |
|-------|-------------|------------------------------|-------------|
| KCNH2 | ---         | chr7:150,642,044-150,675,402 | AX-90060342 |
| KCNH2 | ---         | chr7:150,642,044-150,675,402 | AX-90032692 |
| KCNH2 | ---         | chr7:150,642,044-150,675,402 | AX-90032517 |
| KCNH2 | ---         | chr7:150,642,044-150,675,402 | AX-90059511 |
| KCNH2 | ---         | chr7:150,642,044-150,675,402 | AX-90057263 |
| KCNH2 | ---         | chr7:150,642,044-150,675,402 | AX-90062609 |
| KCNH2 | ---         | chr7:150,642,044-150,675,402 | AX-90034547 |
| KCNH2 | ---         | chr7:150,642,044-150,675,402 | AX-90060469 |
| KCNH2 | ---         | chr7:150,642,044-150,675,402 | AX-90055952 |
| KCNH2 | ---         | chr7:150,642,044-150,675,402 | AX-90059790 |
| KCNH2 | ---         | chr7:150,642,044-150,675,402 | AX-90061672 |
| KCNH2 | ---         | chr7:150,642,044-150,675,402 | AX-90032117 |
| KCNH2 | ---         | chr7:150,642,044-150,675,402 | AX-90028657 |
| KCNH2 | ---         | chr7:150,642,044-150,675,402 | AX-90031242 |
| KCNH2 | ---         | chr7:150,642,044-150,675,402 | AX-90036831 |
| KCNH2 | ---         | chr7:150,642,044-150,675,402 | AX-90033489 |
| KCNH2 | ---         | chr7:150,642,044-150,675,402 | AX-90060702 |
| KCNH2 | rs121912508 | chr7:150,642,044-150,675,402 | AX-90042285 |
| KCNH2 | ---         | chr7:150,642,044-150,675,402 | AX-90059314 |
| KCNH2 | ---         | chr7:150,642,044-150,675,402 | AX-90062339 |
| KCNH2 | ---         | chr7:150,642,044-150,675,402 | AX-90077203 |
| KCNH2 | ---         | chr7:150,642,044-150,675,402 | AX-90060262 |
| KCNH2 | ---         | chr7:150,642,044-150,675,402 | AX-90033431 |
| KCNH2 | ---         | chr7:150,642,044-150,675,402 | AX-90027003 |
| KCNH2 | ---         | chr7:150,642,044-150,675,402 | AX-90027895 |
| KCNH2 | ---         | chr7:150,642,044-150,675,402 | AX-90034315 |
| KCNH2 | ---         | chr7:150,642,044-150,675,402 | AX-90031478 |
| KCNH2 | ---         | chr7:150,642,044-150,675,402 | AX-90033518 |
| KCNH2 | ---         | chr7:150,642,044-150,675,402 | AX-90029359 |
| KCNH2 | ---         | chr7:150,642,044-150,675,402 | AX-90048694 |
| KCNH2 | ---         | chr7:150,642,044-150,675,402 | AX-90033408 |
| KCNH2 | ---         | chr7:150,642,044-150,675,402 | AX-90057794 |
| KCNH2 | ---         | chr7:150,642,044-150,675,402 | AX-90064589 |
| KCNH2 | ---         | chr7:150,642,044-150,675,402 | AX-90061046 |
| KCNH2 | rs1805121   | chr7:150,642,044-150,675,402 | AX-42143551 |
| KCNH2 | ---         | chr7:150,642,044-150,675,402 | AX-90062659 |
| KCNH2 | ---         | chr7:150,642,044-150,675,402 | AX-90065681 |
| KCNH2 | ---         | chr7:150,642,044-150,675,402 | AX-90057683 |
| KCNH2 | ---         | chr7:150,642,044-150,675,402 | AX-90061401 |
| KCNH2 | ---         | chr7:150,642,044-150,675,402 | AX-90027273 |
| KCNH2 | rs121912516 | chr7:150,642,044-150,675,402 | AX-90042288 |
| KCNH2 | ---         | chr7:150,642,044-150,675,402 | AX-90079142 |
| KCNH2 | ---         | chr7:150,642,044-150,675,402 | AX-90046014 |
| KCNH2 | rs199472918 | chr7:150,642,044-150,675,402 | AX-86687248 |
| KCNH2 | ---         | chr7:150,642,044-150,675,402 | AX-90043947 |
| KCNH2 | rs375872367 | chr7:150,642,044-150,675,402 | AX-86633551 |
| KCNH2 | ---         | chr7:150,642,044-150,675,402 | AX-90036205 |
| KCNH2 | ---         | chr7:150,642,044-150,675,402 | AX-90031820 |
| KCNH2 | rs202102276 | chr7:150,642,044-150,675,402 | AX-82911540 |
| KCNH2 | ---         | chr7:150,642,044-150,675,402 | AX-90034168 |
| KCNH2 | ---         | chr7:150,642,044-150,675,402 | AX-90063071 |
| KCNH2 | ---         | chr7:150,642,044-150,675,402 | AX-90027511 |
| KCNH2 | rs2072411   | chr7:150,642,044-150,675,402 | AX-96971248 |
| KCNH2 | rs2072411   | chr7:150,642,044-150,675,402 | AX-96999353 |
| KCNH2 | rs35117381  | chr7:150,642,044-150,675,402 | AX-96986536 |



|       |             |                              |              |
|-------|-------------|------------------------------|--------------|
| KCNH2 | rs112283042 | chr7:150,642,044-150,675,402 | AX-97471321  |
| KCNH2 | ---         | chr7:150,642,044-150,675,402 | AX-90060121  |
| KCNH2 | rs1805120   | chr7:150,642,044-150,675,402 | AX-96880250  |
| KCNH2 | rs1805120   | chr7:150,642,044-150,675,402 | AX-96882384  |
| KCNH2 | ---         | chr7:150,642,044-150,675,402 | AX-90028673  |
| KCNH2 | ---         | chr7:150,642,044-150,675,402 | AX-90027940  |
| KCNH2 | ---         | chr7:150,642,044-150,675,402 | AX-90035258  |
| KCNH2 | ---         | chr7:150,642,044-150,675,402 | AX-90036651  |
| KCNH2 | ---         | chr7:150,642,044-150,675,402 | AX-90063654  |
| KCNH2 | ---         | chr7:150,642,044-150,675,402 | AX-90035821  |
| KCNH2 | ---         | chr7:150,642,044-150,675,402 | AX-86569549  |
| KCNH2 | ---         | chr7:150,642,044-150,675,402 | AX-90038075  |
| KCNH2 | ---         | chr7:150,642,044-150,675,402 | AX-90063472  |
| KCNH2 | ---         | chr7:150,642,044-150,675,402 | AX-36091011  |
| KCNH2 | ---         | chr7:150,642,044-150,675,402 | AX-90029751  |
| KCNH2 | ---         | chr7:150,642,044-150,675,402 | AX-90059832  |
| KCNH2 | ---         | chr7:150,642,044-150,675,402 | AX-90078241  |
| KCNH2 | ---         | chr7:150,642,044-150,675,402 | AX-90027988  |
| KCNH2 | ---         | chr7:150,642,044-150,675,402 | AX-90033609  |
| KCNH2 | ---         | chr7:150,642,044-150,675,402 | AX-90031614  |
| KCNH2 | ---         | chr7:150,642,044-150,675,402 | AX-90058188  |
| KCNH2 | ---         | chr7:150,642,044-150,675,402 | AX-90077738  |
| KCNH2 | ---         | chr7:150,642,044-150,675,402 | AX-90063655  |
| KCNH2 | ---         | chr7:150,642,044-150,675,402 | AX-90059576  |
| KCNH2 | ---         | chr7:150,642,044-150,675,402 | AX-90062312  |
| KCNH2 | ---         | chr7:150,642,044-150,675,402 | AX-90031094  |
| KCNH2 | ---         | chr7:150,642,044-150,675,402 | AX-90029985  |
| KCNH2 | ---         | chr7:150,642,044-150,675,402 | AX-90074611  |
| KCNH2 | ---         | chr7:150,642,044-150,675,402 | AX-90064939  |
| KCNH2 | ---         | chr7:150,642,044-150,675,402 | AX-90063944  |
| KCNH2 | ---         | chr7:150,642,044-150,675,402 | AX-90042865  |
| KCNH2 | ---         | chr7:150,642,044-150,675,402 | AX-86568064  |
| KCNH2 | ---         | chr7:150,642,044-150,675,402 | AX-90033762  |
| KCNH2 | ---         | chr7:150,642,044-150,675,402 | AX-90047511  |
| KCNH2 | ---         | chr7:150,642,044-150,675,402 | AX-90028037  |
| KCNH2 | ---         | chr7:150,642,044-150,675,402 | AX-90036375  |
| KCNH2 | ---         | chr7:150,642,044-150,675,402 | AX-90057557  |
| KCNH2 | ---         | chr7:150,642,044-150,675,402 | AX-90066127  |
| KCNH2 | ---         | chr7:150,642,044-150,675,402 | AX-90064004  |
| KCNH2 | ---         | chr7:150,642,044-150,675,402 | AX-90028281  |
| KCNH2 | ---         | chr7:150,642,044-150,675,402 | AX-90044037  |
| KCNH2 | ---         | chr7:150,642,044-150,675,402 | AX-90027445  |
| KCNH2 | ---         | chr7:150,642,044-150,675,402 | AX-90034523  |
| KCNH2 | ---         | chr7:150,642,044-150,675,402 | AX-90059076  |
| KCNH2 | ---         | chr7:150,642,044-150,675,402 | AX-90057184  |
| KCNH2 | ---         | chr7:150,642,044-150,675,402 | AX-90037283  |
| KCNH2 | ---         | chr7:150,642,044-150,675,402 | AX-90058263  |
| KCNH2 | ---         | chr7:150,642,044-150,675,402 | AX-90036795  |
| KCNH2 | ---         | chr7:150,642,044-150,675,402 | AX-90037346  |
| KCNH2 | ---         | chr7:150,642,044-150,675,402 | AX-90058468  |
| KCNH2 | ---         | chr7:150,642,044-150,675,402 | AX-90043586  |
| KCNH2 | ---         | chr7:150,642,044-150,675,402 | AX-90029877  |
| KCNH2 | rs2269000   | chr7:150,642,044-150,675,402 | AX-36091015  |
| KCNH2 | rs2968862   | chr7:150,642,044-150,675,402 | AX-112919530 |
| KCNH2 | rs2269001   | chr7:150,642,044-150,675,402 | AX-42143555  |

|       |             |                              |              |
|-------|-------------|------------------------------|--------------|
| KCNH2 | rs887586    | chr7:150,642,044-150,675,402 | AX-36091027  |
| KCNH2 | rs876088    | chr7:150,642,044-150,675,402 | AX-96924278  |
| KCNH2 | rs141096923 | chr7:150,642,044-150,675,402 | AX-96785711  |
| KCNH2 | rs141096923 | chr7:150,642,044-150,675,402 | AX-97448176  |
| KCNH2 | rs882156    | chr7:150,642,044-150,675,402 | AX-97389618  |
| KCNH2 | ---         | chr7:150,642,044-150,675,402 | AX-90064350  |
| KCNH2 | ---         | chr7:150,642,044-150,675,402 | AX-90036282  |
| KCNH2 | rs138776684 | chr7:150,642,044-150,675,402 | AX-83426361  |
| KCNH2 | ---         | chr7:150,642,044-150,675,402 | AX-90030777  |
| KCNH2 | ---         | chr7:150,642,044-150,675,402 | AX-90050167  |
| KCNH2 | ---         | chr7:150,642,044-150,675,402 | AX-90077043  |
| KCNH2 | ---         | chr7:150,642,044-150,675,402 | AX-90027632  |
| KCNH2 | ---         | chr7:150,642,044-150,675,402 | AX-90035380  |
| KCNH2 | ---         | chr7:150,642,044-150,675,402 | AX-90077438  |
| KCNH2 | rs199473505 | chr7:150,642,044-150,675,402 | AX-82969773  |
| KCNH2 | ---         | chr7:150,642,044-150,675,402 | AX-86553087  |
| KCNH2 | ---         | chr7:150,642,044-150,675,402 | AX-90057690  |
| KCNH2 | ---         | chr7:150,642,044-150,675,402 | AX-90062833  |
| KCNH2 | rs199472885 | chr7:150,642,044-150,675,402 | AX-90042353  |
| KCNH2 | ---         | chr7:150,642,044-150,675,402 | AX-90046840  |
| KCNH2 | ---         | chr7:150,642,044-150,675,402 | AX-90080799  |
| KCNH2 | rs4725385   | chr7:150,642,044-150,675,402 | AX-36091041  |
| KCNH2 | ---         | chr7:150,642,044-150,675,402 | AX-90058240  |
| KCNH2 | ---         | chr7:150,642,044-150,675,402 | AX-90079424  |
| KCNH2 | ---         | chr7:150,642,044-150,675,402 | AX-90064673  |
| KCNH2 | ---         | chr7:150,642,044-150,675,402 | AX-90028568  |
| KCNH2 | ---         | chr7:150,642,044-150,675,402 | AX-90027329  |
| KCNH2 | ---         | chr7:150,642,044-150,675,402 | AX-90035058  |
| KCNH2 | ---         | chr7:150,642,044-150,675,402 | AX-90030397  |
| KCNH2 | ---         | chr7:150,642,044-150,675,402 | AX-90060051  |
| KCNH2 | ---         | chr7:150,642,044-150,675,402 | AX-90063487  |
| KCNH2 | ---         | chr7:150,642,044-150,675,402 | AX-90063381  |
| KCNH2 | ---         | chr7:150,642,044-150,675,402 | AX-90029992  |
| KCNH2 | ---         | chr7:150,642,044-150,675,402 | AX-90034497  |
| KCNH2 | rs758890    | chr7:150,642,044-150,675,402 | AX-156282450 |
| KCNH2 | rs41307316  | chr7:150,642,044-150,675,402 | AX-36091053  |
| KCNH2 | ---         | chr7:150,642,044-150,675,402 | AX-90074642  |
| KCNH2 | ---         | chr7:150,642,044-150,675,402 | AX-90079871  |
| KCNH2 | rs139544114 | chr7:150,642,044-150,675,402 | AX-83308502  |
| KCNH2 | ---         | chr7:150,642,044-150,675,402 | AX-90051612  |
| KCNH2 | rs199472864 | chr7:150,642,044-150,675,402 | AX-86554923  |
| KCNH2 | ---         | chr7:150,642,044-150,675,402 | AX-90066121  |
| KCNH2 | ---         | chr7:150,642,044-150,675,402 | AX-90052225  |
| KCNH2 | ---         | chr7:150,642,044-150,675,402 | AX-90033975  |
| KCNH2 | ---         | chr7:150,642,044-150,675,402 | AX-90033138  |
| KCNH2 | rs150988911 | chr7:150,642,044-150,675,402 | AX-86726286  |
| KCNH2 | ---         | chr7:150,642,044-150,675,402 | AX-90033783  |
| KCNH2 | ---         | chr7:150,642,044-150,675,402 | AX-90048381  |
| KCNH2 | ---         | chr7:150,642,044-150,675,402 | AX-90031003  |
| KCNH2 | ---         | chr7:150,642,044-150,675,402 | AX-90063628  |
| KCNH2 | ---         | chr7:150,642,044-150,675,402 | AX-90031415  |
| KCNH2 | ---         | chr7:150,642,044-150,675,402 | AX-90036079  |
| KCNH2 | ---         | chr7:150,642,044-150,675,402 | AX-90036144  |
| KCNH2 | ---         | chr7:150,642,044-150,675,402 | AX-90060257  |
| KCNH2 | rs56282717  | chr7:150,642,044-150,675,402 | AX-36091055  |

|       |             |                              |              |
|-------|-------------|------------------------------|--------------|
| KCNH2 | rs12668582  | chr7:150,642,044-150,675,402 | AX-113961427 |
| KCNH2 | rs6947240   | chr7:150,642,044-150,675,402 | AX-113882354 |
| KCNH2 | rs6947240   | chr7:150,642,044-150,675,402 | AX-113956138 |
| KCNH2 | rs55851300  | chr7:150,642,044-150,675,402 | AX-151150024 |
| KCNH2 | rs55851300  | chr7:150,642,044-150,675,402 | AX-156297907 |
| KCNH2 | rs73167623  | chr7:150,642,044-150,675,402 | AX-113429276 |
| KCNH2 | rs73167623  | chr7:150,642,044-150,675,402 | AX-113985538 |
| KCNH2 | rs34657537  | chr7:150,642,044-150,675,402 | AX-36091061  |
| KCNH2 | rs3823587   | chr7:150,642,044-150,675,402 | AX-156276348 |
| KCNH2 | rs3823587   | chr7:150,642,044-150,675,402 | AX-156293264 |
| KCNH2 | rs3807377   | chr7:150,642,044-150,675,402 | AX-36091063  |
| KCNH2 | rs3807376   | chr7:150,642,044-150,675,402 | AX-96978614  |
| KCNH2 | rs3807376   | chr7:150,642,044-150,675,402 | AX-96993770  |
| KCNH2 | rs35760656  | chr7:150,642,044-150,675,402 | AX-156293265 |
| KCNH2 | rs3778874   | chr7:150,642,044-150,675,402 | AX-96970068  |
| KCNH2 | rs3778874   | chr7:150,642,044-150,675,402 | AX-97002447  |
| KCNH2 | rs4725386   | chr7:150,642,044-150,675,402 | AX-36091077  |
| KCNH2 | rs7789146   | chr7:150,642,044-150,675,402 | AX-36091089  |
| KCNH2 | rs7789585   | chr7:150,642,044-150,675,402 | AX-156276350 |
| KCNH2 | rs2907947   | chr7:150,642,044-150,675,402 | AX-36091097  |
| KCNH2 | rs11766022  | chr7:150,642,044-150,675,402 | AX-36091099  |
| KCNH2 | rs2968857   | chr7:150,642,044-150,675,402 | AX-42143565  |
| KCNH2 | ---         | chr7:150,642,044-150,675,402 | AX-96761932  |
| KCNH2 | ---         | chr7:150,642,044-150,675,402 | AX-96794302  |
| KCNH2 | rs201403582 | chr7:150,642,044-150,675,402 | AX-96872347  |
| KCNH2 | rs139397678 | chr7:150,642,044-150,675,402 | AX-96906308  |
| KCNH2 | rs139397678 | chr7:150,642,044-150,675,402 | AX-96925882  |
| KCNH2 | rs112948920 | chr7:150,642,044-150,675,402 | AX-151385995 |
| KCNH2 | rs112948920 | chr7:150,642,044-150,675,402 | AX-156286056 |
| KCNH2 | rs12540183  | chr7:150,642,044-150,675,402 | AX-112946285 |
| KCNH2 | rs13244889  | chr7:150,642,044-150,675,402 | AX-36091109  |
| KCNH2 | rs41308978  | chr7:150,642,044-150,675,402 | AX-36091115  |
| KCNH2 | rs3807375   | chr7:150,642,044-150,675,402 | AX-42143569  |
| KCNH2 | rs10236214  | chr7:150,642,044-150,675,402 | AX-96902416  |
| KCNH2 | rs11763131  | chr7:150,642,044-150,675,402 | AX-112993600 |
| KCNH2 | rs11763131  | chr7:150,642,044-150,675,402 | AX-113402324 |
| KCNH2 | rs3807374   | chr7:150,642,044-150,675,402 | AX-96911629  |
| KCNH2 | rs3807374   | chr7:150,642,044-150,675,402 | AX-96922612  |
| KCNH2 | rs4725984   | chr7:150,642,044-150,675,402 | AX-84652118  |
| KCNH2 | rs4725984   | chr7:150,642,044-150,675,402 | AX-95820782  |
| KCNH2 | rs3807373   | chr7:150,642,044-150,675,402 | AX-113407685 |
| KCNH2 | rs3807373   | chr7:150,642,044-150,675,402 | AX-113964184 |
| KCNH2 | rs3807372   | chr7:150,642,044-150,675,402 | AX-42143581  |
| KCNH2 | rs3778873   | chr7:150,642,044-150,675,402 | AX-42143583  |
| KCNH2 | rs3778872   | chr7:150,642,044-150,675,402 | AX-42143585  |
| KCNH2 | rs3778871   | chr7:150,642,044-150,675,402 | AX-36091143  |
| KCNH2 | rs3778870   | chr7:150,642,044-150,675,402 | AX-36091147  |
| KCNH2 | rs3778869   | chr7:150,642,044-150,675,402 | AX-36091149  |
| KCNH2 | rs3800779   | chr7:150,642,044-150,675,402 | AX-36091151  |
| KCNH2 | rs748693    | chr7:150,642,044-150,675,402 | AX-42143589  |
| KCNH2 | rs116065480 | chr7:150,642,044-150,675,402 | AX-38397259  |
| KCNH2 | ---         | chr7:150,642,044-150,675,402 | AX-90080885  |
| KCNH2 | ---         | chr7:150,642,044-150,675,402 | AX-90064213  |
| KCNH2 | ---         | chr7:150,642,044-150,675,402 | AX-90056673  |
| KCNH2 | ---         | chr7:150,642,044-150,675,402 | AX-90064164  |

|       |            |                              |              |
|-------|------------|------------------------------|--------------|
| KCNH2 | ---        | chr7:150,642,044-150,675,402 | AX-90029048  |
| KCNH2 | ---        | chr7:150,642,044-150,675,402 | AX-90059757  |
| KCNH2 | ---        | chr7:150,642,044-150,675,402 | AX-90031668  |
| KCNH2 | ---        | chr7:150,642,044-150,675,402 | AX-90029760  |
| KCNH2 | ---        | chr7:150,642,044-150,675,402 | AX-90027828  |
| KCNH2 | ---        | chr7:150,642,044-150,675,402 | AX-90073920  |
| KCNH2 | ---        | chr7:150,642,044-150,675,402 | AX-90059860  |
| KCNH2 | ---        | chr7:150,642,044-150,675,402 | AX-90057678  |
| KCNH2 | ---        | chr7:150,642,044-150,675,402 | AX-90066134  |
| KCNH2 | ---        | chr7:150,642,044-150,675,402 | AX-90057594  |
| KCNH2 | ---        | chr7:150,642,044-150,675,402 | AX-90066049  |
| KCNH2 | ---        | chr7:150,642,044-150,675,402 | AX-90060874  |
| KCNH2 | ---        | chr7:150,642,044-150,675,402 | AX-90062360  |
| KCNH2 | ---        | chr7:150,642,044-150,675,402 | AX-90060208  |
| KCNH2 | ---        | chr7:150,642,044-150,675,402 | AX-90032199  |
| KCNH2 | ---        | chr7:150,642,044-150,675,402 | AX-90064271  |
| KCNH2 | ---        | chr7:150,642,044-150,675,402 | AX-90059398  |
| KCNH2 | ---        | chr7:150,642,044-150,675,402 | AX-90059625  |
| KCNH2 | ---        | chr7:150,642,044-150,675,402 | AX-90028040  |
| KCNH2 | ---        | chr7:150,642,044-150,675,402 | AX-90034468  |
| KCNH2 | ---        | chr7:150,642,044-150,675,402 | AX-90058289  |
| KCNH2 | ---        | chr7:150,642,044-150,675,402 | AX-90031151  |
| KCNH2 | ---        | chr7:150,642,044-150,675,402 | AX-90028147  |
| KCNH2 | ---        | chr7:150,642,044-150,675,402 | AX-90029466  |
| KCNH2 | ---        | chr7:150,642,044-150,675,402 | AX-90036415  |
| KCNH2 | ---        | chr7:150,642,044-150,675,402 | AX-90027394  |
| KCNH2 | ---        | chr7:150,642,044-150,675,402 | AX-90029254  |
| KCNH2 | ---        | chr7:150,642,044-150,675,402 | AX-90058133  |
| KCNH2 | ---        | chr7:150,642,044-150,675,402 | AX-90064576  |
| KCNH2 | ---        | chr7:150,642,044-150,675,402 | AX-90027503  |
| KCNH2 | ---        | chr7:150,642,044-150,675,402 | AX-90059183  |
| KCNH2 | ---        | chr7:150,642,044-150,675,402 | AX-90062406  |
| KCNH2 | ---        | chr7:150,642,044-150,675,402 | AX-90036977  |
| KCNH2 | ---        | chr7:150,642,044-150,675,402 | AX-90031687  |
| KCNH2 | ---        | chr7:150,642,044-150,675,402 | AX-90056049  |
| KCNH2 | ---        | chr7:150,642,044-150,675,402 | AX-90066099  |
| KCNH2 | ---        | chr7:150,642,044-150,675,402 | AX-90064283  |
| KCNH2 | ---        | chr7:150,642,044-150,675,402 | AX-90027823  |
| KCNH2 | ---        | chr7:150,642,044-150,675,402 | AX-90061167  |
| KCNH2 | ---        | chr7:150,642,044-150,675,402 | AX-90034498  |
| KCNH2 | ---        | chr7:150,642,044-150,675,402 | AX-90035307  |
| KCNH2 | ---        | chr7:150,642,044-150,675,402 | AX-90034584  |
| KCNH2 | ---        | chr7:150,642,044-150,675,402 | AX-90034082  |
| KCNH2 | ---        | chr7:150,642,044-150,675,402 | AX-90031834  |
| KCNH2 | ---        | chr7:150,642,044-150,675,402 | AX-90036686  |
| KCNH2 | ---        | chr7:150,642,044-150,675,402 | AX-90034522  |
| KCNH2 | ---        | chr7:150,642,044-150,675,402 | AX-90031326  |
| KCNH2 | rs41309002 | chr7:150,642,044-150,675,402 | AX-36091159  |
| KCNH2 | rs3807370  | chr7:150,642,044-150,675,402 | AX-112998957 |
| KCNH2 | rs3807370  | chr7:150,642,044-150,675,402 | AX-113407687 |
| KCNH2 | rs1036145  | chr7:150,642,044-150,675,402 | AX-42143597  |
| KCNH2 | rs35277497 | chr7:150,642,044-150,675,402 | AX-96880943  |
| KCNH2 | ---        | chr7:150,642,044-150,675,402 | AX-90080698  |
| KCNH2 | ---        | chr7:150,642,044-150,675,402 | AX-90059502  |
| KCNH2 | ---        | chr7:150,642,044-150,675,402 | AX-90056168  |

|       |             |                               |             |
|-------|-------------|-------------------------------|-------------|
| KCNH2 | ---         | chr7:150,642,044-150,675,402  | AX-90027129 |
| KCNH2 | rs189034123 | chr7:150,642,044-150,675,402  | AX-88788298 |
| KCNJ2 | ---         | chr17:68,164,814-68,176,183   | AX-90062412 |
| KCNJ2 | ---         | chr17:68,164,814-68,176,183   | AX-90056836 |
| KCNJ2 | rs104894580 | chr17:68,164,814-68,176,183   | AX-88797417 |
| KCNJ2 | ---         | chr17:68,164,814-68,176,183   | AX-90055648 |
| KCNJ2 | ---         | chr17:68,164,814-68,176,183   | AX-90055649 |
| KCNJ2 | rs104894575 | chr17:68,164,814-68,176,183   | AX-88797415 |
| KCNJ2 | ---         | chr17:68,164,814-68,176,183   | AX-90055651 |
| KCNJ2 | ---         | chr17:68,164,814-68,176,183   | AX-90036629 |
| KCNJ2 | ---         | chr17:68,164,814-68,176,183   | AX-90026767 |
| KCNJ2 | ---         | chr17:68,164,814-68,176,183   | AX-90058621 |
| KCNJ2 | ---         | chr17:68,164,814-68,176,183   | AX-90055653 |
| KCNJ2 | ---         | chr17:68,164,814-68,176,183   | AX-90036385 |
| KCNJ2 | ---         | chr17:68,164,814-68,176,183   | AX-90026770 |
| KCNJ2 | rs147750704 | chr17:68,164,814-68,176,183   | AX-83234881 |
| KCNJ2 | ---         | chr17:68,164,814-68,176,183   | AX-90076023 |
| KCNJ2 | ---         | chr17:68,164,814-68,176,183   | AX-90057151 |
| KCNJ2 | ---         | chr17:68,164,814-68,176,183   | AX-90055656 |
| KCNJ2 | ---         | chr17:68,164,814-68,176,183   | AX-90055657 |
| KCNJ2 | ---         | chr17:68,164,814-68,176,183   | AX-90026773 |
| KCNJ2 | ---         | chr17:68,164,814-68,176,183   | AX-90026774 |
| KCNJ2 | ---         | chr17:68,164,814-68,176,183   | AX-90063584 |
| KCNJ2 | ---         | chr17:68,164,814-68,176,183   | AX-90026775 |
| KCNJ2 | ---         | chr17:68,164,814-68,176,183   | AX-90035762 |
| KCNJ2 | ---         | chr17:68,164,814-68,176,183   | AX-90055661 |
| KCNJ2 | ---         | chr17:68,164,814-68,176,183   | AX-90026777 |
| KCNJ2 | ---         | chr17:68,164,814-68,176,183   | AX-90051933 |
| KCNJ2 | rs104894584 | chr17:68,164,814-68,176,183   | AX-90070100 |
| KCNJ2 | rs104894581 | chr17:68,164,814-68,176,183   | AX-88754373 |
| KCNJ2 | ---         | chr17:68,164,814-68,176,183   | AX-90055663 |
| KCNJ2 | ---         | chr17:68,164,814-68,176,183   | AX-90026779 |
| KCNJ2 | ---         | chr17:68,164,814-68,176,183   | AX-90055665 |
| KCNJ2 | ---         | chr17:68,164,814-68,176,183   | AX-90055667 |
| KCNJ2 | rs104894578 | chr17:68,164,814-68,176,183   | AX-88754371 |
| KCNJ2 | ---         | chr17:68,164,814-68,176,183   | AX-90055668 |
| KCNJ2 | ---         | chr17:68,164,814-68,176,183   | AX-90063815 |
| KCNJ2 | ---         | chr17:68,164,814-68,176,183   | AX-90026784 |
| KCNJ2 | ---         | chr17:68,164,814-68,176,183   | AX-90026785 |
| KCNJ2 | ---         | chr17:68,164,814-68,176,183   | AX-90056816 |
| KCNJ2 | ---         | chr17:68,164,814-68,176,183   | AX-90033614 |
| KCNJ2 | rs104894582 | chr17:68,164,814-68,176,183   | AX-88754374 |
| KCNJ2 | ---         | chr17:68,164,814-68,176,183   | AX-90055671 |
| KCNJ2 | ---         | chr17:68,164,814-68,176,183   | AX-90026787 |
| KCNJ2 | ---         | chr17:68,164,814-68,176,183   | AX-90055673 |
| KCNJ2 | ---         | chr17:68,164,814-68,176,183   | AX-90055674 |
| KCNJ2 | ---         | chr17:68,164,814-68,176,183   | AX-90055675 |
| KCNJ2 | ---         | chr17:68,164,814-68,176,183   | AX-90042581 |
| KCNJ2 | ---         | chr17:68,164,814-68,176,183   | AX-90032889 |
| KCNJ2 | rs144022753 | chr17:68,164,814-68,176,183   | AX-86649114 |
| KCNJ2 | rs141069645 | chr17:68,164,814-68,176,183   | AX-83167392 |
| KCNJ5 | rs34444372  | chr11:128,761,313-128,787,951 | AX-16517489 |
| KCNJ5 | rs61910641  | chr11:128,761,313-128,787,951 | AX-29921921 |
| KCNJ5 | rs7924416   | chr11:128,761,313-128,787,951 | AX-11654077 |
| KCNJ5 | rs76097649  | chr11:128,761,313-128,787,951 | AX-16517491 |

|       |             |                               |              |
|-------|-------------|-------------------------------|--------------|
| KCNJ5 | rs2846674   | chr11:128,761,313-128,787,951 | AX-11417620  |
| KCNJ5 | rs2846700   | chr11:128,761,313-128,787,951 | AX-16517494  |
| KCNJ5 | rs76403033  | chr11:128,761,313-128,787,951 | AX-16517497  |
| KCNJ5 | rs78838391  | chr11:128,761,313-128,787,951 | AX-29921959  |
| KCNJ5 | rs4937389   | chr11:128,761,313-128,787,951 | AX-29921971  |
| KCNJ5 | rs138330651 | chr11:128,761,313-128,787,951 | AX-83413531  |
| KCNJ5 | rs78864180  | chr11:128,761,313-128,787,951 | AX-29922011  |
| KCNJ5 | rs4937390   | chr11:128,761,313-128,787,951 | AX-38991737  |
| KCNJ5 | rs11221510  | chr11:128,761,313-128,787,951 | AX-38991739  |
| KCNJ5 | rs6590357   | chr11:128,761,313-128,787,951 | AX-38991741  |
| KCNJ5 | ---         | chr11:128,761,313-128,787,951 | AX-90031902  |
| KCNJ5 | ---         | chr11:128,761,313-128,787,951 | AX-90058864  |
| KCNJ5 | ---         | chr11:128,761,313-128,787,951 | AX-90060975  |
| KCNJ5 | rs7118824   | chr11:128,761,313-128,787,951 | AX-38991743  |
| KCNJ5 | rs1940455   | chr11:128,761,313-128,787,951 | AX-38991757  |
| KCNQ1 | ---         | chr11:2,466,221-2,870,340     | AX-90065706  |
| KCNQ1 | rs397508108 | chr11:2,466,221-2,870,340     | AX-90074515  |
| KCNQ1 | ---         | chr11:2,466,221-2,870,340     | AX-90034009  |
| KCNQ1 | ---         | chr11:2,466,221-2,870,340     | AX-90036019  |
| KCNQ1 | ---         | chr11:2,466,221-2,870,340     | AX-90060580  |
| KCNQ1 | rs120074191 | chr11:2,466,221-2,870,340     | AX-90069286  |
| KCNQ1 | ---         | chr11:2,466,221-2,870,340     | AX-90077327  |
| KCNQ1 | ---         | chr11:2,466,221-2,870,340     | AX-90059309  |
| KCNQ1 | ---         | chr11:2,466,221-2,870,340     | AX-90056544  |
| KCNQ1 | rs112134401 | chr11:2,466,221-2,870,340     | AX-96804368  |
| KCNQ1 | rs112134401 | chr11:2,466,221-2,870,340     | AX-96823840  |
| KCNQ1 | rs78615661  | chr11:2,466,221-2,870,340     | AX-96877969  |
| KCNQ1 | rs78615661  | chr11:2,466,221-2,870,340     | AX-97351222  |
| KCNQ1 | rs76429041  | chr11:2,466,221-2,870,340     | AX-96924470  |
| KCNQ1 | rs76429041  | chr11:2,466,221-2,870,340     | AX-97469116  |
| KCNQ1 | rs12287029  | chr11:2,466,221-2,870,340     | AX-96561648  |
| KCNQ1 | rs12287029  | chr11:2,466,221-2,870,340     | AX-96645217  |
| KCNQ1 | rs12288463  | chr11:2,466,221-2,870,340     | AX-30006657  |
| KCNQ1 | rs111289280 | chr11:2,466,221-2,870,340     | AX-30006659  |
| KCNQ1 | rs7110663   | chr11:2,466,221-2,870,340     | AX-30006681  |
| KCNQ1 | rs7932717   | chr11:2,466,221-2,870,340     | AX-30006687  |
| KCNQ1 | rs2023818   | chr11:2,466,221-2,870,340     | AX-30006697  |
| KCNQ1 | rs11827153  | chr11:2,466,221-2,870,340     | AX-113403079 |
| KCNQ1 | rs74048614  | chr11:2,466,221-2,870,340     | AX-30006719  |
| KCNQ1 | rs11824286  | chr11:2,466,221-2,870,340     | AX-30006723  |
| KCNQ1 | rs7115494   | chr11:2,466,221-2,870,340     | AX-113963125 |
| KCNQ1 | rs67832597  | chr11:2,466,221-2,870,340     | AX-96783349  |
| KCNQ1 | ---         | chr11:2,466,221-2,870,340     | AX-30006747  |
| KCNQ1 | rs112292464 | chr11:2,466,221-2,870,340     | AX-96783350  |
| KCNQ1 | rs112292464 | chr11:2,466,221-2,870,340     | AX-97421361  |
| KCNQ1 | rs34273392  | chr11:2,466,221-2,870,340     | AX-30006753  |
| KCNQ1 | rs67751613  | chr11:2,466,221-2,870,340     | AX-96881783  |
| KCNQ1 | rs67751613  | chr11:2,466,221-2,870,340     | AX-96883934  |
| KCNQ1 | rs800336    | chr11:2,466,221-2,870,340     | AX-39035879  |
| KCNQ1 | rs800337    | chr11:2,466,221-2,870,340     | AX-30006777  |
| KCNQ1 | rs800338    | chr11:2,466,221-2,870,340     | AX-30006781  |
| KCNQ1 | rs202212291 | chr11:2,466,221-2,870,340     | AX-156285290 |
| KCNQ1 | rs202212291 | chr11:2,466,221-2,870,340     | AX-96645310  |
| KCNQ1 | rs7945198   | chr11:2,466,221-2,870,340     | AX-30006795  |
| KCNQ1 | rs739677    | chr11:2,466,221-2,870,340     | AX-39035889  |

|       |             |                           |              |
|-------|-------------|---------------------------|--------------|
| KCNQ1 | rs2005693   | chr11:2,466,221-2,870,340 | AX-96084843  |
| KCNQ1 | rs2005693   | chr11:2,466,221-2,870,340 | AX-97352594  |
| KCNQ1 | rs201426302 | chr11:2,466,221-2,870,340 | AX-96644022  |
| KCNQ1 | rs5789256   | chr11:2,466,221-2,870,340 | AX-151160962 |
| KCNQ1 | rs5789256   | chr11:2,466,221-2,870,340 | AX-96933794  |
| KCNQ1 | rs74048621  | chr11:2,466,221-2,870,340 | AX-30006817  |
| KCNQ1 | rs12274567  | chr11:2,466,221-2,870,340 | AX-39035895  |
| KCNQ1 | rs1811815   | chr11:2,466,221-2,870,340 | AX-39035897  |
| KCNQ1 | rs926189    | chr11:2,466,221-2,870,340 | AX-112920257 |
| KCNQ1 | rs926189    | chr11:2,466,221-2,870,340 | AX-113959667 |
| KCNQ1 | rs34780268  | chr11:2,466,221-2,870,340 | AX-88736678  |
| KCNQ1 | rs34780268  | chr11:2,466,221-2,870,340 | AX-96768801  |
| KCNQ1 | rs10832090  | chr11:2,466,221-2,870,340 | AX-96561643  |
| KCNQ1 | rs112948720 | chr11:2,466,221-2,870,340 | AX-96560456  |
| KCNQ1 | rs112948720 | chr11:2,466,221-2,870,340 | AX-96644025  |
| KCNQ1 | rs59954955  | chr11:2,466,221-2,870,340 | AX-96563261  |
| KCNQ1 | rs59954955  | chr11:2,466,221-2,870,340 | AX-96646830  |
| KCNQ1 | rs56714380  | chr11:2,466,221-2,870,340 | AX-96560123  |
| KCNQ1 | rs56714380  | chr11:2,466,221-2,870,340 | AX-96643692  |
| KCNQ1 | rs10741622  | chr11:2,466,221-2,870,340 | AX-96563948  |
| KCNQ1 | rs10741622  | chr11:2,466,221-2,870,340 | AX-96647517  |
| KCNQ1 | rs57209697  | chr11:2,466,221-2,870,340 | AX-96565417  |
| KCNQ1 | rs57209697  | chr11:2,466,221-2,870,340 | AX-96648986  |
| KCNQ1 | rs58807875  | chr11:2,466,221-2,870,340 | AX-122166023 |
| KCNQ1 | rs7129506   | chr11:2,466,221-2,870,340 | AX-96564849  |
| KCNQ1 | rs34565276  | chr11:2,466,221-2,870,340 | AX-13016117  |
| KCNQ1 | rs60404945  | chr11:2,466,221-2,870,340 | AX-96645438  |
| KCNQ1 | rs56403874  | chr11:2,466,221-2,870,340 | AX-156279806 |
| KCNQ1 | rs12271931  | chr11:2,466,221-2,870,340 | AX-96561786  |
| KCNQ1 | rs12271931  | chr11:2,466,221-2,870,340 | AX-96645355  |
| KCNQ1 | rs73417589  | chr11:2,466,221-2,870,340 | AX-96959054  |
| KCNQ1 | rs73417589  | chr11:2,466,221-2,870,340 | AX-97269031  |
| KCNQ1 | rs76760338  | chr11:2,466,221-2,870,340 | AX-156270457 |
| KCNQ1 | rs76760338  | chr11:2,466,221-2,870,340 | AX-156289275 |
| KCNQ1 | rs78937903  | chr11:2,466,221-2,870,340 | AX-30006985  |
| KCNQ1 | rs11022922  | chr11:2,466,221-2,870,340 | AX-39035985  |
| KCNQ1 | rs74048626  | chr11:2,466,221-2,870,340 | AX-96961092  |
| KCNQ1 | rs74048626  | chr11:2,466,221-2,870,340 | AX-97433721  |
| KCNQ1 | rs73417596  | chr11:2,466,221-2,870,340 | AX-30007049  |
| KCNQ1 | rs7948689   | chr11:2,466,221-2,870,340 | AX-96870306  |
| KCNQ1 | rs7948689   | chr11:2,466,221-2,870,340 | AX-96893885  |
| KCNQ1 | rs7948693   | chr11:2,466,221-2,870,340 | AX-96809907  |
| KCNQ1 | rs7951832   | chr11:2,466,221-2,870,340 | AX-39036007  |
| KCNQ1 | rs12574110  | chr11:2,466,221-2,870,340 | AX-96836571  |
| KCNQ1 | rs12574110  | chr11:2,466,221-2,870,340 | AX-96860032  |
| KCNQ1 | rs16928285  | chr11:2,466,221-2,870,340 | AX-39036019  |
| KCNQ1 | rs78427034  | chr11:2,466,221-2,870,340 | AX-30007133  |
| KCNQ1 | rs3864884   | chr11:2,466,221-2,870,340 | AX-39036027  |
| KCNQ1 | rs112600033 | chr11:2,466,221-2,870,340 | AX-30007201  |
| KCNQ1 | rs2075873   | chr11:2,466,221-2,870,340 | AX-39036049  |
| KCNQ1 | rs2074238   | chr11:2,466,221-2,870,340 | AX-83391590  |
| KCNQ1 | rs2074239   | chr11:2,466,221-2,870,340 | AX-39036087  |
| KCNQ1 | rs7939542   | chr11:2,466,221-2,870,340 | AX-39036091  |
| KCNQ1 | rs76503999  | chr11:2,466,221-2,870,340 | AX-96993607  |
| KCNQ1 | rs76503999  | chr11:2,466,221-2,870,340 | AX-97303415  |

|       |             |                           |              |
|-------|-------------|---------------------------|--------------|
| KCNQ1 | rs16928297  | chr11:2,466,221-2,870,340 | AX-39036107  |
| KCNQ1 | rs112344603 | chr11:2,466,221-2,870,340 | AX-37510487  |
| KCNQ1 | rs113127436 | chr11:2,466,221-2,870,340 | AX-156265987 |
| KCNQ1 | rs113127436 | chr11:2,466,221-2,870,340 | AX-156286649 |
| KCNQ1 | rs12280952  | chr11:2,466,221-2,870,340 | AX-30007443  |
| KCNQ1 | rs12296050  | chr11:2,466,221-2,870,340 | AX-16566350  |
| KCNQ1 | rs74771060  | chr11:2,466,221-2,870,340 | AX-16566375  |
| KCNQ1 | rs58560659  | chr11:2,466,221-2,870,340 | AX-96791297  |
| KCNQ1 | rs58560659  | chr11:2,466,221-2,870,340 | AX-97348523  |
| KCNQ1 | rs58558735  | chr11:2,466,221-2,870,340 | AX-30007585  |
| KCNQ1 | rs11821100  | chr11:2,466,221-2,870,340 | AX-30007597  |
| KCNQ1 | rs58770749  | chr11:2,466,221-2,870,340 | AX-16566424  |
| KCNQ1 | rs60807509  | chr11:2,466,221-2,870,340 | AX-30007609  |
| KCNQ1 | rs61873498  | chr11:2,466,221-2,870,340 | AX-30007611  |
| KCNQ1 | rs56075656  | chr11:2,466,221-2,870,340 | AX-16566435  |
| KCNQ1 | rs111903332 | chr11:2,466,221-2,870,340 | AX-30007653  |
| KCNQ1 | rs11604259  | chr11:2,466,221-2,870,340 | AX-96938042  |
| KCNQ1 | rs11604259  | chr11:2,466,221-2,870,340 | AX-97429368  |
| KCNQ1 | rs11601717  | chr11:2,466,221-2,870,340 | AX-96984168  |
| KCNQ1 | rs11601717  | chr11:2,466,221-2,870,340 | AX-96986293  |
| KCNQ1 | rs11604319  | chr11:2,466,221-2,870,340 | AX-96981965  |
| KCNQ1 | rs28649383  | chr11:2,466,221-2,870,340 | AX-97339893  |
| KCNQ1 | rs28724284  | chr11:2,466,221-2,870,340 | AX-120741853 |
| KCNQ1 | rs28724284  | chr11:2,466,221-2,870,340 | AX-122991447 |
| KCNQ1 | rs36093649  | chr11:2,466,221-2,870,340 | AX-96875880  |
| KCNQ1 | rs36093649  | chr11:2,466,221-2,870,340 | AX-96886628  |
| KCNQ1 | rs60009089  | chr11:2,466,221-2,870,340 | AX-96745768  |
| KCNQ1 | rs58680149  | chr11:2,466,221-2,870,340 | AX-144899885 |
| KCNQ1 | rs59809566  | chr11:2,466,221-2,870,340 | AX-156286650 |
| KCNQ1 | rs76534570  | chr11:2,466,221-2,870,340 | AX-16566497  |
| KCNQ1 | rs34657034  | chr11:2,466,221-2,870,340 | AX-156284400 |
| KCNQ1 | rs11604486  | chr11:2,466,221-2,870,340 | AX-112923818 |
| KCNQ1 | ---         | chr11:2,466,221-2,870,340 | AX-113964885 |
| KCNQ1 | rs11604980  | chr11:2,466,221-2,870,340 | AX-30007737  |
| KCNQ1 | rs7122546   | chr11:2,466,221-2,870,340 | AX-112925549 |
| KCNQ1 | rs7122546   | chr11:2,466,221-2,870,340 | AX-113964886 |
| KCNQ1 | rs7122557   | chr11:2,466,221-2,870,340 | AX-112999612 |
| KCNQ1 | rs7122557   | chr11:2,466,221-2,870,340 | AX-113408371 |
| KCNQ1 | rs7119581   | chr11:2,466,221-2,870,340 | AX-30007757  |
| KCNQ1 | rs7103046   | chr11:2,466,221-2,870,340 | AX-113408372 |
| KCNQ1 | rs7126330   | chr11:2,466,221-2,870,340 | AX-113408373 |
| KCNQ1 | rs7126330   | chr11:2,466,221-2,870,340 | AX-113964888 |
| KCNQ1 | rs16928325  | chr11:2,466,221-2,870,340 | AX-39036295  |
| KCNQ1 | rs3815063   | chr11:2,466,221-2,870,340 | AX-16566550  |
| KCNQ1 | rs3815064   | chr11:2,466,221-2,870,340 | AX-113408374 |
| KCNQ1 | rs3815064   | chr11:2,466,221-2,870,340 | AX-113482214 |
| KCNQ1 | rs5028646   | chr11:2,466,221-2,870,340 | AX-39036325  |
| KCNQ1 | rs75293264  | chr11:2,466,221-2,870,340 | AX-16566571  |
| KCNQ1 | rs16928333  | chr11:2,466,221-2,870,340 | AX-39036357  |
| KCNQ1 | rs2015013   | chr11:2,466,221-2,870,340 | AX-96971342  |
| KCNQ1 | rs2015013   | chr11:2,466,221-2,870,340 | AX-96999434  |
| KCNQ1 | rs718579    | chr11:2,466,221-2,870,340 | AX-113889345 |
| KCNQ1 | rs35869609  | chr11:2,466,221-2,870,340 | AX-96830761  |
| KCNQ1 | rs200616757 | chr11:2,466,221-2,870,340 | AX-96562889  |
| KCNQ1 | rs200616757 | chr11:2,466,221-2,870,340 | AX-96646458  |



|       |             |                           |              |
|-------|-------------|---------------------------|--------------|
| KCNQ1 | rs10832126  | chr11:2,466,221-2,870,340 | AX-112999619 |
| KCNQ1 | rs10832126  | chr11:2,466,221-2,870,340 | AX-113891028 |
| KCNQ1 | ---         | chr11:2,466,221-2,870,340 | AX-16566625  |
| KCNQ1 | rs2079046   | chr11:2,466,221-2,870,340 | AX-16566646  |
| KCNQ1 | rs12576156  | chr11:2,466,221-2,870,340 | AX-39036393  |
| KCNQ1 | rs757092    | chr11:2,466,221-2,870,340 | AX-39036399  |
| KCNQ1 | rs12288422  | chr11:2,466,221-2,870,340 | AX-96880016  |
| KCNQ1 | rs60502601  | chr11:2,466,221-2,870,340 | AX-96987783  |
| KCNQ1 | rs60502601  | chr11:2,466,221-2,870,340 | AX-97367066  |
| KCNQ1 | rs34847331  | chr11:2,466,221-2,870,340 | AX-148131020 |
| KCNQ1 | rs34847331  | chr11:2,466,221-2,870,340 | AX-156265989 |
| KCNQ1 | rs150893539 | chr11:2,466,221-2,870,340 | AX-156285106 |
| KCNQ1 | rs10832131  | chr11:2,466,221-2,870,340 | AX-112925552 |
| KCNQ1 | rs10832131  | chr11:2,466,221-2,870,340 | AX-112999620 |
| KCNQ1 | rs5789257   | chr11:2,466,221-2,870,340 | AX-11547311  |
| KCNQ1 | rs12576239  | chr11:2,466,221-2,870,340 | AX-16566753  |
| KCNQ1 | rs11022996  | chr11:2,466,221-2,870,340 | AX-16566754  |
| KCNQ1 | rs10832134  | chr11:2,466,221-2,870,340 | AX-11125418  |
| KCNQ1 | rs11022998  | chr11:2,466,221-2,870,340 | AX-16566769  |
| KCNQ1 | rs56403720  | chr11:2,466,221-2,870,340 | AX-16566822  |
| KCNQ1 | rs144866270 | chr11:2,466,221-2,870,340 | AX-16566837  |
| KCNQ1 | rs144866270 | chr11:2,466,221-2,870,340 | AX-96743565  |
| KCNQ1 | rs12801583  | chr11:2,466,221-2,870,340 | AX-30008219  |
| KCNQ1 | rs4337018   | chr11:2,466,221-2,870,340 | AX-156265991 |
| KCNQ1 | rs4578370   | chr11:2,466,221-2,870,340 | AX-11512289  |
| KCNQ1 | rs73419519  | chr11:2,466,221-2,870,340 | AX-30008277  |
| KCNQ1 | rs113255961 | chr11:2,466,221-2,870,340 | AX-30008281  |
| KCNQ1 | rs7106063   | chr11:2,466,221-2,870,340 | AX-30008291  |
| KCNQ1 | rs7105460   | chr11:2,466,221-2,870,340 | AX-123022895 |
| KCNQ1 | rs7105460   | chr11:2,466,221-2,870,340 | AX-123022896 |
| KCNQ1 | rs2188956   | chr11:2,466,221-2,870,340 | AX-30008323  |
| KCNQ1 | rs7947797   | chr11:2,466,221-2,870,340 | AX-96909616  |
| KCNQ1 | rs7947797   | chr11:2,466,221-2,870,340 | AX-96924889  |
| KCNQ1 | rs75421421  | chr11:2,466,221-2,870,340 | AX-97255812  |
| KCNQ1 | rs75082082  | chr11:2,466,221-2,870,340 | AX-156295395 |
| KCNQ1 | rs35955303  | chr11:2,466,221-2,870,340 | AX-120696694 |
| KCNQ1 | rs35955303  | chr11:2,466,221-2,870,340 | AX-156295396 |
| KCNQ1 | rs7125401   | chr11:2,466,221-2,870,340 | AX-30008367  |
| KCNQ1 | ---         | chr11:2,466,221-2,870,340 | AX-97418171  |
| KCNQ1 | ---         | chr11:2,466,221-2,870,340 | AX-96560894  |
| KCNQ1 | ---         | chr11:2,466,221-2,870,340 | AX-96644463  |
| KCNQ1 | rs2079043   | chr11:2,466,221-2,870,340 | AX-30008427  |
| KCNQ1 | ---         | chr11:2,466,221-2,870,340 | AX-30008431  |
| KCNQ1 | rs4929989   | chr11:2,466,221-2,870,340 | AX-113480493 |
| KCNQ1 | rs1080015   | chr11:2,466,221-2,870,340 | AX-39036601  |
| KCNQ1 | rs1080016   | chr11:2,466,221-2,870,340 | AX-156286651 |
| KCNQ1 | rs1080017   | chr11:2,466,221-2,870,340 | AX-156265993 |
| KCNQ1 | rs1080017   | chr11:2,466,221-2,870,340 | AX-156286652 |
| KCNQ1 | rs112638737 | chr11:2,466,221-2,870,340 | AX-156283666 |
| KCNQ1 | rs112638737 | chr11:2,466,221-2,870,340 | AX-96770973  |
| KCNQ1 | rs11023040  | chr11:2,466,221-2,870,340 | AX-96646679  |
| KCNQ1 | rs7928116   | chr11:2,466,221-2,870,340 | AX-156279809 |
| KCNQ1 | rs7928116   | chr11:2,466,221-2,870,340 | AX-156295398 |
| KCNQ1 | rs179392    | chr11:2,466,221-2,870,340 | AX-113912022 |
| KCNQ1 | rs179393    | chr11:2,466,221-2,870,340 | AX-30008523  |

|       |             |                           |              |
|-------|-------------|---------------------------|--------------|
| KCNQ1 | rs179394    | chr11:2,466,221-2,870,340 | AX-30008529  |
| KCNQ1 | rs4930114   | chr11:2,466,221-2,870,340 | AX-113503520 |
| KCNQ1 | rs4930114   | chr11:2,466,221-2,870,340 | AX-113912020 |
| KCNQ1 | rs179395    | chr11:2,466,221-2,870,340 | AX-151214667 |
| KCNQ1 | rs179395    | chr11:2,466,221-2,870,340 | AX-156283667 |
| KCNQ1 | rs179396    | chr11:2,466,221-2,870,340 | AX-113020755 |
| KCNQ1 | rs179396    | chr11:2,466,221-2,870,340 | AX-113912023 |
| KCNQ1 | rs2741959   | chr11:2,466,221-2,870,340 | AX-96943595  |
| KCNQ1 | rs2741959   | chr11:2,466,221-2,870,340 | AX-97481385  |
| KCNQ1 | rs2741960   | chr11:2,466,221-2,870,340 | AX-96867162  |
| KCNQ1 | rs2741960   | chr11:2,466,221-2,870,340 | AX-96895127  |
| KCNQ1 | rs12574553  | chr11:2,466,221-2,870,340 | AX-96876997  |
| KCNQ1 | rs144201211 | chr11:2,466,221-2,870,340 | AX-96561246  |
| KCNQ1 | rs7119560   | chr11:2,466,221-2,870,340 | AX-97316671  |
| KCNQ1 | rs7119560   | chr11:2,466,221-2,870,340 | AX-97430535  |
| KCNQ1 | rs7119686   | chr11:2,466,221-2,870,340 | AX-112994385 |
| KCNQ1 | rs179401    | chr11:2,466,221-2,870,340 | AX-148353620 |
| KCNQ1 | rs179401    | chr11:2,466,221-2,870,340 | AX-156279810 |
| KCNQ1 | rs7926983   | chr11:2,466,221-2,870,340 | AX-156279811 |
| KCNQ1 | rs7926983   | chr11:2,466,221-2,870,340 | AX-156295399 |
| KCNQ1 | rs7945539   | chr11:2,466,221-2,870,340 | AX-156279812 |
| KCNQ1 | rs7945539   | chr11:2,466,221-2,870,340 | AX-156295400 |
| KCNQ1 | rs2188199   | chr11:2,466,221-2,870,340 | AX-96803925  |
| KCNQ1 | rs2188199   | chr11:2,466,221-2,870,340 | AX-96823409  |
| KCNQ1 | rs2188200   | chr11:2,466,221-2,870,340 | AX-156295401 |
| KCNQ1 | rs2188202   | chr11:2,466,221-2,870,340 | AX-156279814 |
| KCNQ1 | rs2188202   | chr11:2,466,221-2,870,340 | AX-156295402 |
| KCNQ1 | rs76995564  | chr11:2,466,221-2,870,340 | AX-156279815 |
| KCNQ1 | rs76995564  | chr11:2,466,221-2,870,340 | AX-156295403 |
| KCNQ1 | rs10766136  | chr11:2,466,221-2,870,340 | AX-113403080 |
| KCNQ1 | rs10766136  | chr11:2,466,221-2,870,340 | AX-113476972 |
| KCNQ1 | rs114847525 | chr11:2,466,221-2,870,340 | AX-96834328  |
| KCNQ1 | rs114847525 | chr11:2,466,221-2,870,340 | AX-96861913  |
| KCNQ1 | rs7120338   | chr11:2,466,221-2,870,340 | AX-96767859  |
| KCNQ1 | rs7120338   | chr11:2,466,221-2,870,340 | AX-96791565  |
| KCNQ1 | rs7106498   | chr11:2,466,221-2,870,340 | AX-112946496 |
| KCNQ1 | rs10832175  | chr11:2,466,221-2,870,340 | AX-96886863  |
| KCNQ1 | rs10832175  | chr11:2,466,221-2,870,340 | AX-97348032  |
| KCNQ1 | rs10832179  | chr11:2,466,221-2,870,340 | AX-113020757 |
| KCNQ1 | rs10832179  | chr11:2,466,221-2,870,340 | AX-113912024 |
| KCNQ1 | rs1116249   | chr11:2,466,221-2,870,340 | AX-97287019  |
| KCNQ1 | rs1116249   | chr11:2,466,221-2,870,340 | AX-97400153  |
| KCNQ1 | rs11517737  | chr11:2,466,221-2,870,340 | AX-96790058  |
| KCNQ1 | rs11517737  | chr11:2,466,221-2,870,340 | AX-97308597  |
| KCNQ1 | rs11511852  | chr11:2,466,221-2,870,340 | AX-13539000  |
| KCNQ1 | rs11511852  | chr11:2,466,221-2,870,340 | AX-96808340  |
| KCNQ1 | rs148324871 | chr11:2,466,221-2,870,340 | AX-96829427  |
| KCNQ1 | rs35474939  | chr11:2,466,221-2,870,340 | AX-96726965  |
| KCNQ1 | rs75753584  | chr11:2,466,221-2,870,340 | AX-148895673 |
| KCNQ1 | rs75753584  | chr11:2,466,221-2,870,340 | AX-156270458 |
| KCNQ1 | rs179405    | chr11:2,466,221-2,870,340 | AX-96869364  |
| KCNQ1 | rs179405    | chr11:2,466,221-2,870,340 | AX-97307842  |
| KCNQ1 | rs7111657   | chr11:2,466,221-2,870,340 | AX-96857678  |
| KCNQ1 | rs73419534  | chr11:2,466,221-2,870,340 | AX-96889198  |
| KCNQ1 | rs73419534  | chr11:2,466,221-2,870,340 | AX-97471987  |

|       |             |                           |              |
|-------|-------------|---------------------------|--------------|
| KCNQ1 | rs2157761   | chr11:2,466,221-2,870,340 | AX-30009057  |
| KCNQ1 | rs179406    | chr11:2,466,221-2,870,340 | AX-11344292  |
| KCNQ1 | rs2106844   | chr11:2,466,221-2,870,340 | AX-96561253  |
| KCNQ1 | rs59732535  | chr11:2,466,221-2,870,340 | AX-16567497  |
| KCNQ1 | rs4930117   | chr11:2,466,221-2,870,340 | AX-96565331  |
| KCNQ1 | rs4930117   | chr11:2,466,221-2,870,340 | AX-96648900  |
| KCNQ1 | rs179407    | chr11:2,466,221-2,870,340 | AX-11344294  |
| KCNQ1 | rs2106203   | chr11:2,466,221-2,870,340 | AX-30009111  |
| KCNQ1 | rs2106204   | chr11:2,466,221-2,870,340 | AX-96937092  |
| KCNQ1 | rs2106204   | chr11:2,466,221-2,870,340 | AX-96964788  |
| KCNQ1 | rs56103600  | chr11:2,466,221-2,870,340 | AX-16567507  |
| KCNQ1 | rs61026321  | chr11:2,466,221-2,870,340 | AX-16567508  |
| KCNQ1 | rs179409    | chr11:2,466,221-2,870,340 | AX-16567525  |
| KCNQ1 | rs11023094  | chr11:2,466,221-2,870,340 | AX-11138560  |
| KCNQ1 | rs35574774  | chr11:2,466,221-2,870,340 | AX-30009163  |
| KCNQ1 | rs11023096  | chr11:2,466,221-2,870,340 | AX-11138561  |
| KCNQ1 | rs4929992   | chr11:2,466,221-2,870,340 | AX-39037009  |
| KCNQ1 | rs3819506   | chr11:2,466,221-2,870,340 | AX-12562743  |
| KCNQ1 | rs3819508   | chr11:2,466,221-2,870,340 | AX-30009201  |
| KCNQ1 | rs3819509   | chr11:2,466,221-2,870,340 | AX-30009203  |
| KCNQ1 | rs12283619  | chr11:2,466,221-2,870,340 | AX-96840815  |
| KCNQ1 | rs12283619  | chr11:2,466,221-2,870,340 | AX-97413645  |
| KCNQ1 | rs3819510   | chr11:2,466,221-2,870,340 | AX-96968331  |
| KCNQ1 | rs3819510   | chr11:2,466,221-2,870,340 | AX-97000703  |
| KCNQ1 | rs3819511   | chr11:2,466,221-2,870,340 | AX-11483174  |
| KCNQ1 | rs3819512   | chr11:2,466,221-2,870,340 | AX-96947906  |
| KCNQ1 | rs3819512   | chr11:2,466,221-2,870,340 | AX-96954211  |
| KCNQ1 | rs3819513   | chr11:2,466,221-2,870,340 | AX-96815978  |
| KCNQ1 | rs3819513   | chr11:2,466,221-2,870,340 | AX-97475286  |
| KCNQ1 | rs2237864   | chr11:2,466,221-2,870,340 | AX-30009287  |
| KCNQ1 | rs2237865   | chr11:2,466,221-2,870,340 | AX-96877657  |
| KCNQ1 | rs2237865   | chr11:2,466,221-2,870,340 | AX-97447677  |
| KCNQ1 | rs2237866   | chr11:2,466,221-2,870,340 | AX-12522212  |
| KCNQ1 | rs2012618   | chr11:2,466,221-2,870,340 | AX-11359847  |
| KCNQ1 | rs200596173 | chr11:2,466,221-2,870,340 | AX-97432800  |
| KCNQ1 | rs2097618   | chr11:2,466,221-2,870,340 | AX-96813449  |
| KCNQ1 | rs2097618   | chr11:2,466,221-2,870,340 | AX-96815565  |
| KCNQ1 | rs2012360   | chr11:2,466,221-2,870,340 | AX-96968561  |
| KCNQ1 | ---         | chr11:2,466,221-2,870,340 | AX-16567677  |
| KCNQ1 | rs7952222   | chr11:2,466,221-2,870,340 | AX-112920259 |
| KCNQ1 | rs7952222   | chr11:2,466,221-2,870,340 | AX-113476973 |
| KCNQ1 | rs80056995  | chr11:2,466,221-2,870,340 | AX-30009419  |
| KCNQ1 | rs16928363  | chr11:2,466,221-2,870,340 | AX-11290497  |
| KCNQ1 | rs909413    | chr11:2,466,221-2,870,340 | AX-112920260 |
| KCNQ1 | rs874185    | chr11:2,466,221-2,870,340 | AX-97279673  |
| KCNQ1 | rs2011766   | chr11:2,466,221-2,870,340 | AX-39037081  |
| KCNQ1 | rs73419557  | chr11:2,466,221-2,870,340 | AX-30009459  |
| KCNQ1 | rs2011750   | chr11:2,466,221-2,870,340 | AX-39037083  |
| KCNQ1 | rs7924915   | chr11:2,466,221-2,870,340 | AX-113476975 |
| KCNQ1 | rs7924915   | chr11:2,466,221-2,870,340 | AX-113885780 |
| KCNQ1 | rs2237867   | chr11:2,466,221-2,870,340 | AX-30009533  |
| KCNQ1 | rs2237868   | chr11:2,466,221-2,870,340 | AX-30009541  |
| KCNQ1 | rs140146748 | chr11:2,466,221-2,870,340 | AX-96761399  |
| KCNQ1 | rs74847994  | chr11:2,466,221-2,870,340 | AX-156279816 |
| KCNQ1 | rs74847994  | chr11:2,466,221-2,870,340 | AX-156295404 |

|       |             |                           |              |
|-------|-------------|---------------------------|--------------|
| KCNQ1 | rs77307322  | chr11:2,466,221-2,870,340 | AX-96949210  |
| KCNQ1 | rs77307322  | chr11:2,466,221-2,870,340 | AX-96951328  |
| KCNQ1 | rs16928366  | chr11:2,466,221-2,870,340 | AX-96755733  |
| KCNQ1 | rs6578270   | chr11:2,466,221-2,870,340 | AX-30009559  |
| KCNQ1 | rs74899747  | chr11:2,466,221-2,870,340 | AX-30009563  |
| KCNQ1 | rs74392867  | chr11:2,466,221-2,870,340 | AX-30009569  |
| KCNQ1 | rs2237869   | chr11:2,466,221-2,870,340 | AX-96561656  |
| KCNQ1 | rs2237869   | chr11:2,466,221-2,870,340 | AX-96645225  |
| KCNQ1 | ---         | chr11:2,466,221-2,870,340 | AX-37510515  |
| KCNQ1 | ---         | chr11:2,466,221-2,870,340 | AX-97361556  |
| KCNQ1 | rs2237871   | chr11:2,466,221-2,870,340 | AX-113408381 |
| KCNQ1 | rs2237871   | chr11:2,466,221-2,870,340 | AX-113964892 |
| KCNQ1 | rs2237872   | chr11:2,466,221-2,870,340 | AX-96645530  |
| KCNQ1 | rs74048650  | chr11:2,466,221-2,870,340 | AX-156289276 |
| KCNQ1 | ---         | chr11:2,466,221-2,870,340 | AX-113482220 |
| KCNQ1 | ---         | chr11:2,466,221-2,870,340 | AX-113891029 |
| KCNQ1 | rs736610    | chr11:2,466,221-2,870,340 | AX-96564030  |
| KCNQ1 | rs757085    | chr11:2,466,221-2,870,340 | AX-96840998  |
| KCNQ1 | rs757085    | chr11:2,466,221-2,870,340 | AX-96855954  |
| KCNQ1 | rs729980    | chr11:2,466,221-2,870,340 | AX-96784291  |
| KCNQ1 | rs729980    | chr11:2,466,221-2,870,340 | AX-97357006  |
| KCNQ1 | rs729979    | chr11:2,466,221-2,870,340 | AX-112924590 |
| KCNQ1 | rs729979    | chr11:2,466,221-2,870,340 | AX-113481271 |
| KCNQ1 | rs73419575  | chr11:2,466,221-2,870,340 | AX-156279817 |
| KCNQ1 | rs73419575  | chr11:2,466,221-2,870,340 | AX-156295405 |
| KCNQ1 | rs10741643  | chr11:2,466,221-2,870,340 | AX-39037185  |
| KCNQ1 | rs1005135   | chr11:2,466,221-2,870,340 | AX-30009659  |
| KCNQ1 | rs1005623   | chr11:2,466,221-2,870,340 | AX-96815177  |
| KCNQ1 | rs72847655  | chr11:2,466,221-2,870,340 | AX-30009679  |
| KCNQ1 | ---         | chr11:2,466,221-2,870,340 | AX-96560265  |
| KCNQ1 | rs35973912  | chr11:2,466,221-2,870,340 | AX-30009695  |
| KCNQ1 | rs146122513 | chr11:2,466,221-2,870,340 | AX-96866696  |
| KCNQ1 | rs34164775  | chr11:2,466,221-2,870,340 | AX-96941469  |
| KCNQ1 | rs11826873  | chr11:2,466,221-2,870,340 | AX-96563867  |
| KCNQ1 | rs11826873  | chr11:2,466,221-2,870,340 | AX-96647436  |
| KCNQ1 | rs7110139   | chr11:2,466,221-2,870,340 | AX-30009705  |
| KCNQ1 | rs72847658  | chr11:2,466,221-2,870,340 | AX-96565436  |
| KCNQ1 | rs2898873   | chr11:2,466,221-2,870,340 | AX-30009729  |
| KCNQ1 | rs7935227   | chr11:2,466,221-2,870,340 | AX-39037209  |
| KCNQ1 | rs56331974  | chr11:2,466,221-2,870,340 | AX-30009749  |
| KCNQ1 | rs79295543  | chr11:2,466,221-2,870,340 | AX-30009755  |
| KCNQ1 | rs200988578 | chr11:2,466,221-2,870,340 | AX-96994243  |
| KCNQ1 | rs10400365  | chr11:2,466,221-2,870,340 | AX-30009763  |
| KCNQ1 | rs73419593  | chr11:2,466,221-2,870,340 | AX-156265994 |
| KCNQ1 | rs73419593  | chr11:2,466,221-2,870,340 | AX-156286653 |
| KCNQ1 | rs73419595  | chr11:2,466,221-2,870,340 | AX-30009777  |
| KCNQ1 | rs77059665  | chr11:2,466,221-2,870,340 | AX-156265995 |
| KCNQ1 | rs77059665  | chr11:2,466,221-2,870,340 | AX-156286654 |
| KCNQ1 | rs150949289 | chr11:2,466,221-2,870,340 | AX-96813387  |
| KCNQ1 | rs149377170 | chr11:2,466,221-2,870,340 | AX-151137338 |
| KCNQ1 | rs77686561  | chr11:2,466,221-2,870,340 | AX-30009843  |
| KCNQ1 | rs2283150   | chr11:2,466,221-2,870,340 | AX-96953475  |
| KCNQ1 | rs2283151   | chr11:2,466,221-2,870,340 | AX-30009869  |
| KCNQ1 | rs4930119   | chr11:2,466,221-2,870,340 | AX-39037255  |
| KCNQ1 | rs150878926 | chr11:2,466,221-2,870,340 | AX-97411972  |

|       |             |                           |              |
|-------|-------------|---------------------------|--------------|
| KCNQ1 | rs7111699   | chr11:2,466,221-2,870,340 | AX-96774631  |
| KCNQ1 | rs7111699   | chr11:2,466,221-2,870,340 | AX-96785402  |
| KCNQ1 | rs4930120   | chr11:2,466,221-2,870,340 | AX-88783175  |
| KCNQ1 | rs4930120   | chr11:2,466,221-2,870,340 | AX-96904070  |
| KCNQ1 | rs7122214   | chr11:2,466,221-2,870,340 | AX-92430257  |
| KCNQ1 | rs7122214   | chr11:2,466,221-2,870,340 | AX-96965175  |
| KCNQ1 | rs7122318   | chr11:2,466,221-2,870,340 | AX-11608236  |
| KCNQ1 | rs143820001 | chr11:2,466,221-2,870,340 | AX-148860779 |
| KCNQ1 | rs143820001 | chr11:2,466,221-2,870,340 | AX-92379004  |
| KCNQ1 | rs2283152   | chr11:2,466,221-2,870,340 | AX-107885436 |
| KCNQ1 | rs2283152   | chr11:2,466,221-2,870,340 | AX-113960358 |
| KCNQ1 | rs2283153   | chr11:2,466,221-2,870,340 | AX-96884694  |
| KCNQ1 | rs117305030 | chr11:2,466,221-2,870,340 | AX-37510527  |
| KCNQ1 | rs1010173   | chr11:2,466,221-2,870,340 | AX-97415696  |
| KCNQ1 | rs2283154   | chr11:2,466,221-2,870,340 | AX-96888829  |
| KCNQ1 | rs2283154   | chr11:2,466,221-2,870,340 | AX-97317538  |
| KCNQ1 | rs573946448 | chr11:2,466,221-2,870,340 | AX-151441171 |
| KCNQ1 | rs573946448 | chr11:2,466,221-2,870,340 | AX-156286195 |
| KCNQ1 | rs7952607   | chr11:2,466,221-2,870,340 | AX-156270460 |
| KCNQ1 | rs7952607   | chr11:2,466,221-2,870,340 | AX-156289277 |
| KCNQ1 | rs2299616   | chr11:2,466,221-2,870,340 | AX-30010015  |
| KCNQ1 | rs115332873 | chr11:2,466,221-2,870,340 | AX-156278489 |
| KCNQ1 | rs2299617   | chr11:2,466,221-2,870,340 | AX-39037339  |
| KCNQ1 | rs179426    | chr11:2,466,221-2,870,340 | AX-39037351  |
| KCNQ1 | rs141747786 | chr11:2,466,221-2,870,340 | AX-96876057  |
| KCNQ1 | rs141747786 | chr11:2,466,221-2,870,340 | AX-97447749  |
| KCNQ1 | rs76361309  | chr11:2,466,221-2,870,340 | AX-96908893  |
| KCNQ1 | rs76361309  | chr11:2,466,221-2,870,340 | AX-97298797  |
| KCNQ1 | rs28730663  | chr11:2,466,221-2,870,340 | AX-30010157  |
| KCNQ1 | ---         | chr11:2,466,221-2,870,340 | AX-90034908  |
| KCNQ1 | ---         | chr11:2,466,221-2,870,340 | AX-86615252  |
| KCNQ1 | ---         | chr11:2,466,221-2,870,340 | AX-90062322  |
| KCNQ1 | ---         | chr11:2,466,221-2,870,340 | AX-90059884  |
| KCNQ1 | ---         | chr11:2,466,221-2,870,340 | AX-90045608  |
| KCNQ1 | ---         | chr11:2,466,221-2,870,340 | AX-90062842  |
| KCNQ1 | ---         | chr11:2,466,221-2,870,340 | AX-86666855  |
| KCNQ1 | rs120074192 | chr11:2,466,221-2,870,340 | AX-88752648  |
| KCNQ1 | ---         | chr11:2,466,221-2,870,340 | AX-90055496  |
| KCNQ1 | ---         | chr11:2,466,221-2,870,340 | AX-90064144  |
| KCNQ1 | ---         | chr11:2,466,221-2,870,340 | AX-30010163  |
| KCNQ1 | ---         | chr11:2,466,221-2,870,340 | AX-90059604  |
| KCNQ1 | ---         | chr11:2,466,221-2,870,340 | AX-90026612  |
| KCNQ1 | ---         | chr11:2,466,221-2,870,340 | AX-90036520  |
| KCNQ1 | rs397508110 | chr11:2,466,221-2,870,340 | AX-90079144  |
| KCNQ1 | rs143709408 | chr11:2,466,221-2,870,340 | AX-83344090  |
| KCNQ1 | ---         | chr11:2,466,221-2,870,340 | AX-90057004  |
| KCNQ1 | ---         | chr11:2,466,221-2,870,340 | AX-90059217  |
| KCNQ1 | ---         | chr11:2,466,221-2,870,340 | AX-90059317  |
| KCNQ1 | ---         | chr11:2,466,221-2,870,340 | AX-90061265  |
| KCNQ1 | rs199528268 | chr11:2,466,221-2,870,340 | AX-96564799  |
| KCNQ1 | rs199528268 | chr11:2,466,221-2,870,340 | AX-96648368  |
| KCNQ1 | rs179428    | chr11:2,466,221-2,870,340 | AX-39037437  |
| KCNQ1 | rs179429    | chr11:2,466,221-2,870,340 | AX-39037441  |
| KCNQ1 | rs179430    | chr11:2,466,221-2,870,340 | AX-39037445  |
| KCNQ1 | rs146130910 | chr11:2,466,221-2,870,340 | AX-96830779  |

|       |             |                           |              |
|-------|-------------|---------------------------|--------------|
| KCNQ1 | rs146130910 | chr11:2,466,221-2,870,340 | AX-97330087  |
| KCNQ1 | rs1557647   | chr11:2,466,221-2,870,340 | AX-39037459  |
| KCNQ1 | rs179431    | chr11:2,466,221-2,870,340 | AX-39037471  |
| KCNQ1 | rs7119884   | chr11:2,466,221-2,870,340 | AX-39037475  |
| KCNQ1 | rs2522006   | chr11:2,466,221-2,870,340 | AX-113885781 |
| KCNQ1 | rs2522007   | chr11:2,466,221-2,870,340 | AX-96648983  |
| KCNQ1 | rs2522008   | chr11:2,466,221-2,870,340 | AX-96564129  |
| KCNQ1 | rs11823023  | chr11:2,466,221-2,870,340 | AX-96976956  |
| KCNQ1 | rs11823023  | chr11:2,466,221-2,870,340 | AX-97474623  |
| KCNQ1 | rs72847667  | chr11:2,466,221-2,870,340 | AX-30010345  |
| KCNQ1 | rs111815403 | chr11:2,466,221-2,870,340 | AX-30010347  |
| KCNQ1 | rs179432    | chr11:2,466,221-2,870,340 | AX-30010357  |
| KCNQ1 | rs179433    | chr11:2,466,221-2,870,340 | AX-30010359  |
| KCNQ1 | rs179434    | chr11:2,466,221-2,870,340 | AX-30010361  |
| KCNQ1 | rs179435    | chr11:2,466,221-2,870,340 | AX-96853558  |
| KCNQ1 | rs179435    | chr11:2,466,221-2,870,340 | AX-97358518  |
| KCNQ1 | rs179436    | chr11:2,466,221-2,870,340 | AX-30010385  |
| KCNQ1 | rs179437    | chr11:2,466,221-2,870,340 | AX-30010445  |
| KCNQ1 | rs2074247   | chr11:2,466,221-2,870,340 | AX-96563751  |
| KCNQ1 | rs2074247   | chr11:2,466,221-2,870,340 | AX-96647320  |
| KCNQ1 | rs72847668  | chr11:2,466,221-2,870,340 | AX-30010473  |
| KCNQ1 | rs2074248   | chr11:2,466,221-2,870,340 | AX-30010475  |
| KCNQ1 | rs757086    | chr11:2,466,221-2,870,340 | AX-84661815  |
| KCNQ1 | rs56169764  | chr11:2,466,221-2,870,340 | AX-96750310  |
| KCNQ1 | rs56169764  | chr11:2,466,221-2,870,340 | AX-97385429  |
| KCNQ1 | rs112818110 | chr11:2,466,221-2,870,340 | AX-30010529  |
| KCNQ1 | rs72847670  | chr11:2,466,221-2,870,340 | AX-30010561  |
| KCNQ1 | rs72847671  | chr11:2,466,221-2,870,340 | AX-30010565  |
| KCNQ1 | rs115894051 | chr11:2,466,221-2,870,340 | AX-37510541  |
| KCNQ1 | rs58978657  | chr11:2,466,221-2,870,340 | AX-30010649  |
| KCNQ1 | rs72847673  | chr11:2,466,221-2,870,340 | AX-148807367 |
| KCNQ1 | rs72847673  | chr11:2,466,221-2,870,340 | AX-156265996 |
| KCNQ1 | rs75458755  | chr11:2,466,221-2,870,340 | AX-151421214 |
| KCNQ1 | rs75458755  | chr11:2,466,221-2,870,340 | AX-156265997 |
| KCNQ1 | rs10832270  | chr11:2,466,221-2,870,340 | AX-96561688  |
| KCNQ1 | rs10832270  | chr11:2,466,221-2,870,340 | AX-96645257  |
| KCNQ1 | rs10832272  | chr11:2,466,221-2,870,340 | AX-96560209  |
| KCNQ1 | rs10832272  | chr11:2,466,221-2,870,340 | AX-96643778  |
| KCNQ1 | rs72847674  | chr11:2,466,221-2,870,340 | AX-30010685  |
| KCNQ1 | rs179440    | chr11:2,466,221-2,870,340 | AX-96772647  |
| KCNQ1 | rs179440    | chr11:2,466,221-2,870,340 | AX-96783429  |
| KCNQ1 | rs60705296  | chr11:2,466,221-2,870,340 | AX-96831420  |
| KCNQ1 | rs60705296  | chr11:2,466,221-2,870,340 | AX-97364607  |
| KCNQ1 | rs72847675  | chr11:2,466,221-2,870,340 | AX-156295406 |
| KCNQ1 | rs79630929  | chr11:2,466,221-2,870,340 | AX-30010717  |
| KCNQ1 | rs72847676  | chr11:2,466,221-2,870,340 | AX-30010725  |
| KCNQ1 | rs179441    | chr11:2,466,221-2,870,340 | AX-39037677  |
| KCNQ1 | rs75436503  | chr11:2,466,221-2,870,340 | AX-30010741  |
| KCNQ1 | rs112106242 | chr11:2,466,221-2,870,340 | AX-156270461 |
| KCNQ1 | rs112106242 | chr11:2,466,221-2,870,340 | AX-156289278 |
| KCNQ1 | rs111655717 | chr11:2,466,221-2,870,340 | AX-30010749  |
| KCNQ1 | rs56314930  | chr11:2,466,221-2,870,340 | AX-30010755  |
| KCNQ1 | rs1997619   | chr11:2,466,221-2,870,340 | AX-96776414  |
| KCNQ1 | rs1997619   | chr11:2,466,221-2,870,340 | AX-96782933  |
| KCNQ1 | rs9299929   | chr11:2,466,221-2,870,340 | AX-39037705  |

|       |             |                           |              |
|-------|-------------|---------------------------|--------------|
| KCNQ1 | rs72847677  | chr11:2,466,221-2,870,340 | AX-30010823  |
| KCNQ1 | rs75670474  | chr11:2,466,221-2,870,340 | AX-156270462 |
| KCNQ1 | rs75670474  | chr11:2,466,221-2,870,340 | AX-156289279 |
| KCNQ1 | rs3944148   | chr11:2,466,221-2,870,340 | AX-112994387 |
| KCNQ1 | rs3944148   | chr11:2,466,221-2,870,340 | AX-113403082 |
| KCNQ1 | rs16928429  | chr11:2,466,221-2,870,340 | AX-30010865  |
| KCNQ1 | rs111229068 | chr11:2,466,221-2,870,340 | AX-30010869  |
| KCNQ1 | rs2157762   | chr11:2,466,221-2,870,340 | AX-96560653  |
| KCNQ1 | rs2157762   | chr11:2,466,221-2,870,340 | AX-96644222  |
| KCNQ1 | ---         | chr11:2,466,221-2,870,340 | AX-30010897  |
| KCNQ1 | rs7924846   | chr11:2,466,221-2,870,340 | AX-39037757  |
| KCNQ1 | rs6578271   | chr11:2,466,221-2,870,340 | AX-96562685  |
| KCNQ1 | rs6578271   | chr11:2,466,221-2,870,340 | AX-96646254  |
| KCNQ1 | ---         | chr11:2,466,221-2,870,340 | AX-96785739  |
| KCNQ1 | rs28808586  | chr11:2,466,221-2,870,340 | AX-96957261  |
| KCNQ1 | rs141644896 | chr11:2,466,221-2,870,340 | AX-144919209 |
| KCNQ1 | rs12575355  | chr11:2,466,221-2,870,340 | AX-96957158  |
| KCNQ1 | rs7129955   | chr11:2,466,221-2,870,340 | AX-112994389 |
| KCNQ1 | rs7130209   | chr11:2,466,221-2,870,340 | AX-16568639  |
| KCNQ1 | rs56271700  | chr11:2,466,221-2,870,340 | AX-144888913 |
| KCNQ1 | rs2188197   | chr11:2,466,221-2,870,340 | AX-115170317 |
| KCNQ1 | rs2188197   | chr11:2,466,221-2,870,340 | AX-96653332  |
| KCNQ1 | rs2188198   | chr11:2,466,221-2,870,340 | AX-84663247  |
| KCNQ1 | rs2188198   | chr11:2,466,221-2,870,340 | AX-97480243  |
| KCNQ1 | rs2283156   | chr11:2,466,221-2,870,340 | AX-156270463 |
| KCNQ1 | rs2283156   | chr11:2,466,221-2,870,340 | AX-156289280 |
| KCNQ1 | rs2283158   | chr11:2,466,221-2,870,340 | AX-39037879  |
| KCNQ1 | rs2283161   | chr11:2,466,221-2,870,340 | AX-12524108  |
| KCNQ1 | rs12797687  | chr11:2,466,221-2,870,340 | AX-113899828 |
| KCNQ1 | rs12797687  | chr11:2,466,221-2,870,340 | AX-113973693 |
| KCNQ1 | rs12292841  | chr11:2,466,221-2,870,340 | AX-11199366  |
| KCNQ1 | rs9704526   | chr11:2,466,221-2,870,340 | AX-96562442  |
| KCNQ1 | rs9704526   | chr11:2,466,221-2,870,340 | AX-96646011  |
| KCNQ1 | rs2283162   | chr11:2,466,221-2,870,340 | AX-16568763  |
| KCNQ1 | rs34960665  | chr11:2,466,221-2,870,340 | AX-97304162  |
| KCNQ1 | rs34226314  | chr11:2,466,221-2,870,340 | AX-12551737  |
| KCNQ1 | rs12291654  | chr11:2,466,221-2,870,340 | AX-113959669 |
| KCNQ1 | rs12283510  | chr11:2,466,221-2,870,340 | AX-39037931  |
| KCNQ1 | rs11023261  | chr11:2,466,221-2,870,340 | AX-39037953  |
| KCNQ1 | rs4539307   | chr11:2,466,221-2,870,340 | AX-11509588  |
| KCNQ1 | rs9299930   | chr11:2,466,221-2,870,340 | AX-39037985  |
| KCNQ1 | rs11023267  | chr11:2,466,221-2,870,340 | AX-11138571  |
| KCNQ1 | ---         | chr11:2,466,221-2,870,340 | AX-96847159  |
| KCNQ1 | ---         | chr11:2,466,221-2,870,340 | AX-97258530  |
| KCNQ1 | rs374755711 | chr11:2,466,221-2,870,340 | AX-144929990 |
| KCNQ1 | rs200154711 | chr11:2,466,221-2,870,340 | AX-96893292  |
| KCNQ1 | rs201229057 | chr11:2,466,221-2,870,340 | AX-144929900 |
| KCNQ1 | rs202125097 | chr11:2,466,221-2,870,340 | AX-144930160 |
| KCNQ1 | rs10430833  | chr11:2,466,221-2,870,340 | AX-11106480  |
| KCNQ1 | rs11828404  | chr11:2,466,221-2,870,340 | AX-96839875  |
| KCNQ1 | rs11828404  | chr11:2,466,221-2,870,340 | AX-97318161  |
| KCNQ1 | rs11826219  | chr11:2,466,221-2,870,340 | AX-30011419  |
| KCNQ1 | rs2283163   | chr11:2,466,221-2,870,340 | AX-30011441  |
| KCNQ1 | rs73404640  | chr11:2,466,221-2,870,340 | AX-156270464 |
| KCNQ1 | rs73404640  | chr11:2,466,221-2,870,340 | AX-156289281 |

|       |             |                           |              |
|-------|-------------|---------------------------|--------------|
| KCNQ1 | rs4930122   | chr11:2,466,221-2,870,340 | AX-96868766  |
| KCNQ1 | rs4930122   | chr11:2,466,221-2,870,340 | AX-96896740  |
| KCNQ1 | rs4930123   | chr11:2,466,221-2,870,340 | AX-30011477  |
| KCNQ1 | rs75501030  | chr11:2,466,221-2,870,340 | AX-30011481  |
| KCNQ1 | rs73404645  | chr11:2,466,221-2,870,340 | AX-156270465 |
| KCNQ1 | rs73404645  | chr11:2,466,221-2,870,340 | AX-156289282 |
| KCNQ1 | rs73404647  | chr11:2,466,221-2,870,340 | AX-16568934  |
| KCNQ1 | rs74393603  | chr11:2,466,221-2,870,340 | AX-37510579  |
| KCNQ1 | rs11023290  | chr11:2,466,221-2,870,340 | AX-96743347  |
| KCNQ1 | rs11023290  | chr11:2,466,221-2,870,340 | AX-97343555  |
| KCNQ1 | rs2283164   | chr11:2,466,221-2,870,340 | AX-39038153  |
| KCNQ1 | rs2283165   | chr11:2,466,221-2,870,340 | AX-30011561  |
| KCNQ1 | rs2283166   | chr11:2,466,221-2,870,340 | AX-96562530  |
| KCNQ1 | rs2283166   | chr11:2,466,221-2,870,340 | AX-96646099  |
| KCNQ1 | rs2283167   | chr11:2,466,221-2,870,340 | AX-30011597  |
| KCNQ1 | rs2283168   | chr11:2,466,221-2,870,340 | AX-30011613  |
| KCNQ1 | rs2283169   | chr11:2,466,221-2,870,340 | AX-95851477  |
| KCNQ1 | rs7936703   | chr11:2,466,221-2,870,340 | AX-96565356  |
| KCNQ1 | rs7936703   | chr11:2,466,221-2,870,340 | AX-96648925  |
| KCNQ1 | rs73404652  | chr11:2,466,221-2,870,340 | AX-30011651  |
| KCNQ1 | rs73404655  | chr11:2,466,221-2,870,340 | AX-96907266  |
| KCNQ1 | rs73404655  | chr11:2,466,221-2,870,340 | AX-96926834  |
| KCNQ1 | rs28451516  | chr11:2,466,221-2,870,340 | AX-30011675  |
| KCNQ1 | rs142215501 | chr11:2,466,221-2,870,340 | AX-96565492  |
| KCNQ1 | rs146770373 | chr11:2,466,221-2,870,340 | AX-148762290 |
| KCNQ1 | rs146770373 | chr11:2,466,221-2,870,340 | AX-156283668 |
| KCNQ1 | rs7941421   | chr11:2,466,221-2,870,340 | AX-88746076  |
| KCNQ1 | rs7941421   | chr11:2,466,221-2,870,340 | AX-97407724  |
| KCNQ1 | rs7944551   | chr11:2,466,221-2,870,340 | AX-90038356  |
| KCNQ1 | rs7944551   | chr11:2,466,221-2,870,340 | AX-96875030  |
| KCNQ1 | rs7944557   | chr11:2,466,221-2,870,340 | AX-96560358  |
| KCNQ1 | rs7944557   | chr11:2,466,221-2,870,340 | AX-96643927  |
| KCNQ1 | rs2283170   | chr11:2,466,221-2,870,340 | AX-96562615  |
| KCNQ1 | rs12802897  | chr11:2,466,221-2,870,340 | AX-30011807  |
| KCNQ1 | rs12803012  | chr11:2,466,221-2,870,340 | AX-96984771  |
| KCNQ1 | rs12803012  | chr11:2,466,221-2,870,340 | AX-96986903  |
| KCNQ1 | rs4929995   | chr11:2,466,221-2,870,340 | AX-30011823  |
| KCNQ1 | rs74048684  | chr11:2,466,221-2,870,340 | AX-96985801  |
| KCNQ1 | rs74048684  | chr11:2,466,221-2,870,340 | AX-97305777  |
| KCNQ1 | rs12363216  | chr11:2,466,221-2,870,340 | AX-30011833  |
| KCNQ1 | rs7101739   | chr11:2,466,221-2,870,340 | AX-96564436  |
| KCNQ1 | rs7101739   | chr11:2,466,221-2,870,340 | AX-96648005  |
| KCNQ1 | rs12221520  | chr11:2,466,221-2,870,340 | AX-30011879  |
| KCNQ1 | rs11600454  | chr11:2,466,221-2,870,340 | AX-30011885  |
| KCNQ1 | rs12279846  | chr11:2,466,221-2,870,340 | AX-30011895  |
| KCNQ1 | rs7942492   | chr11:2,466,221-2,870,340 | AX-96979802  |
| KCNQ1 | rs7942492   | chr11:2,466,221-2,870,340 | AX-97338084  |
| KCNQ1 | rs80111484  | chr11:2,466,221-2,870,340 | AX-96987980  |
| KCNQ1 | rs80111484  | chr11:2,466,221-2,870,340 | AX-97386871  |
| KCNQ1 | rs12280123  | chr11:2,466,221-2,870,340 | AX-30011925  |
| KCNQ1 | rs11820485  | chr11:2,466,221-2,870,340 | AX-96889784  |
| KCNQ1 | rs11820485  | chr11:2,466,221-2,870,340 | AX-97454947  |
| KCNQ1 | rs11820026  | chr11:2,466,221-2,870,340 | AX-96817846  |
| KCNQ1 | rs11820026  | chr11:2,466,221-2,870,340 | AX-97480886  |
| KCNQ1 | rs75606621  | chr11:2,466,221-2,870,340 | AX-30011947  |



|       |             |                           |              |
|-------|-------------|---------------------------|--------------|
| KCNQ1 | rs11822186  | chr11:2,466,221-2,870,340 | AX-30011949  |
| KCNQ1 | rs6578273   | chr11:2,466,221-2,870,340 | AX-39038411  |
| KCNQ1 | rs7118348   | chr11:2,466,221-2,870,340 | AX-96945867  |
| KCNQ1 | rs7118348   | chr11:2,466,221-2,870,340 | AX-97422813  |
| KCNQ1 | rs35951054  | chr11:2,466,221-2,870,340 | AX-30012027  |
| KCNQ1 | rs73404673  | chr11:2,466,221-2,870,340 | AX-30012061  |
| KCNQ1 | rs73404674  | chr11:2,466,221-2,870,340 | AX-156279819 |
| KCNQ1 | rs179484    | chr11:2,466,221-2,870,340 | AX-96562018  |
| KCNQ1 | rs179484    | chr11:2,466,221-2,870,340 | AX-96645587  |
| KCNQ1 | rs113962056 | chr11:2,466,221-2,870,340 | AX-96951438  |
| KCNQ1 | rs113962056 | chr11:2,466,221-2,870,340 | AX-97415482  |
| KCNQ1 | rs179486    | chr11:2,466,221-2,870,340 | AX-30012089  |
| KCNQ1 | rs7119191   | chr11:2,466,221-2,870,340 | AX-30012095  |
| KCNQ1 | rs76003132  | chr11:2,466,221-2,870,340 | AX-30012113  |
| KCNQ1 | rs6578274   | chr11:2,466,221-2,870,340 | AX-96564844  |
| KCNQ1 | rs114339307 | chr11:2,466,221-2,870,340 | AX-97339384  |
| KCNQ1 | rs114339307 | chr11:2,466,221-2,870,340 | AX-97453275  |
| KCNQ1 | rs148166405 | chr11:2,466,221-2,870,340 | AX-151399065 |
| KCNQ1 | rs148166405 | chr11:2,466,221-2,870,340 | AX-96965720  |
| KCNQ1 | rs145699003 | chr11:2,466,221-2,870,340 | AX-96961598  |
| KCNQ1 | rs145699003 | chr11:2,466,221-2,870,340 | AX-97339392  |
| KCNQ1 | rs188052441 | chr11:2,466,221-2,870,340 | AX-96754944  |
| KCNQ1 | rs188052441 | chr11:2,466,221-2,870,340 | AX-97443430  |
| KCNQ1 | rs192149751 | chr11:2,466,221-2,870,340 | AX-96864017  |
| KCNQ1 | rs192149751 | chr11:2,466,221-2,870,340 | AX-97307136  |
| KCNQ1 | rs72482705  | chr11:2,466,221-2,870,340 | AX-96560530  |
| KCNQ1 | rs72482705  | chr11:2,466,221-2,870,340 | AX-96644099  |
| KCNQ1 | rs73404676  | chr11:2,466,221-2,870,340 | AX-30012149  |
| KCNQ1 | rs73404678  | chr11:2,466,221-2,870,340 | AX-96740091  |
| KCNQ1 | rs73404678  | chr11:2,466,221-2,870,340 | AX-97418243  |
| KCNQ1 | rs28730752  | chr11:2,466,221-2,870,340 | AX-30012157  |
| KCNQ1 | ---         | chr11:2,466,221-2,870,340 | AX-90034552  |
| KCNQ1 | ---         | chr11:2,466,221-2,870,340 | AX-90036143  |
| KCNQ1 | ---         | chr11:2,466,221-2,870,340 | AX-90027416  |
| KCNQ1 | rs397508112 | chr11:2,466,221-2,870,340 | AX-90051412  |
| KCNQ1 | ---         | chr11:2,466,221-2,870,340 | AX-90030622  |
| KCNQ1 | ---         | chr11:2,466,221-2,870,340 | AX-90050963  |
| KCNQ1 | ---         | chr11:2,466,221-2,870,340 | AX-90061436  |
| KCNQ1 | ---         | chr11:2,466,221-2,870,340 | AX-90060483  |
| KCNQ1 | ---         | chr11:2,466,221-2,870,340 | AX-90065739  |
| KCNQ1 | ---         | chr11:2,466,221-2,870,340 | AX-90056800  |
| KCNQ1 | ---         | chr11:2,466,221-2,870,340 | AX-90076686  |
| KCNQ1 | ---         | chr11:2,466,221-2,870,340 | AX-90059820  |
| KCNQ1 | ---         | chr11:2,466,221-2,870,340 | AX-90060527  |
| KCNQ1 | ---         | chr11:2,466,221-2,870,340 | AX-90034166  |
| KCNQ1 | ---         | chr11:2,466,221-2,870,340 | AX-90061070  |
| KCNQ1 | ---         | chr11:2,466,221-2,870,340 | AX-86618250  |
| KCNQ1 | ---         | chr11:2,466,221-2,870,340 | AX-90055801  |
| KCNQ1 | rs199473394 | chr11:2,466,221-2,870,340 | AX-86732896  |
| KCNQ1 | ---         | chr11:2,466,221-2,870,340 | AX-86569551  |
| KCNQ1 | ---         | chr11:2,466,221-2,870,340 | AX-90028973  |
| KCNQ1 | ---         | chr11:2,466,221-2,870,340 | AX-90029912  |
| KCNQ1 | ---         | chr11:2,466,221-2,870,340 | AX-90027758  |
| KCNQ1 | ---         | chr11:2,466,221-2,870,340 | AX-90035023  |
| KCNQ1 | rs397508116 | chr11:2,466,221-2,870,340 | AX-90050245  |

|       |             |                           |              |
|-------|-------------|---------------------------|--------------|
| KCNQ1 | ---         | chr11:2,466,221-2,870,340 | AX-90031719  |
| KCNQ1 | ---         | chr11:2,466,221-2,870,340 | AX-90031807  |
| KCNQ1 | ---         | chr11:2,466,221-2,870,340 | AX-90037131  |
| KCNQ1 | ---         | chr11:2,466,221-2,870,340 | AX-86684434  |
| KCNQ1 | ---         | chr11:2,466,221-2,870,340 | AX-90026917  |
| KCNQ1 | ---         | chr11:2,466,221-2,870,340 | AX-90076459  |
| KCNQ1 | ---         | chr11:2,466,221-2,870,340 | AX-90061696  |
| KCNQ1 | ---         | chr11:2,466,221-2,870,340 | AX-90027762  |
| KCNQ1 | ---         | chr11:2,466,221-2,870,340 | AX-90030449  |
| KCNQ1 | ---         | chr11:2,466,221-2,870,340 | AX-90061240  |
| KCNQ1 | rs397508119 | chr11:2,466,221-2,870,340 | AX-90034815  |
| KCNQ1 | ---         | chr11:2,466,221-2,870,340 | AX-90030969  |
| KCNQ1 | ---         | chr11:2,466,221-2,870,340 | AX-90061769  |
| KCNQ1 | ---         | chr11:2,466,221-2,870,340 | AX-90056088  |
| KCNQ1 | ---         | chr11:2,466,221-2,870,340 | AX-90030589  |
| KCNQ1 | rs112946114 | chr11:2,466,221-2,870,340 | AX-30012173  |
| KCNQ1 | rs73404679  | chr11:2,466,221-2,870,340 | AX-30012179  |
| KCNQ1 | rs7946012   | chr11:2,466,221-2,870,340 | AX-39038493  |
| KCNQ1 | ---         | chr11:2,466,221-2,870,340 | AX-90064000  |
| KCNQ1 | ---         | chr11:2,466,221-2,870,340 | AX-90066080  |
| KCNQ1 | ---         | chr11:2,466,221-2,870,340 | AX-90057795  |
| KCNQ1 | ---         | chr11:2,466,221-2,870,340 | AX-90063397  |
| KCNQ1 | rs151344631 | chr11:2,466,221-2,870,340 | AX-86694782  |
| KCNQ1 | ---         | chr11:2,466,221-2,870,340 | AX-90079106  |
| KCNQ1 | ---         | chr11:2,466,221-2,870,340 | AX-90055498  |
| KCNQ1 | ---         | chr11:2,466,221-2,870,340 | AX-90061893  |
| KCNQ1 | rs17215479  | chr11:2,466,221-2,870,340 | AX-86572909  |
| KCNQ1 | ---         | chr11:2,466,221-2,870,340 | AX-90027959  |
| KCNQ1 | ---         | chr11:2,466,221-2,870,340 | AX-90034486  |
| KCNQ1 | ---         | chr11:2,466,221-2,870,340 | AX-90029615  |
| KCNQ1 | rs4930126   | chr11:2,466,221-2,870,340 | AX-144899892 |
| KCNQ1 | rs4930126   | chr11:2,466,221-2,870,340 | AX-144921502 |
| KCNQ1 | ---         | chr11:2,466,221-2,870,340 | AX-90062784  |
| KCNQ1 | ---         | chr11:2,466,221-2,870,340 | AX-90031845  |
| KCNQ1 | ---         | chr11:2,466,221-2,870,340 | AX-90059310  |
| KCNQ1 | ---         | chr11:2,466,221-2,870,340 | AX-90033121  |
| KCNQ1 | ---         | chr11:2,466,221-2,870,340 | AX-90036123  |
| KCNQ1 | ---         | chr11:2,466,221-2,870,340 | AX-90028262  |
| KCNQ1 | ---         | chr11:2,466,221-2,870,340 | AX-90029242  |
| KCNQ1 | ---         | chr11:2,466,221-2,870,340 | AX-90028089  |
| KCNQ1 | ---         | chr11:2,466,221-2,870,340 | AX-90065237  |
| KCNQ1 | ---         | chr11:2,466,221-2,870,340 | AX-90063417  |
| KCNQ1 | rs12786951  | chr11:2,466,221-2,870,340 | AX-96812811  |
| KCNQ1 | rs12786951  | chr11:2,466,221-2,870,340 | AX-96814890  |
| KCNQ1 | rs12574935  | chr11:2,466,221-2,870,340 | AX-30012257  |
| KCNQ1 | rs41282926  | chr11:2,466,221-2,870,340 | AX-30012273  |
| KCNQ1 | rs4930127   | chr11:2,466,221-2,870,340 | AX-96562310  |
| KCNQ1 | rs4930127   | chr11:2,466,221-2,870,340 | AX-96645879  |
| KCNQ1 | ---         | chr11:2,466,221-2,870,340 | AX-90056218  |
| KCNQ1 | ---         | chr11:2,466,221-2,870,340 | AX-90064678  |
| KCNQ1 | ---         | chr11:2,466,221-2,870,340 | AX-90061212  |
| KCNQ1 | ---         | chr11:2,466,221-2,870,340 | AX-90060517  |
| KCNQ1 | ---         | chr11:2,466,221-2,870,340 | AX-90028222  |
| KCNQ1 | ---         | chr11:2,466,221-2,870,340 | AX-90045693  |
| KCNQ1 | ---         | chr11:2,466,221-2,870,340 | AX-90032453  |

|       |             |                           |              |
|-------|-------------|---------------------------|--------------|
| KCNQ1 | rs120074193 | chr11:2,466,221-2,870,340 | AX-90040402  |
| KCNQ1 | rs120074194 | chr11:2,466,221-2,870,340 | AX-90069289  |
| KCNQ1 | ---         | chr11:2,466,221-2,870,340 | AX-90034229  |
| KCNQ1 | rs120074180 | chr11:2,466,221-2,870,340 | AX-90069280  |
| KCNQ1 | ---         | chr11:2,466,221-2,870,340 | AX-90058717  |
| KCNQ1 | rs199472728 | chr11:2,466,221-2,870,340 | AX-86553315  |
| KCNQ1 | ---         | chr11:2,466,221-2,870,340 | AX-90078041  |
| KCNQ1 | ---         | chr11:2,466,221-2,870,340 | AX-90060190  |
| KCNQ1 | ---         | chr11:2,466,221-2,870,340 | AX-90071870  |
| KCNQ1 | ---         | chr11:2,466,221-2,870,340 | AX-90063284  |
| KCNQ1 | ---         | chr11:2,466,221-2,870,340 | AX-90034345  |
| KCNQ1 | ---         | chr11:2,466,221-2,870,340 | AX-90065983  |
| KCNQ1 | ---         | chr11:2,466,221-2,870,340 | AX-90032613  |
| KCNQ1 | ---         | chr11:2,466,221-2,870,340 | AX-90027347  |
| KCNQ1 | ---         | chr11:2,466,221-2,870,340 | AX-90032458  |
| KCNQ1 | ---         | chr11:2,466,221-2,870,340 | AX-90058297  |
| KCNQ1 | ---         | chr11:2,466,221-2,870,340 | AX-90072722  |
| KCNQ1 | ---         | chr11:2,466,221-2,870,340 | AX-90059828  |
| KCNQ1 | rs199473464 | chr11:2,466,221-2,870,340 | AX-90059342  |
| KCNQ1 | rs199472736 | chr11:2,466,221-2,870,340 | AX-90066122  |
| KCNQ1 | rs199472737 | chr11:2,466,221-2,870,340 | AX-86678907  |
| KCNQ1 | ---         | chr11:2,466,221-2,870,340 | AX-90032143  |
| KCNQ1 | ---         | chr11:2,466,221-2,870,340 | AX-90027829  |
| KCNQ1 | ---         | chr11:2,466,221-2,870,340 | AX-90036038  |
| KCNQ1 | ---         | chr11:2,466,221-2,870,340 | AX-90036226  |
| KCNQ1 | ---         | chr11:2,466,221-2,870,340 | AX-90040397  |
| KCNQ1 | ---         | chr11:2,466,221-2,870,340 | AX-90028921  |
| KCNQ1 | ---         | chr11:2,466,221-2,870,340 | AX-90066174  |
| KCNQ1 | ---         | chr11:2,466,221-2,870,340 | AX-90064227  |
| KCNQ1 | ---         | chr11:2,466,221-2,870,340 | AX-90076054  |
| KCNQ1 | rs120074195 | chr11:2,466,221-2,870,340 | AX-90069290  |
| KCNQ1 | rs397508131 | chr11:2,466,221-2,870,340 | AX-90062035  |
| KCNQ1 | rs397508130 | chr11:2,466,221-2,870,340 | AX-90065243  |
| KCNQ1 | rs56209304  | chr11:2,466,221-2,870,340 | AX-30012303  |
| KCNQ1 | rs2283171   | chr11:2,466,221-2,870,340 | AX-39038573  |
| KCNQ1 | rs1076147   | chr11:2,466,221-2,870,340 | AX-30012341  |
| KCNQ1 | rs73404683  | chr11:2,466,221-2,870,340 | AX-30012343  |
| KCNQ1 | rs10832305  | chr11:2,466,221-2,870,340 | AX-97272169  |
| KCNQ1 | rs10832305  | chr11:2,466,221-2,870,340 | AX-97385256  |
| KCNQ1 | rs11824323  | chr11:2,466,221-2,870,340 | AX-95861383  |
| KCNQ1 | rs11824323  | chr11:2,466,221-2,870,340 | AX-96817434  |
| KCNQ1 | rs12282937  | chr11:2,466,221-2,870,340 | AX-39038623  |
| KCNQ1 | rs4930128   | chr11:2,466,221-2,870,340 | AX-39038625  |
| KCNQ1 | rs61871514  | chr11:2,466,221-2,870,340 | AX-30012447  |
| KCNQ1 | rs11023355  | chr11:2,466,221-2,870,340 | AX-30012473  |
| KCNQ1 | rs75392110  | chr11:2,466,221-2,870,340 | AX-30012487  |
| KCNQ1 | rs2283172   | chr11:2,466,221-2,870,340 | AX-75174842  |
| KCNQ1 | rs2283172   | chr11:2,466,221-2,870,340 | AX-96564696  |
| KCNQ1 | rs73404690  | chr11:2,466,221-2,870,340 | AX-30012561  |
| KCNQ1 | rs7932175   | chr11:2,466,221-2,870,340 | AX-96563007  |
| KCNQ1 | rs7932175   | chr11:2,466,221-2,870,340 | AX-96646576  |
| KCNQ1 | rs59171663  | chr11:2,466,221-2,870,340 | AX-96903234  |
| KCNQ1 | rs56320672  | chr11:2,466,221-2,870,340 | AX-156279820 |
| KCNQ1 | rs61871515  | chr11:2,466,221-2,870,340 | AX-30012609  |
| KCNQ1 | rs61426093  | chr11:2,466,221-2,870,340 | AX-96831751  |

|       |             |                           |              |
|-------|-------------|---------------------------|--------------|
| KCNQ1 | rs61426093  | chr11:2,466,221-2,870,340 | AX-97300114  |
| KCNQ1 | rs61871516  | chr11:2,466,221-2,870,340 | AX-96796711  |
| KCNQ1 | rs61871516  | chr11:2,466,221-2,870,340 | AX-97327899  |
| KCNQ1 | rs2283173   | chr11:2,466,221-2,870,340 | AX-96560450  |
| KCNQ1 | rs2283174   | chr11:2,466,221-2,870,340 | AX-96561819  |
| KCNQ1 | rs61871517  | chr11:2,466,221-2,870,340 | AX-30012669  |
| KCNQ1 | rs2012323   | chr11:2,466,221-2,870,340 | AX-39038765  |
| KCNQ1 | rs397508133 | chr11:2,466,221-2,870,340 | AX-90030467  |
| KCNQ1 | rs387906290 | chr11:2,466,221-2,870,340 | AX-90034549  |
| KCNQ1 | ---         | chr11:2,466,221-2,870,340 | AX-90031571  |
| KCNQ1 | ---         | chr11:2,466,221-2,870,340 | AX-90063091  |
| KCNQ1 | ---         | chr11:2,466,221-2,870,340 | AX-90057018  |
| KCNQ1 | ---         | chr11:2,466,221-2,870,340 | AX-90060041  |
| KCNQ1 | ---         | chr11:2,466,221-2,870,340 | AX-90058093  |
| KCNQ1 | rs120074182 | chr11:2,466,221-2,870,340 | AX-90069281  |
| KCNQ1 | ---         | chr11:2,466,221-2,870,340 | AX-90065091  |
| KCNQ1 | ---         | chr11:2,466,221-2,870,340 | AX-90055805  |
| KCNQ1 | ---         | chr11:2,466,221-2,870,340 | AX-90064179  |
| KCNQ1 | ---         | chr11:2,466,221-2,870,340 | AX-90032110  |
| KCNQ1 | ---         | chr11:2,466,221-2,870,340 | AX-90034064  |
| KCNQ1 | ---         | chr11:2,466,221-2,870,340 | AX-90032865  |
| KCNQ1 | ---         | chr11:2,466,221-2,870,340 | AX-90059355  |
| KCNQ1 | ---         | chr11:2,466,221-2,870,340 | AX-90033467  |
| KCNQ1 | ---         | chr11:2,466,221-2,870,340 | AX-90059957  |
| KCNQ1 | ---         | chr11:2,466,221-2,870,340 | AX-90056242  |
| KCNQ1 | ---         | chr11:2,466,221-2,870,340 | AX-90033313  |
| KCNQ1 | ---         | chr11:2,466,221-2,870,340 | AX-90058765  |
| KCNQ1 | ---         | chr11:2,466,221-2,870,340 | AX-90031589  |
| KCNQ1 | ---         | chr11:2,466,221-2,870,340 | AX-90056591  |
| KCNQ1 | ---         | chr11:2,466,221-2,870,340 | AX-90060171  |
| KCNQ1 | ---         | chr11:2,466,221-2,870,340 | AX-90027384  |
| KCNQ1 | ---         | chr11:2,466,221-2,870,340 | AX-90043786  |
| KCNQ1 | ---         | chr11:2,466,221-2,870,340 | AX-90073197  |
| KCNQ1 | ---         | chr11:2,466,221-2,870,340 | AX-90058105  |
| KCNQ1 | ---         | chr11:2,466,221-2,870,340 | AX-90056960  |
| KCNQ1 | rs397508069 | chr11:2,466,221-2,870,340 | AX-90043602  |
| KCNQ1 | ---         | chr11:2,466,221-2,870,340 | AX-90055806  |
| KCNQ1 | ---         | chr11:2,466,221-2,870,340 | AX-90063304  |
| KCNQ1 | ---         | chr11:2,466,221-2,870,340 | AX-90033477  |
| KCNQ1 | ---         | chr11:2,466,221-2,870,340 | AX-90029343  |
| KCNQ1 | ---         | chr11:2,466,221-2,870,340 | AX-90027730  |
| KCNQ1 | ---         | chr11:2,466,221-2,870,340 | AX-90064380  |
| KCNQ1 | ---         | chr11:2,466,221-2,870,340 | AX-90028289  |
| KCNQ1 | ---         | chr11:2,466,221-2,870,340 | AX-90027684  |
| KCNQ1 | ---         | chr11:2,466,221-2,870,340 | AX-90056546  |
| KCNQ1 | ---         | chr11:2,466,221-2,870,340 | AX-90060626  |
| KCNQ1 | ---         | chr11:2,466,221-2,870,340 | AX-90060738  |
| KCNQ1 | rs199876246 | chr11:2,466,221-2,870,340 | AX-151350651 |
| KCNQ1 | rs56750705  | chr11:2,466,221-2,870,340 | AX-97476613  |
| KCNQ1 | ---         | chr11:2,466,221-2,870,340 | AX-39038791  |
| KCNQ1 | ---         | chr11:2,466,221-2,870,340 | AX-90056001  |
| KCNQ1 | rs120074183 | chr11:2,466,221-2,870,340 | AX-90069282  |
| KCNQ1 | ---         | chr11:2,466,221-2,870,340 | AX-90030281  |
| KCNQ1 | ---         | chr11:2,466,221-2,870,340 | AX-90028919  |
| KCNQ1 | ---         | chr11:2,466,221-2,870,340 | AX-90064580  |

|       |             |                           |             |
|-------|-------------|---------------------------|-------------|
| KCNQ1 | ---         | chr11:2,466,221-2,870,340 | AX-90030563 |
| KCNQ1 | ---         | chr11:2,466,221-2,870,340 | AX-90032432 |
| KCNQ1 | ---         | chr11:2,466,221-2,870,340 | AX-90029608 |
| KCNQ1 | ---         | chr11:2,466,221-2,870,340 | AX-90030915 |
| KCNQ1 | ---         | chr11:2,466,221-2,870,340 | AX-90036263 |
| KCNQ1 | ---         | chr11:2,466,221-2,870,340 | AX-90073150 |
| KCNQ1 | ---         | chr11:2,466,221-2,870,340 | AX-90033459 |
| KCNQ1 | rs397508075 | chr11:2,466,221-2,870,340 | AX-90034324 |
| KCNQ1 | ---         | chr11:2,466,221-2,870,340 | AX-90031628 |
| KCNQ1 | ---         | chr11:2,466,221-2,870,340 | AX-90062426 |
| KCNQ1 | rs12720458  | chr11:2,466,221-2,870,340 | AX-90038259 |
| KCNQ1 | ---         | chr11:2,466,221-2,870,340 | AX-90059564 |
| KCNQ1 | ---         | chr11:2,466,221-2,870,340 | AX-90059337 |
| KCNQ1 | ---         | chr11:2,466,221-2,870,340 | AX-90035646 |
| KCNQ1 | ---         | chr11:2,466,221-2,870,340 | AX-90031994 |
| KCNQ1 | ---         | chr11:2,466,221-2,870,340 | AX-90034033 |
| KCNQ1 | ---         | chr11:2,466,221-2,870,340 | AX-90059210 |
| KCNQ1 | ---         | chr11:2,466,221-2,870,340 | AX-90060433 |
| KCNQ1 | ---         | chr11:2,466,221-2,870,340 | AX-90063249 |
| KCNQ1 | ---         | chr11:2,466,221-2,870,340 | AX-90031328 |
| KCNQ1 | ---         | chr11:2,466,221-2,870,340 | AX-90030080 |
| KCNQ1 | ---         | chr11:2,466,221-2,870,340 | AX-90073425 |
| KCNQ1 | rs397508078 | chr11:2,466,221-2,870,340 | AX-90027967 |
| KCNQ1 | ---         | chr11:2,466,221-2,870,340 | AX-90040340 |
| KCNQ1 | rs56413900  | chr11:2,466,221-2,870,340 | AX-30012837 |
| KCNQ1 | rs56859078  | chr11:2,466,221-2,870,340 | AX-96886752 |
| KCNQ1 | rs56859078  | chr11:2,466,221-2,870,340 | AX-97357452 |
| KCNQ1 | rs756851    | chr11:2,466,221-2,870,340 | AX-96645469 |
| KCNQ1 | rs12808620  | chr11:2,466,221-2,870,340 | AX-96560769 |
| KCNQ1 | ---         | chr11:2,466,221-2,870,340 | AX-90056717 |
| KCNQ1 | ---         | chr11:2,466,221-2,870,340 | AX-90063846 |
| KCNQ1 | ---         | chr11:2,466,221-2,870,340 | AX-90074656 |
| KCNQ1 | ---         | chr11:2,466,221-2,870,340 | AX-90031139 |
| KCNQ1 | ---         | chr11:2,466,221-2,870,340 | AX-90075418 |
| KCNQ1 | ---         | chr11:2,466,221-2,870,340 | AX-90065684 |
| KCNQ1 | ---         | chr11:2,466,221-2,870,340 | AX-90062263 |
| KCNQ1 | ---         | chr11:2,466,221-2,870,340 | AX-90029227 |
| KCNQ1 | ---         | chr11:2,466,221-2,870,340 | AX-90065657 |
| KCNQ1 | ---         | chr11:2,466,221-2,870,340 | AX-90065329 |
| KCNQ1 | ---         | chr11:2,466,221-2,870,340 | AX-90066245 |
| KCNQ1 | ---         | chr11:2,466,221-2,870,340 | AX-90049319 |
| KCNQ1 | rs199472776 | chr11:2,466,221-2,870,340 | AX-83450931 |
| KCNQ1 | ---         | chr11:2,466,221-2,870,340 | AX-90062050 |
| KCNQ1 | ---         | chr11:2,466,221-2,870,340 | AX-90072360 |
| KCNQ1 | rs73404698  | chr11:2,466,221-2,870,340 | AX-30012977 |
| KCNQ1 | rs112193996 | chr11:2,466,221-2,870,340 | AX-30012997 |
| KCNQ1 | rs11828659  | chr11:2,466,221-2,870,340 | AX-39038901 |
| KCNQ1 | rs7946404   | chr11:2,466,221-2,870,340 | AX-97434433 |
| KCNQ1 | rs59161111  | chr11:2,466,221-2,870,340 | AX-30013003 |
| KCNQ1 | ---         | chr11:2,466,221-2,870,340 | AX-90057278 |
| KCNQ1 | ---         | chr11:2,466,221-2,870,340 | AX-90042660 |
| KCNQ1 | ---         | chr11:2,466,221-2,870,340 | AX-90035146 |
| KCNQ1 | ---         | chr11:2,466,221-2,870,340 | AX-90074661 |
| KCNQ1 | ---         | chr11:2,466,221-2,870,340 | AX-90064095 |
| KCNQ1 | ---         | chr11:2,466,221-2,870,340 | AX-90072232 |

|       |             |                           |              |
|-------|-------------|---------------------------|--------------|
| KCNQ1 | ---         | chr11:2,466,221-2,870,340 | AX-90055899  |
| KCNQ1 | rs140452381 | chr11:2,466,221-2,870,340 | AX-86687312  |
| KCNQ1 | ---         | chr11:2,466,221-2,870,340 | AX-90064921  |
| KCNQ1 | rs199472783 | chr11:2,466,221-2,870,340 | AX-86555070  |
| KCNQ1 | rs10766203  | chr11:2,466,221-2,870,340 | AX-39038909  |
| KCNQ1 | rs12804487  | chr11:2,466,221-2,870,340 | AX-96560722  |
| KCNQ1 | rs12804487  | chr11:2,466,221-2,870,340 | AX-96644291  |
| KCNQ1 | rs36008556  | chr11:2,466,221-2,870,340 | AX-96752583  |
| KCNQ1 | rs35421868  | chr11:2,466,221-2,870,340 | AX-113407398 |
| KCNQ1 | rs35421868  | chr11:2,466,221-2,870,340 | AX-113963898 |
| KCNQ1 | rs112180245 | chr11:2,466,221-2,870,340 | AX-30013067  |
| KCNQ1 | rs73413288  | chr11:2,466,221-2,870,340 | AX-30013095  |
| KCNQ1 | rs1024381   | chr11:2,466,221-2,870,340 | AX-97422233  |
| KCNQ1 | rs2283175   | chr11:2,466,221-2,870,340 | AX-39038947  |
| KCNQ1 | rs2283177   | chr11:2,466,221-2,870,340 | AX-30013125  |
| KCNQ1 | rs75863300  | chr11:2,466,221-2,870,340 | AX-96797621  |
| KCNQ1 | rs75863300  | chr11:2,466,221-2,870,340 | AX-96830117  |
| KCNQ1 | rs2283178   | chr11:2,466,221-2,870,340 | AX-30013147  |
| KCNQ1 | rs74049370  | chr11:2,466,221-2,870,340 | AX-156279821 |
| KCNQ1 | rs74049370  | chr11:2,466,221-2,870,340 | AX-156295409 |
| KCNQ1 | rs7933215   | chr11:2,466,221-2,870,340 | AX-156279822 |
| KCNQ1 | rs7933215   | chr11:2,466,221-2,870,340 | AX-156295410 |
| KCNQ1 | rs2283179   | chr11:2,466,221-2,870,340 | AX-39038955  |
| KCNQ1 | rs2299618   | chr11:2,466,221-2,870,340 | AX-30013243  |
| KCNQ1 | rs2157760   | chr11:2,466,221-2,870,340 | AX-39038993  |
| KCNQ1 | rs77625359  | chr11:2,466,221-2,870,340 | AX-30013355  |
| KCNQ1 | rs2188194   | chr11:2,466,221-2,870,340 | AX-30013367  |
| KCNQ1 | ---         | chr11:2,466,221-2,870,340 | AX-16569961  |
| KCNQ1 | rs3032764   | chr11:2,466,221-2,870,340 | AX-97407567  |
| KCNQ1 | rs1116714   | chr11:2,466,221-2,870,340 | AX-11148435  |
| KCNQ1 | rs7936654   | chr11:2,466,221-2,870,340 | AX-16569979  |
| KCNQ1 | rs1116715   | chr11:2,466,221-2,870,340 | AX-96819365  |
| KCNQ1 | rs1116715   | chr11:2,466,221-2,870,340 | AX-97261312  |
| KCNQ1 | rs4930129   | chr11:2,466,221-2,870,340 | AX-112925554 |
| KCNQ1 | rs4930129   | chr11:2,466,221-2,870,340 | AX-112999622 |
| KCNQ1 | rs4930130   | chr11:2,466,221-2,870,340 | AX-96945448  |
| KCNQ1 | rs4930130   | chr11:2,466,221-2,870,340 | AX-97442442  |
| KCNQ1 | rs4930131   | chr11:2,466,221-2,870,340 | AX-16570045  |
| KCNQ1 | rs12277672  | chr11:2,466,221-2,870,340 | AX-16570052  |
| KCNQ1 | rs12279024  | chr11:2,466,221-2,870,340 | AX-11198877  |
| KCNQ1 | rs11822631  | chr11:2,466,221-2,870,340 | AX-12420364  |
| KCNQ1 | rs2188195   | chr11:2,466,221-2,870,340 | AX-39039127  |
| KCNQ1 | rs10832352  | chr11:2,466,221-2,870,340 | AX-113400621 |
| KCNQ1 | rs10832352  | chr11:2,466,221-2,870,340 | AX-113474479 |
| KCNQ1 | rs11023421  | chr11:2,466,221-2,870,340 | AX-16570092  |
| KCNQ1 | rs7934636   | chr11:2,466,221-2,870,340 | AX-113891033 |
| KCNQ1 | rs11023425  | chr11:2,466,221-2,870,340 | AX-30013617  |
| KCNQ1 | rs11023427  | chr11:2,466,221-2,870,340 | AX-16570110  |
| KCNQ1 | rs7944932   | chr11:2,466,221-2,870,340 | AX-30013629  |
| KCNQ1 | rs7947990   | chr11:2,466,221-2,870,340 | AX-96879166  |
| KCNQ1 | rs7947990   | chr11:2,466,221-2,870,340 | AX-97290314  |
| KCNQ1 | rs4929999   | chr11:2,466,221-2,870,340 | AX-16570132  |
| KCNQ1 | rs4930000   | chr11:2,466,221-2,870,340 | AX-12586273  |
| KCNQ1 | rs76698782  | chr11:2,466,221-2,870,340 | AX-16570139  |
| KCNQ1 | rs7121454   | chr11:2,466,221-2,870,340 | AX-96833040  |

|       |             |                           |              |
|-------|-------------|---------------------------|--------------|
| KCNQ1 | rs7121454   | chr11:2,466,221-2,870,340 | AX-96864817  |
| KCNQ1 | rs7104842   | chr11:2,466,221-2,870,340 | AX-30013739  |
| KCNQ1 | rs114404527 | chr11:2,466,221-2,870,340 | AX-96847088  |
| KCNQ1 | rs114404527 | chr11:2,466,221-2,870,340 | AX-97266296  |
| KCNQ1 | rs12797641  | chr11:2,466,221-2,870,340 | AX-148165073 |
| KCNQ1 | rs12797641  | chr11:2,466,221-2,870,340 | AX-156270467 |
| KCNQ1 | rs12799862  | chr11:2,466,221-2,870,340 | AX-105142913 |
| KCNQ1 | rs11023433  | chr11:2,466,221-2,870,340 | AX-156270468 |
| KCNQ1 | rs11023433  | chr11:2,466,221-2,870,340 | AX-92393588  |
| KCNQ1 | rs143548626 | chr11:2,466,221-2,870,340 | AX-144905831 |
| KCNQ1 | rs143548626 | chr11:2,466,221-2,870,340 | AX-144927827 |
| KCNQ1 | rs61871520  | chr11:2,466,221-2,870,340 | AX-96945314  |
| KCNQ1 | rs61871520  | chr11:2,466,221-2,870,340 | AX-96955854  |
| KCNQ1 | rs11529572  | chr11:2,466,221-2,870,340 | AX-148191045 |
| KCNQ1 | rs11529572  | chr11:2,466,221-2,870,340 | AX-156283274 |
| KCNQ1 | rs7947972   | chr11:2,466,221-2,870,340 | AX-96906174  |
| KCNQ1 | rs7947972   | chr11:2,466,221-2,870,340 | AX-97273599  |
| KCNQ1 | rs7947981   | chr11:2,466,221-2,870,340 | AX-96740403  |
| KCNQ1 | rs7947981   | chr11:2,466,221-2,870,340 | AX-96746960  |
| KCNQ1 | rs58827264  | chr11:2,466,221-2,870,340 | AX-156270469 |
| KCNQ1 | rs58827264  | chr11:2,466,221-2,870,340 | AX-156289284 |
| KCNQ1 | rs7130232   | chr11:2,466,221-2,870,340 | AX-39039293  |
| KCNQ1 | rs75431610  | chr11:2,466,221-2,870,340 | AX-16570259  |
| KCNQ1 | rs9667198   | chr11:2,466,221-2,870,340 | AX-30013853  |
| KCNQ1 | rs111331313 | chr11:2,466,221-2,870,340 | AX-96826894  |
| KCNQ1 | rs111331313 | chr11:2,466,221-2,870,340 | AX-97447318  |
| KCNQ1 | rs11023451  | chr11:2,466,221-2,870,340 | AX-88780469  |
| KCNQ1 | rs7108478   | chr11:2,466,221-2,870,340 | AX-12620934  |
| KCNQ1 | rs73415327  | chr11:2,466,221-2,870,340 | AX-156270470 |
| KCNQ1 | rs73415327  | chr11:2,466,221-2,870,340 | AX-156289285 |
| KCNQ1 | rs73415330  | chr11:2,466,221-2,870,340 | AX-123055617 |
| KCNQ1 | rs73415330  | chr11:2,466,221-2,870,340 | AX-123055618 |
| KCNQ1 | rs7104624   | chr11:2,466,221-2,870,340 | AX-12620810  |
| KCNQ1 | rs4930137   | chr11:2,466,221-2,870,340 | AX-16570329  |
| KCNQ1 | rs4930138   | chr11:2,466,221-2,870,340 | AX-16570342  |
| KCNQ1 | rs4930139   | chr11:2,466,221-2,870,340 | AX-11536730  |
| KCNQ1 | rs117893171 | chr11:2,466,221-2,870,340 | AX-16570371  |
| KCNQ1 | rs1965606   | chr11:2,466,221-2,870,340 | AX-123022913 |
| KCNQ1 | rs1965606   | chr11:2,466,221-2,870,340 | AX-123022914 |
| KCNQ1 | rs10766212  | chr11:2,466,221-2,870,340 | AX-11120065  |
| KCNQ1 | rs7943271   | chr11:2,466,221-2,870,340 | AX-96775494  |
| KCNQ1 | rs7943271   | chr11:2,466,221-2,870,340 | AX-97473695  |
| KCNQ1 | rs7942590   | chr11:2,466,221-2,870,340 | AX-12645351  |
| KCNQ1 | rs7943802   | chr11:2,466,221-2,870,340 | AX-30014125  |
| KCNQ1 | rs80102379  | chr11:2,466,221-2,870,340 | AX-16570452  |
| KCNQ1 | rs2106467   | chr11:2,466,221-2,870,340 | AX-16570510  |
| KCNQ1 | rs55724397  | chr11:2,466,221-2,870,340 | AX-16570533  |
| KCNQ1 | rs2106466   | chr11:2,466,221-2,870,340 | AX-113883372 |
| KCNQ1 | rs2106465   | chr11:2,466,221-2,870,340 | AX-16570555  |
| KCNQ1 | rs10766217  | chr11:2,466,221-2,870,340 | AX-123046838 |
| KCNQ1 | rs10766218  | chr11:2,466,221-2,870,340 | AX-16570583  |
| KCNQ1 | rs2106464   | chr11:2,466,221-2,870,340 | AX-123022921 |
| KCNQ1 | rs2106464   | chr11:2,466,221-2,870,340 | AX-123022922 |
| KCNQ1 | rs2106463   | chr11:2,466,221-2,870,340 | AX-123050150 |
| KCNQ1 | rs2106463   | chr11:2,466,221-2,870,340 | AX-123050151 |

|       |             |                           |              |
|-------|-------------|---------------------------|--------------|
| KCNQ1 | rs11023485  | chr11:2,466,221-2,870,340 | AX-11138588  |
| KCNQ1 | rs4930141   | chr11:2,466,221-2,870,340 | AX-30014369  |
| KCNQ1 | rs7944966   | chr11:2,466,221-2,870,340 | AX-96562464  |
| KCNQ1 | rs77402029  | chr11:2,466,221-2,870,340 | AX-96729340  |
| KCNQ1 | rs77402029  | chr11:2,466,221-2,870,340 | AX-96757637  |
| KCNQ1 | rs7945093   | chr11:2,466,221-2,870,340 | AX-11655310  |
| KCNQ1 | rs7929804   | chr11:2,466,221-2,870,340 | AX-39039711  |
| KCNQ1 | rs2412058   | chr11:2,466,221-2,870,340 | AX-11390411  |
| KCNQ1 | rs78583424  | chr11:2,466,221-2,870,340 | AX-96803993  |
| KCNQ1 | rs78583424  | chr11:2,466,221-2,870,340 | AX-96823482  |
| KCNQ1 | ---         | chr11:2,466,221-2,870,340 | AX-151178419 |
| KCNQ1 | ---         | chr11:2,466,221-2,870,340 | AX-156284962 |
| KCNQ1 | rs2412057   | chr11:2,466,221-2,870,340 | AX-96564665  |
| KCNQ1 | rs2412057   | chr11:2,466,221-2,870,340 | AX-96648234  |
| KCNQ1 | rs11023499  | chr11:2,466,221-2,870,340 | AX-96564922  |
| KCNQ1 | rs11023499  | chr11:2,466,221-2,870,340 | AX-96648491  |
| KCNQ1 | rs201092224 | chr11:2,466,221-2,870,340 | AX-96975337  |
| KCNQ1 | rs201092224 | chr11:2,466,221-2,870,340 | AX-96994766  |
| KCNQ1 | rs73415358  | chr11:2,466,221-2,870,340 | AX-96912126  |
| KCNQ1 | rs73415358  | chr11:2,466,221-2,870,340 | AX-97262854  |
| KCNQ1 | rs7128307   | chr11:2,466,221-2,870,340 | AX-96910336  |
| KCNQ1 | rs7128307   | chr11:2,466,221-2,870,340 | AX-96921310  |
| KCNQ1 | rs11529573  | chr11:2,466,221-2,870,340 | AX-96560375  |
| KCNQ1 | rs11529573  | chr11:2,466,221-2,870,340 | AX-96643944  |
| KCNQ1 | rs7937711   | chr11:2,466,221-2,870,340 | AX-39039821  |
| KCNQ1 | rs2157899   | chr11:2,466,221-2,870,340 | AX-96879482  |
| KCNQ1 | rs2157899   | chr11:2,466,221-2,870,340 | AX-97290663  |
| KCNQ1 | rs11493163  | chr11:2,466,221-2,870,340 | AX-30014573  |
| KCNQ1 | rs141101139 | chr11:2,466,221-2,870,340 | AX-96842090  |
| KCNQ1 | rs141101139 | chr11:2,466,221-2,870,340 | AX-96852756  |
| KCNQ1 | rs7939222   | chr11:2,466,221-2,870,340 | AX-30014583  |
| KCNQ1 | rs10741669  | chr11:2,466,221-2,870,340 | AX-12394249  |
| KCNQ1 | rs73415376  | chr11:2,466,221-2,870,340 | AX-16570785  |
| KCNQ1 | rs10734233  | chr11:2,466,221-2,870,340 | AX-16570791  |
| KCNQ1 | rs10766228  | chr11:2,466,221-2,870,340 | AX-113891032 |
| KCNQ1 | rs72850242  | chr11:2,466,221-2,870,340 | AX-16570797  |
| KCNQ1 | rs73415381  | chr11:2,466,221-2,870,340 | AX-16570867  |
| KCNQ1 | rs7129523   | chr11:2,466,221-2,870,340 | AX-97364649  |
| KCNQ1 | rs7129523   | chr11:2,466,221-2,870,340 | AX-97478897  |
| KCNQ1 | rs7943674   | chr11:2,466,221-2,870,340 | AX-113416158 |
| KCNQ1 | rs7943674   | chr11:2,466,221-2,870,340 | AX-113490252 |
| KCNQ1 | rs7118939   | chr11:2,466,221-2,870,340 | AX-113896575 |
| KCNQ1 | rs7103309   | chr11:2,466,221-2,870,340 | AX-113021917 |
| KCNQ1 | rs7103309   | chr11:2,466,221-2,870,340 | AX-113913149 |
| KCNQ1 | rs144940002 | chr11:2,466,221-2,870,340 | AX-156298503 |
| KCNQ1 | rs144940002 | chr11:2,466,221-2,870,340 | AX-16570902  |
| KCNQ1 | rs12575958  | chr11:2,466,221-2,870,340 | AX-11215712  |
| KCNQ1 | rs2412056   | chr11:2,466,221-2,870,340 | AX-112933308 |
| KCNQ1 | rs2412056   | chr11:2,466,221-2,870,340 | AX-113490081 |
| KCNQ1 | rs57775947  | chr11:2,466,221-2,870,340 | AX-156284589 |
| KCNQ1 | rs10741670  | chr11:2,466,221-2,870,340 | AX-113007162 |
| KCNQ1 | rs10832405  | chr11:2,466,221-2,870,340 | AX-113891034 |
| KCNQ1 | rs10832405  | chr11:2,466,221-2,870,340 | AX-113964896 |
| KCNQ1 | rs12365197  | chr11:2,466,221-2,870,340 | AX-30014879  |
| KCNQ1 | rs11023535  | chr11:2,466,221-2,870,340 | AX-30014881  |



|       |             |                           |              |
|-------|-------------|---------------------------|--------------|
| KCNQ1 | rs11023536  | chr11:2,466,221-2,870,340 | AX-30014887  |
| KCNQ1 | rs10766236  | chr11:2,466,221-2,870,340 | AX-30014969  |
| KCNQ1 | rs11023540  | chr11:2,466,221-2,870,340 | AX-123022931 |
| KCNQ1 | rs11023540  | chr11:2,466,221-2,870,340 | AX-123022932 |
| KCNQ1 | rs10430888  | chr11:2,466,221-2,870,340 | AX-16571029  |
| KCNQ1 | rs4271371   | chr11:2,466,221-2,870,340 | AX-113414786 |
| KCNQ1 | rs4271371   | chr11:2,466,221-2,870,340 | AX-113971232 |
| KCNQ1 | rs10430889  | chr11:2,466,221-2,870,340 | AX-156295411 |
| KCNQ1 | rs10766242  | chr11:2,466,221-2,870,340 | AX-123049780 |
| KCNQ1 | rs35469749  | chr11:2,466,221-2,870,340 | AX-30015105  |
| KCNQ1 | rs141868481 | chr11:2,466,221-2,870,340 | AX-96797959  |
| KCNQ1 | rs10832430  | chr11:2,466,221-2,870,340 | AX-11125433  |
| KCNQ1 | rs201811937 | chr11:2,466,221-2,870,340 | AX-97486665  |
| KCNQ1 | rs9667408   | chr11:2,466,221-2,870,340 | AX-96914134  |
| KCNQ1 | rs9667408   | chr11:2,466,221-2,870,340 | AX-96920725  |
| KCNQ1 | rs144791799 | chr11:2,466,221-2,870,340 | AX-148764606 |
| KCNQ1 | rs144791799 | chr11:2,466,221-2,870,340 | AX-96737434  |
| KCNQ1 | rs7102138   | chr11:2,466,221-2,870,340 | AX-96854864  |
| KCNQ1 | rs7102138   | chr11:2,466,221-2,870,340 | AX-97290641  |
| KCNQ1 | rs11023582  | chr11:2,466,221-2,870,340 | AX-105149108 |
| KCNQ1 | rs11023582  | chr11:2,466,221-2,870,340 | AX-96783719  |
| KCNQ1 | rs116374321 | chr11:2,466,221-2,870,340 | AX-96934306  |
| KCNQ1 | rs116374321 | chr11:2,466,221-2,870,340 | AX-96966275  |
| KCNQ1 | rs115614041 | chr11:2,466,221-2,870,340 | AX-144888935 |
| KCNQ1 | rs115614041 | chr11:2,466,221-2,870,340 | AX-144909228 |
| KCNQ1 | rs7936778   | chr11:2,466,221-2,870,340 | AX-113480494 |
| KCNQ1 | rs7936778   | chr11:2,466,221-2,870,340 | AX-113595452 |
| KCNQ1 | rs11023583  | chr11:2,466,221-2,870,340 | AX-105105895 |
| KCNQ1 | rs11023583  | chr11:2,466,221-2,870,340 | AX-112995156 |
| KCNQ1 | rs1119488   | chr11:2,466,221-2,870,340 | AX-16571401  |
| KCNQ1 | rs756852    | chr11:2,466,221-2,870,340 | AX-96563613  |
| KCNQ1 | rs76483719  | chr11:2,466,221-2,870,340 | AX-54513750  |
| KCNQ1 | rs74501871  | chr11:2,466,221-2,870,340 | AX-16571481  |
| KCNQ1 | rs7124833   | chr11:2,466,221-2,870,340 | AX-30015603  |
| KCNQ1 | rs7108035   | chr11:2,466,221-2,870,340 | AX-16571490  |
| KCNQ1 | rs2412055   | chr11:2,466,221-2,870,340 | AX-112991952 |
| KCNQ1 | rs2412055   | chr11:2,466,221-2,870,340 | AX-113400622 |
| KCNQ1 | rs11824124  | chr11:2,466,221-2,870,340 | AX-30015739  |
| KCNQ1 | rs202108554 | chr11:2,466,221-2,870,340 | AX-96822933  |
| KCNQ1 | rs202108554 | chr11:2,466,221-2,870,340 | AX-97469739  |
| KCNQ1 | rs463337    | chr11:2,466,221-2,870,340 | AX-30015897  |
| KCNQ1 | rs466597    | chr11:2,466,221-2,870,340 | AX-11516313  |
| KCNQ1 | rs170762    | chr11:2,466,221-2,870,340 | AX-30015949  |
| KCNQ1 | rs34514246  | chr11:2,466,221-2,870,340 | AX-16571691  |
| KCNQ1 | rs12422173  | chr11:2,466,221-2,870,340 | AX-11204893  |
| KCNQ1 | rs231349    | chr11:2,466,221-2,870,340 | AX-12525681  |
| KCNQ1 | rs6578283   | chr11:2,466,221-2,870,340 | AX-11573324  |
| KCNQ1 | rs231348    | chr11:2,466,221-2,870,340 | AX-39040657  |
| KCNQ1 | rs231347    | chr11:2,466,221-2,870,340 | AX-39040677  |
| KCNQ1 | rs231346    | chr11:2,466,221-2,870,340 | AX-30016051  |
| KCNQ1 | rs231345    | chr11:2,466,221-2,870,340 | AX-30016055  |
| KCNQ1 | rs231344    | chr11:2,466,221-2,870,340 | AX-11384371  |
| KCNQ1 | rs150171639 | chr11:2,466,221-2,870,340 | AX-151356191 |
| KCNQ1 | rs150171639 | chr11:2,466,221-2,870,340 | AX-156298579 |
| KCNQ1 | rs76888915  | chr11:2,466,221-2,870,340 | AX-30016101  |

|       |             |                           |             |
|-------|-------------|---------------------------|-------------|
| KCNQ1 | rs231343    | chr11:2,466,221-2,870,340 | AX-39040771 |
| KCNQ1 | rs57308681  | chr11:2,466,221-2,870,340 | AX-30016109 |
| KCNQ1 | rs231342    | chr11:2,466,221-2,870,340 | AX-30016117 |
| KCNQ1 | rs231341    | chr11:2,466,221-2,870,340 | AX-30016127 |
| KCNQ1 | rs189137    | chr11:2,466,221-2,870,340 | AX-50051364 |
| KCNQ1 | rs35237966  | chr11:2,466,221-2,870,340 | AX-96563795 |
| KCNQ1 | rs35237966  | chr11:2,466,221-2,870,340 | AX-96647364 |
| KCNQ1 | rs151216    | chr11:2,466,221-2,870,340 | AX-96971226 |
| KCNQ1 | rs151216    | chr11:2,466,221-2,870,340 | AX-97408781 |
| KCNQ1 | rs79245945  | chr11:2,466,221-2,870,340 | AX-96827073 |
| KCNQ1 | rs151215    | chr11:2,466,221-2,870,340 | AX-96645723 |
| KCNQ1 | rs12573965  | chr11:2,466,221-2,870,340 | AX-30016231 |
| KCNQ1 | rs11820621  | chr11:2,466,221-2,870,340 | AX-39040835 |
| KCNQ1 | rs231364    | chr11:2,466,221-2,870,340 | AX-39040839 |
| KCNQ1 | rs739502    | chr11:2,466,221-2,870,340 | AX-30016271 |
| KCNQ1 | rs739502    | chr11:2,466,221-2,870,340 | AX-91989312 |
| KCNQ1 | rs28730758  | chr11:2,466,221-2,870,340 | AX-39040849 |
| KCNQ1 | ---         | chr11:2,466,221-2,870,340 | AX-90061527 |
| KCNQ1 | ---         | chr11:2,466,221-2,870,340 | AX-90062389 |
| KCNQ1 | rs17215465  | chr11:2,466,221-2,870,340 | AX-39040853 |
| KCNQ1 | ---         | chr11:2,466,221-2,870,340 | AX-90072635 |
| KCNQ1 | ---         | chr11:2,466,221-2,870,340 | AX-90046047 |
| KCNQ1 | ---         | chr11:2,466,221-2,870,340 | AX-90045672 |
| KCNQ1 | rs397508091 | chr11:2,466,221-2,870,340 | AX-90056611 |
| KCNQ1 | rs397508093 | chr11:2,466,221-2,870,340 | AX-90060042 |
| KCNQ1 | rs760419    | chr11:2,466,221-2,870,340 | AX-91987526 |
| KCNQ1 | rs760419    | chr11:2,466,221-2,870,340 | AX-92012653 |
| KCNQ1 | rs2075868   | chr11:2,466,221-2,870,340 | AX-96742019 |
| KCNQ1 | rs2075868   | chr11:2,466,221-2,870,340 | AX-96748577 |
| KCNQ1 | rs743647    | chr11:2,466,221-2,870,340 | AX-30016303 |
| KCNQ1 | rs9666537   | chr11:2,466,221-2,870,340 | AX-96562522 |
| KCNQ1 | rs9666538   | chr11:2,466,221-2,870,340 | AX-96767722 |
| KCNQ1 | rs9666538   | chr11:2,466,221-2,870,340 | AX-96791425 |
| KCNQ1 | rs12271234  | chr11:2,466,221-2,870,340 | AX-30016397 |
| KCNQ1 | rs16928525  | chr11:2,466,221-2,870,340 | AX-39040955 |
| KCNQ1 | rs10832514  | chr11:2,466,221-2,870,340 | AX-39040963 |
| KCNQ1 | ---         | chr11:2,466,221-2,870,340 | AX-39040967 |
| KCNQ1 | rs12418076  | chr11:2,466,221-2,870,340 | AX-39040973 |
| KCNQ1 | rs12294861  | chr11:2,466,221-2,870,340 | AX-39040983 |
| KCNQ1 | rs1459825   | chr11:2,466,221-2,870,340 | AX-39040991 |
| KCNQ1 | rs61870801  | chr11:2,466,221-2,870,340 | AX-30016509 |
| KCNQ1 | rs151212    | chr11:2,466,221-2,870,340 | AX-16572098 |
| KCNQ1 | rs4930005   | chr11:2,466,221-2,870,340 | AX-39041001 |
| KCNQ1 | rs231362    | chr11:2,466,221-2,870,340 | AX-82894743 |
| KCNQ1 | rs231361    | chr11:2,466,221-2,870,340 | AX-39041057 |
| KCNQ1 | rs231360    | chr11:2,466,221-2,870,340 | AX-96645636 |
| KCNQ1 | rs144613775 | chr11:2,466,221-2,870,340 | AX-96561539 |
| KCNQ1 | rs61870802  | chr11:2,466,221-2,870,340 | AX-96562215 |
| KCNQ1 | rs61870802  | chr11:2,466,221-2,870,340 | AX-96645784 |
| KCNQ1 | rs35889184  | chr11:2,466,221-2,870,340 | AX-30016609 |
| KCNQ1 | ---         | chr11:2,466,221-2,870,340 | AX-96822151 |
| KCNQ1 | rs231359    | chr11:2,466,221-2,870,340 | AX-39041157 |
| KCNQ1 | rs7105073   | chr11:2,466,221-2,870,340 | AX-75178552 |
| KCNQ1 | rs7105073   | chr11:2,466,221-2,870,340 | AX-96905916 |
| KCNQ1 | rs7128926   | chr11:2,466,221-2,870,340 | AX-16572309 |

|       |             |                           |              |
|-------|-------------|---------------------------|--------------|
| KCNQ1 | rs9666604   | chr11:2,466,221-2,870,340 | AX-11699928  |
| KCNQ1 | rs16928538  | chr11:2,466,221-2,870,340 | AX-11290516  |
| KCNQ1 | rs11023738  | chr11:2,466,221-2,870,340 | AX-11138598  |
| KCNQ1 | rs72850276  | chr11:2,466,221-2,870,340 | AX-16572371  |
| KCNQ1 | rs111698879 | chr11:2,466,221-2,870,340 | AX-96563066  |
| KCNQ1 | rs111698879 | chr11:2,466,221-2,870,340 | AX-96646635  |
| KCNQ1 | rs7941377   | chr11:2,466,221-2,870,340 | AX-16572374  |
| KCNQ1 | rs231358    | chr11:2,466,221-2,870,340 | AX-39041377  |
| KCNQ1 | rs35931322  | chr11:2,466,221-2,870,340 | AX-96970021  |
| KCNQ1 | rs35931322  | chr11:2,466,221-2,870,340 | AX-97366730  |
| KCNQ1 | rs231357    | chr11:2,466,221-2,870,340 | AX-39041419  |
| KCNQ1 | rs231356    | chr11:2,466,221-2,870,340 | AX-39041431  |
| KCNQ1 | rs231355    | chr11:2,466,221-2,870,340 | AX-97318688  |
| KCNQ1 | rs231354    | chr11:2,466,221-2,870,340 | AX-39041465  |
| KCNQ1 | rs75643572  | chr11:2,466,221-2,870,340 | AX-30017263  |
| KCNQ1 | rs231353    | chr11:2,466,221-2,870,340 | AX-96562104  |
| KCNQ1 | rs11023793  | chr11:2,466,221-2,870,340 | AX-39041549  |
| KCNQ1 | rs7127825   | chr11:2,466,221-2,870,340 | AX-112994390 |
| KCNQ1 | rs7127825   | chr11:2,466,221-2,870,340 | AX-113885782 |
| KCNQ1 | ---         | chr11:2,466,221-2,870,340 | AX-39041571  |
| KCNQ1 | rs2283189   | chr11:2,466,221-2,870,340 | AX-30017417  |
| KCNQ1 | rs231351    | chr11:2,466,221-2,870,340 | AX-39041575  |
| KCNQ1 | rs2283190   | chr11:2,466,221-2,870,340 | AX-39041583  |
| KCNQ1 | rs7939976   | chr11:2,466,221-2,870,340 | AX-39041599  |
| KCNQ1 | rs146937958 | chr11:2,466,221-2,870,340 | AX-151426790 |
| KCNQ1 | rs146937958 | chr11:2,466,221-2,870,340 | AX-156284647 |
| KCNQ1 | rs231350    | chr11:2,466,221-2,870,340 | AX-30017489  |
| KCNQ1 | rs11821797  | chr11:2,466,221-2,870,340 | AX-39041631  |
| KCNQ1 | rs12275726  | chr11:2,466,221-2,870,340 | AX-39041645  |
| KCNQ1 | rs16928561  | chr11:2,466,221-2,870,340 | AX-39041673  |
| KCNQ1 | rs7927129   | chr11:2,466,221-2,870,340 | AX-39041675  |
| KCNQ1 | rs457704    | chr11:2,466,221-2,870,340 | AX-30017565  |
| KCNQ1 | rs72850281  | chr11:2,466,221-2,870,340 | AX-30017569  |
| KCNQ1 | rs11023831  | chr11:2,466,221-2,870,340 | AX-39041705  |
| KCNQ1 | rs462402    | chr11:2,466,221-2,870,340 | AX-16572890  |
| KCNQ1 | rs463924    | chr11:2,466,221-2,870,340 | AX-16572902  |
| KCNQ1 | rs2283193   | chr11:2,466,221-2,870,340 | AX-30017599  |
| KCNQ1 | rs74472063  | chr11:2,466,221-2,870,340 | AX-156270471 |
| KCNQ1 | rs74472063  | chr11:2,466,221-2,870,340 | AX-156289286 |
| KCNQ1 | rs78344341  | chr11:2,466,221-2,870,340 | AX-30017625  |
| KCNQ1 | rs624471    | chr11:2,466,221-2,870,340 | AX-30017641  |
| KCNQ1 | rs10832548  | chr11:2,466,221-2,870,340 | AX-30017653  |
| KCNQ1 | rs10741690  | chr11:2,466,221-2,870,340 | AX-30017661  |
| KCNQ1 | rs11023834  | chr11:2,466,221-2,870,340 | AX-30017679  |
| KCNQ1 | rs201941541 | chr11:2,466,221-2,870,340 | AX-96905644  |
| KCNQ1 | rs201941541 | chr11:2,466,221-2,870,340 | AX-96929529  |
| KCNQ1 | rs35957135  | chr11:2,466,221-2,870,340 | AX-151177011 |
| KCNQ1 | rs35957135  | chr11:2,466,221-2,870,340 | AX-156289287 |
| KCNQ1 | rs12277353  | chr11:2,466,221-2,870,340 | AX-96940940  |
| KCNQ1 | rs12277353  | chr11:2,466,221-2,870,340 | AX-96960079  |
| KCNQ1 | rs364930    | chr11:2,466,221-2,870,340 | AX-96949054  |
| KCNQ1 | rs364930    | chr11:2,466,221-2,870,340 | AX-96955350  |
| KCNQ1 | rs80269905  | chr11:2,466,221-2,870,340 | AX-96732474  |
| KCNQ1 | rs145762501 | chr11:2,466,221-2,870,340 | AX-96732503  |
| KCNQ1 | rs12360708  | chr11:2,466,221-2,870,340 | AX-96774910  |

|       |             |                           |              |
|-------|-------------|---------------------------|--------------|
| KCNQ1 | rs12360708  | chr11:2,466,221-2,870,340 | AX-96781428  |
| KCNQ1 | rs7940500   | chr11:2,466,221-2,870,340 | AX-30017731  |
| KCNQ1 | rs11023840  | chr11:2,466,221-2,870,340 | AX-30017735  |
| KCNQ1 | rs2283194   | chr11:2,466,221-2,870,340 | AX-39041751  |
| KCNQ1 | rs231842    | chr11:2,466,221-2,870,340 | AX-97309245  |
| KCNQ1 | rs55786794  | chr11:2,466,221-2,870,340 | AX-156270472 |
| KCNQ1 | rs55786794  | chr11:2,466,221-2,870,340 | AX-156289288 |
| KCNQ1 | rs231841    | chr11:2,466,221-2,870,340 | AX-96645660  |
| KCNQ1 | rs231840    | chr11:2,466,221-2,870,340 | AX-96750002  |
| KCNQ1 | rs2283196   | chr11:2,466,221-2,870,340 | AX-30017861  |
| KCNQ1 | ---         | chr11:2,466,221-2,870,340 | AX-156270473 |
| KCNQ1 | ---         | chr11:2,466,221-2,870,340 | AX-156289289 |
| KCNQ1 | rs7109371   | chr11:2,466,221-2,870,340 | AX-30017871  |
| KCNQ1 | rs71473716  | chr11:2,466,221-2,870,340 | AX-30017875  |
| KCNQ1 | rs3216306   | chr11:2,466,221-2,870,340 | AX-88815609  |
| KCNQ1 | rs61870825  | chr11:2,466,221-2,870,340 | AX-30017891  |
| KCNQ1 | rs86392     | chr11:2,466,221-2,870,340 | AX-30017897  |
| KCNQ1 | rs78131     | chr11:2,466,221-2,870,340 | AX-96979470  |
| KCNQ1 | rs78131     | chr11:2,466,221-2,870,340 | AX-96990347  |
| KCNQ1 | rs7938807   | chr11:2,466,221-2,870,340 | AX-30017927  |
| KCNQ1 | rs7939695   | chr11:2,466,221-2,870,340 | AX-113885783 |
| KCNQ1 | rs7939695   | chr11:2,466,221-2,870,340 | AX-113959670 |
| KCNQ1 | rs11023855  | chr11:2,466,221-2,870,340 | AX-39041831  |
| KCNQ1 | rs2283200   | chr11:2,466,221-2,870,340 | AX-39041833  |
| KCNQ1 | rs7103496   | chr11:2,466,221-2,870,340 | AX-30017985  |
| KCNQ1 | rs231903    | chr11:2,466,221-2,870,340 | AX-96943019  |
| KCNQ1 | rs34617956  | chr11:2,466,221-2,870,340 | AX-96565456  |
| KCNQ1 | rs231901    | chr11:2,466,221-2,870,340 | AX-39041849  |
| KCNQ1 | rs73419350  | chr11:2,466,221-2,870,340 | AX-96844472  |
| KCNQ1 | rs73419350  | chr11:2,466,221-2,870,340 | AX-97364073  |
| KCNQ1 | rs129074    | chr11:2,466,221-2,870,340 | AX-50051717  |
| KCNQ1 | rs231848    | chr11:2,466,221-2,870,340 | AX-97260959  |
| KCNQ1 | rs142279615 | chr11:2,466,221-2,870,340 | AX-96973990  |
| KCNQ1 | rs142279615 | chr11:2,466,221-2,870,340 | AX-97440342  |
| KCNQ1 | rs4930149   | chr11:2,466,221-2,870,340 | AX-39041909  |
| KCNQ1 | rs231847    | chr11:2,466,221-2,870,340 | AX-30018173  |
| KCNQ1 | rs75429592  | chr11:2,466,221-2,870,340 | AX-30018181  |
| KCNQ1 | rs231846    | chr11:2,466,221-2,870,340 | AX-96776973  |
| KCNQ1 | rs231846    | chr11:2,466,221-2,870,340 | AX-97344129  |
| KCNQ1 | rs231845    | chr11:2,466,221-2,870,340 | AX-112924609 |
| KCNQ1 | rs231845    | chr11:2,466,221-2,870,340 | AX-112998691 |
| KCNQ1 | rs231844    | chr11:2,466,221-2,870,340 | AX-96992813  |
| KCNQ1 | rs2283202   | chr11:2,466,221-2,870,340 | AX-39041941  |
| KCNQ1 | rs10766310  | chr11:2,466,221-2,870,340 | AX-30018227  |
| KCNQ1 | rs57264152  | chr11:2,466,221-2,870,340 | AX-30018229  |
| KCNQ1 | rs10766311  | chr11:2,466,221-2,870,340 | AX-96562612  |
| KCNQ1 | rs10766311  | chr11:2,466,221-2,870,340 | AX-96646181  |
| KCNQ1 | rs58762055  | chr11:2,466,221-2,870,340 | AX-30018235  |
| KCNQ1 | rs231888    | chr11:2,466,221-2,870,340 | AX-96644704  |
| KCNQ1 | rs231887    | chr11:2,466,221-2,870,340 | AX-39041967  |
| KCNQ1 | rs10832572  | chr11:2,466,221-2,870,340 | AX-39041973  |
| KCNQ1 | rs74046888  | chr11:2,466,221-2,870,340 | AX-30018259  |
| KCNQ1 | rs558301516 | chr11:2,466,221-2,870,340 | AX-96563331  |
| KCNQ1 | rs558301516 | chr11:2,466,221-2,870,340 | AX-96646900  |
| KCNQ1 | rs67886747  | chr11:2,466,221-2,870,340 | AX-30018275  |

|       |            |                           |              |
|-------|------------|---------------------------|--------------|
| KCNQ1 | rs2283205  | chr11:2,466,221-2,870,340 | AX-96971954  |
| KCNQ1 | rs2283205  | chr11:2,466,221-2,870,340 | AX-97000052  |
| KCNQ1 | rs72850292 | chr11:2,466,221-2,870,340 | AX-30018287  |
| KCNQ1 | rs2283206  | chr11:2,466,221-2,870,340 | AX-30018361  |
| KCNQ1 | rs231918   | chr11:2,466,221-2,870,340 | AX-96775885  |
| KCNQ1 | rs231918   | chr11:2,466,221-2,870,340 | AX-97407864  |
| KCNQ1 | rs11600199 | chr11:2,466,221-2,870,340 | AX-39042035  |
| KCNQ1 | rs2283208  | chr11:2,466,221-2,870,340 | AX-39042045  |
| KCNQ1 | rs231917   | chr11:2,466,221-2,870,340 | AX-96562556  |
| KCNQ1 | rs231917   | chr11:2,466,221-2,870,340 | AX-96646125  |
| KCNQ1 | rs129072   | chr11:2,466,221-2,870,340 | AX-30018463  |
| KCNQ1 | rs7949421  | chr11:2,466,221-2,870,340 | AX-96960431  |
| KCNQ1 | rs7949421  | chr11:2,466,221-2,870,340 | AX-97383751  |
| KCNQ1 | rs231916   | chr11:2,466,221-2,870,340 | AX-39042131  |
| KCNQ1 | rs189161   | chr11:2,466,221-2,870,340 | AX-30018609  |
| KCNQ1 | rs2283212  | chr11:2,466,221-2,870,340 | AX-96561335  |
| KCNQ1 | rs2283212  | chr11:2,466,221-2,870,340 | AX-96644904  |
| KCNQ1 | rs231915   | chr11:2,466,221-2,870,340 | AX-39042153  |
| KCNQ1 | rs231914   | chr11:2,466,221-2,870,340 | AX-39042165  |
| KCNQ1 | rs11023925 | chr11:2,466,221-2,870,340 | AX-30018667  |
| KCNQ1 | rs231913   | chr11:2,466,221-2,870,340 | AX-96793823  |
| KCNQ1 | rs231913   | chr11:2,466,221-2,870,340 | AX-97260699  |
| KCNQ1 | rs231912   | chr11:2,466,221-2,870,340 | AX-30018705  |
| KCNQ1 | rs231911   | chr11:2,466,221-2,870,340 | AX-30018707  |
| KCNQ1 | rs170786   | chr11:2,466,221-2,870,340 | AX-39042191  |
| KCNQ1 | rs2283214  | chr11:2,466,221-2,870,340 | AX-39042193  |
| KCNQ1 | rs231910   | chr11:2,466,221-2,870,340 | AX-39042205  |
| KCNQ1 | rs78599729 | chr11:2,466,221-2,870,340 | AX-30018731  |
| KCNQ1 | rs231909   | chr11:2,466,221-2,870,340 | AX-30018735  |
| KCNQ1 | rs231908   | chr11:2,466,221-2,870,340 | AX-96564166  |
| KCNQ1 | rs78677456 | chr11:2,466,221-2,870,340 | AX-30018751  |
| KCNQ1 | rs72844252 | chr11:2,466,221-2,870,340 | AX-30018753  |
| KCNQ1 | ---        | chr11:2,466,221-2,870,340 | AX-39042227  |
| KCNQ1 | rs231906   | chr11:2,466,221-2,870,340 | AX-92330902  |
| KCNQ1 | rs231905   | chr11:2,466,221-2,870,340 | AX-30018765  |
| KCNQ1 | rs2283217  | chr11:2,466,221-2,870,340 | AX-96563987  |
| KCNQ1 | rs2283217  | chr11:2,466,221-2,870,340 | AX-96647556  |
| KCNQ1 | rs2283218  | chr11:2,466,221-2,870,340 | AX-96561980  |
| KCNQ1 | rs1110724  | chr11:2,466,221-2,870,340 | AX-96560539  |
| KCNQ1 | rs1110724  | chr11:2,466,221-2,870,340 | AX-96644108  |
| KCNQ1 | ---        | chr11:2,466,221-2,870,340 | AX-30018827  |
| KCNQ1 | ---        | chr11:2,466,221-2,870,340 | AX-96561107  |
| KCNQ1 | rs55641944 | chr11:2,466,221-2,870,340 | AX-30018839  |
| KCNQ1 | rs55641944 | chr11:2,466,221-2,870,340 | AX-96644054  |
| KCNQ1 | rs77376282 | chr11:2,466,221-2,870,340 | AX-30018841  |
| KCNQ1 | rs422316   | chr11:2,466,221-2,870,340 | AX-39042291  |
| KCNQ1 | rs422314   | chr11:2,466,221-2,870,340 | AX-96799631  |
| KCNQ1 | rs422314   | chr11:2,466,221-2,870,340 | AX-96827729  |
| KCNQ1 | rs2283220  | chr11:2,466,221-2,870,340 | AX-30018851  |
| KCNQ1 | rs11023936 | chr11:2,466,221-2,870,340 | AX-113476977 |
| KCNQ1 | rs11023936 | chr11:2,466,221-2,870,340 | AX-113885784 |
| KCNQ1 | rs2283221  | chr11:2,466,221-2,870,340 | AX-113403085 |
| KCNQ1 | rs2283221  | chr11:2,466,221-2,870,340 | AX-113476978 |
| KCNQ1 | rs2283222  | chr11:2,466,221-2,870,340 | AX-39042297  |
| KCNQ1 | rs2839990  | chr11:2,466,221-2,870,340 | AX-96980208  |

|       |             |                           |              |
|-------|-------------|---------------------------|--------------|
| KCNQ1 | rs2839990   | chr11:2,466,221-2,870,340 | AX-96991048  |
| KCNQ1 | rs450852    | chr11:2,466,221-2,870,340 | AX-39042309  |
| KCNQ1 | rs11023938  | chr11:2,466,221-2,870,340 | AX-30018923  |
| KCNQ1 | rs72844254  | chr11:2,466,221-2,870,340 | AX-96561292  |
| KCNQ1 | rs75636381  | chr11:2,466,221-2,870,340 | AX-37510641  |
| KCNQ1 | rs108961    | chr11:2,466,221-2,870,340 | AX-96565001  |
| KCNQ1 | rs108961    | chr11:2,466,221-2,870,340 | AX-96648570  |
| KCNQ1 | rs17744036  | chr11:2,466,221-2,870,340 | AX-39042363  |
| KCNQ1 | rs231880    | chr11:2,466,221-2,870,340 | AX-39042367  |
| KCNQ1 | rs12269744  | chr11:2,466,221-2,870,340 | AX-96562988  |
| KCNQ1 | rs12269744  | chr11:2,466,221-2,870,340 | AX-96646557  |
| KCNQ1 | rs1079714   | chr11:2,466,221-2,870,340 | AX-39042399  |
| KCNQ1 | rs231879    | chr11:2,466,221-2,870,340 | AX-39042415  |
| KCNQ1 | rs7114479   | chr11:2,466,221-2,870,340 | AX-96562319  |
| KCNQ1 | rs7114479   | chr11:2,466,221-2,870,340 | AX-96645888  |
| KCNQ1 | rs116164476 | chr11:2,466,221-2,870,340 | AX-96960909  |
| KCNQ1 | rs116164476 | chr11:2,466,221-2,870,340 | AX-97448247  |
| KCNQ1 | rs231878    | chr11:2,466,221-2,870,340 | AX-30019113  |
| KCNQ1 | rs2237875   | chr11:2,466,221-2,870,340 | AX-96771651  |
| KCNQ1 | rs2237875   | chr11:2,466,221-2,870,340 | AX-96786677  |
| KCNQ1 | rs78704061  | chr11:2,466,221-2,870,340 | AX-30019137  |
| KCNQ1 | rs2237876   | chr11:2,466,221-2,870,340 | AX-39042491  |
| KCNQ1 | rs74465173  | chr11:2,466,221-2,870,340 | AX-30019185  |
| KCNQ1 | rs2237877   | chr11:2,466,221-2,870,340 | AX-39042519  |
| KCNQ1 | rs2237878   | chr11:2,466,221-2,870,340 | AX-11377422  |
| KCNQ1 | rs74623003  | chr11:2,466,221-2,870,340 | AX-30019213  |
| KCNQ1 | rs231900    | chr11:2,466,221-2,870,340 | AX-96565391  |
| KCNQ1 | rs1116809   | chr11:2,466,221-2,870,340 | AX-97314503  |
| KCNQ1 | rs231899    | chr11:2,466,221-2,870,340 | AX-39042567  |
| KCNQ1 | rs1124811   | chr11:2,466,221-2,870,340 | AX-30019259  |
| KCNQ1 | rs16928624  | chr11:2,466,221-2,870,340 | AX-30019297  |
| KCNQ1 | rs74049745  | chr11:2,466,221-2,870,340 | AX-30019307  |
| KCNQ1 | rs7394507   | chr11:2,466,221-2,870,340 | AX-96810724  |
| KCNQ1 | rs147019170 | chr11:2,466,221-2,870,340 | AX-96838394  |
| KCNQ1 | rs231897    | chr11:2,466,221-2,870,340 | AX-30019345  |
| KCNQ1 | rs9888189   | chr11:2,466,221-2,870,340 | AX-144899903 |
| KCNQ1 | rs9888189   | chr11:2,466,221-2,870,340 | AX-86899498  |
| KCNQ1 | rs9888191   | chr11:2,466,221-2,870,340 | AX-88734096  |
| KCNQ1 | rs191678395 | chr11:2,466,221-2,870,340 | AX-92471715  |
| KCNQ1 | rs191678395 | chr11:2,466,221-2,870,340 | AX-96565163  |
| KCNQ1 | rs184356106 | chr11:2,466,221-2,870,340 | AX-105126776 |
| KCNQ1 | rs184356106 | chr11:2,466,221-2,870,340 | AX-96565075  |
| KCNQ1 | rs188794780 | chr11:2,466,221-2,870,340 | AX-96561624  |
| KCNQ1 | rs181943535 | chr11:2,466,221-2,870,340 | AX-96825534  |
| KCNQ1 | rs181943535 | chr11:2,466,221-2,870,340 | AX-97373820  |
| KCNQ1 | rs186376420 | chr11:2,466,221-2,870,340 | AX-96793650  |
| KCNQ1 | rs186376420 | chr11:2,466,221-2,870,340 | AX-97259369  |
| KCNQ1 | rs199596974 | chr11:2,466,221-2,870,340 | AX-96983009  |
| KCNQ1 | rs199596974 | chr11:2,466,221-2,870,340 | AX-97244934  |
| KCNQ1 | rs113369546 | chr11:2,466,221-2,870,340 | AX-96560628  |
| KCNQ1 | rs113369546 | chr11:2,466,221-2,870,340 | AX-96644197  |
| KCNQ1 | rs231896    | chr11:2,466,221-2,870,340 | AX-92479482  |
| KCNQ1 | rs231896    | chr11:2,466,221-2,870,340 | AX-96561489  |
| KCNQ1 | rs112425312 | chr11:2,466,221-2,870,340 | AX-148758485 |
| KCNQ1 | rs12287110  | chr11:2,466,221-2,870,340 | AX-144899904 |

|       |             |                           |              |
|-------|-------------|---------------------------|--------------|
| KCNQ1 | rs12287110  | chr11:2,466,221-2,870,340 | AX-144921510 |
| KCNQ1 | rs231895    | chr11:2,466,221-2,870,340 | AX-96648692  |
| KCNQ1 | rs231894    | chr11:2,466,221-2,870,340 | AX-96563890  |
| KCNQ1 | rs231893    | chr11:2,466,221-2,870,340 | AX-30019411  |
| KCNQ1 | rs231892    | chr11:2,466,221-2,870,340 | AX-30019433  |
| KCNQ1 | rs75898263  | chr11:2,466,221-2,870,340 | AX-30019449  |
| KCNQ1 | rs55763223  | chr11:2,466,221-2,870,340 | AX-30019457  |
| KCNQ1 | rs1971929   | chr11:2,466,221-2,870,340 | AX-16574066  |
| KCNQ1 | rs71476688  | chr11:2,466,221-2,870,340 | AX-30019467  |
| KCNQ1 | rs2056892   | chr11:2,466,221-2,870,340 | AX-39042679  |
| KCNQ1 | rs2018355   | chr11:2,466,221-2,870,340 | AX-30019475  |
| KCNQ1 | rs84178     | chr11:2,466,221-2,870,340 | AX-11669065  |
| KCNQ1 | rs151291    | chr11:2,466,221-2,870,340 | AX-39042699  |
| KCNQ1 | rs151292    | chr11:2,466,221-2,870,340 | AX-30019525  |
| KCNQ1 | rs74049749  | chr11:2,466,221-2,870,340 | AX-30019527  |
| KCNQ1 | rs11023994  | chr11:2,466,221-2,870,340 | AX-30019551  |
| KCNQ1 | rs231890    | chr11:2,466,221-2,870,340 | AX-39042727  |
| KCNQ1 | rs7948952   | chr11:2,466,221-2,870,340 | AX-11655528  |
| KCNQ1 | rs34441414  | chr11:2,466,221-2,870,340 | AX-96852331  |
| KCNQ1 | rs11023996  | chr11:2,466,221-2,870,340 | AX-11138612  |
| KCNQ1 | rs151219    | chr11:2,466,221-2,870,340 | AX-96563196  |
| KCNQ1 | rs151219    | chr11:2,466,221-2,870,340 | AX-96646765  |
| KCNQ1 | rs12797350  | chr11:2,466,221-2,870,340 | AX-96821929  |
| KCNQ1 | rs12797350  | chr11:2,466,221-2,870,340 | AX-97477018  |
| KCNQ1 | rs7924946   | chr11:2,466,221-2,870,340 | AX-30019585  |
| KCNQ1 | rs231889    | chr11:2,466,221-2,870,340 | AX-39042749  |
| KCNQ1 | rs115640247 | chr11:2,466,221-2,870,340 | AX-30019597  |
| KCNQ1 | rs12804860  | chr11:2,466,221-2,870,340 | AX-96970224  |
| KCNQ1 | rs12804860  | chr11:2,466,221-2,870,340 | AX-97469235  |
| KCNQ1 | rs9645650   | chr11:2,466,221-2,870,340 | AX-30019621  |
| KCNQ1 | rs11023999  | chr11:2,466,221-2,870,340 | AX-11138613  |
| KCNQ1 | rs56084107  | chr11:2,466,221-2,870,340 | AX-96560069  |
| KCNQ1 | rs56084107  | chr11:2,466,221-2,870,340 | AX-96643638  |
| KCNQ1 | rs6578296   | chr11:2,466,221-2,870,340 | AX-11573325  |
| KCNQ1 | rs200347667 | chr11:2,466,221-2,870,340 | AX-96561785  |
| KCNQ1 | rs201141910 | chr11:2,466,221-2,870,340 | AX-96644268  |
| KCNQ1 | rs179785    | chr11:2,466,221-2,870,340 | AX-16574207  |
| KCNQ1 | rs463535    | chr11:2,466,221-2,870,340 | AX-39042845  |
| KCNQ1 | rs179784    | chr11:2,466,221-2,870,340 | AX-113406651 |
| KCNQ1 | rs12789600  | chr11:2,466,221-2,870,340 | AX-96936792  |
| KCNQ1 | rs12789600  | chr11:2,466,221-2,870,340 | AX-96964492  |
| KCNQ1 | rs34861825  | chr11:2,466,221-2,870,340 | AX-96803943  |
| KCNQ1 | rs34861825  | chr11:2,466,221-2,870,340 | AX-96823424  |
| KCNQ1 | rs548566    | chr11:2,466,221-2,870,340 | AX-84610499  |
| KCNQ1 | rs548566    | chr11:2,466,221-2,870,340 | AX-84622116  |
| KCNQ1 | rs59777294  | chr11:2,466,221-2,870,340 | AX-96762679  |
| KCNQ1 | rs231877    | chr11:2,466,221-2,870,340 | AX-30019793  |
| KCNQ1 | rs231876    | chr11:2,466,221-2,870,340 | AX-97363964  |
| KCNQ1 | rs231875    | chr11:2,466,221-2,870,340 | AX-113476979 |
| KCNQ1 | rs231875    | chr11:2,466,221-2,870,340 | AX-113885785 |
| KCNQ1 | rs11024017  | chr11:2,466,221-2,870,340 | AX-39042891  |
| KCNQ1 | rs4430486   | chr11:2,466,221-2,870,340 | AX-39042893  |
| KCNQ1 | rs231873    | chr11:2,466,221-2,870,340 | AX-39042895  |
| KCNQ1 | rs4255520   | chr11:2,466,221-2,870,340 | AX-11498550  |
| KCNQ1 | rs79291597  | chr11:2,466,221-2,870,340 | AX-16574296  |

|       |             |                           |              |
|-------|-------------|---------------------------|--------------|
| KCNQ1 | rs75297165  | chr11:2,466,221-2,870,340 | AX-156270474 |
| KCNQ1 | rs75297165  | chr11:2,466,221-2,870,340 | AX-156289290 |
| KCNQ1 | rs74530907  | chr11:2,466,221-2,870,340 | AX-30019871  |
| KCNQ1 | rs74565893  | chr11:2,466,221-2,870,340 | AX-30019873  |
| KCNQ1 | rs151288    | chr11:2,466,221-2,870,340 | AX-16574301  |
| KCNQ1 | rs117143472 | chr11:2,466,221-2,870,340 | AX-54514078  |
| KCNQ1 | rs231872    | chr11:2,466,221-2,870,340 | AX-96747664  |
| KCNQ1 | rs67004488  | chr11:2,466,221-2,870,340 | AX-30019903  |
| KCNQ1 | rs12795571  | chr11:2,466,221-2,870,340 | AX-39042941  |
| KCNQ1 | rs63934     | chr11:2,466,221-2,870,340 | AX-39042943  |
| KCNQ1 | rs163160    | chr11:2,466,221-2,870,340 | AX-39042951  |
| KCNQ1 | rs2075870   | chr11:2,466,221-2,870,340 | AX-91979435  |
| KCNQ1 | rs2075870   | chr11:2,466,221-2,870,340 | AX-92004562  |
| KCNQ1 | ---         | chr11:2,466,221-2,870,340 | AX-90074940  |
| KCNQ1 | ---         | chr11:2,466,221-2,870,340 | AX-90060585  |
| KCNQ1 | ---         | chr11:2,466,221-2,870,340 | AX-90048835  |
| KCNQ1 | ---         | chr11:2,466,221-2,870,340 | AX-90063438  |
| KCNQ1 | ---         | chr11:2,466,221-2,870,340 | AX-90061731  |
| KCNQ1 | ---         | chr11:2,466,221-2,870,340 | AX-83128858  |
| KCNQ1 | ---         | chr11:2,466,221-2,870,340 | AX-90062594  |
| KCNQ1 | ---         | chr11:2,466,221-2,870,340 | AX-83404979  |
| KCNQ1 | ---         | chr11:2,466,221-2,870,340 | AX-90032494  |
| KCNQ1 | ---         | chr11:2,466,221-2,870,340 | AX-90059571  |
| KCNQ1 | ---         | chr11:2,466,221-2,870,340 | AX-90066194  |
| KCNQ1 | ---         | chr11:2,466,221-2,870,340 | AX-90030972  |
| KCNQ1 | ---         | chr11:2,466,221-2,870,340 | AX-90064332  |
| KCNQ1 | rs120074188 | chr11:2,466,221-2,870,340 | AX-86554371  |
| KCNQ1 | ---         | chr11:2,466,221-2,870,340 | AX-90033827  |
| KCNQ1 | rs199472792 | chr11:2,466,221-2,870,340 | AX-90033722  |
| KCNQ1 | rs397508097 | chr11:2,466,221-2,870,340 | AX-90058111  |
| KCNQ1 | rs11024034  | chr11:2,466,221-2,870,340 | AX-39042955  |
| KCNQ1 | rs163158    | chr11:2,466,221-2,870,340 | AX-39042963  |
| KCNQ1 | rs2237882   | chr11:2,466,221-2,870,340 | AX-96646417  |
| KCNQ1 | rs12419355  | chr11:2,466,221-2,870,340 | AX-50052041  |
| KCNQ1 | rs4930007   | chr11:2,466,221-2,870,340 | AX-96563217  |
| KCNQ1 | rs4930007   | chr11:2,466,221-2,870,340 | AX-96646786  |
| KCNQ1 | rs12420943  | chr11:2,466,221-2,870,340 | AX-30020091  |
| KCNQ1 | rs163152    | chr11:2,466,221-2,870,340 | AX-30020097  |
| KCNQ1 | rs233438    | chr11:2,466,221-2,870,340 | AX-30020099  |
| KCNQ1 | rs73419399  | chr11:2,466,221-2,870,340 | AX-30020101  |
| KCNQ1 | rs233437    | chr11:2,466,221-2,870,340 | AX-156270476 |
| KCNQ1 | rs233437    | chr11:2,466,221-2,870,340 | AX-156289292 |
| KCNQ1 | rs80305020  | chr11:2,466,221-2,870,340 | AX-96935753  |
| KCNQ1 | rs79969904  | chr11:2,466,221-2,870,340 | AX-156270478 |
| KCNQ1 | rs79969904  | chr11:2,466,221-2,870,340 | AX-156289294 |
| KCNQ1 | rs56182401  | chr11:2,466,221-2,870,340 | AX-156265998 |
| KCNQ1 | rs336982    | chr11:2,466,221-2,870,340 | AX-30020131  |
| KCNQ1 | rs12801888  | chr11:2,466,221-2,870,340 | AX-96922730  |
| KCNQ1 | rs12801888  | chr11:2,466,221-2,870,340 | AX-97409020  |
| KCNQ1 | rs35993725  | chr11:2,466,221-2,870,340 | AX-30020157  |
| KCNQ1 | rs11024045  | chr11:2,466,221-2,870,340 | AX-96925420  |
| KCNQ1 | rs11024045  | chr11:2,466,221-2,870,340 | AX-97393330  |
| KCNQ1 | rs11826085  | chr11:2,466,221-2,870,340 | AX-30020159  |
| KCNQ1 | rs114274484 | chr11:2,466,221-2,870,340 | AX-30020163  |
| KCNQ1 | rs233435    | chr11:2,466,221-2,870,340 | AX-30020187  |



|       |             |                           |             |
|-------|-------------|---------------------------|-------------|
| KCNQ1 | ---         | chr11:2,466,221-2,870,340 | AX-90029713 |
| KCNQ1 | ---         | chr11:2,466,221-2,870,340 | AX-90034978 |
| KCNQ1 | ---         | chr11:2,466,221-2,870,340 | AX-90031745 |
| KCNQ1 | ---         | chr11:2,466,221-2,870,340 | AX-90035459 |
| KCNQ1 | ---         | chr11:2,466,221-2,870,340 | AX-90035648 |
| KCNQ1 | ---         | chr11:2,466,221-2,870,340 | AX-86692996 |
| KCNQ1 | ---         | chr11:2,466,221-2,870,340 | AX-90029008 |
| KCNQ1 | ---         | chr11:2,466,221-2,870,340 | AX-90033747 |
| KCNQ1 | rs1057128   | chr11:2,466,221-2,870,340 | AX-39043031 |
| KCNQ1 | ---         | chr11:2,466,221-2,870,340 | AX-90065743 |
| KCNQ1 | ---         | chr11:2,466,221-2,870,340 | AX-90056435 |
| KCNQ1 | ---         | chr11:2,466,221-2,870,340 | AX-90027834 |
| KCNQ1 | ---         | chr11:2,466,221-2,870,340 | AX-90026922 |
| KCNQ1 | ---         | chr11:2,466,221-2,870,340 | AX-90062886 |
| KCNQ1 | ---         | chr11:2,466,221-2,870,340 | AX-90073910 |
| KCNQ1 | rs163150    | chr11:2,466,221-2,870,340 | AX-39043033 |
| KCNQ1 | rs163149    | chr11:2,466,221-2,870,340 | AX-96647902 |
| KCNQ1 | rs28730759  | chr11:2,466,221-2,870,340 | AX-30020233 |
| KCNQ1 | rs12417409  | chr11:2,466,221-2,870,340 | AX-30020237 |
| KCNQ1 | rs56021860  | chr11:2,466,221-2,870,340 | AX-30020243 |
| KCNQ1 | rs55812754  | chr11:2,466,221-2,870,340 | AX-30020245 |
| KCNQ1 | rs3852523   | chr11:2,466,221-2,870,340 | AX-96924058 |
| KCNQ1 | rs3852523   | chr11:2,466,221-2,870,340 | AX-97462314 |
| KCNQ1 | ---         | chr11:2,466,221-2,870,340 | AX-90027181 |
| KCNQ1 | ---         | chr11:2,466,221-2,870,340 | AX-90064048 |
| KCNQ1 | ---         | chr11:2,466,221-2,870,340 | AX-90034966 |
| KCNQ1 | ---         | chr11:2,466,221-2,870,340 | AX-90032671 |
| KCNQ1 | ---         | chr11:2,466,221-2,870,340 | AX-90036194 |
| KCNQ1 | ---         | chr11:2,466,221-2,870,340 | AX-90036011 |
| KCNQ1 | ---         | chr11:2,466,221-2,870,340 | AX-90080407 |
| KCNQ1 | ---         | chr11:2,466,221-2,870,340 | AX-90036260 |
| KCNQ1 | ---         | chr11:2,466,221-2,870,340 | AX-90075052 |
| KCNQ1 | ---         | chr11:2,466,221-2,870,340 | AX-90032413 |
| KCNQ1 | ---         | chr11:2,466,221-2,870,340 | AX-90048605 |
| KCNQ1 | rs81204     | chr11:2,466,221-2,870,340 | AX-39043047 |
| KCNQ1 | rs163147    | chr11:2,466,221-2,870,340 | AX-30020269 |
| KCNQ1 | rs81205     | chr11:2,466,221-2,870,340 | AX-30020273 |
| KCNQ1 | rs144087038 | chr11:2,466,221-2,870,340 | AX-96644259 |
| KCNQ1 | rs17221854  | chr11:2,466,221-2,870,340 | AX-90067145 |
| KCNQ1 | ---         | chr11:2,466,221-2,870,340 | AX-90065594 |
| KCNQ1 | rs199472811 | chr11:2,466,221-2,870,340 | AX-90038747 |
| KCNQ1 | ---         | chr11:2,466,221-2,870,340 | AX-90060455 |
| KCNQ1 | rs120074189 | chr11:2,466,221-2,870,340 | AX-90040398 |
| KCNQ1 | ---         | chr11:2,466,221-2,870,340 | AX-90032152 |
| KCNQ1 | ---         | chr11:2,466,221-2,870,340 | AX-90058855 |
| KCNQ1 | ---         | chr11:2,466,221-2,870,340 | AX-90059569 |
| KCNQ1 | ---         | chr11:2,466,221-2,870,340 | AX-86544952 |
| KCNQ1 | ---         | chr11:2,466,221-2,870,340 | AX-90030124 |
| KCNQ1 | ---         | chr11:2,466,221-2,870,340 | AX-90043599 |
| KCNQ1 | ---         | chr11:2,466,221-2,870,340 | AX-90036328 |
| KCNQ1 | ---         | chr11:2,466,221-2,870,340 | AX-90032818 |
| KCNQ1 | ---         | chr11:2,466,221-2,870,340 | AX-90060552 |
| KCNQ1 | ---         | chr11:2,466,221-2,870,340 | AX-90028870 |
| KCNQ1 | rs2237884   | chr11:2,466,221-2,870,340 | AX-96562900 |
| KCNQ1 | rs5789271   | chr11:2,466,221-2,870,340 | AX-96645675 |

|       |             |                           |              |
|-------|-------------|---------------------------|--------------|
| KCNQ1 | rs12794000  | chr11:2,466,221-2,870,340 | AX-30020331  |
| KCNQ1 | rs74049757  | chr11:2,466,221-2,870,340 | AX-30020351  |
| KCNQ1 | rs112297325 | chr11:2,466,221-2,870,340 | AX-96927262  |
| KCNQ1 | rs112297325 | chr11:2,466,221-2,870,340 | AX-97439908  |
| KCNQ1 | rs234886    | chr11:2,466,221-2,870,340 | AX-39043077  |
| KCNQ1 | rs74655828  | chr11:2,466,221-2,870,340 | AX-30020399  |
| KCNQ1 | rs79929817  | chr11:2,466,221-2,870,340 | AX-30020465  |
| KCNQ1 | rs233426    | chr11:2,466,221-2,870,340 | AX-113821678 |
| KCNQ1 | rs233426    | chr11:2,466,221-2,870,340 | AX-156265999 |
| KCNQ1 | rs234872    | chr11:2,466,221-2,870,340 | AX-96563655  |
| KCNQ1 | rs234872    | chr11:2,466,221-2,870,340 | AX-96647224  |
| KCNQ1 | rs10832699  | chr11:2,466,221-2,870,340 | AX-96734507  |
| KCNQ1 | rs10832699  | chr11:2,466,221-2,870,340 | AX-97361404  |
| KCNQ1 | rs2411883   | chr11:2,466,221-2,870,340 | AX-30020507  |
| KCNQ1 | rs234873    | chr11:2,466,221-2,870,340 | AX-39043155  |
| KCNQ1 | ---         | chr11:2,466,221-2,870,340 | AX-96807012  |
| KCNQ1 | ---         | chr11:2,466,221-2,870,340 | AX-96822158  |
| KCNQ1 | rs76092236  | chr11:2,466,221-2,870,340 | AX-30020517  |
| KCNQ1 | rs11024084  | chr11:2,466,221-2,870,340 | AX-30020525  |
| KCNQ1 | rs3899907   | chr11:2,466,221-2,870,340 | AX-156270479 |
| KCNQ1 | rs3899907   | chr11:2,466,221-2,870,340 | AX-156289295 |
| KCNQ1 | rs33915190  | chr11:2,466,221-2,870,340 | AX-96949397  |
| KCNQ1 | rs33915190  | chr11:2,466,221-2,870,340 | AX-97410935  |
| KCNQ1 | rs12271773  | chr11:2,466,221-2,870,340 | AX-30020533  |
| KCNQ1 | rs147129460 | chr11:2,466,221-2,870,340 | AX-96563021  |
| KCNQ1 | rs147129460 | chr11:2,466,221-2,870,340 | AX-96646590  |
| KCNQ1 | rs149145    | chr11:2,466,221-2,870,340 | AX-96734541  |
| KCNQ1 | rs149145    | chr11:2,466,221-2,870,340 | AX-96754136  |
| KCNQ1 | rs2237885   | chr11:2,466,221-2,870,340 | AX-112999633 |
| KCNQ1 | rs149373    | chr11:2,466,221-2,870,340 | AX-30020545  |
| KCNQ1 | rs234875    | chr11:2,466,221-2,870,340 | AX-30020547  |
| KCNQ1 | rs2237886   | chr11:2,466,221-2,870,340 | AX-39043197  |
| KCNQ1 | rs33985488  | chr11:2,466,221-2,870,340 | AX-96843504  |
| KCNQ1 | rs149419928 | chr11:2,466,221-2,870,340 | AX-96829103  |
| KCNQ1 | rs199870336 | chr11:2,466,221-2,870,340 | AX-96562869  |
| KCNQ1 | rs11024104  | chr11:2,466,221-2,870,340 | AX-30020625  |
| KCNQ1 | rs163163    | chr11:2,466,221-2,870,340 | AX-96898619  |
| KCNQ1 | rs163163    | chr11:2,466,221-2,870,340 | AX-97429710  |
| KCNQ1 | rs61869764  | chr11:2,466,221-2,870,340 | AX-96949724  |
| KCNQ1 | rs61869764  | chr11:2,466,221-2,870,340 | AX-97334293  |
| KCNQ1 | rs61479768  | chr11:2,466,221-2,870,340 | AX-96561039  |
| KCNQ1 | rs201833716 | chr11:2,466,221-2,870,340 | AX-96563474  |
| KCNQ1 | rs201833716 | chr11:2,466,221-2,870,340 | AX-96647043  |
| KCNQ1 | ---         | chr11:2,466,221-2,870,340 | AX-30020667  |
| KCNQ1 | rs234877    | chr11:2,466,221-2,870,340 | AX-30020673  |
| KCNQ1 | rs35569550  | chr11:2,466,221-2,870,340 | AX-30020679  |
| KCNQ1 | rs336986    | chr11:2,466,221-2,870,340 | AX-30020681  |
| KCNQ1 | rs115950318 | chr11:2,466,221-2,870,340 | AX-37510671  |
| KCNQ1 | rs2074200   | chr11:2,466,221-2,870,340 | AX-39043269  |
| KCNQ1 | rs234879    | chr11:2,466,221-2,870,340 | AX-30020729  |
| KCNQ1 | rs234880    | chr11:2,466,221-2,870,340 | AX-30020737  |
| KCNQ1 | rs116777634 | chr11:2,466,221-2,870,340 | AX-156270480 |
| KCNQ1 | rs116777634 | chr11:2,466,221-2,870,340 | AX-156289296 |
| KCNQ1 | rs79264824  | chr11:2,466,221-2,870,340 | AX-156270481 |
| KCNQ1 | rs79264824  | chr11:2,466,221-2,870,340 | AX-156289297 |

|       |             |                           |              |
|-------|-------------|---------------------------|--------------|
| KCNQ1 | rs234881    | chr11:2,466,221-2,870,340 | AX-30020743  |
| KCNQ1 | rs234882    | chr11:2,466,221-2,870,340 | AX-96563159  |
| KCNQ1 | rs3835012   | chr11:2,466,221-2,870,340 | AX-88766573  |
| KCNQ1 | ---         | chr11:2,466,221-2,870,340 | AX-113175402 |
| KCNQ1 | rs75353552  | chr11:2,466,221-2,870,340 | AX-30020785  |
| KCNQ1 | rs233442    | chr11:2,466,221-2,870,340 | AX-30020795  |
| KCNQ1 | ---         | chr11:2,466,221-2,870,340 | AX-30020797  |
| KCNQ1 | rs123379    | chr11:2,466,221-2,870,340 | AX-30020805  |
| KCNQ1 | rs3852525   | chr11:2,466,221-2,870,340 | AX-96561987  |
| KCNQ1 | rs3852525   | chr11:2,466,221-2,870,340 | AX-96645556  |
| KCNQ1 | rs233440    | chr11:2,466,221-2,870,340 | AX-96560688  |
| KCNQ1 | rs233440    | chr11:2,466,221-2,870,340 | AX-96644257  |
| KCNQ1 | rs78013     | chr11:2,466,221-2,870,340 | AX-96561798  |
| KCNQ1 | rs116463395 | chr11:2,466,221-2,870,340 | AX-30020831  |
| KCNQ1 | rs151316    | chr11:2,466,221-2,870,340 | AX-39043311  |
| KCNQ1 | rs79677993  | chr11:2,466,221-2,870,340 | AX-30020841  |
| KCNQ1 | rs61869807  | chr11:2,466,221-2,870,340 | AX-156270482 |
| KCNQ1 | rs61869807  | chr11:2,466,221-2,870,340 | AX-156289298 |
| KCNQ1 | rs11024137  | chr11:2,466,221-2,870,340 | AX-39043319  |
| KCNQ1 | rs7112108   | chr11:2,466,221-2,870,340 | AX-30020867  |
| KCNQ1 | rs163172    | chr11:2,466,221-2,870,340 | AX-30020873  |
| KCNQ1 | rs78768485  | chr11:2,466,221-2,870,340 | AX-30020897  |
| KCNQ1 | rs163171    | chr11:2,466,221-2,870,340 | AX-39043347  |
| KCNQ1 | rs75546812  | chr11:2,466,221-2,870,340 | AX-30020903  |
| KCNQ1 | rs115693586 | chr11:2,466,221-2,870,340 | AX-30020907  |
| KCNQ1 | rs163170    | chr11:2,466,221-2,870,340 | AX-30020915  |
| KCNQ1 | rs151290    | chr11:2,466,221-2,870,340 | AX-96091048  |
| KCNQ1 | rs78878449  | chr11:2,466,221-2,870,340 | AX-156270483 |
| KCNQ1 | rs78878449  | chr11:2,466,221-2,870,340 | AX-156289299 |
| KCNQ1 | rs78868563  | chr11:2,466,221-2,870,340 | AX-96809634  |
| KCNQ1 | rs78868563  | chr11:2,466,221-2,870,340 | AX-97251336  |
| KCNQ1 | rs163169    | chr11:2,466,221-2,870,340 | AX-30020991  |
| KCNQ1 | rs17744869  | chr11:2,466,221-2,870,340 | AX-96564545  |
| KCNQ1 | rs17744869  | chr11:2,466,221-2,870,340 | AX-96648114  |
| KCNQ1 | rs163168    | chr11:2,466,221-2,870,340 | AX-30021005  |
| KCNQ1 | ---         | chr11:2,466,221-2,870,340 | AX-96560930  |
| KCNQ1 | ---         | chr11:2,466,221-2,870,340 | AX-96644499  |
| KCNQ1 | rs151289    | chr11:2,466,221-2,870,340 | AX-96828427  |
| KCNQ1 | rs151289    | chr11:2,466,221-2,870,340 | AX-97325734  |
| KCNQ1 | rs163167    | chr11:2,466,221-2,870,340 | AX-156278925 |
| KCNQ1 | rs163167    | chr11:2,466,221-2,870,340 | AX-156294965 |
| KCNQ1 | rs2074196   | chr11:2,466,221-2,870,340 | AX-39043399  |
| KCNQ1 | rs163166    | chr11:2,466,221-2,870,340 | AX-113897492 |
| KCNQ1 | rs2074197   | chr11:2,466,221-2,870,340 | AX-39043413  |
| KCNQ1 | rs11602964  | chr11:2,466,221-2,870,340 | AX-39043429  |
| KCNQ1 | rs163165    | chr11:2,466,221-2,870,340 | AX-30021043  |
| KCNQ1 | rs74602888  | chr11:2,466,221-2,870,340 | AX-30021047  |
| KCNQ1 | rs10766379  | chr11:2,466,221-2,870,340 | AX-39043433  |
| KCNQ1 | rs163164    | chr11:2,466,221-2,870,340 | AX-112934182 |
| KCNQ1 | rs163164    | chr11:2,466,221-2,870,340 | AX-113973362 |
| KCNQ1 | rs3852527   | chr11:2,466,221-2,870,340 | AX-96915223  |
| KCNQ1 | rs3852527   | chr11:2,466,221-2,870,340 | AX-96917395  |
| KCNQ1 | rs3852528   | chr11:2,466,221-2,870,340 | AX-39043451  |
| KCNQ1 | rs3852529   | chr11:2,466,221-2,870,340 | AX-30021091  |
| KCNQ1 | rs72844287  | chr11:2,466,221-2,870,340 | AX-30021115  |

|       |             |                           |              |
|-------|-------------|---------------------------|--------------|
| KCNQ1 | rs11601574  | chr11:2,466,221-2,870,340 | AX-96734371  |
| KCNQ1 | rs11601574  | chr11:2,466,221-2,870,340 | AX-97262621  |
| KCNQ1 | rs59809880  | chr11:2,466,221-2,870,340 | AX-30021145  |
| KCNQ1 | rs76173700  | chr11:2,466,221-2,870,340 | AX-30021159  |
| KCNQ1 | rs11024175  | chr11:2,466,221-2,870,340 | AX-30021163  |
| KCNQ1 | rs7943684   | chr11:2,466,221-2,870,340 | AX-30021173  |
| KCNQ1 | rs58945252  | chr11:2,466,221-2,870,340 | AX-96753165  |
| KCNQ1 | rs58945252  | chr11:2,466,221-2,870,340 | AX-97465952  |
| KCNQ1 | rs8181588   | chr11:2,466,221-2,870,340 | AX-39043503  |
| KCNQ1 | rs9971505   | chr11:2,466,221-2,870,340 | AX-30021203  |
| KCNQ1 | rs112466472 | chr11:2,466,221-2,870,340 | AX-30021207  |
| KCNQ1 | rs2237888   | chr11:2,466,221-2,870,340 | AX-55765344  |
| KCNQ1 | rs2237888   | chr11:2,466,221-2,870,340 | AX-97441900  |
| KCNQ1 | rs4930008   | chr11:2,466,221-2,870,340 | AX-30021245  |
| KCNQ1 | rs11024184  | chr11:2,466,221-2,870,340 | AX-30021259  |
| KCNQ1 | rs71029160  | chr11:2,466,221-2,870,340 | AX-96993166  |
| KCNQ1 | rs234842    | chr11:2,466,221-2,870,340 | AX-96847035  |
| KCNQ1 | rs121256    | chr11:2,466,221-2,870,340 | AX-30021323  |
| KCNQ1 | rs2237890   | chr11:2,466,221-2,870,340 | AX-96875845  |
| KCNQ1 | rs2237890   | chr11:2,466,221-2,870,340 | AX-96886584  |
| KCNQ1 | rs123381    | chr11:2,466,221-2,870,340 | AX-96563609  |
| KCNQ1 | rs123381    | chr11:2,466,221-2,870,340 | AX-96647178  |
| KCNQ1 | rs7480855   | chr11:2,466,221-2,870,340 | AX-39043547  |
| KCNQ1 | rs234844    | chr11:2,466,221-2,870,340 | AX-97001277  |
| KCNQ1 | rs234844    | chr11:2,466,221-2,870,340 | AX-97294274  |
| KCNQ1 | rs72844290  | chr11:2,466,221-2,870,340 | AX-96846859  |
| KCNQ1 | rs233446    | chr11:2,466,221-2,870,340 | AX-39043561  |
| KCNQ1 | rs233447    | chr11:2,466,221-2,870,340 | AX-50052117  |
| KCNQ1 | rs12285496  | chr11:2,466,221-2,870,340 | AX-39043563  |
| KCNQ1 | rs163177    | chr11:2,466,221-2,870,340 | AX-39043573  |
| KCNQ1 | rs12284372  | chr11:2,466,221-2,870,340 | AX-39043581  |
| KCNQ1 | rs16928694  | chr11:2,466,221-2,870,340 | AX-39043583  |
| KCNQ1 | rs2237892   | chr11:2,466,221-2,870,340 | AX-50943236  |
| KCNQ1 | rs2237893   | chr11:2,466,221-2,870,340 | AX-39043589  |
| KCNQ1 | rs233448    | chr11:2,466,221-2,870,340 | AX-39043603  |
| KCNQ1 | rs57845237  | chr11:2,466,221-2,870,340 | AX-96976476  |
| KCNQ1 | rs57845237  | chr11:2,466,221-2,870,340 | AX-97382568  |
| KCNQ1 | rs151293    | chr11:2,466,221-2,870,340 | AX-96847405  |
| KCNQ1 | rs151293    | chr11:2,466,221-2,870,340 | AX-97368630  |
| KCNQ1 | rs12294675  | chr11:2,466,221-2,870,340 | AX-39043657  |
| KCNQ1 | rs11606985  | chr11:2,466,221-2,870,340 | AX-39043671  |
| KCNQ1 | rs233449    | chr11:2,466,221-2,870,340 | AX-39043675  |
| KCNQ1 | rs233450    | chr11:2,466,221-2,870,340 | AX-39043679  |
| KCNQ1 | rs77450170  | chr11:2,466,221-2,870,340 | AX-30021525  |
| KCNQ1 | rs163182    | chr11:2,466,221-2,870,340 | AX-92330395  |
| KCNQ1 | rs163182    | chr11:2,466,221-2,870,340 | AX-92330903  |
| KCNQ1 | rs163183    | chr11:2,466,221-2,870,340 | AX-39043683  |
| KCNQ1 | rs77239547  | chr11:2,466,221-2,870,340 | AX-30021539  |
| KCNQ1 | rs7111394   | chr11:2,466,221-2,870,340 | AX-39043693  |
| KCNQ1 | ---         | chr11:2,466,221-2,870,340 | AX-156269162 |
| KCNQ1 | ---         | chr11:2,466,221-2,870,340 | AX-156288714 |
| KCNQ1 | rs234850    | chr11:2,466,221-2,870,340 | AX-30021579  |
| KCNQ1 | rs139647931 | chr11:2,466,221-2,870,340 | AX-97434768  |
| KCNQ1 | rs202159835 | chr11:2,466,221-2,870,340 | AX-96954198  |
| KCNQ1 | rs233451    | chr11:2,466,221-2,870,340 | AX-96943686  |

|       |            |                           |              |
|-------|------------|---------------------------|--------------|
| KCNQ1 | rs60513508 | chr11:2,466,221-2,870,340 | AX-30021599  |
| KCNQ1 | rs163184   | chr11:2,466,221-2,870,340 | AX-96743197  |
| KCNQ1 | rs163184   | chr11:2,466,221-2,870,340 | AX-96745408  |
| KCNQ1 | rs2283228  | chr11:2,466,221-2,870,340 | AX-11381501  |
| KCNQ1 | rs3854430  | chr11:2,466,221-2,870,340 | AX-39043757  |
| KCNQ1 | rs79444906 | chr11:2,466,221-2,870,340 | AX-54514305  |
| KCNQ1 | rs234852   | chr11:2,466,221-2,870,340 | AX-96841176  |
| KCNQ1 | rs234852   | chr11:2,466,221-2,870,340 | AX-97395462  |
| KCNQ1 | rs234853   | chr11:2,466,221-2,870,340 | AX-39043761  |
| KCNQ1 | rs234854   | chr11:2,466,221-2,870,340 | AX-39043763  |
| KCNQ1 | rs234855   | chr11:2,466,221-2,870,340 | AX-96905207  |
| KCNQ1 | rs234855   | chr11:2,466,221-2,870,340 | AX-97279159  |
| KCNQ1 | rs78503325 | chr11:2,466,221-2,870,340 | AX-16575160  |
| KCNQ1 | rs234856   | chr11:2,466,221-2,870,340 | AX-97425379  |
| KCNQ1 | rs234857   | chr11:2,466,221-2,870,340 | AX-39043795  |
| KCNQ1 | ---        | chr11:2,466,221-2,870,340 | AX-96904285  |
| KCNQ1 | rs234859   | chr11:2,466,221-2,870,340 | AX-96817701  |
| KCNQ1 | rs234859   | chr11:2,466,221-2,870,340 | AX-97464981  |
| KCNQ1 | rs72844296 | chr11:2,466,221-2,870,340 | AX-96561777  |
| KCNQ1 | rs72844296 | chr11:2,466,221-2,870,340 | AX-96645346  |
| KCNQ1 | rs234860   | chr11:2,466,221-2,870,340 | AX-39043805  |
| KCNQ1 | rs234861   | chr11:2,466,221-2,870,340 | AX-97315472  |
| KCNQ1 | rs234862   | chr11:2,466,221-2,870,340 | AX-96563873  |
| KCNQ1 | rs234862   | chr11:2,466,221-2,870,340 | AX-96647442  |
| KCNQ1 | ---        | chr11:2,466,221-2,870,340 | AX-96929444  |
| KCNQ1 | ---        | chr11:2,466,221-2,870,340 | AX-97361848  |
| KCNQ1 | rs234863   | chr11:2,466,221-2,870,340 | AX-96732014  |
| KCNQ1 | rs234863   | chr11:2,466,221-2,870,340 | AX-97359249  |
| KCNQ1 | rs11819853 | chr11:2,466,221-2,870,340 | AX-30021849  |
| KCNQ1 | rs77886408 | chr11:2,466,221-2,870,340 | AX-96755878  |
| KCNQ1 | rs77886408 | chr11:2,466,221-2,870,340 | AX-97293393  |
| KCNQ1 | ---        | chr11:2,466,221-2,870,340 | AX-96956780  |
| KCNQ1 | rs2237895  | chr11:2,466,221-2,870,340 | AX-30021863  |
| KCNQ1 | rs60808706 | chr11:2,466,221-2,870,340 | AX-30021869  |
| KCNQ1 | rs234864   | chr11:2,466,221-2,870,340 | AX-96941825  |
| KCNQ1 | rs234865   | chr11:2,466,221-2,870,340 | AX-39043847  |
| KCNQ1 | rs234866   | chr11:2,466,221-2,870,340 | AX-30021893  |
| KCNQ1 | rs2299620  | chr11:2,466,221-2,870,340 | AX-113959671 |
| KCNQ1 | rs72847582 | chr11:2,466,221-2,870,340 | AX-30021919  |
| KCNQ1 | rs2237897  | chr11:2,466,221-2,870,340 | AX-50943240  |
| KCNQ1 | rs234867   | chr11:2,466,221-2,870,340 | AX-96565358  |
| KCNQ1 | rs234867   | chr11:2,466,221-2,870,340 | AX-96648927  |
| KCNQ1 | rs458069   | chr11:2,466,221-2,870,340 | AX-96562473  |
| KCNQ1 | rs458069   | chr11:2,466,221-2,870,340 | AX-96646042  |
| KCNQ1 | rs234868   | chr11:2,466,221-2,870,340 | AX-96563668  |
| KCNQ1 | rs234868   | chr11:2,466,221-2,870,340 | AX-96647237  |
| KCNQ1 | rs73421349 | chr11:2,466,221-2,870,340 | AX-30021927  |
| KCNQ1 | ---        | chr11:2,466,221-2,870,340 | AX-39043869  |
| KCNQ1 | ---        | chr11:2,466,221-2,870,340 | AX-30021929  |
| KCNQ1 | rs72847583 | chr11:2,466,221-2,870,340 | AX-30021933  |
| KCNQ1 | rs234869   | chr11:2,466,221-2,870,340 | AX-96560637  |
| KCNQ1 | rs234869   | chr11:2,466,221-2,870,340 | AX-96644206  |
| KCNQ1 | rs72847584 | chr11:2,466,221-2,870,340 | AX-96879760  |
| KCNQ1 | rs72847584 | chr11:2,466,221-2,870,340 | AX-96886216  |
| KCNQ1 | rs234870   | chr11:2,466,221-2,870,340 | AX-96739550  |

|       |             |                              |              |
|-------|-------------|------------------------------|--------------|
| KCNQ1 | rs234870    | chr11:2,466,221-2,870,340    | AX-97438273  |
| KCNQ1 | rs36157111  | chr11:2,466,221-2,870,340    | AX-96562205  |
| KCNQ1 | rs36157111  | chr11:2,466,221-2,870,340    | AX-96645774  |
| KCNQ1 | rs76863355  | chr11:2,466,221-2,870,340    | AX-30021947  |
| KCNQ1 | rs2583416   | chr11:2,466,221-2,870,340    | AX-30021949  |
| KCNQ1 | rs113030218 | chr11:2,466,221-2,870,340    | AX-96841510  |
| KCNQ1 | rs113030218 | chr11:2,466,221-2,870,340    | AX-96856469  |
| KCNQ1 | ---         | chr11:2,466,221-2,870,340    | AX-96561359  |
| KCNQ1 | rs145254979 | chr11:2,466,221-2,870,340    | AX-97464433  |
| KCNQ1 | ---         | chr11:2,466,221-2,870,340    | AX-151370684 |
| KCNQ1 | ---         | chr11:2,466,221-2,870,340    | AX-156298531 |
| KCNQ1 | rs57823802  | chr11:2,466,221-2,870,340    | AX-151321457 |
| KCNQ1 | rs57823802  | chr11:2,466,221-2,870,340    | AX-156286374 |
| KCNQ1 | rs58579655  | chr11:2,466,221-2,870,340    | AX-30021997  |
| KCNQ1 | rs77919905  | chr11:2,466,221-2,870,340    | AX-37510719  |
| KCNQ1 | rs4930012   | chr11:2,466,221-2,870,340    | AX-39043879  |
| KCNQ1 | rs10741726  | chr11:2,466,221-2,870,340    | AX-39043885  |
| KCNQ1 | rs12284138  | chr11:2,466,221-2,870,340    | AX-39043889  |
| KCNQ1 | rs201591401 | chr11:2,466,221-2,870,340    | AX-96949594  |
| KCNQ1 | rs79774694  | chr11:2,466,221-2,870,340    | AX-30022017  |
| KCNQ1 | rs4930013   | chr11:2,466,221-2,870,340    | AX-39043891  |
| KCNQ1 | rs2283229   | chr11:2,466,221-2,870,340    | AX-39043895  |
| KCNQ1 | rs11024304  | chr11:2,466,221-2,870,340    | AX-39043905  |
| KCNQ1 | rs433052    | chr11:2,466,221-2,870,340    | AX-39043907  |
| KCNQ1 | rs2005833   | chr11:2,466,221-2,870,340    | AX-96643819  |
| KCNQ1 | rs2237898   | chr11:2,466,221-2,870,340    | AX-39043915  |
| KCNQ1 | rs2001170   | chr11:2,466,221-2,870,340    | AX-30022101  |
| KCNQ1 | rs2237899   | chr11:2,466,221-2,870,340    | AX-39043937  |
| KCNQ1 | rs12277369  | chr11:2,466,221-2,870,340    | AX-96560674  |
| KCNQ1 | rs35877729  | chr11:2,466,221-2,870,340    | AX-96977499  |
| KCNQ1 | rs35877729  | chr11:2,466,221-2,870,340    | AX-97405641  |
| KCNQ1 | rs2237900   | chr11:2,466,221-2,870,340    | AX-30022153  |
| KCNQ1 | rs72847587  | chr11:2,466,221-2,870,340    | AX-30022161  |
| KCNQ1 | rs12419030  | chr11:2,466,221-2,870,340    | AX-30022163  |
| KCNQ1 | rs34075935  | chr11:2,466,221-2,870,340    | AX-30022165  |
| KCNQ1 | rs12419347  | chr11:2,466,221-2,870,340    | AX-39043959  |
| KCNQ1 | rs12281297  | chr11:2,466,221-2,870,340    | AX-30022177  |
| KCNQ1 | rs79788804  | chr11:2,466,221-2,870,340    | AX-30022185  |
| KCNQ1 | rs3852520   | chr11:2,466,221-2,870,340    | AX-30022187  |
| KCNQ1 | ---         | chr11:2,466,221-2,870,340    | AX-90061500  |
| KCNQ1 | ---         | chr11:2,466,221-2,870,340    | AX-90042994  |
| KCNQ1 | ---         | chr11:2,466,221-2,870,340    | AX-83102818  |
| KCNQ1 | ---         | chr11:2,466,221-2,870,340    | AX-90073628  |
| KCNQ1 | ---         | chr11:2,466,221-2,870,340    | AX-90058758  |
| KCNQ1 | ---         | chr11:2,466,221-2,870,340    | AX-90063375  |
| KCNQ1 | ---         | chr11:2,466,221-2,870,340    | AX-90081540  |
| KCNQ1 | rs34150427  | chr11:2,466,221-2,870,340    | AX-83416849  |
| KCNQ1 | ---         | chr11:2,466,221-2,870,340    | AX-147942546 |
| KCNQ1 | rs8234      | chr11:2,466,221-2,870,340    | AX-39043981  |
| KCNQ1 | rs10798     | chr11:2,466,221-2,870,340    | AX-39043985  |
| LAMA4 | rs7758715   | chr6:112,429,134-112,575,917 | AX-151195108 |
| LAMA4 | rs7758715   | chr6:112,429,134-112,575,917 | AX-156275970 |
| LAMA4 | rs7738331   | chr6:112,429,134-112,575,917 | AX-156275971 |
| LAMA4 | rs7758910   | chr6:112,429,134-112,575,917 | AX-156275972 |
| LAMA4 | rs7758910   | chr6:112,429,134-112,575,917 | AX-156292992 |

|       |             |                              |              |
|-------|-------------|------------------------------|--------------|
| LAMA4 | rs6568718   | chr6:112,429,134-112,575,917 | AX-11572609  |
| LAMA4 | rs199529261 | chr6:112,429,134-112,575,917 | AX-151465361 |
| LAMA4 | rs199529261 | chr6:112,429,134-112,575,917 | AX-156297787 |
| LAMA4 | rs3734291   | chr6:112,429,134-112,575,917 | AX-156275973 |
| LAMA4 | rs3734291   | chr6:112,429,134-112,575,917 | AX-156292993 |
| LAMA4 | rs12204892  | chr6:112,429,134-112,575,917 | AX-147878709 |
| LAMA4 | rs12204892  | chr6:112,429,134-112,575,917 | AX-147972500 |
| LAMA4 | rs112343659 | chr6:112,429,134-112,575,917 | AX-151213403 |
| LAMA4 | ---         | chr6:112,429,134-112,575,917 | AX-151296457 |
| LAMA4 | ---         | chr6:112,429,134-112,575,917 | AX-156298055 |
| LAMA4 | rs73541478  | chr6:112,429,134-112,575,917 | AX-15194976  |
| LAMA4 | rs73541481  | chr6:112,429,134-112,575,917 | AX-15194977  |
| LAMA4 | rs73541482  | chr6:112,429,134-112,575,917 | AX-15194978  |
| LAMA4 | rs73541483  | chr6:112,429,134-112,575,917 | AX-15194980  |
| LAMA4 | rs11962253  | chr6:112,429,134-112,575,917 | AX-15194981  |
| LAMA4 | rs11153341  | chr6:112,429,134-112,575,917 | AX-148275933 |
| LAMA4 | rs11153341  | chr6:112,429,134-112,575,917 | AX-156275974 |
| LAMA4 | rs6941214   | chr6:112,429,134-112,575,917 | AX-156275975 |
| LAMA4 | rs6942296   | chr6:112,429,134-112,575,917 | AX-156275976 |
| LAMA4 | rs6942296   | chr6:112,429,134-112,575,917 | AX-156292995 |
| LAMA4 | rs6921882   | chr6:112,429,134-112,575,917 | AX-41820509  |
| LAMA4 | rs3777947   | chr6:112,429,134-112,575,917 | AX-15194987  |
| LAMA4 | ---         | chr6:112,429,134-112,575,917 | AX-15194988  |
| LAMA4 | ---         | chr6:112,429,134-112,575,917 | AX-88815315  |
| LAMA4 | rs3777946   | chr6:112,429,134-112,575,917 | AX-156275977 |
| LAMA4 | rs3777945   | chr6:112,429,134-112,575,917 | AX-15194989  |
| LAMA4 | rs3777944   | chr6:112,429,134-112,575,917 | AX-156275978 |
| LAMA4 | rs3777944   | chr6:112,429,134-112,575,917 | AX-156292997 |
| LAMA4 | rs3777943   | chr6:112,429,134-112,575,917 | AX-15194990  |
| LAMA4 | rs11961355  | chr6:112,429,134-112,575,917 | AX-15194992  |
| LAMA4 | rs10456878  | chr6:112,429,134-112,575,917 | AX-35507873  |
| LAMA4 | rs12191016  | chr6:112,429,134-112,575,917 | AX-41820515  |
| LAMA4 | rs3734290   | chr6:112,429,134-112,575,917 | AX-35507877  |
| LAMA4 | rs3734289   | chr6:112,429,134-112,575,917 | AX-15194994  |
| LAMA4 | ---         | chr6:112,429,134-112,575,917 | AX-151201376 |
| LAMA4 | rs6916947   | chr6:112,429,134-112,575,917 | AX-12614227  |
| LAMA4 | rs6917142   | chr6:112,429,134-112,575,917 | AX-15194998  |
| LAMA4 | rs11969913  | chr6:112,429,134-112,575,917 | AX-41820517  |
| LAMA4 | rs1050353   | chr6:112,429,134-112,575,917 | AX-15194999  |
| LAMA4 | rs73541486  | chr6:112,429,134-112,575,917 | AX-15195002  |
| LAMA4 | rs4947169   | chr6:112,429,134-112,575,917 | AX-11538071  |
| LAMA4 | rs147507413 | chr6:112,429,134-112,575,917 | AX-119778444 |
| LAMA4 | rs73541488  | chr6:112,429,134-112,575,917 | AX-35507879  |
| LAMA4 | rs9481223   | chr6:112,429,134-112,575,917 | AX-156282397 |
| LAMA4 | rs12190980  | chr6:112,429,134-112,575,917 | AX-156275979 |
| LAMA4 | rs12190980  | chr6:112,429,134-112,575,917 | AX-156292998 |
| LAMA4 | rs7764311   | chr6:112,429,134-112,575,917 | AX-41820523  |
| LAMA4 | rs6908892   | chr6:112,429,134-112,575,917 | AX-15195004  |
| LAMA4 | rs73541491  | chr6:112,429,134-112,575,917 | AX-15195006  |
| LAMA4 | rs73541494  | chr6:112,429,134-112,575,917 | AX-15195008  |
| LAMA4 | rs1160798   | chr6:112,429,134-112,575,917 | AX-15195009  |
| LAMA4 | rs3216857   | chr6:112,429,134-112,575,917 | AX-83596595  |
| LAMA4 | ---         | chr6:112,429,134-112,575,917 | AX-83386956  |
| LAMA4 | ---         | chr6:112,429,134-112,575,917 | AX-83087924  |
| LAMA4 | ---         | chr6:112,429,134-112,575,917 | AX-90044665  |

|       |             |                              |              |
|-------|-------------|------------------------------|--------------|
| LAMA4 | rs73541498  | chr6:112,429,134-112,575,917 | AX-15195010  |
| LAMA4 | rs73541501  | chr6:112,429,134-112,575,917 | AX-156275980 |
| LAMA4 | rs73541501  | chr6:112,429,134-112,575,917 | AX-156292999 |
| LAMA4 | rs73543603  | chr6:112,429,134-112,575,917 | AX-15195014  |
| LAMA4 | rs73530790  | chr6:112,429,134-112,575,917 | AX-15195015  |
| LAMA4 | rs35679345  | chr6:112,429,134-112,575,917 | AX-41820525  |
| LAMA4 | rs73530792  | chr6:112,429,134-112,575,917 | AX-15195017  |
| LAMA4 | rs73530795  | chr6:112,429,134-112,575,917 | AX-15195019  |
| LAMA4 | rs764196    | chr6:112,429,134-112,575,917 | AX-12635178  |
| LAMA4 | rs61459671  | chr6:112,429,134-112,575,917 | AX-15195020  |
| LAMA4 | rs111944498 | chr6:112,429,134-112,575,917 | AX-151396609 |
| LAMA4 | rs111944498 | chr6:112,429,134-112,575,917 | AX-156284674 |
| LAMA4 | rs10452631  | chr6:112,429,134-112,575,917 | AX-35507889  |
| LAMA4 | rs9384821   | chr6:112,429,134-112,575,917 | AX-11578137  |
| LAMA4 | rs9384821   | chr6:112,429,134-112,575,917 | AX-148309517 |
| LAMA4 | rs111326675 | chr6:112,429,134-112,575,917 | AX-148133459 |
| LAMA4 | rs111326675 | chr6:112,429,134-112,575,917 | AX-148693942 |
| LAMA4 | rs10452616  | chr6:112,429,134-112,575,917 | AX-41820529  |
| LAMA4 | rs10452617  | chr6:112,429,134-112,575,917 | AX-41820531  |
| LAMA4 | rs10452633  | chr6:112,429,134-112,575,917 | AX-41820533  |
| LAMA4 | rs10452635  | chr6:112,429,134-112,575,917 | AX-41820537  |
| LAMA4 | rs7763664   | chr6:112,429,134-112,575,917 | AX-41820539  |
| LAMA4 | rs4945897   | chr6:112,429,134-112,575,917 | AX-15195024  |
| LAMA4 | rs77699322  | chr6:112,429,134-112,575,917 | AX-15195027  |
| LAMA4 | rs73532603  | chr6:112,429,134-112,575,917 | AX-15195028  |
| LAMA4 | rs73532606  | chr6:112,429,134-112,575,917 | AX-15195029  |
| LAMA4 | rs73532607  | chr6:112,429,134-112,575,917 | AX-156275981 |
| LAMA4 | rs73532607  | chr6:112,429,134-112,575,917 | AX-156293000 |
| LAMA4 | rs73532610  | chr6:112,429,134-112,575,917 | AX-156275982 |
| LAMA4 | rs73532610  | chr6:112,429,134-112,575,917 | AX-156293001 |
| LAMA4 | rs11153342  | chr6:112,429,134-112,575,917 | AX-15195032  |
| LAMA4 | rs11962711  | chr6:112,429,134-112,575,917 | AX-15195033  |
| LAMA4 | rs73532613  | chr6:112,429,134-112,575,917 | AX-15195034  |
| LAMA4 | rs2032564   | chr6:112,429,134-112,575,917 | AX-119282865 |
| LAMA4 | rs146929668 | chr6:112,429,134-112,575,917 | AX-151424688 |
| LAMA4 | rs969138    | chr6:112,429,134-112,575,917 | AX-11700644  |
| LAMA4 | rs73532615  | chr6:112,429,134-112,575,917 | AX-15195037  |
| LAMA4 | rs969139    | chr6:112,429,134-112,575,917 | AX-12666891  |
| LAMA4 | rs11153343  | chr6:112,429,134-112,575,917 | AX-15195044  |
| LAMA4 | rs73532618  | chr6:112,429,134-112,575,917 | AX-15195048  |
| LAMA4 | rs77886563  | chr6:112,429,134-112,575,917 | AX-15195049  |
| LAMA4 | rs58881810  | chr6:112,429,134-112,575,917 | AX-156275983 |
| LAMA4 | rs58881810  | chr6:112,429,134-112,575,917 | AX-156293002 |
| LAMA4 | rs2157550   | chr6:112,429,134-112,575,917 | AX-15195053  |
| LAMA4 | rs66482680  | chr6:112,429,134-112,575,917 | AX-156286139 |
| LAMA4 | rs9387059   | chr6:112,429,134-112,575,917 | AX-15195054  |
| LAMA4 | rs9320393   | chr6:112,429,134-112,575,917 | AX-15195055  |
| LAMA4 | rs34752945  | chr6:112,429,134-112,575,917 | AX-11452386  |
| LAMA4 | rs200754221 | chr6:112,429,134-112,575,917 | AX-92597935  |
| LAMA4 | rs34172193  | chr6:112,429,134-112,575,917 | AX-11442390  |
| LAMA4 | rs9487823   | chr6:112,429,134-112,575,917 | AX-15195059  |
| LAMA4 | rs9320394   | chr6:112,429,134-112,575,917 | AX-15195064  |
| LAMA4 | rs141988342 | chr6:112,429,134-112,575,917 | AX-86602627  |
| LAMA4 | rs138232283 | chr6:112,429,134-112,575,917 | AX-82998154  |
| LAMA4 | rs764587    | chr6:112,429,134-112,575,917 | AX-15195069  |



|       |             |                              |              |
|-------|-------------|------------------------------|--------------|
| LAMA4 | rs3734287   | chr6:112,429,134-112,575,917 | AX-15195071  |
| LAMA4 | rs60125059  | chr6:112,429,134-112,575,917 | AX-15195072  |
| LAMA4 | ---         | chr6:112,429,134-112,575,917 | AX-94359501  |
| LAMA4 | rs117675557 | chr6:112,429,134-112,575,917 | AX-15195073  |
| LAMA4 | rs13191503  | chr6:112,429,134-112,575,917 | AX-41820547  |
| LAMA4 | rs13191507  | chr6:112,429,134-112,575,917 | AX-11243702  |
| LAMA4 | rs145091507 | chr6:112,429,134-112,575,917 | AX-38311795  |
| LAMA4 | rs200187282 | chr6:112,429,134-112,575,917 | AX-156284189 |
| LAMA4 | rs720179    | chr6:112,429,134-112,575,917 | AX-123112886 |
| LAMA4 | rs2345806   | chr6:112,429,134-112,575,917 | AX-123116113 |
| LAMA4 | rs9320395   | chr6:112,429,134-112,575,917 | AX-156275984 |
| LAMA4 | rs9320395   | chr6:112,429,134-112,575,917 | AX-156293003 |
| LAMA4 | rs62413966  | chr6:112,429,134-112,575,917 | AX-15195080  |
| LAMA4 | rs2032565   | chr6:112,429,134-112,575,917 | AX-15195081  |
| LAMA4 | rs2032566   | chr6:112,429,134-112,575,917 | AX-156297021 |
| LAMA4 | rs1050349   | chr6:112,429,134-112,575,917 | AX-15195082  |
| LAMA4 | rs2032567   | chr6:112,429,134-112,575,917 | AX-11361428  |
| LAMA4 | rs2032568   | chr6:112,429,134-112,575,917 | AX-15195084  |
| LAMA4 | rs9487824   | chr6:112,429,134-112,575,917 | AX-11689651  |
| LAMA4 | rs75417684  | chr6:112,429,134-112,575,917 | AX-156275985 |
| LAMA4 | rs75417684  | chr6:112,429,134-112,575,917 | AX-156293004 |
| LAMA4 | rs6924043   | chr6:112,429,134-112,575,917 | AX-15195087  |
| LAMA4 | rs7764213   | chr6:112,429,134-112,575,917 | AX-156275986 |
| LAMA4 | rs7764213   | chr6:112,429,134-112,575,917 | AX-156293005 |
| LAMA4 | rs4947170   | chr6:112,429,134-112,575,917 | AX-41820561  |
| LAMA4 | rs7765769   | chr6:112,429,134-112,575,917 | AX-15195088  |
| LAMA4 | rs142627658 | chr6:112,429,134-112,575,917 | AX-120772060 |
| LAMA4 | rs41289902  | chr6:112,429,134-112,575,917 | AX-11492993  |
| LAMA4 | rs372615994 | chr6:112,429,134-112,575,917 | AX-86678671  |
| LAMA4 | rs2072019   | chr6:112,429,134-112,575,917 | AX-15195090  |
| LAMA4 | rs2072020   | chr6:112,429,134-112,575,917 | AX-15195091  |
| LAMA4 | rs7748075   | chr6:112,429,134-112,575,917 | AX-41820563  |
| LAMA4 | rs1016825   | chr6:112,429,134-112,575,917 | AX-156275987 |
| LAMA4 | rs1016825   | chr6:112,429,134-112,575,917 | AX-156293006 |
| LAMA4 | rs2072026   | chr6:112,429,134-112,575,917 | AX-11365436  |
| LAMA4 | rs35772073  | chr6:112,429,134-112,575,917 | AX-83389632  |
| LAMA4 | rs180931319 | chr6:112,429,134-112,575,917 | AX-83182553  |
| LAMA4 | rs7742931   | chr6:112,429,134-112,575,917 | AX-12638910  |
| LAMA4 | rs73532640  | chr6:112,429,134-112,575,917 | AX-15195096  |
| LAMA4 | rs60600759  | chr6:112,429,134-112,575,917 | AX-148134898 |
| LAMA4 | rs60600759  | chr6:112,429,134-112,575,917 | AX-156283278 |
| LAMA4 | rs763247    | chr6:112,429,134-112,575,917 | AX-35507945  |
| LAMA4 | rs6911058   | chr6:112,429,134-112,575,917 | AX-15195097  |
| LAMA4 | rs744006    | chr6:112,429,134-112,575,917 | AX-15195102  |
| LAMA4 | rs13205383  | chr6:112,429,134-112,575,917 | AX-11244284  |
| LAMA4 | rs28360618  | chr6:112,429,134-112,575,917 | AX-35507947  |
| LAMA4 | rs77129409  | chr6:112,429,134-112,575,917 | AX-119977833 |
| LAMA4 | rs77129409  | chr6:112,429,134-112,575,917 | AX-156285526 |
| LAMA4 | rs3822941   | chr6:112,429,134-112,575,917 | AX-15195103  |
| LAMA4 | rs62413967  | chr6:112,429,134-112,575,917 | AX-15195104  |
| LAMA4 | rs3777942   | chr6:112,429,134-112,575,917 | AX-15195106  |
| LAMA4 | rs13197881  | chr6:112,429,134-112,575,917 | AX-15195107  |
| LAMA4 | rs13198339  | chr6:112,429,134-112,575,917 | AX-35507949  |
| LAMA4 | rs13214535  | chr6:112,429,134-112,575,917 | AX-15195109  |
| LAMA4 | rs73536582  | chr6:112,429,134-112,575,917 | AX-15195112  |

|       |             |                              |              |
|-------|-------------|------------------------------|--------------|
| LAMA4 | rs7775823   | chr6:112,429,134-112,575,917 | AX-156275989 |
| LAMA4 | rs7775823   | chr6:112,429,134-112,575,917 | AX-156293008 |
| LAMA4 | rs147481114 | chr6:112,429,134-112,575,917 | AX-107872025 |
| LAMA4 | rs11969673  | chr6:112,429,134-112,575,917 | AX-148064592 |
| LAMA4 | rs11969673  | chr6:112,429,134-112,575,917 | AX-156282400 |
| LAMA4 | rs12213786  | chr6:112,429,134-112,575,917 | AX-12430612  |
| LAMA4 | rs79611412  | chr6:112,429,134-112,575,917 | AX-120594429 |
| LAMA4 | rs79611412  | chr6:112,429,134-112,575,917 | AX-156282401 |
| LAMA4 | rs202042801 | chr6:112,429,134-112,575,917 | AX-121862424 |
| LAMA4 | rs202042801 | chr6:112,429,134-112,575,917 | AX-156284651 |
| LAMA4 | rs3734286   | chr6:112,429,134-112,575,917 | AX-15195114  |
| LAMA4 | rs146868519 | chr6:112,429,134-112,575,917 | AX-82908102  |
| LAMA4 | rs76951179  | chr6:112,429,134-112,575,917 | AX-15195115  |
| LAMA4 | rs9487828   | chr6:112,429,134-112,575,917 | AX-41820575  |
| LAMA4 | rs117827295 | chr6:112,429,134-112,575,917 | AX-15195116  |
| LAMA4 | rs62413968  | chr6:112,429,134-112,575,917 | AX-15195118  |
| LAMA4 | rs142273488 | chr6:112,429,134-112,575,917 | AX-15195119  |
| LAMA4 | rs142273488 | chr6:112,429,134-112,575,917 | AX-156298535 |
| LAMA4 | rs35470720  | chr6:112,429,134-112,575,917 | AX-15195120  |
| LAMA4 | rs7758334   | chr6:112,429,134-112,575,917 | AX-15195122  |
| LAMA4 | rs9487829   | chr6:112,429,134-112,575,917 | AX-156275990 |
| LAMA4 | rs73536588  | chr6:112,429,134-112,575,917 | AX-15195124  |
| LAMA4 | rs12192292  | chr6:112,429,134-112,575,917 | AX-15195125  |
| LAMA4 | rs76303939  | chr6:112,429,134-112,575,917 | AX-15195126  |
| LAMA4 | rs9487830   | chr6:112,429,134-112,575,917 | AX-41820579  |
| LAMA4 | rs139115761 | chr6:112,429,134-112,575,917 | AX-151431705 |
| LAMA4 | rs59008060  | chr6:112,429,134-112,575,917 | AX-15195130  |
| LAMA4 | rs11153344  | chr6:112,429,134-112,575,917 | AX-11147439  |
| LAMA4 | rs147120087 | chr6:112,429,134-112,575,917 | AX-156285168 |
| LAMA4 | rs9320396   | chr6:112,429,134-112,575,917 | AX-11680870  |
| LAMA4 | rs12196086  | chr6:112,429,134-112,575,917 | AX-15195132  |
| LAMA4 | rs34956253  | chr6:112,429,134-112,575,917 | AX-156298059 |
| LAMA4 | rs201802315 | chr6:112,429,134-112,575,917 | AX-151205877 |
| LAMA4 | rs538726706 | chr6:112,429,134-112,575,917 | AX-86707759  |
| LAMA4 | rs2277084   | chr6:112,429,134-112,575,917 | AX-15195133  |
| LAMA4 | rs143269044 | chr6:112,429,134-112,575,917 | AX-83411311  |
| LAMA4 | ---         | chr6:112,429,134-112,575,917 | AX-94376252  |
| LAMA4 | rs6568719   | chr6:112,429,134-112,575,917 | AX-156275993 |
| LAMA4 | rs6568719   | chr6:112,429,134-112,575,917 | AX-156293012 |
| LAMA4 | rs3798360   | chr6:112,429,134-112,575,917 | AX-35507969  |
| LAMA4 | rs3798359   | chr6:112,429,134-112,575,917 | AX-156275994 |
| LAMA4 | rs3798359   | chr6:112,429,134-112,575,917 | AX-156293013 |
| LAMA4 | rs3798357   | chr6:112,429,134-112,575,917 | AX-15195135  |
| LAMA4 | rs12200170  | chr6:112,429,134-112,575,917 | AX-148190001 |
| LAMA4 | rs34449915  | chr6:112,429,134-112,575,917 | AX-156297947 |
| LAMA4 | rs34449915  | chr6:112,429,134-112,575,917 | AX-35507977  |
| LAMA4 | rs2227237   | chr6:112,429,134-112,575,917 | AX-156282402 |
| LAMA4 | rs2227237   | chr6:112,429,134-112,575,917 | AX-156297022 |
| LAMA4 | rs2213838   | chr6:112,429,134-112,575,917 | AX-35507979  |
| LAMA4 | rs7739355   | chr6:112,429,134-112,575,917 | AX-11642242  |
| LAMA4 | rs3752577   | chr6:112,429,134-112,575,917 | AX-11478212  |
| LAMA4 | rs201962680 | chr6:112,429,134-112,575,917 | AX-151222587 |
| LAMA4 | rs35776093  | chr6:112,429,134-112,575,917 | AX-122237151 |
| LAMA4 | rs35776093  | chr6:112,429,134-112,575,917 | AX-38311811  |
| LAMA4 | ---         | chr6:112,429,134-112,575,917 | AX-151121970 |

|       |             |                              |              |
|-------|-------------|------------------------------|--------------|
| LAMA4 | rs9487832   | chr6:112,429,134-112,575,917 | AX-35507993  |
| LAMA4 | rs9487833   | chr6:112,429,134-112,575,917 | AX-15195145  |
| LAMA4 | rs9487834   | chr6:112,429,134-112,575,917 | AX-35507995  |
| LAMA4 | rs7739729   | chr6:112,429,134-112,575,917 | AX-41820591  |
| LAMA4 | rs2282852   | chr6:112,429,134-112,575,917 | AX-41820593  |
| LAMA4 | ---         | chr6:112,429,134-112,575,917 | AX-113354342 |
| LAMA4 | ---         | chr6:112,429,134-112,575,917 | AX-156293014 |
| LAMA4 | rs78366040  | chr6:112,429,134-112,575,917 | AX-35507999  |
| LAMA4 | rs6913656   | chr6:112,429,134-112,575,917 | AX-41820597  |
| LAMA4 | rs9320398   | chr6:112,429,134-112,575,917 | AX-148017270 |
| LAMA4 | rs9320398   | chr6:112,429,134-112,575,917 | AX-153828158 |
| LAMA4 | rs12201150  | chr6:112,429,134-112,575,917 | AX-147985620 |
| LAMA4 | rs9487835   | chr6:112,429,134-112,575,917 | AX-35508003  |
| LAMA4 | rs6919131   | chr6:112,429,134-112,575,917 | AX-15195147  |
| LAMA4 | rs763246    | chr6:112,429,134-112,575,917 | AX-151111484 |
| LAMA4 | rs763246    | chr6:112,429,134-112,575,917 | AX-156275996 |
| LAMA4 | rs5879140   | chr6:112,429,134-112,575,917 | AX-122079796 |
| LAMA4 | rs5879140   | chr6:112,429,134-112,575,917 | AX-156285085 |
| LAMA4 | rs1060515   | chr6:112,429,134-112,575,917 | AX-119943693 |
| LAMA4 | rs1060515   | chr6:112,429,134-112,575,917 | AX-123107050 |
| LAMA4 | rs7766236   | chr6:112,429,134-112,575,917 | AX-11644108  |
| LAMA4 | rs17073430  | chr6:112,429,134-112,575,917 | AX-41820601  |
| LAMA4 | rs138153075 | chr6:112,429,134-112,575,917 | AX-83069603  |
| LAMA4 | rs143587921 | chr6:112,429,134-112,575,917 | AX-83356297  |
| LAMA4 | rs113345234 | chr6:112,429,134-112,575,917 | AX-156293015 |
| LAMA4 | rs971402    | chr6:112,429,134-112,575,917 | AX-12667071  |
| LAMA4 | rs971403    | chr6:112,429,134-112,575,917 | AX-11701043  |
| LAMA4 | rs971404    | chr6:112,429,134-112,575,917 | AX-12667072  |
| LAMA4 | rs971405    | chr6:112,429,134-112,575,917 | AX-41820607  |
| LAMA4 | rs11961480  | chr6:112,429,134-112,575,917 | AX-15195153  |
| LAMA4 | rs11963821  | chr6:112,429,134-112,575,917 | AX-148778790 |
| LAMA4 | rs11963821  | chr6:112,429,134-112,575,917 | AX-92487023  |
| LAMA4 | rs11968750  | chr6:112,429,134-112,575,917 | AX-122452610 |
| LAMA4 | rs11968750  | chr6:112,429,134-112,575,917 | AX-149272758 |
| LAMA4 | rs183462896 | chr6:112,429,134-112,575,917 | AX-105132129 |
| LAMA4 | rs11963846  | chr6:112,429,134-112,575,917 | AX-15195157  |
| LAMA4 | rs2051649   | chr6:112,429,134-112,575,917 | AX-11363372  |
| LAMA4 | rs6940879   | chr6:112,429,134-112,575,917 | AX-11595945  |
| LAMA4 | rs9387060   | chr6:112,429,134-112,575,917 | AX-11684910  |
| LAMA4 | rs1050348   | chr6:112,429,134-112,575,917 | AX-11112638  |
| LAMA4 | rs12210552  | chr6:112,429,134-112,575,917 | AX-35508021  |
| LAMA4 | rs77199140  | chr6:112,429,134-112,575,917 | AX-35508023  |
| LAMA4 | rs2345807   | chr6:112,429,134-112,575,917 | AX-35508027  |
| LAMA4 | rs56227047  | chr6:112,429,134-112,575,917 | AX-11682093  |
| LAMA4 | rs6917024   | chr6:112,429,134-112,575,917 | AX-15195177  |
| LAMA4 | rs73766947  | chr6:112,429,134-112,575,917 | AX-15195178  |
| LAMA4 | rs6917763   | chr6:112,429,134-112,575,917 | AX-11594265  |
| LAMA4 | ---         | chr6:112,429,134-112,575,917 | AX-94376253  |
| LAMA4 | rs73538516  | chr6:112,429,134-112,575,917 | AX-15195180  |
| LAMA4 | rs9398298   | chr6:112,429,134-112,575,917 | AX-15195181  |
| LAMA4 | rs9398299   | chr6:112,429,134-112,575,917 | AX-15195183  |
| LAMA4 | rs2157544   | chr6:112,429,134-112,575,917 | AX-15195184  |
| LAMA4 | rs2157545   | chr6:112,429,134-112,575,917 | AX-15195185  |
| LAMA4 | rs3777935   | chr6:112,429,134-112,575,917 | AX-15195186  |
| LAMA4 | rs73766949  | chr6:112,429,134-112,575,917 | AX-156275999 |

|       |             |                              |              |
|-------|-------------|------------------------------|--------------|
| LAMA4 | rs73766949  | chr6:112,429,134-112,575,917 | AX-156293016 |
| LAMA4 | rs9487839   | chr6:112,429,134-112,575,917 | AX-156276000 |
| LAMA4 | rs9400520   | chr6:112,429,134-112,575,917 | AX-156276001 |
| LAMA4 | rs7757339   | chr6:112,429,134-112,575,917 | AX-156276002 |
| LAMA4 | rs7757339   | chr6:112,429,134-112,575,917 | AX-156293017 |
| LAMA4 | rs7757340   | chr6:112,429,134-112,575,917 | AX-156276003 |
| LAMA4 | rs6568720   | chr6:112,429,134-112,575,917 | AX-11572610  |
| LAMA4 | rs2213839   | chr6:112,429,134-112,575,917 | AX-15195191  |
| LAMA4 | rs6568721   | chr6:112,429,134-112,575,917 | AX-15195192  |
| LAMA4 | rs6899453   | chr6:112,429,134-112,575,917 | AX-15195195  |
| LAMA4 | rs1158747   | chr6:112,429,134-112,575,917 | AX-15195196  |
| LAMA4 | rs7752846   | chr6:112,429,134-112,575,917 | AX-15195198  |
| LAMA4 | rs7752759   | chr6:112,429,134-112,575,917 | AX-15195199  |
| LAMA4 | rs4947172   | chr6:112,429,134-112,575,917 | AX-41820629  |
| LAMA4 | rs929124    | chr6:112,429,134-112,575,917 | AX-156297023 |
| LAMA4 | rs79223854  | chr6:112,429,134-112,575,917 | AX-15195200  |
| LAMA4 | rs73766951  | chr6:112,429,134-112,575,917 | AX-15195204  |
| LAMA4 | rs6926862   | chr6:112,429,134-112,575,917 | AX-41820633  |
| LAMA4 | rs6907109   | chr6:112,429,134-112,575,917 | AX-41820635  |
| LAMA4 | rs4526233   | chr6:112,429,134-112,575,917 | AX-148142798 |
| LAMA4 | rs4526233   | chr6:112,429,134-112,575,917 | AX-92512163  |
| LAMA4 | rs4469330   | chr6:112,429,134-112,575,917 | AX-15195205  |
| LAMA4 | rs58039820  | chr6:112,429,134-112,575,917 | AX-156276004 |
| LAMA4 | rs58039820  | chr6:112,429,134-112,575,917 | AX-156293019 |
| LAMA4 | rs3777934   | chr6:112,429,134-112,575,917 | AX-41820637  |
| LAMA4 | rs1894681   | chr6:112,429,134-112,575,917 | AX-15195207  |
| LAMA4 | rs12192658  | chr6:112,429,134-112,575,917 | AX-11194895  |
| LAMA4 | rs17073485  | chr6:112,429,134-112,575,917 | AX-15195209  |
| LAMA4 | rs10872076  | chr6:112,429,134-112,575,917 | AX-11184088  |
| LAMA4 | rs10872076  | chr6:112,429,134-112,575,917 | AX-122876931 |
| LAMA4 | rs73764703  | chr6:112,429,134-112,575,917 | AX-156276005 |
| LAMA4 | rs73764703  | chr6:112,429,134-112,575,917 | AX-156293020 |
| LAMA4 | rs73538594  | chr6:112,429,134-112,575,917 | AX-15195212  |
| LAMA4 | rs17823433  | chr6:112,429,134-112,575,917 | AX-12505528  |
| LAMA4 | rs9481229   | chr6:112,429,134-112,575,917 | AX-35508069  |
| LAMA4 | rs9374309   | chr6:112,429,134-112,575,917 | AX-15195218  |
| LAMA4 | rs6908219   | chr6:112,429,134-112,575,917 | AX-11593606  |
| LAMA4 | rs2301512   | chr6:112,429,134-112,575,917 | AX-156276006 |
| LAMA4 | rs2301512   | chr6:112,429,134-112,575,917 | AX-156293021 |
| LAMA4 | rs2301513   | chr6:112,429,134-112,575,917 | AX-15195220  |
| LAMA4 | rs2301514   | chr6:112,429,134-112,575,917 | AX-156293022 |
| LAMA4 | rs9400521   | chr6:112,429,134-112,575,917 | AX-35508075  |
| LAMA4 | rs74928940  | chr6:112,429,134-112,575,917 | AX-15195224  |
| LAMA4 | rs6938044   | chr6:112,429,134-112,575,917 | AX-15195225  |
| LAMA4 | rs116042905 | chr6:112,429,134-112,575,917 | AX-156276008 |
| LAMA4 | rs116042905 | chr6:112,429,134-112,575,917 | AX-156293023 |
| LAMA4 | rs17073495  | chr6:112,429,134-112,575,917 | AX-41820649  |
| LAMA4 | rs9387061   | chr6:112,429,134-112,575,917 | AX-85015220  |
| LAMA4 | rs9387061   | chr6:112,429,134-112,575,917 | AX-88783738  |
| LAMA4 | ---         | chr6:112,429,134-112,575,917 | AX-91988579  |
| LAMA4 | ---         | chr6:112,429,134-112,575,917 | AX-92009974  |
| LAMA4 | rs75357508  | chr6:112,429,134-112,575,917 | AX-15195227  |
| LAMA4 | rs56982552  | chr6:112,429,134-112,575,917 | AX-156276009 |
| LAMA4 | rs56982552  | chr6:112,429,134-112,575,917 | AX-156293024 |
| LAMA4 | rs79730073  | chr6:112,429,134-112,575,917 | AX-35508087  |

|       |             |                              |              |
|-------|-------------|------------------------------|--------------|
| LAMA4 | rs114753589 | chr6:112,429,134-112,575,917 | AX-156282404 |
| LAMA4 | rs114753589 | chr6:112,429,134-112,575,917 | AX-156297024 |
| LAMA4 | ---         | chr6:112,429,134-112,575,917 | AX-94355636  |
| LAMA4 | rs2072029   | chr6:112,429,134-112,575,917 | AX-15195232  |
| LAMA4 | rs116799545 | chr6:112,429,134-112,575,917 | AX-156276010 |
| LAMA4 | rs116799545 | chr6:112,429,134-112,575,917 | AX-156293025 |
| LAMA4 | rs6901052   | chr6:112,429,134-112,575,917 | AX-15195234  |
| LAMA4 | rs764071    | chr6:112,429,134-112,575,917 | AX-35508101  |
| LAMA4 | rs2269646   | chr6:112,429,134-112,575,917 | AX-15195235  |
| LAMA4 | rs9487840   | chr6:112,429,134-112,575,917 | AX-148298295 |
| LAMA4 | rs9487840   | chr6:112,429,134-112,575,917 | AX-148678404 |
| LAMA4 | rs7745663   | chr6:112,429,134-112,575,917 | AX-35508105  |
| LAMA4 | rs2072021   | chr6:112,429,134-112,575,917 | AX-12516417  |
| LAMA4 | ---         | chr6:112,429,134-112,575,917 | AX-94372387  |
| LAMA4 | rs2072022   | chr6:112,429,134-112,575,917 | AX-11365434  |
| LAMA4 | rs2072023   | chr6:112,429,134-112,575,917 | AX-41820651  |
| LAMA4 | rs2237237   | chr6:112,429,134-112,575,917 | AX-15195241  |
| LAMA4 | rs11434202  | chr6:112,429,134-112,575,917 | AX-122472642 |
| LAMA4 | rs2237238   | chr6:112,429,134-112,575,917 | AX-15195243  |
| LAMA4 | rs2237239   | chr6:112,429,134-112,575,917 | AX-156276011 |
| LAMA4 | rs2237240   | chr6:112,429,134-112,575,917 | AX-120763607 |
| LAMA4 | rs3777932   | chr6:112,429,134-112,575,917 | AX-15195247  |
| LAMA4 | rs6930838   | chr6:112,429,134-112,575,917 | AX-156276012 |
| LAMA4 | rs6930838   | chr6:112,429,134-112,575,917 | AX-156293028 |
| LAMA4 | rs9487841   | chr6:112,429,134-112,575,917 | AX-156276013 |
| LAMA4 | rs3777930   | chr6:112,429,134-112,575,917 | AX-15195249  |
| LAMA4 | rs3777929   | chr6:112,429,134-112,575,917 | AX-12561031  |
| LAMA4 | rs3777928   | chr6:112,429,134-112,575,917 | AX-11479973  |
| LAMA4 | rs6568723   | chr6:112,429,134-112,575,917 | AX-12602978  |
| LAMA4 | rs6568724   | chr6:112,429,134-112,575,917 | AX-15195251  |
| LAMA4 | rs200286621 | chr6:112,429,134-112,575,917 | AX-151126030 |
| LAMA4 | rs11757069  | chr6:112,429,134-112,575,917 | AX-156276014 |
| LAMA4 | rs11757069  | chr6:112,429,134-112,575,917 | AX-156293030 |
| LAMA4 | rs9487842   | chr6:112,429,134-112,575,917 | AX-156276015 |
| LAMA4 | rs9487842   | chr6:112,429,134-112,575,917 | AX-156293031 |
| LAMA4 | rs4947174   | chr6:112,429,134-112,575,917 | AX-156293033 |
| LAMA4 | rs7758871   | chr6:112,429,134-112,575,917 | AX-15195252  |
| LAMA4 | rs7738951   | chr6:112,429,134-112,575,917 | AX-15195254  |
| LAMA4 | rs11153345  | chr6:112,429,134-112,575,917 | AX-41820659  |
| LAMA4 | rs62413990  | chr6:112,429,134-112,575,917 | AX-15195257  |
| LAMA4 | rs6912145   | chr6:112,429,134-112,575,917 | AX-15195260  |
| LAMA4 | rs2157546   | chr6:112,429,134-112,575,917 | AX-15195262  |
| LAMA4 | rs3948760   | chr6:112,429,134-112,575,917 | AX-41820661  |
| LAMA4 | rs4947175   | chr6:112,429,134-112,575,917 | AX-15195263  |
| LAMA4 | rs4945898   | chr6:112,429,134-112,575,917 | AX-15195264  |
| LAMA4 | rs2237241   | chr6:112,429,134-112,575,917 | AX-15195266  |
| LAMA4 | rs115769014 | chr6:112,429,134-112,575,917 | AX-15195269  |
| LAMA4 | rs2237242   | chr6:112,429,134-112,575,917 | AX-41820665  |
| LAMA4 | ---         | chr6:112,429,134-112,575,917 | AX-86685336  |
| LAMA4 | rs4947176   | chr6:112,429,134-112,575,917 | AX-15195270  |
| LAMA4 | ---         | chr6:112,429,134-112,575,917 | AX-147989553 |
| LAMA4 | ---         | chr6:112,429,134-112,575,917 | AX-156276018 |
| LAMA4 | rs6935374   | chr6:112,429,134-112,575,917 | AX-114067398 |
| LAMA4 | rs6935374   | chr6:112,429,134-112,575,917 | AX-156283279 |
| LAMA4 | rs6915838   | chr6:112,429,134-112,575,917 | AX-15195273  |

|       |             |                              |              |
|-------|-------------|------------------------------|--------------|
| LAMA4 | rs9487846   | chr6:112,429,134-112,575,917 | AX-41820667  |
| LAMA4 | rs11757455  | chr6:112,429,134-112,575,917 | AX-11173195  |
| LAMA4 | rs4947177   | chr6:112,429,134-112,575,917 | AX-12586878  |
| LAMA4 | rs4947178   | chr6:112,429,134-112,575,917 | AX-41820671  |
| LAMA4 | rs6926485   | chr6:112,429,134-112,575,917 | AX-41820673  |
| LAMA4 | rs6904691   | chr6:112,429,134-112,575,917 | AX-156276019 |
| LAMA4 | rs6904691   | chr6:112,429,134-112,575,917 | AX-156293034 |
| LAMA4 | rs6904212   | chr6:112,429,134-112,575,917 | AX-123092076 |
| LAMA4 | rs2237243   | chr6:112,429,134-112,575,917 | AX-107717418 |
| LAMA4 | rs2237243   | chr6:112,429,134-112,575,917 | AX-156293035 |
| LAMA4 | rs80310126  | chr6:112,429,134-112,575,917 | AX-15195278  |
| LAMA4 | rs74977957  | chr6:112,429,134-112,575,917 | AX-15195279  |
| LAMA4 | rs9374311   | chr6:112,429,134-112,575,917 | AX-11683973  |
| LAMA4 | rs2237244   | chr6:112,429,134-112,575,917 | AX-11377332  |
| LAMA4 | rs9398301   | chr6:112,429,134-112,575,917 | AX-11685756  |
| LAMA4 | rs57700212  | chr6:112,429,134-112,575,917 | AX-156286143 |
| LAMA4 | rs57432793  | chr6:112,429,134-112,575,917 | AX-156276020 |
| LAMA4 | rs60315490  | chr6:112,429,134-112,575,917 | AX-15195281  |
| LAMA4 | rs2237245   | chr6:112,429,134-112,575,917 | AX-51283308  |
| LAMA4 | rs11413588  | chr6:112,429,134-112,575,917 | AX-11156669  |
| LAMA4 | rs201712365 | chr6:112,429,134-112,575,917 | AX-151365842 |
| LAMA4 | rs201712365 | chr6:112,429,134-112,575,917 | AX-156297727 |
| LAMA4 | rs10585917  | chr6:112,429,134-112,575,917 | AX-151356844 |
| LAMA4 | rs138554247 | chr6:112,429,134-112,575,917 | AX-151355712 |
| LAMA4 | rs138554247 | chr6:112,429,134-112,575,917 | AX-15195283  |
| LAMA4 | rs6939619   | chr6:112,429,134-112,575,917 | AX-41820681  |
| LAMA4 | rs6916501   | chr6:112,429,134-112,575,917 | AX-156276021 |
| LAMA4 | rs6916501   | chr6:112,429,134-112,575,917 | AX-156293036 |
| LAMA4 | rs74760631  | chr6:112,429,134-112,575,917 | AX-15195285  |
| LAMA4 | rs6917160   | chr6:112,429,134-112,575,917 | AX-41820685  |
| LAMA4 | rs6916694   | chr6:112,429,134-112,575,917 | AX-41820687  |
| LAMA4 | rs3777925   | chr6:112,429,134-112,575,917 | AX-11479972  |
| LAMA4 | rs6939808   | chr6:112,429,134-112,575,917 | AX-41820689  |
| LAMA4 | rs59596549  | chr6:112,429,134-112,575,917 | AX-15195286  |
| LAMA4 | rs7754329   | chr6:112,429,134-112,575,917 | AX-11643287  |
| LAMA4 | rs59690635  | chr6:112,429,134-112,575,917 | AX-15195287  |
| LAMA4 | rs67517586  | chr6:112,429,134-112,575,917 | AX-151355663 |
| LAMA4 | rs67517586  | chr6:112,429,134-112,575,917 | AX-156298640 |
| LAMA4 | rs140099023 | chr6:112,429,134-112,575,917 | AX-151355671 |
| LAMA4 | rs140099023 | chr6:112,429,134-112,575,917 | AX-156297984 |
| LAMA4 | rs77748844  | chr6:112,429,134-112,575,917 | AX-35508141  |
| LAMA4 | rs73542519  | chr6:112,429,134-112,575,917 | AX-15195291  |
| LAMA4 | rs140805629 | chr6:112,429,134-112,575,917 | AX-151459779 |
| LAMA4 | rs73542521  | chr6:112,429,134-112,575,917 | AX-15195292  |
| LAMA4 | rs73542523  | chr6:112,429,134-112,575,917 | AX-15195293  |
| LAMA4 | rs73542524  | chr6:112,429,134-112,575,917 | AX-15195294  |
| LAMA4 | rs73542527  | chr6:112,429,134-112,575,917 | AX-15195295  |
| LAMA4 | rs73542530  | chr6:112,429,134-112,575,917 | AX-15195297  |
| LAMA4 | rs17073562  | chr6:112,429,134-112,575,917 | AX-15195298  |
| LAMA4 | rs73542534  | chr6:112,429,134-112,575,917 | AX-15195299  |
| LAMA4 | rs73542539  | chr6:112,429,134-112,575,917 | AX-156276022 |
| LAMA4 | rs73542539  | chr6:112,429,134-112,575,917 | AX-156293037 |
| LAMA4 | rs73542543  | chr6:112,429,134-112,575,917 | AX-15195300  |
| LAMA4 | rs73542545  | chr6:112,429,134-112,575,917 | AX-35508147  |
| LAMA4 | rs17073563  | chr6:112,429,134-112,575,917 | AX-41820691  |

|       |             |                              |              |
|-------|-------------|------------------------------|--------------|
| LAMA4 | rs12190908  | chr6:112,429,134-112,575,917 | AX-11194779  |
| LAMA4 | rs77759681  | chr6:112,429,134-112,575,917 | AX-15195301  |
| LAMA4 | rs77329639  | chr6:112,429,134-112,575,917 | AX-15195302  |
| LAMA4 | rs73542549  | chr6:112,429,134-112,575,917 | AX-15195303  |
| LAMA4 | rs138176093 | chr6:112,429,134-112,575,917 | AX-83492439  |
| LAMA4 | rs17073565  | chr6:112,429,134-112,575,917 | AX-41820693  |
| LAMA4 | rs2239849   | chr6:112,429,134-112,575,917 | AX-12522319  |
| LAMA4 | rs6909615   | chr6:112,429,134-112,575,917 | AX-11593702  |
| LAMA4 | rs73542553  | chr6:112,429,134-112,575,917 | AX-15195304  |
| LAMA4 | rs17073566  | chr6:112,429,134-112,575,917 | AX-41820695  |
| LAMA4 | rs75956673  | chr6:112,429,134-112,575,917 | AX-15195305  |
| LAMA4 | rs73542558  | chr6:112,429,134-112,575,917 | AX-15195306  |
| LAMA4 | rs73542561  | chr6:112,429,134-112,575,917 | AX-15195307  |
| LAMA4 | rs9487847   | chr6:112,429,134-112,575,917 | AX-15195308  |
| LAMA4 | rs17073570  | chr6:112,429,134-112,575,917 | AX-41820697  |
| LAMA4 | rs147329384 | chr6:112,429,134-112,575,917 | AX-151285642 |
| LAMA4 | rs17073572  | chr6:112,429,134-112,575,917 | AX-11303612  |
| LAMA4 | rs2237246   | chr6:112,429,134-112,575,917 | AX-11377333  |
| LAMA4 | rs2237247   | chr6:112,429,134-112,575,917 | AX-12522161  |
| LAMA4 | rs17073574  | chr6:112,429,134-112,575,917 | AX-15195311  |
| LAMA4 | rs6921607   | chr6:112,429,134-112,575,917 | AX-12614387  |
| LAMA4 | rs2282853   | chr6:112,429,134-112,575,917 | AX-15195314  |
| LAMA4 | rs113210444 | chr6:112,429,134-112,575,917 | AX-148825784 |
| LAMA4 | rs113210444 | chr6:112,429,134-112,575,917 | AX-156283280 |
| LAMA4 | rs9487850   | chr6:112,429,134-112,575,917 | AX-148176049 |
| LAMA4 | rs9487850   | chr6:112,429,134-112,575,917 | AX-156276023 |
| LAMA4 | rs9487851   | chr6:112,429,134-112,575,917 | AX-148105273 |
| LAMA4 | rs9487851   | chr6:112,429,134-112,575,917 | AX-156276024 |
| LAMA4 | rs73764707  | chr6:112,429,134-112,575,917 | AX-15195320  |
| LAMA4 | rs17073584  | chr6:112,429,134-112,575,917 | AX-41820703  |
| LAMA4 | rs60571526  | chr6:112,429,134-112,575,917 | AX-15195322  |
| LAMA4 | rs11153346  | chr6:112,429,134-112,575,917 | AX-107738859 |
| LAMA4 | rs11153346  | chr6:112,429,134-112,575,917 | AX-156297026 |
| LAMA4 | rs4945899   | chr6:112,429,134-112,575,917 | AX-11537982  |
| LAMA4 | rs73764709  | chr6:112,429,134-112,575,917 | AX-15195323  |
| LAMA4 | rs34072237  | chr6:112,429,134-112,575,917 | AX-11440686  |
| LAMA4 | rs12198087  | chr6:112,429,134-112,575,917 | AX-11195297  |
| LAMA4 | rs73544339  | chr6:112,429,134-112,575,917 | AX-156293038 |
| LAMA4 | rs73544339  | chr6:112,429,134-112,575,917 | AX-84922494  |
| LAMA4 | rs28360619  | chr6:112,429,134-112,575,917 | AX-11414670  |
| LAMA4 | rs75992359  | chr6:112,429,134-112,575,917 | AX-15195328  |
| LAMA4 | rs78278111  | chr6:112,429,134-112,575,917 | AX-156276025 |
| LAMA4 | rs78278111  | chr6:112,429,134-112,575,917 | AX-156293039 |
| LAMA4 | rs9374312   | chr6:112,429,134-112,575,917 | AX-11683974  |
| LAMA4 | rs11435641  | chr6:112,429,134-112,575,917 | AX-121888412 |
| LAMA4 | rs11435641  | chr6:112,429,134-112,575,917 | AX-156293040 |
| LAMA4 | rs2213840   | chr6:112,429,134-112,575,917 | AX-11375566  |
| LAMA4 | rs73764712  | chr6:112,429,134-112,575,917 | AX-15195332  |
| LAMA4 | rs73764713  | chr6:112,429,134-112,575,917 | AX-15195335  |
| LAMA4 | rs2068770   | chr6:112,429,134-112,575,917 | AX-15195336  |
| LAMA4 | rs35349917  | chr6:112,429,134-112,575,917 | AX-41820711  |
| LAMA4 | rs7763270   | chr6:112,429,134-112,575,917 | AX-41820713  |
| LAMA4 | rs9487853   | chr6:112,429,134-112,575,917 | AX-15195338  |
| LAMA4 | rs2237248   | chr6:112,429,134-112,575,917 | AX-12522162  |
| LAMA4 | rs2237249   | chr6:112,429,134-112,575,917 | AX-15195339  |

|       |             |                              |              |
|-------|-------------|------------------------------|--------------|
| LAMA4 | rs73764715  | chr6:112,429,134-112,575,917 | AX-15195340  |
| LAMA4 | rs140359426 | chr6:112,429,134-112,575,917 | AX-122403091 |
| LAMA4 | rs2345808   | chr6:112,429,134-112,575,917 | AX-15195346  |
| LAMA4 | rs2157547   | chr6:112,429,134-112,575,917 | AX-15195348  |
| LAMA4 | rs73764716  | chr6:112,429,134-112,575,917 | AX-15195349  |
| LAMA4 | rs12111523  | chr6:112,429,134-112,575,917 | AX-15195352  |
| LAMA4 | rs7450379   | chr6:112,429,134-112,575,917 | AX-11625117  |
| LAMA4 | rs58543421  | chr6:112,429,134-112,575,917 | AX-15195355  |
| LAMA4 | rs2345809   | chr6:112,429,134-112,575,917 | AX-35508205  |
| LAMA4 | rs73764717  | chr6:112,429,134-112,575,917 | AX-15195357  |
| LAMA4 | rs2157548   | chr6:112,429,134-112,575,917 | AX-12519139  |
| LAMA4 | rs2157548   | chr6:112,429,134-112,575,917 | AX-156276026 |
| LAMA4 | rs75022233  | chr6:112,429,134-112,575,917 | AX-15195358  |
| LAMA4 | rs9387063   | chr6:112,429,134-112,575,917 | AX-11684911  |
| LAMA4 | rs77652041  | chr6:112,429,134-112,575,917 | AX-15195360  |
| LAMA4 | rs6900576   | chr6:112,429,134-112,575,917 | AX-148222290 |
| LAMA4 | rs6900576   | chr6:112,429,134-112,575,917 | AX-148391767 |
| LAMA4 | rs140424860 | chr6:112,429,134-112,575,917 | AX-122132569 |
| LAMA4 | rs140424860 | chr6:112,429,134-112,575,917 | AX-156283281 |
| LAMA4 | rs150011219 | chr6:112,429,134-112,575,917 | AX-148924087 |
| LAMA4 | rs150011219 | chr6:112,429,134-112,575,917 | AX-149056379 |
| LAMA4 | rs12661406  | chr6:112,429,134-112,575,917 | AX-41820735  |
| LAMA4 | rs11153347  | chr6:112,429,134-112,575,917 | AX-41820737  |
| LAMA4 | rs1006497   | chr6:112,429,134-112,575,917 | AX-15195362  |
| LAMA4 | rs2345810   | chr6:112,429,134-112,575,917 | AX-15195367  |
| LAMA4 | rs145415561 | chr6:112,429,134-112,575,917 | AX-107726849 |
| LAMA4 | rs145415561 | chr6:112,429,134-112,575,917 | AX-156297879 |
| LAMA4 | rs4947179   | chr6:112,429,134-112,575,917 | AX-11538072  |
| LAMA4 | rs9320400   | chr6:112,429,134-112,575,917 | AX-15195369  |
| LAMA4 | rs9487857   | chr6:112,429,134-112,575,917 | AX-15195372  |
| LAMA4 | rs9487858   | chr6:112,429,134-112,575,917 | AX-156276027 |
| LAMA4 | rs9487858   | chr6:112,429,134-112,575,917 | AX-156293041 |
| LAMA4 | rs73764718  | chr6:112,429,134-112,575,917 | AX-15195373  |
| LAMA4 | rs73764719  | chr6:112,429,134-112,575,917 | AX-15195375  |
| LAMA4 | rs78532275  | chr6:112,429,134-112,575,917 | AX-35508243  |
| LAMA4 | rs75558316  | chr6:112,429,134-112,575,917 | AX-15195381  |
| LAMA4 | rs6568726   | chr6:112,429,134-112,575,917 | AX-41820747  |
| LAMA4 | rs80110510  | chr6:112,429,134-112,575,917 | AX-15195382  |
| LAMA4 | rs6906525   | chr6:112,429,134-112,575,917 | AX-156276028 |
| LAMA4 | rs6906525   | chr6:112,429,134-112,575,917 | AX-156293042 |
| LAMA4 | rs58986775  | chr6:112,429,134-112,575,917 | AX-15195384  |
| LAMA4 | rs73764720  | chr6:112,429,134-112,575,917 | AX-35508247  |
| LAMA4 | rs60955874  | chr6:112,429,134-112,575,917 | AX-15195385  |
| LAMA4 | rs9481237   | chr6:112,429,134-112,575,917 | AX-41820753  |
| LAMA4 | rs73764721  | chr6:112,429,134-112,575,917 | AX-15195388  |
| LAMA4 | rs7764836   | chr6:112,429,134-112,575,917 | AX-15195391  |
| LAMA4 | rs28360620  | chr6:112,429,134-112,575,917 | AX-15195396  |
| LAMA4 | rs9398302   | chr6:112,429,134-112,575,917 | AX-11685757  |
| LAMA4 | rs73764722  | chr6:112,429,134-112,575,917 | AX-15195398  |
| LAMA4 | rs12206703  | chr6:112,429,134-112,575,917 | AX-41820761  |
| LAMA4 | rs73764723  | chr6:112,429,134-112,575,917 | AX-15195400  |
| LAMA4 | rs12206921  | chr6:112,429,134-112,575,917 | AX-12430426  |
| LAMA4 | rs7775097   | chr6:112,429,134-112,575,917 | AX-41820763  |
| LAMA4 | rs4947180   | chr6:112,429,134-112,575,917 | AX-120394958 |
| LAMA4 | rs1573756   | chr6:112,429,134-112,575,917 | AX-15195402  |



|       |             |                              |              |
|-------|-------------|------------------------------|--------------|
| LAMA4 | rs9487860   | chr6:112,429,134-112,575,917 | AX-156276030 |
| LAMA4 | rs9487860   | chr6:112,429,134-112,575,917 | AX-156293043 |
| LAMA4 | rs9487861   | chr6:112,429,134-112,575,917 | AX-11689653  |
| LAMA4 | rs2072024   | chr6:112,429,134-112,575,917 | AX-11365435  |
| LAMA4 | rs9481239   | chr6:112,429,134-112,575,917 | AX-153825375 |
| LAMA4 | rs9481239   | chr6:112,429,134-112,575,917 | AX-156293044 |
| LAMA4 | rs9481240   | chr6:112,429,134-112,575,917 | AX-122977004 |
| LAMA4 | rs73764724  | chr6:112,429,134-112,575,917 | AX-35508257  |
| LAMA4 | rs9487862   | chr6:112,429,134-112,575,917 | AX-156276031 |
| LAMA4 | rs9487862   | chr6:112,429,134-112,575,917 | AX-96692701  |
| LAMA4 | rs74688603  | chr6:112,429,134-112,575,917 | AX-148650686 |
| LAMA4 | rs74688603  | chr6:112,429,134-112,575,917 | AX-156283282 |
| LAMA4 | rs113792282 | chr6:112,429,134-112,575,917 | AX-148422303 |
| LAMA4 | rs113792282 | chr6:112,429,134-112,575,917 | AX-156283283 |
| LAMA4 | rs62414016  | chr6:112,429,134-112,575,917 | AX-35508259  |
| LAMA4 | rs2051651   | chr6:112,429,134-112,575,917 | AX-120209236 |
| LAMA4 | rs2051651   | chr6:112,429,134-112,575,917 | AX-156293045 |
| LAMA4 | rs35006512  | chr6:112,429,134-112,575,917 | AX-156276032 |
| LAMA4 | rs17073600  | chr6:112,429,134-112,575,917 | AX-156276033 |
| LAMA4 | rs17073600  | chr6:112,429,134-112,575,917 | AX-156293046 |
| LAMA4 | rs60697308  | chr6:112,429,134-112,575,917 | AX-148103414 |
| LAMA4 | rs60697308  | chr6:112,429,134-112,575,917 | AX-148497866 |
| LAMA4 | ---         | chr6:112,429,134-112,575,917 | AX-148496073 |
| LAMA4 | ---         | chr6:112,429,134-112,575,917 | AX-156283284 |
| LAMA4 | rs6926573   | chr6:112,429,134-112,575,917 | AX-41820773  |
| LAMA4 | rs6909113   | chr6:112,429,134-112,575,917 | AX-148317403 |
| LAMA4 | rs6909113   | chr6:112,429,134-112,575,917 | AX-149519030 |
| LAMA4 | rs62414019  | chr6:112,429,134-112,575,917 | AX-156283285 |
| LAMA4 | rs62414019  | chr6:112,429,134-112,575,917 | AX-88319044  |
| LAMA4 | rs62414020  | chr6:112,429,134-112,575,917 | AX-151258456 |
| LAMA4 | rs62414020  | chr6:112,429,134-112,575,917 | AX-156276034 |
| LAMA4 | rs5879143   | chr6:112,429,134-112,575,917 | AX-120745698 |
| LAMA4 | rs5879143   | chr6:112,429,134-112,575,917 | AX-156293048 |
| LAMA4 | rs58010224  | chr6:112,429,134-112,575,917 | AX-156276035 |
| LAMA4 | rs58010224  | chr6:112,429,134-112,575,917 | AX-156293049 |
| LAMA4 | rs9320402   | chr6:112,429,134-112,575,917 | AX-15195415  |
| LAMA4 | rs6921858   | chr6:112,429,134-112,575,917 | AX-15195417  |
| LAMA4 | rs62414021  | chr6:112,429,134-112,575,917 | AX-35508269  |
| LAMA4 | rs1894682   | chr6:112,429,134-112,575,917 | AX-12509514  |
| LAMA4 | rs6932642   | chr6:112,429,134-112,575,917 | AX-156276036 |
| LAMA4 | rs6932642   | chr6:112,429,134-112,575,917 | AX-156293050 |
| LAMA4 | rs147318270 | chr6:112,429,134-112,575,917 | AX-151459910 |
| LAMA4 | rs147318270 | chr6:112,429,134-112,575,917 | AX-156297874 |
| LAMA4 | rs11153348  | chr6:112,429,134-112,575,917 | AX-11147440  |
| LAMA4 | rs9487863   | chr6:112,429,134-112,575,917 | AX-122219224 |
| LAMA4 | rs9487863   | chr6:112,429,134-112,575,917 | AX-122977005 |
| LAMA4 | rs11759718  | chr6:112,429,134-112,575,917 | AX-35508281  |
| LAMA4 | rs17757451  | chr6:112,429,134-112,575,917 | AX-156276037 |
| LAMA4 | rs17757451  | chr6:112,429,134-112,575,917 | AX-156293051 |
| LAMA4 | rs3208829   | chr6:112,429,134-112,575,917 | AX-15195421  |
| LAMA4 | rs72952403  | chr6:112,429,134-112,575,917 | AX-35508287  |
| LAMA4 | rs7766787   | chr6:112,429,134-112,575,917 | AX-11644144  |
| LAMP3 | rs116723189 | chr3:182,840,003-182,880,667 | AX-34197187  |
| LAMP3 | rs3821517   | chr3:182,840,003-182,880,667 | AX-14225123  |
| LAMP3 | rs491841    | chr3:182,840,003-182,880,667 | AX-14225124  |

|       |             |                              |              |
|-------|-------------|------------------------------|--------------|
| LAMP3 | rs3821520   | chr3:182,840,003-182,880,667 | AX-34197209  |
| LAMP3 | rs79447920  | chr3:182,840,003-182,880,667 | AX-14225130  |
| LAMP3 | rs515818    | chr3:182,840,003-182,880,667 | AX-12588829  |
| LAMP3 | rs150432783 | chr3:182,840,003-182,880,667 | AX-94353877  |
| LAMP3 | rs482912    | chr3:182,840,003-182,880,667 | AX-11529303  |
| LAMP3 | rs522235    | chr3:182,840,003-182,880,667 | AX-11542884  |
| LAMP3 | ---         | chr3:182,840,003-182,880,667 | AX-86611420  |
| LAMP3 | rs831256    | chr3:182,840,003-182,880,667 | AX-41179981  |
| LAMP3 | rs675924    | chr3:182,840,003-182,880,667 | AX-41179983  |
| LAMP3 | rs75470872  | chr3:182,840,003-182,880,667 | AX-34197235  |
| LAMP3 | rs955861    | chr3:182,840,003-182,880,667 | AX-11694561  |
| LAMP3 | rs7639990   | chr3:182,840,003-182,880,667 | AX-11635517  |
| LAMP3 | rs79155994  | chr3:182,840,003-182,880,667 | AX-14225161  |
| LAMP3 | rs76730564  | chr3:182,840,003-182,880,667 | AX-14225163  |
| LAMP3 | rs77611354  | chr3:182,840,003-182,880,667 | AX-14225164  |
| LAMP3 | rs10513791  | chr3:182,840,003-182,880,667 | AX-11114590  |
| LAMP3 | rs74965417  | chr3:182,840,003-182,880,667 | AX-34197249  |
| LAMP3 | rs75413779  | chr3:182,840,003-182,880,667 | AX-34197253  |
| LAMP3 | rs7648312   | chr3:182,840,003-182,880,667 | AX-14225171  |
| LAMP3 | rs41265435  | chr3:182,840,003-182,880,667 | AX-41180005  |
| LAMP3 | rs16833752  | chr3:182,840,003-182,880,667 | AX-41180009  |
| LAMP3 | rs115281513 | chr3:182,840,003-182,880,667 | AX-82974566  |
| LAMP3 | rs514636    | chr3:182,840,003-182,880,667 | AX-11542418  |
| LAMP3 | rs79275625  | chr3:182,840,003-182,880,667 | AX-34197279  |
| LAMP3 | rs114318380 | chr3:182,840,003-182,880,667 | AX-34197289  |
| LAMP3 | rs6414500   | chr3:182,840,003-182,880,667 | AX-11562816  |
| LAMP3 | rs500288    | chr3:182,840,003-182,880,667 | AX-11541085  |
| LAMP3 | rs653316    | chr3:182,840,003-182,880,667 | AX-14225181  |
| LAMP3 | rs2280563   | chr3:182,840,003-182,880,667 | AX-12523975  |
| LAMP3 | rs580116    | chr3:182,840,003-182,880,667 | AX-11547494  |
| LAMP3 | rs12493054  | chr3:182,840,003-182,880,667 | AX-11210034  |
| LAMP3 | rs76634661  | chr3:182,840,003-182,880,667 | AX-34197309  |
| LAMP3 | rs657261    | chr3:182,840,003-182,880,667 | AX-14225193  |
| LAMP3 | rs71314285  | chr3:182,840,003-182,880,667 | AX-34197319  |
| LAMP3 | rs6443856   | chr3:182,840,003-182,880,667 | AX-14225200  |
| LDB3  | rs34106786  | chr10:88,426,551-88,495,824  | AX-92691399  |
| LDB3  | rs34499525  | chr10:88,426,551-88,495,824  | AX-29753111  |
| LDB3  | rs2675693   | chr10:88,426,551-88,495,824  | AX-38900235  |
| LDB3  | rs34346910  | chr10:88,426,551-88,495,824  | AX-29753113  |
| LDB3  | rs34959905  | chr10:88,426,551-88,495,824  | AX-156294799 |
| LDB3  | rs4256897   | chr10:88,426,551-88,495,824  | AX-156278571 |
| LDB3  | rs4256897   | chr10:88,426,551-88,495,824  | AX-156294800 |
| LDB3  | rs2675692   | chr10:88,426,551-88,495,824  | AX-156279440 |
| LDB3  | rs2675692   | chr10:88,426,551-88,495,824  | AX-156295137 |
| LDB3  | rs2803555   | chr10:88,426,551-88,495,824  | AX-38900241  |
| LDB3  | rs11812601  | chr10:88,426,551-88,495,824  | AX-92611981  |
| LDB3  | rs2803556   | chr10:88,426,551-88,495,824  | AX-156278572 |
| LDB3  | rs2803556   | chr10:88,426,551-88,495,824  | AX-156294801 |
| LDB3  | rs2803558   | chr10:88,426,551-88,495,824  | AX-156278573 |
| LDB3  | rs2803558   | chr10:88,426,551-88,495,824  | AX-156294802 |
| LDB3  | rs12259201  | chr10:88,426,551-88,495,824  | AX-29753129  |
| LDB3  | rs3740342   | chr10:88,426,551-88,495,824  | AX-38900243  |
| LDB3  | ---         | chr10:88,426,551-88,495,824  | AX-92729928  |
| LDB3  | rs200764076 | chr10:88,426,551-88,495,824  | AX-156298264 |
| LDB3  | rs200764076 | chr10:88,426,551-88,495,824  | AX-29753135  |

|      |             |                             |              |
|------|-------------|-----------------------------|--------------|
| LDB3 | rs10887639  | chr10:88,426,551-88,495,824 | AX-156278574 |
| LDB3 | rs10887639  | chr10:88,426,551-88,495,824 | AX-156294803 |
| LDB3 | rs10887640  | chr10:88,426,551-88,495,824 | AX-29753139  |
| LDB3 | ---         | chr10:88,426,551-88,495,824 | AX-151160014 |
| LDB3 | rs4492716   | chr10:88,426,551-88,495,824 | AX-29753147  |
| LDB3 | rs12570315  | chr10:88,426,551-88,495,824 | AX-156278575 |
| LDB3 | rs2354363   | chr10:88,426,551-88,495,824 | AX-38900249  |
| LDB3 | rs12569813  | chr10:88,426,551-88,495,824 | AX-156278576 |
| LDB3 | rs12569813  | chr10:88,426,551-88,495,824 | AX-156294805 |
| LDB3 | rs2244769   | chr10:88,426,551-88,495,824 | AX-38900253  |
| LDB3 | rs2803560   | chr10:88,426,551-88,495,824 | AX-38900255  |
| LDB3 | rs11202117  | chr10:88,426,551-88,495,824 | AX-84609964  |
| LDB3 | rs11202117  | chr10:88,426,551-88,495,824 | AX-84621581  |
| LDB3 | rs11202118  | chr10:88,426,551-88,495,824 | AX-92583436  |
| LDB3 | rs11202118  | chr10:88,426,551-88,495,824 | AX-92794459  |
| LDB3 | rs11202119  | chr10:88,426,551-88,495,824 | AX-92616480  |
| LDB3 | rs34677208  | chr10:88,426,551-88,495,824 | AX-92457859  |
| LDB3 | rs34677208  | chr10:88,426,551-88,495,824 | AX-92668882  |
| LDB3 | rs11202120  | chr10:88,426,551-88,495,824 | AX-156278579 |
| LDB3 | rs10788522  | chr10:88,426,551-88,495,824 | AX-156278580 |
| LDB3 | rs10788522  | chr10:88,426,551-88,495,824 | AX-156294807 |
| LDB3 | rs11202121  | chr10:88,426,551-88,495,824 | AX-38900259  |
| LDB3 | rs67431774  | chr10:88,426,551-88,495,824 | AX-29753167  |
| LDB3 | rs2354362   | chr10:88,426,551-88,495,824 | AX-29753173  |
| LDB3 | rs2354361   | chr10:88,426,551-88,495,824 | AX-156294808 |
| LDB3 | rs2354360   | chr10:88,426,551-88,495,824 | AX-92581825  |
| LDB3 | rs2354360   | chr10:88,426,551-88,495,824 | AX-92792848  |
| LDB3 | rs2354359   | chr10:88,426,551-88,495,824 | AX-156269247 |
| LDB3 | rs2354359   | chr10:88,426,551-88,495,824 | AX-156288764 |
| LDB3 | rs2354358   | chr10:88,426,551-88,495,824 | AX-156288765 |
| LDB3 | rs2354357   | chr10:88,426,551-88,495,824 | AX-29753179  |
| LDB3 | rs7895178   | chr10:88,426,551-88,495,824 | AX-92455633  |
| LDB3 | rs2247689   | chr10:88,426,551-88,495,824 | AX-38900265  |
| LDB3 | rs7894381   | chr10:88,426,551-88,495,824 | AX-29753183  |
| LDB3 | rs1806471   | chr10:88,426,551-88,495,824 | AX-156279441 |
| LDB3 | rs1806471   | chr10:88,426,551-88,495,824 | AX-156295138 |
| LDB3 | rs2803561   | chr10:88,426,551-88,495,824 | AX-156279442 |
| LDB3 | rs2803561   | chr10:88,426,551-88,495,824 | AX-156295139 |
| LDB3 | ---         | chr10:88,426,551-88,495,824 | AX-38900267  |
| LDB3 | rs2803563   | chr10:88,426,551-88,495,824 | AX-156279443 |
| LDB3 | rs2803563   | chr10:88,426,551-88,495,824 | AX-156295140 |
| LDB3 | rs2803564   | chr10:88,426,551-88,495,824 | AX-156295141 |
| LDB3 | rs2675700   | chr10:88,426,551-88,495,824 | AX-156279445 |
| LDB3 | rs10887642  | chr10:88,426,551-88,495,824 | AX-29753199  |
| LDB3 | rs2354356   | chr10:88,426,551-88,495,824 | AX-156278582 |
| LDB3 | rs2354356   | chr10:88,426,551-88,495,824 | AX-156294809 |
| LDB3 | rs10788523  | chr10:88,426,551-88,495,824 | AX-29753203  |
| LDB3 | rs11819261  | chr10:88,426,551-88,495,824 | AX-29753205  |
| LDB3 | rs12771857  | chr10:88,426,551-88,495,824 | AX-156278583 |
| LDB3 | rs12771857  | chr10:88,426,551-88,495,824 | AX-156294810 |
| LDB3 | rs11592193  | chr10:88,426,551-88,495,824 | AX-92537192  |
| LDB3 | rs11592193  | chr10:88,426,551-88,495,824 | AX-92748215  |
| LDB3 | rs7074015   | chr10:88,426,551-88,495,824 | AX-29753213  |
| LDB3 | rs7475311   | chr10:88,426,551-88,495,824 | AX-29753215  |
| LDB3 | rs114576982 | chr10:88,426,551-88,495,824 | AX-156278487 |

|      |             |                             |              |
|------|-------------|-----------------------------|--------------|
| LDB3 | rs114576982 | chr10:88,426,551-88,495,824 | AX-95862165  |
| LDB3 | ---         | chr10:88,426,551-88,495,824 | AX-151227712 |
| LDB3 | ---         | chr10:88,426,551-88,495,824 | AX-156297706 |
| LDB3 | rs12240576  | chr10:88,426,551-88,495,824 | AX-156278585 |
| LDB3 | rs12268509  | chr10:88,426,551-88,495,824 | AX-156278586 |
| LDB3 | rs12268509  | chr10:88,426,551-88,495,824 | AX-156294813 |
| LDB3 | rs12240646  | chr10:88,426,551-88,495,824 | AX-29753223  |
| LDB3 | rs10887643  | chr10:88,426,551-88,495,824 | AX-29753225  |
| LDB3 | rs61857111  | chr10:88,426,551-88,495,824 | AX-29753227  |
| LDB3 | rs61857112  | chr10:88,426,551-88,495,824 | AX-156278587 |
| LDB3 | rs61857113  | chr10:88,426,551-88,495,824 | AX-156294815 |
| LDB3 | rs10788524  | chr10:88,426,551-88,495,824 | AX-38900271  |
| LDB3 | rs2803566   | chr10:88,426,551-88,495,824 | AX-38900273  |
| LDB3 | rs12241060  | chr10:88,426,551-88,495,824 | AX-156278589 |
| LDB3 | rs12241060  | chr10:88,426,551-88,495,824 | AX-156294816 |
| LDB3 | rs10887644  | chr10:88,426,551-88,495,824 | AX-156278590 |
| LDB3 | rs10887645  | chr10:88,426,551-88,495,824 | AX-29753233  |
| LDB3 | rs2803567   | chr10:88,426,551-88,495,824 | AX-38900275  |
| LDB3 | rs10788525  | chr10:88,426,551-88,495,824 | AX-38900277  |
| LDB3 | rs2803568   | chr10:88,426,551-88,495,824 | AX-156278591 |
| LDB3 | rs2803568   | chr10:88,426,551-88,495,824 | AX-156294818 |
| LDB3 | rs10887646  | chr10:88,426,551-88,495,824 | AX-156294819 |
| LDB3 | rs4462249   | chr10:88,426,551-88,495,824 | AX-38900285  |
| LDB3 | rs4934242   | chr10:88,426,551-88,495,824 | AX-148615102 |
| LDB3 | rs12254069  | chr10:88,426,551-88,495,824 | AX-38900293  |
| LDB3 | ---         | chr10:88,426,551-88,495,824 | AX-38900295  |
| LDB3 | rs45591834  | chr10:88,426,551-88,495,824 | AX-83363529  |
| LDB3 | rs3740343   | chr10:88,426,551-88,495,824 | AX-38900297  |
| LDB3 | rs3740344   | chr10:88,426,551-88,495,824 | AX-29753245  |
| LDB3 | rs60835566  | chr10:88,426,551-88,495,824 | AX-29753247  |
| LDB3 | rs45617137  | chr10:88,426,551-88,495,824 | AX-29753253  |
| LDB3 | rs2803570   | chr10:88,426,551-88,495,824 | AX-38900299  |
| LDB3 | rs111775171 | chr10:88,426,551-88,495,824 | AX-151271668 |
| LDB3 | rs111775171 | chr10:88,426,551-88,495,824 | AX-156285871 |
| LDB3 | rs2248537   | chr10:88,426,551-88,495,824 | AX-107874302 |
| LDB3 | rs2248538   | chr10:88,426,551-88,495,824 | AX-156278593 |
| LDB3 | rs2248538   | chr10:88,426,551-88,495,824 | AX-156294820 |
| LDB3 | rs2248643   | chr10:88,426,551-88,495,824 | AX-156278594 |
| LDB3 | rs2675686   | chr10:88,426,551-88,495,824 | AX-156278595 |
| LDB3 | rs45487699  | chr10:88,426,551-88,495,824 | AX-83414002  |
| LDB3 | ---         | chr10:88,426,551-88,495,824 | AX-83190212  |
| LDB3 | rs121908337 | chr10:88,426,551-88,495,824 | AX-90069129  |
| LDB3 | rs55815121  | chr10:88,426,551-88,495,824 | AX-29753275  |
| LDB3 | rs56165849  | chr10:88,426,551-88,495,824 | AX-29753277  |
| LDB3 | rs4933404   | chr10:88,426,551-88,495,824 | AX-29753279  |
| LDB3 | rs10749541  | chr10:88,426,551-88,495,824 | AX-29753281  |
| LDB3 | rs58051699  | chr10:88,426,551-88,495,824 | AX-29753283  |
| LDB3 | rs4934243   | chr10:88,426,551-88,495,824 | AX-38900303  |
| LDB3 | rs4934244   | chr10:88,426,551-88,495,824 | AX-29753291  |
| LDB3 | rs11202124  | chr10:88,426,551-88,495,824 | AX-38900305  |
| LDB3 | rs12244569  | chr10:88,426,551-88,495,824 | AX-114212614 |
| LDB3 | rs12244569  | chr10:88,426,551-88,495,824 | AX-156278596 |
| LDB3 | rs12244574  | chr10:88,426,551-88,495,824 | AX-113731303 |
| LDB3 | rs12244574  | chr10:88,426,551-88,495,824 | AX-156294822 |
| LDB3 | rs12251540  | chr10:88,426,551-88,495,824 | AX-38900311  |

|      |             |                             |              |
|------|-------------|-----------------------------|--------------|
| LDB3 | rs11599515  | chr10:88,426,551-88,495,824 | AX-29753295  |
| LDB3 | rs10887647  | chr10:88,426,551-88,495,824 | AX-29753297  |
| LDB3 | rs11594919  | chr10:88,426,551-88,495,824 | AX-29753299  |
| LDB3 | rs35605324  | chr10:88,426,551-88,495,824 | AX-29753301  |
| LDB3 | rs4934245   | chr10:88,426,551-88,495,824 | AX-38900313  |
| LDB3 | rs4934246   | chr10:88,426,551-88,495,824 | AX-29753305  |
| LDB3 | rs10887648  | chr10:88,426,551-88,495,824 | AX-156278597 |
| LDB3 | rs10887648  | chr10:88,426,551-88,495,824 | AX-156294823 |
| LDB3 | rs4934247   | chr10:88,426,551-88,495,824 | AX-114212615 |
| LDB3 | rs4934247   | chr10:88,426,551-88,495,824 | AX-156278598 |
| LDB3 | rs4934248   | chr10:88,426,551-88,495,824 | AX-113731306 |
| LDB3 | rs4934248   | chr10:88,426,551-88,495,824 | AX-156278599 |
| LDB3 | rs76076271  | chr10:88,426,551-88,495,824 | AX-156278600 |
| LDB3 | rs76076271  | chr10:88,426,551-88,495,824 | AX-156294824 |
| LDB3 | rs4934249   | chr10:88,426,551-88,495,824 | AX-156278601 |
| LDB3 | rs4934249   | chr10:88,426,551-88,495,824 | AX-156294825 |
| LDB3 | rs4934250   | chr10:88,426,551-88,495,824 | AX-113247830 |
| LDB3 | rs4934250   | chr10:88,426,551-88,495,824 | AX-156278602 |
| LDB3 | rs79039198  | chr10:88,426,551-88,495,824 | AX-113731307 |
| LDB3 | rs79102492  | chr10:88,426,551-88,495,824 | AX-114212616 |
| LDB3 | rs11593608  | chr10:88,426,551-88,495,824 | AX-38900315  |
| LDB3 | rs7893160   | chr10:88,426,551-88,495,824 | AX-156279446 |
| LDB3 | rs7893160   | chr10:88,426,551-88,495,824 | AX-156295143 |
| LDB3 | rs7923558   | chr10:88,426,551-88,495,824 | AX-29753323  |
| LDB3 | rs35422936  | chr10:88,426,551-88,495,824 | AX-29753327  |
| LDB3 | rs3740345   | chr10:88,426,551-88,495,824 | AX-38900319  |
| LDB3 | rs3802662   | chr10:88,426,551-88,495,824 | AX-156278605 |
| LDB3 | rs3802662   | chr10:88,426,551-88,495,824 | AX-156294828 |
| LDB3 | rs3802663   | chr10:88,426,551-88,495,824 | AX-38900323  |
| LDB3 | rs111318302 | chr10:88,426,551-88,495,824 | AX-29753337  |
| LDB3 | rs11202126  | chr10:88,426,551-88,495,824 | AX-29753339  |
| LDB3 | rs1986382   | chr10:88,426,551-88,495,824 | AX-38900327  |
| LDB3 | rs1986383   | chr10:88,426,551-88,495,824 | AX-148073586 |
| LDB3 | rs1986383   | chr10:88,426,551-88,495,824 | AX-156278606 |
| LDB3 | rs113972163 | chr10:88,426,551-88,495,824 | AX-120525321 |
| LDB3 | rs113972163 | chr10:88,426,551-88,495,824 | AX-148654791 |
| LDB3 | rs1578895   | chr10:88,426,551-88,495,824 | AX-156278607 |
| LDB3 | rs1578895   | chr10:88,426,551-88,495,824 | AX-156294829 |
| LDB3 | rs73344172  | chr10:88,426,551-88,495,824 | AX-156278608 |
| LDB3 | ---         | chr10:88,426,551-88,495,824 | AX-156278609 |
| LDB3 | ---         | chr10:88,426,551-88,495,824 | AX-156294830 |
| LDB3 | rs121908338 | chr10:88,426,551-88,495,824 | AX-83137332  |
| LDB3 | rs76615432  | chr10:88,426,551-88,495,824 | AX-29753347  |
| LDB3 | rs111941601 | chr10:88,426,551-88,495,824 | AX-156278610 |
| LDB3 | rs111941601 | chr10:88,426,551-88,495,824 | AX-156294831 |
| LDB3 | rs79106435  | chr10:88,426,551-88,495,824 | AX-29753355  |
| LDB3 | rs144097163 | chr10:88,426,551-88,495,824 | AX-120855529 |
| LDB3 | rs144097163 | chr10:88,426,551-88,495,824 | AX-121508691 |
| LDB3 | rs79025854  | chr10:88,426,551-88,495,824 | AX-29753361  |
| LDB3 | rs6586023   | chr10:88,426,551-88,495,824 | AX-38900333  |
| LDB3 | rs200829736 | chr10:88,426,551-88,495,824 | AX-151141337 |
| LDB3 | rs200829736 | chr10:88,426,551-88,495,824 | AX-156298190 |
| LDB3 | rs11331035  | chr10:88,426,551-88,495,824 | AX-107827328 |
| LDB3 | rs11331035  | chr10:88,426,551-88,495,824 | AX-156278611 |
| LDB3 | rs4934251   | chr10:88,426,551-88,495,824 | AX-38900337  |

|      |             |                             |              |
|------|-------------|-----------------------------|--------------|
| LDB3 | rs12251655  | chr10:88,426,551-88,495,824 | AX-38900339  |
| LDB3 | rs72848117  | chr10:88,426,551-88,495,824 | AX-29753373  |
| LDB3 | rs78559934  | chr10:88,426,551-88,495,824 | AX-29753375  |
| LDB3 | rs11312118  | chr10:88,426,551-88,495,824 | AX-107885510 |
| LDB3 | rs34423165  | chr10:88,426,551-88,495,824 | AX-83591867  |
| LDB3 | rs73344181  | chr10:88,426,551-88,495,824 | AX-29753379  |
| LDB3 | rs2675691   | chr10:88,426,551-88,495,824 | AX-38900343  |
| LDB3 | rs7069570   | chr10:88,426,551-88,495,824 | AX-156278613 |
| LDB3 | rs7069570   | chr10:88,426,551-88,495,824 | AX-156294832 |
| LDB3 | rs117434536 | chr10:88,426,551-88,495,824 | AX-29753389  |
| LDB3 | rs7086308   | chr10:88,426,551-88,495,824 | AX-156279447 |
| LDB3 | rs7086308   | chr10:88,426,551-88,495,824 | AX-156295144 |
| LDB3 | rs7085298   | chr10:88,426,551-88,495,824 | AX-156279448 |
| LDB3 | rs7085298   | chr10:88,426,551-88,495,824 | AX-156295145 |
| LDB3 | ---         | chr10:88,426,551-88,495,824 | AX-121378617 |
| LDB3 | rs2803572   | chr10:88,426,551-88,495,824 | AX-38900351  |
| LDB3 | rs4933405   | chr10:88,426,551-88,495,824 | AX-38900355  |
| LDB3 | rs137917288 | chr10:88,426,551-88,495,824 | AX-151272077 |
| LDB3 | rs4933406   | chr10:88,426,551-88,495,824 | AX-29753399  |
| LDB3 | rs142137148 | chr10:88,426,551-88,495,824 | AX-148628830 |
| LDB3 | rs142137148 | chr10:88,426,551-88,495,824 | AX-156283631 |
| LDB3 | rs12414832  | chr10:88,426,551-88,495,824 | AX-96773365  |
| LDB3 | rs7088948   | chr10:88,426,551-88,495,824 | AX-29753405  |
| LDB3 | rs4933407   | chr10:88,426,551-88,495,824 | AX-156294833 |
| LDB3 | rs80257700  | chr10:88,426,551-88,495,824 | AX-29753407  |
| LDB3 | rs17106945  | chr10:88,426,551-88,495,824 | AX-38900357  |
| LDB3 | rs121908335 | chr10:88,426,551-88,495,824 | AX-90069128  |
| LDB3 | rs41306868  | chr10:88,426,551-88,495,824 | AX-29753413  |
| LDB3 | rs75224783  | chr10:88,426,551-88,495,824 | AX-29753417  |
| LDB3 | rs78137867  | chr10:88,426,551-88,495,824 | AX-29753427  |
| LDB3 | rs112644179 | chr10:88,426,551-88,495,824 | AX-29753429  |
| LDB3 | rs7908829   | chr10:88,426,551-88,495,824 | AX-29753431  |
| LDB3 | rs10887650  | chr10:88,426,551-88,495,824 | AX-75179613  |
| LDB3 | rs10887650  | chr10:88,426,551-88,495,824 | AX-84662076  |
| LDB3 | rs12258339  | chr10:88,426,551-88,495,824 | AX-29753435  |
| LDB3 | rs12260726  | chr10:88,426,551-88,495,824 | AX-38900361  |
| LDB3 | rs57219964  | chr10:88,426,551-88,495,824 | AX-29753455  |
| LDB3 | rs115120690 | chr10:88,426,551-88,495,824 | AX-156278614 |
| LDB3 | rs115120690 | chr10:88,426,551-88,495,824 | AX-92455242  |
| LDB3 | rs111668579 | chr10:88,426,551-88,495,824 | AX-156294834 |
| LDB3 | rs17106956  | chr10:88,426,551-88,495,824 | AX-38900365  |
| LDB3 | ---         | chr10:88,426,551-88,495,824 | AX-91995800  |
| LDB3 | ---         | chr10:88,426,551-88,495,824 | AX-92020927  |
| LDB3 | rs138251566 | chr10:88,426,551-88,495,824 | AX-86664758  |
| LDB3 | rs17106959  | chr10:88,426,551-88,495,824 | AX-156279449 |
| LDB3 | rs17106959  | chr10:88,426,551-88,495,824 | AX-156295146 |
| LDB3 | rs17426017  | chr10:88,426,551-88,495,824 | AX-38900371  |
| LDB3 | rs17426050  | chr10:88,426,551-88,495,824 | AX-107775749 |
| LDB3 | rs17426050  | chr10:88,426,551-88,495,824 | AX-156295147 |
| LDB3 | rs17106968  | chr10:88,426,551-88,495,824 | AX-156278616 |
| LDB3 | rs17106968  | chr10:88,426,551-88,495,824 | AX-156294835 |
| LDB3 | rs78837280  | chr10:88,426,551-88,495,824 | AX-29753471  |
| LDB3 | rs10788526  | chr10:88,426,551-88,495,824 | AX-88907637  |
| LDB3 | rs3740347   | chr10:88,426,551-88,495,824 | AX-147797807 |
| LDB3 | rs3740347   | chr10:88,426,551-88,495,824 | AX-147891694 |

|      |             |                             |              |
|------|-------------|-----------------------------|--------------|
| LDB3 | rs11597201  | chr10:88,426,551-88,495,824 | AX-156278617 |
| LDB3 | rs11597201  | chr10:88,426,551-88,495,824 | AX-156294836 |
| LDB3 | rs10887651  | chr10:88,426,551-88,495,824 | AX-29753479  |
| LDB3 | rs7907134   | chr10:88,426,551-88,495,824 | AX-29753481  |
| LDB3 | rs11202136  | chr10:88,426,551-88,495,824 | AX-122990539 |
| LDB3 | rs11202136  | chr10:88,426,551-88,495,824 | AX-122990540 |
| LDB3 | rs61857119  | chr10:88,426,551-88,495,824 | AX-122990542 |
| LDB3 | rs4934252   | chr10:88,426,551-88,495,824 | AX-38900387  |
| LDB3 | rs114459062 | chr10:88,426,551-88,495,824 | AX-122004029 |
| LDB3 | rs114459062 | chr10:88,426,551-88,495,824 | AX-148678546 |
| LDB3 | rs115462341 | chr10:88,426,551-88,495,824 | AX-29753487  |
| LDB3 | rs12263789  | chr10:88,426,551-88,495,824 | AX-148200208 |
| LDB3 | rs12263789  | chr10:88,426,551-88,495,824 | AX-148271944 |
| LDB3 | rs59709955  | chr10:88,426,551-88,495,824 | AX-29753491  |
| LDB3 | rs6586024   | chr10:88,426,551-88,495,824 | AX-38900389  |
| LDB3 | rs6586025   | chr10:88,426,551-88,495,824 | AX-38900391  |
| LDB3 | rs78214136  | chr10:88,426,551-88,495,824 | AX-156279450 |
| LDB3 | rs78214136  | chr10:88,426,551-88,495,824 | AX-156295148 |
| LDB3 | rs55851450  | chr10:88,426,551-88,495,824 | AX-29753499  |
| LDB3 | rs74150398  | chr10:88,426,551-88,495,824 | AX-156279451 |
| LDB3 | rs74150398  | chr10:88,426,551-88,495,824 | AX-156295149 |
| LDB3 | rs12218046  | chr10:88,426,551-88,495,824 | AX-29753507  |
| LDB3 | ---         | chr10:88,426,551-88,495,824 | AX-29753513  |
| LDB3 | rs138951890 | chr10:88,426,551-88,495,824 | AX-83156469  |
| LDB3 | rs374426474 | chr10:88,426,551-88,495,824 | AX-94379840  |
| LDB3 | ---         | chr10:88,426,551-88,495,824 | AX-86555906  |
| LDB3 | rs7910307   | chr10:88,426,551-88,495,824 | AX-29753515  |
| LDB3 | rs6586026   | chr10:88,426,551-88,495,824 | AX-29753517  |
| LDB3 | rs6586027   | chr10:88,426,551-88,495,824 | AX-29753519  |
| LDB3 | ---         | chr10:88,426,551-88,495,824 | AX-86572756  |
| LDB3 | rs11202138  | chr10:88,426,551-88,495,824 | AX-38900395  |
| LDB3 | rs76870416  | chr10:88,426,551-88,495,824 | AX-29753533  |
| LDB3 | rs12770250  | chr10:88,426,551-88,495,824 | AX-119662868 |
| LDB3 | rs12770250  | chr10:88,426,551-88,495,824 | AX-92496214  |
| LDB3 | rs7909928   | chr10:88,426,551-88,495,824 | AX-148413163 |
| LDB3 | rs7909928   | chr10:88,426,551-88,495,824 | AX-156278618 |
| LDB3 | ---         | chr10:88,426,551-88,495,824 | AX-151194499 |
| LDB3 | ---         | chr10:88,426,551-88,495,824 | AX-156285620 |
| LDB3 | rs35569375  | chr10:88,426,551-88,495,824 | AX-29753541  |
| LDB3 | rs71487278  | chr10:88,426,551-88,495,824 | AX-151210155 |
| LDB3 | rs12570979  | chr10:88,426,551-88,495,824 | AX-122546023 |
| LDB3 | rs7897549   | chr10:88,426,551-88,495,824 | AX-29753551  |
| LDB3 | rs4408238   | chr10:88,426,551-88,495,824 | AX-38900403  |
| LDB3 | rs4525132   | chr10:88,426,551-88,495,824 | AX-16419567  |
| LDB3 | rs4620630   | chr10:88,426,551-88,495,824 | AX-38900405  |
| LDB3 | rs143925234 | chr10:88,426,551-88,495,824 | AX-148519622 |
| LDB3 | rs75262790  | chr10:88,426,551-88,495,824 | AX-148300758 |
| LDB3 | rs12771609  | chr10:88,426,551-88,495,824 | AX-148247504 |
| LDB3 | rs12771609  | chr10:88,426,551-88,495,824 | AX-96883440  |
| LDB3 | rs4611110   | chr10:88,426,551-88,495,824 | AX-156278619 |
| LDB3 | rs4611110   | chr10:88,426,551-88,495,824 | AX-156294838 |
| LDB3 | rs4556455   | chr10:88,426,551-88,495,824 | AX-156294839 |
| LDB3 | rs58389996  | chr10:88,426,551-88,495,824 | AX-123012587 |
| LDB3 | rs58389996  | chr10:88,426,551-88,495,824 | AX-148225684 |
| LDB3 | rs7918367   | chr10:88,426,551-88,495,824 | AX-148221726 |

|      |             |                              |              |
|------|-------------|------------------------------|--------------|
| LDB3 | rs7918367   | chr10:88,426,551-88,495,824  | AX-92575197  |
| LDB3 | rs7092188   | chr10:88,426,551-88,495,824  | AX-38900411  |
| LDB3 | rs45514002  | chr10:88,426,551-88,495,824  | AX-60793033  |
| LDB3 | rs549994359 | chr10:88,426,551-88,495,824  | AX-86669239  |
| LDB3 | rs45577134  | chr10:88,426,551-88,495,824  | AX-83004192  |
| LDB3 | rs34647099  | chr10:88,426,551-88,495,824  | AX-11450527  |
| LDB3 | rs17335168  | chr10:88,426,551-88,495,824  | AX-11320068  |
| LDB3 | rs6586029   | chr10:88,426,551-88,495,824  | AX-148028412 |
| LDB3 | rs6586029   | chr10:88,426,551-88,495,824  | AX-96910085  |
| LDB3 | rs7901128   | chr10:88,426,551-88,495,824  | AX-151319274 |
| LDB3 | rs7901128   | chr10:88,426,551-88,495,824  | AX-156283632 |
| LDB3 | rs201310813 | chr10:88,426,551-88,495,824  | AX-120340158 |
| LDB3 | rs201310813 | chr10:88,426,551-88,495,824  | AX-156286415 |
| LDB3 | rs6586031   | chr10:88,426,551-88,495,824  | AX-38900419  |
| LDB3 | rs11202140  | chr10:88,426,551-88,495,824  | AX-148694902 |
| LDB3 | rs7908765   | chr10:88,426,551-88,495,824  | AX-11653125  |
| LDB3 | rs74534603  | chr10:88,426,551-88,495,824  | AX-16419577  |
| LDB3 | rs35496319  | chr10:88,426,551-88,495,824  | AX-151194276 |
| LDB3 | rs35496319  | chr10:88,426,551-88,495,824  | AX-156297877 |
| LDB3 | rs67467603  | chr10:88,426,551-88,495,824  | AX-120937137 |
| LDB3 | rs74150399  | chr10:88,426,551-88,495,824  | AX-29753569  |
| LDB3 | rs12262050  | chr10:88,426,551-88,495,824  | AX-148668636 |
| LDB3 | rs12262050  | chr10:88,426,551-88,495,824  | AX-156278621 |
| LDB3 | rs61857148  | chr10:88,426,551-88,495,824  | AX-148006751 |
| LDB3 | rs61857148  | chr10:88,426,551-88,495,824  | AX-153819006 |
| LDB3 | rs58418100  | chr10:88,426,551-88,495,824  | AX-148086318 |
| LDB3 | rs58418100  | chr10:88,426,551-88,495,824  | AX-156283633 |
| LDB3 | rs7916248   | chr10:88,426,551-88,495,824  | AX-156278622 |
| LDB3 | rs7916248   | chr10:88,426,551-88,495,824  | AX-156294840 |
| LDB3 | rs59412880  | chr10:88,426,551-88,495,824  | AX-151320159 |
| LDB3 | rs59412880  | chr10:88,426,551-88,495,824  | AX-156283634 |
| LDB3 | rs7899324   | chr10:88,426,551-88,495,824  | AX-148251372 |
| LDB3 | rs7899324   | chr10:88,426,551-88,495,824  | AX-156278623 |
| LDB3 | rs7899337   | chr10:88,426,551-88,495,824  | AX-151117236 |
| LDB3 | rs7899337   | chr10:88,426,551-88,495,824  | AX-156278624 |
| LDB3 | rs34218952  | chr10:88,426,551-88,495,824  | AX-12551711  |
| LDB3 | rs45516103  | chr10:88,426,551-88,495,824  | AX-11510513  |
| LDB3 | rs35222021  | chr10:88,426,551-88,495,824  | AX-156278625 |
| LDB3 | rs35222021  | chr10:88,426,551-88,495,824  | AX-156294841 |
| LDB3 | rs74150400  | chr10:88,426,551-88,495,824  | AX-84769178  |
| LMNA | ---         | chr1:156,084,461-156,109,880 | AX-90078922  |
| LMNA | ---         | chr1:156,084,461-156,109,880 | AX-90026405  |
| LMNA | ---         | chr1:156,084,461-156,109,880 | AX-90072999  |
| LMNA | rs267607614 | chr1:156,084,461-156,109,880 | AX-90057716  |
| LMNA | rs56694480  | chr1:156,084,461-156,109,880 | AX-90070303  |
| LMNA | rs267607601 | chr1:156,084,461-156,109,880 | AX-90026406  |
| LMNA | ---         | chr1:156,084,461-156,109,880 | AX-90036615  |
| LMNA | rs267607627 | chr1:156,084,461-156,109,880 | AX-90056943  |
| LMNA | rs57983345  | chr1:156,084,461-156,109,880 | AX-90070316  |
| LMNA | ---         | chr1:156,084,461-156,109,880 | AX-90027631  |
| LMNA | rs60446065  | chr1:156,084,461-156,109,880 | AX-90041458  |
| LMNA | rs58436778  | chr1:156,084,461-156,109,880 | AX-90070322  |
| LMNA | rs267607608 | chr1:156,084,461-156,109,880 | AX-90030363  |
| LMNA | ---         | chr1:156,084,461-156,109,880 | AX-90032303  |
| LMNA | rs59931416  | chr1:156,084,461-156,109,880 | AX-90041455  |



|      |             |                              |              |
|------|-------------|------------------------------|--------------|
| LMNA | rs60695352  | chr1:156,084,461-156,109,880 | AX-90041462  |
| LMNA | rs397517895 | chr1:156,084,461-156,109,880 | AX-90056472  |
| LMNA | rs60290646  | chr1:156,084,461-156,109,880 | AX-88797813  |
| LMNA | rs28928903  | chr1:156,084,461-156,109,880 | AX-90041411  |
| LMNA | rs58922911  | chr1:156,084,461-156,109,880 | AX-90070330  |
| LMNA | rs28928900  | chr1:156,084,461-156,109,880 | AX-90070296  |
| LMNA | rs56793579  | chr1:156,084,461-156,109,880 | AX-90070305  |
| LMNA | ---         | chr1:156,084,461-156,109,880 | AX-90058773  |
| LMNA | ---         | chr1:156,084,461-156,109,880 | AX-90062394  |
| LMNA | ---         | chr1:156,084,461-156,109,880 | AX-90028866  |
| LMNA | rs59270054  | chr1:156,084,461-156,109,880 | AX-88754765  |
| LMNA | ---         | chr1:156,084,461-156,109,880 | AX-90028887  |
| LMNA | ---         | chr1:156,084,461-156,109,880 | AX-88754763  |
| LMNA | rs267607560 | chr1:156,084,461-156,109,880 | AX-90037359  |
| LMNA | rs267607568 | chr1:156,084,461-156,109,880 | AX-90026407  |
| LMNA | ---         | chr1:156,084,461-156,109,880 | AX-90032547  |
| LMNA | ---         | chr1:156,084,461-156,109,880 | AX-88754772  |
| LMNA | ---         | chr1:156,084,461-156,109,880 | AX-90079932  |
| LMNA | ---         | chr1:156,084,461-156,109,880 | AX-90072289  |
| LMNA | rs547915    | chr1:156,084,461-156,109,880 | AX-11544386  |
| LMNA | rs481995    | chr1:156,084,461-156,109,880 | AX-148398638 |
| LMNA | rs481995    | chr1:156,084,461-156,109,880 | AX-156266010 |
| LMNA | rs675661    | chr1:156,084,461-156,109,880 | AX-148604618 |
| LMNA | rs675661    | chr1:156,084,461-156,109,880 | AX-86897221  |
| LMNA | rs582690    | chr1:156,084,461-156,109,880 | AX-39099859  |
| LMNA | rs584025    | chr1:156,084,461-156,109,880 | AX-39099861  |
| LMNA | rs517606    | chr1:156,084,461-156,109,880 | AX-148378277 |
| LMNA | rs517606    | chr1:156,084,461-156,109,880 | AX-156270489 |
| LMNA | rs503815    | chr1:156,084,461-156,109,880 | AX-30126917  |
| LMNA | rs609625    | chr1:156,084,461-156,109,880 | AX-156266011 |
| LMNA | rs609625    | chr1:156,084,461-156,109,880 | AX-156286662 |
| LMNA | rs501791    | chr1:156,084,461-156,109,880 | AX-16629042  |
| LMNA | rs610918    | chr1:156,084,461-156,109,880 | AX-30126921  |
| LMNA | rs653969    | chr1:156,084,461-156,109,880 | AX-156266012 |
| LMNA | rs653969    | chr1:156,084,461-156,109,880 | AX-156286663 |
| LMNA | rs521354    | chr1:156,084,461-156,109,880 | AX-156266013 |
| LMNA | rs521354    | chr1:156,084,461-156,109,880 | AX-156286664 |
| LMNA | rs60880750  | chr1:156,084,461-156,109,880 | AX-151284027 |
| LMNA | rs60880750  | chr1:156,084,461-156,109,880 | AX-156285358 |
| LMNA | rs6686943   | chr1:156,084,461-156,109,880 | AX-115127940 |
| LMNA | rs6686943   | chr1:156,084,461-156,109,880 | AX-115162260 |
| LMNA | rs693671    | chr1:156,084,461-156,109,880 | AX-39099865  |
| LMNA | rs9427236   | chr1:156,084,461-156,109,880 | AX-39099867  |
| LMNA | rs2993269   | chr1:156,084,461-156,109,880 | AX-30126945  |
| LMNA | rs500940    | chr1:156,084,461-156,109,880 | AX-105168673 |
| LMNA | rs500940    | chr1:156,084,461-156,109,880 | AX-156266014 |
| LMNA | rs671728    | chr1:156,084,461-156,109,880 | AX-148463046 |
| LMNA | rs672200    | chr1:156,084,461-156,109,880 | AX-156266015 |
| LMNA | rs672200    | chr1:156,084,461-156,109,880 | AX-156286665 |
| LMNA | rs2993268   | chr1:156,084,461-156,109,880 | AX-30126955  |
| LMNA | rs2993267   | chr1:156,084,461-156,109,880 | AX-30126957  |
| LMNA | rs4661147   | chr1:156,084,461-156,109,880 | AX-50055237  |
| LMNA | rs2485676   | chr1:156,084,461-156,109,880 | AX-39099873  |
| LMNA | rs111616133 | chr1:156,084,461-156,109,880 | AX-148263576 |
| LMNA | rs111616133 | chr1:156,084,461-156,109,880 | AX-151285710 |

|      |             |                              |              |
|------|-------------|------------------------------|--------------|
| LMNA | rs544627    | chr1:156,084,461-156,109,880 | AX-148470750 |
| LMNA | rs544627    | chr1:156,084,461-156,109,880 | AX-156279832 |
| LMNA | rs471679    | chr1:156,084,461-156,109,880 | AX-151245862 |
| LMNA | rs471679    | chr1:156,084,461-156,109,880 | AX-156279833 |
| LMNA | rs581342    | chr1:156,084,461-156,109,880 | AX-148430678 |
| LMNA | rs581342    | chr1:156,084,461-156,109,880 | AX-156279834 |
| LMNA | rs2485675   | chr1:156,084,461-156,109,880 | AX-148467916 |
| LMNA | rs2485675   | chr1:156,084,461-156,109,880 | AX-156279835 |
| LMNA | rs2485674   | chr1:156,084,461-156,109,880 | AX-123008043 |
| LMNA | rs2485674   | chr1:156,084,461-156,109,880 | AX-156279836 |
| LMNA | rs2485673   | chr1:156,084,461-156,109,880 | AX-148463064 |
| LMNA | rs150950685 | chr1:156,084,461-156,109,880 | AX-156285865 |
| LMNA | rs2485672   | chr1:156,084,461-156,109,880 | AX-148477606 |
| LMNA | rs2485672   | chr1:156,084,461-156,109,880 | AX-156279838 |
| LMNA | rs2475758   | chr1:156,084,461-156,109,880 | AX-156279839 |
| LMNA | rs2475758   | chr1:156,084,461-156,109,880 | AX-156295417 |
| LMNA | rs6657367   | chr1:156,084,461-156,109,880 | AX-30126967  |
| LMNA | rs593987    | chr1:156,084,461-156,109,880 | AX-113007831 |
| LMNA | rs594028    | chr1:156,084,461-156,109,880 | AX-113402749 |
| LMNA | rs594028    | chr1:156,084,461-156,109,880 | AX-113959340 |
| LMNA | rs622834    | chr1:156,084,461-156,109,880 | AX-39099875  |
| LMNA | rs623189    | chr1:156,084,461-156,109,880 | AX-30126975  |
| LMNA | rs2430417   | chr1:156,084,461-156,109,880 | AX-156266016 |
| LMNA | rs113448831 | chr1:156,084,461-156,109,880 | AX-148754045 |
| LMNA | rs113448831 | chr1:156,084,461-156,109,880 | AX-156266017 |
| LMNA | rs573739    | chr1:156,084,461-156,109,880 | AX-156266018 |
| LMNA | rs573739    | chr1:156,084,461-156,109,880 | AX-156286666 |
| LMNA | rs573735    | chr1:156,084,461-156,109,880 | AX-156266019 |
| LMNA | rs573735    | chr1:156,084,461-156,109,880 | AX-156286667 |
| LMNA | rs59351839  | chr1:156,084,461-156,109,880 | AX-30126983  |
| LMNA | rs16837187  | chr1:156,084,461-156,109,880 | AX-120364795 |
| LMNA | rs16837187  | chr1:156,084,461-156,109,880 | AX-156266020 |
| LMNA | rs528636    | chr1:156,084,461-156,109,880 | AX-39099879  |
| LMNA | rs543235    | chr1:156,084,461-156,109,880 | AX-30126987  |
| LMNA | rs79200804  | chr1:156,084,461-156,109,880 | AX-156266021 |
| LMNA | rs79200804  | chr1:156,084,461-156,109,880 | AX-156286668 |
| LMNA | ---         | chr1:156,084,461-156,109,880 | AX-30126989  |
| LMNA | rs16837193  | chr1:156,084,461-156,109,880 | AX-30126997  |
| LMNA | rs665979    | chr1:156,084,461-156,109,880 | AX-156265645 |
| LMNA | rs665979    | chr1:156,084,461-156,109,880 | AX-156265680 |
| LMNA | rs513043    | chr1:156,084,461-156,109,880 | AX-30127003  |
| LMNA | rs666869    | chr1:156,084,461-156,109,880 | AX-39099881  |
| LMNA | rs509551    | chr1:156,084,461-156,109,880 | AX-39099883  |
| LMNA | rs508641    | chr1:156,084,461-156,109,880 | AX-115124977 |
| LMNA | rs508641    | chr1:156,084,461-156,109,880 | AX-115163986 |
| LMNA | rs113265975 | chr1:156,084,461-156,109,880 | AX-151323505 |
| LMNA | rs113265975 | chr1:156,084,461-156,109,880 | AX-156286316 |
| LMNA | rs267607569 | chr1:156,084,461-156,109,880 | AX-90060400  |
| LMNA | ---         | chr1:156,084,461-156,109,880 | AX-90073624  |
| LMNA | ---         | chr1:156,084,461-156,109,880 | AX-90056249  |
| LMNA | ---         | chr1:156,084,461-156,109,880 | AX-90063106  |
| LMNA | rs61726478  | chr1:156,084,461-156,109,880 | AX-90041480  |
| LMNA | ---         | chr1:156,084,461-156,109,880 | AX-90026892  |
| LMNA | ---         | chr1:156,084,461-156,109,880 | AX-90055778  |
| LMNA | rs267607649 | chr1:156,084,461-156,109,880 | AX-90032945  |

|      |             |                              |              |
|------|-------------|------------------------------|--------------|
| LMNA | ---         | chr1:156,084,461-156,109,880 | AX-90055779  |
| LMNA | rs61661343  | chr1:156,084,461-156,109,880 | AX-88754771  |
| LMNA | rs58912633  | chr1:156,084,461-156,109,880 | AX-90070328  |
| LMNA | rs60310264  | chr1:156,084,461-156,109,880 | AX-90041457  |
| LMNA | rs80356805  | chr1:156,084,461-156,109,880 | AX-30127011  |
| LMNA | ---         | chr1:156,084,461-156,109,880 | AX-90071777  |
| LMNA | rs28933093  | chr1:156,084,461-156,109,880 | AX-90041412  |
| LMNA | rs267607594 | chr1:156,084,461-156,109,880 | AX-90031444  |
| LMNA | rs267607595 | chr1:156,084,461-156,109,880 | AX-90051413  |
| LMNA | rs267607542 | chr1:156,084,461-156,109,880 | AX-90036117  |
| LMNA | rs577492    | chr1:156,084,461-156,109,880 | AX-12590963  |
| LMNA | rs480886    | chr1:156,084,461-156,109,880 | AX-113443708 |
| LMNA | rs480886    | chr1:156,084,461-156,109,880 | AX-153404679 |
| LMNA | rs682267    | chr1:156,084,461-156,109,880 | AX-148346302 |
| LMNA | rs682267    | chr1:156,084,461-156,109,880 | AX-92735375  |
| LMNA | rs2485669   | chr1:156,084,461-156,109,880 | AX-122953736 |
| LMNA | rs2485669   | chr1:156,084,461-156,109,880 | AX-144916330 |
| LMNA | rs60659614  | chr1:156,084,461-156,109,880 | AX-151271232 |
| LMNA | rs60659614  | chr1:156,084,461-156,109,880 | AX-156269758 |
| LMNA | rs2485668   | chr1:156,084,461-156,109,880 | AX-39099893  |
| LMNA | rs2485667   | chr1:156,084,461-156,109,880 | AX-11456315  |
| LMNA | rs2485667   | chr1:156,084,461-156,109,880 | AX-149286709 |
| LMNA | rs2430416   | chr1:156,084,461-156,109,880 | AX-156270490 |
| LMNA | rs2430416   | chr1:156,084,461-156,109,880 | AX-92442759  |
| LMNA | rs2430415   | chr1:156,084,461-156,109,880 | AX-148460408 |
| LMNA | rs2430415   | chr1:156,084,461-156,109,880 | AX-156270491 |
| LMNA | rs2908712   | chr1:156,084,461-156,109,880 | AX-105052667 |
| LMNA | rs2908712   | chr1:156,084,461-156,109,880 | AX-118438758 |
| LMNA | rs2993266   | chr1:156,084,461-156,109,880 | AX-151279467 |
| LMNA | rs10158206  | chr1:156,084,461-156,109,880 | AX-156266022 |
| LMNA | rs10159320  | chr1:156,084,461-156,109,880 | AX-156266023 |
| LMNA | rs10159320  | chr1:156,084,461-156,109,880 | AX-156286670 |
| LMNA | rs10158218  | chr1:156,084,461-156,109,880 | AX-115127792 |
| LMNA | rs10158218  | chr1:156,084,461-156,109,880 | AX-115161084 |
| LMNA | rs201479816 | chr1:156,084,461-156,109,880 | AX-119325321 |
| LMNA | rs111340905 | chr1:156,084,461-156,109,880 | AX-113609617 |
| LMNA | rs111340905 | chr1:156,084,461-156,109,880 | AX-92435440  |
| LMNA | rs2485666   | chr1:156,084,461-156,109,880 | AX-156266024 |
| LMNA | rs2485666   | chr1:156,084,461-156,109,880 | AX-92569803  |
| LMNA | rs2485665   | chr1:156,084,461-156,109,880 | AX-144909254 |
| LMNA | rs2430414   | chr1:156,084,461-156,109,880 | AX-148527670 |
| LMNA | rs2430414   | chr1:156,084,461-156,109,880 | AX-156266025 |
| LMNA | rs113044442 | chr1:156,084,461-156,109,880 | AX-123031939 |
| LMNA | rs113044442 | chr1:156,084,461-156,109,880 | AX-148624245 |
| LMNA | rs56702163  | chr1:156,084,461-156,109,880 | AX-30127023  |
| LMNA | rs569025    | chr1:156,084,461-156,109,880 | AX-30127025  |
| LMNA | rs78499673  | chr1:156,084,461-156,109,880 | AX-156266026 |
| LMNA | rs78499673  | chr1:156,084,461-156,109,880 | AX-156286671 |
| LMNA | rs267607583 | chr1:156,084,461-156,109,880 | AX-90055294  |
| LMNA | rs61726479  | chr1:156,084,461-156,109,880 | AX-88754773  |
| LMNA | rs267607626 | chr1:156,084,461-156,109,880 | AX-86553269  |
| LMNA | rs59026483  | chr1:156,084,461-156,109,880 | AX-88754762  |
| LMNA | rs267607571 | chr1:156,084,461-156,109,880 | AX-90027147  |
| LMNA | ---         | chr1:156,084,461-156,109,880 | AX-88797802  |
| LMNA | ---         | chr1:156,084,461-156,109,880 | AX-90032009  |

|      |             |                              |              |
|------|-------------|------------------------------|--------------|
| LMNA | ---         | chr1:156,084,461-156,109,880 | AX-88754751  |
| LMNA | ---         | chr1:156,084,461-156,109,880 | AX-90059451  |
| LMNA | rs267607541 | chr1:156,084,461-156,109,880 | AX-90053763  |
| LMNA | rs61195471  | chr1:156,084,461-156,109,880 | AX-88754770  |
| LMNA | ---         | chr1:156,084,461-156,109,880 | AX-88777223  |
| LMNA | ---         | chr1:156,084,461-156,109,880 | AX-90037328  |
| LMNA | rs267607629 | chr1:156,084,461-156,109,880 | AX-90056726  |
| LMNA | ---         | chr1:156,084,461-156,109,880 | AX-90051650  |
| LMNA | rs267607572 | chr1:156,084,461-156,109,880 | AX-90026410  |
| LMNA | ---         | chr1:156,084,461-156,109,880 | AX-91995886  |
| LMNA | ---         | chr1:156,084,461-156,109,880 | AX-92021013  |
| LMNA | rs11264443  | chr1:156,084,461-156,109,880 | AX-30127027  |
| LMNA | ---         | chr1:156,084,461-156,109,880 | AX-90027883  |
| LMNA | rs267607584 | chr1:156,084,461-156,109,880 | AX-90026412  |
| LMNA | ---         | chr1:156,084,461-156,109,880 | AX-90026413  |
| LMNA | rs28928901  | chr1:156,084,461-156,109,880 | AX-90038279  |
| LMNA | rs58034145  | chr1:156,084,461-156,109,880 | AX-90070317  |
| LMNA | rs60682848  | chr1:156,084,461-156,109,880 | AX-88797814  |
| LMNA | rs61214927  | chr1:156,084,461-156,109,880 | AX-90070355  |
| LMNA | ---         | chr1:156,084,461-156,109,880 | AX-90057791  |
| LMNA | rs57207746  | chr1:156,084,461-156,109,880 | AX-90041424  |
| LMNA | rs267607573 | chr1:156,084,461-156,109,880 | AX-90055299  |
| LMNA | rs267607587 | chr1:156,084,461-156,109,880 | AX-90026415  |
| LMNA | rs58850446  | chr1:156,084,461-156,109,880 | AX-90041441  |
| LMNA | ---         | chr1:156,084,461-156,109,880 | AX-90070418  |
| LMNA | rs59332535  | chr1:156,084,461-156,109,880 | AX-90070336  |
| LMNA | ---         | chr1:156,084,461-156,109,880 | AX-90061820  |
| LMNA | rs58048078  | chr1:156,084,461-156,109,880 | AX-90041432  |
| LMNA | ---         | chr1:156,084,461-156,109,880 | AX-90078610  |
| LMNA | ---         | chr1:156,084,461-156,109,880 | AX-90055301  |
| LMNA | rs267607625 | chr1:156,084,461-156,109,880 | AX-90058390  |
| LMNA | rs267607593 | chr1:156,084,461-156,109,880 | AX-90055302  |
| LMNA | rs57048196  | chr1:156,084,461-156,109,880 | AX-90031110  |
| LMNA | rs267607630 | chr1:156,084,461-156,109,880 | AX-90030042  |
| LMNA | rs267607631 | chr1:156,084,461-156,109,880 | AX-90036878  |
| LMNA | rs267607632 | chr1:156,084,461-156,109,880 | AX-90059621  |
| LMNA | ---         | chr1:156,084,461-156,109,880 | AX-39099897  |
| LMNA | rs11264445  | chr1:156,084,461-156,109,880 | AX-147853047 |
| LMNA | rs11264445  | chr1:156,084,461-156,109,880 | AX-147947224 |
| LMNA | ---         | chr1:156,084,461-156,109,880 | AX-90033587  |
| LMNA | ---         | chr1:156,084,461-156,109,880 | AX-90078138  |
| LMNA | rs538089    | chr1:156,084,461-156,109,880 | AX-30127033  |
| LMNA | ---         | chr1:156,084,461-156,109,880 | AX-90050242  |
| LMNA | ---         | chr1:156,084,461-156,109,880 | AX-90065828  |
| LMNA | rs61616775  | chr1:156,084,461-156,109,880 | AX-90041477  |
| LMNA | rs267607633 | chr1:156,084,461-156,109,880 | AX-90057072  |
| LMNA | rs59885338  | chr1:156,084,461-156,109,880 | AX-88797811  |
| LMNA | rs150924946 | chr1:156,084,461-156,109,880 | AX-83451856  |
| LMNA | rs267607591 | chr1:156,084,461-156,109,880 | AX-90031345  |
| LMNA | rs267607596 | chr1:156,084,461-156,109,880 | AX-90033210  |
| LMNA | rs61527854  | chr1:156,084,461-156,109,880 | AX-90070360  |
| LMNA | ---         | chr1:156,084,461-156,109,880 | AX-90028872  |
| LMNA | ---         | chr1:156,084,461-156,109,880 | AX-90058647  |
| LMNA | rs2485664   | chr1:156,084,461-156,109,880 | AX-113476645 |
| LMNA | rs2485664   | chr1:156,084,461-156,109,880 | AX-113885432 |

|      |             |                              |              |
|------|-------------|------------------------------|--------------|
| LMNA | rs76017998  | chr1:156,084,461-156,109,880 | AX-30127035  |
| LMNA | ---         | chr1:156,084,461-156,109,880 | AX-39099901  |
| LMNA | rs267607645 | chr1:156,084,461-156,109,880 | AX-90031567  |
| LMNA | rs56816490  | chr1:156,084,461-156,109,880 | AX-90070306  |
| LMNA | rs56771886  | chr1:156,084,461-156,109,880 | AX-90053762  |
| LMNA | rs267607554 | chr1:156,084,461-156,109,880 | AX-90026418  |
| LMNA | rs56851164  | chr1:156,084,461-156,109,880 | AX-86688414  |
| LMNA | ---         | chr1:156,084,461-156,109,880 | AX-90026419  |
| LMNA | rs386134243 | chr1:156,084,461-156,109,880 | AX-90035738  |
| LMNA | rs58105277  | chr1:156,084,461-156,109,880 | AX-90041433  |
| LMNA | rs267607548 | chr1:156,084,461-156,109,880 | AX-90026420  |
| LMNA | rs267607555 | chr1:156,084,461-156,109,880 | AX-90034814  |
| LMNA | rs267607610 | chr1:156,084,461-156,109,880 | AX-90031691  |
| LMNA | ---         | chr1:156,084,461-156,109,880 | AX-90073604  |
| LMNA | rs267607623 | chr1:156,084,461-156,109,880 | AX-90055306  |
| LMNA | ---         | chr1:156,084,461-156,109,880 | AX-90027271  |
| LMNA | rs267607617 | chr1:156,084,461-156,109,880 | AX-90055307  |
| LMNA | rs267607567 | chr1:156,084,461-156,109,880 | AX-90055308  |
| LMNA | rs267607634 | chr1:156,084,461-156,109,880 | AX-90031533  |
| LMNA | rs58389804  | chr1:156,084,461-156,109,880 | AX-90082074  |
| LMNA | ---         | chr1:156,084,461-156,109,880 | AX-90074346  |
| LMNA | rs397517889 | chr1:156,084,461-156,109,880 | AX-90031126  |
| LMNA | ---         | chr1:156,084,461-156,109,880 | AX-90026895  |
| LMNA | ---         | chr1:156,084,461-156,109,880 | AX-90035641  |
| LMNA | rs121912495 | chr1:156,084,461-156,109,880 | AX-90041532  |
| LMNA | ---         | chr1:156,084,461-156,109,880 | AX-90034738  |
| LMNA | ---         | chr1:156,084,461-156,109,880 | AX-90027423  |
| LMNA | rs534807    | chr1:156,084,461-156,109,880 | AX-116090745 |
| LMNA | rs534807    | chr1:156,084,461-156,109,880 | AX-147961263 |
| LMNA | rs16837198  | chr1:156,084,461-156,109,880 | AX-30127039  |
| LMNA | rs267607561 | chr1:156,084,461-156,109,880 | AX-86674420  |
| LMNA | rs58672172  | chr1:156,084,461-156,109,880 | AX-90070325  |
| LMNA | rs61094188  | chr1:156,084,461-156,109,880 | AX-90041468  |
| LMNA | rs267607647 | chr1:156,084,461-156,109,880 | AX-90057752  |
| LMNA | rs267607618 | chr1:156,084,461-156,109,880 | AX-90055310  |
| LMNA | ---         | chr1:156,084,461-156,109,880 | AX-90079740  |
| LMNA | rs150840924 | chr1:156,084,461-156,109,880 | AX-86621648  |
| LMNA | rs62636506  | chr1:156,084,461-156,109,880 | AX-86638940  |
| LMNA | rs121912493 | chr1:156,084,461-156,109,880 | AX-90041530  |
| LMNA | ---         | chr1:156,084,461-156,109,880 | AX-90078879  |
| LMNA | rs58541611  | chr1:156,084,461-156,109,880 | AX-90041437  |
| LMNA | rs505058    | chr1:156,084,461-156,109,880 | AX-39099903  |
| LMNA | ---         | chr1:156,084,461-156,109,880 | AX-90059650  |
| LMNA | rs58932704  | chr1:156,084,461-156,109,880 | AX-86736819  |
| LMNA | rs267607598 | chr1:156,084,461-156,109,880 | AX-90027802  |
| LMNA | rs267607597 | chr1:156,084,461-156,109,880 | AX-90064435  |
| LMNA | ---         | chr1:156,084,461-156,109,880 | AX-90075774  |
| LMNA | rs60992550  | chr1:156,084,461-156,109,880 | AX-90069071  |
| LMNA | rs61235244  | chr1:156,084,461-156,109,880 | AX-90070357  |
| LMNA | rs476000    | chr1:156,084,461-156,109,880 | AX-39099905  |
| LMNA | rs267607600 | chr1:156,084,461-156,109,880 | AX-90029474  |
| LMNA | ---         | chr1:156,084,461-156,109,880 | AX-90061149  |
| LMNA | rs267607642 | chr1:156,084,461-156,109,880 | AX-90065601  |
| LMNA | rs61282106  | chr1:156,084,461-156,109,880 | AX-90070358  |
| LMNA | ---         | chr1:156,084,461-156,109,880 | AX-90067165  |

|      |             |                              |             |
|------|-------------|------------------------------|-------------|
| LMNA | rs267607578 | chr1:156,084,461-156,109,880 | AX-90056791 |
| LMNA | ---         | chr1:156,084,461-156,109,880 | AX-90075099 |
| LMNA | rs57747780  | chr1:156,084,461-156,109,880 | AX-90070313 |
| LMNA | rs57920071  | chr1:156,084,461-156,109,880 | AX-90070315 |
| LMNA | ---         | chr1:156,084,461-156,109,880 | AX-90056776 |
| LMNA | ---         | chr1:156,084,461-156,109,880 | AX-90027673 |
| LMNA | ---         | chr1:156,084,461-156,109,880 | AX-90036151 |
| LMNA | ---         | chr1:156,084,461-156,109,880 | AX-90061381 |
| LMNA | rs56699480  | chr1:156,084,461-156,109,880 | AX-90041418 |
| LMNA | rs267607640 | chr1:156,084,461-156,109,880 | AX-90027761 |
| LMNA | ---         | chr1:156,084,461-156,109,880 | AX-90063138 |
| LMNA | rs553016    | chr1:156,084,461-156,109,880 | AX-39099907 |
| LMNA | rs60556110  | chr1:156,084,461-156,109,880 | AX-90048799 |
| LMNA | rs57730570  | chr1:156,084,461-156,109,880 | AX-90035675 |
| LMNA | rs267607580 | chr1:156,084,461-156,109,880 | AX-90049209 |
| LMNA | rs267607553 | chr1:156,084,461-156,109,880 | AX-90046858 |
| LMNA | rs267607565 | chr1:156,084,461-156,109,880 | AX-90035351 |
| LMNA | rs57877560  | chr1:156,084,461-156,109,880 | AX-90070314 |
| LMNA | ---         | chr1:156,084,461-156,109,880 | AX-90062851 |
| LMNA | rs267607557 | chr1:156,084,461-156,109,880 | AX-90029987 |
| LMNA | rs58362413  | chr1:156,084,461-156,109,880 | AX-90041435 |
| LMNA | rs201583907 | chr1:156,084,461-156,109,880 | AX-83038703 |
| LMNA | rs57318642  | chr1:156,084,461-156,109,880 | AX-90041425 |
| LMNA | ---         | chr1:156,084,461-156,109,880 | AX-86713456 |
| LMNA | ---         | chr1:156,084,461-156,109,880 | AX-90026897 |
| LMNA | ---         | chr1:156,084,461-156,109,880 | AX-90035052 |
| LMNA | ---         | chr1:156,084,461-156,109,880 | AX-90058322 |
| LMNA | rs121912494 | chr1:156,084,461-156,109,880 | AX-90041531 |
| LMNA | rs60580541  | chr1:156,084,461-156,109,880 | AX-90041460 |
| LMNA | rs60934003  | chr1:156,084,461-156,109,880 | AX-90041464 |
| LMNA | rs267607592 | chr1:156,084,461-156,109,880 | AX-90029430 |
| LMNA | ---         | chr1:156,084,461-156,109,880 | AX-90030229 |
| LMNA | rs267607539 | chr1:156,084,461-156,109,880 | AX-90033395 |
| LMNA | rs267607581 | chr1:156,084,461-156,109,880 | AX-90065095 |
| LMNA | rs267607547 | chr1:156,084,461-156,109,880 | AX-90065867 |
| LMNA | ---         | chr1:156,084,461-156,109,880 | AX-90062651 |
| LMNA | ---         | chr1:156,084,461-156,109,880 | AX-90070359 |
| LMNA | rs56673169  | chr1:156,084,461-156,109,880 | AX-90070302 |
| LMNA | rs267607613 | chr1:156,084,461-156,109,880 | AX-90057893 |
| LMNA | rs4641      | chr1:156,084,461-156,109,880 | AX-83578059 |
| LMNA | ---         | chr1:156,084,461-156,109,880 | AX-90060582 |
| LMNA | rs520973    | chr1:156,084,461-156,109,880 | AX-39099915 |
| LMNA | rs520910    | chr1:156,084,461-156,109,880 | AX-30127041 |
| LMNA | rs61224243  | chr1:156,084,461-156,109,880 | AX-90070356 |
| LMNA | ---         | chr1:156,084,461-156,109,880 | AX-90027440 |
| LMNA | rs267607556 | chr1:156,084,461-156,109,880 | AX-90065400 |
| LMNA | ---         | chr1:156,084,461-156,109,880 | AX-86616208 |
| LMNA | rs59886214  | chr1:156,084,461-156,109,880 | AX-88754767 |
| LMNA | rs61064130  | chr1:156,084,461-156,109,880 | AX-90070352 |
| LMNA | rs59267781  | chr1:156,084,461-156,109,880 | AX-90041448 |
| LMNA | rs140455668 | chr1:156,084,461-156,109,880 | AX-86617665 |
| LMNA | ---         | chr1:156,084,461-156,109,880 | AX-90030464 |
| LMNA | rs267607612 | chr1:156,084,461-156,109,880 | AX-90058146 |
| LMNA | ---         | chr1:156,084,461-156,109,880 | AX-90058246 |
| LMNA | rs368386019 | chr1:156,084,461-156,109,880 | AX-86547734 |

|       |             |                              |              |
|-------|-------------|------------------------------|--------------|
| LMNA  | rs267607544 | chr1:156,084,461-156,109,880 | AX-90059330  |
| LMNA  | ---         | chr1:156,084,461-156,109,880 | AX-84989008  |
| LMNA  | rs80264244  | chr1:156,084,461-156,109,880 | AX-30127045  |
| LMNA  | rs7339      | chr1:156,084,461-156,109,880 | AX-147869531 |
| LMNA  | rs7339      | chr1:156,084,461-156,109,880 | AX-84989430  |
| LMNA  | rs74116489  | chr1:156,084,461-156,109,880 | AX-121928444 |
| LMNA  | rs74116489  | chr1:156,084,461-156,109,880 | AX-156266027 |
| LMNA  | rs111601180 | chr1:156,084,461-156,109,880 | AX-156268994 |
| LMNA  | rs111601180 | chr1:156,084,461-156,109,880 | AX-156288596 |
| MURC  | ---         | chr9:103,340,336-103,350,173 | AX-83305959  |
| MURC  | rs200457015 | chr9:103,340,336-103,350,173 | AX-83259807  |
| MURC  | ---         | chr9:103,340,336-103,350,173 | AX-86648823  |
| MURC  | rs370997194 | chr9:103,340,336-103,350,173 | AX-86652965  |
| MURC  | ---         | chr9:103,340,336-103,350,173 | AX-90063588  |
| MURC  | rs10989164  | chr9:103,340,336-103,350,173 | AX-11136615  |
| MYBP3 | rs12046163  | chr1:236,849,770-236,927,558 | AX-156280020 |
| MYBP3 | rs12046163  | chr1:236,849,770-236,927,558 | AX-156295547 |
| MYBP3 | rs644401    | chr1:236,849,770-236,927,558 | AX-16947808  |
| MYBP3 | rs707220    | chr1:236,849,770-236,927,558 | AX-30720957  |
| MYBP3 | rs707219    | chr1:236,849,770-236,927,558 | AX-39409565  |
| MYBP3 | rs79277266  | chr1:236,849,770-236,927,558 | AX-16947813  |
| MYBP3 | rs12724121  | chr1:236,849,770-236,927,558 | AX-30720959  |
| MYBP3 | rs189051620 | chr1:236,849,770-236,927,558 | AX-151153472 |
| MYBP3 | rs189051620 | chr1:236,849,770-236,927,558 | AX-156283210 |
| MYBP3 | rs79542980  | chr1:236,849,770-236,927,558 | AX-16947819  |
| MYBP3 | rs4659701   | chr1:236,849,770-236,927,558 | AX-50103981  |
| MYBP3 | rs697660    | chr1:236,849,770-236,927,558 | AX-39409567  |
| MYBP3 | rs75356518  | chr1:236,849,770-236,927,558 | AX-16947822  |
| MYBP3 | rs1768048   | chr1:236,849,770-236,927,558 | AX-156270945 |
| MYBP3 | rs12142143  | chr1:236,849,770-236,927,558 | AX-30720975  |
| MYBP3 | rs3851907   | chr1:236,849,770-236,927,558 | AX-39409569  |
| MYBP3 | rs17648708  | chr1:236,849,770-236,927,558 | AX-11333100  |
| MYBP3 | rs3906614   | chr1:236,849,770-236,927,558 | AX-39409571  |
| MYBP3 | rs35643176  | chr1:236,849,770-236,927,558 | AX-30720977  |
| MYBP3 | rs9943223   | chr1:236,849,770-236,927,558 | AX-39409575  |
| MYBP3 | rs6688531   | chr1:236,849,770-236,927,558 | AX-148582234 |
| MYBP3 | rs6688531   | chr1:236,849,770-236,927,558 | AX-156270946 |
| MYBP3 | rs71721494  | chr1:236,849,770-236,927,558 | AX-16947839  |
| MYBP3 | rs75441357  | chr1:236,849,770-236,927,558 | AX-16947841  |
| MYBP3 | rs7530968   | chr1:236,849,770-236,927,558 | AX-113568711 |
| MYBP3 | rs10802555  | chr1:236,849,770-236,927,558 | AX-107906340 |
| MYBP3 | rs12736189  | chr1:236,849,770-236,927,558 | AX-16947848  |
| MYBP3 | rs707217    | chr1:236,849,770-236,927,558 | AX-39409589  |
| MYBP3 | rs10802556  | chr1:236,849,770-236,927,558 | AX-156289606 |
| MYBP3 | rs707216    | chr1:236,849,770-236,927,558 | AX-11604875  |
| MYBP3 | rs16834213  | chr1:236,849,770-236,927,558 | AX-16947851  |
| MYBP3 | rs78913129  | chr1:236,849,770-236,927,558 | AX-30721021  |
| MYBP3 | rs707213    | chr1:236,849,770-236,927,558 | AX-39409595  |
| MYBP3 | rs10754581  | chr1:236,849,770-236,927,558 | AX-156270948 |
| MYBP3 | rs10754581  | chr1:236,849,770-236,927,558 | AX-156289607 |
| MYBP3 | rs10925201  | chr1:236,849,770-236,927,558 | AX-156270949 |
| MYBP3 | rs12025491  | chr1:236,849,770-236,927,558 | AX-11186853  |
| MYBP3 | rs707211    | chr1:236,849,770-236,927,558 | AX-39409601  |
| MYBP3 | rs697658    | chr1:236,849,770-236,927,558 | AX-11598491  |
| MYBP3 | rs111688304 | chr1:236,849,770-236,927,558 | AX-113120727 |

|       |             |                              |              |
|-------|-------------|------------------------------|--------------|
| MYBP3 | rs111688304 | chr1:236,849,770-236,927,558 | AX-114050383 |
| MYBP3 | rs79108886  | chr1:236,849,770-236,927,558 | AX-30721029  |
| MYBP3 | rs707210    | chr1:236,849,770-236,927,558 | AX-16947864  |
| MYBP3 | rs6672960   | chr1:236,849,770-236,927,558 | AX-11577504  |
| MYBP3 | ---         | chr1:236,849,770-236,927,558 | AX-156286039 |
| MYBP3 | rs12130358  | chr1:236,849,770-236,927,558 | AX-156270950 |
| MYBP3 | ---         | chr1:236,849,770-236,927,558 | AX-105090306 |
| MYBP3 | rs7539291   | chr1:236,849,770-236,927,558 | AX-148423773 |
| MYBP3 | rs7539291   | chr1:236,849,770-236,927,558 | AX-156270484 |
| MYBP3 | rs819645    | chr1:236,849,770-236,927,558 | AX-122591189 |
| MYBP3 | ---         | chr1:236,849,770-236,927,558 | AX-119954925 |
| MYBP3 | rs819646    | chr1:236,849,770-236,927,558 | AX-119369222 |
| MYBP3 | rs819646    | chr1:236,849,770-236,927,558 | AX-153809006 |
| MYBP3 | rs819647    | chr1:236,849,770-236,927,558 | AX-156289608 |
| MYBP3 | rs4659702   | chr1:236,849,770-236,927,558 | AX-30721041  |
| MYBP3 | rs12403616  | chr1:236,849,770-236,927,558 | AX-39409613  |
| MYBP3 | rs12037773  | chr1:236,849,770-236,927,558 | AX-30721057  |
| MYBP3 | rs7516579   | chr1:236,849,770-236,927,558 | AX-156270954 |
| MYBP3 | rs7516579   | chr1:236,849,770-236,927,558 | AX-156289609 |
| MYBP3 | rs4659706   | chr1:236,849,770-236,927,558 | AX-151160186 |
| MYBP3 | rs112267838 | chr1:236,849,770-236,927,558 | AX-105112175 |
| MYBP3 | rs61831762  | chr1:236,849,770-236,927,558 | AX-113126688 |
| MYBP3 | rs35235564  | chr1:236,849,770-236,927,558 | AX-11460533  |
| MYBP3 | rs1613395   | chr1:236,849,770-236,927,558 | AX-16947875  |
| MYBP3 | ---         | chr1:236,849,770-236,927,558 | AX-12459972  |
| MYBP3 | rs10925204  | chr1:236,849,770-236,927,558 | AX-113120728 |
| MYBP3 | rs10925204  | chr1:236,849,770-236,927,558 | AX-113568712 |
| MYBP3 | rs61643696  | chr1:236,849,770-236,927,558 | AX-37445855  |
| MYBP3 | rs1773444   | chr1:236,849,770-236,927,558 | AX-12504019  |
| MYBP3 | rs1341861   | chr1:236,849,770-236,927,558 | AX-39409633  |
| MYBP3 | rs1341860   | chr1:236,849,770-236,927,558 | AX-39409635  |
| MYBP3 | rs66469169  | chr1:236,849,770-236,927,558 | AX-156284584 |
| MYBP3 | rs112736198 | chr1:236,849,770-236,927,558 | AX-156270585 |
| MYBP3 | rs112967359 | chr1:236,849,770-236,927,558 | AX-151408412 |
| MYBP3 | rs1652224   | chr1:236,849,770-236,927,558 | AX-113575750 |
| MYBP3 | rs1652224   | chr1:236,849,770-236,927,558 | AX-11442068  |
| MYBP3 | rs947449    | chr1:236,849,770-236,927,558 | AX-113568713 |
| MYBP3 | rs947449    | chr1:236,849,770-236,927,558 | AX-113603858 |
| MYBP3 | ---         | chr1:236,849,770-236,927,558 | AX-151130937 |
| MYBP3 | ---         | chr1:236,849,770-236,927,558 | AX-151411135 |
| MYBP3 | rs1622149   | chr1:236,849,770-236,927,558 | AX-113603859 |
| MYBP3 | rs1622149   | chr1:236,849,770-236,927,558 | AX-114050385 |
| MYBP3 | rs2914919   | chr1:236,849,770-236,927,558 | AX-39409657  |
| MYBP3 | rs2995046   | chr1:236,849,770-236,927,558 | AX-39409659  |
| MYBP3 | rs1652223   | chr1:236,849,770-236,927,558 | AX-11280237  |
| MYBP3 | rs2794748   | chr1:236,849,770-236,927,558 | AX-113557744 |
| MYBP3 | rs2794748   | chr1:236,849,770-236,927,558 | AX-114074373 |
| MYBP3 | rs12751677  | chr1:236,849,770-236,927,558 | AX-39409667  |
| MYBP3 | rs1934690   | chr1:236,849,770-236,927,558 | AX-148780390 |
| MYBP3 | rs1934690   | chr1:236,849,770-236,927,558 | AX-149312612 |
| MYBP3 | rs1934689   | chr1:236,849,770-236,927,558 | AX-148780500 |
| MYBP3 | rs1934689   | chr1:236,849,770-236,927,558 | AX-156270957 |
| MYBP3 | rs200821726 | chr1:236,849,770-236,927,558 | AX-156284720 |
| MYBP3 | ---         | chr1:236,849,770-236,927,558 | AX-11604865  |
| MYBP3 | rs2564765   | chr1:236,849,770-236,927,558 | AX-16947895  |



|       |             |                              |              |
|-------|-------------|------------------------------|--------------|
| MYBP3 | rs36115575  | chr1:236,849,770-236,927,558 | AX-156270958 |
| MYBP3 | ---         | chr1:236,849,770-236,927,558 | AX-113214714 |
| MYBP3 | rs819639    | chr1:236,849,770-236,927,558 | AX-12651762  |
| MYBP3 | rs707206    | chr1:236,849,770-236,927,558 | AX-16947907  |
| MYBP3 | rs819725    | chr1:236,849,770-236,927,558 | AX-122962783 |
| MYBP3 | rs819642    | chr1:236,849,770-236,927,558 | AX-16947908  |
| MYBP3 | rs16834283  | chr1:236,849,770-236,927,558 | AX-11282186  |
| MYBP3 | rs707205    | chr1:236,849,770-236,927,558 | AX-11604863  |
| MYBP3 | rs12048865  | chr1:236,849,770-236,927,558 | AX-39409687  |
| MYBP3 | rs707204    | chr1:236,849,770-236,927,558 | AX-39409689  |
| MYBP3 | rs12569148  | chr1:236,849,770-236,927,558 | AX-16947911  |
| MYBP3 | rs16834301  | chr1:236,849,770-236,927,558 | AX-156270961 |
| MYBP3 | rs16834301  | chr1:236,849,770-236,927,558 | AX-156289613 |
| MYBP3 | rs6428968   | chr1:236,849,770-236,927,558 | AX-16947914  |
| MYBP3 | rs2288600   | chr1:236,849,770-236,927,558 | AX-12524429  |
| MYBP3 | rs4659709   | chr1:236,849,770-236,927,558 | AX-16947917  |
| MYBP3 | rs3768123   | chr1:236,849,770-236,927,558 | AX-16947918  |
| MYBP3 | rs76145476  | chr1:236,849,770-236,927,558 | AX-16947919  |
| MYBP3 | rs11355106  | chr1:236,849,770-236,927,558 | AX-156289614 |
| MYBP3 | rs7542508   | chr1:236,849,770-236,927,558 | AX-39409701  |
| MYBP3 | rs10925209  | chr1:236,849,770-236,927,558 | AX-11131996  |
| MYBP3 | rs12164643  | chr1:236,849,770-236,927,558 | AX-16947921  |
| MYBP3 | rs12137719  | chr1:236,849,770-236,927,558 | AX-16947923  |
| MYBP3 | rs12139278  | chr1:236,849,770-236,927,558 | AX-148157195 |
| MYBP3 | rs12139278  | chr1:236,849,770-236,927,558 | AX-156270963 |
| MYBP3 | rs12141939  | chr1:236,849,770-236,927,558 | AX-148148828 |
| MYBP3 | rs202167251 | chr1:236,849,770-236,927,558 | AX-156285778 |
| MYBP3 | rs12119844  | chr1:236,849,770-236,927,558 | AX-156270962 |
| MYBP3 | rs12138531  | chr1:236,849,770-236,927,558 | AX-148055127 |
| MYBP3 | rs4659710   | chr1:236,849,770-236,927,558 | AX-148164463 |
| MYBP3 | rs4659710   | chr1:236,849,770-236,927,558 | AX-92461107  |
| MYBP3 | rs4659711   | chr1:236,849,770-236,927,558 | AX-12576856  |
| MYBP3 | ---         | chr1:236,849,770-236,927,558 | AX-42810105  |
| MYBP3 | rs7544174   | chr1:236,849,770-236,927,558 | AX-12631547  |
| MYBP3 | rs2385493   | chr1:236,849,770-236,927,558 | AX-151171827 |
| MYBP3 | rs2891794   | chr1:236,849,770-236,927,558 | AX-148157140 |
| MYBP3 | rs2385496   | chr1:236,849,770-236,927,558 | AX-148161915 |
| MYBP3 | rs7555260   | chr1:236,849,770-236,927,558 | AX-156270968 |
| MYBP3 | rs12137069  | chr1:236,849,770-236,927,558 | AX-156289617 |
| MYBP3 | rs140346044 | chr1:236,849,770-236,927,558 | AX-156285352 |
| MYBP3 | rs35956798  | chr1:236,849,770-236,927,558 | AX-16947936  |
| MYBP3 | rs7553165   | chr1:236,849,770-236,927,558 | AX-11629303  |
| MYBP3 | rs4659466   | chr1:236,849,770-236,927,558 | AX-16947944  |
| MYBP3 | rs12048046  | chr1:236,849,770-236,927,558 | AX-39409735  |
| MYBP3 | rs3818884   | chr1:236,849,770-236,927,558 | AX-16947947  |
| MYBP3 | rs3818883   | chr1:236,849,770-236,927,558 | AX-11483133  |
| MYBP3 | rs112529745 | chr1:236,849,770-236,927,558 | AX-16947948  |
| MYBP3 | rs4659712   | chr1:236,849,770-236,927,558 | AX-123026531 |
| MYBP3 | rs10925212  | chr1:236,849,770-236,927,558 | AX-123026532 |
| MYBP3 | rs10925212  | chr1:236,849,770-236,927,558 | AX-92755613  |
| MYBP3 | rs2385498   | chr1:236,849,770-236,927,558 | AX-16947951  |
| MYBP3 | rs149494099 | chr1:236,849,770-236,927,558 | AX-151433191 |
| MYBP3 | rs149494099 | chr1:236,849,770-236,927,558 | AX-156285368 |
| MYBP3 | rs141984611 | chr1:236,849,770-236,927,558 | AX-151453442 |
| MYBP3 | rs3738544   | chr1:236,849,770-236,927,558 | AX-16947954  |

|       |             |                              |              |
|-------|-------------|------------------------------|--------------|
| MYBP3 | rs3738545   | chr1:236,849,770-236,927,558 | AX-16947955  |
| MYBP3 | ---         | chr1:236,849,770-236,927,558 | AX-90031268  |
| MYBP3 | rs4659713   | chr1:236,849,770-236,927,558 | AX-16947956  |
| MYBP3 | rs6668769   | chr1:236,849,770-236,927,558 | AX-156289620 |
| MYBP3 | rs111391247 | chr1:236,849,770-236,927,558 | AX-151206248 |
| MYBP3 | rs111391247 | chr1:236,849,770-236,927,558 | AX-156284767 |
| MYBP3 | rs6677567   | chr1:236,849,770-236,927,558 | AX-92545609  |
| MYBP3 | rs10802559  | chr1:236,849,770-236,927,558 | AX-156270972 |
| MYBP3 | rs10737811  | chr1:236,849,770-236,927,558 | AX-11117721  |
| MYBP3 | ---         | chr1:236,849,770-236,927,558 | AX-90060085  |
| MYBP3 | rs60012915  | chr1:236,849,770-236,927,558 | AX-16947962  |
| MYBP3 | rs2297858   | chr1:236,849,770-236,927,558 | AX-30721225  |
| MYBP3 | rs2297859   | chr1:236,849,770-236,927,558 | AX-113705113 |
| MYBP3 | rs2297859   | chr1:236,849,770-236,927,558 | AX-156295549 |
| MYBP3 | rs116518554 | chr1:236,849,770-236,927,558 | AX-156270974 |
| MYBP3 | rs116518554 | chr1:236,849,770-236,927,558 | AX-156289621 |
| MYBP3 | rs2297861   | chr1:236,849,770-236,927,558 | AX-30721233  |
| MYBP3 | rs3768127   | chr1:236,849,770-236,927,558 | AX-156270975 |
| MYBP3 | rs78597259  | chr1:236,849,770-236,927,558 | AX-156271211 |
| MYBP3 | rs12728992  | chr1:236,849,770-236,927,558 | AX-120532796 |
| MYBP3 | rs10925221  | chr1:236,849,770-236,927,558 | AX-12401077  |
| MYBP3 | rs143296056 | chr1:236,849,770-236,927,558 | AX-148054739 |
| MYBP3 | rs35311500  | chr1:236,849,770-236,927,558 | AX-151373865 |
| MYBP3 | rs10925222  | chr1:236,849,770-236,927,558 | AX-148292691 |
| MYBP3 | rs10925222  | chr1:236,849,770-236,927,558 | AX-156270979 |
| MYBP3 | rs12729393  | chr1:236,849,770-236,927,558 | AX-30721241  |
| MYBP3 | rs7534128   | chr1:236,849,770-236,927,558 | AX-156270980 |
| MYBP3 | rs7534128   | chr1:236,849,770-236,927,558 | AX-156289624 |
| MYBP3 | rs11811121  | chr1:236,849,770-236,927,558 | AX-39409755  |
| MYBP3 | rs370677725 | chr1:236,849,770-236,927,558 | AX-86605346  |
| MYBP3 | rs200469353 | chr1:236,849,770-236,927,558 | AX-86561448  |
| MYBP3 | rs12730862  | chr1:236,849,770-236,927,558 | AX-156289625 |
| MYBP3 | rs10925223  | chr1:236,849,770-236,927,558 | AX-156270982 |
| MYBP3 | rs10925223  | chr1:236,849,770-236,927,558 | AX-92508984  |
| MYBP3 | rs4348712   | chr1:236,849,770-236,927,558 | AX-156270983 |
| MYBP3 | rs12735607  | chr1:236,849,770-236,927,558 | AX-39409757  |
| MYBP3 | ---         | chr1:236,849,770-236,927,558 | AX-90046968  |
| MYBP3 | rs2282366   | chr1:236,849,770-236,927,558 | AX-16947972  |
| MYBP3 | rs201400656 | chr1:236,849,770-236,927,558 | AX-105084400 |
| MYBP3 | rs201400656 | chr1:236,849,770-236,927,558 | AX-16947973  |
| MYBP3 | rs12063382  | chr1:236,849,770-236,927,558 | AX-30721255  |
| MYBP3 | rs199921605 | chr1:236,849,770-236,927,558 | AX-156284164 |
| MYBP3 | rs1051253   | chr1:236,849,770-236,927,558 | AX-42810107  |
| MYBP3 | rs1803032   | chr1:236,849,770-236,927,558 | AX-147808280 |
| MYBP3 | rs7532533   | chr1:236,849,770-236,927,558 | AX-16947977  |
| MYH6  | rs28488316  | chr14:23,851,199-23,877,486  | AX-114207420 |
| MYH6  | rs453361    | chr14:23,851,199-23,877,486  | AX-39732455  |
| MYH6  | ---         | chr14:23,851,199-23,877,486  | AX-31312035  |
| MYH6  | rs10135780  | chr14:23,851,199-23,877,486  | AX-31312037  |
| MYH6  | rs17091268  | chr14:23,851,199-23,877,486  | AX-39732457  |
| MYH6  | rs17091278  | chr14:23,851,199-23,877,486  | AX-31312039  |
| MYH6  | rs138720701 | chr14:23,851,199-23,877,486  | AX-88753529  |
| MYH6  | rs35182223  | chr14:23,851,199-23,877,486  | AX-156271306 |
| MYH6  | rs35182223  | chr14:23,851,199-23,877,486  | AX-156289835 |
| MYH6  | rs11624298  | chr14:23,851,199-23,877,486  | AX-39732459  |

|      |             |                             |              |
|------|-------------|-----------------------------|--------------|
| MYH6 | rs73604564  | chr14:23,851,199-23,877,486 | AX-113242641 |
| MYH6 | rs73604564  | chr14:23,851,199-23,877,486 | AX-156271307 |
| MYH6 | rs8006357   | chr14:23,851,199-23,877,486 | AX-11659411  |
| MYH6 | rs8004990   | chr14:23,851,199-23,877,486 | AX-39732463  |
| MYH6 | rs178637    | chr14:23,851,199-23,877,486 | AX-12725249  |
| MYH6 | rs178638    | chr14:23,851,199-23,877,486 | AX-39732465  |
| MYH6 | ---         | chr14:23,851,199-23,877,486 | AX-156284976 |
| MYH6 | rs58671554  | chr14:23,851,199-23,877,486 | AX-156298612 |
| MYH6 | rs17091352  | chr14:23,851,199-23,877,486 | AX-39732467  |
| MYH6 | rs382872    | chr14:23,851,199-23,877,486 | AX-39732469  |
| MYH6 | rs28730764  | chr14:23,851,199-23,877,486 | AX-120377837 |
| MYH6 | rs28730764  | chr14:23,851,199-23,877,486 | AX-156271308 |
| MYH6 | rs45520434  | chr14:23,851,199-23,877,486 | AX-156271309 |
| MYH6 | rs396024    | chr14:23,851,199-23,877,486 | AX-156265652 |
| MYH6 | rs396024    | chr14:23,851,199-23,877,486 | AX-156265687 |
| MYH6 | rs178640    | chr14:23,851,199-23,877,486 | AX-91983191  |
| MYH6 | rs178640    | chr14:23,851,199-23,877,486 | AX-92008318  |
| MYH6 | rs61742476  | chr14:23,851,199-23,877,486 | AX-83575136  |
| MYH6 | rs2071634   | chr14:23,851,199-23,877,486 | AX-92449788  |
| MYH6 | rs2071634   | chr14:23,851,199-23,877,486 | AX-92660811  |
| MYH6 | rs17091383  | chr14:23,851,199-23,877,486 | AX-39732473  |
| MYH6 | rs17091385  | chr14:23,851,199-23,877,486 | AX-113725977 |
| MYH6 | rs17091385  | chr14:23,851,199-23,877,486 | AX-147878856 |
| MYH6 | rs59556853  | chr14:23,851,199-23,877,486 | AX-31312061  |
| MYH6 | rs12893772  | chr14:23,851,199-23,877,486 | AX-11230781  |
| MYH6 | rs178641    | chr14:23,851,199-23,877,486 | AX-31312063  |
| MYH6 | rs60867292  | chr14:23,851,199-23,877,486 | AX-31312065  |
| MYH6 | rs34855944  | chr14:23,851,199-23,877,486 | AX-31312069  |
| MYH6 | rs178642    | chr14:23,851,199-23,877,486 | AX-39732479  |
| MYH6 | rs8022522   | chr14:23,851,199-23,877,486 | AX-39732481  |
| MYH6 | ---         | chr14:23,851,199-23,877,486 | AX-86650469  |
| MYH6 | rs137983703 | chr14:23,851,199-23,877,486 | AX-86644152  |
| MYH6 | rs145611185 | chr14:23,851,199-23,877,486 | AX-82890843  |
| MYH6 | ---         | chr14:23,851,199-23,877,486 | AX-90054783  |
| MYH6 | rs148558068 | chr14:23,851,199-23,877,486 | AX-83474886  |
| MYH6 | rs34935550  | chr14:23,851,199-23,877,486 | AX-31312087  |
| MYH6 | ---         | chr14:23,851,199-23,877,486 | AX-90054784  |
| MYH6 | rs112405990 | chr14:23,851,199-23,877,486 | AX-31312093  |
| MYH6 | rs10147618  | chr14:23,851,199-23,877,486 | AX-39732487  |
| MYH6 | rs365990    | chr14:23,851,199-23,877,486 | AX-39732489  |
| MYH6 | rs267606904 | chr14:23,851,199-23,877,486 | AX-86699436  |
| MYH6 | rs17091453  | chr14:23,851,199-23,877,486 | AX-39732491  |
| MYH6 | rs143978652 | chr14:23,851,199-23,877,486 | AX-83485655  |
| MYH6 | rs28730772  | chr14:23,851,199-23,877,486 | AX-31312109  |
| MYH6 | rs28730773  | chr14:23,851,199-23,877,486 | AX-31312113  |
| MYH6 | ---         | chr14:23,851,199-23,877,486 | AX-86624252  |
| MYH6 | rs201193346 | chr14:23,851,199-23,877,486 | AX-83463949  |
| MYH6 | rs267606906 | chr14:23,851,199-23,877,486 | AX-90025900  |
| MYH6 | rs267606903 | chr14:23,851,199-23,877,486 | AX-90054786  |
| MYH6 | rs445754    | chr14:23,851,199-23,877,486 | AX-39732493  |
| MYH6 | rs10149522  | chr14:23,851,199-23,877,486 | AX-39732495  |
| MYH6 | rs10149618  | chr14:23,851,199-23,877,486 | AX-113725979 |
| MYH6 | rs10149618  | chr14:23,851,199-23,877,486 | AX-156271310 |
| MYH6 | rs422068    | chr14:23,851,199-23,877,486 | AX-122834568 |
| MYH6 | rs422068    | chr14:23,851,199-23,877,486 | AX-156271311 |

|      |             |                             |              |
|------|-------------|-----------------------------|--------------|
| MYH6 | rs9323314   | chr14:23,851,199-23,877,486 | AX-96945480  |
| MYH6 | rs267606907 | chr14:23,851,199-23,877,486 | AX-86544964  |
| MYH6 | rs452036    | chr14:23,851,199-23,877,486 | AX-83027825  |
| MYH6 | ---         | chr14:23,851,199-23,877,486 | AX-90025902  |
| MYH6 | ---         | chr14:23,851,199-23,877,486 | AX-86626993  |
| MYH6 | rs17256246  | chr14:23,851,199-23,877,486 | AX-39732503  |
| MYH6 | rs412768    | chr14:23,851,199-23,877,486 | AX-92574406  |
| MYH6 | rs412768    | chr14:23,851,199-23,877,486 | AX-92785429  |
| MYH6 | rs28730775  | chr14:23,851,199-23,877,486 | AX-31312125  |
| MYH6 | rs17091535  | chr14:23,851,199-23,877,486 | AX-39732509  |
| MYH6 | rs142992009 | chr14:23,851,199-23,877,486 | AX-83104128  |
| MYH6 | rs367663906 | chr14:23,851,199-23,877,486 | AX-86600385  |
| MYH6 | ---         | chr14:23,851,199-23,877,486 | AX-90060714  |
| MYH6 | rs439735    | chr14:23,851,199-23,877,486 | AX-39732511  |
| MYH6 | rs17091555  | chr14:23,851,199-23,877,486 | AX-39732513  |
| MYH6 | rs403739    | chr14:23,851,199-23,877,486 | AX-148202797 |
| MYH6 | rs403739    | chr14:23,851,199-23,877,486 | AX-156280247 |
| MYH6 | rs403720    | chr14:23,851,199-23,877,486 | AX-31312135  |
| MYH6 | rs376439    | chr14:23,851,199-23,877,486 | AX-31312137  |
| MYH6 | ---         | chr14:23,851,199-23,877,486 | AX-90054788  |
| MYH6 | rs28730776  | chr14:23,851,199-23,877,486 | AX-31312141  |
| MYH6 | rs57166503  | chr14:23,851,199-23,877,486 | AX-31312143  |
| MYH6 | rs28671012  | chr14:23,851,199-23,877,486 | AX-113872552 |
| MYH6 | rs28671012  | chr14:23,851,199-23,877,486 | AX-156271312 |
| MYH6 | rs432256    | chr14:23,851,199-23,877,486 | AX-31312149  |
| MYH6 | rs28730777  | chr14:23,851,199-23,877,486 | AX-31312153  |
| MYH6 | rs78107039  | chr14:23,851,199-23,877,486 | AX-31312161  |
| MYH6 | rs17091623  | chr14:23,851,199-23,877,486 | AX-39732517  |
| MYH6 | rs17091631  | chr14:23,851,199-23,877,486 | AX-31312163  |
| MYH6 | rs434273    | chr14:23,851,199-23,877,486 | AX-31312167  |
| MYH6 | ---         | chr14:23,851,199-23,877,486 | AX-90054789  |
| MYH6 | rs11850295  | chr14:23,851,199-23,877,486 | AX-39732519  |
| MYH6 | rs388914    | chr14:23,851,199-23,877,486 | AX-39732521  |
| MYH6 | rs12889823  | chr14:23,851,199-23,877,486 | AX-39732525  |
| MYH6 | ---         | chr14:23,851,199-23,877,486 | AX-90025905  |
| MYH6 | rs142027794 | chr14:23,851,199-23,877,486 | AX-83078661  |
| MYH6 | rs440466    | chr14:23,851,199-23,877,486 | AX-39732527  |
| MYH6 | rs2277473   | chr14:23,851,199-23,877,486 | AX-39732529  |
| MYH6 | rs2277474   | chr14:23,851,199-23,877,486 | AX-39732531  |
| MYH6 | rs77135504  | chr14:23,851,199-23,877,486 | AX-92392643  |
| MYH6 | rs77135504  | chr14:23,851,199-23,877,486 | AX-92603666  |
| MYH6 | rs76358702  | chr14:23,851,199-23,877,486 | AX-31312183  |
| MYH6 | rs7148253   | chr14:23,851,199-23,877,486 | AX-39732535  |
| MYH6 | rs7148648   | chr14:23,851,199-23,877,486 | AX-11610120  |
| MYH6 | rs7153499   | chr14:23,851,199-23,877,486 | AX-39732537  |
| MYH6 | rs7147244   | chr14:23,851,199-23,877,486 | AX-39732539  |
| MYH6 | rs28711516  | chr14:23,851,199-23,877,486 | AX-11422655  |
| MYH6 | ---         | chr14:23,851,199-23,877,486 | AX-90056644  |
| MYH6 | rs28730780  | chr14:23,851,199-23,877,486 | AX-31312199  |
| MYH6 | rs58008413  | chr14:23,851,199-23,877,486 | AX-84745521  |
| MYH6 | rs58008413  | chr14:23,851,199-23,877,486 | AX-84745522  |
| MYH7 | ---         | chr14:23,881,947-23,904,870 | AX-90048898  |
| MYH7 | rs2284651   | chr14:23,881,947-23,904,870 | AX-39732559  |
| MYH7 | rs7149517   | chr14:23,881,947-23,904,870 | AX-123053734 |
| MYH7 | rs7149517   | chr14:23,881,947-23,904,870 | AX-123053735 |

|      |             |                             |              |
|------|-------------|-----------------------------|--------------|
| MYH7 | rs12882128  | chr14:23,881,947-23,904,870 | AX-50150993  |
| MYH7 | rs7145543   | chr14:23,881,947-23,904,870 | AX-148258897 |
| MYH7 | rs7145543   | chr14:23,881,947-23,904,870 | AX-148678562 |
| MYH7 | rs7145023   | chr14:23,881,947-23,904,870 | AX-148421872 |
| MYH7 | rs7145023   | chr14:23,881,947-23,904,870 | AX-156280248 |
| MYH7 | rs2331979   | chr14:23,881,947-23,904,870 | AX-39732567  |
| MYH7 | ---         | chr14:23,881,947-23,904,870 | AX-90025906  |
| MYH7 | ---         | chr14:23,881,947-23,904,870 | AX-90025907  |
| MYH7 | rs397516254 | chr14:23,881,947-23,904,870 | AX-90033043  |
| MYH7 | rs200728597 | chr14:23,881,947-23,904,870 | AX-91989501  |
| MYH7 | ---         | chr14:23,881,947-23,904,870 | AX-94379421  |
| MYH7 | rs45523233  | chr14:23,881,947-23,904,870 | AX-91996517  |
| MYH7 | ---         | chr14:23,881,947-23,904,870 | AX-94362673  |
| MYH7 | rs3729833   | chr14:23,881,947-23,904,870 | AX-39732569  |
| MYH7 | rs121913652 | chr14:23,881,947-23,904,870 | AX-90069769  |
| MYH7 | rs376668612 | chr14:23,881,947-23,904,870 | AX-92013743  |
| MYH7 | rs368706722 | chr14:23,881,947-23,904,870 | AX-91980766  |
| MYH7 | rs765021    | chr14:23,881,947-23,904,870 | AX-31312261  |
| MYH7 | rs765020    | chr14:23,881,947-23,904,870 | AX-31312263  |
| MYH7 | rs58290801  | chr14:23,881,947-23,904,870 | AX-31312265  |
| MYH7 | rs765019    | chr14:23,881,947-23,904,870 | AX-31312267  |
| MYH7 | rs3729832   | chr14:23,881,947-23,904,870 | AX-39732573  |
| MYH7 | ---         | chr14:23,881,947-23,904,870 | AX-94362676  |
| MYH7 | ---         | chr14:23,881,947-23,904,870 | AX-94379427  |
| MYH7 | ---         | chr14:23,881,947-23,904,870 | AX-91996825  |
| MYH7 | ---         | chr14:23,881,947-23,904,870 | AX-90025909  |
| MYH7 | ---         | chr14:23,881,947-23,904,870 | AX-94379428  |
| MYH7 | ---         | chr14:23,881,947-23,904,870 | AX-90025910  |
| MYH7 | rs3729831   | chr14:23,881,947-23,904,870 | AX-92002128  |
| MYH7 | ---         | chr14:23,881,947-23,904,870 | AX-90067763  |
| MYH7 | rs368848344 | chr14:23,881,947-23,904,870 | AX-92025059  |
| MYH7 | ---         | chr14:23,881,947-23,904,870 | AX-94379429  |
| MYH7 | ---         | chr14:23,881,947-23,904,870 | AX-90031615  |
| MYH7 | ---         | chr14:23,881,947-23,904,870 | AX-94379430  |
| MYH7 | ---         | chr14:23,881,947-23,904,870 | AX-90062449  |
| MYH7 | rs121913654 | chr14:23,881,947-23,904,870 | AX-90069770  |
| MYH7 | ---         | chr14:23,881,947-23,904,870 | AX-90031784  |
| MYH7 | rs201171029 | chr14:23,881,947-23,904,870 | AX-92010787  |
| MYH7 | ---         | chr14:23,881,947-23,904,870 | AX-90077185  |
| MYH7 | rs200939753 | chr14:23,881,947-23,904,870 | AX-88753563  |
| MYH7 | ---         | chr14:23,881,947-23,904,870 | AX-90054796  |
| MYH7 | rs139222507 | chr14:23,881,947-23,904,870 | AX-88796575  |
| MYH7 | rs397516241 | chr14:23,881,947-23,904,870 | AX-90054797  |
| MYH7 | rs267606909 | chr14:23,881,947-23,904,870 | AX-90054798  |
| MYH7 | ---         | chr14:23,881,947-23,904,870 | AX-94379431  |
| MYH7 | rs45582836  | chr14:23,881,947-23,904,870 | AX-91989866  |
| MYH7 | ---         | chr14:23,881,947-23,904,870 | AX-90062165  |
| MYH7 | ---         | chr14:23,881,947-23,904,870 | AX-90025914  |
| MYH7 | rs545585809 | chr14:23,881,947-23,904,870 | AX-90025915  |
| MYH7 | ---         | chr14:23,881,947-23,904,870 | AX-90029395  |
| MYH7 | ---         | chr14:23,881,947-23,904,870 | AX-94362682  |
| MYH7 | rs367543052 | chr14:23,881,947-23,904,870 | AX-90078512  |
| MYH7 | ---         | chr14:23,881,947-23,904,870 | AX-94362683  |
| MYH7 | rs193922390 | chr14:23,881,947-23,904,870 | AX-86894418  |
| MYH7 | rs121913650 | chr14:23,881,947-23,904,870 | AX-88796562  |

|      |             |                             |              |
|------|-------------|-----------------------------|--------------|
| MYH7 | ---         | chr14:23,881,947-23,904,870 | AX-90066045  |
| MYH7 | rs3729830   | chr14:23,881,947-23,904,870 | AX-92023968  |
| MYH7 | rs3729830   | chr14:23,881,947-23,904,870 | AX-92385436  |
| MYH7 | rs373219734 | chr14:23,881,947-23,904,870 | AX-92708497  |
| MYH7 | rs45464193  | chr14:23,881,947-23,904,870 | AX-88778788  |
| MYH7 | ---         | chr14:23,881,947-23,904,870 | AX-86652175  |
| MYH7 | ---         | chr14:23,881,947-23,904,870 | AX-94364182  |
| MYH7 | ---         | chr14:23,881,947-23,904,870 | AX-94362684  |
| MYH7 | ---         | chr14:23,881,947-23,904,870 | AX-90057814  |
| MYH7 | rs370328209 | chr14:23,881,947-23,904,870 | AX-90058980  |
| MYH7 | ---         | chr14:23,881,947-23,904,870 | AX-91993802  |
| MYH7 | ---         | chr14:23,881,947-23,904,870 | AX-90036360  |
| MYH7 | rs397516233 | chr14:23,881,947-23,904,870 | AX-90054801  |
| MYH7 | rs141122361 | chr14:23,881,947-23,904,870 | AX-86611677  |
| MYH7 | ---         | chr14:23,881,947-23,904,870 | AX-94356300  |
| MYH7 | ---         | chr14:23,881,947-23,904,870 | AX-94356301  |
| MYH7 | rs373514686 | chr14:23,881,947-23,904,870 | AX-91976277  |
| MYH7 | ---         | chr14:23,881,947-23,904,870 | AX-90036400  |
| MYH7 | rs45476496  | chr14:23,881,947-23,904,870 | AX-91984829  |
| MYH7 | ---         | chr14:23,881,947-23,904,870 | AX-90033363  |
| MYH7 | rs7140196   | chr14:23,881,947-23,904,870 | AX-88778790  |
| MYH7 | ---         | chr14:23,881,947-23,904,870 | AX-94373052  |
| MYH7 | rs200601164 | chr14:23,881,947-23,904,870 | AX-91984042  |
| MYH7 | ---         | chr14:23,881,947-23,904,870 | AX-94363355  |
| MYH7 | ---         | chr14:23,881,947-23,904,870 | AX-90025918  |
| MYH7 | ---         | chr14:23,881,947-23,904,870 | AX-94356303  |
| MYH7 | rs7140721   | chr14:23,881,947-23,904,870 | AX-156271314 |
| MYH7 | rs7140721   | chr14:23,881,947-23,904,870 | AX-156289838 |
| MYH7 | rs76614781  | chr14:23,881,947-23,904,870 | AX-31312287  |
| MYH7 | rs3729829   | chr14:23,881,947-23,904,870 | AX-11476404  |
| MYH7 | rs3729828   | chr14:23,881,947-23,904,870 | AX-156271315 |
| MYH7 | rs3729828   | chr14:23,881,947-23,904,870 | AX-156289839 |
| MYH7 | rs3729827   | chr14:23,881,947-23,904,870 | AX-39732585  |
| MYH7 | ---         | chr14:23,881,947-23,904,870 | AX-94356304  |
| MYH7 | ---         | chr14:23,881,947-23,904,870 | AX-90037308  |
| MYH7 | rs2754155   | chr14:23,881,947-23,904,870 | AX-91985388  |
| MYH7 | rs397516222 | chr14:23,881,947-23,904,870 | AX-90025919  |
| MYH7 | rs397516220 | chr14:23,881,947-23,904,870 | AX-90077347  |
| MYH7 | ---         | chr14:23,881,947-23,904,870 | AX-94373055  |
| MYH7 | rs45503601  | chr14:23,881,947-23,904,870 | AX-92014335  |
| MYH7 | rs3729825   | chr14:23,881,947-23,904,870 | AX-39732587  |
| MYH7 | ---         | chr14:23,881,947-23,904,870 | AX-90062719  |
| MYH7 | ---         | chr14:23,881,947-23,904,870 | AX-90055831  |
| MYH7 | rs45544633  | chr14:23,881,947-23,904,870 | AX-88778791  |
| MYH7 | rs397516218 | chr14:23,881,947-23,904,870 | AX-90054805  |
| MYH7 | rs3729823   | chr14:23,881,947-23,904,870 | AX-39732589  |
| MYH7 | ---         | chr14:23,881,947-23,904,870 | AX-90054806  |
| MYH7 | ---         | chr14:23,881,947-23,904,870 | AX-94373056  |
| MYH7 | rs139646545 | chr14:23,881,947-23,904,870 | AX-83357911  |
| MYH7 | ---         | chr14:23,881,947-23,904,870 | AX-94373057  |
| MYH7 | rs578166720 | chr14:23,881,947-23,904,870 | AX-91993119  |
| MYH7 | rs397516214 | chr14:23,881,947-23,904,870 | AX-91980477  |
| MYH7 | ---         | chr14:23,881,947-23,904,870 | AX-90035198  |
| MYH7 | ---         | chr14:23,881,947-23,904,870 | AX-90054808  |
| MYH7 | ---         | chr14:23,881,947-23,904,870 | AX-94356308  |

|      |             |                             |             |
|------|-------------|-----------------------------|-------------|
| MYH7 | rs368078397 | chr14:23,881,947-23,904,870 | AX-92016277 |
| MYH7 | rs3729822   | chr14:23,881,947-23,904,870 | AX-92013029 |
| MYH7 | rs397516211 | chr14:23,881,947-23,904,870 | AX-90058918 |
| MYH7 | ---         | chr14:23,881,947-23,904,870 | AX-90064591 |
| MYH7 | rs397516208 | chr14:23,881,947-23,904,870 | AX-90025924 |
| MYH7 | rs397516207 | chr14:23,881,947-23,904,870 | AX-90030768 |
| MYH7 | rs145213771 | chr14:23,881,947-23,904,870 | AX-86580629 |
| MYH7 | ---         | chr14:23,881,947-23,904,870 | AX-94356309 |
| MYH7 | rs201895208 | chr14:23,881,947-23,904,870 | AX-88796622 |
| MYH7 | ---         | chr14:23,881,947-23,904,870 | AX-90025925 |
| MYH7 | rs397516202 | chr14:23,881,947-23,904,870 | AX-86894494 |
| MYH7 | ---         | chr14:23,881,947-23,904,870 | AX-94356310 |
| MYH7 | ---         | chr14:23,881,947-23,904,870 | AX-94373061 |
| MYH7 | ---         | chr14:23,881,947-23,904,870 | AX-94373062 |
| MYH7 | rs397516201 | chr14:23,881,947-23,904,870 | AX-90025926 |
| MYH7 | ---         | chr14:23,881,947-23,904,870 | AX-92008545 |
| MYH7 | ---         | chr14:23,881,947-23,904,870 | AX-94373063 |
| MYH7 | rs45451303  | chr14:23,881,947-23,904,870 | AX-84691226 |
| MYH7 | ---         | chr14:23,881,947-23,904,870 | AX-90025927 |
| MYH7 | rs370403289 | chr14:23,881,947-23,904,870 | AX-86693884 |
| MYH7 | ---         | chr14:23,881,947-23,904,870 | AX-90078284 |
| MYH7 | ---         | chr14:23,881,947-23,904,870 | AX-94356314 |
| MYH7 | ---         | chr14:23,881,947-23,904,870 | AX-90057071 |
| MYH7 | ---         | chr14:23,881,947-23,904,870 | AX-94373065 |
| MYH7 | ---         | chr14:23,881,947-23,904,870 | AX-92012367 |
| MYH7 | rs397516198 | chr14:23,881,947-23,904,870 | AX-90035422 |
| MYH7 | ---         | chr14:23,881,947-23,904,870 | AX-92544772 |
| MYH7 | rs7159367   | chr14:23,881,947-23,904,870 | AX-84715599 |
| MYH7 | rs7159367   | chr14:23,881,947-23,904,870 | AX-84715600 |
| MYH7 | rs10136106  | chr14:23,881,947-23,904,870 | AX-84683129 |
| MYH7 | rs12894524  | chr14:23,881,947-23,904,870 | AX-84717413 |
| MYH7 | rs12894524  | chr14:23,881,947-23,904,870 | AX-84717414 |
| MYH7 | rs28631169  | chr14:23,881,947-23,904,870 | AX-31312311 |
| MYH7 | rs34598192  | chr14:23,881,947-23,904,870 | AX-84690381 |
| MYH7 | rs34598192  | chr14:23,881,947-23,904,870 | AX-84727267 |
| MYH7 | rs144420313 | chr14:23,881,947-23,904,870 | AX-92024004 |
| MYH7 | ---         | chr14:23,881,947-23,904,870 | AX-90025928 |
| MYH7 | rs45501694  | chr14:23,881,947-23,904,870 | AX-31312315 |
| MYH7 | rs150292548 | chr14:23,881,947-23,904,870 | AX-91977945 |
| MYH7 | rs397516196 | chr14:23,881,947-23,904,870 | AX-90064407 |
| MYH7 | rs371335299 | chr14:23,881,947-23,904,870 | AX-91986743 |
| MYH7 | rs2277475   | chr14:23,881,947-23,904,870 | AX-39732599 |
| MYH7 | ---         | chr14:23,881,947-23,904,870 | AX-86604297 |
| MYH7 | ---         | chr14:23,881,947-23,904,870 | AX-94373068 |
| MYH7 | ---         | chr14:23,881,947-23,904,870 | AX-94373069 |
| MYH7 | ---         | chr14:23,881,947-23,904,870 | AX-90054814 |
| MYH7 | rs377745688 | chr14:23,881,947-23,904,870 | AX-92020956 |
| MYH7 | ---         | chr14:23,881,947-23,904,870 | AX-94360278 |
| MYH7 | rs370750044 | chr14:23,881,947-23,904,870 | AX-92021926 |
| MYH7 | ---         | chr14:23,881,947-23,904,870 | AX-90027952 |
| MYH7 | rs397516190 | chr14:23,881,947-23,904,870 | AX-90051860 |
| MYH7 | ---         | chr14:23,881,947-23,904,870 | AX-94362685 |
| MYH7 | ---         | chr14:23,881,947-23,904,870 | AX-90025930 |
| MYH7 | rs397516182 | chr14:23,881,947-23,904,870 | AX-92000066 |
| MYH7 | ---         | chr14:23,881,947-23,904,870 | AX-94362686 |

|      |             |                             |              |
|------|-------------|-----------------------------|--------------|
| MYH7 | ---         | chr14:23,881,947-23,904,870 | AX-90025931  |
| MYH7 | ---         | chr14:23,881,947-23,904,870 | AX-94362687  |
| MYH7 | rs397516187 | chr14:23,881,947-23,904,870 | AX-90035849  |
| MYH7 | ---         | chr14:23,881,947-23,904,870 | AX-90025932  |
| MYH7 | ---         | chr14:23,881,947-23,904,870 | AX-94379438  |
| MYH7 | ---         | chr14:23,881,947-23,904,870 | AX-94362689  |
| MYH7 | ---         | chr14:23,881,947-23,904,870 | AX-94379440  |
| MYH7 | ---         | chr14:23,881,947-23,904,870 | AX-94362691  |
| MYH7 | rs397516186 | chr14:23,881,947-23,904,870 | AX-92000700  |
| MYH7 | ---         | chr14:23,881,947-23,904,870 | AX-94379442  |
| MYH7 | ---         | chr14:23,881,947-23,904,870 | AX-90054818  |
| MYH7 | ---         | chr14:23,881,947-23,904,870 | AX-90054819  |
| MYH7 | ---         | chr14:23,881,947-23,904,870 | AX-94362693  |
| MYH7 | rs564923630 | chr14:23,881,947-23,904,870 | AX-83360089  |
| MYH7 | ---         | chr14:23,881,947-23,904,870 | AX-94362694  |
| MYH7 | ---         | chr14:23,881,947-23,904,870 | AX-90078119  |
| MYH7 | rs367546859 | chr14:23,881,947-23,904,870 | AX-90033653  |
| MYH7 | ---         | chr14:23,881,947-23,904,870 | AX-94379445  |
| MYH7 | rs12147533  | chr14:23,881,947-23,904,870 | AX-39732601  |
| MYH7 | rs743567    | chr14:23,881,947-23,904,870 | AX-12725262  |
| MYH7 | rs17092021  | chr14:23,881,947-23,904,870 | AX-39732603  |
| MYH7 | ---         | chr14:23,881,947-23,904,870 | AX-94362696  |
| MYH7 | ---         | chr14:23,881,947-23,904,870 | AX-94380932  |
| MYH7 | ---         | chr14:23,881,947-23,904,870 | AX-90025935  |
| MYH7 | ---         | chr14:23,881,947-23,904,870 | AX-94379447  |
| MYH7 | ---         | chr14:23,881,947-23,904,870 | AX-90054821  |
| MYH7 | rs397516179 | chr14:23,881,947-23,904,870 | AX-90025937  |
| MYH7 | ---         | chr14:23,881,947-23,904,870 | AX-86556573  |
| MYH7 | rs138294643 | chr14:23,881,947-23,904,870 | AX-91978035  |
| MYH7 | ---         | chr14:23,881,947-23,904,870 | AX-90032508  |
| MYH7 | ---         | chr14:23,881,947-23,904,870 | AX-86632466  |
| MYH7 | rs45611033  | chr14:23,881,947-23,904,870 | AX-84775859  |
| MYH7 | ---         | chr14:23,881,947-23,904,870 | AX-90025938  |
| MYH7 | rs551897533 | chr14:23,881,947-23,904,870 | AX-90054824  |
| MYH7 | rs200743586 | chr14:23,881,947-23,904,870 | AX-156285851 |
| MYH7 | rs200743586 | chr14:23,881,947-23,904,870 | AX-84738745  |
| MYH7 | rs8019322   | chr14:23,881,947-23,904,870 | AX-156271316 |
| MYH7 | rs8019322   | chr14:23,881,947-23,904,870 | AX-156289840 |
| MYH7 | ---         | chr14:23,881,947-23,904,870 | AX-90058737  |
| MYH7 | ---         | chr14:23,881,947-23,904,870 | AX-90054825  |
| MYH7 | ---         | chr14:23,881,947-23,904,870 | AX-94379448  |
| MYH7 | rs145379951 | chr14:23,881,947-23,904,870 | AX-92007819  |
| MYH7 | rs71413987  | chr14:23,881,947-23,904,870 | AX-88796203  |
| MYH7 | rs7157716   | chr14:23,881,947-23,904,870 | AX-92409255  |
| MYH7 | rs7157716   | chr14:23,881,947-23,904,870 | AX-92620278  |
| MYH7 | rs145532615 | chr14:23,881,947-23,904,870 | AX-82939071  |
| MYH7 | rs7157087   | chr14:23,881,947-23,904,870 | AX-12622736  |
| MYH7 | rs7155989   | chr14:23,881,947-23,904,870 | AX-39732607  |
| MYH7 | ---         | chr14:23,881,947-23,904,870 | AX-94379449  |
| MYH7 | ---         | chr14:23,881,947-23,904,870 | AX-94362700  |
| MYH7 | ---         | chr14:23,881,947-23,904,870 | AX-90025941  |
| MYH7 | ---         | chr14:23,881,947-23,904,870 | AX-83160331  |
| MYH7 | ---         | chr14:23,881,947-23,904,870 | AX-94379452  |
| MYH7 | ---         | chr14:23,881,947-23,904,870 | AX-90025943  |
| MYH7 | ---         | chr14:23,881,947-23,904,870 | AX-90025944  |



|      |             |                             |              |
|------|-------------|-----------------------------|--------------|
| MYH7 | rs121913629 | chr14:23,881,947-23,904,870 | AX-88796548  |
| MYH7 | rs121913639 | chr14:23,881,947-23,904,870 | AX-88753510  |
| MYH7 | ---         | chr14:23,881,947-23,904,870 | AX-90054830  |
| MYH7 | rs397516172 | chr14:23,881,947-23,904,870 | AX-90074234  |
| MYH7 | ---         | chr14:23,881,947-23,904,870 | AX-90025946  |
| MYH7 | rs397516171 | chr14:23,881,947-23,904,870 | AX-86894447  |
| MYH7 | ---         | chr14:23,881,947-23,904,870 | AX-94362703  |
| MYH7 | ---         | chr14:23,881,947-23,904,870 | AX-90044438  |
| MYH7 | ---         | chr14:23,881,947-23,904,870 | AX-90054833  |
| MYH7 | rs397516170 | chr14:23,881,947-23,904,870 | AX-90054834  |
| MYH7 | rs575013686 | chr14:23,881,947-23,904,870 | AX-94362704  |
| MYH7 | rs121913628 | chr14:23,881,947-23,904,870 | AX-88753502  |
| MYH7 | ---         | chr14:23,881,947-23,904,870 | AX-90054835  |
| MYH7 | ---         | chr14:23,881,947-23,904,870 | AX-94362705  |
| MYH7 | ---         | chr14:23,881,947-23,904,870 | AX-90034651  |
| MYH7 | rs397516168 | chr14:23,881,947-23,904,870 | AX-92014681  |
| MYH7 | rs121913631 | chr14:23,881,947-23,904,870 | AX-86894467  |
| MYH7 | rs267606908 | chr14:23,881,947-23,904,870 | AX-86894496  |
| MYH7 | ---         | chr14:23,881,947-23,904,870 | AX-90054837  |
| MYH7 | rs397516165 | chr14:23,881,947-23,904,870 | AX-90028965  |
| MYH7 | ---         | chr14:23,881,947-23,904,870 | AX-90025953  |
| MYH7 | ---         | chr14:23,881,947-23,904,870 | AX-90054839  |
| MYH7 | ---         | chr14:23,881,947-23,904,870 | AX-90054840  |
| MYH7 | ---         | chr14:23,881,947-23,904,870 | AX-90054841  |
| MYH7 | ---         | chr14:23,881,947-23,904,870 | AX-90025957  |
| MYH7 | rs397516161 | chr14:23,881,947-23,904,870 | AX-90025958  |
| MYH7 | rs45457293  | chr14:23,881,947-23,904,870 | AX-31312347  |
| MYH7 | rs10150821  | chr14:23,881,947-23,904,870 | AX-148362304 |
| MYH7 | rs10150821  | chr14:23,881,947-23,904,870 | AX-156271317 |
| MYH7 | rs368653983 | chr14:23,881,947-23,904,870 | AX-91990758  |
| MYH7 | ---         | chr14:23,881,947-23,904,870 | AX-90031370  |
| MYH7 | ---         | chr14:23,881,947-23,904,870 | AX-91994164  |
| MYH7 | ---         | chr14:23,881,947-23,904,870 | AX-90025959  |
| MYH7 | ---         | chr14:23,881,947-23,904,870 | AX-90050956  |
| MYH7 | ---         | chr14:23,881,947-23,904,870 | AX-90054845  |
| MYH7 | ---         | chr14:23,881,947-23,904,870 | AX-94357216  |
| MYH7 | ---         | chr14:23,881,947-23,904,870 | AX-90054847  |
| MYH7 | rs397516159 | chr14:23,881,947-23,904,870 | AX-92005596  |
| MYH7 | rs36211715  | chr14:23,881,947-23,904,870 | AX-86894468  |
| MYH7 | ---         | chr14:23,881,947-23,904,870 | AX-94357886  |
| MYH7 | rs138049878 | chr14:23,881,947-23,904,870 | AX-88753528  |
| MYH7 | rs202141173 | chr14:23,881,947-23,904,870 | AX-88746622  |
| MYH7 | ---         | chr14:23,881,947-23,904,870 | AX-90028321  |
| MYH7 | ---         | chr14:23,881,947-23,904,870 | AX-90054849  |
| MYH7 | rs558673680 | chr14:23,881,947-23,904,870 | AX-94357217  |
| MYH7 | ---         | chr14:23,881,947-23,904,870 | AX-90032425  |
| MYH7 | ---         | chr14:23,881,947-23,904,870 | AX-90033141  |
| MYH7 | ---         | chr14:23,881,947-23,904,870 | AX-83469943  |
| MYH7 | ---         | chr14:23,881,947-23,904,870 | AX-90054851  |
| MYH7 | ---         | chr14:23,881,947-23,904,870 | AX-94357757  |
| MYH7 | ---         | chr14:23,881,947-23,904,870 | AX-94374507  |
| MYH7 | rs397516157 | chr14:23,881,947-23,904,870 | AX-90054852  |
| MYH7 | ---         | chr14:23,881,947-23,904,870 | AX-90054853  |
| MYH7 | ---         | chr14:23,881,947-23,904,870 | AX-90054854  |
| MYH7 | rs397516156 | chr14:23,881,947-23,904,870 | AX-90059293  |

|      |             |                             |              |
|------|-------------|-----------------------------|--------------|
| MYH7 | ---         | chr14:23,881,947-23,904,870 | AX-90025971  |
| MYH7 | ---         | chr14:23,881,947-23,904,870 | AX-90058600  |
| MYH7 | ---         | chr14:23,881,947-23,904,870 | AX-90055972  |
| MYH7 | rs397516153 | chr14:23,881,947-23,904,870 | AX-90025972  |
| MYH7 | ---         | chr14:23,881,947-23,904,870 | AX-94373968  |
| MYH7 | ---         | chr14:23,881,947-23,904,870 | AX-90025974  |
| MYH7 | ---         | chr14:23,881,947-23,904,870 | AX-92022818  |
| MYH7 | ---         | chr14:23,881,947-23,904,870 | AX-90054863  |
| MYH7 | ---         | chr14:23,881,947-23,904,870 | AX-90054864  |
| MYH7 | rs11848507  | chr14:23,881,947-23,904,870 | AX-91987735  |
| MYH7 | ---         | chr14:23,881,947-23,904,870 | AX-90025980  |
| MYH7 | ---         | chr14:23,881,947-23,904,870 | AX-90063359  |
| MYH7 | rs376754645 | chr14:23,881,947-23,904,870 | AX-86711923  |
| MYH7 | rs145677314 | chr14:23,881,947-23,904,870 | AX-86554725  |
| MYH7 | ---         | chr14:23,881,947-23,904,870 | AX-94373969  |
| MYH7 | rs139882431 | chr14:23,881,947-23,904,870 | AX-91997847  |
| MYH7 | ---         | chr14:23,881,947-23,904,870 | AX-86579693  |
| MYH7 | ---         | chr14:23,881,947-23,904,870 | AX-90025982  |
| MYH7 | ---         | chr14:23,881,947-23,904,870 | AX-90054868  |
| MYH7 | ---         | chr14:23,881,947-23,904,870 | AX-90025984  |
| MYH7 | ---         | chr14:23,881,947-23,904,870 | AX-90025985  |
| MYH7 | ---         | chr14:23,881,947-23,904,870 | AX-90034671  |
| MYH7 | rs121913634 | chr14:23,881,947-23,904,870 | AX-88796551  |
| MYH7 | ---         | chr14:23,881,947-23,904,870 | AX-90054872  |
| MYH7 | ---         | chr14:23,881,947-23,904,870 | AX-86894497  |
| MYH7 | ---         | chr14:23,881,947-23,904,870 | AX-91994588  |
| MYH7 | rs121913643 | chr14:23,881,947-23,904,870 | AX-88753514  |
| MYH7 | ---         | chr14:23,881,947-23,904,870 | AX-90025988  |
| MYH7 | ---         | chr14:23,881,947-23,904,870 | AX-90054874  |
| MYH7 | rs2854797   | chr14:23,881,947-23,904,870 | AX-94363663  |
| MYH7 | ---         | chr14:23,881,947-23,904,870 | AX-94357220  |
| MYH7 | ---         | chr14:23,881,947-23,904,870 | AX-94379456  |
| MYH7 | ---         | chr14:23,881,947-23,904,870 | AX-90025990  |
| MYH7 | ---         | chr14:23,881,947-23,904,870 | AX-90054876  |
| MYH7 | ---         | chr14:23,881,947-23,904,870 | AX-90054877  |
| MYH7 | ---         | chr14:23,881,947-23,904,870 | AX-94357768  |
| MYH7 | ---         | chr14:23,881,947-23,904,870 | AX-94374518  |
| MYH7 | ---         | chr14:23,881,947-23,904,870 | AX-94379457  |
| MYH7 | ---         | chr14:23,881,947-23,904,870 | AX-90054879  |
| MYH7 | ---         | chr14:23,881,947-23,904,870 | AX-90054880  |
| MYH7 | ---         | chr14:23,881,947-23,904,870 | AX-90054881  |
| MYH7 | ---         | chr14:23,881,947-23,904,870 | AX-94377160  |
| MYH7 | ---         | chr14:23,881,947-23,904,870 | AX-90025997  |
| MYH7 | ---         | chr14:23,881,947-23,904,870 | AX-90025998  |
| MYH7 | ---         | chr14:23,881,947-23,904,870 | AX-90054884  |
| MYH7 | ---         | chr14:23,881,947-23,904,870 | AX-90027801  |
| MYH7 | ---         | chr14:23,881,947-23,904,870 | AX-90026000  |
| MYH7 | ---         | chr14:23,881,947-23,904,870 | AX-90054886  |
| MYH7 | ---         | chr14:23,881,947-23,904,870 | AX-91981128  |
| MYH7 | ---         | chr14:23,881,947-23,904,870 | AX-94362708  |
| MYH7 | rs397516135 | chr14:23,881,947-23,904,870 | AX-90026002  |
| MYH7 | ---         | chr14:23,881,947-23,904,870 | AX-86894470  |
| MYH7 | rs3729818   | chr14:23,881,947-23,904,870 | AX-156271318 |
| MYH7 | rs3729818   | chr14:23,881,947-23,904,870 | AX-156289841 |
| MYH7 | ---         | chr14:23,881,947-23,904,870 | AX-94362710  |

|      |             |                             |             |
|------|-------------|-----------------------------|-------------|
| MYH7 | rs121913641 | chr14:23,881,947-23,904,870 | AX-86894471 |
| MYH7 | rs121913637 | chr14:23,881,947-23,904,870 | AX-86894472 |
| MYH7 | rs121913638 | chr14:23,881,947-23,904,870 | AX-86894473 |
| MYH7 | ---         | chr14:23,881,947-23,904,870 | AX-90026005 |
| MYH7 | ---         | chr14:23,881,947-23,904,870 | AX-90026006 |
| MYH7 | rs3181426   | chr14:23,881,947-23,904,870 | AX-91991442 |
| MYH7 | ---         | chr14:23,881,947-23,904,870 | AX-90029090 |
| MYH7 | ---         | chr14:23,881,947-23,904,870 | AX-94362711 |
| MYH7 | ---         | chr14:23,881,947-23,904,870 | AX-90026008 |
| MYH7 | rs28475411  | chr14:23,881,947-23,904,870 | AX-31312369 |
| MYH7 | ---         | chr14:23,881,947-23,904,870 | AX-94371743 |
| MYH7 | ---         | chr14:23,881,947-23,904,870 | AX-94360205 |
| MYH7 | ---         | chr14:23,881,947-23,904,870 | AX-90026011 |
| MYH7 | rs371898076 | chr14:23,881,947-23,904,870 | AX-86661074 |
| MYH7 | ---         | chr14:23,881,947-23,904,870 | AX-94360374 |
| MYH7 | ---         | chr14:23,881,947-23,904,870 | AX-94377124 |
| MYH7 | rs146474860 | chr14:23,881,947-23,904,870 | AX-91981264 |
| MYH7 | ---         | chr14:23,881,947-23,904,870 | AX-90056510 |
| MYH7 | ---         | chr14:23,881,947-23,904,870 | AX-90026013 |
| MYH7 | ---         | chr14:23,881,947-23,904,870 | AX-94360206 |
| MYH7 | ---         | chr14:23,881,947-23,904,870 | AX-90054899 |
| MYH7 | ---         | chr14:23,881,947-23,904,870 | AX-90054900 |
| MYH7 | rs121913646 | chr14:23,881,947-23,904,870 | AX-88796561 |
| MYH7 | ---         | chr14:23,881,947-23,904,870 | AX-90054901 |
| MYH7 | ---         | chr14:23,881,947-23,904,870 | AX-90063022 |
| MYH7 | ---         | chr14:23,881,947-23,904,870 | AX-90026017 |
| MYH7 | rs541143322 | chr14:23,881,947-23,904,870 | AX-94360207 |
| MYH7 | ---         | chr14:23,881,947-23,904,870 | AX-90026018 |
| MYH7 | ---         | chr14:23,881,947-23,904,870 | AX-90026019 |
| MYH7 | ---         | chr14:23,881,947-23,904,870 | AX-92011321 |
| MYH7 | ---         | chr14:23,881,947-23,904,870 | AX-94360208 |
| MYH7 | ---         | chr14:23,881,947-23,904,870 | AX-90058458 |
| MYH7 | rs121913627 | chr14:23,881,947-23,904,870 | AX-86894426 |
| MYH7 | ---         | chr14:23,881,947-23,904,870 | AX-90054905 |
| MYH7 | ---         | chr14:23,881,947-23,904,870 | AX-94360209 |
| MYH7 | ---         | chr14:23,881,947-23,904,870 | AX-90035330 |
| MYH7 | ---         | chr14:23,881,947-23,904,870 | AX-92016045 |
| MYH7 | ---         | chr14:23,881,947-23,904,870 | AX-90057200 |
| MYH7 | rs3729816   | chr14:23,881,947-23,904,870 | AX-39732613 |
| MYH7 | ---         | chr14:23,881,947-23,904,870 | AX-90026022 |
| MYH7 | ---         | chr14:23,881,947-23,904,870 | AX-92002487 |
| MYH7 | rs397516121 | chr14:23,881,947-23,904,870 | AX-91985024 |
| MYH7 | rs201860580 | chr14:23,881,947-23,904,870 | AX-91980271 |
| MYH7 | ---         | chr14:23,881,947-23,904,870 | AX-90054908 |
| MYH7 | ---         | chr14:23,881,947-23,904,870 | AX-90026024 |
| MYH7 | ---         | chr14:23,881,947-23,904,870 | AX-94376960 |
| MYH7 | ---         | chr14:23,881,947-23,904,870 | AX-90035361 |
| MYH7 | ---         | chr14:23,881,947-23,904,870 | AX-86575331 |
| MYH7 | rs149386750 | chr14:23,881,947-23,904,870 | AX-91977504 |
| MYH7 | ---         | chr14:23,881,947-23,904,870 | AX-90026025 |
| MYH7 | rs564101364 | chr14:23,881,947-23,904,870 | AX-90026026 |
| MYH7 | ---         | chr14:23,881,947-23,904,870 | AX-94376961 |
| MYH7 | ---         | chr14:23,881,947-23,904,870 | AX-90027736 |
| MYH7 | ---         | chr14:23,881,947-23,904,870 | AX-90054912 |
| MYH7 | rs2069543   | chr14:23,881,947-23,904,870 | AX-92483022 |

|      |             |                             |              |
|------|-------------|-----------------------------|--------------|
| MYH7 | rs2069543   | chr14:23,881,947-23,904,870 | AX-92694045  |
| MYH7 | rs121913642 | chr14:23,881,947-23,904,870 | AX-88796558  |
| MYH7 | ---         | chr14:23,881,947-23,904,870 | AX-90054913  |
| MYH7 | ---         | chr14:23,881,947-23,904,870 | AX-90064698  |
| MYH7 | rs182949516 | chr14:23,881,947-23,904,870 | AX-92020327  |
| MYH7 | rs1951154   | chr14:23,881,947-23,904,870 | AX-39732615  |
| MYH7 | rs2754163   | chr14:23,881,947-23,904,870 | AX-39732617  |
| MYH7 | ---         | chr14:23,881,947-23,904,870 | AX-90065764  |
| MYH7 | ---         | chr14:23,881,947-23,904,870 | AX-94376962  |
| MYH7 | ---         | chr14:23,881,947-23,904,870 | AX-90054914  |
| MYH7 | ---         | chr14:23,881,947-23,904,870 | AX-90064888  |
| MYH7 | ---         | chr14:23,881,947-23,904,870 | AX-90026030  |
| MYH7 | rs121913636 | chr14:23,881,947-23,904,870 | AX-88796552  |
| MYH7 | rs397516110 | chr14:23,881,947-23,904,870 | AX-90026031  |
| MYH7 | ---         | chr14:23,881,947-23,904,870 | AX-90026032  |
| MYH7 | rs3729813   | chr14:23,881,947-23,904,870 | AX-91993639  |
| MYH7 | ---         | chr14:23,881,947-23,904,870 | AX-90026033  |
| MYH7 | ---         | chr14:23,881,947-23,904,870 | AX-91984495  |
| MYH7 | ---         | chr14:23,881,947-23,904,870 | AX-90026034  |
| MYH7 | rs3218715   | chr14:23,881,947-23,904,870 | AX-88778797  |
| MYH7 | rs267606911 | chr14:23,881,947-23,904,870 | AX-90054920  |
| MYH7 | ---         | chr14:23,881,947-23,904,870 | AX-94360213  |
| MYH7 | ---         | chr14:23,881,947-23,904,870 | AX-94374678  |
| MYH7 | rs121913651 | chr14:23,881,947-23,904,870 | AX-88753518  |
| MYH7 | ---         | chr14:23,881,947-23,904,870 | AX-90026037  |
| MYH7 | ---         | chr14:23,881,947-23,904,870 | AX-94360214  |
| MYH7 | ---         | chr14:23,881,947-23,904,870 | AX-90028810  |
| MYH7 | ---         | chr14:23,881,947-23,904,870 | AX-90056313  |
| MYH7 | rs3729814   | chr14:23,881,947-23,904,870 | AX-113725984 |
| MYH7 | rs3729814   | chr14:23,881,947-23,904,870 | AX-156266484 |
| MYH7 | ---         | chr14:23,881,947-23,904,870 | AX-94376965  |
| MYH7 | rs397516106 | chr14:23,881,947-23,904,870 | AX-90060225  |
| MYH7 | ---         | chr14:23,881,947-23,904,870 | AX-90064272  |
| MYH7 | ---         | chr14:23,881,947-23,904,870 | AX-90055942  |
| MYH7 | rs4981473   | chr14:23,881,947-23,904,870 | AX-92015496  |
| MYH7 | rs45508293  | chr14:23,881,947-23,904,870 | AX-92010687  |
| MYH7 | rs397516105 | chr14:23,881,947-23,904,870 | AX-94360279  |
| MYH7 | rs397516103 | chr14:23,881,947-23,904,870 | AX-90035303  |
| MYH7 | rs397516101 | chr14:23,881,947-23,904,870 | AX-90026038  |
| MYH7 | ---         | chr14:23,881,947-23,904,870 | AX-94357309  |
| MYH7 | ---         | chr14:23,881,947-23,904,870 | AX-94374059  |
| MYH7 | ---         | chr14:23,881,947-23,904,870 | AX-90054925  |
| MYH7 | ---         | chr14:23,881,947-23,904,870 | AX-90054926  |
| MYH7 | ---         | chr14:23,881,947-23,904,870 | AX-94362712  |
| MYH7 | ---         | chr14:23,881,947-23,904,870 | AX-88735753  |
| MYH7 | ---         | chr14:23,881,947-23,904,870 | AX-90026043  |
| MYH7 | rs148808089 | chr14:23,881,947-23,904,870 | AX-86560384  |
| MYH7 | rs121913653 | chr14:23,881,947-23,904,870 | AX-86663839  |
| MYH7 | rs397516098 | chr14:23,881,947-23,904,870 | AX-90054929  |
| MYH7 | ---         | chr14:23,881,947-23,904,870 | AX-90054930  |
| MYH7 | ---         | chr14:23,881,947-23,904,870 | AX-90026046  |
| MYH7 | ---         | chr14:23,881,947-23,904,870 | AX-90026047  |
| MYH7 | ---         | chr14:23,881,947-23,904,870 | AX-94379463  |
| MYH7 | rs397516097 | chr14:23,881,947-23,904,870 | AX-90054933  |
| MYH7 | ---         | chr14:23,881,947-23,904,870 | AX-94362714  |

|      |             |                             |             |
|------|-------------|-----------------------------|-------------|
| MYH7 | rs141519877 | chr14:23,881,947-23,904,870 | AX-92018287 |
| MYH7 | ---         | chr14:23,881,947-23,904,870 | AX-90054934 |
| MYH7 | ---         | chr14:23,881,947-23,904,870 | AX-90026050 |
| MYH7 | rs150885220 | chr14:23,881,947-23,904,870 | AX-90083208 |
| MYH7 | rs397516095 | chr14:23,881,947-23,904,870 | AX-90026051 |
| MYH7 | ---         | chr14:23,881,947-23,904,870 | AX-90054937 |
| MYH7 | ---         | chr14:23,881,947-23,904,870 | AX-90026053 |
| MYH7 | ---         | chr14:23,881,947-23,904,870 | AX-88753500 |
| MYH7 | rs3218714   | chr14:23,881,947-23,904,870 | AX-86894429 |
| MYH7 | ---         | chr14:23,881,947-23,904,870 | AX-90026054 |
| MYH7 | rs139506719 | chr14:23,881,947-23,904,870 | AX-92015083 |
| MYH7 | ---         | chr14:23,881,947-23,904,870 | AX-94379465 |
| MYH7 | ---         | chr14:23,881,947-23,904,870 | AX-92001716 |
| MYH7 | ---         | chr14:23,881,947-23,904,870 | AX-90034050 |
| MYH7 | ---         | chr14:23,881,947-23,904,870 | AX-90026055 |
| MYH7 | ---         | chr14:23,881,947-23,904,870 | AX-90036361 |
| MYH7 | ---         | chr14:23,881,947-23,904,870 | AX-90026057 |
| MYH7 | ---         | chr14:23,881,947-23,904,870 | AX-90054943 |
| MYH7 | ---         | chr14:23,881,947-23,904,870 | AX-90026059 |
| MYH7 | ---         | chr14:23,881,947-23,904,870 | AX-90054945 |
| MYH7 | ---         | chr14:23,881,947-23,904,870 | AX-94362716 |
| MYH7 | ---         | chr14:23,881,947-23,904,870 | AX-90026061 |
| MYH7 | ---         | chr14:23,881,947-23,904,870 | AX-90062778 |
| MYH7 | rs2231126   | chr14:23,881,947-23,904,870 | AX-91985266 |
| MYH7 | rs2231126   | chr14:23,881,947-23,904,870 | AX-92010393 |
| MYH7 | ---         | chr14:23,881,947-23,904,870 | AX-94379467 |
| MYH7 | rs397516089 | chr14:23,881,947-23,904,870 | AX-90026062 |
| MYH7 | rs735711    | chr14:23,881,947-23,904,870 | AX-91976699 |
| MYH7 | rs735711    | chr14:23,881,947-23,904,870 | AX-92001826 |
| MYH7 | rs397516088 | chr14:23,881,947-23,904,870 | AX-90026063 |
| MYH7 | rs735712    | chr14:23,881,947-23,904,870 | AX-11623071 |
| MYH7 | ---         | chr14:23,881,947-23,904,870 | AX-90026064 |
| MYH7 | ---         | chr14:23,881,947-23,904,870 | AX-90060265 |
| MYH7 | rs121913640 | chr14:23,881,947-23,904,870 | AX-88753511 |
| MYH7 | ---         | chr14:23,881,947-23,904,870 | AX-94362718 |
| MYH7 | ---         | chr14:23,881,947-23,904,870 | AX-92001154 |
| MYH7 | rs202199570 | chr14:23,881,947-23,904,870 | AX-92022693 |
| MYH7 | rs3729810   | chr14:23,881,947-23,904,870 | AX-92553889 |
| MYH7 | ---         | chr14:23,881,947-23,904,870 | AX-90026065 |
| MYH7 | rs372731424 | chr14:23,881,947-23,904,870 | AX-86733324 |
| MYH7 | rs2231124   | chr14:23,881,947-23,904,870 | AX-31312405 |
| MYH7 | ---         | chr14:23,881,947-23,904,870 | AX-94362719 |
| MYH7 | ---         | chr14:23,881,947-23,904,870 | AX-90059888 |
| MYH7 | ---         | chr14:23,881,947-23,904,870 | AX-94362720 |
| MYH7 | rs376897125 | chr14:23,881,947-23,904,870 | AX-86735700 |
| MYH7 | ---         | chr14:23,881,947-23,904,870 | AX-90026066 |
| MYH7 | ---         | chr14:23,881,947-23,904,870 | AX-94362721 |
| MYH7 | ---         | chr14:23,881,947-23,904,870 | AX-94379472 |
| MYH7 | ---         | chr14:23,881,947-23,904,870 | AX-90026067 |
| MYH7 | rs45580436  | chr14:23,881,947-23,904,870 | AX-39732627 |
| MYH7 | rs397516272 | chr14:23,881,947-23,904,870 | AX-90033718 |
| MYH7 | ---         | chr14:23,881,947-23,904,870 | AX-90026068 |
| MYH7 | ---         | chr14:23,881,947-23,904,870 | AX-90026069 |
| MYH7 | ---         | chr14:23,881,947-23,904,870 | AX-92020270 |
| MYH7 | ---         | chr14:23,881,947-23,904,870 | AX-90026070 |

|      |             |                             |             |
|------|-------------|-----------------------------|-------------|
| MYH7 | rs372245426 | chr14:23,881,947-23,904,870 | AX-83540097 |
| MYH7 | ---         | chr14:23,881,947-23,904,870 | AX-94362723 |
| MYH7 | ---         | chr14:23,881,947-23,904,870 | AX-90026071 |
| MYH7 | rs397516269 | chr14:23,881,947-23,904,870 | AX-90054957 |
| MYH7 | ---         | chr14:23,881,947-23,904,870 | AX-90054958 |
| MYH7 | rs121913633 | chr14:23,881,947-23,904,870 | AX-88796550 |
| MYH7 | ---         | chr14:23,881,947-23,904,870 | AX-94362724 |
| MYH7 | ---         | chr14:23,881,947-23,904,870 | AX-90054959 |
| MYH7 | rs397516268 | chr14:23,881,947-23,904,870 | AX-91993699 |
| MYH7 | ---         | chr14:23,881,947-23,904,870 | AX-90054961 |
| MYH7 | ---         | chr14:23,881,947-23,904,870 | AX-94379475 |
| MYH7 | ---         | chr14:23,881,947-23,904,870 | AX-90026077 |
| MYH7 | ---         | chr14:23,881,947-23,904,870 | AX-90057428 |
| MYH7 | ---         | chr14:23,881,947-23,904,870 | AX-90035918 |
| MYH7 | rs2069542   | chr14:23,881,947-23,904,870 | AX-83279322 |
| MYH7 | ---         | chr14:23,881,947-23,904,870 | AX-90054963 |
| MYH7 | rs267606910 | chr14:23,881,947-23,904,870 | AX-90054964 |
| MYH7 | rs397516265 | chr14:23,881,947-23,904,870 | AX-90056339 |
| MYH7 | rs397516264 | chr14:23,881,947-23,904,870 | AX-90054965 |
| MYH7 | rs397516263 | chr14:23,881,947-23,904,870 | AX-92025001 |
| MYH7 | ---         | chr14:23,881,947-23,904,870 | AX-90026081 |
| MYH7 | ---         | chr14:23,881,947-23,904,870 | AX-90054967 |
| MYH7 | ---         | chr14:23,881,947-23,904,870 | AX-94362726 |
| MYH7 | ---         | chr14:23,881,947-23,904,870 | AX-90054968 |
| MYH7 | ---         | chr14:23,881,947-23,904,870 | AX-94362727 |
| MYH7 | rs121913645 | chr14:23,881,947-23,904,870 | AX-88753515 |
| MYH7 | ---         | chr14:23,881,947-23,904,870 | AX-90054971 |
| MYH7 | ---         | chr14:23,881,947-23,904,870 | AX-90054972 |
| MYH7 | ---         | chr14:23,881,947-23,904,870 | AX-90026088 |
| MYH7 | ---         | chr14:23,881,947-23,904,870 | AX-90026089 |
| MYH7 | ---         | chr14:23,881,947-23,904,870 | AX-90026090 |
| MYH7 | rs397516260 | chr14:23,881,947-23,904,870 | AX-90026091 |
| MYH7 | ---         | chr14:23,881,947-23,904,870 | AX-90052516 |
| MYH7 | rs397516258 | chr14:23,881,947-23,904,870 | AX-90054977 |
| MYH7 | rs2069541   | chr14:23,881,947-23,904,870 | AX-39732631 |
| MYH7 | ---         | chr14:23,881,947-23,904,870 | AX-94379478 |
| MYH7 | ---         | chr14:23,881,947-23,904,870 | AX-90054978 |
| MYH7 | ---         | chr14:23,881,947-23,904,870 | AX-90054979 |
| MYH7 | ---         | chr14:23,881,947-23,904,870 | AX-94379479 |
| MYH7 | ---         | chr14:23,881,947-23,904,870 | AX-90054980 |
| MYH7 | ---         | chr14:23,881,947-23,904,870 | AX-90026096 |
| MYH7 | ---         | chr14:23,881,947-23,904,870 | AX-90026097 |
| MYH7 | rs369490861 | chr14:23,881,947-23,904,870 | AX-94362730 |
| MYH7 | ---         | chr14:23,881,947-23,904,870 | AX-90035360 |
| MYH7 | rs201586880 | chr14:23,881,947-23,904,870 | AX-92002863 |
| MYH7 | rs7151241   | chr14:23,881,947-23,904,870 | AX-39732633 |
| MYH7 | rs73587634  | chr14:23,881,947-23,904,870 | AX-31312413 |
| MYH7 | rs28615777  | chr14:23,881,947-23,904,870 | AX-31312415 |
| MYH7 | rs114763452 | chr14:23,881,947-23,904,870 | AX-12725269 |
| MYH7 | rs2754165   | chr14:23,881,947-23,904,870 | AX-31312417 |
| MYH7 | ---         | chr14:23,881,947-23,904,870 | AX-90054984 |
| MYH7 | ---         | chr14:23,881,947-23,904,870 | AX-94379481 |
| MYH7 | ---         | chr14:23,881,947-23,904,870 | AX-94362732 |
| MYH7 | ---         | chr14:23,881,947-23,904,870 | AX-90026100 |
| MYH7 | rs45500700  | chr14:23,881,947-23,904,870 | AX-91988761 |

|      |             |                               |              |
|------|-------------|-------------------------------|--------------|
| MYH7 | ---         | chr14:23,881,947-23,904,870   | AX-86711389  |
| MYH7 | rs397516212 | chr14:23,881,947-23,904,870   | AX-90026101  |
| MYH7 | ---         | chr14:23,881,947-23,904,870   | AX-94362733  |
| MYH7 | rs397516209 | chr14:23,881,947-23,904,870   | AX-90026102  |
| MYH7 | ---         | chr14:23,881,947-23,904,870   | AX-86561595  |
| MYH7 | ---         | chr14:23,881,947-23,904,870   | AX-90065040  |
| MYH7 | ---         | chr14:23,881,947-23,904,870   | AX-92024325  |
| MYH7 | rs3729806   | chr14:23,881,947-23,904,870   | AX-91982535  |
| MYH7 | rs146744056 | chr14:23,881,947-23,904,870   | AX-91985213  |
| MYH7 | rs149439730 | chr14:23,881,947-23,904,870   | AX-83533128  |
| MYH7 | rs397516183 | chr14:23,881,947-23,904,870   | AX-90026105  |
| MYH7 | rs36211408  | chr14:23,881,947-23,904,870   | AX-91978287  |
| MYH7 | rs2754166   | chr14:23,881,947-23,904,870   | AX-92006604  |
| MYH7 | rs140245862 | chr14:23,881,947-23,904,870   | AX-92023247  |
| MYH7 | rs148560996 | chr14:23,881,947-23,904,870   | AX-92022139  |
| MYH7 | ---         | chr14:23,881,947-23,904,870   | AX-90029717  |
| MYH7 | rs3729995   | chr14:23,881,947-23,904,870   | AX-39732635  |
| MYH7 | rs2069540   | chr14:23,881,947-23,904,870   | AX-11365175  |
| MYH7 | ---         | chr14:23,881,947-23,904,870   | AX-90054991  |
| MYH7 | ---         | chr14:23,881,947-23,904,870   | AX-90054992  |
| MYH7 | rs373145667 | chr14:23,881,947-23,904,870   | AX-92020462  |
| MYH7 | ---         | chr14:23,881,947-23,904,870   | AX-94362734  |
| MYH7 | rs376160714 | chr14:23,881,947-23,904,870   | AX-86644162  |
| MYH7 | ---         | chr14:23,881,947-23,904,870   | AX-94379485  |
| MYH7 | rs186964570 | chr14:23,881,947-23,904,870   | AX-83255916  |
| MYH7 | ---         | chr14:23,881,947-23,904,870   | AX-90054993  |
| MYH7 | ---         | chr14:23,881,947-23,904,870   | AX-90081042  |
| MYH7 | ---         | chr14:23,881,947-23,904,870   | AX-90054994  |
| MYH7 | rs3729993   | chr14:23,881,947-23,904,870   | AX-91997045  |
| MYH7 | rs2239578   | chr14:23,881,947-23,904,870   | AX-39732641  |
| MYH7 | rs45497293  | chr14:23,881,947-23,904,870   | AX-11510316  |
| MYH7 | rs2239577   | chr14:23,881,947-23,904,870   | AX-114182383 |
| MYH7 | rs2239577   | chr14:23,881,947-23,904,870   | AX-156266485 |
| MYH7 | rs17092326  | chr14:23,881,947-23,904,870   | AX-12490683  |
| MYL2 | rs199474815 | chr12:111,348,624-111,358,404 | AX-88795860  |
| MYL2 | rs199474813 | chr12:111,348,624-111,358,404 | AX-90069480  |
| MYL2 | rs12231049  | chr12:111,348,624-111,358,404 | AX-11197141  |
| MYL2 | rs143139258 | chr12:111,348,624-111,358,404 | AX-83216594  |
| MYL2 | rs199474811 | chr12:111,348,624-111,358,404 | AX-88795858  |
| MYL2 | rs121913658 | chr12:111,348,624-111,358,404 | AX-88795839  |
| MYL2 | rs11065769  | chr12:111,348,624-111,358,404 | AX-39288531  |
| MYL2 | rs104894369 | chr12:111,348,624-111,358,404 | AX-86894481  |
| MYL2 | rs199474809 | chr12:111,348,624-111,358,404 | AX-90069478  |
| MYL2 | rs933296    | chr12:111,348,624-111,358,404 | AX-39288539  |
| MYL2 | ---         | chr12:111,348,624-111,358,404 | AX-83550653  |
| MYL2 | rs104894368 | chr12:111,348,624-111,358,404 | AX-88789537  |
| MYL2 | rs199474816 | chr12:111,348,624-111,358,404 | AX-88795861  |
| MYL2 | rs104894370 | chr12:111,348,624-111,358,404 | AX-88795781  |
| MYL2 | rs104894363 | chr12:111,348,624-111,358,404 | AX-83324468  |
| MYL2 | rs111525522 | chr12:111,348,624-111,358,404 | AX-16825437  |
| MYL2 | rs2233258   | chr12:111,348,624-111,358,404 | AX-39288565  |
| MYL3 | rs199474708 | chr3:46,899,357-46,904,973    | AX-90042039  |
| MYL3 | rs111617556 | chr3:46,899,357-46,904,973    | AX-90039927  |
| MYL3 | rs199474707 | chr3:46,899,357-46,904,973    | AX-86701846  |
| MYL3 | rs199474706 | chr3:46,899,357-46,904,973    | AX-88798925  |

|       |             |                              |             |
|-------|-------------|------------------------------|-------------|
| MYL3  | rs104893749 | chr3:46,899,357-46,904,973   | AX-86725846 |
| MYL3  | rs199474705 | chr3:46,899,357-46,904,973   | AX-88798924 |
| MYL3  | rs104893748 | chr3:46,899,357-46,904,973   | AX-88755648 |
| MYL3  | rs104893750 | chr3:46,899,357-46,904,973   | AX-88755649 |
| MYL3  | rs199474704 | chr3:46,899,357-46,904,973   | AX-90042036 |
| MYL3  | rs199474703 | chr3:46,899,357-46,904,973   | AX-88755878 |
| MYL3  | rs150634297 | chr3:46,899,357-46,904,973   | AX-90068613 |
| MYL3  | rs199474702 | chr3:46,899,357-46,904,973   | AX-88755877 |
| MYL3  | rs3792558   | chr3:46,899,357-46,904,973   | AX-41242637 |
| MYLK2 | rs117502839 | chr20:30,407,178-30,422,500  | AX-83341098 |
| MYLK2 | rs192056427 | chr20:30,407,178-30,422,500  | AX-83462248 |
| MYLK2 | rs121908108 | chr20:30,407,178-30,422,500  | AX-83421474 |
| MYLK2 | rs34396614  | chr20:30,407,178-30,422,500  | AX-83576264 |
| MYLK2 | rs4911532   | chr20:30,407,178-30,422,500  | AX-40526407 |
| MYLK2 | rs6119728   | chr20:30,407,178-30,422,500  | AX-32908913 |
| MYLK2 | rs17340492  | chr20:30,407,178-30,422,500  | AX-50272095 |
| MYLK2 | rs6089088   | chr20:30,407,178-30,422,500  | AX-11559009 |
| MYOZ2 | rs72673744  | chr4:120,056,939-120,108,944 | AX-34531665 |
| MYOZ2 | rs115956126 | chr4:120,056,939-120,108,944 | AX-14462122 |
| MYOZ2 | rs7655957   | chr4:120,056,939-120,108,944 | AX-14462162 |
| MYOZ2 | rs7668809   | chr4:120,056,939-120,108,944 | AX-12636181 |
| MYOZ2 | rs56034803  | chr4:120,056,939-120,108,944 | AX-34531759 |
| MYOZ2 | rs140126678 | chr4:120,056,939-120,108,944 | AX-83038636 |
| MYPN  | rs80149416  | chr10:69,865,874-69,971,773  | AX-16387925 |
| MYPN  | rs10823141  | chr10:69,865,874-69,971,773  | AX-12397494 |
| MYPN  | rs140148105 | chr10:69,865,874-69,971,773  | AX-83065473 |
| MYPN  | rs71578989  | chr10:69,865,874-69,971,773  | AX-90082250 |
| MYPN  | rs199476401 | chr10:69,865,874-69,971,773  | AX-90040308 |
| MYPN  | rs199476402 | chr10:69,865,874-69,971,773  | AX-90040309 |
| MYPN  | ---         | chr10:69,865,874-69,971,773  | AX-90069196 |
| MYPN  | rs74143022  | chr10:69,865,874-69,971,773  | AX-29690333 |
| MYPN  | rs146336815 | chr10:69,865,874-69,971,773  | AX-83414062 |
| MYPN  | rs17456902  | chr10:69,865,874-69,971,773  | AX-11324962 |
| MYPN  | rs10997938  | chr10:69,865,874-69,971,773  | AX-11137131 |
| MYPN  | rs12217951  | chr10:69,865,874-69,971,773  | AX-16387971 |
| MYPN  | rs74759173  | chr10:69,865,874-69,971,773  | AX-16387980 |
| MYPN  | rs35168680  | chr10:69,865,874-69,971,773  | AX-29690377 |
| MYPN  | rs77368905  | chr10:69,865,874-69,971,773  | AX-29690381 |
| MYPN  | rs11598201  | chr10:69,865,874-69,971,773  | AX-11161393 |
| MYPN  | rs11598219  | chr10:69,865,874-69,971,773  | AX-11161395 |
| MYPN  | rs16925142  | chr10:69,865,874-69,971,773  | AX-11290236 |
| MYPN  | rs76451279  | chr10:69,865,874-69,971,773  | AX-16387995 |
| MYPN  | rs199476404 | chr10:69,865,874-69,971,773  | AX-90040311 |
| MYPN  | rs28429181  | chr10:69,865,874-69,971,773  | AX-29690391 |
| MYPN  | rs10997944  | chr10:69,865,874-69,971,773  | AX-38864737 |
| MYPN  | rs2673798   | chr10:69,865,874-69,971,773  | AX-16388000 |
| MYPN  | rs2635994   | chr10:69,865,874-69,971,773  | AX-38864747 |
| MYPN  | rs147596628 | chr10:69,865,874-69,971,773  | AX-83395665 |
| MYPN  | rs2817760   | chr10:69,865,874-69,971,773  | AX-11412242 |
| MYPN  | rs17535935  | chr10:69,865,874-69,971,773  | AX-11328060 |
| MYPN  | rs11596653  | chr10:69,865,874-69,971,773  | AX-38864761 |
| MYPN  | rs199476406 | chr10:69,865,874-69,971,773  | AX-90040312 |
| MYPN  | rs2673801   | chr10:69,865,874-69,971,773  | AX-11404417 |
| MYPN  | rs2817759   | chr10:69,865,874-69,971,773  | AX-29690419 |
| MYPN  | rs10997948  | chr10:69,865,874-69,971,773  | AX-12403658 |



|      |             |                             |             |
|------|-------------|-----------------------------|-------------|
| MYPN | rs72795411  | chr10:69,865,874-69,971,773 | AX-29690421 |
| MYPN | rs61857532  | chr10:69,865,874-69,971,773 | AX-29690431 |
| MYPN | rs71475229  | chr10:69,865,874-69,971,773 | AX-29690445 |
| MYPN | rs2634707   | chr10:69,865,874-69,971,773 | AX-29690463 |
| MYPN | rs2087344   | chr10:69,865,874-69,971,773 | AX-12516938 |
| MYPN | rs199476408 | chr10:69,865,874-69,971,773 | AX-90040313 |
| MYPN | rs2634711   | chr10:69,865,874-69,971,773 | AX-16388049 |
| MYPN | rs199476409 | chr10:69,865,874-69,971,773 | AX-90069200 |
| MYPN | ---         | chr10:69,865,874-69,971,773 | AX-16388051 |
| MYPN | rs10997968  | chr10:69,865,874-69,971,773 | AX-38864815 |
| MYPN | rs75449519  | chr10:69,865,874-69,971,773 | AX-29690515 |
| MYPN | ---         | chr10:69,865,874-69,971,773 | AX-11137134 |
| MYPN | rs7916821   | chr10:69,865,874-69,971,773 | AX-11653589 |
| MYPN | rs3814182   | chr10:69,865,874-69,971,773 | AX-16388068 |
| MYPN | rs62620248  | chr10:69,865,874-69,971,773 | AX-29690545 |
| MYPN | rs199476410 | chr10:69,865,874-69,971,773 | AX-90069201 |
| MYPN | rs7097776   | chr10:69,865,874-69,971,773 | AX-12620565 |
| MYPN | rs199476411 | chr10:69,865,874-69,971,773 | AX-90040316 |
| MYPN | rs199476412 | chr10:69,865,874-69,971,773 | AX-86677240 |
| MYPN | rs17458319  | chr10:69,865,874-69,971,773 | AX-38864839 |
| MYPN | rs3998872   | chr10:69,865,874-69,971,773 | AX-29690577 |
| MYPN | rs116403189 | chr10:69,865,874-69,971,773 | AX-29690585 |
| MYPN | rs74769472  | chr10:69,865,874-69,971,773 | AX-16388092 |
| MYPN | rs199476413 | chr10:69,865,874-69,971,773 | AX-90040317 |
| MYPN | rs149887823 | chr10:69,865,874-69,971,773 | AX-83063544 |
| MYPN | rs151282801 | chr10:69,865,874-69,971,773 | AX-83410279 |
| MYPN | rs71584501  | chr10:69,865,874-69,971,773 | AX-88795483 |
| MYPN | rs71534278  | chr10:69,865,874-69,971,773 | AX-83391674 |
| MYPN | rs7079481   | chr10:69,865,874-69,971,773 | AX-11605365 |
| MYPN | rs138313730 | chr10:69,865,874-69,971,773 | AX-82907228 |
| MYPN | ---         | chr10:69,865,874-69,971,773 | AX-83025392 |
| MYPN | rs12358805  | chr10:69,865,874-69,971,773 | AX-16388129 |
| MYPN | rs71534280  | chr10:69,865,874-69,971,773 | AX-83304968 |
| MYPN | rs199476416 | chr10:69,865,874-69,971,773 | AX-90040318 |
| MYPN | rs6480314   | chr10:69,865,874-69,971,773 | AX-11567069 |
| MYPN | rs10998021  | chr10:69,865,874-69,971,773 | AX-16388152 |
| MYPN | rs142877365 | chr10:69,865,874-69,971,773 | AX-83190637 |
| MYPN | rs71541556  | chr10:69,865,874-69,971,773 | AX-29690683 |
| NEBL | rs2296613   | chr10:21,068,903-21,186,531 | AX-15489990 |
| NEBL | rs202184399 | chr10:21,068,903-21,186,531 | AX-83277406 |
| NEBL | rs45543632  | chr10:21,068,903-21,186,531 | AX-60549343 |
| NEBL | ---         | chr10:21,068,903-21,186,531 | AX-90034306 |
| NEBL | rs11012340  | chr10:21,068,903-21,186,531 | AX-11137867 |
| NEBL | rs77698507  | chr10:21,068,903-21,186,531 | AX-15490515 |
| NEBL | rs143584663 | chr10:21,068,903-21,186,531 | AX-83508650 |
| NEBL | rs151012132 | chr10:21,068,903-21,186,531 | AX-86697981 |
| NEBL | ---         | chr10:21,068,903-21,186,531 | AX-86612589 |
| NEBL | rs143930021 | chr10:21,068,903-21,186,531 | AX-83312129 |
| NEBL | ---         | chr10:21,068,903-21,186,531 | AX-94356606 |
| NEBL | rs146218038 | chr10:21,068,903-21,186,531 | AX-83181274 |
| NEBL | ---         | chr10:21,068,903-21,186,531 | AX-15490992 |
| NEBL | rs72785577  | chr10:21,068,903-21,186,531 | AX-29549331 |
| NEBL | rs45463591  | chr10:21,068,903-21,186,531 | AX-12574303 |
| NEBL | rs1409348   | chr10:21,068,903-21,186,531 | AX-11260843 |
| NEBL | ---         | chr10:21,068,903-21,186,531 | AX-90039930 |

|        |             |                              |             |
|--------|-------------|------------------------------|-------------|
| NEBL   | rs149647815 | chr10:21,068,903-21,186,531  | AX-86626415 |
| NEBL   | ---         | chr10:21,068,903-21,186,531  | AX-86654677 |
| NEBL   | rs370026081 | chr10:21,068,903-21,186,531  | AX-86565178 |
| NEBL   | rs41277370  | chr10:21,068,903-21,186,531  | AX-29549387 |
| NEBL   | rs4025981   | chr10:21,068,903-21,186,531  | AX-11489344 |
| NEBL   | rs703088    | chr10:21,068,903-21,186,531  | AX-11602562 |
| NEBL   | rs41277372  | chr10:21,068,903-21,186,531  | AX-11491972 |
| NEBL   | rs703089    | chr10:21,068,903-21,186,531  | AX-38783277 |
| NEBL   | rs3791198   | chr10:21,068,903-21,186,531  | AX-11480892 |
| NEBL   | rs200799762 | chr10:21,068,903-21,186,531  | AX-83483306 |
| NEBL   | rs17797263  | chr10:21,068,903-21,186,531  | AX-11340815 |
| NEBL   | rs11012365  | chr10:21,068,903-21,186,531  | AX-11137870 |
| NEBL   | ---         | chr10:21,068,903-21,186,531  | AX-94373357 |
| NEBL   | rs137973321 | chr10:21,068,903-21,186,531  | AX-83174711 |
| NEBL   | ---         | chr10:21,068,903-21,186,531  | AX-94356608 |
| NEBL   | rs71541562  | chr10:21,068,903-21,186,531  | AX-82976012 |
| NEBL   | rs114662789 | chr10:21,068,903-21,186,531  | AX-15492585 |
| NEBL   | ---         | chr10:21,068,903-21,186,531  | AX-90062123 |
| NEBL   | rs78714308  | chr10:21,068,903-21,186,531  | AX-29549505 |
| NEBL   | rs200249470 | chr10:21,068,903-21,186,531  | AX-86719579 |
| NEBL   | rs45594837  | chr10:21,068,903-21,186,531  | AX-11511345 |
| NEBL   | ---         | chr10:21,068,903-21,186,531  | AX-86705405 |
| NEBL   | rs41277374  | chr10:21,068,903-21,186,531  | AX-83274197 |
| NEBL   | rs3791203   | chr10:21,068,903-21,186,531  | AX-15493072 |
| NEBL   | ---         | chr10:21,068,903-21,186,531  | AX-83055986 |
| NEBL   | ---         | chr10:21,068,903-21,186,531  | AX-86600755 |
| NEXN   | rs1166704   | chr1:78,354,200-78,407,893   | AX-13242334 |
| NEXN   | rs78977867  | chr1:78,354,200-78,407,893   | AX-37395083 |
| NEXN   | rs35117963  | chr1:78,354,200-78,407,893   | AX-40253949 |
| NEXN   | rs387907079 | chr1:78,354,200-78,407,893   | AX-90057304 |
| NEXN   | rs57444992  | chr1:78,354,200-78,407,893   | AX-32353307 |
| NEXN   | rs201447781 | chr1:78,354,200-78,407,893   | AX-83514612 |
| NEXN   | rs1166698   | chr1:78,354,200-78,407,893   | AX-13242360 |
| NEXN   | rs146245480 | chr1:78,354,200-78,407,893   | AX-82906723 |
| NEXN   | rs1780049   | chr1:78,354,200-78,407,893   | AX-40254003 |
| NKX2-5 | ---         | chr5:172,659,107-172,662,315 | AX-90027806 |
| NKX2-5 | ---         | chr5:172,659,107-172,662,315 | AX-90079794 |
| NKX2-5 | rs368366482 | chr5:172,659,107-172,662,315 | AX-86614380 |
| NKX2-5 | ---         | chr5:172,659,107-172,662,315 | AX-90063634 |
| NKX2-5 | ---         | chr5:172,659,107-172,662,315 | AX-90055228 |
| NKX2-5 | rs397515399 | chr5:172,659,107-172,662,315 | AX-90055969 |
| NKX2-5 | ---         | chr5:172,659,107-172,662,315 | AX-90076446 |
| NKX2-5 | ---         | chr5:172,659,107-172,662,315 | AX-90055989 |
| NKX2-5 | ---         | chr5:172,659,107-172,662,315 | AX-90045022 |
| NKX2-5 | rs104893903 | chr5:172,659,107-172,662,315 | AX-88799199 |
| NKX2-5 | ---         | chr5:172,659,107-172,662,315 | AX-90055230 |
| NKX2-5 | ---         | chr5:172,659,107-172,662,315 | AX-90026346 |
| NKX2-5 | rs104893906 | chr5:172,659,107-172,662,315 | AX-88756155 |
| NKX2-5 | ---         | chr5:172,659,107-172,662,315 | AX-90055232 |
| NKX2-5 | ---         | chr5:172,659,107-172,662,315 | AX-90055233 |
| NKX2-5 | ---         | chr5:172,659,107-172,662,315 | AX-90055234 |
| NKX2-5 | ---         | chr5:172,659,107-172,662,315 | AX-90026350 |
| NKX2-5 | ---         | chr5:172,659,107-172,662,315 | AX-84937850 |
| NKX2-5 | ---         | chr5:172,659,107-172,662,315 | AX-90033841 |
| NKX2-5 | rs104893900 | chr5:172,659,107-172,662,315 | AX-88756152 |

|        |             |                              |             |
|--------|-------------|------------------------------|-------------|
| NKX2-5 | ---         | chr5:172,659,107-172,662,315 | AX-90026351 |
| NKX2-5 | rs104893901 | chr5:172,659,107-172,662,315 | AX-88756153 |
| NKX2-5 | rs137852685 | chr5:172,659,107-172,662,315 | AX-90071019 |
| NKX2-5 | ---         | chr5:172,659,107-172,662,315 | AX-90055237 |
| NKX2-5 | rs201582515 | chr5:172,659,107-172,662,315 | AX-90068708 |
| NKX2-5 | ---         | chr5:172,659,107-172,662,315 | AX-90026353 |
| NKX2-5 | ---         | chr5:172,659,107-172,662,315 | AX-90026354 |
| NKX2-5 | rs387906774 | chr5:172,659,107-172,662,315 | AX-90027657 |
| NKX2-5 | rs137852684 | chr5:172,659,107-172,662,315 | AX-83152307 |
| NKX2-5 | rs200039950 | chr5:172,659,107-172,662,315 | AX-83000946 |
| NKX2-5 | ---         | chr5:172,659,107-172,662,315 | AX-90064511 |
| NKX2-5 | ---         | chr5:172,659,107-172,662,315 | AX-90058035 |
| NKX2-5 | ---         | chr5:172,659,107-172,662,315 | AX-90074177 |
| NKX2-5 | ---         | chr5:172,659,107-172,662,315 | AX-90081263 |
| NKX2-5 | ---         | chr5:172,659,107-172,662,315 | AX-90043951 |
| NKX2-5 | rs530270916 | chr5:172,659,107-172,662,315 | AX-90057291 |
| NKX2-5 | rs387906775 | chr5:172,659,107-172,662,315 | AX-90064025 |
| NKX2-5 | ---         | chr5:172,659,107-172,662,315 | AX-90056671 |
| NKX2-5 | ---         | chr5:172,659,107-172,662,315 | AX-90079688 |
| NKX2-5 | ---         | chr5:172,659,107-172,662,315 | AX-90027397 |
| NKX2-5 | rs113818864 | chr5:172,659,107-172,662,315 | AX-83127340 |
| NKX2-5 | ---         | chr5:172,659,107-172,662,315 | AX-90031530 |
| NKX2-5 | ---         | chr5:172,659,107-172,662,315 | AX-90058774 |
| NKX2-5 | ---         | chr5:172,659,107-172,662,315 | AX-83070044 |
| NKX2-5 | ---         | chr5:172,659,107-172,662,315 | AX-90034772 |
| NOTCH1 | rs111627256 | chr9:139,388,896-139,440,238 | AX-83370234 |
| NOTCH1 | rs13301342  | chr9:139,388,896-139,440,238 | AX-42570265 |
| NOTCH1 | rs557319054 | chr9:139,388,896-139,440,238 | AX-90026396 |
| NOTCH1 | rs2229968   | chr9:139,388,896-139,440,238 | AX-36923409 |
| NOTCH1 | rs76371972  | chr9:139,388,896-139,440,238 | AX-69104722 |
| NOTCH1 | rs199860726 | chr9:139,388,896-139,440,238 | AX-82984307 |
| NOTCH1 | rs41309766  | chr9:139,388,896-139,440,238 | AX-88767936 |
| NOTCH1 | ---         | chr9:139,388,896-139,440,238 | AX-90031176 |
| NOTCH1 | rs191645600 | chr9:139,388,896-139,440,238 | AX-83335053 |
| NOTCH1 | rs201215245 | chr9:139,388,896-139,440,238 | AX-83061255 |
| NOTCH1 | rs183156491 | chr9:139,388,896-139,440,238 | AX-83462637 |
| NOTCH1 | rs11145764  | chr9:139,388,896-139,440,238 | AX-36923411 |
| NOTCH1 | rs61751543  | chr9:139,388,896-139,440,238 | AX-83533615 |
| NOTCH1 | rs182330532 | chr9:139,388,896-139,440,238 | AX-83504650 |
| NOTCH1 | ---         | chr9:139,388,896-139,440,238 | AX-90034091 |
| NOTCH1 | rs3812603   | chr9:139,388,896-139,440,238 | AX-42570299 |
| NOTCH1 | rs3124599   | chr9:139,388,896-139,440,238 | AX-42570305 |
| NOTCH1 | rs11145766  | chr9:139,388,896-139,440,238 | AX-42570311 |
| NOTCH1 | rs201620358 | chr9:139,388,896-139,440,238 | AX-83568398 |
| NOTCH1 | rs199506721 | chr9:139,388,896-139,440,238 | AX-83530699 |
| NOTCH1 | rs9411206   | chr9:139,388,896-139,440,238 | AX-36923459 |
| NOTCH1 | rs35136134  | chr9:139,388,896-139,440,238 | AX-83022691 |
| NOTCH1 | rs77596271  | chr9:139,388,896-139,440,238 | AX-36923475 |
| NOTCH1 | rs199719103 | chr9:139,388,896-139,440,238 | AX-83539539 |
| NOTCH1 | ---         | chr9:139,388,896-139,440,238 | AX-83173353 |
| NOTCH1 | rs9411207   | chr9:139,388,896-139,440,238 | AX-36923483 |
| NOTCH1 | rs79782048  | chr9:139,388,896-139,440,238 | AX-83588486 |
| NOTCH1 | rs201077220 | chr9:139,388,896-139,440,238 | AX-83265431 |
| NOTCH1 | ---         | chr9:139,388,896-139,440,238 | AX-90079160 |
| NOTCH1 | rs138504021 | chr9:139,388,896-139,440,238 | AX-83461579 |

|        |             |                              |             |
|--------|-------------|------------------------------|-------------|
| NOTCH1 | rs61755997  | chr9:139,388,896-139,440,238 | AX-86587434 |
| NOTCH1 | rs9411208   | chr9:139,388,896-139,440,238 | AX-36923517 |
| NOTCH1 | ---         | chr9:139,388,896-139,440,238 | AX-83535214 |
| NOTCH1 | rs3124608   | chr9:139,388,896-139,440,238 | AX-36923567 |
| NOTCH1 | rs35863377  | chr9:139,388,896-139,440,238 | AX-36923571 |
| NOTCH1 | rs13290840  | chr9:139,388,896-139,440,238 | AX-36923589 |
| NOTCH1 | rs11145770  | chr9:139,388,896-139,440,238 | AX-42570357 |
| NOTCH1 | rs10870080  | chr9:139,388,896-139,440,238 | AX-36923599 |
| NOTCH1 | rs3013302   | chr9:139,388,896-139,440,238 | AX-42570365 |
| NOTCH1 | rs3013305   | chr9:139,388,896-139,440,238 | AX-36923653 |
| NOTCH1 | rs114832250 | chr9:139,388,896-139,440,238 | AX-55276551 |
| NOTCH2 | rs35586704  | chr1:120,454,176-120,612,317 | AX-83399206 |
| NOTCH2 | rs75831573  | chr1:120,454,176-120,612,317 | AX-83311672 |
| NOTCH2 | rs150516342 | chr1:120,454,176-120,612,317 | AX-83392205 |
| NOTCH2 | rs143236410 | chr1:120,454,176-120,612,317 | AX-83545615 |
| NOTCH2 | ---         | chr1:120,454,176-120,612,317 | AX-94360429 |
| NOTCH2 | rs17258579  | chr1:120,454,176-120,612,317 | AX-11316585 |
| NOTCH2 | rs118188023 | chr1:120,454,176-120,612,317 | AX-86634716 |
| NOTCH2 | rs61752484  | chr1:120,454,176-120,612,317 | AX-16554678 |
| NOTCH2 | rs4659248   | chr1:120,454,176-120,612,317 | AX-11515825 |
| NOTCH2 | rs147223770 | chr1:120,454,176-120,612,317 | AX-83411972 |
| NOTCH2 | rs7543643   | chr1:120,454,176-120,612,317 | AX-12631533 |
| NOTCH2 | rs140311741 | chr1:120,454,176-120,612,317 | AX-83316341 |
| NOTCH2 | rs77801324  | chr1:120,454,176-120,612,317 | AX-16554792 |
| NOTCH2 | rs17024584  | chr1:120,454,176-120,612,317 | AX-39026899 |
| NOTCH2 | rs77542178  | chr1:120,454,176-120,612,317 | AX-16554820 |
| NOTCH2 | rs17258599  | chr1:120,454,176-120,612,317 | AX-11316586 |
| NOTCH2 | rs10923931  | chr1:120,454,176-120,612,317 | AX-11131906 |
| NOTCH2 | rs116062645 | chr1:120,454,176-120,612,317 | AX-16554843 |
| NOTCH2 | rs12132511  | chr1:120,454,176-120,612,317 | AX-29989143 |
| OBSCN  | rs117484136 | chr1:228,395,831-228,566,575 | AX-37442395 |
| OBSCN  | rs199979779 | chr1:228,395,831-228,566,575 | AX-83497732 |
| OBSCN  | ---         | chr1:228,395,831-228,566,575 | AX-86605763 |
| OBSCN  | rs1771487   | chr1:228,395,831-228,566,575 | AX-83357471 |
| OBSCN  | rs2776853   | chr1:228,395,831-228,566,575 | AX-50090340 |
| OBSCN  | rs200897000 | chr1:228,395,831-228,566,575 | AX-83022697 |
| OBSCN  | rs180689095 | chr1:228,395,831-228,566,575 | AX-83597811 |
| OBSCN  | rs187569658 | chr1:228,395,831-228,566,575 | AX-83564049 |
| OBSCN  | rs199747438 | chr1:228,395,831-228,566,575 | AX-83512272 |
| OBSCN  | rs144514297 | chr1:228,395,831-228,566,575 | AX-83375589 |
| OBSCN  | ---         | chr1:228,395,831-228,566,575 | AX-90045387 |
| OBSCN  | rs1757157   | chr1:228,395,831-228,566,575 | AX-16916970 |
| OBSCN  | rs201224400 | chr1:228,395,831-228,566,575 | AX-83325166 |
| OBSCN  | rs138166465 | chr1:228,395,831-228,566,575 | AX-83469055 |
| OBSCN  | ---         | chr1:228,395,831-228,566,575 | AX-86572050 |
| OBSCN  | rs201854668 | chr1:228,395,831-228,566,575 | AX-82991021 |
| OBSCN  | rs6426495   | chr1:228,395,831-228,566,575 | AX-30661571 |
| OBSCN  | rs74142677  | chr1:228,395,831-228,566,575 | AX-16917117 |
| OBSCN  | rs185523702 | chr1:228,395,831-228,566,575 | AX-83560907 |
| OBSCN  | rs540662    | chr1:228,395,831-228,566,575 | AX-30661677 |
| OBSCN  | rs199646052 | chr1:228,395,831-228,566,575 | AX-83355164 |
| OBSCN  | ---         | chr1:228,395,831-228,566,575 | AX-90028608 |
| OBSCN  | rs1188724   | chr1:228,395,831-228,566,575 | AX-30661743 |
| OBSCN  | rs200483572 | chr1:228,395,831-228,566,575 | AX-83284442 |
| OBSCN  | rs201790471 | chr1:228,395,831-228,566,575 | AX-83260665 |

|       |             |                              |             |
|-------|-------------|------------------------------|-------------|
| OBSCN | rs200490850 | chr1:228,395,831-228,566,575 | AX-83101234 |
| OBSCN | rs1188721   | chr1:228,395,831-228,566,575 | AX-39378935 |
| OBSCN | rs1188722   | chr1:228,395,831-228,566,575 | AX-82927695 |
| OBSCN | rs75280352  | chr1:228,395,831-228,566,575 | AX-83406319 |
| OBSCN | rs201269256 | chr1:228,395,831-228,566,575 | AX-83556628 |
| OBSCN | ---         | chr1:228,395,831-228,566,575 | AX-86662388 |
| OBSCN | ---         | chr1:228,395,831-228,566,575 | AX-86624453 |
| OBSCN | ---         | chr1:228,395,831-228,566,575 | AX-86556897 |
| OBSCN | rs200720682 | chr1:228,395,831-228,566,575 | AX-83415926 |
| OBSCN | ---         | chr1:228,395,831-228,566,575 | AX-86629217 |
| OBSCN | rs3795783   | chr1:228,395,831-228,566,575 | AX-30661803 |
| OBSCN | rs202052558 | chr1:228,395,831-228,566,575 | AX-83290250 |
| OBSCN | rs12061320  | chr1:228,395,831-228,566,575 | AX-12427238 |
| OBSCN | rs1188697   | chr1:228,395,831-228,566,575 | AX-83306671 |
| OBSCN | rs150312546 | chr1:228,395,831-228,566,575 | AX-83052506 |
| OBSCN | rs181194866 | chr1:228,395,831-228,566,575 | AX-83238214 |
| OBSCN | rs3795785   | chr1:228,395,831-228,566,575 | AX-82959911 |
| OBSCN | rs56168609  | chr1:228,395,831-228,566,575 | AX-30661829 |
| OBSCN | rs201858717 | chr1:228,395,831-228,566,575 | AX-83125990 |
| OBSCN | rs3795789   | chr1:228,395,831-228,566,575 | AX-83188604 |
| OBSCN | rs4653546   | chr1:228,395,831-228,566,575 | AX-30661875 |
| OBSCN | rs79902706  | chr1:228,395,831-228,566,575 | AX-30661881 |
| OBSCN | rs199641194 | chr1:228,395,831-228,566,575 | AX-83488706 |
| OBSCN | rs56218706  | chr1:228,395,831-228,566,575 | AX-30661907 |
| OBSCN | rs147471011 | chr1:228,395,831-228,566,575 | AX-83526668 |
| OBSCN | ---         | chr1:228,395,831-228,566,575 | AX-83402548 |
| OBSCN | rs564636    | chr1:228,395,831-228,566,575 | AX-39379025 |
| OBSCN | ---         | chr1:228,395,831-228,566,575 | AX-86730469 |
| OBSCN | ---         | chr1:228,395,831-228,566,575 | AX-86597266 |
| OBSCN | rs56021350  | chr1:228,395,831-228,566,575 | AX-30661931 |
| OBSCN | ---         | chr1:228,395,831-228,566,575 | AX-86633119 |
| OBSCN | rs61825286  | chr1:228,395,831-228,566,575 | AX-30661957 |
| OBSCN | rs11584418  | chr1:228,395,831-228,566,575 | AX-39379053 |
| OBSCN | rs41270183  | chr1:228,395,831-228,566,575 | AX-11491388 |
| OBSCN | rs201781739 | chr1:228,395,831-228,566,575 | AX-83069701 |
| OBSCN | rs201908193 | chr1:228,395,831-228,566,575 | AX-83322998 |
| OBSCN | ---         | chr1:228,395,831-228,566,575 | AX-86548208 |
| OBSCN | rs435776    | chr1:228,395,831-228,566,575 | AX-83424283 |
| OBSCN | rs55704206  | chr1:228,395,831-228,566,575 | AX-30662011 |
| OBSCN | rs1150912   | chr1:228,395,831-228,566,575 | AX-83420821 |
| OBSCN | rs116266256 | chr1:228,395,831-228,566,575 | AX-30662077 |
| OBSCN | rs1188732   | chr1:228,395,831-228,566,575 | AX-83115605 |
| OBSCN | rs61825301  | chr1:228,395,831-228,566,575 | AX-30662091 |
| OBSCN | rs4653942   | chr1:228,395,831-228,566,575 | AX-83401047 |
| OBSCN | ---         | chr1:228,395,831-228,566,575 | AX-39379105 |
| OBSCN | rs200399314 | chr1:228,395,831-228,566,575 | AX-83351806 |
| OBSCN | rs3795800   | chr1:228,395,831-228,566,575 | AX-39379107 |
| OBSCN | rs3795801   | chr1:228,395,831-228,566,575 | AX-83538127 |
| OBSCN | rs371732381 | chr1:228,395,831-228,566,575 | AX-86547430 |
| OBSCN | rs200354373 | chr1:228,395,831-228,566,575 | AX-83474162 |
| OBSCN | rs142983293 | chr1:228,395,831-228,566,575 | AX-83551569 |
| OBSCN | ---         | chr1:228,395,831-228,566,575 | AX-86577014 |
| OBSCN | rs373610    | chr1:228,395,831-228,566,575 | AX-39379121 |
| OBSCN | rs41305122  | chr1:228,395,831-228,566,575 | AX-57094057 |
| OBSCN | rs56359770  | chr1:228,395,831-228,566,575 | AX-83173967 |

|       |             |                              |             |
|-------|-------------|------------------------------|-------------|
| OBSCN | ---         | chr1:228,395,831-228,566,575 | AX-86616889 |
| OBSCN | rs78577753  | chr1:228,395,831-228,566,575 | AX-30662169 |
| OBSCN | rs287611    | chr1:228,395,831-228,566,575 | AX-39379139 |
| OBSCN | rs287608    | chr1:228,395,831-228,566,575 | AX-30662193 |
| OBSCN | rs56015866  | chr1:228,395,831-228,566,575 | AX-83580553 |
| OBSCN | ---         | chr1:228,395,831-228,566,575 | AX-86738582 |
| OBSCN | rs113760892 | chr1:228,395,831-228,566,575 | AX-83123470 |
| OBSCN | ---         | chr1:228,395,831-228,566,575 | AX-86702581 |
| OBSCN | rs199638902 | chr1:228,395,831-228,566,575 | AX-83263859 |
| OBSCN | rs200706907 | chr1:228,395,831-228,566,575 | AX-83292312 |
| OBSCN | rs3795809   | chr1:228,395,831-228,566,575 | AX-83072278 |
| OBSCN | ---         | chr1:228,395,831-228,566,575 | AX-90083169 |
| OBSCN | rs191098985 | chr1:228,395,831-228,566,575 | AX-82929967 |
| OBSCN | ---         | chr1:228,395,831-228,566,575 | AX-86615996 |
| OBSCN | rs56065114  | chr1:228,395,831-228,566,575 | AX-30662279 |
| OBSCN | rs200362121 | chr1:228,395,831-228,566,575 | AX-82970327 |
| OBSCN | rs1188710   | chr1:228,395,831-228,566,575 | AX-83079097 |
| OBSCN | ---         | chr1:228,395,831-228,566,575 | AX-86714262 |
| OBSCN | rs78584475  | chr1:228,395,831-228,566,575 | AX-30662311 |
| OBSCN | ---         | chr1:228,395,831-228,566,575 | AX-83174268 |
| OBSCN | rs140996408 | chr1:228,395,831-228,566,575 | AX-83337418 |
| OBSCN | rs3795812   | chr1:228,395,831-228,566,575 | AX-39379229 |
| OBSCN | rs883748    | chr1:228,395,831-228,566,575 | AX-30662381 |
| OBSCN | ---         | chr1:228,395,831-228,566,575 | AX-86570417 |
| OBSCN | rs75458225  | chr1:228,395,831-228,566,575 | AX-30662421 |
| OBSCN | ---         | chr1:228,395,831-228,566,575 | AX-86623717 |
| OBSCN | rs12035900  | chr1:228,395,831-228,566,575 | AX-39379271 |
| OBSCN | rs145544878 | chr1:228,395,831-228,566,575 | AX-83320677 |
| OBSCN | rs376526801 | chr1:228,395,831-228,566,575 | AX-86700852 |
| OBSCN | rs35155240  | chr1:228,395,831-228,566,575 | AX-30662441 |
| OBSCN | rs11585049  | chr1:228,395,831-228,566,575 | AX-83025254 |
| OBSCN | rs35937215  | chr1:228,395,831-228,566,575 | AX-30662457 |
| OBSCN | rs9727719   | chr1:228,395,831-228,566,575 | AX-30662459 |
| OBSCN | rs55756479  | chr1:228,395,831-228,566,575 | AX-30662469 |
| OBSCN | rs200436705 | chr1:228,395,831-228,566,575 | AX-83393133 |
| OBSCN | ---         | chr1:228,395,831-228,566,575 | AX-86597977 |
| OBSCN | rs145597580 | chr1:228,395,831-228,566,575 | AX-82905391 |
| OBSCN | rs202236799 | chr1:228,395,831-228,566,575 | AX-82998279 |
| OBSCN | rs35186354  | chr1:228,395,831-228,566,575 | AX-83481881 |
| OBSCN | rs201092597 | chr1:228,395,831-228,566,575 | AX-82996254 |
| OBSCN | rs41305136  | chr1:228,395,831-228,566,575 | AX-83504494 |
| OBSCN | rs560303483 | chr1:228,395,831-228,566,575 | AX-90033028 |
| OBSCN | ---         | chr1:228,395,831-228,566,575 | AX-86717665 |
| OBSCN | rs72762066  | chr1:228,395,831-228,566,575 | AX-30662511 |
| OBSCN | rs500049    | chr1:228,395,831-228,566,575 | AX-83570182 |
| OBSCN | rs202143056 | chr1:228,395,831-228,566,575 | AX-83226923 |
| OBSCN | rs199507775 | chr1:228,395,831-228,566,575 | AX-83570767 |
| OBSCN | rs200271514 | chr1:228,395,831-228,566,575 | AX-86587928 |
| OBSCN | rs377449573 | chr1:228,395,831-228,566,575 | AX-86677436 |
| OBSCN | ---         | chr1:228,395,831-228,566,575 | AX-90045430 |
| OBSCN | rs144017124 | chr1:228,395,831-228,566,575 | AX-83455018 |
| OBSCN | rs199866528 | chr1:228,395,831-228,566,575 | AX-83483102 |
| OBSCN | rs200898403 | chr1:228,395,831-228,566,575 | AX-83443973 |
| OBSCN | rs56174824  | chr1:228,395,831-228,566,575 | AX-83530358 |
| OBSCN | rs182714476 | chr1:228,395,831-228,566,575 | AX-83317773 |

|        |             |                              |             |
|--------|-------------|------------------------------|-------------|
| OBSCN  | rs61730829  | chr1:228,395,831-228,566,575 | AX-30662561 |
| PDLIM3 | rs1801942   | chr4:186,421,815-186,456,712 | AX-11344751 |
| PDLIM3 | rs4635850   | chr4:186,421,815-186,456,712 | AX-14615153 |
| PDLIM3 | rs72715912  | chr4:186,421,815-186,456,712 | AX-34733565 |
| PDLIM3 | rs62347360  | chr4:186,421,815-186,456,712 | AX-83049245 |
| PDLIM3 | rs2306706   | chr4:186,421,815-186,456,712 | AX-11384069 |
| PDLIM3 | rs76900032  | chr4:186,421,815-186,456,712 | AX-14615172 |
| PDLIM3 | rs10446841  | chr4:186,421,815-186,456,712 | AX-11107138 |
| PDLIM3 | rs11944325  | chr4:186,421,815-186,456,712 | AX-41435889 |
| PDLIM3 | rs4605697   | chr4:186,421,815-186,456,712 | AX-34733603 |
| PDLIM3 | ---         | chr4:186,421,815-186,456,712 | AX-34733619 |
| PDLIM3 | rs200354645 | chr4:186,421,815-186,456,712 | AX-83064570 |
| PDLIM3 | rs148570356 | chr4:186,421,815-186,456,712 | AX-83441411 |
| PDLIM3 | rs199476399 | chr4:186,421,815-186,456,712 | AX-86693420 |
| PDLIM3 | rs142951316 | chr4:186,421,815-186,456,712 | AX-83266358 |
| PDLIM3 | rs7664940   | chr4:186,421,815-186,456,712 | AX-14615229 |
| PDLIM3 | rs72715925  | chr4:186,421,815-186,456,712 | AX-34733671 |
| PKP2   | ---         | chr12:32,943,680-33,049,780  | AX-94368624 |
| PKP2   | rs370599966 | chr12:32,943,680-33,049,780  | AX-91987228 |
| PKP2   | ---         | chr12:32,943,680-33,049,780  | AX-90079668 |
| PKP2   | ---         | chr12:32,943,680-33,049,780  | AX-90054753 |
| PKP2   | ---         | chr12:32,943,680-33,049,780  | AX-90071491 |
| PKP2   | ---         | chr12:32,943,680-33,049,780  | AX-90062120 |
| PKP2   | rs149968852 | chr12:32,943,680-33,049,780  | AX-83166542 |
| PKP2   | ---         | chr12:32,943,680-33,049,780  | AX-90059422 |
| PKP2   | ---         | chr12:32,943,680-33,049,780  | AX-90060352 |
| PKP2   | ---         | chr12:32,943,680-33,049,780  | AX-94379401 |
| PKP2   | rs142362933 | chr12:32,943,680-33,049,780  | AX-92015445 |
| PKP2   | rs151264959 | chr12:32,943,680-33,049,780  | AX-82927945 |
| PKP2   | ---         | chr12:32,943,680-33,049,780  | AX-90034559 |
| PKP2   | ---         | chr12:32,943,680-33,049,780  | AX-94379402 |
| PKP2   | rs200947767 | chr12:32,943,680-33,049,780  | AX-91977809 |
| PKP2   | rs139734328 | chr12:32,943,680-33,049,780  | AX-82901855 |
| PKP2   | ---         | chr12:32,943,680-33,049,780  | AX-94380924 |
| PKP2   | ---         | chr12:32,943,680-33,049,780  | AX-90078101 |
| PKP2   | ---         | chr12:32,943,680-33,049,780  | AX-90054755 |
| PKP2   | ---         | chr12:32,943,680-33,049,780  | AX-90042607 |
| PKP2   | ---         | chr12:32,943,680-33,049,780  | AX-90054756 |
| PKP2   | ---         | chr12:32,943,680-33,049,780  | AX-90025872 |
| PKP2   | ---         | chr12:32,943,680-33,049,780  | AX-94379404 |
| PKP2   | ---         | chr12:32,943,680-33,049,780  | AX-94362655 |
| PKP2   | rs201487421 | chr12:32,943,680-33,049,780  | AX-94349465 |
| PKP2   | rs35826324  | chr12:32,943,680-33,049,780  | AX-16941424 |
| PKP2   | rs11615932  | chr12:32,943,680-33,049,780  | AX-11162678 |
| PKP2   | rs74072938  | chr12:32,943,680-33,049,780  | AX-16941437 |
| PKP2   | ---         | chr12:32,943,680-33,049,780  | AX-94379406 |
| PKP2   | rs139098675 | chr12:32,943,680-33,049,780  | AX-92019704 |
| PKP2   | rs547215531 | chr12:32,943,680-33,049,780  | AX-94362657 |
| PKP2   | rs121434421 | chr12:32,943,680-33,049,780  | AX-88795816 |
| PKP2   | rs397517021 | chr12:32,943,680-33,049,780  | AX-91993938 |
| PKP2   | ---         | chr12:32,943,680-33,049,780  | AX-90054758 |
| PKP2   | ---         | chr12:32,943,680-33,049,780  | AX-94379408 |
| PKP2   | rs193922674 | chr12:32,943,680-33,049,780  | AX-86566512 |
| PKP2   | rs11052259  | chr12:32,943,680-33,049,780  | AX-12405408 |
| PKP2   | rs73090732  | chr12:32,943,680-33,049,780  | AX-16941468 |

|      |             |                             |             |
|------|-------------|-----------------------------|-------------|
| PKP2 | rs77624714  | chr12:32,943,680-33,049,780 | AX-30706725 |
| PKP2 | rs4931044   | chr12:32,943,680-33,049,780 | AX-16941475 |
| PKP2 | ---         | chr12:32,943,680-33,049,780 | AX-94379409 |
| PKP2 | ---         | chr12:32,943,680-33,049,780 | AX-90030316 |
| PKP2 | rs397517017 | chr12:32,943,680-33,049,780 | AX-90054759 |
| PKP2 | ---         | chr12:32,943,680-33,049,780 | AX-90054760 |
| PKP2 | ---         | chr12:32,943,680-33,049,780 | AX-90048312 |
| PKP2 | ---         | chr12:32,943,680-33,049,780 | AX-94380925 |
| PKP2 | rs199583774 | chr12:32,943,680-33,049,780 | AX-91997508 |
| PKP2 | ---         | chr12:32,943,680-33,049,780 | AX-90071493 |
| PKP2 | rs144601090 | chr12:32,943,680-33,049,780 | AX-86676334 |
| PKP2 | ---         | chr12:32,943,680-33,049,780 | AX-90054761 |
| PKP2 | ---         | chr12:32,943,680-33,049,780 | AX-90031793 |
| PKP2 | rs193922673 | chr12:32,943,680-33,049,780 | AX-88795857 |
| PKP2 | ---         | chr12:32,943,680-33,049,780 | AX-94379410 |
| PKP2 | ---         | chr12:32,943,680-33,049,780 | AX-90047537 |
| PKP2 | ---         | chr12:32,943,680-33,049,780 | AX-94362661 |
| PKP2 | ---         | chr12:32,943,680-33,049,780 | AX-90054762 |
| PKP2 | rs73090746  | chr12:32,943,680-33,049,780 | AX-30706787 |
| PKP2 | ---         | chr12:32,943,680-33,049,780 | AX-90054763 |
| PKP2 | ---         | chr12:32,943,680-33,049,780 | AX-86724815 |
| PKP2 | ---         | chr12:32,943,680-33,049,780 | AX-90071494 |
| PKP2 | ---         | chr12:32,943,680-33,049,780 | AX-94380700 |
| PKP2 | rs397517012 | chr12:32,943,680-33,049,780 | AX-90054764 |
| PKP2 | ---         | chr12:32,943,680-33,049,780 | AX-90054765 |
| PKP2 | ---         | chr12:32,943,680-33,049,780 | AX-90027487 |
| PKP2 | ---         | chr12:32,943,680-33,049,780 | AX-90054766 |
| PKP2 | ---         | chr12:32,943,680-33,049,780 | AX-90025882 |
| PKP2 | ---         | chr12:32,943,680-33,049,780 | AX-90054768 |
| PKP2 | ---         | chr12:32,943,680-33,049,780 | AX-94356287 |
| PKP2 | ---         | chr12:32,943,680-33,049,780 | AX-90080383 |
| PKP2 | ---         | chr12:32,943,680-33,049,780 | AX-90073725 |
| PKP2 | rs146102241 | chr12:32,943,680-33,049,780 | AX-83175800 |
| PKP2 | rs397517008 | chr12:32,943,680-33,049,780 | AX-90073382 |
| PKP2 | ---         | chr12:32,943,680-33,049,780 | AX-90072269 |
| PKP2 | ---         | chr12:32,943,680-33,049,780 | AX-90080115 |
| PKP2 | ---         | chr12:32,943,680-33,049,780 | AX-94380701 |
| PKP2 | rs397517005 | chr12:32,943,680-33,049,780 | AX-90050099 |
| PKP2 | ---         | chr12:32,943,680-33,049,780 | AX-94363953 |
| PKP2 | ---         | chr12:32,943,680-33,049,780 | AX-90034109 |
| PKP2 | rs2389109   | chr12:32,943,680-33,049,780 | AX-39402863 |
| PKP2 | rs7301365   | chr12:32,943,680-33,049,780 | AX-11619795 |
| PKP2 | rs11609744  | chr12:32,943,680-33,049,780 | AX-39402895 |
| PKP2 | rs35292063  | chr12:32,943,680-33,049,780 | AX-16941569 |
| PKP2 | rs397517003 | chr12:32,943,680-33,049,780 | AX-90034780 |
| PKP2 | ---         | chr12:32,943,680-33,049,780 | AX-90048907 |
| PKP2 | ---         | chr12:32,943,680-33,049,780 | AX-90032721 |
| PKP2 | ---         | chr12:32,943,680-33,049,780 | AX-90071495 |
| PKP2 | rs143782040 | chr12:32,943,680-33,049,780 | AX-16941597 |
| PKP2 | rs368740836 | chr12:32,943,680-33,049,780 | AX-91992050 |
| PKP2 | ---         | chr12:32,943,680-33,049,780 | AX-90045283 |
| PKP2 | ---         | chr12:32,943,680-33,049,780 | AX-90032373 |
| PKP2 | rs193922672 | chr12:32,943,680-33,049,780 | AX-88795856 |
| PKP2 | ---         | chr12:32,943,680-33,049,780 | AX-90050075 |
| PKP2 | rs147240502 | chr12:32,943,680-33,049,780 | AX-83018137 |



|      |             |                             |             |
|------|-------------|-----------------------------|-------------|
| PKP2 | rs146882581 | chr12:32,943,680-33,049,780 | AX-83054752 |
| PKP2 | ---         | chr12:32,943,680-33,049,780 | AX-90062771 |
| PKP2 | rs75650004  | chr12:32,943,680-33,049,780 | AX-16941601 |
| PKP2 | ---         | chr12:32,943,680-33,049,780 | AX-92006800 |
| PKP2 | rs373399921 | chr12:32,943,680-33,049,780 | AX-94373039 |
| PKP2 | rs139159464 | chr12:32,943,680-33,049,780 | AX-83128733 |
| PKP2 | rs79032918  | chr12:32,943,680-33,049,780 | AX-16941620 |
| PKP2 | rs7304398   | chr12:32,943,680-33,049,780 | AX-11619997 |
| PKP2 | ---         | chr12:32,943,680-33,049,780 | AX-90033062 |
| PKP2 | ---         | chr12:32,943,680-33,049,780 | AX-94373040 |
| PKP2 | ---         | chr12:32,943,680-33,049,780 | AX-90072747 |
| PKP2 | rs3748278   | chr12:32,943,680-33,049,780 | AX-92005743 |
| PKP2 | ---         | chr12:32,943,680-33,049,780 | AX-94356291 |
| PKP2 | rs397516990 | chr12:32,943,680-33,049,780 | AX-90025884 |
| PKP2 | ---         | chr12:32,943,680-33,049,780 | AX-90054770 |
| PKP2 | rs372827156 | chr12:32,943,680-33,049,780 | AX-86728805 |
| PKP2 | ---         | chr12:32,943,680-33,049,780 | AX-90079381 |
| PKP2 | rs192041220 | chr12:32,943,680-33,049,780 | AX-94349468 |
| PKP2 | ---         | chr12:32,943,680-33,049,780 | AX-94363954 |
| PKP2 | rs397516989 | chr12:32,943,680-33,049,780 | AX-90044197 |
| PKP2 | ---         | chr12:32,943,680-33,049,780 | AX-90071866 |
| PKP2 | ---         | chr12:32,943,680-33,049,780 | AX-94363956 |
| PKP2 | ---         | chr12:32,943,680-33,049,780 | AX-90045294 |
| PKP2 | ---         | chr12:32,943,680-33,049,780 | AX-94356292 |
| PKP2 | ---         | chr12:32,943,680-33,049,780 | AX-90029942 |
| PKP2 | rs76774152  | chr12:32,943,680-33,049,780 | AX-16941665 |
| PKP2 | rs79688317  | chr12:32,943,680-33,049,780 | AX-16941669 |
| PKP2 | rs75422105  | chr12:32,943,680-33,049,780 | AX-16941675 |
| PKP2 | rs78966607  | chr12:32,943,680-33,049,780 | AX-16941688 |
| PKP2 | rs1454933   | chr12:32,943,680-33,049,780 | AX-11265183 |
| PKP2 | ---         | chr12:32,943,680-33,049,780 | AX-90065813 |
| PKP2 | ---         | chr12:32,943,680-33,049,780 | AX-90054771 |
| PKP2 | ---         | chr12:32,943,680-33,049,780 | AX-94373043 |
| PKP2 | ---         | chr12:32,943,680-33,049,780 | AX-94373044 |
| PKP2 | rs397516986 | chr12:32,943,680-33,049,780 | AX-90054772 |
| PKP2 | rs56869013  | chr12:32,943,680-33,049,780 | AX-92038028 |
| PKP2 | rs142742483 | chr12:32,943,680-33,049,780 | AX-92013075 |
| PKP2 | ---         | chr12:32,943,680-33,049,780 | AX-83337500 |
| PKP2 | rs1046116   | chr12:32,943,680-33,049,780 | AX-11107882 |
| PKP2 | rs73090770  | chr12:32,943,680-33,049,780 | AX-30707059 |
| PKP2 | ---         | chr12:32,943,680-33,049,780 | AX-94376954 |
| PKP2 | rs139851304 | chr12:32,943,680-33,049,780 | AX-83048506 |
| PKP2 | ---         | chr12:32,943,680-33,049,780 | AX-94363957 |
| PKP2 | ---         | chr12:32,943,680-33,049,780 | AX-90065399 |
| PKP2 | ---         | chr12:32,943,680-33,049,780 | AX-90073352 |
| PKP2 | rs142636176 | chr12:32,943,680-33,049,780 | AX-91984612 |
| PKP2 | rs61729382  | chr12:32,943,680-33,049,780 | AX-91985130 |
| PKP2 | rs61729381  | chr12:32,943,680-33,049,780 | AX-92014858 |
| PKP2 | ---         | chr12:32,943,680-33,049,780 | AX-94373045 |
| PKP2 | ---         | chr12:32,943,680-33,049,780 | AX-90075826 |
| PKP2 | ---         | chr12:32,943,680-33,049,780 | AX-94363958 |
| PKP2 | rs201944276 | chr12:32,943,680-33,049,780 | AX-83311607 |
| PKP2 | rs3748279   | chr12:32,943,680-33,049,780 | AX-12559803 |
| PKP2 | ---         | chr12:32,943,680-33,049,780 | AX-94373046 |
| PKP2 | rs62001016  | chr12:32,943,680-33,049,780 | AX-37583959 |

|      |             |                             |             |
|------|-------------|-----------------------------|-------------|
| PKP2 | ---         | chr12:32,943,680-33,049,780 | AX-90061623 |
| PKP2 | ---         | chr12:32,943,680-33,049,780 | AX-94363959 |
| PKP2 | ---         | chr12:32,943,680-33,049,780 | AX-94356297 |
| PKP2 | ---         | chr12:32,943,680-33,049,780 | AX-90035930 |
| PKP2 | rs201580443 | chr12:32,943,680-33,049,780 | AX-94366224 |
| PKP2 | rs62001015  | chr12:32,943,680-33,049,780 | AX-83523606 |
| PKP2 | ---         | chr12:32,943,680-33,049,780 | AX-86606553 |
| PKP2 | ---         | chr12:32,943,680-33,049,780 | AX-90054773 |
| PKP2 | ---         | chr12:32,943,680-33,049,780 | AX-90043416 |
| PKP2 | ---         | chr12:32,943,680-33,049,780 | AX-90054774 |
| PKP2 | ---         | chr12:32,943,680-33,049,780 | AX-94356298 |
| PKP2 | ---         | chr12:32,943,680-33,049,780 | AX-90073062 |
| PKP2 | ---         | chr12:32,943,680-33,049,780 | AX-94362662 |
| PKP2 | ---         | chr12:32,943,680-33,049,780 | AX-94364178 |
| PKP2 | ---         | chr12:32,943,680-33,049,780 | AX-90077485 |
| PKP2 | ---         | chr12:32,943,680-33,049,780 | AX-94362663 |
| PKP2 | rs397517027 | chr12:32,943,680-33,049,780 | AX-86714092 |
| PKP2 | rs199643407 | chr12:32,943,680-33,049,780 | AX-90082264 |
| PKP2 | rs2389115   | chr12:32,943,680-33,049,780 | AX-91976080 |
| PKP2 | ---         | chr12:32,943,680-33,049,780 | AX-94362664 |
| PKP2 | ---         | chr12:32,943,680-33,049,780 | AX-94362665 |
| PKP2 | ---         | chr12:32,943,680-33,049,780 | AX-90025890 |
| PKP2 | ---         | chr12:32,943,680-33,049,780 | AX-94362666 |
| PKP2 | ---         | chr12:32,943,680-33,049,780 | AX-90025891 |
| PKP2 | rs139215336 | chr12:32,943,680-33,049,780 | AX-82994891 |
| PKP2 | rs149542398 | chr12:32,943,680-33,049,780 | AX-83294881 |
| PKP2 | ---         | chr12:32,943,680-33,049,780 | AX-90054777 |
| PKP2 | ---         | chr12:32,943,680-33,049,780 | AX-94362667 |
| PKP2 | ---         | chr12:32,943,680-33,049,780 | AX-90054778 |
| PKP2 | ---         | chr12:32,943,680-33,049,780 | AX-90076001 |
| PKP2 | rs121434420 | chr12:32,943,680-33,049,780 | AX-88795815 |
| PKP2 | ---         | chr12:32,943,680-33,049,780 | AX-90029868 |
| PKP2 | rs11052283  | chr12:32,943,680-33,049,780 | AX-39403077 |
| PKP2 | rs79323236  | chr12:32,943,680-33,049,780 | AX-30707177 |
| PKP2 | rs7302851   | chr12:32,943,680-33,049,780 | AX-39403091 |
| PKP2 | rs4420362   | chr12:32,943,680-33,049,780 | AX-39403123 |
| PKP2 | rs7959358   | chr12:32,943,680-33,049,780 | AX-39403129 |
| PKP2 | rs74072972  | chr12:32,943,680-33,049,780 | AX-16941758 |
| PKP2 | rs56969496  | chr12:32,943,680-33,049,780 | AX-30707229 |
| PKP2 | ---         | chr12:32,943,680-33,049,780 | AX-90058392 |
| PKP2 | rs75909145  | chr12:32,943,680-33,049,780 | AX-83480287 |
| PKP2 | rs397517014 | chr12:32,943,680-33,049,780 | AX-91981242 |
| PKP2 | ---         | chr12:32,943,680-33,049,780 | AX-94351847 |
| PKP2 | ---         | chr12:32,943,680-33,049,780 | AX-90079586 |
| PKP2 | ---         | chr12:32,943,680-33,049,780 | AX-94364179 |
| PKP2 | ---         | chr12:32,943,680-33,049,780 | AX-90046883 |
| PKP2 | rs199601548 | chr12:32,943,680-33,049,780 | AX-83251253 |
| PKP2 | ---         | chr12:32,943,680-33,049,780 | AX-86723204 |
| PKP2 | rs146708884 | chr12:32,943,680-33,049,780 | AX-82905670 |
| PKP2 | ---         | chr12:32,943,680-33,049,780 | AX-94379418 |
| PKP2 | rs201210997 | chr12:32,943,680-33,049,780 | AX-86567210 |
| PKP2 | ---         | chr12:32,943,680-33,049,780 | AX-94380929 |
| PKP2 | ---         | chr12:32,943,680-33,049,780 | AX-90079601 |
| PKP2 | ---         | chr12:32,943,680-33,049,780 | AX-94364181 |
| PKP2 | rs143004808 | chr12:32,943,680-33,049,780 | AX-83409678 |

|        |             |                              |              |
|--------|-------------|------------------------------|--------------|
| PKP2   | ---         | chr12:32,943,680-33,049,780  | AX-94362669  |
| PKP2   | ---         | chr12:32,943,680-33,049,780  | AX-94362670  |
| PLN    | rs3752581   | chr6:118,869,442-118,881,587 | AX-156276038 |
| PLN    | rs3752581   | chr6:118,869,442-118,881,587 | AX-156293052 |
| PLN    | rs12211576  | chr6:118,869,442-118,881,587 | AX-35523691  |
| PLN    | rs34030625  | chr6:118,869,442-118,881,587 | AX-151169828 |
| PLN    | rs34030625  | chr6:118,869,442-118,881,587 | AX-156284247 |
| PLN    | rs9489436   | chr6:118,869,442-118,881,587 | AX-156276039 |
| PLN    | rs73766547  | chr6:118,869,442-118,881,587 | AX-156276040 |
| PLN    | rs73766547  | chr6:118,869,442-118,881,587 | AX-156293054 |
| PLN    | rs9489437   | chr6:118,869,442-118,881,587 | AX-156276041 |
| PLN    | rs9489437   | chr6:118,869,442-118,881,587 | AX-156293055 |
| PLN    | rs13192336  | chr6:118,869,442-118,881,587 | AX-156276042 |
| PLN    | rs13192574  | chr6:118,869,442-118,881,587 | AX-148058677 |
| PLN    | rs13192574  | chr6:118,869,442-118,881,587 | AX-156276043 |
| PLN    | rs12153938  | chr6:118,869,442-118,881,587 | AX-119373847 |
| PLN    | rs12153938  | chr6:118,869,442-118,881,587 | AX-148154169 |
| PLN    | rs12153955  | chr6:118,869,442-118,881,587 | AX-41830225  |
| PLN    | rs9481825   | chr6:118,869,442-118,881,587 | AX-15209795  |
| PLN    | rs9481826   | chr6:118,869,442-118,881,587 | AX-122963132 |
| PLN    | rs2356497   | chr6:118,869,442-118,881,587 | AX-105165603 |
| PLN    | rs9489438   | chr6:118,869,442-118,881,587 | AX-156276044 |
| PLN    | rs9489438   | chr6:118,869,442-118,881,587 | AX-156293056 |
| PLN    | rs9489439   | chr6:118,869,442-118,881,587 | AX-15209800  |
| PLN    | rs11753886  | chr6:118,869,442-118,881,587 | AX-112924501 |
| PLN    | rs11753886  | chr6:118,869,442-118,881,587 | AX-112998577 |
| PLN    | rs111033559 | chr6:118,869,442-118,881,587 | AX-90071066  |
| PLN    | ---         | chr6:118,869,442-118,881,587 | AX-90033888  |
| PLN    | ---         | chr6:118,869,442-118,881,587 | AX-90074970  |
| PLN    | rs111033560 | chr6:118,869,442-118,881,587 | AX-86704343  |
| PLN    | ---         | chr6:118,869,442-118,881,587 | AX-15209804  |
| PRKAG2 | rs17714947  | chr7:151,253,201-151,574,316 | AX-42144857  |
| PRKAG2 | rs113234987 | chr7:151,253,201-151,574,316 | AX-15612357  |
| PRKAG2 | rs6464147   | chr7:151,253,201-151,574,316 | AX-42144877  |
| PRKAG2 | rs267606979 | chr7:151,253,201-151,574,316 | AX-90055261  |
| PRKAG2 | rs28763998  | chr7:151,253,201-151,574,316 | AX-42144879  |
| PRKAG2 | rs201542789 | chr7:151,253,201-151,574,316 | AX-83055148  |
| PRKAG2 | ---         | chr7:151,253,201-151,574,316 | AX-88757021  |
| PRKAG2 | rs121908990 | chr7:151,253,201-151,574,316 | AX-90042275  |
| PRKAG2 | rs267606977 | chr7:151,253,201-151,574,316 | AX-90031280  |
| PRKAG2 | ---         | chr7:151,253,201-151,574,316 | AX-90034042  |
| PRKAG2 | rs267606976 | chr7:151,253,201-151,574,316 | AX-90027486  |
| PRKAG2 | rs17642575  | chr7:151,253,201-151,574,316 | AX-12502368  |
| PRKAG2 | rs28938173  | chr7:151,253,201-151,574,316 | AX-88756944  |
| PRKAG2 | rs121908988 | chr7:151,253,201-151,574,316 | AX-90042273  |
| PRKAG2 | rs2302530   | chr7:151,253,201-151,574,316 | AX-11383641  |
| PRKAG2 | rs74378494  | chr7:151,253,201-151,574,316 | AX-15612400  |
| PRKAG2 | ---         | chr7:151,253,201-151,574,316 | AX-90074819  |
| PRKAG2 | rs121908987 | chr7:151,253,201-151,574,316 | AX-90042272  |
| PRKAG2 | rs6953900   | chr7:151,253,201-151,574,316 | AX-15612430  |
| PRKAG2 | rs2538038   | chr7:151,253,201-151,574,316 | AX-11397474  |
| PRKAG2 | rs2538045   | chr7:151,253,201-151,574,316 | AX-11397476  |
| PRKAG2 | rs6464156   | chr7:151,253,201-151,574,316 | AX-42145019  |
| PRKAG2 | rs1362237   | chr7:151,253,201-151,574,316 | AX-36094381  |
| PRKAG2 | rs870441    | chr7:151,253,201-151,574,316 | AX-11670854  |

|        |             |                              |             |
|--------|-------------|------------------------------|-------------|
| PRKAG2 | rs1419935   | chr7:151,253,201-151,574,316 | AX-11261750 |
| PRKAG2 | rs4725417   | chr7:151,253,201-151,574,316 | AX-36094417 |
| PRKAG2 | rs4726070   | chr7:151,253,201-151,574,316 | AX-11521193 |
| PRKAG2 | rs200736454 | chr7:151,253,201-151,574,316 | AX-83050478 |
| PRKAG2 | rs150248487 | chr7:151,253,201-151,574,316 | AX-90067477 |
| PRKAG2 | rs79780320  | chr7:151,253,201-151,574,316 | AX-36094447 |
| PRKAG2 | rs4726080   | chr7:151,253,201-151,574,316 | AX-36094455 |
| PRKAG2 | rs2254644   | chr7:151,253,201-151,574,316 | AX-11379154 |
| PRKAG2 | rs954482    | chr7:151,253,201-151,574,316 | AX-11693619 |
| PRKAG2 | rs73158145  | chr7:151,253,201-151,574,316 | AX-36094521 |
| PRKAG2 | rs2727540   | chr7:151,253,201-151,574,316 | AX-36094549 |
| PRKAG2 | rs12535248  | chr7:151,253,201-151,574,316 | AX-36094587 |
| PRKAG2 | rs2727553   | chr7:151,253,201-151,574,316 | AX-42145133 |
| PRKAG2 | rs10258842  | chr7:151,253,201-151,574,316 | AX-36094655 |
| PRKAG2 | rs62478181  | chr7:151,253,201-151,574,316 | AX-36094677 |
| PRKAG2 | rs2727551   | chr7:151,253,201-151,574,316 | AX-42145167 |
| PRKAG2 | rs112810819 | chr7:151,253,201-151,574,316 | AX-36094701 |
| PRKAG2 | rs10269789  | chr7:151,253,201-151,574,316 | AX-36094711 |
| PRKAG2 | rs6947064   | chr7:151,253,201-151,574,316 | AX-11596366 |
| PRKAG2 | rs6967507   | chr7:151,253,201-151,574,316 | AX-42145193 |
| PRKAG2 | rs2374270   | chr7:151,253,201-151,574,316 | AX-42145219 |
| PRKAG2 | rs2727563   | chr7:151,253,201-151,574,316 | AX-42145223 |
| PRKAG2 | rs2727562   | chr7:151,253,201-151,574,316 | AX-36094799 |
| PRKAG2 | rs7805747   | chr7:151,253,201-151,574,316 | AX-11646811 |
| PRKAG2 | rs28533208  | chr7:151,253,201-151,574,316 | AX-36094851 |
| PRKAG2 | rs115185349 | chr7:151,253,201-151,574,316 | AX-38397637 |
| PRKAG2 | rs10224002  | chr7:151,253,201-151,574,316 | AX-12385674 |
| PRKAG2 | rs1860743   | chr7:151,253,201-151,574,316 | AX-42145259 |
| PRKAG2 | rs62478183  | chr7:151,253,201-151,574,316 | AX-36094943 |
| PRKAG2 | rs4726086   | chr7:151,253,201-151,574,316 | AX-36094959 |
| PRKAG2 | rs2536069   | chr7:151,253,201-151,574,316 | AX-42145267 |
| PRKAG2 | rs1108722   | chr7:151,253,201-151,574,316 | AX-15612711 |
| PRKAG2 | rs34078741  | chr7:151,253,201-151,574,316 | AX-36095021 |
| PRKAG2 | rs1001116   | chr7:151,253,201-151,574,316 | AX-42145317 |
| PRKAG2 | rs11771445  | chr7:151,253,201-151,574,316 | AX-36095075 |
| PRKAG2 | rs11773668  | chr7:151,253,201-151,574,316 | AX-15612725 |
| PRKAG2 | rs62478188  | chr7:151,253,201-151,574,316 | AX-15612730 |
| PRKAG2 | rs7801616   | chr7:151,253,201-151,574,316 | AX-42145351 |
| PRKAG2 | rs35798852  | chr7:151,253,201-151,574,316 | AX-36095105 |
| PRKAG2 | rs2109782   | chr7:151,253,201-151,574,316 | AX-42145353 |
| PRKAG2 | rs868624    | chr7:151,253,201-151,574,316 | AX-11670689 |
| PRKAG2 | rs7800069   | chr7:151,253,201-151,574,316 | AX-42145369 |
| PRKAG2 | rs3934595   | chr7:151,253,201-151,574,316 | AX-36095173 |
| PRKAG2 | rs6965834   | chr7:151,253,201-151,574,316 | AX-42145379 |
| PRKAG2 | rs4726091   | chr7:151,253,201-151,574,316 | AX-36095205 |
| PRKAG2 | rs4725431   | chr7:151,253,201-151,574,316 | AX-42145381 |
| PRKAG2 | rs4418266   | chr7:151,253,201-151,574,316 | AX-11504871 |
| PRKAG2 | ---         | chr7:151,253,201-151,574,316 | AX-42145397 |
| PRKAG2 | rs9632641   | chr7:151,253,201-151,574,316 | AX-42145401 |
| PRKAG2 | rs6464170   | chr7:151,253,201-151,574,316 | AX-42145407 |
| PRKAG2 | rs4726093   | chr7:151,253,201-151,574,316 | AX-36095237 |
| PRKAG2 | rs12375159  | chr7:151,253,201-151,574,316 | AX-36095243 |
| PRKAG2 | rs78291918  | chr7:151,253,201-151,574,316 | AX-36095245 |
| PRKAG2 | rs12703157  | chr7:151,253,201-151,574,316 | AX-36095257 |
| PRKAG2 | rs62478217  | chr7:151,253,201-151,574,316 | AX-36095259 |

|        |             |                              |             |
|--------|-------------|------------------------------|-------------|
| PRKAG2 | rs6953882   | chr7:151,253,201-151,574,316 | AX-36095265 |
| PRKAG2 | rs6979356   | chr7:151,253,201-151,574,316 | AX-36095283 |
| PRKAG2 | rs12671980  | chr7:151,253,201-151,574,316 | AX-36095285 |
| PRKAG2 | rs4425665   | chr7:151,253,201-151,574,316 | AX-15612771 |
| PRKAG2 | rs7796138   | chr7:151,253,201-151,574,316 | AX-42145417 |
| PRKAG2 | rs11770585  | chr7:151,253,201-151,574,316 | AX-36095325 |
| PRKAG2 | rs34735358  | chr7:151,253,201-151,574,316 | AX-36095327 |
| PRKAG2 | rs79918575  | chr7:151,253,201-151,574,316 | AX-36095345 |
| PRKAG2 | rs7789699   | chr7:151,253,201-151,574,316 | AX-42145419 |
| PRKAG2 | rs56037571  | chr7:151,253,201-151,574,316 | AX-36095359 |
| PRKAG2 | rs11768953  | chr7:151,253,201-151,574,316 | AX-36095377 |
| PRKAG2 | rs58943536  | chr7:151,253,201-151,574,316 | AX-36095379 |
| PRKAG2 | rs4726097   | chr7:151,253,201-151,574,316 | AX-42145427 |
| PRKAG2 | rs56131024  | chr7:151,253,201-151,574,316 | AX-36095403 |
| PRKAG2 | rs34802637  | chr7:151,253,201-151,574,316 | AX-42145437 |
| PRKAG2 | rs58825093  | chr7:151,253,201-151,574,316 | AX-36095419 |
| PRKAG2 | rs10257529  | chr7:151,253,201-151,574,316 | AX-15612789 |
| PRKAG2 | rs12539356  | chr7:151,253,201-151,574,316 | AX-42145455 |
| PRKAG2 | rs62478246  | chr7:151,253,201-151,574,316 | AX-36095455 |
| PRKAG2 | rs4632971   | chr7:151,253,201-151,574,316 | AX-42145465 |
| PRKAG2 | rs10952318  | chr7:151,253,201-151,574,316 | AX-42145469 |
| PRKAG2 | rs56129741  | chr7:151,253,201-151,574,316 | AX-15612812 |
| PRKAG2 | rs6954429   | chr7:151,253,201-151,574,316 | AX-42145471 |
| PRKAG2 | rs34244587  | chr7:151,253,201-151,574,316 | AX-36095491 |
| PRKAG2 | rs34388354  | chr7:151,253,201-151,574,316 | AX-36095503 |
| PRKAG2 | rs1881629   | chr7:151,253,201-151,574,316 | AX-42145489 |
| PRKAG2 | rs13309576  | chr7:151,253,201-151,574,316 | AX-36095523 |
| PRKAG2 | rs13309585  | chr7:151,253,201-151,574,316 | AX-42145493 |
| PRKAG2 | rs75064047  | chr7:151,253,201-151,574,316 | AX-38397717 |
| PRKAG2 | rs75808206  | chr7:151,253,201-151,574,316 | AX-36095565 |
| PRKAG2 | rs11760502  | chr7:151,253,201-151,574,316 | AX-42145529 |
| PRKAG2 | rs56138260  | chr7:151,253,201-151,574,316 | AX-36095629 |
| PRKAG2 | rs1881625   | chr7:151,253,201-151,574,316 | AX-36095673 |
| PRKAG2 | rs13238117  | chr7:151,253,201-151,574,316 | AX-42145541 |
| PRKAG2 | rs74782537  | chr7:151,253,201-151,574,316 | AX-36095677 |
| PRKAG2 | rs56998446  | chr7:151,253,201-151,574,316 | AX-36095701 |
| PRKAG2 | rs79369446  | chr7:151,253,201-151,574,316 | AX-36095713 |
| PRKAG2 | rs57486649  | chr7:151,253,201-151,574,316 | AX-36095767 |
| PRKAG2 | rs62480473  | chr7:151,253,201-151,574,316 | AX-36095769 |
| PRKAG2 | rs73160048  | chr7:151,253,201-151,574,316 | AX-36095797 |
| PRKAG2 | rs7795096   | chr7:151,253,201-151,574,316 | AX-42145583 |
| PRKAG2 | rs7776530   | chr7:151,253,201-151,574,316 | AX-42145587 |
| PRKAG2 | ---         | chr7:151,253,201-151,574,316 | AX-36095889 |
| PRKAG2 | rs13245627  | chr7:151,253,201-151,574,316 | AX-36095905 |
| PRKAG2 | rs7789674   | chr7:151,253,201-151,574,316 | AX-42145615 |
| PRKAG2 | rs34867733  | chr7:151,253,201-151,574,316 | AX-36095961 |
| PRKAG2 | rs9640300   | chr7:151,253,201-151,574,316 | AX-42145623 |
| PRKAG2 | rs56118280  | chr7:151,253,201-151,574,316 | AX-36096007 |
| PRKAG2 | rs12669153  | chr7:151,253,201-151,574,316 | AX-11222050 |
| PRKAG2 | ---         | chr7:151,253,201-151,574,316 | AX-42145637 |
| PRKAG2 | rs78881925  | chr7:151,253,201-151,574,316 | AX-36096073 |
| PRKAG2 | rs77902041  | chr7:151,253,201-151,574,316 | AX-36096081 |
| PRKAG2 | rs116605521 | chr7:151,253,201-151,574,316 | AX-38397741 |
| PRKAG2 | rs66628686  | chr7:151,253,201-151,574,316 | AX-36096083 |
| PSEN1  | rs1800844   | chr14:73,603,143-73,690,399  | AX-12821669 |

|       |             |                             |              |
|-------|-------------|-----------------------------|--------------|
| PSEN1 | rs214279    | chr14:73,603,143-73,690,399 | AX-156280258 |
| PSEN1 | rs214279    | chr14:73,603,143-73,690,399 | AX-156295707 |
| PSEN1 | rs214278    | chr14:73,603,143-73,690,399 | AX-148217977 |
| PSEN1 | rs214278    | chr14:73,603,143-73,690,399 | AX-96781361  |
| PSEN1 | rs190932247 | chr14:73,603,143-73,690,399 | AX-92438212  |
| PSEN1 | rs190932247 | chr14:73,603,143-73,690,399 | AX-92649235  |
| PSEN1 | rs214277    | chr14:73,603,143-73,690,399 | AX-151367651 |
| PSEN1 | rs214277    | chr14:73,603,143-73,690,399 | AX-156271330 |
| PSEN1 | rs35581508  | chr14:73,603,143-73,690,399 | AX-106898197 |
| PSEN1 | rs35581508  | chr14:73,603,143-73,690,399 | AX-156271331 |
| PSEN1 | rs7145968   | chr14:73,603,143-73,690,399 | AX-11630400  |
| PSEN1 | rs3025774   | chr14:73,603,143-73,690,399 | AX-39808003  |
| PSEN1 | rs35891140  | chr14:73,603,143-73,690,399 | AX-156266502 |
| PSEN1 | rs60320273  | chr14:73,603,143-73,690,399 | AX-148566787 |
| PSEN1 | rs60320273  | chr14:73,603,143-73,690,399 | AX-156266503 |
| PSEN1 | rs57815955  | chr14:73,603,143-73,690,399 | AX-156266504 |
| PSEN1 | rs57815955  | chr14:73,603,143-73,690,399 | AX-156286985 |
| PSEN1 | ---         | chr14:73,603,143-73,690,399 | AX-39808013  |
| PSEN1 | rs149562759 | chr14:73,603,143-73,690,399 | AX-86673936  |
| PSEN1 | rs34623110  | chr14:73,603,143-73,690,399 | AX-39808017  |
| PSEN1 | rs214274    | chr14:73,603,143-73,690,399 | AX-151246401 |
| PSEN1 | rs214274    | chr14:73,603,143-73,690,399 | AX-156269305 |
| PSEN1 | rs8018725   | chr14:73,603,143-73,690,399 | AX-11660312  |
| PSEN1 | rs10151436  | chr14:73,603,143-73,690,399 | AX-112924578 |
| PSEN1 | rs10151436  | chr14:73,603,143-73,690,399 | AX-113481262 |
| PSEN1 | rs214273    | chr14:73,603,143-73,690,399 | AX-11370055  |
| PSEN1 | rs115123722 | chr14:73,603,143-73,690,399 | AX-92465313  |
| PSEN1 | rs115123722 | chr14:73,603,143-73,690,399 | AX-92676336  |
| PSEN1 | rs8008686   | chr14:73,603,143-73,690,399 | AX-148472432 |
| PSEN1 | rs8008686   | chr14:73,603,143-73,690,399 | AX-88743101  |
| PSEN1 | rs75266743  | chr14:73,603,143-73,690,399 | AX-12821680  |
| PSEN1 | rs10135273  | chr14:73,603,143-73,690,399 | AX-148784733 |
| PSEN1 | rs10135273  | chr14:73,603,143-73,690,399 | AX-156271332 |
| PSEN1 | rs61986878  | chr14:73,603,143-73,690,399 | AX-92583804  |
| PSEN1 | rs61986878  | chr14:73,603,143-73,690,399 | AX-92794827  |
| PSEN1 | rs116226928 | chr14:73,603,143-73,690,399 | AX-31449041  |
| PSEN1 | rs10136911  | chr14:73,603,143-73,690,399 | AX-105134778 |
| PSEN1 | rs10136911  | chr14:73,603,143-73,690,399 | AX-156271333 |
| PSEN1 | rs10147873  | chr14:73,603,143-73,690,399 | AX-115156262 |
| PSEN1 | rs10147873  | chr14:73,603,143-73,690,399 | AX-156271334 |
| PSEN1 | rs68084031  | chr14:73,603,143-73,690,399 | AX-12821684  |
| PSEN1 | rs67647403  | chr14:73,603,143-73,690,399 | AX-12821686  |
| PSEN1 | rs12883075  | chr14:73,603,143-73,690,399 | AX-31449055  |
| PSEN1 | rs10143704  | chr14:73,603,143-73,690,399 | AX-115156667 |
| PSEN1 | rs10143704  | chr14:73,603,143-73,690,399 | AX-156289852 |
| PSEN1 | rs77119530  | chr14:73,603,143-73,690,399 | AX-123101577 |
| PSEN1 | rs12588591  | chr14:73,603,143-73,690,399 | AX-92511346  |
| PSEN1 | rs12588591  | chr14:73,603,143-73,690,399 | AX-92722369  |
| PSEN1 | rs12878362  | chr14:73,603,143-73,690,399 | AX-148430459 |
| PSEN1 | rs12878362  | chr14:73,603,143-73,690,399 | AX-156266505 |
| PSEN1 | rs8011335   | chr14:73,603,143-73,690,399 | AX-151292003 |
| PSEN1 | rs8011335   | chr14:73,603,143-73,690,399 | AX-156266506 |
| PSEN1 | rs61986883  | chr14:73,603,143-73,690,399 | AX-51108531  |
| PSEN1 | rs57050244  | chr14:73,603,143-73,690,399 | AX-12821698  |
| PSEN1 | ---         | chr14:73,603,143-73,690,399 | AX-92486697  |

|       |             |                             |              |
|-------|-------------|-----------------------------|--------------|
| PSEN1 | ---         | chr14:73,603,143-73,690,399 | AX-92697720  |
| PSEN1 | rs362350    | chr14:73,603,143-73,690,399 | AX-11475790  |
| PSEN1 | rs139058678 | chr14:73,603,143-73,690,399 | AX-151415461 |
| PSEN1 | rs139058678 | chr14:73,603,143-73,690,399 | AX-156298546 |
| PSEN1 | rs72734455  | chr14:73,603,143-73,690,399 | AX-106919467 |
| PSEN1 | rs214271    | chr14:73,603,143-73,690,399 | AX-92522220  |
| PSEN1 | rs214271    | chr14:73,603,143-73,690,399 | AX-92733243  |
| PSEN1 | rs117170264 | chr14:73,603,143-73,690,399 | AX-12821700  |
| PSEN1 | rs199797974 | chr14:73,603,143-73,690,399 | AX-151395482 |
| PSEN1 | rs199797974 | chr14:73,603,143-73,690,399 | AX-156286279 |
| PSEN1 | rs10564849  | chr14:73,603,143-73,690,399 | AX-121933278 |
| PSEN1 | rs3025780   | chr14:73,603,143-73,690,399 | AX-112995311 |
| PSEN1 | rs61986885  | chr14:73,603,143-73,690,399 | AX-92552820  |
| PSEN1 | rs2283427   | chr14:73,603,143-73,690,399 | AX-115156623 |
| PSEN1 | rs2283427   | chr14:73,603,143-73,690,399 | AX-156266507 |
| PSEN1 | rs73305038  | chr14:73,603,143-73,690,399 | AX-156280259 |
| PSEN1 | rs73305038  | chr14:73,603,143-73,690,399 | AX-156295708 |
| PSEN1 | rs9743635   | chr14:73,603,143-73,690,399 | AX-151299533 |
| PSEN1 | rs9743635   | chr14:73,603,143-73,690,399 | AX-156280260 |
| PSEN1 | rs140189461 | chr14:73,603,143-73,690,399 | AX-94369263  |
| PSEN1 | rs63749824  | chr14:73,603,143-73,690,399 | AX-88796133  |
| PSEN1 | rs63749967  | chr14:73,603,143-73,690,399 | AX-88753095  |
| PSEN1 | ---         | chr14:73,603,143-73,690,399 | AX-90043987  |
| PSEN1 | rs63750307  | chr14:73,603,143-73,690,399 | AX-94380496  |
| PSEN1 | rs63750599  | chr14:73,603,143-73,690,399 | AX-88753117  |
| PSEN1 | rs63750815  | chr14:73,603,143-73,690,399 | AX-88753123  |
| PSEN1 | rs63751141  | chr14:73,603,143-73,690,399 | AX-88753143  |
| PSEN1 | rs146855665 | chr14:73,603,143-73,690,399 | AX-94369273  |
| PSEN1 | rs63750831  | chr14:73,603,143-73,690,399 | AX-88753124  |
| PSEN1 | rs63750601  | chr14:73,603,143-73,690,399 | AX-88796163  |
| PSEN1 | ---         | chr14:73,603,143-73,690,399 | AX-90060745  |
| PSEN1 | ---         | chr14:73,603,143-73,690,399 | AX-94360747  |
| PSEN1 | ---         | chr14:73,603,143-73,690,399 | AX-90026709  |
| PSEN1 | rs63750325  | chr14:73,603,143-73,690,399 | AX-90040794  |
| PSEN1 | rs63750321  | chr14:73,603,143-73,690,399 | AX-88753106  |
| PSEN1 | ---         | chr14:73,603,143-73,690,399 | AX-90055595  |
| PSEN1 | rs63751399  | chr14:73,603,143-73,690,399 | AX-90055832  |
| PSEN1 | rs63751475  | chr14:73,603,143-73,690,399 | AX-88817241  |
| PSEN1 | rs362355    | chr14:73,603,143-73,690,399 | AX-39808057  |
| PSEN1 | rs362340    | chr14:73,603,143-73,690,399 | AX-12821706  |
| PSEN1 | rs73305043  | chr14:73,603,143-73,690,399 | AX-156266508 |
| PSEN1 | rs73305043  | chr14:73,603,143-73,690,399 | AX-156286986 |
| PSEN1 | ---         | chr14:73,603,143-73,690,399 | AX-90055596  |
| PSEN1 | rs63750450  | chr14:73,603,143-73,690,399 | AX-88753109  |
| PSEN1 | ---         | chr14:73,603,143-73,690,399 | AX-90055597  |
| PSEN1 | ---         | chr14:73,603,143-73,690,399 | AX-90065758  |
| PSEN1 | rs63749805  | chr14:73,603,143-73,690,399 | AX-90062151  |
| PSEN1 | rs63750800  | chr14:73,603,143-73,690,399 | AX-90040819  |
| PSEN1 | ---         | chr14:73,603,143-73,690,399 | AX-90026714  |
| PSEN1 | ---         | chr14:73,603,143-73,690,399 | AX-90064018  |
| PSEN1 | rs63750378  | chr14:73,603,143-73,690,399 | AX-90069682  |
| PSEN1 | ---         | chr14:73,603,143-73,690,399 | AX-90027871  |
| PSEN1 | rs63750353  | chr14:73,603,143-73,690,399 | AX-88796152  |
| PSEN1 | rs63751278  | chr14:73,603,143-73,690,399 | AX-88753149  |
| PSEN1 | rs41345849  | chr14:73,603,143-73,690,399 | AX-90040770  |

|       |             |                             |              |
|-------|-------------|-----------------------------|--------------|
| PSEN1 | rs63751037  | chr14:73,603,143-73,690,399 | AX-90040834  |
| PSEN1 | rs63751106  | chr14:73,603,143-73,690,399 | AX-90037338  |
| PSEN1 | ---         | chr14:73,603,143-73,690,399 | AX-90034632  |
| PSEN1 | rs63750522  | chr14:73,603,143-73,690,399 | AX-90040801  |
| PSEN1 | ---         | chr14:73,603,143-73,690,399 | AX-90026716  |
| PSEN1 | rs63750322  | chr14:73,603,143-73,690,399 | AX-90069678  |
| PSEN1 | rs63750004  | chr14:73,603,143-73,690,399 | AX-90055602  |
| PSEN1 | rs63751071  | chr14:73,603,143-73,690,399 | AX-88796183  |
| PSEN1 | ---         | chr14:73,603,143-73,690,399 | AX-90026718  |
| PSEN1 | ---         | chr14:73,603,143-73,690,399 | AX-90064764  |
| PSEN1 | ---         | chr14:73,603,143-73,690,399 | AX-90055604  |
| PSEN1 | ---         | chr14:73,603,143-73,690,399 | AX-90064962  |
| PSEN1 | rs63750907  | chr14:73,603,143-73,690,399 | AX-88753129  |
| PSEN1 | rs142093869 | chr14:73,603,143-73,690,399 | AX-94369268  |
| PSEN1 | rs63750588  | chr14:73,603,143-73,690,399 | AX-88796161  |
| PSEN1 | rs63751292  | chr14:73,603,143-73,690,399 | AX-88796195  |
| PSEN1 | ---         | chr14:73,603,143-73,690,399 | AX-90043838  |
| PSEN1 | rs214269    | chr14:73,603,143-73,690,399 | AX-92478882  |
| PSEN1 | rs214269    | chr14:73,603,143-73,690,399 | AX-92689905  |
| PSEN1 | rs362341    | chr14:73,603,143-73,690,399 | AX-12821709  |
| PSEN1 | rs11379162  | chr14:73,603,143-73,690,399 | AX-120527225 |
| PSEN1 | rs362361    | chr14:73,603,143-73,690,399 | AX-12558765  |
| PSEN1 | rs34940341  | chr14:73,603,143-73,690,399 | AX-121876348 |
| PSEN1 | rs34940341  | chr14:73,603,143-73,690,399 | AX-92530382  |
| PSEN1 | rs2333030   | chr14:73,603,143-73,690,399 | AX-39808077  |
| PSEN1 | rs10141217  | chr14:73,603,143-73,690,399 | AX-113020981 |
| PSEN1 | rs10141217  | chr14:73,603,143-73,690,399 | AX-113912260 |
| PSEN1 | rs214267    | chr14:73,603,143-73,690,399 | AX-39808079  |
| PSEN1 | rs12882830  | chr14:73,603,143-73,690,399 | AX-12821714  |
| PSEN1 | rs12587333  | chr14:73,603,143-73,690,399 | AX-113020982 |
| PSEN1 | rs12587333  | chr14:73,603,143-73,690,399 | AX-92519056  |
| PSEN1 | rs4899458   | chr14:73,603,143-73,690,399 | AX-31449101  |
| PSEN1 | rs61986889  | chr14:73,603,143-73,690,399 | AX-92521857  |
| PSEN1 | rs61986889  | chr14:73,603,143-73,690,399 | AX-92732880  |
| PSEN1 | rs214263    | chr14:73,603,143-73,690,399 | AX-151251845 |
| PSEN1 | rs214263    | chr14:73,603,143-73,690,399 | AX-156269306 |
| PSEN1 | rs8011748   | chr14:73,603,143-73,690,399 | AX-92579394  |
| PSEN1 | rs8011748   | chr14:73,603,143-73,690,399 | AX-92790417  |
| PSEN1 | rs12184969  | chr14:73,603,143-73,690,399 | AX-11241475  |
| PSEN1 | rs12184969  | chr14:73,603,143-73,690,399 | AX-156271335 |
| PSEN1 | rs63749885  | chr14:73,603,143-73,690,399 | AX-90069662  |
| PSEN1 | rs63750590  | chr14:73,603,143-73,690,399 | AX-90069695  |
| PSEN1 | rs63751010  | chr14:73,603,143-73,690,399 | AX-88796178  |
| PSEN1 | rs63751484  | chr14:73,603,143-73,690,399 | AX-88796199  |
| PSEN1 | rs63751458  | chr14:73,603,143-73,690,399 | AX-90082365  |
| PSEN1 | ---         | chr14:73,603,143-73,690,399 | AX-90055605  |
| PSEN1 | ---         | chr14:73,603,143-73,690,399 | AX-90060609  |
| PSEN1 | ---         | chr14:73,603,143-73,690,399 | AX-90080645  |
| PSEN1 | rs63750418  | chr14:73,603,143-73,690,399 | AX-88796153  |
| PSEN1 | rs63751210  | chr14:73,603,143-73,690,399 | AX-88753146  |
| PSEN1 | rs63750577  | chr14:73,603,143-73,690,399 | AX-88796160  |
| PSEN1 | rs63750963  | chr14:73,603,143-73,690,399 | AX-88796175  |
| PSEN1 | rs63750299  | chr14:73,603,143-73,690,399 | AX-88753103  |
| PSEN1 | ---         | chr14:73,603,143-73,690,399 | AX-90033399  |
| PSEN1 | rs63751025  | chr14:73,603,143-73,690,399 | AX-88796181  |



|       |             |                             |              |
|-------|-------------|-----------------------------|--------------|
| PSEN1 | rs63750771  | chr14:73,603,143-73,690,399 | AX-90040815  |
| PSEN1 | rs63751068  | chr14:73,603,143-73,690,399 | AX-90069722  |
| PSEN1 | rs61986892  | chr14:73,603,143-73,690,399 | AX-31449117  |
| PSEN1 | rs7152131   | chr14:73,603,143-73,690,399 | AX-39808083  |
| PSEN1 | rs17125457  | chr14:73,603,143-73,690,399 | AX-11308329  |
| PSEN1 | ---         | chr14:73,603,143-73,690,399 | AX-90036186  |
| PSEN1 | rs63750311  | chr14:73,603,143-73,690,399 | AX-88796150  |
| PSEN1 | rs112451138 | chr14:73,603,143-73,690,399 | AX-12821721  |
| PSEN1 | rs63750569  | chr14:73,603,143-73,690,399 | AX-88753114  |
| PSEN1 | ---         | chr14:73,603,143-73,690,399 | AX-90063386  |
| PSEN1 | ---         | chr14:73,603,143-73,690,399 | AX-90026723  |
| PSEN1 | rs63749880  | chr14:73,603,143-73,690,399 | AX-88796136  |
| PSEN1 | ---         | chr14:73,603,143-73,690,399 | AX-90055609  |
| PSEN1 | ---         | chr14:73,603,143-73,690,399 | AX-90055610  |
| PSEN1 | ---         | chr14:73,603,143-73,690,399 | AX-90055611  |
| PSEN1 | ---         | chr14:73,603,143-73,690,399 | AX-90060908  |
| PSEN1 | rs63751309  | chr14:73,603,143-73,690,399 | AX-88796196  |
| PSEN1 | rs63751003  | chr14:73,603,143-73,690,399 | AX-88753132  |
| PSEN1 | rs267606983 | chr14:73,603,143-73,690,399 | AX-90055612  |
| PSEN1 | rs63750444  | chr14:73,603,143-73,690,399 | AX-90069684  |
| PSEN1 | rs140064975 | chr14:73,603,143-73,690,399 | AX-94352511  |
| PSEN1 | rs63749987  | chr14:73,603,143-73,690,399 | AX-88753097  |
| PSEN1 | rs63750761  | chr14:73,603,143-73,690,399 | AX-88753120  |
| PSEN1 | rs63750009  | chr14:73,603,143-73,690,399 | AX-88753098  |
| PSEN1 | rs63751072  | chr14:73,603,143-73,690,399 | AX-88753139  |
| PSEN1 | ---         | chr14:73,603,143-73,690,399 | AX-90026728  |
| PSEN1 | rs63750487  | chr14:73,603,143-73,690,399 | AX-90040800  |
| PSEN1 | rs63749961  | chr14:73,603,143-73,690,399 | AX-88796139  |
| PSEN1 | rs63749970  | chr14:73,603,143-73,690,399 | AX-88753096  |
| PSEN1 | rs63749836  | chr14:73,603,143-73,690,399 | AX-88753090  |
| PSEN1 | rs63750799  | chr14:73,603,143-73,690,399 | AX-90069704  |
| PSEN1 | ---         | chr14:73,603,143-73,690,399 | AX-90026729  |
| PSEN1 | ---         | chr14:73,603,143-73,690,399 | AX-90062779  |
| PSEN1 | rs63751024  | chr14:73,603,143-73,690,399 | AX-88753135  |
| PSEN1 | ---         | chr14:73,603,143-73,690,399 | AX-90033264  |
| PSEN1 | rs63751130  | chr14:73,603,143-73,690,399 | AX-88796186  |
| PSEN1 | rs63749835  | chr14:73,603,143-73,690,399 | AX-88753089  |
| PSEN1 | ---         | chr14:73,603,143-73,690,399 | AX-90026730  |
| PSEN1 | rs63750858  | chr14:73,603,143-73,690,399 | AX-90036675  |
| PSEN1 | ---         | chr14:73,603,143-73,690,399 | AX-90026731  |
| PSEN1 | ---         | chr14:73,603,143-73,690,399 | AX-90050298  |
| PSEN1 | rs63750888  | chr14:73,603,143-73,690,399 | AX-88753127  |
| PSEN1 | rs63750526  | chr14:73,603,143-73,690,399 | AX-88796156  |
| PSEN1 | rs63750634  | chr14:73,603,143-73,690,399 | AX-88796164  |
| PSEN1 | rs63751163  | chr14:73,603,143-73,690,399 | AX-88753145  |
| PSEN1 | ---         | chr14:73,603,143-73,690,399 | AX-90026733  |
| PSEN1 | rs63751320  | chr14:73,603,143-73,690,399 | AX-88796197  |
| PSEN1 | rs112560505 | chr14:73,603,143-73,690,399 | AX-148795365 |
| PSEN1 | rs112560505 | chr14:73,603,143-73,690,399 | AX-156269307 |
| PSEN1 | rs17408630  | chr14:73,603,143-73,690,399 | AX-115156484 |
| PSEN1 | rs17408630  | chr14:73,603,143-73,690,399 | AX-156286987 |
| PSEN1 | rs142355580 | chr14:73,603,143-73,690,399 | AX-156285483 |
| PSEN1 | rs214262    | chr14:73,603,143-73,690,399 | AX-92416399  |
| PSEN1 | rs214262    | chr14:73,603,143-73,690,399 | AX-92627422  |
| PSEN1 | rs12587473  | chr14:73,603,143-73,690,399 | AX-148730168 |

|       |             |                             |              |
|-------|-------------|-----------------------------|--------------|
| PSEN1 | rs12587473  | chr14:73,603,143-73,690,399 | AX-156266509 |
| PSEN1 | rs214261    | chr14:73,603,143-73,690,399 | AX-12821723  |
| PSEN1 | rs214260    | chr14:73,603,143-73,690,399 | AX-39808093  |
| PSEN1 | rs362342    | chr14:73,603,143-73,690,399 | AX-39808095  |
| PSEN1 | rs150191750 | chr14:73,603,143-73,690,399 | AX-156284626 |
| PSEN1 | rs8018739   | chr14:73,603,143-73,690,399 | AX-123030501 |
| PSEN1 | rs115702167 | chr14:73,603,143-73,690,399 | AX-148738516 |
| PSEN1 | rs115702167 | chr14:73,603,143-73,690,399 | AX-156278497 |
| PSEN1 | rs17125555  | chr14:73,603,143-73,690,399 | AX-31449137  |
| PSEN1 | rs63751420  | chr14:73,603,143-73,690,399 | AX-88796198  |
| PSEN1 | rs63750964  | chr14:73,603,143-73,690,399 | AX-88796176  |
| PSEN1 | ---         | chr14:73,603,143-73,690,399 | AX-90062829  |
| PSEN1 | ---         | chr14:73,603,143-73,690,399 | AX-90063445  |
| PSEN1 | rs63750543  | chr14:73,603,143-73,690,399 | AX-88796157  |
| PSEN1 | rs63751102  | chr14:73,603,143-73,690,399 | AX-88796185  |
| PSEN1 | rs63750301  | chr14:73,603,143-73,690,399 | AX-88796149  |
| PSEN1 | rs121917807 | chr14:73,603,143-73,690,399 | AX-88753519  |
| PSEN1 | rs63751229  | chr14:73,603,143-73,690,399 | AX-88753147  |
| PSEN1 | rs63750779  | chr14:73,603,143-73,690,399 | AX-88796167  |
| PSEN1 | rs63750900  | chr14:73,603,143-73,690,399 | AX-88796173  |
| PSEN1 | rs63750886  | chr14:73,603,143-73,690,399 | AX-88796171  |
| PSEN1 | rs63750772  | chr14:73,603,143-73,690,399 | AX-88796166  |
| PSEN1 | rs63750284  | chr14:73,603,143-73,690,399 | AX-88753101  |
| PSEN1 | ---         | chr14:73,603,143-73,690,399 | AX-90055619  |
| PSEN1 | ---         | chr14:73,603,143-73,690,399 | AX-90055834  |
| PSEN1 | rs63750524  | chr14:73,603,143-73,690,399 | AX-88796155  |
| PSEN1 | ---         | chr14:73,603,143-73,690,399 | AX-90026735  |
| PSEN1 | rs114378630 | chr14:73,603,143-73,690,399 | AX-62213841  |
| PSEN1 | rs63749937  | chr14:73,603,143-73,690,399 | AX-88796138  |
| PSEN1 | ---         | chr14:73,603,143-73,690,399 | AX-90029271  |
| PSEN1 | rs63750050  | chr14:73,603,143-73,690,399 | AX-88796144  |
| PSEN1 | rs63750324  | chr14:73,603,143-73,690,399 | AX-90040793  |
| PSEN1 | rs63750863  | chr14:73,603,143-73,690,399 | AX-88796170  |
| PSEN1 | rs63751139  | chr14:73,603,143-73,690,399 | AX-88753142  |
| PSEN1 | ---         | chr14:73,603,143-73,690,399 | AX-90026737  |
| PSEN1 | rs165932    | chr14:73,603,143-73,690,399 | AX-39808101  |
| PSEN1 | rs165933    | chr14:73,603,143-73,690,399 | AX-12471965  |
| PSEN1 | rs362367    | chr14:73,603,143-73,690,399 | AX-12821726  |
| PSEN1 | rs140164309 | chr14:73,603,143-73,690,399 | AX-156269308 |
| PSEN1 | rs140164309 | chr14:73,603,143-73,690,399 | AX-98060526  |
| PSEN1 | rs56008848  | chr14:73,603,143-73,690,399 | AX-113238926 |
| PSEN1 | rs56008848  | chr14:73,603,143-73,690,399 | AX-156286988 |
| PSEN1 | rs142868766 | chr14:73,603,143-73,690,399 | AX-88790803  |
| PSEN1 | rs142868766 | chr14:73,603,143-73,690,399 | AX-92710437  |
| PSEN1 | rs13379148  | chr14:73,603,143-73,690,399 | AX-115156479 |
| PSEN1 | rs13379148  | chr14:73,603,143-73,690,399 | AX-156286989 |
| PSEN1 | rs12587379  | chr14:73,603,143-73,690,399 | AX-31449157  |
| PSEN1 | rs362372    | chr14:73,603,143-73,690,399 | AX-156280261 |
| PSEN1 | rs362372    | chr14:73,603,143-73,690,399 | AX-156295709 |
| PSEN1 | rs12894420  | chr14:73,603,143-73,690,399 | AX-11577798  |
| PSEN1 | rs12894420  | chr14:73,603,143-73,690,399 | AX-119793877 |
| PSEN1 | rs59341951  | chr14:73,603,143-73,690,399 | AX-148156158 |
| PSEN1 | rs59341951  | chr14:73,603,143-73,690,399 | AX-97912420  |
| PSEN1 | rs165934    | chr14:73,603,143-73,690,399 | AX-11280485  |
| PSEN1 | ---         | chr14:73,603,143-73,690,399 | AX-90060341  |

|       |             |                             |              |
|-------|-------------|-----------------------------|--------------|
| PSEN1 | rs63750298  | chr14:73,603,143-73,690,399 | AX-88753102  |
| PSEN1 | rs147638016 | chr14:73,603,143-73,690,399 | AX-94369274  |
| PSEN1 | rs17125721  | chr14:73,603,143-73,690,399 | AX-11308351  |
| PSEN1 | rs362374    | chr14:73,603,143-73,690,399 | AX-39808115  |
| PSEN1 | rs73305064  | chr14:73,603,143-73,690,399 | AX-12821730  |
| PSEN1 | rs61986901  | chr14:73,603,143-73,690,399 | AX-12821731  |
| PSEN1 | rs28607501  | chr14:73,603,143-73,690,399 | AX-92495505  |
| PSEN1 | rs28607501  | chr14:73,603,143-73,690,399 | AX-92706528  |
| PSEN1 | rs2280791   | chr14:73,603,143-73,690,399 | AX-31449167  |
| PSEN1 | rs28532025  | chr14:73,603,143-73,690,399 | AX-148789816 |
| PSEN1 | rs28532025  | chr14:73,603,143-73,690,399 | AX-156266510 |
| PSEN1 | rs12896793  | chr14:73,603,143-73,690,399 | AX-156286990 |
| PSEN1 | rs177415    | chr14:73,603,143-73,690,399 | AX-39808123  |
| PSEN1 | rs362377    | chr14:73,603,143-73,690,399 | AX-92545757  |
| PSEN1 | rs362377    | chr14:73,603,143-73,690,399 | AX-92756780  |
| PSEN1 | rs121917809 | chr14:73,603,143-73,690,399 | AX-86616242  |
| PSEN1 | rs138871096 | chr14:73,603,143-73,690,399 | AX-94352509  |
| PSEN1 | rs63750762  | chr14:73,603,143-73,690,399 | AX-90053477  |
| PSEN1 | rs149299753 | chr14:73,603,143-73,690,399 | AX-94352526  |
| PSEN1 | rs63751164  | chr14:73,603,143-73,690,399 | AX-84769307  |
| PSEN1 | rs143683769 | chr14:73,603,143-73,690,399 | AX-94352519  |
| PSEN1 | rs63751174  | chr14:73,603,143-73,690,399 | AX-83494347  |
| PSEN1 | rs63750941  | chr14:73,603,143-73,690,399 | AX-84690260  |
| PSEN1 | rs141822345 | chr14:73,603,143-73,690,399 | AX-94352517  |
| PSEN1 | ---         | chr14:73,603,143-73,690,399 | AX-90035352  |
| PSEN1 | rs28660183  | chr14:73,603,143-73,690,399 | AX-92415532  |
| PSEN1 | rs28660183  | chr14:73,603,143-73,690,399 | AX-92626555  |
| PSEN1 | rs362343    | chr14:73,603,143-73,690,399 | AX-12821740  |
| PSEN1 | rs10146467  | chr14:73,603,143-73,690,399 | AX-88735361  |
| PSEN1 | rs10146467  | chr14:73,603,143-73,690,399 | AX-92584248  |
| PSEN1 | rs10146743  | chr14:73,603,143-73,690,399 | AX-92542443  |
| PSEN1 | rs10146743  | chr14:73,603,143-73,690,399 | AX-92753466  |
| PSEN1 | rs10140990  | chr14:73,603,143-73,690,399 | AX-12821746  |
| PSEN1 | rs177413    | chr14:73,603,143-73,690,399 | AX-92494005  |
| PSEN1 | rs177413    | chr14:73,603,143-73,690,399 | AX-92705028  |
| PSEN1 | rs2272585   | chr14:73,603,143-73,690,399 | AX-12821748  |
| PSEN1 | rs63751051  | chr14:73,603,143-73,690,399 | AX-88796182  |
| PSEN1 | ---         | chr14:73,603,143-73,690,399 | AX-90055623  |
| PSEN1 | rs63750687  | chr14:73,603,143-73,690,399 | AX-84755534  |
| PSEN1 | rs63750646  | chr14:73,603,143-73,690,399 | AX-84786922  |
| PSEN1 | rs63749860  | chr14:73,603,143-73,690,399 | AX-84695010  |
| PSEN1 | rs63750883  | chr14:73,603,143-73,690,399 | AX-84729339  |
| PSEN1 | rs63751066  | chr14:73,603,143-73,690,399 | AX-84668611  |
| PSEN1 | rs63751416  | chr14:73,603,143-73,690,399 | AX-84766193  |
| PSEN1 | rs63750929  | chr14:73,603,143-73,690,399 | AX-84783734  |
| PSEN1 | rs146648448 | chr14:73,603,143-73,690,399 | AX-94380498  |
| PSEN1 | rs63751254  | chr14:73,603,143-73,690,399 | AX-84678589  |
| PSEN1 | rs63750227  | chr14:73,603,143-73,690,399 | AX-84778436  |
| PSEN1 | rs661       | chr14:73,603,143-73,690,399 | AX-84788645  |
| PSEN1 | ---         | chr14:73,603,143-73,690,399 | AX-90029001  |
| PSEN1 | rs7147079   | chr14:73,603,143-73,690,399 | AX-92477405  |
| PSEN1 | rs7147079   | chr14:73,603,143-73,690,399 | AX-92688428  |
| PSEN1 | rs63751316  | chr14:73,603,143-73,690,399 | AX-84687900  |
| PSEN1 | rs63750802  | chr14:73,603,143-73,690,399 | AX-84787856  |
| PSEN1 | ---         | chr14:73,603,143-73,690,399 | AX-90055624  |

|       |             |                              |              |
|-------|-------------|------------------------------|--------------|
| PSEN1 | ---         | chr14:73,603,143-73,690,399  | AX-90034533  |
| PSEN1 | rs63751223  | chr14:73,603,143-73,690,399  | AX-84768237  |
| PSEN1 | ---         | chr14:73,603,143-73,690,399  | AX-90055626  |
| PSEN1 | rs63750001  | chr14:73,603,143-73,690,399  | AX-84777429  |
| PSEN1 | rs63749925  | chr14:73,603,143-73,690,399  | AX-84749733  |
| PSEN1 | rs121917808 | chr14:73,603,143-73,690,399  | AX-88753008  |
| PSEN1 | rs63750249  | chr14:73,603,143-73,690,399  | AX-84771644  |
| PSEN1 | ---         | chr14:73,603,143-73,690,399  | AX-90026742  |
| PSEN1 | ---         | chr14:73,603,143-73,690,399  | AX-90079627  |
| PSEN1 | rs63750470  | chr14:73,603,143-73,690,399  | AX-94363748  |
| PSEN1 | rs140169796 | chr14:73,603,143-73,690,399  | AX-94369262  |
| PSEN1 | rs362385    | chr14:73,603,143-73,690,399  | AX-11475791  |
| PSEN1 | rs7523      | chr14:73,603,143-73,690,399  | AX-11627422  |
| PSEN1 | rs165935    | chr14:73,603,143-73,690,399  | AX-39808145  |
| PSEN1 | rs362393    | chr14:73,603,143-73,690,399  | AX-92431910  |
| PSEN1 | rs362393    | chr14:73,603,143-73,690,399  | AX-92642933  |
| PSEN1 | rs362344    | chr14:73,603,143-73,690,399  | AX-12821756  |
| PSEN2 | rs6660082   | chr1:227,058,273-227,083,804 | AX-156270755 |
| PSEN2 | rs6660082   | chr1:227,058,273-227,083,804 | AX-156289482 |
| PSEN2 | rs1295645   | chr1:227,058,273-227,083,804 | AX-39373591  |
| PSEN2 | rs1296171   | chr1:227,058,273-227,083,804 | AX-30651861  |
| PSEN2 | rs1295646   | chr1:227,058,273-227,083,804 | AX-30651865  |
| PSEN2 | rs1297990   | chr1:227,058,273-227,083,804 | AX-39373599  |
| PSEN2 | rs7523790   | chr1:227,058,273-227,083,804 | AX-156270756 |
| PSEN2 | rs7523790   | chr1:227,058,273-227,083,804 | AX-156289483 |
| PSEN2 | rs1295647   | chr1:227,058,273-227,083,804 | AX-148018378 |
| PSEN2 | rs1295647   | chr1:227,058,273-227,083,804 | AX-92416116  |
| PSEN2 | rs1295648   | chr1:227,058,273-227,083,804 | AX-148438298 |
| PSEN2 | rs4653469   | chr1:227,058,273-227,083,804 | AX-39373603  |
| PSEN2 | rs11588886  | chr1:227,058,273-227,083,804 | AX-30651879  |
| PSEN2 | rs7522645   | chr1:227,058,273-227,083,804 | AX-30651881  |
| PSEN2 | rs1295621   | chr1:227,058,273-227,083,804 | AX-30651883  |
| PSEN2 | rs6661000   | chr1:227,058,273-227,083,804 | AX-39373605  |
| PSEN2 | rs2793461   | chr1:227,058,273-227,083,804 | AX-11410735  |
| PSEN2 | rs6675452   | chr1:227,058,273-227,083,804 | AX-30651893  |
| PSEN2 | rs6678839   | chr1:227,058,273-227,083,804 | AX-30651897  |
| PSEN2 | rs6678940   | chr1:227,058,273-227,083,804 | AX-39373607  |
| PSEN2 | rs6671059   | chr1:227,058,273-227,083,804 | AX-16912096  |
| PSEN2 | rs12760155  | chr1:227,058,273-227,083,804 | AX-156270757 |
| PSEN2 | rs2073488   | chr1:227,058,273-227,083,804 | AX-156270758 |
| PSEN2 | rs7961      | chr1:227,058,273-227,083,804 | AX-39373611  |
| PSEN2 | rs2793462   | chr1:227,058,273-227,083,804 | AX-156270759 |
| PSEN2 | rs2793462   | chr1:227,058,273-227,083,804 | AX-156289486 |
| PSEN2 | rs2073489   | chr1:227,058,273-227,083,804 | AX-16912099  |
| PSEN2 | rs78557397  | chr1:227,058,273-227,083,804 | AX-30651915  |
| PSEN2 | rs76766807  | chr1:227,058,273-227,083,804 | AX-30651917  |
| PSEN2 | rs139498276 | chr1:227,058,273-227,083,804 | AX-151428473 |
| PSEN2 | rs139498276 | chr1:227,058,273-227,083,804 | AX-156286408 |
| PSEN2 | rs7525819   | chr1:227,058,273-227,083,804 | AX-39373617  |
| PSEN2 | rs732479    | chr1:227,058,273-227,083,804 | AX-39373619  |
| PSEN2 | rs17391089  | chr1:227,058,273-227,083,804 | AX-39373623  |
| PSEN2 | rs6677801   | chr1:227,058,273-227,083,804 | AX-156279962 |
| PSEN2 | rs6677801   | chr1:227,058,273-227,083,804 | AX-156295511 |
| PSEN2 | rs6677908   | chr1:227,058,273-227,083,804 | AX-148519587 |
| PSEN2 | rs6677908   | chr1:227,058,273-227,083,804 | AX-156279963 |

|       |             |                              |              |
|-------|-------------|------------------------------|--------------|
| PSEN2 | rs111567390 | chr1:227,058,273-227,083,804 | AX-30651951  |
| PSEN2 | rs79540408  | chr1:227,058,273-227,083,804 | AX-16912120  |
| PSEN2 | rs1295638   | chr1:227,058,273-227,083,804 | AX-115156491 |
| PSEN2 | rs1295638   | chr1:227,058,273-227,083,804 | AX-156289487 |
| PSEN2 | ---         | chr1:227,058,273-227,083,804 | AX-83184160  |
| PSEN2 | rs143061887 | chr1:227,058,273-227,083,804 | AX-94370125  |
| PSEN2 | rs11405     | chr1:227,058,273-227,083,804 | AX-12412739  |
| PSEN2 | rs149354305 | chr1:227,058,273-227,083,804 | AX-94370151  |
| PSEN2 | rs6759      | chr1:227,058,273-227,083,804 | AX-39373635  |
| PSEN2 | rs12071324  | chr1:227,058,273-227,083,804 | AX-30651959  |
| PSEN2 | rs1295640   | chr1:227,058,273-227,083,804 | AX-39373639  |
| PSEN2 | rs1295641   | chr1:227,058,273-227,083,804 | AX-30651967  |
| PSEN2 | rs1295642   | chr1:227,058,273-227,083,804 | AX-30651975  |
| PSEN2 | rs1295643   | chr1:227,058,273-227,083,804 | AX-30651979  |
| PSEN2 | rs1295644   | chr1:227,058,273-227,083,804 | AX-30651981  |
| PSEN2 | rs58973334  | chr1:227,058,273-227,083,804 | AX-83424521  |
| PSEN2 | rs63750048  | chr1:227,058,273-227,083,804 | AX-90041501  |
| PSEN2 | rs1046240   | chr1:227,058,273-227,083,804 | AX-39373641  |
| PSEN2 | rs12057618  | chr1:227,058,273-227,083,804 | AX-156270760 |
| PSEN2 | rs12057618  | chr1:227,058,273-227,083,804 | AX-156289488 |
| PSEN2 | rs35519961  | chr1:227,058,273-227,083,804 | AX-30651991  |
| PSEN2 | rs12747261  | chr1:227,058,273-227,083,804 | AX-30651993  |
| PSEN2 | rs12401969  | chr1:227,058,273-227,083,804 | AX-156270761 |
| PSEN2 | rs1782530   | chr1:227,058,273-227,083,804 | AX-30652001  |
| PSEN2 | rs58855513  | chr1:227,058,273-227,083,804 | AX-30652003  |
| PSEN2 | rs76732250  | chr1:227,058,273-227,083,804 | AX-156270762 |
| PSEN2 | rs76732250  | chr1:227,058,273-227,083,804 | AX-156289490 |
| PSEN2 | rs63750197  | chr1:227,058,273-227,083,804 | AX-83483186  |
| PSEN2 | rs202178897 | chr1:227,058,273-227,083,804 | AX-86552974  |
| PSEN2 | rs63750215  | chr1:227,058,273-227,083,804 | AX-88797837  |
| PSEN2 | rs63750812  | chr1:227,058,273-227,083,804 | AX-94370063  |
| PSEN2 | rs139573101 | chr1:227,058,273-227,083,804 | AX-94370109  |
| PSEN2 | ---         | chr1:227,058,273-227,083,804 | AX-30652011  |
| PSEN2 | rs1794038   | chr1:227,058,273-227,083,804 | AX-148006059 |
| PSEN2 | rs1794038   | chr1:227,058,273-227,083,804 | AX-153818386 |
| PSEN2 | rs199899855 | chr1:227,058,273-227,083,804 | AX-156286456 |
| PSEN2 | rs2236912   | chr1:227,058,273-227,083,804 | AX-119837848 |
| PSEN2 | rs2236912   | chr1:227,058,273-227,083,804 | AX-156289491 |
| PSEN2 | rs12069540  | chr1:227,058,273-227,083,804 | AX-30652019  |
| PSEN2 | rs2236913   | chr1:227,058,273-227,083,804 | AX-39373645  |
| PSEN2 | rs74502648  | chr1:227,058,273-227,083,804 | AX-30652027  |
| PSEN2 | rs2246221   | chr1:227,058,273-227,083,804 | AX-39373653  |
| PSEN2 | ---         | chr1:227,058,273-227,083,804 | AX-90026427  |
| PSEN2 | rs1800680   | chr1:227,058,273-227,083,804 | AX-113897998 |
| PSEN2 | rs1800680   | chr1:227,058,273-227,083,804 | AX-113971836 |
| PSEN2 | rs1800681   | chr1:227,058,273-227,083,804 | AX-39373657  |
| PSEN2 | rs63750880  | chr1:227,058,273-227,083,804 | AX-88754793  |
| PSEN2 | rs61730652  | chr1:227,058,273-227,083,804 | AX-16912152  |
| PSEN2 | rs63749884  | chr1:227,058,273-227,083,804 | AX-88797836  |
| PSEN2 | rs140562931 | chr1:227,058,273-227,083,804 | AX-94370112  |
| PSEN2 | ---         | chr1:227,058,273-227,083,804 | AX-92812211  |
| PSEN2 | rs7539119   | chr1:227,058,273-227,083,804 | AX-30652035  |
| PSEN2 | ---         | chr1:227,058,273-227,083,804 | AX-39373661  |
| PSEN2 | rs150780392 | chr1:227,058,273-227,083,804 | AX-94370164  |
| PSEN2 | rs11804915  | chr1:227,058,273-227,083,804 | AX-156270763 |

|       |             |                              |              |
|-------|-------------|------------------------------|--------------|
| PSEN2 | rs11804915  | chr1:227,058,273-227,083,804 | AX-156289492 |
| PSEN2 | rs6680042   | chr1:227,058,273-227,083,804 | AX-30652051  |
| PSEN2 | rs41309643  | chr1:227,058,273-227,083,804 | AX-50090037  |
| PSEN2 | rs1800678   | chr1:227,058,273-227,083,804 | AX-16912159  |
| PSEN2 | rs2236914   | chr1:227,058,273-227,083,804 | AX-39373665  |
| PSEN2 | ---         | chr1:227,058,273-227,083,804 | AX-39373667  |
| PSEN2 | rs6426553   | chr1:227,058,273-227,083,804 | AX-30652057  |
| PSEN2 | rs565698726 | chr1:227,058,273-227,083,804 | AX-94353366  |
| PSEN2 | rs2236915   | chr1:227,058,273-227,083,804 | AX-39373673  |
| PSEN2 | rs7537037   | chr1:227,058,273-227,083,804 | AX-156270764 |
| PSEN2 | rs7537037   | chr1:227,058,273-227,083,804 | AX-156289493 |
| PSEN2 | rs63750207  | chr1:227,058,273-227,083,804 | AX-94370061  |
| PSEN2 | ---         | chr1:227,058,273-227,083,804 | AX-90029405  |
| PSEN2 | rs12130732  | chr1:227,058,273-227,083,804 | AX-156270765 |
| PSEN2 | rs12130732  | chr1:227,058,273-227,083,804 | AX-156289494 |
| PSEN2 | rs75612539  | chr1:227,058,273-227,083,804 | AX-30652067  |
| PSEN2 | rs12123818  | chr1:227,058,273-227,083,804 | AX-30652071  |
| PSEN2 | rs743601    | chr1:227,058,273-227,083,804 | AX-30652073  |
| PSEN2 | rs743602    | chr1:227,058,273-227,083,804 | AX-30652079  |
| PSEN2 | rs3820649   | chr1:227,058,273-227,083,804 | AX-156270766 |
| PSEN2 | rs3820649   | chr1:227,058,273-227,083,804 | AX-156289495 |
| PSEN2 | rs2855559   | chr1:227,058,273-227,083,804 | AX-156270767 |
| PSEN2 | rs10693643  | chr1:227,058,273-227,083,804 | AX-151363373 |
| PSEN2 | rs10693643  | chr1:227,058,273-227,083,804 | AX-156284386 |
| PSEN2 | rs2105822   | chr1:227,058,273-227,083,804 | AX-30652093  |
| PSEN2 | rs2855560   | chr1:227,058,273-227,083,804 | AX-30652095  |
| PSEN2 | rs3213436   | chr1:227,058,273-227,083,804 | AX-39373679  |
| PSEN2 | rs10753428  | chr1:227,058,273-227,083,804 | AX-112922257 |
| PSEN2 | rs10753428  | chr1:227,058,273-227,083,804 | AX-113961642 |
| PSEN2 | rs145671982 | chr1:227,058,273-227,083,804 | AX-94370138  |
| PSEN2 | rs2855562   | chr1:227,058,273-227,083,804 | AX-30652107  |
| PSEN2 | rs3829979   | chr1:227,058,273-227,083,804 | AX-30652111  |
| PSEN2 | rs2855563   | chr1:227,058,273-227,083,804 | AX-16912173  |
| PSEN2 | rs6426554   | chr1:227,058,273-227,083,804 | AX-39373681  |
| PSEN2 | rs7555739   | chr1:227,058,273-227,083,804 | AX-156279964 |
| PSEN2 | rs7555739   | chr1:227,058,273-227,083,804 | AX-156295512 |
| PSEN2 | rs7512986   | chr1:227,058,273-227,083,804 | AX-156279965 |
| PSEN2 | rs7512986   | chr1:227,058,273-227,083,804 | AX-156295513 |
| PSEN2 | rs4653470   | chr1:227,058,273-227,083,804 | AX-39373687  |
| PSEN2 | rs63750666  | chr1:227,058,273-227,083,804 | AX-86718019  |
| PSEN2 | rs142772982 | chr1:227,058,273-227,083,804 | AX-94353372  |
| PSEN2 | rs201922151 | chr1:227,058,273-227,083,804 | AX-86634258  |
| PSEN2 | rs63750110  | chr1:227,058,273-227,083,804 | AX-86600929  |
| RAF1  | rs1051208   | chr3:12,625,100-12,705,700   | AX-12392606  |
| RAF1  | ---         | chr3:12,625,100-12,705,700   | AX-91984589  |
| RAF1  | rs3729931   | chr3:12,625,100-12,705,700   | AX-11476415  |
| RAF1  | rs397516815 | chr3:12,625,100-12,705,700   | AX-92013606  |
| RAF1  | rs80338798  | chr3:12,625,100-12,705,700   | AX-91994419  |
| RAF1  | ---         | chr3:12,625,100-12,705,700   | AX-91976560  |
| RAF1  | rs2290159   | chr3:12,625,100-12,705,700   | AX-14107485  |
| RAF1  | ---         | chr3:12,625,100-12,705,700   | AX-92022232  |
| RAF1  | ---         | chr3:12,625,100-12,705,700   | AX-91978705  |
| RAF1  | rs2290161   | chr3:12,625,100-12,705,700   | AX-12524527  |
| RAF1  | rs904464    | chr3:12,625,100-12,705,700   | AX-14107740  |
| RAF1  | rs397516829 | chr3:12,625,100-12,705,700   | AX-92012335  |

|       |             |                               |             |
|-------|-------------|-------------------------------|-------------|
| RAF1  | ---         | chr3:12,625,100-12,705,700    | AX-92000871 |
| RAF1  | ---         | chr3:12,625,100-12,705,700    | AX-91986307 |
| RAF1  | rs80338796  | chr3:12,625,100-12,705,700    | AX-91979703 |
| RAF1  | ---         | chr3:12,625,100-12,705,700    | AX-91988305 |
| RAF1  | ---         | chr3:12,625,100-12,705,700    | AX-94357126 |
| RAF1  | ---         | chr3:12,625,100-12,705,700    | AX-94373877 |
| RAF1  | ---         | chr3:12,625,100-12,705,700    | AX-94378269 |
| RAF1  | rs9817675   | chr3:12,625,100-12,705,700    | AX-12668391 |
| RBM20 | rs7091655   | chr10:112,404,155-112,599,227 | AX-14778949 |
| RBM20 | rs7915361   | chr10:112,404,155-112,599,227 | AX-14778958 |
| RBM20 | rs4488129   | chr10:112,404,155-112,599,227 | AX-29424783 |
| RBM20 | rs72834018  | chr10:112,404,155-112,599,227 | AX-29424803 |
| RBM20 | rs11591881  | chr10:112,404,155-112,599,227 | AX-29424913 |
| RBM20 | rs4918560   | chr10:112,404,155-112,599,227 | AX-29424963 |
| RBM20 | rs112860361 | chr10:112,404,155-112,599,227 | AX-29424967 |
| RBM20 | rs75379819  | chr10:112,404,155-112,599,227 | AX-29425003 |
| RBM20 | rs957307    | chr10:112,404,155-112,599,227 | AX-38717999 |
| RBM20 | rs10885025  | chr10:112,404,155-112,599,227 | AX-12399700 |
| RBM20 | rs4342957   | chr10:112,404,155-112,599,227 | AX-11501892 |
| RBM20 | rs10749049  | chr10:112,404,155-112,599,227 | AX-11118570 |
| RBM20 | rs12764660  | chr10:112,404,155-112,599,227 | AX-11226301 |
| RBM20 | rs11195294  | chr10:112,404,155-112,599,227 | AX-38718083 |
| RBM20 | rs118030849 | chr10:112,404,155-112,599,227 | AX-29425117 |
| RBM20 | rs10885030  | chr10:112,404,155-112,599,227 | AX-29425119 |
| RBM20 | rs71481106  | chr10:112,404,155-112,599,227 | AX-14781397 |
| RBM20 | rs1113798   | chr10:112,404,155-112,599,227 | AX-29425155 |
| RBM20 | rs1885790   | chr10:112,404,155-112,599,227 | AX-14781840 |
| RBM20 | rs117234122 | chr10:112,404,155-112,599,227 | AX-29425201 |
| RBM20 | rs34376649  | chr10:112,404,155-112,599,227 | AX-29425203 |
| RBM20 | rs72823883  | chr10:112,404,155-112,599,227 | AX-29425231 |
| RBM20 | rs7069694   | chr10:112,404,155-112,599,227 | AX-11604699 |
| RBM20 | rs2181407   | chr10:112,404,155-112,599,227 | AX-11373061 |
| RBM20 | rs536357058 | chr10:112,404,155-112,599,227 | AX-90034716 |
| RBM20 | rs61735268  | chr10:112,404,155-112,599,227 | AX-14782494 |
| RBM20 | rs201148126 | chr10:112,404,155-112,599,227 | AX-83594630 |
| RBM20 | rs61862866  | chr10:112,404,155-112,599,227 | AX-29425287 |
| RBM20 | rs12254016  | chr10:112,404,155-112,599,227 | AX-14782520 |
| RBM20 | rs61735272  | chr10:112,404,155-112,599,227 | AX-83310107 |
| RBM20 | rs6585012   | chr10:112,404,155-112,599,227 | AX-11573698 |
| RBM20 | rs55873340  | chr10:112,404,155-112,599,227 | AX-29425297 |
| RBM20 | rs189569984 | chr10:112,404,155-112,599,227 | AX-83176076 |
| RBM20 | rs11818323  | chr10:112,404,155-112,599,227 | AX-38718221 |
| RBM20 | rs1570427   | chr10:112,404,155-112,599,227 | AX-11276640 |
| RBM20 | rs12357780  | chr10:112,404,155-112,599,227 | AX-38718233 |
| RBM20 | rs55909737  | chr10:112,404,155-112,599,227 | AX-29425341 |
| RBM20 | rs76048624  | chr10:112,404,155-112,599,227 | AX-14782838 |
| RBM20 | rs183007628 | chr10:112,404,155-112,599,227 | AX-90067624 |
| RBM20 | rs74853168  | chr10:112,404,155-112,599,227 | AX-14782848 |
| RBM20 | rs117325635 | chr10:112,404,155-112,599,227 | AX-14782869 |
| RBM20 | rs12354559  | chr10:112,404,155-112,599,227 | AX-11201955 |
| RBM20 | rs12781566  | chr10:112,404,155-112,599,227 | AX-38718267 |
| RBM20 | rs11195329  | chr10:112,404,155-112,599,227 | AX-11150012 |
| RBM20 | rs11195330  | chr10:112,404,155-112,599,227 | AX-11150013 |
| RBM20 | rs59523266  | chr10:112,404,155-112,599,227 | AX-29425369 |
| RBM20 | rs75497793  | chr10:112,404,155-112,599,227 | AX-29425373 |

|       |             |                               |             |
|-------|-------------|-------------------------------|-------------|
| RBM20 | rs2031130   | chr10:112,404,155-112,599,227 | AX-11361290 |
| RBM20 | rs2146546   | chr10:112,404,155-112,599,227 | AX-29425377 |
| RBM20 | rs6585015   | chr10:112,404,155-112,599,227 | AX-11573699 |
| RBM20 | rs34038942  | chr10:112,404,155-112,599,227 | AX-29425409 |
| RBM20 | rs10885051  | chr10:112,404,155-112,599,227 | AX-29425415 |
| RBM20 | ---         | chr10:112,404,155-112,599,227 | AX-90026445 |
| RBM20 | rs267607001 | chr10:112,404,155-112,599,227 | AX-90055331 |
| RBM20 | ---         | chr10:112,404,155-112,599,227 | AX-90059778 |
| RBM20 | ---         | chr10:112,404,155-112,599,227 | AX-90055332 |
| RBM20 | rs267607004 | chr10:112,404,155-112,599,227 | AX-90055333 |
| RBM20 | rs267607005 | chr10:112,404,155-112,599,227 | AX-90026449 |
| RBM20 | rs267607003 | chr10:112,404,155-112,599,227 | AX-90026450 |
| RBM20 | rs74339620  | chr10:112,404,155-112,599,227 | AX-14783130 |
| RBM20 | rs375798246 | chr10:112,404,155-112,599,227 | AX-86647071 |
| RBM20 | rs61862917  | chr10:112,404,155-112,599,227 | AX-29425423 |
| RBM20 | rs61862919  | chr10:112,404,155-112,599,227 | AX-29425431 |
| RBM20 | rs10749053  | chr10:112,404,155-112,599,227 | AX-38718307 |
| RBM20 | rs201370621 | chr10:112,404,155-112,599,227 | AX-86645675 |
| RBM20 | ---         | chr10:112,404,155-112,599,227 | AX-90061254 |
| RBM20 | rs75858380  | chr10:112,404,155-112,599,227 | AX-14783283 |
| RBM20 | ---         | chr10:112,404,155-112,599,227 | AX-90033769 |
| RBM20 | rs116908219 | chr10:112,404,155-112,599,227 | AX-83398500 |
| RBM20 | rs12354578  | chr10:112,404,155-112,599,227 | AX-11201956 |
| RBM20 | rs61862943  | chr10:112,404,155-112,599,227 | AX-14783391 |
| RBM20 | rs74158134  | chr10:112,404,155-112,599,227 | AX-14783444 |
| RBM20 | rs17831429  | chr10:112,404,155-112,599,227 | AX-38718331 |
| RBM20 | rs10885054  | chr10:112,404,155-112,599,227 | AX-38718333 |
| RBM20 | rs4525160   | chr10:112,404,155-112,599,227 | AX-29425519 |
| RBM20 | rs17831542  | chr10:112,404,155-112,599,227 | AX-38718339 |
| RBM20 | rs11195346  | chr10:112,404,155-112,599,227 | AX-29425523 |
| RBM20 | rs17764171  | chr10:112,404,155-112,599,227 | AX-29425533 |
| RBM20 | ---         | chr10:112,404,155-112,599,227 | AX-90027815 |
| RBM20 | rs942077    | chr10:112,404,155-112,599,227 | AX-38718343 |
| RBM20 | rs77555440  | chr10:112,404,155-112,599,227 | AX-29425537 |
| RBM20 | rs79603535  | chr10:112,404,155-112,599,227 | AX-29425539 |
| RYR2  | rs1406413   | chr1:237,205,702-237,997,288  | AX-11260561 |
| RYR2  | rs74146692  | chr1:237,205,702-237,997,288  | AX-16948625 |
| RYR2  | rs78437107  | chr1:237,205,702-237,997,288  | AX-16948628 |
| RYR2  | rs4659488   | chr1:237,205,702-237,997,288  | AX-39410433 |
| RYR2  | rs10925301  | chr1:237,205,702-237,997,288  | AX-11132003 |
| RYR2  | rs10754590  | chr1:237,205,702-237,997,288  | AX-30722127 |
| RYR2  | rs72764017  | chr1:237,205,702-237,997,288  | AX-16948638 |
| RYR2  | rs74467938  | chr1:237,205,702-237,997,288  | AX-16948641 |
| RYR2  | rs12129023  | chr1:237,205,702-237,997,288  | AX-16948647 |
| RYR2  | rs9428372   | chr1:237,205,702-237,997,288  | AX-16948666 |
| RYR2  | rs114831995 | chr1:237,205,702-237,997,288  | AX-16948667 |
| RYR2  | rs12037993  | chr1:237,205,702-237,997,288  | AX-11187572 |
| RYR2  | rs12022498  | chr1:237,205,702-237,997,288  | AX-30722191 |
| RYR2  | rs75606339  | chr1:237,205,702-237,997,288  | AX-30722193 |
| RYR2  | rs76090957  | chr1:237,205,702-237,997,288  | AX-16948681 |
| RYR2  | rs78117705  | chr1:237,205,702-237,997,288  | AX-16948695 |
| RYR2  | rs59173404  | chr1:237,205,702-237,997,288  | AX-30722211 |
| RYR2  | rs9428374   | chr1:237,205,702-237,997,288  | AX-11687027 |
| RYR2  | rs10802587  | chr1:237,205,702-237,997,288  | AX-11122972 |
| RYR2  | rs12118388  | chr1:237,205,702-237,997,288  | AX-30722221 |



|      |             |                              |             |
|------|-------------|------------------------------|-------------|
| RYR2 | rs72764032  | chr1:237,205,702-237,997,288 | AX-30722233 |
| RYR2 | rs12733526  | chr1:237,205,702-237,997,288 | AX-30722243 |
| RYR2 | rs74892437  | chr1:237,205,702-237,997,288 | AX-37446009 |
| RYR2 | rs6428991   | chr1:237,205,702-237,997,288 | AX-30722257 |
| RYR2 | rs7529190   | chr1:237,205,702-237,997,288 | AX-39410545 |
| RYR2 | rs7551672   | chr1:237,205,702-237,997,288 | AX-11629226 |
| RYR2 | rs7554607   | chr1:237,205,702-237,997,288 | AX-11629395 |
| RYR2 | rs12736282  | chr1:237,205,702-237,997,288 | AX-30722309 |
| RYR2 | rs2039689   | chr1:237,205,702-237,997,288 | AX-30722311 |
| RYR2 | rs2490346   | chr1:237,205,702-237,997,288 | AX-30722313 |
| RYR2 | rs1415714   | chr1:237,205,702-237,997,288 | AX-11261409 |
| RYR2 | rs75079782  | chr1:237,205,702-237,997,288 | AX-16948756 |
| RYR2 | rs2485598   | chr1:237,205,702-237,997,288 | AX-11394474 |
| RYR2 | rs11583937  | chr1:237,205,702-237,997,288 | AX-11160306 |
| RYR2 | rs9287218   | chr1:237,205,702-237,997,288 | AX-16948760 |
| RYR2 | rs12130378  | chr1:237,205,702-237,997,288 | AX-16948761 |
| RYR2 | rs77980124  | chr1:237,205,702-237,997,288 | AX-30722363 |
| RYR2 | rs114604390 | chr1:237,205,702-237,997,288 | AX-16948773 |
| RYR2 | rs2485567   | chr1:237,205,702-237,997,288 | AX-11394468 |
| RYR2 | rs2485569   | chr1:237,205,702-237,997,288 | AX-30722377 |
| RYR2 | rs6693720   | chr1:237,205,702-237,997,288 | AX-39410603 |
| RYR2 | rs2485572   | chr1:237,205,702-237,997,288 | AX-30722393 |
| RYR2 | rs115060574 | chr1:237,205,702-237,997,288 | AX-37446033 |
| RYR2 | rs2490380   | chr1:237,205,702-237,997,288 | AX-30722399 |
| RYR2 | rs12139096  | chr1:237,205,702-237,997,288 | AX-30722419 |
| RYR2 | rs12142661  | chr1:237,205,702-237,997,288 | AX-11192756 |
| RYR2 | rs6670388   | chr1:237,205,702-237,997,288 | AX-30722451 |
| RYR2 | rs1361115   | chr1:237,205,702-237,997,288 | AX-16948837 |
| RYR2 | rs1415716   | chr1:237,205,702-237,997,288 | AX-11261410 |
| RYR2 | rs75317377  | chr1:237,205,702-237,997,288 | AX-30722527 |
| RYR2 | rs57868848  | chr1:237,205,702-237,997,288 | AX-16948850 |
| RYR2 | rs114411755 | chr1:237,205,702-237,997,288 | AX-30722561 |
| RYR2 | rs2490356   | chr1:237,205,702-237,997,288 | AX-16948862 |
| RYR2 | rs17671324  | chr1:237,205,702-237,997,288 | AX-11334324 |
| RYR2 | rs77928911  | chr1:237,205,702-237,997,288 | AX-30722589 |
| RYR2 | rs6680857   | chr1:237,205,702-237,997,288 | AX-16948894 |
| RYR2 | rs61832394  | chr1:237,205,702-237,997,288 | AX-30722591 |
| RYR2 | rs78538843  | chr1:237,205,702-237,997,288 | AX-16948929 |
| RYR2 | rs78578141  | chr1:237,205,702-237,997,288 | AX-16948930 |
| RYR2 | rs12724105  | chr1:237,205,702-237,997,288 | AX-30722613 |
| RYR2 | rs683787    | chr1:237,205,702-237,997,288 | AX-30722631 |
| RYR2 | rs587020    | chr1:237,205,702-237,997,288 | AX-30722647 |
| RYR2 | rs10158020  | chr1:237,205,702-237,997,288 | AX-30722667 |
| RYR2 | rs115909403 | chr1:237,205,702-237,997,288 | AX-16948949 |
| RYR2 | rs78500791  | chr1:237,205,702-237,997,288 | AX-30722687 |
| RYR2 | rs2152884   | chr1:237,205,702-237,997,288 | AX-11370830 |
| RYR2 | rs115659895 | chr1:237,205,702-237,997,288 | AX-94348732 |
| RYR2 | rs17626494  | chr1:237,205,702-237,997,288 | AX-11331939 |
| RYR2 | rs12353981  | chr1:237,205,702-237,997,288 | AX-11201936 |
| RYR2 | rs61832416  | chr1:237,205,702-237,997,288 | AX-30722727 |
| RYR2 | rs12407646  | chr1:237,205,702-237,997,288 | AX-16948979 |
| RYR2 | rs72764081  | chr1:237,205,702-237,997,288 | AX-30722753 |
| RYR2 | rs11587851  | chr1:237,205,702-237,997,288 | AX-12414075 |
| RYR2 | rs652792    | chr1:237,205,702-237,997,288 | AX-11569788 |
| RYR2 | rs6663668   | chr1:237,205,702-237,997,288 | AX-11576953 |

|      |             |                              |             |
|------|-------------|------------------------------|-------------|
| RYR2 | rs581693    | chr1:237,205,702-237,997,288 | AX-30722779 |
| RYR2 | rs75804850  | chr1:237,205,702-237,997,288 | AX-16949017 |
| RYR2 | rs114721952 | chr1:237,205,702-237,997,288 | AX-30722791 |
| RYR2 | rs268779    | chr1:237,205,702-237,997,288 | AX-11405086 |
| RYR2 | rs10925349  | chr1:237,205,702-237,997,288 | AX-11132006 |
| RYR2 | rs585717    | chr1:237,205,702-237,997,288 | AX-30722807 |
| RYR2 | rs11810170  | chr1:237,205,702-237,997,288 | AX-12420083 |
| RYR2 | rs75678262  | chr1:237,205,702-237,997,288 | AX-30722819 |
| RYR2 | rs16835048  | chr1:237,205,702-237,997,288 | AX-12473158 |
| RYR2 | ---         | chr1:237,205,702-237,997,288 | AX-11576960 |
| RYR2 | rs10925354  | chr1:237,205,702-237,997,288 | AX-16949057 |
| RYR2 | rs72764090  | chr1:237,205,702-237,997,288 | AX-30722829 |
| RYR2 | rs17627448  | chr1:237,205,702-237,997,288 | AX-39410851 |
| RYR2 | rs10495392  | chr1:237,205,702-237,997,288 | AX-39410853 |
| RYR2 | rs10495394  | chr1:237,205,702-237,997,288 | AX-11111147 |
| RYR2 | rs4659491   | chr1:237,205,702-237,997,288 | AX-39410873 |
| RYR2 | rs7519473   | chr1:237,205,702-237,997,288 | AX-11627182 |
| RYR2 | rs61832457  | chr1:237,205,702-237,997,288 | AX-30722861 |
| RYR2 | rs76592404  | chr1:237,205,702-237,997,288 | AX-63949296 |
| RYR2 | rs7537963   | chr1:237,205,702-237,997,288 | AX-12631370 |
| RYR2 | rs2860125   | chr1:237,205,702-237,997,288 | AX-30722899 |
| RYR2 | rs6686679   | chr1:237,205,702-237,997,288 | AX-30722903 |
| RYR2 | rs10802597  | chr1:237,205,702-237,997,288 | AX-11122973 |
| RYR2 | rs12024815  | chr1:237,205,702-237,997,288 | AX-50104262 |
| RYR2 | rs116207040 | chr1:237,205,702-237,997,288 | AX-37446109 |
| RYR2 | rs10754597  | chr1:237,205,702-237,997,288 | AX-39410927 |
| RYR2 | rs6682878   | chr1:237,205,702-237,997,288 | AX-30722961 |
| RYR2 | rs12164577  | chr1:237,205,702-237,997,288 | AX-30722977 |
| RYR2 | rs12741336  | chr1:237,205,702-237,997,288 | AX-39410951 |
| RYR2 | rs2543036   | chr1:237,205,702-237,997,288 | AX-16949159 |
| RYR2 | rs12755424  | chr1:237,205,702-237,997,288 | AX-11225945 |
| RYR2 | rs72765924  | chr1:237,205,702-237,997,288 | AX-16949168 |
| RYR2 | rs35588486  | chr1:237,205,702-237,997,288 | AX-39410969 |
| RYR2 | rs74659606  | chr1:237,205,702-237,997,288 | AX-16949177 |
| RYR2 | rs75894029  | chr1:237,205,702-237,997,288 | AX-16949178 |
| RYR2 | rs116553681 | chr1:237,205,702-237,997,288 | AX-16949181 |
| RYR2 | rs974893    | chr1:237,205,702-237,997,288 | AX-12667329 |
| RYR2 | rs7535911   | chr1:237,205,702-237,997,288 | AX-11628216 |
| RYR2 | rs73127292  | chr1:237,205,702-237,997,288 | AX-16949200 |
| RYR2 | rs16835142  | chr1:237,205,702-237,997,288 | AX-39410973 |
| RYR2 | ---         | chr1:237,205,702-237,997,288 | AX-94371235 |
| RYR2 | rs6429005   | chr1:237,205,702-237,997,288 | AX-11563406 |
| RYR2 | rs10925374  | chr1:237,205,702-237,997,288 | AX-11132008 |
| RYR2 | rs80065345  | chr1:237,205,702-237,997,288 | AX-16949235 |
| RYR2 | rs77704048  | chr1:237,205,702-237,997,288 | AX-16949239 |
| RYR2 | rs12026757  | chr1:237,205,702-237,997,288 | AX-30723117 |
| RYR2 | rs4475735   | chr1:237,205,702-237,997,288 | AX-11507162 |
| RYR2 | rs17681893  | chr1:237,205,702-237,997,288 | AX-57110260 |
| RYR2 | rs77936709  | chr1:237,205,702-237,997,288 | AX-37446159 |
| RYR2 | rs79510842  | chr1:237,205,702-237,997,288 | AX-16949285 |
| RYR2 | ---         | chr1:237,205,702-237,997,288 | AX-94373953 |
| RYR2 | rs397516539 | chr1:237,205,702-237,997,288 | AX-91986469 |
| RYR2 | ---         | chr1:237,205,702-237,997,288 | AX-94371236 |
| RYR2 | rs201211033 | chr1:237,205,702-237,997,288 | AX-86548883 |
| RYR2 | ---         | chr1:237,205,702-237,997,288 | AX-94354487 |

|      |             |                              |             |
|------|-------------|------------------------------|-------------|
| RYR2 | rs72765933  | chr1:237,205,702-237,997,288 | AX-30723191 |
| RYR2 | rs10925394  | chr1:237,205,702-237,997,288 | AX-11132011 |
| RYR2 | rs17682073  | chr1:237,205,702-237,997,288 | AX-11334873 |
| RYR2 | rs4659786   | chr1:237,205,702-237,997,288 | AX-11515874 |
| RYR2 | ---         | chr1:237,205,702-237,997,288 | AX-94373954 |
| RYR2 | ---         | chr1:237,205,702-237,997,288 | AX-94371238 |
| RYR2 | ---         | chr1:237,205,702-237,997,288 | AX-94371239 |
| RYR2 | rs79447782  | chr1:237,205,702-237,997,288 | AX-30723207 |
| RYR2 | rs12078819  | chr1:237,205,702-237,997,288 | AX-11189498 |
| RYR2 | rs74147258  | chr1:237,205,702-237,997,288 | AX-16949328 |
| RYR2 | rs4659787   | chr1:237,205,702-237,997,288 | AX-11515875 |
| RYR2 | rs56369530  | chr1:237,205,702-237,997,288 | AX-30723221 |
| RYR2 | rs115179216 | chr1:237,205,702-237,997,288 | AX-30723227 |
| RYR2 | rs114119896 | chr1:237,205,702-237,997,288 | AX-37446173 |
| RYR2 | rs12569314  | chr1:237,205,702-237,997,288 | AX-16949344 |
| RYR2 | rs35968847  | chr1:237,205,702-237,997,288 | AX-11472907 |
| RYR2 | rs4659792   | chr1:237,205,702-237,997,288 | AX-16949372 |
| RYR2 | rs13376665  | chr1:237,205,702-237,997,288 | AX-11251495 |
| RYR2 | rs12691536  | chr1:237,205,702-237,997,288 | AX-12445672 |
| RYR2 | rs72765955  | chr1:237,205,702-237,997,288 | AX-30723299 |
| RYR2 | rs6673187   | chr1:237,205,702-237,997,288 | AX-16949384 |
| RYR2 | ---         | chr1:237,205,702-237,997,288 | AX-94354490 |
| RYR2 | ---         | chr1:237,205,702-237,997,288 | AX-94354491 |
| RYR2 | rs4659794   | chr1:237,205,702-237,997,288 | AX-12576860 |
| RYR2 | rs7532079   | chr1:237,205,702-237,997,288 | AX-57110375 |
| RYR2 | rs12122723  | chr1:237,205,702-237,997,288 | AX-16949405 |
| RYR2 | rs7552945   | chr1:237,205,702-237,997,288 | AX-12631819 |
| RYR2 | rs60811417  | chr1:237,205,702-237,997,288 | AX-16949418 |
| RYR2 | rs10925414  | chr1:237,205,702-237,997,288 | AX-11132013 |
| RYR2 | rs17633019  | chr1:237,205,702-237,997,288 | AX-11332264 |
| RYR2 | rs11803630  | chr1:237,205,702-237,997,288 | AX-11176607 |
| RYR2 | rs12139603  | chr1:237,205,702-237,997,288 | AX-11192564 |
| RYR2 | ---         | chr1:237,205,702-237,997,288 | AX-94354492 |
| RYR2 | ---         | chr1:237,205,702-237,997,288 | AX-11189786 |
| RYR2 | ---         | chr1:237,205,702-237,997,288 | AX-94357205 |
| RYR2 | ---         | chr1:237,205,702-237,997,288 | AX-94354493 |
| RYR2 | ---         | chr1:237,205,702-237,997,288 | AX-92791863 |
| RYR2 | ---         | chr1:237,205,702-237,997,288 | AX-94373956 |
| RYR2 | ---         | chr1:237,205,702-237,997,288 | AX-94371244 |
| RYR2 | ---         | chr1:237,205,702-237,997,288 | AX-94373957 |
| RYR2 | rs190140598 | chr1:237,205,702-237,997,288 | AX-90068425 |
| RYR2 | ---         | chr1:237,205,702-237,997,288 | AX-94354495 |
| RYR2 | rs73106477  | chr1:237,205,702-237,997,288 | AX-16949454 |
| RYR2 | rs76313299  | chr1:237,205,702-237,997,288 | AX-16949458 |
| RYR2 | rs121918602 | chr1:237,205,702-237,997,288 | AX-88754919 |
| RYR2 | rs3765097   | chr1:237,205,702-237,997,288 | AX-12560432 |
| RYR2 | rs376612295 | chr1:237,205,702-237,997,288 | AX-86658630 |
| RYR2 | rs78281932  | chr1:237,205,702-237,997,288 | AX-16949477 |
| RYR2 | rs1478912   | chr1:237,205,702-237,997,288 | AX-39411251 |
| RYR2 | rs2618679   | chr1:237,205,702-237,997,288 | AX-16949500 |
| RYR2 | rs73108485  | chr1:237,205,702-237,997,288 | AX-16949505 |
| RYR2 | rs35662567  | chr1:237,205,702-237,997,288 | AX-16949511 |
| RYR2 | ---         | chr1:237,205,702-237,997,288 | AX-94354496 |
| RYR2 | rs10925430  | chr1:237,205,702-237,997,288 | AX-16949534 |
| RYR2 | rs16835294  | chr1:237,205,702-237,997,288 | AX-11282247 |

|      |             |                              |             |
|------|-------------|------------------------------|-------------|
| RYR2 | rs12734456  | chr1:237,205,702-237,997,288 | AX-11225237 |
| RYR2 | rs6429021   | chr1:237,205,702-237,997,288 | AX-11563408 |
| RYR2 | rs75504890  | chr1:237,205,702-237,997,288 | AX-16949561 |
| RYR2 | rs8179365   | chr1:237,205,702-237,997,288 | AX-11667538 |
| RYR2 | rs2618683   | chr1:237,205,702-237,997,288 | AX-11401672 |
| RYR2 | rs80127105  | chr1:237,205,702-237,997,288 | AX-16949567 |
| RYR2 | rs111305036 | chr1:237,205,702-237,997,288 | AX-16949568 |
| RYR2 | rs12142897  | chr1:237,205,702-237,997,288 | AX-11192768 |
| RYR2 | rs1982645   | chr1:237,205,702-237,997,288 | AX-30723503 |
| RYR2 | rs6673954   | chr1:237,205,702-237,997,288 | AX-11577576 |
| RYR2 | rs2927936   | chr1:237,205,702-237,997,288 | AX-16949574 |
| RYR2 | rs72549414  | chr1:237,205,702-237,997,288 | AX-30723529 |
| RYR2 | ---         | chr1:237,205,702-237,997,288 | AX-94371247 |
| RYR2 | rs202040519 | chr1:237,205,702-237,997,288 | AX-83245266 |
| RYR2 | rs2255277   | chr1:237,205,702-237,997,288 | AX-16949590 |
| RYR2 | rs116098815 | chr1:237,205,702-237,997,288 | AX-16949594 |
| RYR2 | ---         | chr1:237,205,702-237,997,288 | AX-94371248 |
| RYR2 | rs2805425   | chr1:237,205,702-237,997,288 | AX-11411414 |
| RYR2 | rs61833803  | chr1:237,205,702-237,997,288 | AX-16949628 |
| RYR2 | rs79700489  | chr1:237,205,702-237,997,288 | AX-16949637 |
| RYR2 | rs2618687   | chr1:237,205,702-237,997,288 | AX-11401673 |
| RYR2 | rs75411491  | chr1:237,205,702-237,997,288 | AX-16949650 |
| RYR2 | rs10925439  | chr1:237,205,702-237,997,288 | AX-39411379 |
| RYR2 | rs2805432   | chr1:237,205,702-237,997,288 | AX-30723663 |
| RYR2 | rs116523878 | chr1:237,205,702-237,997,288 | AX-16949667 |
| RYR2 | rs10925446  | chr1:237,205,702-237,997,288 | AX-16949668 |
| RYR2 | rs2805446   | chr1:237,205,702-237,997,288 | AX-11411417 |
| RYR2 | rs12145423  | chr1:237,205,702-237,997,288 | AX-16949687 |
| RYR2 | rs2618674   | chr1:237,205,702-237,997,288 | AX-11401671 |
| RYR2 | rs115264366 | chr1:237,205,702-237,997,288 | AX-16949688 |
| RYR2 | rs2779378   | chr1:237,205,702-237,997,288 | AX-30723797 |
| RYR2 | ---         | chr1:237,205,702-237,997,288 | AX-16949700 |
| RYR2 | rs2253273   | chr1:237,205,702-237,997,288 | AX-11379018 |
| RYR2 | rs149514924 | chr1:237,205,702-237,997,288 | AX-83500522 |
| RYR2 | ---         | chr1:237,205,702-237,997,288 | AX-94362576 |
| RYR2 | rs113050511 | chr1:237,205,702-237,997,288 | AX-16949721 |
| RYR2 | rs115108564 | chr1:237,205,702-237,997,288 | AX-16949724 |
| RYR2 | rs2061840   | chr1:237,205,702-237,997,288 | AX-11364355 |
| RYR2 | rs71642898  | chr1:237,205,702-237,997,288 | AX-30723865 |
| RYR2 | rs2805473   | chr1:237,205,702-237,997,288 | AX-16949737 |
| RYR2 | rs2805389   | chr1:237,205,702-237,997,288 | AX-11411411 |
| RYR2 | rs3766865   | chr1:237,205,702-237,997,288 | AX-11479113 |
| RYR2 | rs201312753 | chr1:237,205,702-237,997,288 | AX-83338573 |
| RYR2 | rs200525962 | chr1:237,205,702-237,997,288 | AX-83443903 |
| RYR2 | rs116125917 | chr1:237,205,702-237,997,288 | AX-16949753 |
| RYR2 | rs12740534  | chr1:237,205,702-237,997,288 | AX-11225424 |
| RYR2 | rs2805399   | chr1:237,205,702-237,997,288 | AX-30723935 |
| RYR2 | rs12131976  | chr1:237,205,702-237,997,288 | AX-30723965 |
| RYR2 | rs10754613  | chr1:237,205,702-237,997,288 | AX-30723985 |
| RYR2 | rs1842085   | chr1:237,205,702-237,997,288 | AX-12507379 |
| RYR2 | rs79060382  | chr1:237,205,702-237,997,288 | AX-50645106 |
| RYR2 | rs2805411   | chr1:237,205,702-237,997,288 | AX-16949822 |
| RYR2 | rs56229512  | chr1:237,205,702-237,997,288 | AX-30724071 |
| RYR2 | rs2805413   | chr1:237,205,702-237,997,288 | AX-30724087 |
| RYR2 | rs115978575 | chr1:237,205,702-237,997,288 | AX-30724091 |

|      |             |                              |             |
|------|-------------|------------------------------|-------------|
| RYR2 | rs1074189   | chr1:237,205,702-237,997,288 | AX-16949844 |
| RYR2 | rs791543    | chr1:237,205,702-237,997,288 | AX-11653508 |
| RYR2 | rs2779348   | chr1:237,205,702-237,997,288 | AX-11410068 |
| RYR2 | rs13374055  | chr1:237,205,702-237,997,288 | AX-16949861 |
| RYR2 | rs13376031  | chr1:237,205,702-237,997,288 | AX-11251466 |
| RYR2 | rs1717783   | chr1:237,205,702-237,997,288 | AX-11312552 |
| RYR2 | rs10925473  | chr1:237,205,702-237,997,288 | AX-11132020 |
| RYR2 | rs116450377 | chr1:237,205,702-237,997,288 | AX-16949868 |
| RYR2 | rs79811945  | chr1:237,205,702-237,997,288 | AX-16949870 |
| RYR2 | rs12121663  | chr1:237,205,702-237,997,288 | AX-11191299 |
| RYR2 | rs116123906 | chr1:237,205,702-237,997,288 | AX-37446279 |
| RYR2 | ---         | chr1:237,205,702-237,997,288 | AX-90036812 |
| RYR2 | ---         | chr1:237,205,702-237,997,288 | AX-94371249 |
| RYR2 | rs3820216   | chr1:237,205,702-237,997,288 | AX-39411623 |
| RYR2 | ---         | chr1:237,205,702-237,997,288 | AX-94371250 |
| RYR2 | rs41315858  | chr1:237,205,702-237,997,288 | AX-11494611 |
| RYR2 | rs3766871   | chr1:237,205,702-237,997,288 | AX-11479114 |
| RYR2 | rs596502    | chr1:237,205,702-237,997,288 | AX-11552990 |
| RYR2 | rs111695681 | chr1:237,205,702-237,997,288 | AX-37446283 |
| RYR2 | rs72751219  | chr1:237,205,702-237,997,288 | AX-16949891 |
| RYR2 | rs115362592 | chr1:237,205,702-237,997,288 | AX-30724179 |
| RYR2 | rs571026    | chr1:237,205,702-237,997,288 | AX-11545731 |
| RYR2 | rs7531957   | chr1:237,205,702-237,997,288 | AX-11627961 |
| RYR2 | rs615869    | chr1:237,205,702-237,997,288 | AX-12597326 |
| RYR2 | rs186906598 | chr1:237,205,702-237,997,288 | AX-82945126 |
| RYR2 | ---         | chr1:237,205,702-237,997,288 | AX-94354501 |
| RYR2 | ---         | chr1:237,205,702-237,997,288 | AX-94379327 |
| RYR2 | rs1759119   | chr1:237,205,702-237,997,288 | AX-16949909 |
| RYR2 | rs116234420 | chr1:237,205,702-237,997,288 | AX-16949912 |
| RYR2 | rs12563366  | chr1:237,205,702-237,997,288 | AX-11215013 |
| RYR2 | ---         | chr1:237,205,702-237,997,288 | AX-94362578 |
| RYR2 | ---         | chr1:237,205,702-237,997,288 | AX-94371252 |
| RYR2 | ---         | chr1:237,205,702-237,997,288 | AX-94354503 |
| RYR2 | rs7526807   | chr1:237,205,702-237,997,288 | AX-11627635 |
| RYR2 | rs121918597 | chr1:237,205,702-237,997,288 | AX-94353341 |
| RYR2 | ---         | chr1:237,205,702-237,997,288 | AX-94379329 |
| RYR2 | rs80315247  | chr1:237,205,702-237,997,288 | AX-16949924 |
| RYR2 | ---         | chr1:237,205,702-237,997,288 | AX-90028550 |
| RYR2 | rs707189    | chr1:237,205,702-237,997,288 | AX-39411679 |
| RYR2 | ---         | chr1:237,205,702-237,997,288 | AX-94379330 |
| RYR2 | ---         | chr1:237,205,702-237,997,288 | AX-94354505 |
| RYR2 | ---         | chr1:237,205,702-237,997,288 | AX-94379331 |
| RYR2 | ---         | chr1:237,205,702-237,997,288 | AX-94379332 |
| RYR2 | ---         | chr1:237,205,702-237,997,288 | AX-94379333 |
| RYR2 | rs121918603 | chr1:237,205,702-237,997,288 | AX-94370097 |
| RYR2 | ---         | chr1:237,205,702-237,997,288 | AX-94362584 |
| RYR2 | ---         | chr1:237,205,702-237,997,288 | AX-86727416 |
| RYR2 | ---         | chr1:237,205,702-237,997,288 | AX-90058302 |
| RYR2 | ---         | chr1:237,205,702-237,997,288 | AX-94354506 |
| RYR2 | ---         | chr1:237,205,702-237,997,288 | AX-94371257 |
| RYR2 | ---         | chr1:237,205,702-237,997,288 | AX-94380104 |
| RYR2 | ---         | chr1:237,205,702-237,997,288 | AX-94371258 |
| RYR2 | ---         | chr1:237,205,702-237,997,288 | AX-94354509 |
| RYR2 | rs1342835   | chr1:237,205,702-237,997,288 | AX-12458446 |
| RYR2 | rs11583033  | chr1:237,205,702-237,997,288 | AX-39411709 |

|      |             |                              |             |
|------|-------------|------------------------------|-------------|
| RYR2 | rs80107454  | chr1:237,205,702-237,997,288 | AX-16949944 |
| RYR2 | rs72549416  | chr1:237,205,702-237,997,288 | AX-30724263 |
| RYR2 | rs121918598 | chr1:237,205,702-237,997,288 | AX-94353342 |
| RYR2 | ---         | chr1:237,205,702-237,997,288 | AX-94379335 |
| RYR2 | rs374191985 | chr1:237,205,702-237,997,288 | AX-86672405 |
| RYR2 | ---         | chr1:237,205,702-237,997,288 | AX-86561291 |
| RYR2 | rs80252757  | chr1:237,205,702-237,997,288 | AX-30724267 |
| RYR2 | rs684923    | chr1:237,205,702-237,997,288 | AX-16949957 |
| RYR2 | rs1402803   | chr1:237,205,702-237,997,288 | AX-11260267 |
| RYR2 | rs559344    | chr1:237,205,702-237,997,288 | AX-11545028 |
| RYR2 | rs677730    | chr1:237,205,702-237,997,288 | AX-11584642 |
| RYR2 | rs10925490  | chr1:237,205,702-237,997,288 | AX-11132023 |
| RYR2 | rs56090696  | chr1:237,205,702-237,997,288 | AX-30724313 |
| RYR2 | rs2012813   | chr1:237,205,702-237,997,288 | AX-16950000 |
| RYR2 | ---         | chr1:237,205,702-237,997,288 | AX-86550584 |
| RYR2 | rs34967813  | chr1:237,205,702-237,997,288 | AX-11456067 |
| RYR2 | rs12121446  | chr1:237,205,702-237,997,288 | AX-30724345 |
| RYR2 | rs950625    | chr1:237,205,702-237,997,288 | AX-11690594 |
| RYR2 | rs111448231 | chr1:237,205,702-237,997,288 | AX-16950025 |
| RYR2 | rs12032174  | chr1:237,205,702-237,997,288 | AX-39411769 |
| RYR2 | rs2461315   | chr1:237,205,702-237,997,288 | AX-16950065 |
| RYR2 | rs12754190  | chr1:237,205,702-237,997,288 | AX-30724425 |
| RYR2 | rs2797436   | chr1:237,205,702-237,997,288 | AX-39411779 |
| RYR2 | rs12125625  | chr1:237,205,702-237,997,288 | AX-11191581 |
| RYR2 | rs2797441   | chr1:237,205,702-237,997,288 | AX-39411805 |
| RYR2 | rs2090876   | chr1:237,205,702-237,997,288 | AX-12517012 |
| RYR2 | rs2819774   | chr1:237,205,702-237,997,288 | AX-11412362 |
| RYR2 | ---         | chr1:237,205,702-237,997,288 | AX-94356249 |
| RYR2 | rs2685301   | chr1:237,205,702-237,997,288 | AX-16950139 |
| RYR2 | rs72751297  | chr1:237,205,702-237,997,288 | AX-30724517 |
| RYR2 | rs3905206   | chr1:237,205,702-237,997,288 | AX-16950166 |
| RYR2 | rs2819770   | chr1:237,205,702-237,997,288 | AX-11412361 |
| RYR2 | ---         | chr1:237,205,702-237,997,288 | AX-94373000 |
| RYR2 | ---         | chr1:237,205,702-237,997,288 | AX-94354510 |
| RYR2 | ---         | chr1:237,205,702-237,997,288 | AX-94356251 |
| RYR2 | rs3817436   | chr1:237,205,702-237,997,288 | AX-16950200 |
| RYR2 | rs2253083   | chr1:237,205,702-237,997,288 | AX-16950215 |
| RYR2 | rs74412575  | chr1:237,205,702-237,997,288 | AX-37446347 |
| RYR2 | rs2250049   | chr1:237,205,702-237,997,288 | AX-30724607 |
| RYR2 | rs2249287   | chr1:237,205,702-237,997,288 | AX-16950228 |
| RYR2 | rs57827447  | chr1:237,205,702-237,997,288 | AX-16950234 |
| RYR2 | ---         | chr1:237,205,702-237,997,288 | AX-94356252 |
| RYR2 | ---         | chr1:237,205,702-237,997,288 | AX-94356253 |
| RYR2 | ---         | chr1:237,205,702-237,997,288 | AX-94354511 |
| RYR2 | ---         | chr1:237,205,702-237,997,288 | AX-94371263 |
| RYR2 | ---         | chr1:237,205,702-237,997,288 | AX-94371264 |
| RYR2 | ---         | chr1:237,205,702-237,997,288 | AX-94371265 |
| RYR2 | rs790889    | chr1:237,205,702-237,997,288 | AX-11653134 |
| RYR2 | ---         | chr1:237,205,702-237,997,288 | AX-86622029 |
| RYR2 | ---         | chr1:237,205,702-237,997,288 | AX-94371266 |
| RYR2 | ---         | chr1:237,205,702-237,997,288 | AX-94371267 |
| RYR2 | ---         | chr1:237,205,702-237,997,288 | AX-94354518 |
| RYR2 | ---         | chr1:237,205,702-237,997,288 | AX-94354519 |
| RYR2 | ---         | chr1:237,205,702-237,997,288 | AX-94356254 |
| RYR2 | ---         | chr1:237,205,702-237,997,288 | AX-94371270 |

|      |             |                              |             |
|------|-------------|------------------------------|-------------|
| RYR2 | ---         | chr1:237,205,702-237,997,288 | AX-94371271 |
| RYR2 | ---         | chr1:237,205,702-237,997,288 | AX-94356255 |
| RYR2 | ---         | chr1:237,205,702-237,997,288 | AX-94354522 |
| RYR2 | ---         | chr1:237,205,702-237,997,288 | AX-94371234 |
| RYR2 | ---         | chr1:237,205,702-237,997,288 | AX-94371273 |
| RYR2 | ---         | chr1:237,205,702-237,997,288 | AX-94354524 |
| RYR2 | ---         | chr1:237,205,702-237,997,288 | AX-94373006 |
| RYR2 | ---         | chr1:237,205,702-237,997,288 | AX-94356257 |
| RYR2 | ---         | chr1:237,205,702-237,997,288 | AX-94373008 |
| RYR2 | ---         | chr1:237,205,702-237,997,288 | AX-94354526 |
| RYR2 | ---         | chr1:237,205,702-237,997,288 | AX-94373009 |
| RYR2 | ---         | chr1:237,205,702-237,997,288 | AX-94371277 |
| RYR2 | ---         | chr1:237,205,702-237,997,288 | AX-94371278 |
| RYR2 | ---         | chr1:237,205,702-237,997,288 | AX-94371279 |
| RYR2 | ---         | chr1:237,205,702-237,997,288 | AX-94371280 |
| RYR2 | ---         | chr1:237,205,702-237,997,288 | AX-94356261 |
| RYR2 | ---         | chr1:237,205,702-237,997,288 | AX-94356262 |
| RYR2 | ---         | chr1:237,205,702-237,997,288 | AX-94356263 |
| RYR2 | rs121918605 | chr1:237,205,702-237,997,288 | AX-94370099 |
| RYR2 | ---         | chr1:237,205,702-237,997,288 | AX-94356264 |
| RYR2 | rs200092869 | chr1:237,205,702-237,997,288 | AX-83111656 |
| RYR2 | rs2256242   | chr1:237,205,702-237,997,288 | AX-11379306 |
| RYR2 | rs121918600 | chr1:237,205,702-237,997,288 | AX-94370094 |
| RYR2 | ---         | chr1:237,205,702-237,997,288 | AX-94356265 |
| RYR2 | ---         | chr1:237,205,702-237,997,288 | AX-94356266 |
| RYR2 | rs397516510 | chr1:237,205,702-237,997,288 | AX-91999003 |
| RYR2 | rs114289907 | chr1:237,205,702-237,997,288 | AX-16950274 |
| RYR2 | rs189345192 | chr1:237,205,702-237,997,288 | AX-86636490 |
| RYR2 | ---         | chr1:237,205,702-237,997,288 | AX-94356267 |
| RYR2 | rs117645754 | chr1:237,205,702-237,997,288 | AX-16950278 |
| RYR2 | rs147990209 | chr1:237,205,702-237,997,288 | AX-94350899 |
| RYR2 | ---         | chr1:237,205,702-237,997,288 | AX-94373018 |
| RYR2 | ---         | chr1:237,205,702-237,997,288 | AX-94354532 |
| RYR2 | rs790899    | chr1:237,205,702-237,997,288 | AX-12644252 |
| RYR2 | rs11806850  | chr1:237,205,702-237,997,288 | AX-11176733 |
| RYR2 | rs72753216  | chr1:237,205,702-237,997,288 | AX-30724689 |
| RYR2 | ---         | chr1:237,205,702-237,997,288 | AX-94371283 |
| RYR2 | rs3999765   | chr1:237,205,702-237,997,288 | AX-12565422 |
| RYR2 | rs12043362  | chr1:237,205,702-237,997,288 | AX-11187881 |
| RYR2 | ---         | chr1:237,205,702-237,997,288 | AX-94353348 |
| RYR2 | ---         | chr1:237,205,702-237,997,288 | AX-94380689 |
| RYR2 | ---         | chr1:237,205,702-237,997,288 | AX-92619362 |
| RYR2 | ---         | chr1:237,205,702-237,997,288 | AX-94379337 |
| RYR2 | ---         | chr1:237,205,702-237,997,288 | AX-94379338 |
| RYR2 | ---         | chr1:237,205,702-237,997,288 | AX-94371286 |
| RYR2 | rs2794820   | chr1:237,205,702-237,997,288 | AX-16950301 |
| RYR2 | rs72753233  | chr1:237,205,702-237,997,288 | AX-30724757 |
| RYR2 | ---         | chr1:237,205,702-237,997,288 | AX-90071994 |
| RYR2 | ---         | chr1:237,205,702-237,997,288 | AX-94362589 |
| RYR2 | ---         | chr1:237,205,702-237,997,288 | AX-94354537 |
| RYR2 | rs41267519  | chr1:237,205,702-237,997,288 | AX-11491191 |
| RYR2 | ---         | chr1:237,205,702-237,997,288 | AX-94379340 |
| RYR2 | ---         | chr1:237,205,702-237,997,288 | AX-90026428 |
| RYR2 | ---         | chr1:237,205,702-237,997,288 | AX-94371288 |
| RYR2 | rs75206601  | chr1:237,205,702-237,997,288 | AX-16950321 |

|       |             |                               |              |
|-------|-------------|-------------------------------|--------------|
| RYR2  | rs790886    | chr1:237,205,702-237,997,288  | AX-30724785  |
| RYR2  | rs7550039   | chr1:237,205,702-237,997,288  | AX-11629119  |
| RYR2  | rs80278432  | chr1:237,205,702-237,997,288  | AX-30724793  |
| RYR2  | ---         | chr1:237,205,702-237,997,288  | AX-94379341  |
| RYR2  | ---         | chr1:237,205,702-237,997,288  | AX-94354539  |
| RYR2  | ---         | chr1:237,205,702-237,997,288  | AX-94362592  |
| RYR2  | ---         | chr1:237,205,702-237,997,288  | AX-94379343  |
| RYR2  | ---         | chr1:237,205,702-237,997,288  | AX-94371290  |
| RYR2  | rs121918606 | chr1:237,205,702-237,997,288  | AX-94370100  |
| RYR2  | rs12022376  | chr1:237,205,702-237,997,288  | AX-39412007  |
| RYR2  | rs2794841   | chr1:237,205,702-237,997,288  | AX-39412015  |
| RYR2  | rs2819742   | chr1:237,205,702-237,997,288  | AX-16950352  |
| RYR2  | rs790894    | chr1:237,205,702-237,997,288  | AX-16950354  |
| RYR2  | ---         | chr1:237,205,702-237,997,288  | AX-94362595  |
| RYR2  | rs1891247   | chr1:237,205,702-237,997,288  | AX-16950358  |
| RYR2  | ---         | chr1:237,205,702-237,997,288  | AX-94362596  |
| RYR2  | ---         | chr1:237,205,702-237,997,288  | AX-94354541  |
| RYR2  | ---         | chr1:237,205,702-237,997,288  | AX-94362597  |
| RYR2  | ---         | chr1:237,205,702-237,997,288  | AX-94379348  |
| RYR2  | ---         | chr1:237,205,702-237,997,288  | AX-92445953  |
| RYR2  | ---         | chr1:237,205,702-237,997,288  | AX-94379349  |
| RYR2  | rs12594     | chr1:237,205,702-237,997,288  | AX-11216922  |
| RYR2  | rs11581226  | chr1:237,205,702-237,997,288  | AX-11160133  |
| SCN4B | rs140348243 | chr11:118,004,092-118,023,630 | AX-86672199  |
| SCN4B | rs116888881 | chr11:118,004,092-118,023,630 | AX-16496104  |
| SCN4B | rs45539032  | chr11:118,004,092-118,023,630 | AX-29878797  |
| SCN4B | rs955917    | chr11:118,004,092-118,023,630 | AX-38969193  |
| SCN4B | rs1793137   | chr11:118,004,092-118,023,630 | AX-38969195  |
| SCN4B | rs628299    | chr11:118,004,092-118,023,630 | AX-38969207  |
| SCN4B | rs658624    | chr11:118,004,092-118,023,630 | AX-38969209  |
| SCN4B | rs34913450  | chr11:118,004,092-118,023,630 | AX-29878821  |
| SCN4B | rs586053    | chr11:118,004,092-118,023,630 | AX-38969213  |
| SCN4B | rs12788624  | chr11:118,004,092-118,023,630 | AX-29878831  |
| SCN4B | rs377558816 | chr11:118,004,092-118,023,630 | AX-86603324  |
| SCN5A | rs41315485  | chr3:38,589,553-38,691,164    | AX-34309377  |
| SCN5A | rs200849470 | chr3:38,589,553-38,691,164    | AX-151131242 |
| SCN5A | rs4073797   | chr3:38,589,553-38,691,164    | AX-84741238  |
| SCN5A | rs41310757  | chr3:38,589,553-38,691,164    | AX-11494328  |
| SCN5A | rs7429945   | chr3:38,589,553-38,691,164    | AX-11624566  |
| SCN5A | rs199473640 | chr3:38,589,553-38,691,164    | AX-90029406  |
| SCN5A | ---         | chr3:38,589,553-38,691,164    | AX-90078367  |
| SCN5A | rs45489199  | chr3:38,589,553-38,691,164    | AX-83249005  |
| SCN5A | ---         | chr3:38,589,553-38,691,164    | AX-83312442  |
| SCN5A | rs199473336 | chr3:38,589,553-38,691,164    | AX-90039721  |
| SCN5A | rs199473335 | chr3:38,589,553-38,691,164    | AX-86588823  |
| SCN5A | ---         | chr3:38,589,553-38,691,164    | AX-90030522  |
| SCN5A | rs199473331 | chr3:38,589,553-38,691,164    | AX-86698000  |
| SCN5A | ---         | chr3:38,589,553-38,691,164    | AX-86690052  |
| SCN5A | rs13324293  | chr3:38,589,553-38,691,164    | AX-41228981  |
| SCN5A | rs199473329 | chr3:38,589,553-38,691,164    | AX-90063462  |
| SCN5A | ---         | chr3:38,589,553-38,691,164    | AX-90062404  |
| SCN5A | rs137854603 | chr3:38,589,553-38,691,164    | AX-86666431  |
| SCN5A | ---         | chr3:38,589,553-38,691,164    | AX-86723704  |
| SCN5A | ---         | chr3:38,589,553-38,691,164    | AX-90066196  |
| SCN5A | rs150264233 | chr3:38,589,553-38,691,164    | AX-83535814  |



|       |             |                            |             |
|-------|-------------|----------------------------|-------------|
| SCN5A | ---         | chr3:38,589,553-38,691,164 | AX-90035645 |
| SCN5A | rs45465995  | chr3:38,589,553-38,691,164 | AX-83392212 |
| SCN5A | ---         | chr3:38,589,553-38,691,164 | AX-90076754 |
| SCN5A | ---         | chr3:38,589,553-38,691,164 | AX-90056036 |
| SCN5A | ---         | chr3:38,589,553-38,691,164 | AX-90058888 |
| SCN5A | ---         | chr3:38,589,553-38,691,164 | AX-90056266 |
| SCN5A | ---         | chr3:38,589,553-38,691,164 | AX-90079363 |
| SCN5A | ---         | chr3:38,589,553-38,691,164 | AX-90029371 |
| SCN5A | ---         | chr3:38,589,553-38,691,164 | AX-90059186 |
| SCN5A | rs45563942  | chr3:38,589,553-38,691,164 | AX-83420305 |
| SCN5A | rs199473320 | chr3:38,589,553-38,691,164 | AX-86603768 |
| SCN5A | rs137854610 | chr3:38,589,553-38,691,164 | AX-86639919 |
| SCN5A | ---         | chr3:38,589,553-38,691,164 | AX-90028400 |
| SCN5A | ---         | chr3:38,589,553-38,691,164 | AX-90075306 |
| SCN5A | rs1805126   | chr3:38,589,553-38,691,164 | AX-14300688 |
| SCN5A | rs137854619 | chr3:38,589,553-38,691,164 | AX-86650285 |
| SCN5A | ---         | chr3:38,589,553-38,691,164 | AX-90032656 |
| SCN5A | rs397514449 | chr3:38,589,553-38,691,164 | AX-90077942 |
| SCN5A | rs137854614 | chr3:38,589,553-38,691,164 | AX-90070904 |
| SCN5A | rs137854615 | chr3:38,589,553-38,691,164 | AX-90070905 |
| SCN5A | ---         | chr3:38,589,553-38,691,164 | AX-90035714 |
| SCN5A | ---         | chr3:38,589,553-38,691,164 | AX-90075198 |
| SCN5A | ---         | chr3:38,589,553-38,691,164 | AX-90032612 |
| SCN5A | ---         | chr3:38,589,553-38,691,164 | AX-90080910 |
| SCN5A | ---         | chr3:38,589,553-38,691,164 | AX-90078767 |
| SCN5A | rs137854601 | chr3:38,589,553-38,691,164 | AX-90042014 |
| SCN5A | rs199473634 | chr3:38,589,553-38,691,164 | AX-86563483 |
| SCN5A | ---         | chr3:38,589,553-38,691,164 | AX-86653836 |
| SCN5A | ---         | chr3:38,589,553-38,691,164 | AX-90034708 |
| SCN5A | ---         | chr3:38,589,553-38,691,164 | AX-90029857 |
| SCN5A | ---         | chr3:38,589,553-38,691,164 | AX-90029670 |
| SCN5A | ---         | chr3:38,589,553-38,691,164 | AX-90027724 |
| SCN5A | ---         | chr3:38,589,553-38,691,164 | AX-90032888 |
| SCN5A | ---         | chr3:38,589,553-38,691,164 | AX-90029471 |
| SCN5A | ---         | chr3:38,589,553-38,691,164 | AX-90045660 |
| SCN5A | ---         | chr3:38,589,553-38,691,164 | AX-90037318 |
| SCN5A | ---         | chr3:38,589,553-38,691,164 | AX-90065998 |
| SCN5A | ---         | chr3:38,589,553-38,691,164 | AX-90036092 |
| SCN5A | ---         | chr3:38,589,553-38,691,164 | AX-90030585 |
| SCN5A | ---         | chr3:38,589,553-38,691,164 | AX-90062984 |
| SCN5A | rs199473303 | chr3:38,589,553-38,691,164 | AX-90068607 |
| SCN5A | ---         | chr3:38,589,553-38,691,164 | AX-90033734 |
| SCN5A | ---         | chr3:38,589,553-38,691,164 | AX-90034740 |
| SCN5A | ---         | chr3:38,589,553-38,691,164 | AX-90029764 |
| SCN5A | ---         | chr3:38,589,553-38,691,164 | AX-90027246 |
| SCN5A | ---         | chr3:38,589,553-38,691,164 | AX-90056849 |
| SCN5A | ---         | chr3:38,589,553-38,691,164 | AX-90035512 |
| SCN5A | rs137854604 | chr3:38,589,553-38,691,164 | AX-90070901 |
| SCN5A | ---         | chr3:38,589,553-38,691,164 | AX-90028267 |
| SCN5A | ---         | chr3:38,589,553-38,691,164 | AX-90064189 |
| SCN5A | ---         | chr3:38,589,553-38,691,164 | AX-90076864 |
| SCN5A | ---         | chr3:38,589,553-38,691,164 | AX-90031049 |
| SCN5A | ---         | chr3:38,589,553-38,691,164 | AX-90036908 |
| SCN5A | ---         | chr3:38,589,553-38,691,164 | AX-90034359 |
| SCN5A | ---         | chr3:38,589,553-38,691,164 | AX-90026302 |

|       |             |                            |             |
|-------|-------------|----------------------------|-------------|
| SCN5A | ---         | chr3:38,589,553-38,691,164 | AX-90046419 |
| SCN5A | ---         | chr3:38,589,553-38,691,164 | AX-90060936 |
| SCN5A | ---         | chr3:38,589,553-38,691,164 | AX-90056860 |
| SCN5A | ---         | chr3:38,589,553-38,691,164 | AX-90027912 |
| SCN5A | ---         | chr3:38,589,553-38,691,164 | AX-90033979 |
| SCN5A | ---         | chr3:38,589,553-38,691,164 | AX-90061022 |
| SCN5A | ---         | chr3:38,589,553-38,691,164 | AX-90030946 |
| SCN5A | ---         | chr3:38,589,553-38,691,164 | AX-90062048 |
| SCN5A | ---         | chr3:38,589,553-38,691,164 | AX-90062775 |
| SCN5A | ---         | chr3:38,589,553-38,691,164 | AX-90030607 |
| SCN5A | rs28937316  | chr3:38,589,553-38,691,164 | AX-90066801 |
| SCN5A | ---         | chr3:38,589,553-38,691,164 | AX-90031850 |
| SCN5A | ---         | chr3:38,589,553-38,691,164 | AX-90037230 |
| SCN5A | ---         | chr3:38,589,553-38,691,164 | AX-86718640 |
| SCN5A | ---         | chr3:38,589,553-38,691,164 | AX-90027405 |
| SCN5A | ---         | chr3:38,589,553-38,691,164 | AX-90032451 |
| SCN5A | ---         | chr3:38,589,553-38,691,164 | AX-90026304 |
| SCN5A | ---         | chr3:38,589,553-38,691,164 | AX-90027108 |
| SCN5A | ---         | chr3:38,589,553-38,691,164 | AX-90064968 |
| SCN5A | ---         | chr3:38,589,553-38,691,164 | AX-90026971 |
| SCN5A | ---         | chr3:38,589,553-38,691,164 | AX-90070903 |
| SCN5A | ---         | chr3:38,589,553-38,691,164 | AX-90055857 |
| SCN5A | ---         | chr3:38,589,553-38,691,164 | AX-86719703 |
| SCN5A | rs41315495  | chr3:38,589,553-38,691,164 | AX-41228983 |
| SCN5A | ---         | chr3:38,589,553-38,691,164 | AX-90026305 |
| SCN5A | ---         | chr3:38,589,553-38,691,164 | AX-90057228 |
| SCN5A | ---         | chr3:38,589,553-38,691,164 | AX-90035741 |
| SCN5A | rs12053903  | chr3:38,589,553-38,691,164 | AX-41228985 |
| SCN5A | rs7619648   | chr3:38,589,553-38,691,164 | AX-34309401 |
| SCN5A | rs7373779   | chr3:38,589,553-38,691,164 | AX-34309403 |
| SCN5A | rs56990533  | chr3:38,589,553-38,691,164 | AX-96927492 |
| SCN5A | rs7638624   | chr3:38,589,553-38,691,164 | AX-96957425 |
| SCN5A | rs7638909   | chr3:38,589,553-38,691,164 | AX-96077108 |
| SCN5A | ---         | chr3:38,589,553-38,691,164 | AX-90072409 |
| SCN5A | ---         | chr3:38,589,553-38,691,164 | AX-86702219 |
| SCN5A | ---         | chr3:38,589,553-38,691,164 | AX-86673218 |
| SCN5A | rs199473278 | chr3:38,589,553-38,691,164 | AX-86577111 |
| SCN5A | ---         | chr3:38,589,553-38,691,164 | AX-90026973 |
| SCN5A | ---         | chr3:38,589,553-38,691,164 | AX-90026974 |
| SCN5A | ---         | chr3:38,589,553-38,691,164 | AX-90061659 |
| SCN5A | ---         | chr3:38,589,553-38,691,164 | AX-90033970 |
| SCN5A | ---         | chr3:38,589,553-38,691,164 | AX-90026306 |
| SCN5A | ---         | chr3:38,589,553-38,691,164 | AX-90036817 |
| SCN5A | rs45514691  | chr3:38,589,553-38,691,164 | AX-11510503 |
| SCN5A | ---         | chr3:38,589,553-38,691,164 | AX-90059225 |
| SCN5A | ---         | chr3:38,589,553-38,691,164 | AX-90050954 |
| SCN5A | ---         | chr3:38,589,553-38,691,164 | AX-90037048 |
| SCN5A | ---         | chr3:38,589,553-38,691,164 | AX-90060536 |
| SCN5A | ---         | chr3:38,589,553-38,691,164 | AX-90033650 |
| SCN5A | ---         | chr3:38,589,553-38,691,164 | AX-90049684 |
| SCN5A | ---         | chr3:38,589,553-38,691,164 | AX-90031068 |
| SCN5A | ---         | chr3:38,589,553-38,691,164 | AX-90056455 |
| SCN5A | ---         | chr3:38,589,553-38,691,164 | AX-90029193 |
| SCN5A | rs199473618 | chr3:38,589,553-38,691,164 | AX-83229868 |
| SCN5A | rs199473269 | chr3:38,589,553-38,691,164 | AX-86688685 |

|       |             |                            |              |
|-------|-------------|----------------------------|--------------|
| SCN5A | ---         | chr3:38,589,553-38,691,164 | AX-90032553  |
| SCN5A | ---         | chr3:38,589,553-38,691,164 | AX-90028792  |
| SCN5A | rs41315501  | chr3:38,589,553-38,691,164 | AX-156274118 |
| SCN5A | rs41315501  | chr3:38,589,553-38,691,164 | AX-156291765 |
| SCN5A | ---         | chr3:38,589,553-38,691,164 | AX-90059487  |
| SCN5A | ---         | chr3:38,589,553-38,691,164 | AX-90031945  |
| SCN5A | ---         | chr3:38,589,553-38,691,164 | AX-90063204  |
| SCN5A | ---         | chr3:38,589,553-38,691,164 | AX-90071966  |
| SCN5A | ---         | chr3:38,589,553-38,691,164 | AX-90030106  |
| SCN5A | ---         | chr3:38,589,553-38,691,164 | AX-90065357  |
| SCN5A | ---         | chr3:38,589,553-38,691,164 | AX-90063295  |
| SCN5A | ---         | chr3:38,589,553-38,691,164 | AX-90051475  |
| SCN5A | rs199473260 | chr3:38,589,553-38,691,164 | AX-90042033  |
| SCN5A | ---         | chr3:38,589,553-38,691,164 | AX-90037432  |
| SCN5A | ---         | chr3:38,589,553-38,691,164 | AX-90030936  |
| SCN5A | ---         | chr3:38,589,553-38,691,164 | AX-90042947  |
| SCN5A | ---         | chr3:38,589,553-38,691,164 | AX-90065054  |
| SCN5A | ---         | chr3:38,589,553-38,691,164 | AX-90029393  |
| SCN5A | rs7645178   | chr3:38,589,553-38,691,164 | AX-41229007  |
| SCN5A | rs41315507  | chr3:38,589,553-38,691,164 | AX-156274119 |
| SCN5A | rs41315507  | chr3:38,589,553-38,691,164 | AX-156291766 |
| SCN5A | ---         | chr3:38,589,553-38,691,164 | AX-90064269  |
| SCN5A | ---         | chr3:38,589,553-38,691,164 | AX-90079357  |
| SCN5A | ---         | chr3:38,589,553-38,691,164 | AX-90026308  |
| SCN5A | ---         | chr3:38,589,553-38,691,164 | AX-90057111  |
| SCN5A | ---         | chr3:38,589,553-38,691,164 | AX-90064876  |
| SCN5A | ---         | chr3:38,589,553-38,691,164 | AX-90076484  |
| SCN5A | ---         | chr3:38,589,553-38,691,164 | AX-90065634  |
| SCN5A | ---         | chr3:38,589,553-38,691,164 | AX-90080328  |
| SCN5A | ---         | chr3:38,589,553-38,691,164 | AX-90029347  |
| SCN5A | ---         | chr3:38,589,553-38,691,164 | AX-90036466  |
| SCN5A | ---         | chr3:38,589,553-38,691,164 | AX-90027646  |
| SCN5A | ---         | chr3:38,589,553-38,691,164 | AX-90058382  |
| SCN5A | ---         | chr3:38,589,553-38,691,164 | AX-90060260  |
| SCN5A | ---         | chr3:38,589,553-38,691,164 | AX-90058895  |
| SCN5A | ---         | chr3:38,589,553-38,691,164 | AX-90036693  |
| SCN5A | ---         | chr3:38,589,553-38,691,164 | AX-90027498  |
| SCN5A | ---         | chr3:38,589,553-38,691,164 | AX-90060020  |
| SCN5A | rs45505695  | chr3:38,589,553-38,691,164 | AX-11510409  |
| SCN5A | rs41312391  | chr3:38,589,553-38,691,164 | AX-41229011  |
| SCN5A | rs41312393  | chr3:38,589,553-38,691,164 | AX-156265641 |
| SCN5A | rs41312393  | chr3:38,589,553-38,691,164 | AX-156265675 |
| SCN5A | ---         | chr3:38,589,553-38,691,164 | AX-90027177  |
| SCN5A | ---         | chr3:38,589,553-38,691,164 | AX-90033139  |
| SCN5A | ---         | chr3:38,589,553-38,691,164 | AX-90057783  |
| SCN5A | ---         | chr3:38,589,553-38,691,164 | AX-90058583  |
| SCN5A | ---         | chr3:38,589,553-38,691,164 | AX-90062706  |
| SCN5A | ---         | chr3:38,589,553-38,691,164 | AX-90064122  |
| SCN5A | rs137854620 | chr3:38,589,553-38,691,164 | AX-88755774  |
| SCN5A | ---         | chr3:38,589,553-38,691,164 | AX-90056048  |
| SCN5A | rs6804918   | chr3:38,589,553-38,691,164 | AX-34309425  |
| SCN5A | rs6793245   | chr3:38,589,553-38,691,164 | AX-11585785  |
| SCN5A | rs11720166  | chr3:38,589,553-38,691,164 | AX-34309429  |
| SCN5A | rs369328824 | chr3:38,589,553-38,691,164 | AX-156286149 |
| SCN5A | rs112108692 | chr3:38,589,553-38,691,164 | AX-156278784 |

|       |             |                            |              |
|-------|-------------|----------------------------|--------------|
| SCN5A | rs112108692 | chr3:38,589,553-38,691,164 | AX-94348720  |
| SCN5A | rs9845438   | chr3:38,589,553-38,691,164 | AX-34309431  |
| SCN5A | rs13059004  | chr3:38,589,553-38,691,164 | AX-41229015  |
| SCN5A | rs6799868   | chr3:38,589,553-38,691,164 | AX-156291767 |
| SCN5A | ---         | chr3:38,589,553-38,691,164 | AX-90055195  |
| SCN5A | ---         | chr3:38,589,553-38,691,164 | AX-90060972  |
| SCN5A | rs137854612 | chr3:38,589,553-38,691,164 | AX-90070761  |
| SCN5A | ---         | chr3:38,589,553-38,691,164 | AX-90031038  |
| SCN5A | ---         | chr3:38,589,553-38,691,164 | AX-90059143  |
| SCN5A | ---         | chr3:38,589,553-38,691,164 | AX-90061843  |
| SCN5A | rs397514446 | chr3:38,589,553-38,691,164 | AX-90049119  |
| SCN5A | ---         | chr3:38,589,553-38,691,164 | AX-90055197  |
| SCN5A | ---         | chr3:38,589,553-38,691,164 | AX-90055198  |
| SCN5A | ---         | chr3:38,589,553-38,691,164 | AX-90061350  |
| SCN5A | ---         | chr3:38,589,553-38,691,164 | AX-90037072  |
| SCN5A | ---         | chr3:38,589,553-38,691,164 | AX-90036899  |
| SCN5A | ---         | chr3:38,589,553-38,691,164 | AX-90065981  |
| SCN5A | ---         | chr3:38,589,553-38,691,164 | AX-90061649  |
| SCN5A | ---         | chr3:38,589,553-38,691,164 | AX-90063255  |
| SCN5A | ---         | chr3:38,589,553-38,691,164 | AX-90027332  |
| SCN5A | ---         | chr3:38,589,553-38,691,164 | AX-90045806  |
| SCN5A | ---         | chr3:38,589,553-38,691,164 | AX-90062377  |
| SCN5A | ---         | chr3:38,589,553-38,691,164 | AX-90060446  |
| SCN5A | ---         | chr3:38,589,553-38,691,164 | AX-90027278  |
| SCN5A | ---         | chr3:38,589,553-38,691,164 | AX-90063136  |
| SCN5A | ---         | chr3:38,589,553-38,691,164 | AX-90057829  |
| SCN5A | ---         | chr3:38,589,553-38,691,164 | AX-90056452  |
| SCN5A | ---         | chr3:38,589,553-38,691,164 | AX-90061234  |
| SCN5A | ---         | chr3:38,589,553-38,691,164 | AX-90057771  |
| SCN5A | ---         | chr3:38,589,553-38,691,164 | AX-86547396  |
| SCN5A | ---         | chr3:38,589,553-38,691,164 | AX-90060314  |
| SCN5A | ---         | chr3:38,589,553-38,691,164 | AX-90059268  |
| SCN5A | ---         | chr3:38,589,553-38,691,164 | AX-90060851  |
| SCN5A | ---         | chr3:38,589,553-38,691,164 | AX-90056905  |
| SCN5A | ---         | chr3:38,589,553-38,691,164 | AX-90035671  |
| SCN5A | ---         | chr3:38,589,553-38,691,164 | AX-90056476  |
| SCN5A | ---         | chr3:38,589,553-38,691,164 | AX-90061612  |
| SCN5A | ---         | chr3:38,589,553-38,691,164 | AX-90066300  |
| SCN5A | rs28937317  | chr3:38,589,553-38,691,164 | AX-90055860  |
| SCN5A | ---         | chr3:38,589,553-38,691,164 | AX-90035247  |
| SCN5A | rs73825594  | chr3:38,589,553-38,691,164 | AX-156274121 |
| SCN5A | rs3935472   | chr3:38,589,553-38,691,164 | AX-11488256  |
| SCN5A | rs62241188  | chr3:38,589,553-38,691,164 | AX-14300695  |
| SCN5A | rs57574696  | chr3:38,589,553-38,691,164 | AX-96946330  |
| SCN5A | rs57574696  | chr3:38,589,553-38,691,164 | AX-96956888  |
| SCN5A | ---         | chr3:38,589,553-38,691,164 | AX-96780764  |
| SCN5A | rs9824500   | chr3:38,589,553-38,691,164 | AX-156267770 |
| SCN5A | rs9824500   | chr3:38,589,553-38,691,164 | AX-156287759 |
| SCN5A | ---         | chr3:38,589,553-38,691,164 | AX-90062451  |
| SCN5A | rs397514447 | chr3:38,589,553-38,691,164 | AX-90057127  |
| SCN5A | rs199473220 | chr3:38,589,553-38,691,164 | AX-86705487  |
| SCN5A | ---         | chr3:38,589,553-38,691,164 | AX-90074928  |
| SCN5A | ---         | chr3:38,589,553-38,691,164 | AX-90035946  |
| SCN5A | rs41313031  | chr3:38,589,553-38,691,164 | AX-83390367  |
| SCN5A | rs199473603 | chr3:38,589,553-38,691,164 | AX-83256635  |

|       |             |                            |             |
|-------|-------------|----------------------------|-------------|
| SCN5A | ---         | chr3:38,589,553-38,691,164 | AX-90073580 |
| SCN5A | rs28937319  | chr3:38,589,553-38,691,164 | AX-90070762 |
| SCN5A | ---         | chr3:38,589,553-38,691,164 | AX-90080495 |
| SCN5A | ---         | chr3:38,589,553-38,691,164 | AX-90063759 |
| SCN5A | rs41311127  | chr3:38,589,553-38,691,164 | AX-83561442 |
| SCN5A | ---         | chr3:38,589,553-38,691,164 | AX-90035265 |
| SCN5A | rs111471466 | chr3:38,589,553-38,691,164 | AX-96904629 |
| SCN5A | rs201499061 | chr3:38,589,553-38,691,164 | AX-96924931 |
| SCN5A | rs6792856   | chr3:38,589,553-38,691,164 | AX-96829452 |
| SCN5A | rs7374138   | chr3:38,589,553-38,691,164 | AX-11623417 |
| SCN5A | rs73070938  | chr3:38,589,553-38,691,164 | AX-34309451 |
| SCN5A | rs7427447   | chr3:38,589,553-38,691,164 | AX-41229025 |
| SCN5A | rs11129796  | chr3:38,589,553-38,691,164 | AX-96981996 |
| SCN5A | rs11129796  | chr3:38,589,553-38,691,164 | AX-96988477 |
| SCN5A | rs62241189  | chr3:38,589,553-38,691,164 | AX-96741507 |
| SCN5A | rs62241189  | chr3:38,589,553-38,691,164 | AX-97392301 |
| SCN5A | rs9832586   | chr3:38,589,553-38,691,164 | AX-41229029 |
| SCN5A | rs9812912   | chr3:38,589,553-38,691,164 | AX-11703515 |
| SCN5A | rs7374605   | chr3:38,589,553-38,691,164 | AX-41229031 |
| SCN5A | rs7372251   | chr3:38,589,553-38,691,164 | AX-96845939 |
| SCN5A | rs7372251   | chr3:38,589,553-38,691,164 | AX-96848028 |
| SCN5A | rs73070948  | chr3:38,589,553-38,691,164 | AX-34309459 |
| SCN5A | ---         | chr3:38,589,553-38,691,164 | AX-90035770 |
| SCN5A | rs199473341 | chr3:38,589,553-38,691,164 | AX-86557322 |
| SCN5A | ---         | chr3:38,589,553-38,691,164 | AX-90061360 |
| SCN5A | rs137854618 | chr3:38,589,553-38,691,164 | AX-90070907 |
| SCN5A | ---         | chr3:38,589,553-38,691,164 | AX-90064782 |
| SCN5A | ---         | chr3:38,589,553-38,691,164 | AX-90057419 |
| SCN5A | rs137854616 | chr3:38,589,553-38,691,164 | AX-86575539 |
| SCN5A | ---         | chr3:38,589,553-38,691,164 | AX-90060566 |
| SCN5A | rs45589741  | chr3:38,589,553-38,691,164 | AX-90066802 |
| SCN5A | ---         | chr3:38,589,553-38,691,164 | AX-90059006 |
| SCN5A | rs199473599 | chr3:38,589,553-38,691,164 | AX-86699238 |
| SCN5A | ---         | chr3:38,589,553-38,691,164 | AX-90028320 |
| SCN5A | ---         | chr3:38,589,553-38,691,164 | AX-90064006 |
| SCN5A | ---         | chr3:38,589,553-38,691,164 | AX-90056496 |
| SCN5A | ---         | chr3:38,589,553-38,691,164 | AX-86639161 |
| SCN5A | ---         | chr3:38,589,553-38,691,164 | AX-90035577 |
| SCN5A | ---         | chr3:38,589,553-38,691,164 | AX-90035118 |
| SCN5A | ---         | chr3:38,589,553-38,691,164 | AX-90031650 |
| SCN5A | ---         | chr3:38,589,553-38,691,164 | AX-90047404 |
| SCN5A | rs9859771   | chr3:38,589,553-38,691,164 | AX-94349489 |
| SCN5A | rs9859771   | chr3:38,589,553-38,691,164 | AX-96975166 |
| SCN5A | rs9822819   | chr3:38,589,553-38,691,164 | AX-41229035 |
| SCN5A | rs34991003  | chr3:38,589,553-38,691,164 | AX-96773584 |
| SCN5A | rs115691534 | chr3:38,589,553-38,691,164 | AX-96811412 |
| SCN5A | rs115691534 | chr3:38,589,553-38,691,164 | AX-96817772 |
| SCN5A | rs9861242   | chr3:38,589,553-38,691,164 | AX-41229037 |
| SCN5A | rs34041219  | chr3:38,589,553-38,691,164 | AX-96977820 |
| SCN5A | rs9833086   | chr3:38,589,553-38,691,164 | AX-11704894 |
| SCN5A | rs60437567  | chr3:38,589,553-38,691,164 | AX-96993707 |
| SCN5A | rs60437567  | chr3:38,589,553-38,691,164 | AX-97486709 |
| SCN5A | rs56961194  | chr3:38,589,553-38,691,164 | AX-96874708 |
| SCN5A | rs56961194  | chr3:38,589,553-38,691,164 | AX-97486691 |
| SCN5A | rs4130467   | chr3:38,589,553-38,691,164 | AX-41229039 |

|       |             |                            |              |
|-------|-------------|----------------------------|--------------|
| SCN5A | rs4131778   | chr3:38,589,553-38,691,164 | AX-41229041  |
| SCN5A | rs6422141   | chr3:38,589,553-38,691,164 | AX-96977339  |
| SCN5A | rs6422141   | chr3:38,589,553-38,691,164 | AX-96992496  |
| SCN5A | rs7620661   | chr3:38,589,553-38,691,164 | AX-12634370  |
| SCN5A | rs7620661   | chr3:38,589,553-38,691,164 | AX-156274122 |
| SCN5A | rs7620883   | chr3:38,589,553-38,691,164 | AX-96737401  |
| SCN5A | rs7620883   | chr3:38,589,553-38,691,164 | AX-97333443  |
| SCN5A | rs7623725   | chr3:38,589,553-38,691,164 | AX-151326337 |
| SCN5A | rs7623725   | chr3:38,589,553-38,691,164 | AX-156278785 |
| SCN5A | rs6772948   | chr3:38,589,553-38,691,164 | AX-34309475  |
| SCN5A | rs58454174  | chr3:38,589,553-38,691,164 | AX-96775692  |
| SCN5A | rs58454174  | chr3:38,589,553-38,691,164 | AX-96782198  |
| SCN5A | rs56856626  | chr3:38,589,553-38,691,164 | AX-151326362 |
| SCN5A | rs56856626  | chr3:38,589,553-38,691,164 | AX-156278786 |
| SCN5A | ---         | chr3:38,589,553-38,691,164 | AX-90042649  |
| SCN5A | ---         | chr3:38,589,553-38,691,164 | AX-90061153  |
| SCN5A | ---         | chr3:38,589,553-38,691,164 | AX-90073093  |
| SCN5A | ---         | chr3:38,589,553-38,691,164 | AX-90055200  |
| SCN5A | ---         | chr3:38,589,553-38,691,164 | AX-90035234  |
| SCN5A | ---         | chr3:38,589,553-38,691,164 | AX-90061026  |
| SCN5A | ---         | chr3:38,589,553-38,691,164 | AX-90031903  |
| SCN5A | rs41261344  | chr3:38,589,553-38,691,164 | AX-34309479  |
| SCN5A | ---         | chr3:38,589,553-38,691,164 | AX-90026316  |
| SCN5A | ---         | chr3:38,589,553-38,691,164 | AX-90026317  |
| SCN5A | ---         | chr3:38,589,553-38,691,164 | AX-86695124  |
| SCN5A | rs41310765  | chr3:38,589,553-38,691,164 | AX-86660151  |
| SCN5A | ---         | chr3:38,589,553-38,691,164 | AX-90058574  |
| SCN5A | ---         | chr3:38,589,553-38,691,164 | AX-90037189  |
| SCN5A | rs6599213   | chr3:38,589,553-38,691,164 | AX-34309481  |
| SCN5A | rs78095439  | chr3:38,589,553-38,691,164 | AX-148595839 |
| SCN5A | rs78095439  | chr3:38,589,553-38,691,164 | AX-156281842 |
| SCN5A | ---         | chr3:38,589,553-38,691,164 | AX-90033017  |
| SCN5A | ---         | chr3:38,589,553-38,691,164 | AX-90060766  |
| SCN5A | ---         | chr3:38,589,553-38,691,164 | AX-90027359  |
| SCN5A | ---         | chr3:38,589,553-38,691,164 | AX-34309489  |
| SCN5A | rs112357181 | chr3:38,589,553-38,691,164 | AX-96795830  |
| SCN5A | rs7373819   | chr3:38,589,553-38,691,164 | AX-41229047  |
| SCN5A | rs7428882   | chr3:38,589,553-38,691,164 | AX-96807906  |
| SCN5A | rs7428882   | chr3:38,589,553-38,691,164 | AX-96818645  |
| SCN5A | rs113845796 | chr3:38,589,553-38,691,164 | AX-96798647  |
| SCN5A | rs113845796 | chr3:38,589,553-38,691,164 | AX-96826756  |
| SCN5A | rs4073103   | chr3:38,589,553-38,691,164 | AX-96987900  |
| SCN5A | rs4073103   | chr3:38,589,553-38,691,164 | AX-97405863  |
| SCN5A | ---         | chr3:38,589,553-38,691,164 | AX-90055203  |
| SCN5A | ---         | chr3:38,589,553-38,691,164 | AX-90026319  |
| SCN5A | ---         | chr3:38,589,553-38,691,164 | AX-90036575  |
| SCN5A | ---         | chr3:38,589,553-38,691,164 | AX-90036219  |
| SCN5A | rs7626962   | chr3:38,589,553-38,691,164 | AX-41229053  |
| SCN5A | rs199473192 | chr3:38,589,553-38,691,164 | AX-82959958  |
| SCN5A | ---         | chr3:38,589,553-38,691,164 | AX-90027519  |
| SCN5A | rs41312411  | chr3:38,589,553-38,691,164 | AX-156291769 |
| SCN5A | rs41313661  | chr3:38,589,553-38,691,164 | AX-156274124 |
| SCN5A | rs41313661  | chr3:38,589,553-38,691,164 | AX-156291770 |
| SCN5A | rs4072710   | chr3:38,589,553-38,691,164 | AX-34309501  |
| SCN5A | rs7430407   | chr3:38,589,553-38,691,164 | AX-41229057  |

|       |             |                            |              |
|-------|-------------|----------------------------|--------------|
| SCN5A | ---         | chr3:38,589,553-38,691,164 | AX-90064479  |
| SCN5A | ---         | chr3:38,589,553-38,691,164 | AX-90062545  |
| SCN5A | rs137854617 | chr3:38,589,553-38,691,164 | AX-90070906  |
| SCN5A | rs199473592 | chr3:38,589,553-38,691,164 | AX-90039723  |
| SCN5A | ---         | chr3:38,589,553-38,691,164 | AX-90028954  |
| SCN5A | ---         | chr3:38,589,553-38,691,164 | AX-90078324  |
| SCN5A | rs199473183 | chr3:38,589,553-38,691,164 | AX-86713610  |
| SCN5A | ---         | chr3:38,589,553-38,691,164 | AX-90074800  |
| SCN5A | rs199473182 | chr3:38,589,553-38,691,164 | AX-86710863  |
| SCN5A | ---         | chr3:38,589,553-38,691,164 | AX-90036660  |
| SCN5A | ---         | chr3:38,589,553-38,691,164 | AX-90043037  |
| SCN5A | rs41311135  | chr3:38,589,553-38,691,164 | AX-90066803  |
| SCN5A | ---         | chr3:38,589,553-38,691,164 | AX-90032386  |
| SCN5A | rs199473180 | chr3:38,589,553-38,691,164 | AX-90066445  |
| SCN5A | ---         | chr3:38,589,553-38,691,164 | AX-90029657  |
| SCN5A | ---         | chr3:38,589,553-38,691,164 | AX-90028394  |
| SCN5A | ---         | chr3:38,589,553-38,691,164 | AX-90051211  |
| SCN5A | rs9870213   | chr3:38,589,553-38,691,164 | AX-96766458  |
| SCN5A | rs9870213   | chr3:38,589,553-38,691,164 | AX-97420099  |
| SCN5A | rs6790619   | chr3:38,589,553-38,691,164 | AX-41229059  |
| SCN5A | rs6772989   | chr3:38,589,553-38,691,164 | AX-156274125 |
| SCN5A | rs6772989   | chr3:38,589,553-38,691,164 | AX-156291771 |
| SCN5A | rs6773055   | chr3:38,589,553-38,691,164 | AX-34309509  |
| SCN5A | rs6773076   | chr3:38,589,553-38,691,164 | AX-41229061  |
| SCN5A | rs3922844   | chr3:38,589,553-38,691,164 | AX-41229063  |
| SCN5A | rs3922843   | chr3:38,589,553-38,691,164 | AX-11487736  |
| SCN5A | rs34519218  | chr3:38,589,553-38,691,164 | AX-156267771 |
| SCN5A | rs34519218  | chr3:38,589,553-38,691,164 | AX-156287760 |
| SCN5A | rs71323670  | chr3:38,589,553-38,691,164 | AX-34309513  |
| SCN5A | rs7374004   | chr3:38,589,553-38,691,164 | AX-41229065  |
| SCN5A | rs7355944   | chr3:38,589,553-38,691,164 | AX-96908452  |
| SCN5A | rs7355944   | chr3:38,589,553-38,691,164 | AX-97263204  |
| SCN5A | rs7432766   | chr3:38,589,553-38,691,164 | AX-41229067  |
| SCN5A | ---         | chr3:38,589,553-38,691,164 | AX-90033714  |
| SCN5A | ---         | chr3:38,589,553-38,691,164 | AX-90057082  |
| SCN5A | ---         | chr3:38,589,553-38,691,164 | AX-90035858  |
| SCN5A | ---         | chr3:38,589,553-38,691,164 | AX-90027117  |
| SCN5A | ---         | chr3:38,589,553-38,691,164 | AX-90058858  |
| SCN5A | ---         | chr3:38,589,553-38,691,164 | AX-90061822  |
| SCN5A | ---         | chr3:38,589,553-38,691,164 | AX-90032414  |
| SCN5A | ---         | chr3:38,589,553-38,691,164 | AX-90029025  |
| SCN5A | ---         | chr3:38,589,553-38,691,164 | AX-90028656  |
| SCN5A | ---         | chr3:38,589,553-38,691,164 | AX-90050541  |
| SCN5A | ---         | chr3:38,589,553-38,691,164 | AX-90080667  |
| SCN5A | ---         | chr3:38,589,553-38,691,164 | AX-90026320  |
| SCN5A | ---         | chr3:38,589,553-38,691,164 | AX-90029743  |
| SCN5A | ---         | chr3:38,589,553-38,691,164 | AX-90078954  |
| SCN5A | ---         | chr3:38,589,553-38,691,164 | AX-90060601  |
| SCN5A | ---         | chr3:38,589,553-38,691,164 | AX-90076667  |
| SCN5A | ---         | chr3:38,589,553-38,691,164 | AX-90034665  |
| SCN5A | ---         | chr3:38,589,553-38,691,164 | AX-90076513  |
| SCN5A | ---         | chr3:38,589,553-38,691,164 | AX-90029647  |
| SCN5A | ---         | chr3:38,589,553-38,691,164 | AX-90073690  |
| SCN5A | ---         | chr3:38,589,553-38,691,164 | AX-90063078  |
| SCN5A | ---         | chr3:38,589,553-38,691,164 | AX-90052147  |

|       |             |                            |              |
|-------|-------------|----------------------------|--------------|
| SCN5A | ---         | chr3:38,589,553-38,691,164 | AX-90064022  |
| SCN5A | ---         | chr3:38,589,553-38,691,164 | AX-90064588  |
| SCN5A | ---         | chr3:38,589,553-38,691,164 | AX-90057358  |
| SCN5A | rs45475899  | chr3:38,589,553-38,691,164 | AX-12574355  |
| SCN5A | ---         | chr3:38,589,553-38,691,164 | AX-90030980  |
| SCN5A | ---         | chr3:38,589,553-38,691,164 | AX-90055206  |
| SCN5A | ---         | chr3:38,589,553-38,691,164 | AX-90059835  |
| SCN5A | ---         | chr3:38,589,553-38,691,164 | AX-90036810  |
| SCN5A | ---         | chr3:38,589,553-38,691,164 | AX-90034185  |
| SCN5A | rs7645173   | chr3:38,589,553-38,691,164 | AX-11635881  |
| SCN5A | rs63694161  | chr3:38,589,553-38,691,164 | AX-96915934  |
| SCN5A | rs63694161  | chr3:38,589,553-38,691,164 | AX-96918117  |
| SCN5A | rs7645358   | chr3:38,589,553-38,691,164 | AX-11635894  |
| SCN5A | rs9311190   | chr3:38,589,553-38,691,164 | AX-41229071  |
| SCN5A | rs11711097  | chr3:38,589,553-38,691,164 | AX-11169598  |
| SCN5A | rs7432532   | chr3:38,589,553-38,691,164 | AX-41229075  |
| SCN5A | ---         | chr3:38,589,553-38,691,164 | AX-90066012  |
| SCN5A | ---         | chr3:38,589,553-38,691,164 | AX-90060079  |
| SCN5A | ---         | chr3:38,589,553-38,691,164 | AX-90058874  |
| SCN5A | ---         | chr3:38,589,553-38,691,164 | AX-90027804  |
| SCN5A | ---         | chr3:38,589,553-38,691,164 | AX-90033655  |
| SCN5A | ---         | chr3:38,589,553-38,691,164 | AX-90033093  |
| SCN5A | ---         | chr3:38,589,553-38,691,164 | AX-90030434  |
| SCN5A | ---         | chr3:38,589,553-38,691,164 | AX-90034495  |
| SCN5A | ---         | chr3:38,589,553-38,691,164 | AX-90036797  |
| SCN5A | ---         | chr3:38,589,553-38,691,164 | AX-90050623  |
| SCN5A | ---         | chr3:38,589,553-38,691,164 | AX-90034352  |
| SCN5A | rs7426433   | chr3:38,589,553-38,691,164 | AX-156274126 |
| SCN5A | rs7426433   | chr3:38,589,553-38,691,164 | AX-156291772 |
| SCN5A | rs7433889   | chr3:38,589,553-38,691,164 | AX-11624716  |
| SCN5A | rs6599214   | chr3:38,589,553-38,691,164 | AX-14300720  |
| SCN5A | rs6599215   | chr3:38,589,553-38,691,164 | AX-34309531  |
| SCN5A | rs6599216   | chr3:38,589,553-38,691,164 | AX-34309533  |
| SCN5A | rs6599217   | chr3:38,589,553-38,691,164 | AX-34309535  |
| SCN5A | rs6599218   | chr3:38,589,553-38,691,164 | AX-147808710 |
| SCN5A | rs6599218   | chr3:38,589,553-38,691,164 | AX-147902688 |
| SCN5A | rs62245110  | chr3:38,589,553-38,691,164 | AX-34309537  |
| SCN5A | rs7613045   | chr3:38,589,553-38,691,164 | AX-14300722  |
| SCN5A | rs63200660  | chr3:38,589,553-38,691,164 | AX-96911042  |
| SCN5A | rs7373157   | chr3:38,589,553-38,691,164 | AX-41229081  |
| SCN5A | rs73070977  | chr3:38,589,553-38,691,164 | AX-34309541  |
| SCN5A | rs73070981  | chr3:38,589,553-38,691,164 | AX-14300724  |
| SCN5A | rs61558743  | chr3:38,589,553-38,691,164 | AX-14300725  |
| SCN5A | rs7374040   | chr3:38,589,553-38,691,164 | AX-11623416  |
| SCN5A | rs61669000  | chr3:38,589,553-38,691,164 | AX-96874451  |
| SCN5A | rs61669000  | chr3:38,589,553-38,691,164 | AX-96889398  |
| SCN5A | rs10154914  | chr3:38,589,553-38,691,164 | AX-14300726  |
| SCN5A | rs141384382 | chr3:38,589,553-38,691,164 | AX-151374321 |
| SCN5A | rs141384382 | chr3:38,589,553-38,691,164 | AX-156284989 |
| SCN5A | rs7374289   | chr3:38,589,553-38,691,164 | AX-11623423  |
| SCN5A | rs11708996  | chr3:38,589,553-38,691,164 | AX-11169410  |
| SCN5A | rs7374540   | chr3:38,589,553-38,691,164 | AX-14300730  |
| SCN5A | rs7373862   | chr3:38,589,553-38,691,164 | AX-156291774 |
| SCN5A | rs9311192   | chr3:38,589,553-38,691,164 | AX-148427025 |
| SCN5A | rs9311192   | chr3:38,589,553-38,691,164 | AX-88736033  |



|       |             |                            |              |
|-------|-------------|----------------------------|--------------|
| SCN5A | rs9311193   | chr3:38,589,553-38,691,164 | AX-96676204  |
| SCN5A | rs9311193   | chr3:38,589,553-38,691,164 | AX-96744173  |
| SCN5A | rs9311194   | chr3:38,589,553-38,691,164 | AX-156281843 |
| SCN5A | rs9311194   | chr3:38,589,553-38,691,164 | AX-156296669 |
| SCN5A | rs7374826   | chr3:38,589,553-38,691,164 | AX-34309551  |
| SCN5A | rs11721012  | chr3:38,589,553-38,691,164 | AX-34309555  |
| SCN5A | rs3924120   | chr3:38,589,553-38,691,164 | AX-34309557  |
| SCN5A | rs62242766  | chr3:38,589,553-38,691,164 | AX-34309561  |
| SCN5A | rs62242767  | chr3:38,589,553-38,691,164 | AX-156274130 |
| SCN5A | rs13062931  | chr3:38,589,553-38,691,164 | AX-156274131 |
| SCN5A | rs13062931  | chr3:38,589,553-38,691,164 | AX-156291775 |
| SCN5A | rs6599219   | chr3:38,589,553-38,691,164 | AX-34309565  |
| SCN5A | rs3935183   | chr3:38,589,553-38,691,164 | AX-34309567  |
| SCN5A | rs3935184   | chr3:38,589,553-38,691,164 | AX-14300738  |
| SCN5A | rs10212202  | chr3:38,589,553-38,691,164 | AX-156291776 |
| SCN5A | rs59559755  | chr3:38,589,553-38,691,164 | AX-34309569  |
| SCN5A | ---         | chr3:38,589,553-38,691,164 | AX-90028769  |
| SCN5A | ---         | chr3:38,589,553-38,691,164 | AX-90031732  |
| SCN5A | rs199473582 | chr3:38,589,553-38,691,164 | AX-90039724  |
| SCN5A | ---         | chr3:38,589,553-38,691,164 | AX-86672701  |
| SCN5A | ---         | chr3:38,589,553-38,691,164 | AX-90031593  |
| SCN5A | ---         | chr3:38,589,553-38,691,164 | AX-90027240  |
| SCN5A | ---         | chr3:38,589,553-38,691,164 | AX-90075746  |
| SCN5A | ---         | chr3:38,589,553-38,691,164 | AX-90061733  |
| SCN5A | rs199473149 | chr3:38,589,553-38,691,164 | AX-86549491  |
| SCN5A | ---         | chr3:38,589,553-38,691,164 | AX-90064100  |
| SCN5A | rs199473147 | chr3:38,589,553-38,691,164 | AX-90039725  |
| SCN5A | ---         | chr3:38,589,553-38,691,164 | AX-90071892  |
| SCN5A | ---         | chr3:38,589,553-38,691,164 | AX-90026322  |
| SCN5A | rs45553235  | chr3:38,589,553-38,691,164 | AX-11510915  |
| SCN5A | rs199473146 | chr3:38,589,553-38,691,164 | AX-83474798  |
| SCN5A | rs199473145 | chr3:38,589,553-38,691,164 | AX-86693505  |
| SCN5A | ---         | chr3:38,589,553-38,691,164 | AX-90036162  |
| SCN5A | ---         | chr3:38,589,553-38,691,164 | AX-90063721  |
| SCN5A | ---         | chr3:38,589,553-38,691,164 | AX-90063014  |
| SCN5A | ---         | chr3:38,589,553-38,691,164 | AX-90030388  |
| SCN5A | ---         | chr3:38,589,553-38,691,164 | AX-90072898  |
| SCN5A | ---         | chr3:38,589,553-38,691,164 | AX-90056173  |
| SCN5A | ---         | chr3:38,589,553-38,691,164 | AX-90072733  |
| SCN5A | rs199473139 | chr3:38,589,553-38,691,164 | AX-86619203  |
| SCN5A | ---         | chr3:38,589,553-38,691,164 | AX-90056770  |
| SCN5A | ---         | chr3:38,589,553-38,691,164 | AX-90027374  |
| SCN5A | ---         | chr3:38,589,553-38,691,164 | AX-90077450  |
| SCN5A | ---         | chr3:38,589,553-38,691,164 | AX-90039726  |
| SCN5A | ---         | chr3:38,589,553-38,691,164 | AX-90043103  |
| SCN5A | ---         | chr3:38,589,553-38,691,164 | AX-90034273  |
| SCN5A | ---         | chr3:38,589,553-38,691,164 | AX-90030268  |
| SCN5A | ---         | chr3:38,589,553-38,691,164 | AX-90061866  |
| SCN5A | ---         | chr3:38,589,553-38,691,164 | AX-90032100  |
| SCN5A | ---         | chr3:38,589,553-38,691,164 | AX-90034948  |
| SCN5A | rs9833775   | chr3:38,589,553-38,691,164 | AX-11704949  |
| SCN5A | rs9871385   | chr3:38,589,553-38,691,164 | AX-41229099  |
| SCN5A | rs62242768  | chr3:38,589,553-38,691,164 | AX-34309577  |
| SCN5A | rs73829008  | chr3:38,589,553-38,691,164 | AX-14300742  |
| SCN5A | rs7427874   | chr3:38,589,553-38,691,164 | AX-96838830  |

|       |             |                            |              |
|-------|-------------|----------------------------|--------------|
| SCN5A | rs7427874   | chr3:38,589,553-38,691,164 | AX-97426891  |
| SCN5A | rs6599221   | chr3:38,589,553-38,691,164 | AX-11574596  |
| SCN5A | rs11714074  | chr3:38,589,553-38,691,164 | AX-41229103  |
| SCN5A | rs41313685  | chr3:38,589,553-38,691,164 | AX-156274133 |
| SCN5A | rs41313685  | chr3:38,589,553-38,691,164 | AX-156291777 |
| SCN5A | rs62242769  | chr3:38,589,553-38,691,164 | AX-34309581  |
| SCN5A | ---         | chr3:38,589,553-38,691,164 | AX-90064362  |
| SCN5A | ---         | chr3:38,589,553-38,691,164 | AX-90060845  |
| SCN5A | rs199473577 | chr3:38,589,553-38,691,164 | AX-83573454  |
| SCN5A | rs199473133 | chr3:38,589,553-38,691,164 | AX-86588562  |
| SCN5A | rs45488304  | chr3:38,589,553-38,691,164 | AX-41229107  |
| SCN5A | rs397517953 | chr3:38,589,553-38,691,164 | AX-90051497  |
| SCN5A | ---         | chr3:38,589,553-38,691,164 | AX-90031013  |
| SCN5A | rs199473128 | chr3:38,589,553-38,691,164 | AX-86558966  |
| SCN5A | ---         | chr3:38,589,553-38,691,164 | AX-90051258  |
| SCN5A | ---         | chr3:38,589,553-38,691,164 | AX-90055208  |
| SCN5A | ---         | chr3:38,589,553-38,691,164 | AX-90058506  |
| SCN5A | rs184442491 | chr3:38,589,553-38,691,164 | AX-86627620  |
| SCN5A | ---         | chr3:38,589,553-38,691,164 | AX-90037348  |
| SCN5A | ---         | chr3:38,589,553-38,691,164 | AX-90034298  |
| SCN5A | rs1805124   | chr3:38,589,553-38,691,164 | AX-50383159  |
| SCN5A | ---         | chr3:38,589,553-38,691,164 | AX-90056033  |
| SCN5A | ---         | chr3:38,589,553-38,691,164 | AX-90056361  |
| SCN5A | ---         | chr3:38,589,553-38,691,164 | AX-90064418  |
| SCN5A | ---         | chr3:38,589,553-38,691,164 | AX-90026324  |
| SCN5A | ---         | chr3:38,589,553-38,691,164 | AX-86567742  |
| SCN5A | ---         | chr3:38,589,553-38,691,164 | AX-90031225  |
| SCN5A | rs45627438  | chr3:38,589,553-38,691,164 | AX-86578366  |
| SCN5A | rs41313691  | chr3:38,589,553-38,691,164 | AX-41229111  |
| SCN5A | ---         | chr3:38,589,553-38,691,164 | AX-90034663  |
| SCN5A | ---         | chr3:38,589,553-38,691,164 | AX-90074353  |
| SCN5A | rs137854606 | chr3:38,589,553-38,691,164 | AX-90070902  |
| SCN5A | ---         | chr3:38,589,553-38,691,164 | AX-90080162  |
| SCN5A | ---         | chr3:38,589,553-38,691,164 | AX-90055862  |
| SCN5A | rs34535972  | chr3:38,589,553-38,691,164 | AX-34309589  |
| SCN5A | rs13084981  | chr3:38,589,553-38,691,164 | AX-41229113  |
| SCN5A | ---         | chr3:38,589,553-38,691,164 | AX-90064068  |
| SCN5A | ---         | chr3:38,589,553-38,691,164 | AX-90077961  |
| SCN5A | ---         | chr3:38,589,553-38,691,164 | AX-90026325  |
| SCN5A | ---         | chr3:38,589,553-38,691,164 | AX-90063479  |
| SCN5A | ---         | chr3:38,589,553-38,691,164 | AX-90031776  |
| SCN5A | rs199473572 | chr3:38,589,553-38,691,164 | AX-86655392  |
| SCN5A | rs7428779   | chr3:38,589,553-38,691,164 | AX-41229115  |
| SCN5A | rs55899887  | chr3:38,589,553-38,691,164 | AX-34309591  |
| SCN5A | rs11711602  | chr3:38,589,553-38,691,164 | AX-41229117  |
| SCN5A | ---         | chr3:38,589,553-38,691,164 | AX-90064950  |
| SCN5A | rs199473339 | chr3:38,589,553-38,691,164 | AX-86683660  |
| SCN5A | ---         | chr3:38,589,553-38,691,164 | AX-90058498  |
| SCN5A | ---         | chr3:38,589,553-38,691,164 | AX-90060189  |
| SCN5A | ---         | chr3:38,589,553-38,691,164 | AX-86673515  |
| SCN5A | rs199473111 | chr3:38,589,553-38,691,164 | AX-83154288  |
| SCN5A | ---         | chr3:38,589,553-38,691,164 | AX-90055211  |
| SCN5A | ---         | chr3:38,589,553-38,691,164 | AX-90035632  |
| SCN5A | ---         | chr3:38,589,553-38,691,164 | AX-86585594  |
| SCN5A | rs72549410  | chr3:38,589,553-38,691,164 | AX-90070824  |

|       |             |                            |             |
|-------|-------------|----------------------------|-------------|
| SCN5A | ---         | chr3:38,589,553-38,691,164 | AX-90028294 |
| SCN5A | ---         | chr3:38,589,553-38,691,164 | AX-90031692 |
| SCN5A | ---         | chr3:38,589,553-38,691,164 | AX-90060274 |
| SCN5A | ---         | chr3:38,589,553-38,691,164 | AX-90063502 |
| SCN5A | ---         | chr3:38,589,553-38,691,164 | AX-90057244 |
| SCN5A | ---         | chr3:38,589,553-38,691,164 | AX-90032379 |
| SCN5A | ---         | chr3:38,589,553-38,691,164 | AX-90063636 |
| SCN5A | ---         | chr3:38,589,553-38,691,164 | AX-90027711 |
| SCN5A | ---         | chr3:38,589,553-38,691,164 | AX-90030233 |
| SCN5A | ---         | chr3:38,589,553-38,691,164 | AX-90033229 |
| SCN5A | ---         | chr3:38,589,553-38,691,164 | AX-90034222 |
| SCN5A | ---         | chr3:38,589,553-38,691,164 | AX-90031873 |
| SCN5A | rs41312433  | chr3:38,589,553-38,691,164 | AX-34309597 |
| SCN5A | rs6770569   | chr3:38,589,553-38,691,164 | AX-41229119 |
| SCN5A | rs6599222   | chr3:38,589,553-38,691,164 | AX-96775727 |
| SCN5A | rs6599222   | chr3:38,589,553-38,691,164 | AX-97437347 |
| SCN5A | rs199473101 | chr3:38,589,553-38,691,164 | AX-90066036 |
| SCN5A | ---         | chr3:38,589,553-38,691,164 | AX-90059479 |
| SCN5A | ---         | chr3:38,589,553-38,691,164 | AX-90066275 |
| SCN5A | ---         | chr3:38,589,553-38,691,164 | AX-90062087 |
| SCN5A | ---         | chr3:38,589,553-38,691,164 | AX-90065551 |
| SCN5A | ---         | chr3:38,589,553-38,691,164 | AX-90029659 |
| SCN5A | ---         | chr3:38,589,553-38,691,164 | AX-90035009 |
| SCN5A | ---         | chr3:38,589,553-38,691,164 | AX-90061568 |
| SCN5A | ---         | chr3:38,589,553-38,691,164 | AX-90026327 |
| SCN5A | ---         | chr3:38,589,553-38,691,164 | AX-90031393 |
| SCN5A | ---         | chr3:38,589,553-38,691,164 | AX-90060084 |
| SCN5A | ---         | chr3:38,589,553-38,691,164 | AX-90027230 |
| SCN5A | rs12491987  | chr3:38,589,553-38,691,164 | AX-41229125 |
| SCN5A | rs187531872 | chr3:38,589,553-38,691,164 | AX-86727574 |
| SCN5A | ---         | chr3:38,589,553-38,691,164 | AX-90030746 |
| SCN5A | ---         | chr3:38,589,553-38,691,164 | AX-86620981 |
| SCN5A | ---         | chr3:38,589,553-38,691,164 | AX-90064998 |
| SCN5A | ---         | chr3:38,589,553-38,691,164 | AX-90065633 |
| SCN5A | rs13315133  | chr3:38,589,553-38,691,164 | AX-41229127 |
| SCN5A | rs9873213   | chr3:38,589,553-38,691,164 | AX-96910517 |
| SCN5A | rs9873213   | chr3:38,589,553-38,691,164 | AX-97419956 |
| SCN5A | rs13322122  | chr3:38,589,553-38,691,164 | AX-34309607 |
| SCN5A | rs9853984   | chr3:38,589,553-38,691,164 | AX-41229129 |
| SCN5A | rs6599223   | chr3:38,589,553-38,691,164 | AX-41229131 |
| SCN5A | rs76022277  | chr3:38,589,553-38,691,164 | AX-34309617 |
| SCN5A | rs10718761  | chr3:38,589,553-38,691,164 | AX-96780369 |
| SCN5A | rs10718761  | chr3:38,589,553-38,691,164 | AX-97327860 |
| SCN5A | rs182050752 | chr3:38,589,553-38,691,164 | AX-86691519 |
| SCN5A | ---         | chr3:38,589,553-38,691,164 | AX-90060000 |
| SCN5A | ---         | chr3:38,589,553-38,691,164 | AX-90030554 |
| SCN5A | ---         | chr3:38,589,553-38,691,164 | AX-90027076 |
| SCN5A | rs137854608 | chr3:38,589,553-38,691,164 | AX-86594659 |
| SCN5A | ---         | chr3:38,589,553-38,691,164 | AX-90063638 |
| SCN5A | rs199473085 | chr3:38,589,553-38,691,164 | AX-86656868 |
| SCN5A | rs199473084 | chr3:38,589,553-38,691,164 | AX-86660196 |
| SCN5A | ---         | chr3:38,589,553-38,691,164 | AX-90034105 |
| SCN5A | ---         | chr3:38,589,553-38,691,164 | AX-90031661 |
| SCN5A | ---         | chr3:38,589,553-38,691,164 | AX-90031256 |
| SCN5A | ---         | chr3:38,589,553-38,691,164 | AX-90034397 |

|       |             |                            |              |
|-------|-------------|----------------------------|--------------|
| SCN5A | ---         | chr3:38,589,553-38,691,164 | AX-90062385  |
| SCN5A | ---         | chr3:38,589,553-38,691,164 | AX-90036687  |
| SCN5A | ---         | chr3:38,589,553-38,691,164 | AX-90026328  |
| SCN5A | ---         | chr3:38,589,553-38,691,164 | AX-90062939  |
| SCN5A | ---         | chr3:38,589,553-38,691,164 | AX-90036338  |
| SCN5A | ---         | chr3:38,589,553-38,691,164 | AX-90065160  |
| SCN5A | rs9831389   | chr3:38,589,553-38,691,164 | AX-41229133  |
| SCN5A | ---         | chr3:38,589,553-38,691,164 | AX-41229135  |
| SCN5A | rs75318896  | chr3:38,589,553-38,691,164 | AX-34309623  |
| SCN5A | rs6599225   | chr3:38,589,553-38,691,164 | AX-50383164  |
| SCN5A | rs6599226   | chr3:38,589,553-38,691,164 | AX-156274134 |
| SCN5A | rs6599226   | chr3:38,589,553-38,691,164 | AX-156291778 |
| SCN5A | rs6599227   | chr3:38,589,553-38,691,164 | AX-41229143  |
| SCN5A | rs7430191   | chr3:38,589,553-38,691,164 | AX-11223772  |
| SCN5A | rs7430191   | chr3:38,589,553-38,691,164 | AX-97295475  |
| SCN5A | rs9874830   | chr3:38,589,553-38,691,164 | AX-151146932 |
| SCN5A | rs9874830   | chr3:38,589,553-38,691,164 | AX-156278787 |
| SCN5A | rs6790718   | chr3:38,589,553-38,691,164 | AX-41229145  |
| SCN5A | rs6793943   | chr3:38,589,553-38,691,164 | AX-41229147  |
| SCN5A | rs6791081   | chr3:38,589,553-38,691,164 | AX-41229149  |
| SCN5A | rs6776383   | chr3:38,589,553-38,691,164 | AX-156274135 |
| SCN5A | rs6776383   | chr3:38,589,553-38,691,164 | AX-156291779 |
| SCN5A | rs6786119   | chr3:38,589,553-38,691,164 | AX-41229151  |
| SCN5A | rs9851962   | chr3:38,589,553-38,691,164 | AX-41229153  |
| SCN5A | rs41314302  | chr3:38,589,553-38,691,164 | AX-34309631  |
| SCN5A | ---         | chr3:38,589,553-38,691,164 | AX-90036229  |
| SCN5A | ---         | chr3:38,589,553-38,691,164 | AX-86733651  |
| SCN5A | ---         | chr3:38,589,553-38,691,164 | AX-90063922  |
| SCN5A | rs199473071 | chr3:38,589,553-38,691,164 | AX-90059370  |
| SCN5A | rs199473072 | chr3:38,589,553-38,691,164 | AX-86681147  |
| SCN5A | ---         | chr3:38,589,553-38,691,164 | AX-90027029  |
| SCN5A | ---         | chr3:38,589,553-38,691,164 | AX-90064071  |
| SCN5A | rs45620037  | chr3:38,589,553-38,691,164 | AX-83280554  |
| SCN5A | ---         | chr3:38,589,553-38,691,164 | AX-90077051  |
| SCN5A | ---         | chr3:38,589,553-38,691,164 | AX-90058517  |
| SCN5A | rs41276525  | chr3:38,589,553-38,691,164 | AX-83379999  |
| SCN5A | ---         | chr3:38,589,553-38,691,164 | AX-90034214  |
| SCN5A | rs370438420 | chr3:38,589,553-38,691,164 | AX-86552551  |
| SCN5A | rs9856587   | chr3:38,589,553-38,691,164 | AX-96740225  |
| SCN5A | rs9856587   | chr3:38,589,553-38,691,164 | AX-96746794  |
| SCN5A | rs6797133   | chr3:38,589,553-38,691,164 | AX-41229157  |
| SCN5A | rs41314304  | chr3:38,589,553-38,691,164 | AX-34309637  |
| SCN5A | rs41314314  | chr3:38,589,553-38,691,164 | AX-34309643  |
| SCN5A | rs41312945  | chr3:38,589,553-38,691,164 | AX-34309645  |
| SCN5A | rs73054549  | chr3:38,589,553-38,691,164 | AX-34309647  |
| SCN5A | rs77613778  | chr3:38,589,553-38,691,164 | AX-34309649  |
| SCN5A | rs7430361   | chr3:38,589,553-38,691,164 | AX-34309651  |
| SCN5A | rs7431920   | chr3:38,589,553-38,691,164 | AX-34309653  |
| SCN5A | rs7433206   | chr3:38,589,553-38,691,164 | AX-156291780 |
| SCN5A | rs7433206   | chr3:38,589,553-38,691,164 | AX-96861710  |
| SCN5A | rs11710077  | chr3:38,589,553-38,691,164 | AX-41229165  |
| SCN5A | rs11926428  | chr3:38,589,553-38,691,164 | AX-41229167  |
| SCN5A | rs73054554  | chr3:38,589,553-38,691,164 | AX-156291781 |
| SCN5A | rs76337192  | chr3:38,589,553-38,691,164 | AX-14300746  |
| SCN5A | rs34767956  | chr3:38,589,553-38,691,164 | AX-34309659  |

|       |             |                            |              |
|-------|-------------|----------------------------|--------------|
| SCN5A | rs35349722  | chr3:38,589,553-38,691,164 | AX-34309661  |
| SCN5A | rs199917358 | chr3:38,589,553-38,691,164 | AX-97471835  |
| SCN5A | rs62242801  | chr3:38,589,553-38,691,164 | AX-34309663  |
| SCN5A | rs62242802  | chr3:38,589,553-38,691,164 | AX-34309665  |
| SCN5A | rs73825705  | chr3:38,589,553-38,691,164 | AX-14300747  |
| SCN5A | rs7637849   | chr3:38,589,553-38,691,164 | AX-41229169  |
| SCN5A | rs7433085   | chr3:38,589,553-38,691,164 | AX-34309669  |
| SCN5A | rs55824920  | chr3:38,589,553-38,691,164 | AX-34309671  |
| SCN5A | rs80101046  | chr3:38,589,553-38,691,164 | AX-34309673  |
| SCN5A | rs12498069  | chr3:38,589,553-38,691,164 | AX-41229173  |
| SCN5A | rs9832895   | chr3:38,589,553-38,691,164 | AX-41229175  |
| SCN5A | rs397514252 | chr3:38,589,553-38,691,164 | AX-90079705  |
| SCN5A | ---         | chr3:38,589,553-38,691,164 | AX-90061323  |
| SCN5A | rs199473559 | chr3:38,589,553-38,691,164 | AX-90055214  |
| SCN5A | ---         | chr3:38,589,553-38,691,164 | AX-90055215  |
| SCN5A | ---         | chr3:38,589,553-38,691,164 | AX-86574062  |
| SCN5A | ---         | chr3:38,589,553-38,691,164 | AX-86607294  |
| SCN5A | ---         | chr3:38,589,553-38,691,164 | AX-90032053  |
| SCN5A | ---         | chr3:38,589,553-38,691,164 | AX-90056236  |
| SCN5A | rs192113333 | chr3:38,589,553-38,691,164 | AX-82902709  |
| SCN5A | ---         | chr3:38,589,553-38,691,164 | AX-90055216  |
| SCN5A | ---         | chr3:38,589,553-38,691,164 | AX-90059595  |
| SCN5A | ---         | chr3:38,589,553-38,691,164 | AX-90028501  |
| SCN5A | ---         | chr3:38,589,553-38,691,164 | AX-90063410  |
| SCN5A | ---         | chr3:38,589,553-38,691,164 | AX-90081484  |
| SCN5A | ---         | chr3:38,589,553-38,691,164 | AX-90046493  |
| SCN5A | rs6599228   | chr3:38,589,553-38,691,164 | AX-41229177  |
| SCN5A | rs6781731   | chr3:38,589,553-38,691,164 | AX-50383172  |
| SCN5A | ---         | chr3:38,589,553-38,691,164 | AX-86568177  |
| SCN5A | ---         | chr3:38,589,553-38,691,164 | AX-90057345  |
| SCN5A | ---         | chr3:38,589,553-38,691,164 | AX-90026332  |
| SCN5A | ---         | chr3:38,589,553-38,691,164 | AX-90055218  |
| SCN5A | ---         | chr3:38,589,553-38,691,164 | AX-86655656  |
| SCN5A | ---         | chr3:38,589,553-38,691,164 | AX-90076157  |
| SCN5A | rs199473060 | chr3:38,589,553-38,691,164 | AX-86707946  |
| SCN5A | ---         | chr3:38,589,553-38,691,164 | AX-90062057  |
| SCN5A | ---         | chr3:38,589,553-38,691,164 | AX-90062992  |
| SCN5A | rs368678204 | chr3:38,589,553-38,691,164 | AX-86623271  |
| SCN5A | rs7431305   | chr3:38,589,553-38,691,164 | AX-96769724  |
| SCN5A | rs7431305   | chr3:38,589,553-38,691,164 | AX-96789031  |
| SCN5A | rs3934936   | chr3:38,589,553-38,691,164 | AX-96775768  |
| SCN5A | rs3934936   | chr3:38,589,553-38,691,164 | AX-96782295  |
| SCN5A | rs3934937   | chr3:38,589,553-38,691,164 | AX-156274137 |
| SCN5A | rs72862756  | chr3:38,589,553-38,691,164 | AX-34309701  |
| SCN5A | rs9876660   | chr3:38,589,553-38,691,164 | AX-41229185  |
| SCN5A | rs78615060  | chr3:38,589,553-38,691,164 | AX-34309703  |
| SCN5A | rs7624535   | chr3:38,589,553-38,691,164 | AX-41229189  |
| SCN5A | rs75398812  | chr3:38,589,553-38,691,164 | AX-38048533  |
| SCN5A | rs79352669  | chr3:38,589,553-38,691,164 | AX-38048535  |
| SCN5A | rs78532995  | chr3:38,589,553-38,691,164 | AX-96765034  |
| SCN5A | rs75882699  | chr3:38,589,553-38,691,164 | AX-96861005  |
| SCN5A | rs7633974   | chr3:38,589,553-38,691,164 | AX-41229193  |
| SCN5A | rs7627552   | chr3:38,589,553-38,691,164 | AX-96772249  |
| SCN5A | rs7627552   | chr3:38,589,553-38,691,164 | AX-96787281  |
| SCN5A | rs62242807  | chr3:38,589,553-38,691,164 | AX-156295091 |

|       |             |                            |              |
|-------|-------------|----------------------------|--------------|
| SCN5A | rs62242807  | chr3:38,589,553-38,691,164 | AX-96842413  |
| SCN5A | rs76736254  | chr3:38,589,553-38,691,164 | AX-156274138 |
| SCN5A | rs76736254  | chr3:38,589,553-38,691,164 | AX-97301473  |
| SCN5A | rs76040087  | chr3:38,589,553-38,691,164 | AX-34309707  |
| SCN5A | rs13314361  | chr3:38,589,553-38,691,164 | AX-41229197  |
| SCN5A | rs7432590   | chr3:38,589,553-38,691,164 | AX-96813509  |
| SCN5A | rs7432590   | chr3:38,589,553-38,691,164 | AX-96815589  |
| SCN5A | rs34712780  | chr3:38,589,553-38,691,164 | AX-96773427  |
| SCN5A | rs6795580   | chr3:38,589,553-38,691,164 | AX-41229201  |
| SCN5A | rs144207380 | chr3:38,589,553-38,691,164 | AX-156298098 |
| SCN5A | rs7647031   | chr3:38,589,553-38,691,164 | AX-96916265  |
| SCN5A | rs7647031   | chr3:38,589,553-38,691,164 | AX-96918472  |
| SCN5A | rs41258324  | chr3:38,589,553-38,691,164 | AX-156274139 |
| SCN5A | rs9818148   | chr3:38,589,553-38,691,164 | AX-34309723  |
| SCN5A | rs7374891   | chr3:38,589,553-38,691,164 | AX-156291784 |
| SCN5A | rs7374891   | chr3:38,589,553-38,691,164 | AX-96867177  |
| SCN5A | rs112041752 | chr3:38,589,553-38,691,164 | AX-148495059 |
| SCN5A | rs112041752 | chr3:38,589,553-38,691,164 | AX-156278788 |
| SCN5A | rs7375123   | chr3:38,589,553-38,691,164 | AX-34309735  |
| SCN5A | rs9848555   | chr3:38,589,553-38,691,164 | AX-34309737  |
| SCN5A | rs77604382  | chr3:38,589,553-38,691,164 | AX-34309741  |
| SCN5A | rs7373076   | chr3:38,589,553-38,691,164 | AX-34309743  |
| SCN5A | rs7431820   | chr3:38,589,553-38,691,164 | AX-34309745  |
| SCN5A | rs73056438  | chr3:38,589,553-38,691,164 | AX-34309749  |
| SCN5A | rs45567533  | chr3:38,589,553-38,691,164 | AX-34309751  |
| SCN5A | rs41312963  | chr3:38,589,553-38,691,164 | AX-34309753  |
| SCN5A | ---         | chr3:38,589,553-38,691,164 | AX-90072955  |
| SCN5A | rs199473059 | chr3:38,589,553-38,691,164 | AX-86571862  |
| SCN5A | ---         | chr3:38,589,553-38,691,164 | AX-90057484  |
| SCN5A | ---         | chr3:38,589,553-38,691,164 | AX-90057456  |
| SCN5A | ---         | chr3:38,589,553-38,691,164 | AX-90056202  |
| SCN5A | ---         | chr3:38,589,553-38,691,164 | AX-90035174  |
| SCN5A | ---         | chr3:38,589,553-38,691,164 | AX-90028538  |
| SCN5A | ---         | chr3:38,589,553-38,691,164 | AX-90063745  |
| SCN5A | ---         | chr3:38,589,553-38,691,164 | AX-90056743  |
| SCN5A | rs199473054 | chr3:38,589,553-38,691,164 | AX-86585308  |
| SCN5A | ---         | chr3:38,589,553-38,691,164 | AX-90060273  |
| SCN5A | ---         | chr3:38,589,553-38,691,164 | AX-90059103  |
| SCN5A | rs7627488   | chr3:38,589,553-38,691,164 | AX-34309755  |
| SCN5A | rs7636280   | chr3:38,589,553-38,691,164 | AX-96952601  |
| SCN5A | rs7636280   | chr3:38,589,553-38,691,164 | AX-97386194  |
| SCN5A | rs6599229   | chr3:38,589,553-38,691,164 | AX-11574597  |
| SCN5A | rs7374392   | chr3:38,589,553-38,691,164 | AX-34309761  |
| SCN5A | rs7432959   | chr3:38,589,553-38,691,164 | AX-41229205  |
| SCN5A | rs56053699  | chr3:38,589,553-38,691,164 | AX-34309767  |
| SCN5A | rs7433003   | chr3:38,589,553-38,691,164 | AX-34309769  |
| SCN5A | rs35199243  | chr3:38,589,553-38,691,164 | AX-34309773  |
| SCN5A | ---         | chr3:38,589,553-38,691,164 | AX-90030465  |
| SCN5A | ---         | chr3:38,589,553-38,691,164 | AX-90058917  |
| SCN5A | ---         | chr3:38,589,553-38,691,164 | AX-90057552  |
| SCN5A | ---         | chr3:38,589,553-38,691,164 | AX-90051344  |
| SCN5A | ---         | chr3:38,589,553-38,691,164 | AX-90055219  |
| SCN5A | ---         | chr3:38,589,553-38,691,164 | AX-90030008  |
| SCN5A | ---         | chr3:38,589,553-38,691,164 | AX-90061479  |
| SCN5A | ---         | chr3:38,589,553-38,691,164 | AX-86627932  |

|       |             |                            |              |
|-------|-------------|----------------------------|--------------|
| SCN5A | ---         | chr3:38,589,553-38,691,164 | AX-90043503  |
| SCN5A | rs6791924   | chr3:38,589,553-38,691,164 | AX-41229207  |
| SCN5A | rs6599230   | chr3:38,589,553-38,691,164 | AX-34309781  |
| SCN5A | rs562675882 | chr3:38,589,553-38,691,164 | AX-90059626  |
| SCN5A | rs41311087  | chr3:38,589,553-38,691,164 | AX-90037920  |
| SCN5A | rs199473044 | chr3:38,589,553-38,691,164 | AX-90060236  |
| SCN5A | ---         | chr3:38,589,553-38,691,164 | AX-90063416  |
| SCN5A | ---         | chr3:38,589,553-38,691,164 | AX-90026337  |
| SCN5A | ---         | chr3:38,589,553-38,691,164 | AX-90055223  |
| SCN5A | rs11719543  | chr3:38,589,553-38,691,164 | AX-156274140 |
| SCN5A | rs11719543  | chr3:38,589,553-38,691,164 | AX-156291785 |
| SCN5A | rs11720524  | chr3:38,589,553-38,691,164 | AX-41229209  |
| SCN5A | rs13060541  | chr3:38,589,553-38,691,164 | AX-41229213  |
| SCN5A | rs11710223  | chr3:38,589,553-38,691,164 | AX-156274141 |
| SCN5A | rs11710223  | chr3:38,589,553-38,691,164 | AX-156291786 |
| SCN5A | rs7651854   | chr3:38,589,553-38,691,164 | AX-96867189  |
| SCN5A | rs7651854   | chr3:38,589,553-38,691,164 | AX-97260867  |
| SCN5A | rs6768135   | chr3:38,589,553-38,691,164 | AX-147911127 |
| SCN5A | rs35430286  | chr3:38,589,553-38,691,164 | AX-34309795  |
| SCN5A | rs7427106   | chr3:38,589,553-38,691,164 | AX-11624462  |
| SCN5A | rs7427119   | chr3:38,589,553-38,691,164 | AX-156274143 |
| SCN5A | rs7427119   | chr3:38,589,553-38,691,164 | AX-156291788 |
| SCN5A | rs34636473  | chr3:38,589,553-38,691,164 | AX-34309801  |
| SCN5A | rs111784596 | chr3:38,589,553-38,691,164 | AX-34309805  |
| SCN5A | rs13073578  | chr3:38,589,553-38,691,164 | AX-41229221  |
| SCN5A | rs41314851  | chr3:38,589,553-38,691,164 | AX-11494558  |
| SCN5A | rs7373102   | chr3:38,589,553-38,691,164 | AX-41229225  |
| SCN5A | rs35029027  | chr3:38,589,553-38,691,164 | AX-34309811  |
| SCN5A | rs9311195   | chr3:38,589,553-38,691,164 | AX-11679996  |
| SCN5A | rs73056454  | chr3:38,589,553-38,691,164 | AX-34309813  |
| SCN5A | rs6763048   | chr3:38,589,553-38,691,164 | AX-41229229  |
| SCN5A | rs9875443   | chr3:38,589,553-38,691,164 | AX-156281844 |
| SCN5A | rs9875443   | chr3:38,589,553-38,691,164 | AX-96934123  |
| SCN5A | rs41314861  | chr3:38,589,553-38,691,164 | AX-34309817  |
| SCN5A | rs9880327   | chr3:38,589,553-38,691,164 | AX-34309819  |
| SCN5A | rs13097780  | chr3:38,589,553-38,691,164 | AX-34309821  |
| SCN5A | rs112401327 | chr3:38,589,553-38,691,164 | AX-34309823  |
| SCN5A | rs80172327  | chr3:38,589,553-38,691,164 | AX-34309831  |
| SCN5A | rs6768664   | chr3:38,589,553-38,691,164 | AX-11584029  |
| SCN5A | rs6599231   | chr3:38,589,553-38,691,164 | AX-34309837  |
| SCN5A | rs7427574   | chr3:38,589,553-38,691,164 | AX-34309839  |
| SCN5A | rs57458156  | chr3:38,589,553-38,691,164 | AX-156274144 |
| SCN5A | rs57458156  | chr3:38,589,553-38,691,164 | AX-156291789 |
| SCN5A | ---         | chr3:38,589,553-38,691,164 | AX-34309847  |
| SCN5A | rs544071590 | chr3:38,589,553-38,691,164 | AX-151443905 |
| SCN5A | rs544071590 | chr3:38,589,553-38,691,164 | AX-156298434 |
| SCN5A | rs112058833 | chr3:38,589,553-38,691,164 | AX-34309851  |
| SCN5A | rs7372712   | chr3:38,589,553-38,691,164 | AX-11623382  |
| SCN5A | rs11711288  | chr3:38,589,553-38,691,164 | AX-34309857  |
| SCN5A | rs55812368  | chr3:38,589,553-38,691,164 | AX-34309859  |
| SCN5A | rs9856387   | chr3:38,589,553-38,691,164 | AX-34309861  |
| SCN5A | rs34682488  | chr3:38,589,553-38,691,164 | AX-14300760  |
| SCN5A | rs9841023   | chr3:38,589,553-38,691,164 | AX-34309865  |
| SCN5A | rs55742514  | chr3:38,589,553-38,691,164 | AX-34309867  |
| SCN5A | rs9841329   | chr3:38,589,553-38,691,164 | AX-34309869  |

|       |             |                              |              |
|-------|-------------|------------------------------|--------------|
| SCN5A | rs79160746  | chr3:38,589,553-38,691,164   | AX-34309883  |
| SCN5A | rs9809363   | chr3:38,589,553-38,691,164   | AX-41229239  |
| SCN5A | rs9814083   | chr3:38,589,553-38,691,164   | AX-34309891  |
| SCN5A | rs72862787  | chr3:38,589,553-38,691,164   | AX-34309893  |
| SCN5A | rs72862788  | chr3:38,589,553-38,691,164   | AX-34309895  |
| SCN5A | rs41310234  | chr3:38,589,553-38,691,164   | AX-34309897  |
| SGCD  | rs73297590  | chr5:155,135,063-156,194,798 | AX-14941377  |
| SGCD  | rs56829274  | chr5:155,135,063-156,194,798 | AX-14941378  |
| SGCD  | rs12655253  | chr5:155,135,063-156,194,798 | AX-14941379  |
| SGCD  | rs7733760   | chr5:155,135,063-156,194,798 | AX-12638590  |
| SGCD  | rs13160569  | chr5:155,135,063-156,194,798 | AX-123105452 |
| SGCD  | rs28601600  | chr5:155,135,063-156,194,798 | AX-156275442 |
| SGCD  | rs28601600  | chr5:155,135,063-156,194,798 | AX-156292652 |
| SGCD  | rs200057738 | chr5:155,135,063-156,194,798 | AX-153324007 |
| SGCD  | rs200057738 | chr5:155,135,063-156,194,798 | AX-156284310 |
| SGCD  | rs138321378 | chr5:155,135,063-156,194,798 | AX-120224135 |
| SGCD  | rs138321378 | chr5:155,135,063-156,194,798 | AX-156285546 |
| SGCD  | rs150903903 | chr5:155,135,063-156,194,798 | AX-148201780 |
| SGCD  | rs150903903 | chr5:155,135,063-156,194,798 | AX-156297659 |
| SGCD  | rs145586715 | chr5:155,135,063-156,194,798 | AX-148536585 |
| SGCD  | rs145586715 | chr5:155,135,063-156,194,798 | AX-156284047 |
| SGCD  | rs148875892 | chr5:155,135,063-156,194,798 | AX-148376300 |
| SGCD  | rs28971928  | chr5:155,135,063-156,194,798 | AX-14941384  |
| SGCD  | rs34330815  | chr5:155,135,063-156,194,798 | AX-120887749 |
| SGCD  | rs34330815  | chr5:155,135,063-156,194,798 | AX-156275443 |
| SGCD  | rs73810312  | chr5:155,135,063-156,194,798 | AX-14941386  |
| SGCD  | rs79266455  | chr5:155,135,063-156,194,798 | AX-35168059  |
| SGCD  | rs4077765   | chr5:155,135,063-156,194,798 | AX-156296921 |
| SGCD  | rs56324461  | chr5:155,135,063-156,194,798 | AX-14941393  |
| SGCD  | rs4434365   | chr5:155,135,063-156,194,798 | AX-11505506  |
| SGCD  | rs62382293  | chr5:155,135,063-156,194,798 | AX-35168071  |
| SGCD  | rs12187106  | chr5:155,135,063-156,194,798 | AX-14941398  |
| SGCD  | rs148917570 | chr5:155,135,063-156,194,798 | AX-156286378 |
| SGCD  | rs7379262   | chr5:155,135,063-156,194,798 | AX-14941400  |
| SGCD  | rs141033817 | chr5:155,135,063-156,194,798 | AX-120172639 |
| SGCD  | rs7446885   | chr5:155,135,063-156,194,798 | AX-156275444 |
| SGCD  | rs7446885   | chr5:155,135,063-156,194,798 | AX-156292653 |
| SGCD  | rs62382294  | chr5:155,135,063-156,194,798 | AX-35168079  |
| SGCD  | rs6556604   | chr5:155,135,063-156,194,798 | AX-14941405  |
| SGCD  | rs74764373  | chr5:155,135,063-156,194,798 | AX-14941406  |
| SGCD  | rs113068515 | chr5:155,135,063-156,194,798 | AX-38253903  |
| SGCD  | rs57306484  | chr5:155,135,063-156,194,798 | AX-14941407  |
| SGCD  | rs79905952  | chr5:155,135,063-156,194,798 | AX-14941410  |
| SGCD  | rs73297601  | chr5:155,135,063-156,194,798 | AX-35168081  |
| SGCD  | ---         | chr5:155,135,063-156,194,798 | AX-153331457 |
| SGCD  | rs10063232  | chr5:155,135,063-156,194,798 | AX-156275445 |
| SGCD  | rs10063232  | chr5:155,135,063-156,194,798 | AX-96557002  |
| SGCD  | rs7717301   | chr5:155,135,063-156,194,798 | AX-11640796  |
| SGCD  | rs79363839  | chr5:155,135,063-156,194,798 | AX-14941413  |
| SGCD  | rs6865768   | chr5:155,135,063-156,194,798 | AX-156275446 |
| SGCD  | rs6865768   | chr5:155,135,063-156,194,798 | AX-156292654 |
| SGCD  | rs6865887   | chr5:155,135,063-156,194,798 | AX-41643607  |
| SGCD  | rs73810314  | chr5:155,135,063-156,194,798 | AX-14941416  |
| SGCD  | rs35102821  | chr5:155,135,063-156,194,798 | AX-123077771 |
| SGCD  | rs35102821  | chr5:155,135,063-156,194,798 | AX-123077772 |



|      |             |                              |              |
|------|-------------|------------------------------|--------------|
| SGCD | rs56102724  | chr5:155,135,063-156,194,798 | AX-14941420  |
| SGCD | rs76035004  | chr5:155,135,063-156,194,798 | AX-14941421  |
| SGCD | rs4608908   | chr5:155,135,063-156,194,798 | AX-14941422  |
| SGCD | rs11134451  | chr5:155,135,063-156,194,798 | AX-14941425  |
| SGCD | rs11134451  | chr5:155,135,063-156,194,798 | AX-156275447 |
| SGCD | rs4518375   | chr5:155,135,063-156,194,798 | AX-156292655 |
| SGCD | rs12173162  | chr5:155,135,063-156,194,798 | AX-14941427  |
| SGCD | rs77549720  | chr5:155,135,063-156,194,798 | AX-14941428  |
| SGCD | rs12173249  | chr5:155,135,063-156,194,798 | AX-11194116  |
| SGCD | rs73810315  | chr5:155,135,063-156,194,798 | AX-14941430  |
| SGCD | rs11134474  | chr5:155,135,063-156,194,798 | AX-41643611  |
| SGCD | rs11134484  | chr5:155,135,063-156,194,798 | AX-41643613  |
| SGCD | rs4357020   | chr5:155,135,063-156,194,798 | AX-41643615  |
| SGCD | rs113490650 | chr5:155,135,063-156,194,798 | AX-14941431  |
| SGCD | rs113490650 | chr5:155,135,063-156,194,798 | AX-153352653 |
| SGCD | rs7446674   | chr5:155,135,063-156,194,798 | AX-41643617  |
| SGCD | rs62382310  | chr5:155,135,063-156,194,798 | AX-14941434  |
| SGCD | rs13158911  | chr5:155,135,063-156,194,798 | AX-14941436  |
| SGCD | rs35497401  | chr5:155,135,063-156,194,798 | AX-153254732 |
| SGCD | rs35497401  | chr5:155,135,063-156,194,798 | AX-156297977 |
| SGCD | rs4616876   | chr5:155,135,063-156,194,798 | AX-11513783  |
| SGCD | rs74460347  | chr5:155,135,063-156,194,798 | AX-35168099  |
| SGCD | rs62382311  | chr5:155,135,063-156,194,798 | AX-14941439  |
| SGCD | rs62382312  | chr5:155,135,063-156,194,798 | AX-35168103  |
| SGCD | rs77073288  | chr5:155,135,063-156,194,798 | AX-14941441  |
| SGCD | rs78161813  | chr5:155,135,063-156,194,798 | AX-14941442  |
| SGCD | rs11948011  | chr5:155,135,063-156,194,798 | AX-12423848  |
| SGCD | rs7714002   | chr5:155,135,063-156,194,798 | AX-14941446  |
| SGCD | rs11741070  | chr5:155,135,063-156,194,798 | AX-41643621  |
| SGCD | rs115113993 | chr5:155,135,063-156,194,798 | AX-14941447  |
| SGCD | rs75213788  | chr5:155,135,063-156,194,798 | AX-14941448  |
| SGCD | rs12514871  | chr5:155,135,063-156,194,798 | AX-35168109  |
| SGCD | rs74365071  | chr5:155,135,063-156,194,798 | AX-35168111  |
| SGCD | rs12187392  | chr5:155,135,063-156,194,798 | AX-156275449 |
| SGCD | rs12187392  | chr5:155,135,063-156,194,798 | AX-156292656 |
| SGCD | rs76517429  | chr5:155,135,063-156,194,798 | AX-14941454  |
| SGCD | rs12186863  | chr5:155,135,063-156,194,798 | AX-14941455  |
| SGCD | rs62382313  | chr5:155,135,063-156,194,798 | AX-156275450 |
| SGCD | rs6876341   | chr5:155,135,063-156,194,798 | AX-35168117  |
| SGCD | rs9942327   | chr5:155,135,063-156,194,798 | AX-35168119  |
| SGCD | rs34507862  | chr5:155,135,063-156,194,798 | AX-148257851 |
| SGCD | rs34507862  | chr5:155,135,063-156,194,798 | AX-156275451 |
| SGCD | rs34760156  | chr5:155,135,063-156,194,798 | AX-35168123  |
| SGCD | rs76064151  | chr5:155,135,063-156,194,798 | AX-14941458  |
| SGCD | rs10462910  | chr5:155,135,063-156,194,798 | AX-14941459  |
| SGCD | rs10462911  | chr5:155,135,063-156,194,798 | AX-12389432  |
| SGCD | rs114183248 | chr5:155,135,063-156,194,798 | AX-14941464  |
| SGCD | rs4526089   | chr5:155,135,063-156,194,798 | AX-156292657 |
| SGCD | rs17524681  | chr5:155,135,063-156,194,798 | AX-156268145 |
| SGCD | rs17524681  | chr5:155,135,063-156,194,798 | AX-156288011 |
| SGCD | rs78189004  | chr5:155,135,063-156,194,798 | AX-14941472  |
| SGCD | rs6895293   | chr5:155,135,063-156,194,798 | AX-156268146 |
| SGCD | rs6875928   | chr5:155,135,063-156,194,798 | AX-35168139  |
| SGCD | rs114271976 | chr5:155,135,063-156,194,798 | AX-156288013 |
| SGCD | rs13153098  | chr5:155,135,063-156,194,798 | AX-35168141  |

|      |             |                              |              |
|------|-------------|------------------------------|--------------|
| SGCD | rs77651304  | chr5:155,135,063-156,194,798 | AX-14941475  |
| SGCD | rs78338115  | chr5:155,135,063-156,194,798 | AX-14941478  |
| SGCD | rs35751638  | chr5:155,135,063-156,194,798 | AX-35168145  |
| SGCD | rs4273588   | chr5:155,135,063-156,194,798 | AX-148389029 |
| SGCD | rs4273588   | chr5:155,135,063-156,194,798 | AX-156268148 |
| SGCD | rs12521468  | chr5:155,135,063-156,194,798 | AX-35168149  |
| SGCD | rs115349939 | chr5:155,135,063-156,194,798 | AX-148719776 |
| SGCD | rs115349939 | chr5:155,135,063-156,194,798 | AX-156282262 |
| SGCD | rs62382317  | chr5:155,135,063-156,194,798 | AX-153342175 |
| SGCD | rs62382317  | chr5:155,135,063-156,194,798 | AX-156284048 |
| SGCD | rs17052864  | chr5:155,135,063-156,194,798 | AX-14941482  |
| SGCD | rs115963734 | chr5:155,135,063-156,194,798 | AX-148660649 |
| SGCD | rs115963734 | chr5:155,135,063-156,194,798 | AX-156268149 |
| SGCD | rs114131615 | chr5:155,135,063-156,194,798 | AX-156268150 |
| SGCD | rs114131615 | chr5:155,135,063-156,194,798 | AX-156288014 |
| SGCD | rs62382318  | chr5:155,135,063-156,194,798 | AX-14941489  |
| SGCD | rs7447243   | chr5:155,135,063-156,194,798 | AX-156268151 |
| SGCD | rs7447243   | chr5:155,135,063-156,194,798 | AX-156288015 |
| SGCD | rs79365858  | chr5:155,135,063-156,194,798 | AX-14941492  |
| SGCD | rs11744001  | chr5:155,135,063-156,194,798 | AX-14941494  |
| SGCD | rs116017842 | chr5:155,135,063-156,194,798 | AX-122780368 |
| SGCD | rs116017842 | chr5:155,135,063-156,194,798 | AX-148810565 |
| SGCD | rs2127371   | chr5:155,135,063-156,194,798 | AX-156268152 |
| SGCD | rs140901312 | chr5:155,135,063-156,194,798 | AX-88783562  |
| SGCD | rs140901312 | chr5:155,135,063-156,194,798 | AX-96555555  |
| SGCD | rs17052865  | chr5:155,135,063-156,194,798 | AX-14941497  |
| SGCD | rs17052868  | chr5:155,135,063-156,194,798 | AX-156282263 |
| SGCD | rs17052868  | chr5:155,135,063-156,194,798 | AX-156296922 |
| SGCD | rs6866497   | chr5:155,135,063-156,194,798 | AX-41643635  |
| SGCD | rs10476284  | chr5:155,135,063-156,194,798 | AX-14941499  |
| SGCD | rs57521482  | chr5:155,135,063-156,194,798 | AX-14941504  |
| SGCD | rs7379436   | chr5:155,135,063-156,194,798 | AX-156288017 |
| SGCD | rs80088893  | chr5:155,135,063-156,194,798 | AX-148606065 |
| SGCD | rs80088893  | chr5:155,135,063-156,194,798 | AX-156268154 |
| SGCD | rs2046038   | chr5:155,135,063-156,194,798 | AX-35168169  |
| SGCD | rs62382322  | chr5:155,135,063-156,194,798 | AX-156268155 |
| SGCD | rs62382322  | chr5:155,135,063-156,194,798 | AX-156288018 |
| SGCD | rs1479555   | chr5:155,135,063-156,194,798 | AX-35168173  |
| SGCD | ---         | chr5:155,135,063-156,194,798 | AX-156285894 |
| SGCD | rs1479554   | chr5:155,135,063-156,194,798 | AX-156268156 |
| SGCD | rs1479554   | chr5:155,135,063-156,194,798 | AX-156288019 |
| SGCD | rs1351280   | chr5:155,135,063-156,194,798 | AX-14941517  |
| SGCD | rs17052874  | chr5:155,135,063-156,194,798 | AX-156296923 |
| SGCD | rs7379212   | chr5:155,135,063-156,194,798 | AX-14941518  |
| SGCD | rs11135083  | chr5:155,135,063-156,194,798 | AX-41643647  |
| SGCD | rs11135084  | chr5:155,135,063-156,194,798 | AX-41643649  |
| SGCD | rs6885265   | chr5:155,135,063-156,194,798 | AX-14941521  |
| SGCD | rs7447880   | chr5:155,135,063-156,194,798 | AX-14941524  |
| SGCD | rs77571180  | chr5:155,135,063-156,194,798 | AX-156275453 |
| SGCD | rs77571180  | chr5:155,135,063-156,194,798 | AX-156292658 |
| SGCD | rs76605141  | chr5:155,135,063-156,194,798 | AX-14941526  |
| SGCD | rs7444825   | chr5:155,135,063-156,194,798 | AX-156275454 |
| SGCD | rs7444825   | chr5:155,135,063-156,194,798 | AX-156292659 |
| SGCD | rs1382878   | chr5:155,135,063-156,194,798 | AX-14941529  |
| SGCD | rs62382323  | chr5:155,135,063-156,194,798 | AX-14941530  |

|      |             |                              |              |
|------|-------------|------------------------------|--------------|
| SGCD | rs62382324  | chr5:155,135,063-156,194,798 | AX-35168189  |
| SGCD | rs13154433  | chr5:155,135,063-156,194,798 | AX-148191653 |
| SGCD | rs13154433  | chr5:155,135,063-156,194,798 | AX-96864023  |
| SGCD | rs10462919  | chr5:155,135,063-156,194,798 | AX-148367430 |
| SGCD | rs10462919  | chr5:155,135,063-156,194,798 | AX-148719718 |
| SGCD | rs7378633   | chr5:155,135,063-156,194,798 | AX-148253289 |
| SGCD | rs62382325  | chr5:155,135,063-156,194,798 | AX-114035808 |
| SGCD | rs62382325  | chr5:155,135,063-156,194,798 | AX-148503734 |
| SGCD | rs13188692  | chr5:155,135,063-156,194,798 | AX-151172261 |
| SGCD | rs13188692  | chr5:155,135,063-156,194,798 | AX-156284049 |
| SGCD | rs10462920  | chr5:155,135,063-156,194,798 | AX-12389433  |
| SGCD | rs13170805  | chr5:155,135,063-156,194,798 | AX-11242717  |
| SGCD | rs77204876  | chr5:155,135,063-156,194,798 | AX-14941534  |
| SGCD | rs115613946 | chr5:155,135,063-156,194,798 | AX-35168191  |
| SGCD | rs7379008   | chr5:155,135,063-156,194,798 | AX-14941536  |
| SGCD | rs6556478   | chr5:155,135,063-156,194,798 | AX-156268157 |
| SGCD | rs6556478   | chr5:155,135,063-156,194,798 | AX-156288020 |
| SGCD | rs72812192  | chr5:155,135,063-156,194,798 | AX-14941539  |
| SGCD | rs7712917   | chr5:155,135,063-156,194,798 | AX-14941541  |
| SGCD | ---         | chr5:155,135,063-156,194,798 | AX-14941542  |
| SGCD | rs77656837  | chr5:155,135,063-156,194,798 | AX-14941544  |
| SGCD | rs17052889  | chr5:155,135,063-156,194,798 | AX-41643655  |
| SGCD | rs72812194  | chr5:155,135,063-156,194,798 | AX-14941545  |
| SGCD | rs7445962   | chr5:155,135,063-156,194,798 | AX-156282265 |
| SGCD | rs7705775   | chr5:155,135,063-156,194,798 | AX-50448216  |
| SGCD | rs10515729  | chr5:155,135,063-156,194,798 | AX-41643657  |
| SGCD | rs10515730  | chr5:155,135,063-156,194,798 | AX-11114993  |
| SGCD | ---         | chr5:155,135,063-156,194,798 | AX-156286115 |
| SGCD | rs17052899  | chr5:155,135,063-156,194,798 | AX-12487852  |
| SGCD | rs111308348 | chr5:155,135,063-156,194,798 | AX-148563439 |
| SGCD | rs111308348 | chr5:155,135,063-156,194,798 | AX-156284050 |
| SGCD | rs145171516 | chr5:155,135,063-156,194,798 | AX-148810725 |
| SGCD | rs145171516 | chr5:155,135,063-156,194,798 | AX-156284051 |
| SGCD | rs35125194  | chr5:155,135,063-156,194,798 | AX-148670712 |
| SGCD | rs35125194  | chr5:155,135,063-156,194,798 | AX-156275455 |
| SGCD | rs35483609  | chr5:155,135,063-156,194,798 | AX-148259797 |
| SGCD | rs11743011  | chr5:155,135,063-156,194,798 | AX-148573375 |
| SGCD | rs11743011  | chr5:155,135,063-156,194,798 | AX-156268158 |
| SGCD | rs77675863  | chr5:155,135,063-156,194,798 | AX-14941550  |
| SGCD | rs1545773   | chr5:155,135,063-156,194,798 | AX-12468886  |
| SGCD | rs980914    | chr5:155,135,063-156,194,798 | AX-35168203  |
| SGCD | rs2569028   | chr5:155,135,063-156,194,798 | AX-14941553  |
| SGCD | rs2569029   | chr5:155,135,063-156,194,798 | AX-156268159 |
| SGCD | rs2569029   | chr5:155,135,063-156,194,798 | AX-156288021 |
| SGCD | rs75698624  | chr5:155,135,063-156,194,798 | AX-14941555  |
| SGCD | rs78268325  | chr5:155,135,063-156,194,798 | AX-14941558  |
| SGCD | rs76516504  | chr5:155,135,063-156,194,798 | AX-14941559  |
| SGCD | rs2217640   | chr5:155,135,063-156,194,798 | AX-14941560  |
| SGCD | rs11738666  | chr5:155,135,063-156,194,798 | AX-14941562  |
| SGCD | rs61332716  | chr5:155,135,063-156,194,798 | AX-14941564  |
| SGCD | rs6420106   | chr5:155,135,063-156,194,798 | AX-14941565  |
| SGCD | rs114609185 | chr5:155,135,063-156,194,798 | AX-156275457 |
| SGCD | rs114609185 | chr5:155,135,063-156,194,798 | AX-156292660 |
| SGCD | rs2569030   | chr5:155,135,063-156,194,798 | AX-156275458 |
| SGCD | rs2569030   | chr5:155,135,063-156,194,798 | AX-156292661 |

|      |             |                              |              |
|------|-------------|------------------------------|--------------|
| SGCD | rs111229407 | chr5:155,135,063-156,194,798 | AX-14941568  |
| SGCD | rs114402302 | chr5:155,135,063-156,194,798 | AX-156275459 |
| SGCD | rs114402302 | chr5:155,135,063-156,194,798 | AX-156292662 |
| SGCD | rs75873627  | chr5:155,135,063-156,194,798 | AX-14941570  |
| SGCD | rs2619725   | chr5:155,135,063-156,194,798 | AX-14941572  |
| SGCD | rs2569031   | chr5:155,135,063-156,194,798 | AX-12532144  |
| SGCD | rs62382330  | chr5:155,135,063-156,194,798 | AX-14941573  |
| SGCD | rs2619724   | chr5:155,135,063-156,194,798 | AX-50448219  |
| SGCD | rs2569032   | chr5:155,135,063-156,194,798 | AX-11398918  |
| SGCD | rs2619723   | chr5:155,135,063-156,194,798 | AX-14941580  |
| SGCD | rs1432814   | chr5:155,135,063-156,194,798 | AX-156275460 |
| SGCD | rs1432814   | chr5:155,135,063-156,194,798 | AX-156292663 |
| SGCD | rs77676362  | chr5:155,135,063-156,194,798 | AX-14941584  |
| SGCD | rs76433976  | chr5:155,135,063-156,194,798 | AX-14941585  |
| SGCD | rs76857637  | chr5:155,135,063-156,194,798 | AX-14941588  |
| SGCD | rs2619722   | chr5:155,135,063-156,194,798 | AX-41643675  |
| SGCD | rs6876095   | chr5:155,135,063-156,194,798 | AX-148424400 |
| SGCD | rs6876095   | chr5:155,135,063-156,194,798 | AX-156275461 |
| SGCD | rs10434699  | chr5:155,135,063-156,194,798 | AX-153332287 |
| SGCD | rs10434699  | chr5:155,135,063-156,194,798 | AX-156275462 |
| SGCD | rs10434700  | chr5:155,135,063-156,194,798 | AX-156282266 |
| SGCD | rs2619721   | chr5:155,135,063-156,194,798 | AX-50448220  |
| SGCD | rs116136949 | chr5:155,135,063-156,194,798 | AX-14941592  |
| SGCD | rs11291385  | chr5:155,135,063-156,194,798 | AX-11154766  |
| SGCD | rs114944823 | chr5:155,135,063-156,194,798 | AX-14941593  |
| SGCD | rs79108524  | chr5:155,135,063-156,194,798 | AX-14941594  |
| SGCD | rs2619720   | chr5:155,135,063-156,194,798 | AX-14941595  |
| SGCD | rs78128930  | chr5:155,135,063-156,194,798 | AX-14941598  |
| SGCD | rs114221206 | chr5:155,135,063-156,194,798 | AX-14941600  |
| SGCD | rs2619718   | chr5:155,135,063-156,194,798 | AX-14941602  |
| SGCD | rs3846688   | chr5:155,135,063-156,194,798 | AX-156275463 |
| SGCD | rs3846688   | chr5:155,135,063-156,194,798 | AX-156292664 |
| SGCD | rs78154039  | chr5:155,135,063-156,194,798 | AX-14941606  |
| SGCD | rs11745289  | chr5:155,135,063-156,194,798 | AX-14941607  |
| SGCD | rs74330127  | chr5:155,135,063-156,194,798 | AX-14941609  |
| SGCD | rs6556568   | chr5:155,135,063-156,194,798 | AX-14941610  |
| SGCD | rs2569033   | chr5:155,135,063-156,194,798 | AX-122583289 |
| SGCD | rs2569033   | chr5:155,135,063-156,194,798 | AX-156292665 |
| SGCD | rs78767053  | chr5:155,135,063-156,194,798 | AX-14941612  |
| SGCD | rs202034555 | chr5:155,135,063-156,194,798 | AX-149013376 |
| SGCD | rs202034555 | chr5:155,135,063-156,194,798 | AX-153329929 |
| SGCD | rs200342209 | chr5:155,135,063-156,194,798 | AX-121282644 |
| SGCD | rs201199660 | chr5:155,135,063-156,194,798 | AX-153271209 |
| SGCD | rs4362928   | chr5:155,135,063-156,194,798 | AX-12570786  |
| SGCD | rs9313906   | chr5:155,135,063-156,194,798 | AX-41643687  |
| SGCD | rs9313907   | chr5:155,135,063-156,194,798 | AX-14941615  |
| SGCD | rs1432816   | chr5:155,135,063-156,194,798 | AX-14941620  |
| SGCD | rs1432817   | chr5:155,135,063-156,194,798 | AX-86335265  |
| SGCD | rs6875111   | chr5:155,135,063-156,194,798 | AX-11591438  |
| SGCD | rs10064619  | chr5:155,135,063-156,194,798 | AX-156275464 |
| SGCD | rs34817459  | chr5:155,135,063-156,194,798 | AX-156275465 |
| SGCD | rs34817459  | chr5:155,135,063-156,194,798 | AX-156292666 |
| SGCD | rs2619717   | chr5:155,135,063-156,194,798 | AX-14941626  |
| SGCD | rs11135225  | chr5:155,135,063-156,194,798 | AX-14941635  |
| SGCD | rs1432818   | chr5:155,135,063-156,194,798 | AX-156282267 |

|      |             |                              |              |
|------|-------------|------------------------------|--------------|
| SGCD | rs1432818   | chr5:155,135,063-156,194,798 | AX-156296926 |
| SGCD | rs142415348 | chr5:155,135,063-156,194,798 | AX-153329391 |
| SGCD | rs115051635 | chr5:155,135,063-156,194,798 | AX-14941639  |
| SGCD | rs117423930 | chr5:155,135,063-156,194,798 | AX-148667884 |
| SGCD | rs117423930 | chr5:155,135,063-156,194,798 | AX-156282268 |
| SGCD | rs62382351  | chr5:155,135,063-156,194,798 | AX-35168243  |
| SGCD | rs116324036 | chr5:155,135,063-156,194,798 | AX-14941642  |
| SGCD | rs2569034   | chr5:155,135,063-156,194,798 | AX-14941644  |
| SGCD | rs11135229  | chr5:155,135,063-156,194,798 | AX-14941647  |
| SGCD | rs199634853 | chr5:155,135,063-156,194,798 | AX-153335450 |
| SGCD | ---         | chr5:155,135,063-156,194,798 | AX-119489217 |
| SGCD | rs2619715   | chr5:155,135,063-156,194,798 | AX-14941649  |
| SGCD | rs74753416  | chr5:155,135,063-156,194,798 | AX-14941650  |
| SGCD | rs114405775 | chr5:155,135,063-156,194,798 | AX-153341311 |
| SGCD | rs114405775 | chr5:155,135,063-156,194,798 | AX-156275466 |
| SGCD | rs11743670  | chr5:155,135,063-156,194,798 | AX-156275467 |
| SGCD | rs11743670  | chr5:155,135,063-156,194,798 | AX-156292667 |
| SGCD | rs11743693  | chr5:155,135,063-156,194,798 | AX-148672338 |
| SGCD | rs11743693  | chr5:155,135,063-156,194,798 | AX-156275468 |
| SGCD | rs12521447  | chr5:155,135,063-156,194,798 | AX-156275469 |
| SGCD | rs12521447  | chr5:155,135,063-156,194,798 | AX-156292668 |
| SGCD | rs10073856  | chr5:155,135,063-156,194,798 | AX-14941651  |
| SGCD | rs6873333   | chr5:155,135,063-156,194,798 | AX-41643701  |
| SGCD | rs201015575 | chr5:155,135,063-156,194,798 | AX-156298203 |
| SGCD | rs77519690  | chr5:155,135,063-156,194,798 | AX-14941653  |
| SGCD | rs72814211  | chr5:155,135,063-156,194,798 | AX-156275470 |
| SGCD | rs72814211  | chr5:155,135,063-156,194,798 | AX-156292669 |
| SGCD | rs2569023   | chr5:155,135,063-156,194,798 | AX-148258036 |
| SGCD | rs2569023   | chr5:155,135,063-156,194,798 | AX-156275471 |
| SGCD | rs62382353  | chr5:155,135,063-156,194,798 | AX-88321001  |
| SGCD | rs62382353  | chr5:155,135,063-156,194,798 | AX-88327517  |
| SGCD | rs79931516  | chr5:155,135,063-156,194,798 | AX-14941655  |
| SGCD | rs2619714   | chr5:155,135,063-156,194,798 | AX-14941656  |
| SGCD | rs2619713   | chr5:155,135,063-156,194,798 | AX-156275472 |
| SGCD | rs2619713   | chr5:155,135,063-156,194,798 | AX-156292670 |
| SGCD | rs2619712   | chr5:155,135,063-156,194,798 | AX-35168263  |
| SGCD | ---         | chr5:155,135,063-156,194,798 | AX-153348396 |
| SGCD | ---         | chr5:155,135,063-156,194,798 | AX-156298569 |
| SGCD | rs2619710   | chr5:155,135,063-156,194,798 | AX-105155698 |
| SGCD | rs2619710   | chr5:155,135,063-156,194,798 | AX-156275474 |
| SGCD | rs115776377 | chr5:155,135,063-156,194,798 | AX-38253917  |
| SGCD | rs6860927   | chr5:155,135,063-156,194,798 | AX-156275475 |
| SGCD | rs6860927   | chr5:155,135,063-156,194,798 | AX-97249200  |
| SGCD | rs62382356  | chr5:155,135,063-156,194,798 | AX-35168279  |
| SGCD | rs114477925 | chr5:155,135,063-156,194,798 | AX-14941661  |
| SGCD | rs11742133  | chr5:155,135,063-156,194,798 | AX-50448229  |
| SGCD | rs1897554   | chr5:155,135,063-156,194,798 | AX-14941662  |
| SGCD | rs77447671  | chr5:155,135,063-156,194,798 | AX-14941664  |
| SGCD | rs2569024   | chr5:155,135,063-156,194,798 | AX-148373020 |
| SGCD | rs2569024   | chr5:155,135,063-156,194,798 | AX-156282269 |
| SGCD | rs200038727 | chr5:155,135,063-156,194,798 | AX-153343038 |
| SGCD | rs200038727 | chr5:155,135,063-156,194,798 | AX-156298539 |
| SGCD | rs10076006  | chr5:155,135,063-156,194,798 | AX-14941668  |
| SGCD | rs2569025   | chr5:155,135,063-156,194,798 | AX-14941669  |
| SGCD | rs1019928   | chr5:155,135,063-156,194,798 | AX-14941671  |

|      |             |                              |              |
|------|-------------|------------------------------|--------------|
| SGCD | rs41472848  | chr5:155,135,063-156,194,798 | AX-14941676  |
| SGCD | rs62382359  | chr5:155,135,063-156,194,798 | AX-14941677  |
| SGCD | rs2619728   | chr5:155,135,063-156,194,798 | AX-11401741  |
| SGCD | rs116591184 | chr5:155,135,063-156,194,798 | AX-14941680  |
| SGCD | rs2248389   | chr5:155,135,063-156,194,798 | AX-11378527  |
| SGCD | rs7706170   | chr5:155,135,063-156,194,798 | AX-35168297  |
| SGCD | rs76415033  | chr5:155,135,063-156,194,798 | AX-14941682  |
| SGCD | rs7736695   | chr5:155,135,063-156,194,798 | AX-14941686  |
| SGCD | rs1432812   | chr5:155,135,063-156,194,798 | AX-14941687  |
| SGCD | rs6895133   | chr5:155,135,063-156,194,798 | AX-11592720  |
| SGCD | rs2619727   | chr5:155,135,063-156,194,798 | AX-14941690  |
| SGCD | rs3846690   | chr5:155,135,063-156,194,798 | AX-14941692  |
| SGCD | rs12518602  | chr5:155,135,063-156,194,798 | AX-14941693  |
| SGCD | rs5872439   | chr5:155,135,063-156,194,798 | AX-121820464 |
| SGCD | ---         | chr5:155,135,063-156,194,798 | AX-148664468 |
| SGCD | ---         | chr5:155,135,063-156,194,798 | AX-156284052 |
| SGCD | rs75017687  | chr5:155,135,063-156,194,798 | AX-35168307  |
| SGCD | rs59458149  | chr5:155,135,063-156,194,798 | AX-35168309  |
| SGCD | rs200244865 | chr5:155,135,063-156,194,798 | AX-153258528 |
| SGCD | rs200244865 | chr5:155,135,063-156,194,798 | AX-156286431 |
| SGCD | rs71285050  | chr5:155,135,063-156,194,798 | AX-14941697  |
| SGCD | rs71285050  | chr5:155,135,063-156,194,798 | AX-156285193 |
| SGCD | rs2061908   | chr5:155,135,063-156,194,798 | AX-14941698  |
| SGCD | rs28424124  | chr5:155,135,063-156,194,798 | AX-35168311  |
| SGCD | rs28592780  | chr5:155,135,063-156,194,798 | AX-156275476 |
| SGCD | rs28592780  | chr5:155,135,063-156,194,798 | AX-156292672 |
| SGCD | rs7447535   | chr5:155,135,063-156,194,798 | AX-14941701  |
| SGCD | rs6556773   | chr5:155,135,063-156,194,798 | AX-41643711  |
| SGCD | rs2569027   | chr5:155,135,063-156,194,798 | AX-41643715  |
| SGCD | rs62383761  | chr5:155,135,063-156,194,798 | AX-14941707  |
| SGCD | rs2569026   | chr5:155,135,063-156,194,798 | AX-156282270 |
| SGCD | rs2569026   | chr5:155,135,063-156,194,798 | AX-156296927 |
| SGCD | rs2619719   | chr5:155,135,063-156,194,798 | AX-50448232  |
| SGCD | rs2619716   | chr5:155,135,063-156,194,798 | AX-14941713  |
| SGCD | rs77453483  | chr5:155,135,063-156,194,798 | AX-14941714  |
| SGCD | rs11738333  | chr5:155,135,063-156,194,798 | AX-11171692  |
| SGCD | rs974604    | chr5:155,135,063-156,194,798 | AX-107830826 |
| SGCD | rs974604    | chr5:155,135,063-156,194,798 | AX-156275477 |
| SGCD | rs6556779   | chr5:155,135,063-156,194,798 | AX-14941718  |
| SGCD | rs11738514  | chr5:155,135,063-156,194,798 | AX-14941719  |
| SGCD | rs61562015  | chr5:155,135,063-156,194,798 | AX-51103596  |
| SGCD | rs13357771  | chr5:155,135,063-156,194,798 | AX-11251129  |
| SGCD | rs2871580   | chr5:155,135,063-156,194,798 | AX-14941723  |
| SGCD | rs79646394  | chr5:155,135,063-156,194,798 | AX-14941725  |
| SGCD | rs112389596 | chr5:155,135,063-156,194,798 | AX-14941726  |
| SGCD | rs73299488  | chr5:155,135,063-156,194,798 | AX-156275478 |
| SGCD | rs73299488  | chr5:155,135,063-156,194,798 | AX-156292673 |
| SGCD | rs75445692  | chr5:155,135,063-156,194,798 | AX-156275479 |
| SGCD | rs75445692  | chr5:155,135,063-156,194,798 | AX-156292674 |
| SGCD | rs58739548  | chr5:155,135,063-156,194,798 | AX-156275480 |
| SGCD | rs58739548  | chr5:155,135,063-156,194,798 | AX-156292675 |
| SGCD | rs72814239  | chr5:155,135,063-156,194,798 | AX-148389301 |
| SGCD | rs72814239  | chr5:155,135,063-156,194,798 | AX-156275481 |
| SGCD | rs1594658   | chr5:155,135,063-156,194,798 | AX-14941734  |
| SGCD | rs11135369  | chr5:155,135,063-156,194,798 | AX-12408209  |

|      |             |                              |              |
|------|-------------|------------------------------|--------------|
| SGCD | rs76005690  | chr5:155,135,063-156,194,798 | AX-14941740  |
| SGCD | rs114955282 | chr5:155,135,063-156,194,798 | AX-148654490 |
| SGCD | rs114955282 | chr5:155,135,063-156,194,798 | AX-92656440  |
| SGCD | rs11745732  | chr5:155,135,063-156,194,798 | AX-123014279 |
| SGCD | rs11745732  | chr5:155,135,063-156,194,798 | AX-151269802 |
| SGCD | rs7378774   | chr5:155,135,063-156,194,798 | AX-11623499  |
| SGCD | rs13186927  | chr5:155,135,063-156,194,798 | AX-114298487 |
| SGCD | rs13186927  | chr5:155,135,063-156,194,798 | AX-156282271 |
| SGCD | rs76817418  | chr5:155,135,063-156,194,798 | AX-38253923  |
| SGCD | rs80255077  | chr5:155,135,063-156,194,798 | AX-14941749  |
| SGCD | rs73810324  | chr5:155,135,063-156,194,798 | AX-14941750  |
| SGCD | rs114019818 | chr5:155,135,063-156,194,798 | AX-14941751  |
| SGCD | rs244964    | chr5:155,135,063-156,194,798 | AX-11392722  |
| SGCD | rs34557688  | chr5:155,135,063-156,194,798 | AX-107844361 |
| SGCD | rs4444953   | chr5:155,135,063-156,194,798 | AX-156275482 |
| SGCD | rs4444953   | chr5:155,135,063-156,194,798 | AX-156292676 |
| SGCD | rs7726529   | chr5:155,135,063-156,194,798 | AX-11641420  |
| SGCD | rs244963    | chr5:155,135,063-156,194,798 | AX-14941758  |
| SGCD | rs73299493  | chr5:155,135,063-156,194,798 | AX-14941761  |
| SGCD | rs165952    | chr5:155,135,063-156,194,798 | AX-112918852 |
| SGCD | rs165952    | chr5:155,135,063-156,194,798 | AX-113475548 |
| SGCD | rs244962    | chr5:155,135,063-156,194,798 | AX-14941762  |
| SGCD | rs13436254  | chr5:155,135,063-156,194,798 | AX-41643731  |
| SGCD | rs73299497  | chr5:155,135,063-156,194,798 | AX-14941763  |
| SGCD | rs10056344  | chr5:155,135,063-156,194,798 | AX-148735220 |
| SGCD | rs10056344  | chr5:155,135,063-156,194,798 | AX-156275483 |
| SGCD | rs10065329  | chr5:155,135,063-156,194,798 | AX-148734828 |
| SGCD | rs10065329  | chr5:155,135,063-156,194,798 | AX-156275484 |
| SGCD | rs78995376  | chr5:155,135,063-156,194,798 | AX-35168345  |
| SGCD | rs10069258  | chr5:155,135,063-156,194,798 | AX-12380333  |
| SGCD | rs244961    | chr5:155,135,063-156,194,798 | AX-11392719  |
| SGCD | rs10058373  | chr5:155,135,063-156,194,798 | AX-14941766  |
| SGCD | rs244994    | chr5:155,135,063-156,194,798 | AX-35168349  |
| SGCD | rs1368326   | chr5:155,135,063-156,194,798 | AX-156275485 |
| SGCD | rs112514185 | chr5:155,135,063-156,194,798 | AX-38253927  |
| SGCD | rs244992    | chr5:155,135,063-156,194,798 | AX-50448237  |
| SGCD | rs17617120  | chr5:155,135,063-156,194,798 | AX-14941771  |
| SGCD | rs165953    | chr5:155,135,063-156,194,798 | AX-14941774  |
| SGCD | rs78541968  | chr5:155,135,063-156,194,798 | AX-14941775  |
| SGCD | rs200008053 | chr5:155,135,063-156,194,798 | AX-156285204 |
| SGCD | rs75894122  | chr5:155,135,063-156,194,798 | AX-14941778  |
| SGCD | rs1432723   | chr5:155,135,063-156,194,798 | AX-12463191  |
| SGCD | rs67625007  | chr5:155,135,063-156,194,798 | AX-14941782  |
| SGCD | rs6866337   | chr5:155,135,063-156,194,798 | AX-96749277  |
| SGCD | rs4526088   | chr5:155,135,063-156,194,798 | AX-156282272 |
| SGCD | rs4526088   | chr5:155,135,063-156,194,798 | AX-156296928 |
| SGCD | rs6874597   | chr5:155,135,063-156,194,798 | AX-41643739  |
| SGCD | rs244991    | chr5:155,135,063-156,194,798 | AX-14941787  |
| SGCD | rs244990    | chr5:155,135,063-156,194,798 | AX-156275487 |
| SGCD | rs1432721   | chr5:155,135,063-156,194,798 | AX-11263058  |
| SGCD | rs244989    | chr5:155,135,063-156,194,798 | AX-14941792  |
| SGCD | rs244988    | chr5:155,135,063-156,194,798 | AX-14941793  |
| SGCD | rs5016818   | chr5:155,135,063-156,194,798 | AX-11541377  |
| SGCD | rs74545702  | chr5:155,135,063-156,194,798 | AX-14941796  |
| SGCD | rs4704822   | chr5:155,135,063-156,194,798 | AX-156275488 |

|      |             |                              |              |
|------|-------------|------------------------------|--------------|
| SGCD | rs4704822   | chr5:155,135,063-156,194,798 | AX-156292679 |
| SGCD | rs34028424  | chr5:155,135,063-156,194,798 | AX-153245929 |
| SGCD | rs34028424  | chr5:155,135,063-156,194,798 | AX-156284182 |
| SGCD | rs4502799   | chr5:155,135,063-156,194,798 | AX-156275489 |
| SGCD | rs4502799   | chr5:155,135,063-156,194,798 | AX-156292680 |
| SGCD | rs244986    | chr5:155,135,063-156,194,798 | AX-156275490 |
| SGCD | rs244985    | chr5:155,135,063-156,194,798 | AX-148070582 |
| SGCD | rs244985    | chr5:155,135,063-156,194,798 | AX-156275491 |
| SGCD | rs10475521  | chr5:155,135,063-156,194,798 | AX-153356931 |
| SGCD | rs10475521  | chr5:155,135,063-156,194,798 | AX-156275492 |
| SGCD | rs244984    | chr5:155,135,063-156,194,798 | AX-156275493 |
| SGCD | rs244983    | chr5:155,135,063-156,194,798 | AX-112918853 |
| SGCD | rs244983    | chr5:155,135,063-156,194,798 | AX-113475549 |
| SGCD | rs78472029  | chr5:155,135,063-156,194,798 | AX-35168387  |
| SGCD | rs244982    | chr5:155,135,063-156,194,798 | AX-11392726  |
| SGCD | rs2116739   | chr5:155,135,063-156,194,798 | AX-12517761  |
| SGCD | rs75309704  | chr5:155,135,063-156,194,798 | AX-14941804  |
| SGCD | rs78326014  | chr5:155,135,063-156,194,798 | AX-14941805  |
| SGCD | rs244980    | chr5:155,135,063-156,194,798 | AX-35168393  |
| SGCD | rs679660    | chr5:155,135,063-156,194,798 | AX-148307011 |
| SGCD | rs679660    | chr5:155,135,063-156,194,798 | AX-156268160 |
| SGCD | rs679656    | chr5:155,135,063-156,194,798 | AX-121346847 |
| SGCD | rs679656    | chr5:155,135,063-156,194,798 | AX-156282273 |
| SGCD | rs244979    | chr5:155,135,063-156,194,798 | AX-14941806  |
| SGCD | rs11739086  | chr5:155,135,063-156,194,798 | AX-11171755  |
| SGCD | rs112157476 | chr5:155,135,063-156,194,798 | AX-156282274 |
| SGCD | rs112157476 | chr5:155,135,063-156,194,798 | AX-156296929 |
| SGCD | rs17533269  | chr5:155,135,063-156,194,798 | AX-14941813  |
| SGCD | rs79576243  | chr5:155,135,063-156,194,798 | AX-14941814  |
| SGCD | rs244978    | chr5:155,135,063-156,194,798 | AX-14941816  |
| SGCD | rs79109423  | chr5:155,135,063-156,194,798 | AX-14941817  |
| SGCD | rs76989382  | chr5:155,135,063-156,194,798 | AX-35168401  |
| SGCD | rs7733552   | chr5:155,135,063-156,194,798 | AX-14941819  |
| SGCD | rs244977    | chr5:155,135,063-156,194,798 | AX-14941820  |
| SGCD | rs17617422  | chr5:155,135,063-156,194,798 | AX-11331475  |
| SGCD | rs73301325  | chr5:155,135,063-156,194,798 | AX-35168409  |
| SGCD | rs73301328  | chr5:155,135,063-156,194,798 | AX-14941823  |
| SGCD | rs9313417   | chr5:155,135,063-156,194,798 | AX-41643767  |
| SGCD | rs244976    | chr5:155,135,063-156,194,798 | AX-14941827  |
| SGCD | rs74295103  | chr5:155,135,063-156,194,798 | AX-35168415  |
| SGCD | rs183626    | chr5:155,135,063-156,194,798 | AX-11346300  |
| SGCD | rs73810342  | chr5:155,135,063-156,194,798 | AX-14941839  |
| SGCD | rs17533521  | chr5:155,135,063-156,194,798 | AX-14941840  |
| SGCD | rs111337309 | chr5:155,135,063-156,194,798 | AX-120142057 |
| SGCD | rs111337309 | chr5:155,135,063-156,194,798 | AX-156284053 |
| SGCD | rs6897920   | chr5:155,135,063-156,194,798 | AX-156268161 |
| SGCD | rs6897920   | chr5:155,135,063-156,194,798 | AX-156288022 |
| SGCD | rs73810343  | chr5:155,135,063-156,194,798 | AX-14941843  |
| SGCD | rs13358188  | chr5:155,135,063-156,194,798 | AX-11251142  |
| SGCD | rs1157296   | chr5:155,135,063-156,194,798 | AX-156282275 |
| SGCD | rs1157296   | chr5:155,135,063-156,194,798 | AX-156296930 |
| SGCD | rs244972    | chr5:155,135,063-156,194,798 | AX-11392723  |
| SGCD | rs73810344  | chr5:155,135,063-156,194,798 | AX-14941845  |
| SGCD | rs17052958  | chr5:155,135,063-156,194,798 | AX-14941846  |
| SGCD | rs114338836 | chr5:155,135,063-156,194,798 | AX-14941847  |



|      |             |                              |              |
|------|-------------|------------------------------|--------------|
| SGCD | rs1864956   | chr5:155,135,063-156,194,798 | AX-11347992  |
| SGCD | rs72805670  | chr5:155,135,063-156,194,798 | AX-14941850  |
| SGCD | rs185281529 | chr5:155,135,063-156,194,798 | AX-156268162 |
| SGCD | rs185281529 | chr5:155,135,063-156,194,798 | AX-156288023 |
| SGCD | rs144994629 | chr5:155,135,063-156,194,798 | AX-121242826 |
| SGCD | rs144994629 | chr5:155,135,063-156,194,798 | AX-156285991 |
| SGCD | rs142789681 | chr5:155,135,063-156,194,798 | AX-148736991 |
| SGCD | rs142789681 | chr5:155,135,063-156,194,798 | AX-156284054 |
| SGCD | rs57169797  | chr5:155,135,063-156,194,798 | AX-148798752 |
| SGCD | rs34361546  | chr5:155,135,063-156,194,798 | AX-14941853  |
| SGCD | rs7724912   | chr5:155,135,063-156,194,798 | AX-12638285  |
| SGCD | rs17052965  | chr5:155,135,063-156,194,798 | AX-12487857  |
| SGCD | rs4400109   | chr5:155,135,063-156,194,798 | AX-11504113  |
| SGCD | rs61533738  | chr5:155,135,063-156,194,798 | AX-14941856  |
| SGCD | rs244966    | chr5:155,135,063-156,194,798 | AX-14941858  |
| SGCD | rs1432734   | chr5:155,135,063-156,194,798 | AX-11263059  |
| SGCD | rs1432813   | chr5:155,135,063-156,194,798 | AX-12463196  |
| SGCD | rs10515731  | chr5:155,135,063-156,194,798 | AX-12392985  |
| SGCD | rs17052977  | chr5:155,135,063-156,194,798 | AX-41643781  |
| SGCD | rs56356229  | chr5:155,135,063-156,194,798 | AX-121138418 |
| SGCD | rs56356229  | chr5:155,135,063-156,194,798 | AX-156284055 |
| SGCD | rs111327524 | chr5:155,135,063-156,194,798 | AX-148724082 |
| SGCD | rs111327524 | chr5:155,135,063-156,194,798 | AX-148873132 |
| SGCD | rs3097823   | chr5:155,135,063-156,194,798 | AX-105153806 |
| SGCD | rs3097823   | chr5:155,135,063-156,194,798 | AX-148177649 |
| SGCD | rs55711130  | chr5:155,135,063-156,194,798 | AX-156275494 |
| SGCD | rs55711130  | chr5:155,135,063-156,194,798 | AX-156292682 |
| SGCD | rs3097822   | chr5:155,135,063-156,194,798 | AX-35168433  |
| SGCD | rs3097813   | chr5:155,135,063-156,194,798 | AX-11433409  |
| SGCD | rs3097821   | chr5:155,135,063-156,194,798 | AX-156268163 |
| SGCD | rs3097821   | chr5:155,135,063-156,194,798 | AX-156288024 |
| SGCD | rs34689423  | chr5:155,135,063-156,194,798 | AX-35168435  |
| SGCD | rs244955    | chr5:155,135,063-156,194,798 | AX-12529541  |
| SGCD | rs1073677   | chr5:155,135,063-156,194,798 | AX-156268164 |
| SGCD | rs1073677   | chr5:155,135,063-156,194,798 | AX-156288025 |
| SGCD | rs112260325 | chr5:155,135,063-156,194,798 | AX-94368155  |
| SGCD | rs1594655   | chr5:155,135,063-156,194,798 | AX-35168443  |
| SGCD | rs13169785  | chr5:155,135,063-156,194,798 | AX-148658284 |
| SGCD | rs13169785  | chr5:155,135,063-156,194,798 | AX-156268165 |
| SGCD | rs1432732   | chr5:155,135,063-156,194,798 | AX-156268166 |
| SGCD | rs1432732   | chr5:155,135,063-156,194,798 | AX-156288026 |
| SGCD | rs62380664  | chr5:155,135,063-156,194,798 | AX-14941868  |
| SGCD | rs244954    | chr5:155,135,063-156,194,798 | AX-14941869  |
| SGCD | rs4547913   | chr5:155,135,063-156,194,798 | AX-14941870  |
| SGCD | rs1368332   | chr5:155,135,063-156,194,798 | AX-11257027  |
| SGCD | rs11948388  | chr5:155,135,063-156,194,798 | AX-156268167 |
| SGCD | rs11948388  | chr5:155,135,063-156,194,798 | AX-156288027 |
| SGCD | rs11960137  | chr5:155,135,063-156,194,798 | AX-41643793  |
| SGCD | rs200393489 | chr5:155,135,063-156,194,798 | AX-122985259 |
| SGCD | rs200393489 | chr5:155,135,063-156,194,798 | AX-156285336 |
| SGCD | rs201548921 | chr5:155,135,063-156,194,798 | AX-105034234 |
| SGCD | rs201548921 | chr5:155,135,063-156,194,798 | AX-122703432 |
| SGCD | rs6555912   | chr5:155,135,063-156,194,798 | AX-14941878  |
| SGCD | rs573807246 | chr5:155,135,063-156,194,798 | AX-153382430 |
| SGCD | rs573807246 | chr5:155,135,063-156,194,798 | AX-156285477 |

|      |             |                              |              |
|------|-------------|------------------------------|--------------|
| SGCD | rs201044606 | chr5:155,135,063-156,194,798 | AX-156284956 |
| SGCD | rs7728169   | chr5:155,135,063-156,194,798 | AX-156282276 |
| SGCD | rs7728169   | chr5:155,135,063-156,194,798 | AX-156296931 |
| SGCD | rs430625    | chr5:155,135,063-156,194,798 | AX-156275495 |
| SGCD | rs430625    | chr5:155,135,063-156,194,798 | AX-156292683 |
| SGCD | rs244953    | chr5:155,135,063-156,194,798 | AX-41643813  |
| SGCD | rs4704858   | chr5:155,135,063-156,194,798 | AX-35168465  |
| SGCD | rs17052994  | chr5:155,135,063-156,194,798 | AX-14941886  |
| SGCD | rs2163746   | chr5:155,135,063-156,194,798 | AX-11371687  |
| SGCD | rs2008129   | chr5:155,135,063-156,194,798 | AX-35168467  |
| SGCD | rs4435847   | chr5:155,135,063-156,194,798 | AX-35168469  |
| SGCD | rs181741    | chr5:155,135,063-156,194,798 | AX-14941888  |
| SGCD | rs1368331   | chr5:155,135,063-156,194,798 | AX-14941890  |
| SGCD | rs62380666  | chr5:155,135,063-156,194,798 | AX-35168475  |
| SGCD | rs113476377 | chr5:155,135,063-156,194,798 | AX-94351405  |
| SGCD | rs78365975  | chr5:155,135,063-156,194,798 | AX-156286352 |
| SGCD | rs80177286  | chr5:155,135,063-156,194,798 | AX-14941894  |
| SGCD | rs17053001  | chr5:155,135,063-156,194,798 | AX-11301472  |
| SGCD | rs17053002  | chr5:155,135,063-156,194,798 | AX-14941896  |
| SGCD | rs165951    | chr5:155,135,063-156,194,798 | AX-14941898  |
| SGCD | rs244960    | chr5:155,135,063-156,194,798 | AX-41643823  |
| SGCD | rs244959    | chr5:155,135,063-156,194,798 | AX-12529542  |
| SGCD | rs244958    | chr5:155,135,063-156,194,798 | AX-11392715  |
| SGCD | rs244957    | chr5:155,135,063-156,194,798 | AX-156296932 |
| SGCD | rs244957    | chr5:155,135,063-156,194,798 | AX-84652510  |
| SGCD | rs4444954   | chr5:155,135,063-156,194,798 | AX-148483005 |
| SGCD | rs4444954   | chr5:155,135,063-156,194,798 | AX-156275496 |
| SGCD | rs244956    | chr5:155,135,063-156,194,798 | AX-120496405 |
| SGCD | rs244956    | chr5:155,135,063-156,194,798 | AX-148061978 |
| SGCD | rs80080561  | chr5:155,135,063-156,194,798 | AX-35168487  |
| SGCD | rs78131374  | chr5:155,135,063-156,194,798 | AX-156275497 |
| SGCD | rs147666530 | chr5:155,135,063-156,194,798 | AX-122841182 |
| SGCD | rs147666530 | chr5:155,135,063-156,194,798 | AX-156298435 |
| SGCD | rs75287098  | chr5:155,135,063-156,194,798 | AX-14941919  |
| SGCD | rs10475581  | chr5:155,135,063-156,194,798 | AX-14941922  |
| SGCD | rs13178470  | chr5:155,135,063-156,194,798 | AX-11243075  |
| SGCD | rs17053010  | chr5:155,135,063-156,194,798 | AX-35168501  |
| SGCD | rs17053011  | chr5:155,135,063-156,194,798 | AX-41643835  |
| SGCD | rs10515732  | chr5:155,135,063-156,194,798 | AX-14941924  |
| SGCD | rs74444839  | chr5:155,135,063-156,194,798 | AX-35168509  |
| SGCD | rs6556055   | chr5:155,135,063-156,194,798 | AX-14941926  |
| SGCD | rs76123169  | chr5:155,135,063-156,194,798 | AX-156268168 |
| SGCD | rs11743754  | chr5:155,135,063-156,194,798 | AX-35168517  |
| SGCD | rs9313627   | chr5:155,135,063-156,194,798 | AX-156268169 |
| SGCD | rs9313627   | chr5:155,135,063-156,194,798 | AX-156288029 |
| SGCD | rs77841783  | chr5:155,135,063-156,194,798 | AX-14941930  |
| SGCD | rs141461413 | chr5:155,135,063-156,194,798 | AX-122688346 |
| SGCD | rs112739409 | chr5:155,135,063-156,194,798 | AX-153330554 |
| SGCD | rs112739409 | chr5:155,135,063-156,194,798 | AX-156268170 |
| SGCD | rs75217931  | chr5:155,135,063-156,194,798 | AX-148435831 |
| SGCD | rs75217931  | chr5:155,135,063-156,194,798 | AX-156268171 |
| SGCD | ---         | chr5:155,135,063-156,194,798 | AX-14941931  |
| SGCD | rs10475595  | chr5:155,135,063-156,194,798 | AX-156268172 |
| SGCD | rs10475595  | chr5:155,135,063-156,194,798 | AX-86898949  |
| SGCD | rs4704874   | chr5:155,135,063-156,194,798 | AX-113570336 |

|      |             |                              |              |
|------|-------------|------------------------------|--------------|
| SGCD | rs4704874   | chr5:155,135,063-156,194,798 | AX-122371675 |
| SGCD | rs200260395 | chr5:155,135,063-156,194,798 | AX-105063689 |
| SGCD | rs4704876   | chr5:155,135,063-156,194,798 | AX-124389988 |
| SGCD | rs4704876   | chr5:155,135,063-156,194,798 | AX-124394252 |
| SGCD | rs74322565  | chr5:155,135,063-156,194,798 | AX-156268173 |
| SGCD | rs74322565  | chr5:155,135,063-156,194,798 | AX-156288030 |
| SGCD | rs4704878   | chr5:155,135,063-156,194,798 | AX-11519453  |
| SGCD | rs17053028  | chr5:155,135,063-156,194,798 | AX-41643851  |
| SGCD | rs73810354  | chr5:155,135,063-156,194,798 | AX-156288031 |
| SGCD | rs17053030  | chr5:155,135,063-156,194,798 | AX-14941937  |
| SGCD | rs10053345  | chr5:155,135,063-156,194,798 | AX-41643853  |
| SGCD | rs17053032  | chr5:155,135,063-156,194,798 | AX-14941938  |
| SGCD | rs17053035  | chr5:155,135,063-156,194,798 | AX-11301474  |
| SGCD | rs34147443  | chr5:155,135,063-156,194,798 | AX-35168525  |
| SGCD | rs4704880   | chr5:155,135,063-156,194,798 | AX-12578510  |
| SGCD | rs143284601 | chr5:155,135,063-156,194,798 | AX-120373450 |
| SGCD | rs78830942  | chr5:155,135,063-156,194,798 | AX-14941940  |
| SGCD | rs17053040  | chr5:155,135,063-156,194,798 | AX-11301475  |
| SGCD | rs56259673  | chr5:155,135,063-156,194,798 | AX-14941943  |
| SGCD | rs137941682 | chr5:155,135,063-156,194,798 | AX-153324416 |
| SGCD | rs137941682 | chr5:155,135,063-156,194,798 | AX-156298630 |
| SGCD | rs1432730   | chr5:155,135,063-156,194,798 | AX-156292684 |
| SGCD | rs6865706   | chr5:155,135,063-156,194,798 | AX-156275499 |
| SGCD | rs6865706   | chr5:155,135,063-156,194,798 | AX-156292685 |
| SGCD | rs17053050  | chr5:155,135,063-156,194,798 | AX-14941944  |
| SGCD | rs6894182   | chr5:155,135,063-156,194,798 | AX-156292686 |
| SGCD | rs6894361   | chr5:155,135,063-156,194,798 | AX-14941946  |
| SGCD | rs6870438   | chr5:155,135,063-156,194,798 | AX-12612613  |
| SGCD | rs6894695   | chr5:155,135,063-156,194,798 | AX-12613457  |
| SGCD | rs73810356  | chr5:155,135,063-156,194,798 | AX-14941949  |
| SGCD | rs73810357  | chr5:155,135,063-156,194,798 | AX-14941951  |
| SGCD | rs73301362  | chr5:155,135,063-156,194,798 | AX-35168533  |
| SGCD | rs78267523  | chr5:155,135,063-156,194,798 | AX-35168535  |
| SGCD | rs6556104   | chr5:155,135,063-156,194,798 | AX-11571727  |
| SGCD | ---         | chr5:155,135,063-156,194,798 | AX-11641740  |
| SGCD | rs201352882 | chr5:155,135,063-156,194,798 | AX-156285552 |
| SGCD | rs1368327   | chr5:155,135,063-156,194,798 | AX-14941957  |
| SGCD | rs1368328   | chr5:155,135,063-156,194,798 | AX-12460034  |
| SGCD | rs1368329   | chr5:155,135,063-156,194,798 | AX-11257026  |
| SGCD | rs1368330   | chr5:155,135,063-156,194,798 | AX-156292687 |
| SGCD | rs7711809   | chr5:155,135,063-156,194,798 | AX-156275502 |
| SGCD | rs7711809   | chr5:155,135,063-156,194,798 | AX-156292688 |
| SGCD | rs62380670  | chr5:155,135,063-156,194,798 | AX-156275503 |
| SGCD | rs7716740   | chr5:155,135,063-156,194,798 | AX-148300048 |
| SGCD | rs7716740   | chr5:155,135,063-156,194,798 | AX-156275504 |
| SGCD | rs11948724  | chr5:155,135,063-156,194,798 | AX-148074361 |
| SGCD | rs11948724  | chr5:155,135,063-156,194,798 | AX-156275505 |
| SGCD | rs11950822  | chr5:155,135,063-156,194,798 | AX-156292690 |
| SGCD | rs7727854   | chr5:155,135,063-156,194,798 | AX-156282277 |
| SGCD | rs4704884   | chr5:155,135,063-156,194,798 | AX-35168557  |
| SGCD | rs78679054  | chr5:155,135,063-156,194,798 | AX-14941968  |
| SGCD | rs6556145   | chr5:155,135,063-156,194,798 | AX-14941970  |
| SGCD | rs111786881 | chr5:155,135,063-156,194,798 | AX-14941972  |
| SGCD | rs10062650  | chr5:155,135,063-156,194,798 | AX-11090347  |
| SGCD | rs58299963  | chr5:155,135,063-156,194,798 | AX-14941976  |

|      |             |                              |              |
|------|-------------|------------------------------|--------------|
| SGCD | rs4704888   | chr5:155,135,063-156,194,798 | AX-41643867  |
| SGCD | rs28459094  | chr5:155,135,063-156,194,798 | AX-156275507 |
| SGCD | rs28459094  | chr5:155,135,063-156,194,798 | AX-156292691 |
| SGCD | rs28584510  | chr5:155,135,063-156,194,798 | AX-35168563  |
| SGCD | rs6886366   | chr5:155,135,063-156,194,798 | AX-156275508 |
| SGCD | rs10057754  | chr5:155,135,063-156,194,798 | AX-12379954  |
| SGCD | rs200474037 | chr5:155,135,063-156,194,798 | AX-156298608 |
| SGCD | rs34089031  | chr5:155,135,063-156,194,798 | AX-156298051 |
| SGCD | rs200930271 | chr5:155,135,063-156,194,798 | AX-153244179 |
| SGCD | rs200930271 | chr5:155,135,063-156,194,798 | AX-156297993 |
| SGCD | rs4704889   | chr5:155,135,063-156,194,798 | AX-14941981  |
| SGCD | rs4704890   | chr5:155,135,063-156,194,798 | AX-41643871  |
| SGCD | rs891912    | chr5:155,135,063-156,194,798 | AX-35168567  |
| SGCD | rs891911    | chr5:155,135,063-156,194,798 | AX-156275509 |
| SGCD | rs891911    | chr5:155,135,063-156,194,798 | AX-156292693 |
| SGCD | rs737307    | chr5:155,135,063-156,194,798 | AX-156292694 |
| SGCD | rs737306    | chr5:155,135,063-156,194,798 | AX-156275511 |
| SGCD | rs737306    | chr5:155,135,063-156,194,798 | AX-156292695 |
| SGCD | rs4704748   | chr5:155,135,063-156,194,798 | AX-35168573  |
| SGCD | rs4704749   | chr5:155,135,063-156,194,798 | AX-14941985  |
| SGCD | rs57370050  | chr5:155,135,063-156,194,798 | AX-14941986  |
| SGCD | rs113449211 | chr5:155,135,063-156,194,798 | AX-14941991  |
| SGCD | rs13187962  | chr5:155,135,063-156,194,798 | AX-11243529  |
| SGCD | rs56708228  | chr5:155,135,063-156,194,798 | AX-107834479 |
| SGCD | rs56708228  | chr5:155,135,063-156,194,798 | AX-156292696 |
| SGCD | rs72805699  | chr5:155,135,063-156,194,798 | AX-35168581  |
| SGCD | rs1991792   | chr5:155,135,063-156,194,798 | AX-41643877  |
| SGCD | rs17053068  | chr5:155,135,063-156,194,798 | AX-14941996  |
| SGCD | rs2033455   | chr5:155,135,063-156,194,798 | AX-41643879  |
| SGCD | rs10515733  | chr5:155,135,063-156,194,798 | AX-14942001  |
| SGCD | rs1432733   | chr5:155,135,063-156,194,798 | AX-14942005  |
| SGCD | rs11959572  | chr5:155,135,063-156,194,798 | AX-41643881  |
| SGCD | rs6556227   | chr5:155,135,063-156,194,798 | AX-41643883  |
| SGCD | rs6556228   | chr5:155,135,063-156,194,798 | AX-41643885  |
| SGCD | rs7735601   | chr5:155,135,063-156,194,798 | AX-41643887  |
| SGCD | rs1816399   | chr5:155,135,063-156,194,798 | AX-156275512 |
| SGCD | rs73301391  | chr5:155,135,063-156,194,798 | AX-35168593  |
| SGCD | rs13174879  | chr5:155,135,063-156,194,798 | AX-14942015  |
| SGCD | rs17053082  | chr5:155,135,063-156,194,798 | AX-11301481  |
| SGCD | rs6888324   | chr5:155,135,063-156,194,798 | AX-14942019  |
| SGCD | rs1036185   | chr5:155,135,063-156,194,798 | AX-11104920  |
| SGCD | rs10061798  | chr5:155,135,063-156,194,798 | AX-156275513 |
| SGCD | rs10061798  | chr5:155,135,063-156,194,798 | AX-156292698 |
| SGCD | rs10066451  | chr5:155,135,063-156,194,798 | AX-147795643 |
| SGCD | rs10066451  | chr5:155,135,063-156,194,798 | AX-147889525 |
| SGCD | rs61424805  | chr5:155,135,063-156,194,798 | AX-156275514 |
| SGCD | rs61424805  | chr5:155,135,063-156,194,798 | AX-156292699 |
| SGCD | rs1432726   | chr5:155,135,063-156,194,798 | AX-14942027  |
| SGCD | rs146618637 | chr5:155,135,063-156,194,798 | AX-121247768 |
| SGCD | rs146618637 | chr5:155,135,063-156,194,798 | AX-38253961  |
| SGCD | rs4704899   | chr5:155,135,063-156,194,798 | AX-14942029  |
| SGCD | rs75588262  | chr5:155,135,063-156,194,798 | AX-14942030  |
| SGCD | rs11743064  | chr5:155,135,063-156,194,798 | AX-14942034  |
| SGCD | rs11746342  | chr5:155,135,063-156,194,798 | AX-14942035  |
| SGCD | rs73301393  | chr5:155,135,063-156,194,798 | AX-14942037  |

|      |             |                              |              |
|------|-------------|------------------------------|--------------|
| SGCD | rs11135000  | chr5:155,135,063-156,194,798 | AX-14942039  |
| SGCD | rs2310879   | chr5:155,135,063-156,194,798 | AX-11384275  |
| SGCD | rs7736718   | chr5:155,135,063-156,194,798 | AX-41643905  |
| SGCD | rs1368333   | chr5:155,135,063-156,194,798 | AX-41643907  |
| SGCD | rs56167566  | chr5:155,135,063-156,194,798 | AX-14942042  |
| SGCD | rs13179859  | chr5:155,135,063-156,194,798 | AX-14942043  |
| SGCD | rs200311798 | chr5:155,135,063-156,194,798 | AX-121876463 |
| SGCD | rs35087560  | chr5:155,135,063-156,194,798 | AX-148080668 |
| SGCD | rs35087560  | chr5:155,135,063-156,194,798 | AX-156275515 |
| SGCD | rs112222682 | chr5:155,135,063-156,194,798 | AX-115158621 |
| SGCD | rs112222682 | chr5:155,135,063-156,194,798 | AX-156275516 |
| SGCD | rs34532809  | chr5:155,135,063-156,194,798 | AX-11448556  |
| SGCD | rs73810381  | chr5:155,135,063-156,194,798 | AX-14942051  |
| SGCD | rs144085692 | chr5:155,135,063-156,194,798 | AX-148722366 |
| SGCD | rs144085692 | chr5:155,135,063-156,194,798 | AX-156284056 |
| SGCD | rs4512121   | chr5:155,135,063-156,194,798 | AX-148159430 |
| SGCD | rs4551052   | chr5:155,135,063-156,194,798 | AX-148096460 |
| SGCD | rs958444    | chr5:155,135,063-156,194,798 | AX-41643911  |
| SGCD | rs112900707 | chr5:155,135,063-156,194,798 | AX-156278660 |
| SGCD | rs73810382  | chr5:155,135,063-156,194,798 | AX-14942053  |
| SGCD | rs2033456   | chr5:155,135,063-156,194,798 | AX-11361549  |
| SGCD | rs4704906   | chr5:155,135,063-156,194,798 | AX-41643913  |
| SGCD | rs71582126  | chr5:155,135,063-156,194,798 | AX-149961976 |
| SGCD | rs71582126  | chr5:155,135,063-156,194,798 | AX-92766389  |
| SGCD | rs66754916  | chr5:155,135,063-156,194,798 | AX-148363792 |
| SGCD | rs66754916  | chr5:155,135,063-156,194,798 | AX-156284057 |
| SGCD | rs142148901 | chr5:155,135,063-156,194,798 | AX-153390249 |
| SGCD | rs1123776   | chr5:155,135,063-156,194,798 | AX-35168629  |
| SGCD | rs17053091  | chr5:155,135,063-156,194,798 | AX-12487865  |
| SGCD | rs140489188 | chr5:155,135,063-156,194,798 | AX-153280625 |
| SGCD | rs140489188 | chr5:155,135,063-156,194,798 | AX-156298484 |
| SGCD | rs201998467 | chr5:155,135,063-156,194,798 | AX-153281055 |
| SGCD | rs13163399  | chr5:155,135,063-156,194,798 | AX-14942060  |
| SGCD | rs58134933  | chr5:155,135,063-156,194,798 | AX-14942061  |
| SGCD | rs7726727   | chr5:155,135,063-156,194,798 | AX-41643917  |
| SGCD | rs35176390  | chr5:155,135,063-156,194,798 | AX-14942063  |
| SGCD | rs17053098  | chr5:155,135,063-156,194,798 | AX-41643921  |
| SGCD | rs4704908   | chr5:155,135,063-156,194,798 | AX-156275518 |
| SGCD | rs4704763   | chr5:155,135,063-156,194,798 | AX-153260440 |
| SGCD | rs4704763   | chr5:155,135,063-156,194,798 | AX-156284058 |
| SGCD | rs17053102  | chr5:155,135,063-156,194,798 | AX-12487866  |
| SGCD | rs56267022  | chr5:155,135,063-156,194,798 | AX-14942070  |
| SGCD | rs1019921   | chr5:155,135,063-156,194,798 | AX-14942071  |
| SGCD | rs729518    | chr5:155,135,063-156,194,798 | AX-14942072  |
| SGCD | rs56184653  | chr5:155,135,063-156,194,798 | AX-14942073  |
| SGCD | rs35922649  | chr5:155,135,063-156,194,798 | AX-35168641  |
| SGCD | rs17053110  | chr5:155,135,063-156,194,798 | AX-11301485  |
| SGCD | rs10866706  | chr5:155,135,063-156,194,798 | AX-14942077  |
| SGCD | rs4704766   | chr5:155,135,063-156,194,798 | AX-156292701 |
| SGCD | rs56255014  | chr5:155,135,063-156,194,798 | AX-156282280 |
| SGCD | rs56255014  | chr5:155,135,063-156,194,798 | AX-156296936 |
| SGCD | rs13171665  | chr5:155,135,063-156,194,798 | AX-156296937 |
| SGCD | rs79375969  | chr5:155,135,063-156,194,798 | AX-14942081  |
| SGCD | rs61217176  | chr5:155,135,063-156,194,798 | AX-35168653  |
| SGCD | rs57123572  | chr5:155,135,063-156,194,798 | AX-14942085  |

|      |             |                              |              |
|------|-------------|------------------------------|--------------|
| SGCD | rs58060178  | chr5:155,135,063-156,194,798 | AX-35168659  |
| SGCD | rs75072411  | chr5:155,135,063-156,194,798 | AX-35168661  |
| SGCD | rs12519159  | chr5:155,135,063-156,194,798 | AX-35168663  |
| SGCD | rs6873515   | chr5:155,135,063-156,194,798 | AX-122148884 |
| SGCD | rs6873515   | chr5:155,135,063-156,194,798 | AX-156268175 |
| SGCD | rs6866134   | chr5:155,135,063-156,194,798 | AX-14942087  |
| SGCD | rs1432724   | chr5:155,135,063-156,194,798 | AX-14942089  |
| SGCD | rs1432725   | chr5:155,135,063-156,194,798 | AX-14942090  |
| SGCD | rs13176599  | chr5:155,135,063-156,194,798 | AX-14942092  |
| SGCD | rs58735899  | chr5:155,135,063-156,194,798 | AX-14942093  |
| SGCD | rs34424222  | chr5:155,135,063-156,194,798 | AX-14942094  |
| SGCD | rs12517364  | chr5:155,135,063-156,194,798 | AX-14942096  |
| SGCD | rs1864943   | chr5:155,135,063-156,194,798 | AX-11347988  |
| SGCD | rs6886073   | chr5:155,135,063-156,194,798 | AX-14942099  |
| SGCD | rs10059037  | chr5:155,135,063-156,194,798 | AX-149208323 |
| SGCD | rs137898073 | chr5:155,135,063-156,194,798 | AX-153348428 |
| SGCD | rs137898073 | chr5:155,135,063-156,194,798 | AX-156284824 |
| SGCD | rs35060941  | chr5:155,135,063-156,194,798 | AX-153287046 |
| SGCD | rs35060941  | chr5:155,135,063-156,194,798 | AX-156268176 |
| SGCD | rs201390010 | chr5:155,135,063-156,194,798 | AX-156285309 |
| SGCD | rs10064121  | chr5:155,135,063-156,194,798 | AX-98016436  |
| SGCD | rs57807656  | chr5:155,135,063-156,194,798 | AX-119470679 |
| SGCD | rs13175377  | chr5:155,135,063-156,194,798 | AX-156296938 |
| SGCD | rs10059344  | chr5:155,135,063-156,194,798 | AX-14942101  |
| SGCD | rs10061155  | chr5:155,135,063-156,194,798 | AX-12380068  |
| SGCD | rs35430862  | chr5:155,135,063-156,194,798 | AX-14942103  |
| SGCD | rs10040967  | chr5:155,135,063-156,194,798 | AX-11089017  |
| SGCD | rs10063307  | chr5:155,135,063-156,194,798 | AX-156268177 |
| SGCD | rs9313767   | chr5:155,135,063-156,194,798 | AX-14942110  |
| SGCD | rs9313768   | chr5:155,135,063-156,194,798 | AX-12656402  |
| SGCD | rs9313769   | chr5:155,135,063-156,194,798 | AX-156268178 |
| SGCD | rs9313769   | chr5:155,135,063-156,194,798 | AX-156288033 |
| SGCD | rs10068623  | chr5:155,135,063-156,194,798 | AX-14942116  |
| SGCD | ---         | chr5:155,135,063-156,194,798 | AX-153335648 |
| SGCD | rs10041446  | chr5:155,135,063-156,194,798 | AX-41643945  |
| SGCD | rs6873111   | chr5:155,135,063-156,194,798 | AX-156275521 |
| SGCD | rs6873111   | chr5:155,135,063-156,194,798 | AX-156292702 |
| SGCD | rs200807025 | chr5:155,135,063-156,194,798 | AX-153357656 |
| SGCD | rs200807025 | chr5:155,135,063-156,194,798 | AX-156298286 |
| SGCD | rs10042990  | chr5:155,135,063-156,194,798 | AX-41643947  |
| SGCD | rs12520821  | chr5:155,135,063-156,194,798 | AX-11212048  |
| SGCD | rs6892854   | chr5:155,135,063-156,194,798 | AX-41643949  |
| SGCD | rs6860532   | chr5:155,135,063-156,194,798 | AX-14942129  |
| SGCD | rs28639474  | chr5:155,135,063-156,194,798 | AX-35168683  |
| SGCD | rs10065181  | chr5:155,135,063-156,194,798 | AX-156275523 |
| SGCD | rs10065181  | chr5:155,135,063-156,194,798 | AX-156292704 |
| SGCD | rs1465687   | chr5:155,135,063-156,194,798 | AX-14942132  |
| SGCD | rs4565195   | chr5:155,135,063-156,194,798 | AX-92607130  |
| SGCD | rs4565195   | chr5:155,135,063-156,194,798 | AX-92665039  |
| SGCD | rs17053124  | chr5:155,135,063-156,194,798 | AX-35168689  |
| SGCD | rs4634337   | chr5:155,135,063-156,194,798 | AX-14942141  |
| SGCD | rs17053126  | chr5:155,135,063-156,194,798 | AX-41643953  |
| SGCD | rs4704918   | chr5:155,135,063-156,194,798 | AX-14942145  |
| SGCD | rs73810389  | chr5:155,135,063-156,194,798 | AX-156268179 |
| SGCD | rs73810389  | chr5:155,135,063-156,194,798 | AX-156288034 |

|      |             |                              |              |
|------|-------------|------------------------------|--------------|
| SGCD | rs73810390  | chr5:155,135,063-156,194,798 | AX-156268180 |
| SGCD | rs73810390  | chr5:155,135,063-156,194,798 | AX-156288035 |
| SGCD | rs73810391  | chr5:155,135,063-156,194,798 | AX-156268181 |
| SGCD | rs73810391  | chr5:155,135,063-156,194,798 | AX-156288036 |
| SGCD | rs73810392  | chr5:155,135,063-156,194,798 | AX-14942151  |
| SGCD | rs7717273   | chr5:155,135,063-156,194,798 | AX-14942152  |
| SGCD | rs7736205   | chr5:155,135,063-156,194,798 | AX-12638692  |
| SGCD | rs6887369   | chr5:155,135,063-156,194,798 | AX-153323726 |
| SGCD | rs6887369   | chr5:155,135,063-156,194,798 | AX-88323200  |
| SGCD | rs17053134  | chr5:155,135,063-156,194,798 | AX-11301489  |
| SGCD | rs10454973  | chr5:155,135,063-156,194,798 | AX-41643955  |
| SGCD | rs75993682  | chr5:155,135,063-156,194,798 | AX-14942162  |
| SGCD | rs73810394  | chr5:155,135,063-156,194,798 | AX-156282283 |
| SGCD | rs73810394  | chr5:155,135,063-156,194,798 | AX-156296939 |
| SGCD | rs79175999  | chr5:155,135,063-156,194,798 | AX-148561104 |
| SGCD | rs79175999  | chr5:155,135,063-156,194,798 | AX-156282284 |
| SGCD | rs200508172 | chr5:155,135,063-156,194,798 | AX-153333539 |
| SGCD | rs200508172 | chr5:155,135,063-156,194,798 | AX-156286305 |
| SGCD | rs11750885  | chr5:155,135,063-156,194,798 | AX-11172702  |
| SGCD | rs12521203  | chr5:155,135,063-156,194,798 | AX-156268182 |
| SGCD | rs12521203  | chr5:155,135,063-156,194,798 | AX-156288037 |
| SGCD | rs4704921   | chr5:155,135,063-156,194,798 | AX-41643959  |
| SGCD | rs73810395  | chr5:155,135,063-156,194,798 | AX-156268183 |
| SGCD | rs73810395  | chr5:155,135,063-156,194,798 | AX-156288038 |
| SGCD | rs73810396  | chr5:155,135,063-156,194,798 | AX-35168709  |
| SGCD | rs73810397  | chr5:155,135,063-156,194,798 | AX-14942170  |
| SGCD | rs10454961  | chr5:155,135,063-156,194,798 | AX-14942172  |
| SGCD | rs112455027 | chr5:155,135,063-156,194,798 | AX-156284059 |
| SGCD | rs57194836  | chr5:155,135,063-156,194,798 | AX-148588674 |
| SGCD | rs57194836  | chr5:155,135,063-156,194,798 | AX-156268184 |
| SGCD | rs17536262  | chr5:155,135,063-156,194,798 | AX-41643963  |
| SGCD | rs4704923   | chr5:155,135,063-156,194,798 | AX-41643965  |
| SGCD | rs76128112  | chr5:155,135,063-156,194,798 | AX-35168719  |
| SGCD | rs73810399  | chr5:155,135,063-156,194,798 | AX-14942179  |
| SGCD | rs35598606  | chr5:155,135,063-156,194,798 | AX-156286313 |
| SGCD | rs553748113 | chr5:155,135,063-156,194,798 | AX-121171048 |
| SGCD | rs553748113 | chr5:155,135,063-156,194,798 | AX-156285270 |
| SGCD | rs2053041   | chr5:155,135,063-156,194,798 | AX-14942185  |
| SGCD | rs17053140  | chr5:155,135,063-156,194,798 | AX-156275524 |
| SGCD | rs17053140  | chr5:155,135,063-156,194,798 | AX-156292705 |
| SGCD | rs256635    | chr5:155,135,063-156,194,798 | AX-12532084  |
| SGCD | rs73302947  | chr5:155,135,063-156,194,798 | AX-121625398 |
| SGCD | rs73302947  | chr5:155,135,063-156,194,798 | AX-156268185 |
| SGCD | rs73812911  | chr5:155,135,063-156,194,798 | AX-156282285 |
| SGCD | rs73812911  | chr5:155,135,063-156,194,798 | AX-156296940 |
| SGCD | rs17536506  | chr5:155,135,063-156,194,798 | AX-35168729  |
| SGCD | rs2163745   | chr5:155,135,063-156,194,798 | AX-35168731  |
| SGCD | rs5872451   | chr5:155,135,063-156,194,798 | AX-153234175 |
| SGCD | rs5872451   | chr5:155,135,063-156,194,798 | AX-156298109 |
| SGCD | rs2116737   | chr5:155,135,063-156,194,798 | AX-11368325  |
| SGCD | rs2436421   | chr5:155,135,063-156,194,798 | AX-11392021  |
| SGCD | rs2436420   | chr5:155,135,063-156,194,798 | AX-14942195  |
| SGCD | rs5872452   | chr5:155,135,063-156,194,798 | AX-107799226 |
| SGCD | rs5872452   | chr5:155,135,063-156,194,798 | AX-156297698 |
| SGCD | rs1432727   | chr5:155,135,063-156,194,798 | AX-14942199  |

|      |             |                              |              |
|------|-------------|------------------------------|--------------|
| SGCD | rs256634    | chr5:155,135,063-156,194,798 | AX-14942200  |
| SGCD | rs256633    | chr5:155,135,063-156,194,798 | AX-35168735  |
| SGCD | rs10037831  | chr5:155,135,063-156,194,798 | AX-35168737  |
| SGCD | rs256632    | chr5:155,135,063-156,194,798 | AX-148035227 |
| SGCD | rs256632    | chr5:155,135,063-156,194,798 | AX-96622694  |
| SGCD | rs17536707  | chr5:155,135,063-156,194,798 | AX-11328097  |
| SGCD | rs70981995  | chr5:155,135,063-156,194,798 | AX-153375030 |
| SGCD | rs70981995  | chr5:155,135,063-156,194,798 | AX-156297955 |
| SGCD | rs73812913  | chr5:155,135,063-156,194,798 | AX-14942206  |
| SGCD | rs3097811   | chr5:155,135,063-156,194,798 | AX-14942208  |
| SGCD | rs3097811   | chr5:155,135,063-156,194,798 | AX-156292706 |
| SGCD | rs7721978   | chr5:155,135,063-156,194,798 | AX-14942209  |
| SGCD | rs7707208   | chr5:155,135,063-156,194,798 | AX-14942210  |
| SGCD | rs256631    | chr5:155,135,063-156,194,798 | AX-11398771  |
| SGCD | rs256630    | chr5:155,135,063-156,194,798 | AX-35168739  |
| SGCD | rs7734472   | chr5:155,135,063-156,194,798 | AX-35168741  |
| SGCD | rs256629    | chr5:155,135,063-156,194,798 | AX-14942213  |
| SGCD | rs256628    | chr5:155,135,063-156,194,798 | AX-35168743  |
| SGCD | rs10053395  | chr5:155,135,063-156,194,798 | AX-11089766  |
| SGCD | rs4704934   | chr5:155,135,063-156,194,798 | AX-41643973  |
| SGCD | rs256627    | chr5:155,135,063-156,194,798 | AX-14942215  |
| SGCD | rs4704935   | chr5:155,135,063-156,194,798 | AX-14942217  |
| SGCD | rs77495425  | chr5:155,135,063-156,194,798 | AX-14942219  |
| SGCD | rs256626    | chr5:155,135,063-156,194,798 | AX-156275525 |
| SGCD | rs3097812   | chr5:155,135,063-156,194,798 | AX-156275526 |
| SGCD | rs3097812   | chr5:155,135,063-156,194,798 | AX-156292708 |
| SGCD | rs78882754  | chr5:155,135,063-156,194,798 | AX-14942222  |
| SGCD | rs256625    | chr5:155,135,063-156,194,798 | AX-14942223  |
| SGCD | rs1347116   | chr5:155,135,063-156,194,798 | AX-156275527 |
| SGCD | rs1347116   | chr5:155,135,063-156,194,798 | AX-156292709 |
| SGCD | ---         | chr5:155,135,063-156,194,798 | AX-124391297 |
| SGCD | ---         | chr5:155,135,063-156,194,798 | AX-124392138 |
| SGCD | rs6862821   | chr5:155,135,063-156,194,798 | AX-12612345  |
| SGCD | rs77818256  | chr5:155,135,063-156,194,798 | AX-156275528 |
| SGCD | rs77818256  | chr5:155,135,063-156,194,798 | AX-156292710 |
| SGCD | rs3097855   | chr5:155,135,063-156,194,798 | AX-11433416  |
| SGCD | rs73812915  | chr5:155,135,063-156,194,798 | AX-14942226  |
| SGCD | rs7724181   | chr5:155,135,063-156,194,798 | AX-156275529 |
| SGCD | rs7724181   | chr5:155,135,063-156,194,798 | AX-156292711 |
| SGCD | rs7701517   | chr5:155,135,063-156,194,798 | AX-41643981  |
| SGCD | rs1432728   | chr5:155,135,063-156,194,798 | AX-156282286 |
| SGCD | rs77079151  | chr5:155,135,063-156,194,798 | AX-14942227  |
| SGCD | rs1002844   | chr5:155,135,063-156,194,798 | AX-156275530 |
| SGCD | rs1002844   | chr5:155,135,063-156,194,798 | AX-156292712 |
| SGCD | rs77825574  | chr5:155,135,063-156,194,798 | AX-156268186 |
| SGCD | rs77825574  | chr5:155,135,063-156,194,798 | AX-156288039 |
| SGCD | rs17537018  | chr5:155,135,063-156,194,798 | AX-14942230  |
| SGCD | rs74742493  | chr5:155,135,063-156,194,798 | AX-35168763  |
| SGCD | rs113793267 | chr5:155,135,063-156,194,798 | AX-156284060 |
| SGCD | rs10065929  | chr5:155,135,063-156,194,798 | AX-148200314 |
| SGCD | rs10065929  | chr5:155,135,063-156,194,798 | AX-92605374  |
| SGCD | rs112468444 | chr5:155,135,063-156,194,798 | AX-90039556  |
| SGCD | rs111632521 | chr5:155,135,063-156,194,798 | AX-14942235  |
| SGCD | rs10475659  | chr5:155,135,063-156,194,798 | AX-156268187 |
| SGCD | rs12188985  | chr5:155,135,063-156,194,798 | AX-147826306 |



|      |             |                              |              |
|------|-------------|------------------------------|--------------|
| SGCD | rs12188985  | chr5:155,135,063-156,194,798 | AX-147920302 |
| SGCD | rs61191718  | chr5:155,135,063-156,194,798 | AX-148259179 |
| SGCD | rs61191718  | chr5:155,135,063-156,194,798 | AX-156268188 |
| SGCD | rs116560833 | chr5:155,135,063-156,194,798 | AX-153174190 |
| SGCD | rs116560833 | chr5:155,135,063-156,194,798 | AX-156288040 |
| SGCD | rs2116738   | chr5:155,135,063-156,194,798 | AX-12517760  |
| SGCD | rs1002843   | chr5:155,135,063-156,194,798 | AX-156268189 |
| SGCD | rs1002843   | chr5:155,135,063-156,194,798 | AX-156288041 |
| SGCD | rs9687494   | chr5:155,135,063-156,194,798 | AX-14942244  |
| SGCD | rs58209951  | chr5:155,135,063-156,194,798 | AX-14942245  |
| SGCD | rs1347118   | chr5:155,135,063-156,194,798 | AX-11254943  |
| SGCD | rs142239333 | chr5:155,135,063-156,194,798 | AX-94351406  |
| SGCD | rs75174473  | chr5:155,135,063-156,194,798 | AX-14942246  |
| SGCD | rs992563    | chr5:155,135,063-156,194,798 | AX-156268190 |
| SGCD | rs992563    | chr5:155,135,063-156,194,798 | AX-156288042 |
| SGCD | rs79681499  | chr5:155,135,063-156,194,798 | AX-156283253 |
| SGCD | rs79681499  | chr5:155,135,063-156,194,798 | AX-156297611 |
| SGCD | rs75842661  | chr5:155,135,063-156,194,798 | AX-156282287 |
| SGCD | rs75842661  | chr5:155,135,063-156,194,798 | AX-156296942 |
| SGCD | rs79707962  | chr5:155,135,063-156,194,798 | AX-14942248  |
| SGCD | rs78054006  | chr5:155,135,063-156,194,798 | AX-35168779  |
| SGCD | rs58327079  | chr5:155,135,063-156,194,798 | AX-14942249  |
| SGCD | rs73812917  | chr5:155,135,063-156,194,798 | AX-35168781  |
| SGCD | rs58982831  | chr5:155,135,063-156,194,798 | AX-35168789  |
| SGCD | rs140235000 | chr5:155,135,063-156,194,798 | AX-107801617 |
| SGCD | rs78866105  | chr5:155,135,063-156,194,798 | AX-14942258  |
| SGCD | rs4601027   | chr5:155,135,063-156,194,798 | AX-14942261  |
| SGCD | rs17537158  | chr5:155,135,063-156,194,798 | AX-14942263  |
| SGCD | rs7736045   | chr5:155,135,063-156,194,798 | AX-14942266  |
| SGCD | rs73812919  | chr5:155,135,063-156,194,798 | AX-156268191 |
| SGCD | rs4704943   | chr5:155,135,063-156,194,798 | AX-11519462  |
| SGCD | rs111618151 | chr5:155,135,063-156,194,798 | AX-153303921 |
| SGCD | rs111618151 | chr5:155,135,063-156,194,798 | AX-156284365 |
| SGCD | rs77005236  | chr5:155,135,063-156,194,798 | AX-14942269  |
| SGCD | rs73812920  | chr5:155,135,063-156,194,798 | AX-14942271  |
| SGCD | rs6556352   | chr5:155,135,063-156,194,798 | AX-11571748  |
| SGCD | rs6897824   | chr5:155,135,063-156,194,798 | AX-156282288 |
| SGCD | rs6897824   | chr5:155,135,063-156,194,798 | AX-156296943 |
| SGCD | rs77732553  | chr5:155,135,063-156,194,798 | AX-14942272  |
| SGCD | rs73812922  | chr5:155,135,063-156,194,798 | AX-35168801  |
| SGCD | rs73812923  | chr5:155,135,063-156,194,798 | AX-35168803  |
| SGCD | rs74871824  | chr5:155,135,063-156,194,798 | AX-14942274  |
| SGCD | rs4418084   | chr5:155,135,063-156,194,798 | AX-14942277  |
| SGCD | rs56347212  | chr5:155,135,063-156,194,798 | AX-14942278  |
| SGCD | rs79834561  | chr5:155,135,063-156,194,798 | AX-14942279  |
| SGCD | rs6556357   | chr5:155,135,063-156,194,798 | AX-156275531 |
| SGCD | rs6556357   | chr5:155,135,063-156,194,798 | AX-156292713 |
| SGCD | rs77691983  | chr5:155,135,063-156,194,798 | AX-14942280  |
| SGCD | rs12658158  | chr5:155,135,063-156,194,798 | AX-156288044 |
| SGCD | rs12658158  | chr5:155,135,063-156,194,798 | AX-75176545  |
| SGCD | rs113792361 | chr5:155,135,063-156,194,798 | AX-156268192 |
| SGCD | rs113792361 | chr5:155,135,063-156,194,798 | AX-156288045 |
| SGCD | rs72643425  | chr5:155,135,063-156,194,798 | AX-148427644 |
| SGCD | rs11949606  | chr5:155,135,063-156,194,798 | AX-121737800 |
| SGCD | rs11949606  | chr5:155,135,063-156,194,798 | AX-148204370 |

|      |             |                              |              |
|------|-------------|------------------------------|--------------|
| SGCD | rs112211079 | chr5:155,135,063-156,194,798 | AX-148466823 |
| SGCD | rs112211079 | chr5:155,135,063-156,194,798 | AX-96844849  |
| SGCD | rs111762202 | chr5:155,135,063-156,194,798 | AX-96568231  |
| SGCD | rs149801030 | chr5:155,135,063-156,194,798 | AX-119774592 |
| SGCD | rs149801030 | chr5:155,135,063-156,194,798 | AX-95862812  |
| SGCD | rs4434366   | chr5:155,135,063-156,194,798 | AX-151137166 |
| SGCD | rs4434366   | chr5:155,135,063-156,194,798 | AX-153337087 |
| SGCD | rs11742181  | chr5:155,135,063-156,194,798 | AX-35168817  |
| SGCD | rs111875875 | chr5:155,135,063-156,194,798 | AX-156288046 |
| SGCD | rs80115108  | chr5:155,135,063-156,194,798 | AX-14942285  |
| SGCD | rs998999    | chr5:155,135,063-156,194,798 | AX-156282289 |
| SGCD | rs998999    | chr5:155,135,063-156,194,798 | AX-156296944 |
| SGCD | rs998997    | chr5:155,135,063-156,194,798 | AX-50448280  |
| SGCD | rs4273589   | chr5:155,135,063-156,194,798 | AX-156296945 |
| SGCD | ---         | chr5:155,135,063-156,194,798 | AX-14942288  |
| SGCD | rs6897778   | chr5:155,135,063-156,194,798 | AX-107723642 |
| SGCD | rs6897778   | chr5:155,135,063-156,194,798 | AX-156268195 |
| SGCD | rs6874329   | chr5:155,135,063-156,194,798 | AX-156268196 |
| SGCD | rs6874329   | chr5:155,135,063-156,194,798 | AX-156288047 |
| SGCD | rs74699963  | chr5:155,135,063-156,194,798 | AX-156296946 |
| SGCD | rs77332121  | chr5:155,135,063-156,194,798 | AX-156282292 |
| SGCD | rs77332121  | chr5:155,135,063-156,194,798 | AX-156296947 |
| SGCD | rs112068414 | chr5:155,135,063-156,194,798 | AX-148581181 |
| SGCD | rs201283942 | chr5:155,135,063-156,194,798 | AX-153377574 |
| SGCD | rs201283942 | chr5:155,135,063-156,194,798 | AX-156298267 |
| SGCD | rs13356726  | chr5:155,135,063-156,194,798 | AX-156282293 |
| SGCD | rs13356726  | chr5:155,135,063-156,194,798 | AX-156296948 |
| SGCD | rs6890777   | chr5:155,135,063-156,194,798 | AX-148388488 |
| SGCD | rs78761615  | chr5:155,135,063-156,194,798 | AX-14942294  |
| SGCD | rs4478303   | chr5:155,135,063-156,194,798 | AX-88821090  |
| SGCD | rs4478303   | chr5:155,135,063-156,194,798 | AX-88821336  |
| SGCD | rs114926289 | chr5:155,135,063-156,194,798 | AX-156275532 |
| SGCD | rs114926289 | chr5:155,135,063-156,194,798 | AX-156292714 |
| SGCD | rs80281125  | chr5:155,135,063-156,194,798 | AX-50448281  |
| SGCD | rs74921733  | chr5:155,135,063-156,194,798 | AX-14942298  |
| SGCD | rs75991905  | chr5:155,135,063-156,194,798 | AX-156275533 |
| SGCD | rs75991905  | chr5:155,135,063-156,194,798 | AX-156292715 |
| SGCD | rs59005460  | chr5:155,135,063-156,194,798 | AX-153298366 |
| SGCD | rs59005460  | chr5:155,135,063-156,194,798 | AX-156284598 |
| SGCD | rs66652710  | chr5:155,135,063-156,194,798 | AX-156275534 |
| SGCD | rs66652710  | chr5:155,135,063-156,194,798 | AX-156292716 |
| SGCD | rs75332980  | chr5:155,135,063-156,194,798 | AX-156275535 |
| SGCD | rs75332980  | chr5:155,135,063-156,194,798 | AX-156292717 |
| SGCD | rs76668083  | chr5:155,135,063-156,194,798 | AX-50448282  |
| SGCD | rs112774930 | chr5:155,135,063-156,194,798 | AX-153324140 |
| SGCD | rs112774930 | chr5:155,135,063-156,194,798 | AX-156286120 |
| SGCD | rs74809394  | chr5:155,135,063-156,194,798 | AX-156268197 |
| SGCD | rs74809394  | chr5:155,135,063-156,194,798 | AX-156288048 |
| SGCD | rs77498485  | chr5:155,135,063-156,194,798 | AX-156268198 |
| SGCD | rs77498485  | chr5:155,135,063-156,194,798 | AX-156288049 |
| SGCD | rs114572602 | chr5:155,135,063-156,194,798 | AX-156268199 |
| SGCD | rs114572602 | chr5:155,135,063-156,194,798 | AX-156288050 |
| SGCD | rs75776057  | chr5:155,135,063-156,194,798 | AX-156288051 |
| SGCD | rs10070956  | chr5:155,135,063-156,194,798 | AX-11090878  |
| SGCD | rs10069855  | chr5:155,135,063-156,194,798 | AX-156268201 |

|      |             |                              |              |
|------|-------------|------------------------------|--------------|
| SGCD | rs10069855  | chr5:155,135,063-156,194,798 | AX-156288052 |
| SGCD | rs140165378 | chr5:155,135,063-156,194,798 | AX-156284061 |
| SGCD | rs146691095 | chr5:155,135,063-156,194,798 | AX-148645853 |
| SGCD | rs146691095 | chr5:155,135,063-156,194,798 | AX-92736143  |
| SGCD | rs140303067 | chr5:155,135,063-156,194,798 | AX-156284062 |
| SGCD | rs140303067 | chr5:155,135,063-156,194,798 | AX-88326101  |
| SGCD | rs145210901 | chr5:155,135,063-156,194,798 | AX-148621924 |
| SGCD | rs145210901 | chr5:155,135,063-156,194,798 | AX-96811242  |
| SGCD | rs60166257  | chr5:155,135,063-156,194,798 | AX-156284063 |
| SGCD | rs187138699 | chr5:155,135,063-156,194,798 | AX-114042561 |
| SGCD | rs187138699 | chr5:155,135,063-156,194,798 | AX-121746832 |
| SGCD | rs112059885 | chr5:155,135,063-156,194,798 | AX-156284064 |
| SGCD | rs112059885 | chr5:155,135,063-156,194,798 | AX-96823234  |
| SGCD | rs10476268  | chr5:155,135,063-156,194,798 | AX-149468466 |
| SGCD | rs79970141  | chr5:155,135,063-156,194,798 | AX-148120680 |
| SGCD | rs79970141  | chr5:155,135,063-156,194,798 | AX-156284065 |
| SGCD | ---         | chr5:155,135,063-156,194,798 | AX-156282295 |
| SGCD | ---         | chr5:155,135,063-156,194,798 | AX-94365404  |
| SGCD | rs146119960 | chr5:155,135,063-156,194,798 | AX-119355262 |
| SGCD | rs146119960 | chr5:155,135,063-156,194,798 | AX-153310863 |
| SGCD | rs139257230 | chr5:155,135,063-156,194,798 | AX-11455855  |
| SGCD | rs139257230 | chr5:155,135,063-156,194,798 | AX-119419366 |
| SGCD | rs186408008 | chr5:155,135,063-156,194,798 | AX-114051243 |
| SGCD | rs186408008 | chr5:155,135,063-156,194,798 | AX-156284066 |
| SGCD | rs58659977  | chr5:155,135,063-156,194,798 | AX-153322647 |
| SGCD | rs146853940 | chr5:155,135,063-156,194,798 | AX-119289711 |
| SGCD | rs146853940 | chr5:155,135,063-156,194,798 | AX-92705994  |
| SGCD | rs140270015 | chr5:155,135,063-156,194,798 | AX-144909465 |
| SGCD | rs140270015 | chr5:155,135,063-156,194,798 | AX-148559325 |
| SGCD | rs4704964   | chr5:155,135,063-156,194,798 | AX-153326725 |
| SGCD | rs4704964   | chr5:155,135,063-156,194,798 | AX-156284067 |
| SGCD | rs4704965   | chr5:155,135,063-156,194,798 | AX-121414485 |
| SGCD | rs4704965   | chr5:155,135,063-156,194,798 | AX-153322417 |
| SGCD | rs150098057 | chr5:155,135,063-156,194,798 | AX-153333225 |
| SGCD | rs150098057 | chr5:155,135,063-156,194,798 | AX-156284068 |
| SGCD | rs138634965 | chr5:155,135,063-156,194,798 | AX-121410828 |
| SGCD | rs138634965 | chr5:155,135,063-156,194,798 | AX-156284069 |
| SGCD | rs141464147 | chr5:155,135,063-156,194,798 | AX-148623299 |
| SGCD | rs141464147 | chr5:155,135,063-156,194,798 | AX-96909537  |
| SGCD | rs146975160 | chr5:155,135,063-156,194,798 | AX-148513739 |
| SGCD | rs146975160 | chr5:155,135,063-156,194,798 | AX-148552220 |
| SGCD | rs188019253 | chr5:155,135,063-156,194,798 | AX-119739691 |
| SGCD | rs188019253 | chr5:155,135,063-156,194,798 | AX-151402722 |
| SGCD | rs144731242 | chr5:155,135,063-156,194,798 | AX-148588129 |
| SGCD | rs144731242 | chr5:155,135,063-156,194,798 | AX-156284070 |
| SGCD | rs10476272  | chr5:155,135,063-156,194,798 | AX-148205233 |
| SGCD | rs201713321 | chr5:155,135,063-156,194,798 | AX-153345547 |
| SGCD | rs201713321 | chr5:155,135,063-156,194,798 | AX-156286346 |
| SGCD | rs58999231  | chr5:155,135,063-156,194,798 | AX-153256556 |
| SGCD | rs58999231  | chr5:155,135,063-156,194,798 | AX-153293386 |
| SGCD | rs10476273  | chr5:155,135,063-156,194,798 | AX-119535993 |
| SGCD | rs150622703 | chr5:155,135,063-156,194,798 | AX-105036709 |
| SGCD | rs150622703 | chr5:155,135,063-156,194,798 | AX-156284071 |
| SGCD | rs10476274  | chr5:155,135,063-156,194,798 | AX-105112423 |
| SGCD | rs10476274  | chr5:155,135,063-156,194,798 | AX-156275536 |

|      |             |                              |              |
|------|-------------|------------------------------|--------------|
| SGCD | rs186521532 | chr5:155,135,063-156,194,798 | AX-148596262 |
| SGCD | rs140166559 | chr5:155,135,063-156,194,798 | AX-148597803 |
| SGCD | rs140166559 | chr5:155,135,063-156,194,798 | AX-96666029  |
| SGCD | rs73813227  | chr5:155,135,063-156,194,798 | AX-148557727 |
| SGCD | rs73813227  | chr5:155,135,063-156,194,798 | AX-156275537 |
| SGCD | rs12187915  | chr5:155,135,063-156,194,798 | AX-11194557  |
| SGCD | rs10476276  | chr5:155,135,063-156,194,798 | AX-41644037  |
| SGCD | rs75721459  | chr5:155,135,063-156,194,798 | AX-14942314  |
| SGCD | rs77171253  | chr5:155,135,063-156,194,798 | AX-14942315  |
| SGCD | rs77546817  | chr5:155,135,063-156,194,798 | AX-14942316  |
| SGCD | rs4704970   | chr5:155,135,063-156,194,798 | AX-11519465  |
| SGCD | rs78132702  | chr5:155,135,063-156,194,798 | AX-14942317  |
| SGCD | rs13157744  | chr5:155,135,063-156,194,798 | AX-58381248  |
| SGCD | rs73813228  | chr5:155,135,063-156,194,798 | AX-156275538 |
| SGCD | rs73813228  | chr5:155,135,063-156,194,798 | AX-156292718 |
| SGCD | rs74938710  | chr5:155,135,063-156,194,798 | AX-153329396 |
| SGCD | rs74938710  | chr5:155,135,063-156,194,798 | AX-156275539 |
| SGCD | rs80138336  | chr5:155,135,063-156,194,798 | AX-156275540 |
| SGCD | rs113472609 | chr5:155,135,063-156,194,798 | AX-148493126 |
| SGCD | rs67349834  | chr5:155,135,063-156,194,798 | AX-156275541 |
| SGCD | rs67349834  | chr5:155,135,063-156,194,798 | AX-156292719 |
| SGCD | rs75500192  | chr5:155,135,063-156,194,798 | AX-35168891  |
| SGCD | ---         | chr5:155,135,063-156,194,798 | AX-38254005  |
| SGCD | rs11135048  | chr5:155,135,063-156,194,798 | AX-41644047  |
| SGCD | rs75213665  | chr5:155,135,063-156,194,798 | AX-156275542 |
| SGCD | rs10062823  | chr5:155,135,063-156,194,798 | AX-156275543 |
| SGCD | rs10062823  | chr5:155,135,063-156,194,798 | AX-156292721 |
| SGCD | rs76838101  | chr5:155,135,063-156,194,798 | AX-14942332  |
| SGCD | rs4582259   | chr5:155,135,063-156,194,798 | AX-41644051  |
| SGCD | rs11953463  | chr5:155,135,063-156,194,798 | AX-41644053  |
| SGCD | rs73813229  | chr5:155,135,063-156,194,798 | AX-14942333  |
| SGCD | rs78890533  | chr5:155,135,063-156,194,798 | AX-14942334  |
| SGCD | rs78906896  | chr5:155,135,063-156,194,798 | AX-14942336  |
| SGCD | rs111420216 | chr5:155,135,063-156,194,798 | AX-148602363 |
| SGCD | rs111420216 | chr5:155,135,063-156,194,798 | AX-156284073 |
| SGCD | rs187051084 | chr5:155,135,063-156,194,798 | AX-153274528 |
| SGCD | rs187051084 | chr5:155,135,063-156,194,798 | AX-156284074 |
| SGCD | rs199600451 | chr5:155,135,063-156,194,798 | AX-142765565 |
| SGCD | rs191383548 | chr5:155,135,063-156,194,798 | AX-156284075 |
| SGCD | ---         | chr5:155,135,063-156,194,798 | AX-153235193 |
| SGCD | ---         | chr5:155,135,063-156,194,798 | AX-156285320 |
| SGCD | rs76525873  | chr5:155,135,063-156,194,798 | AX-156275544 |
| SGCD | rs76525873  | chr5:155,135,063-156,194,798 | AX-156292722 |
| SGCD | rs77909569  | chr5:155,135,063-156,194,798 | AX-148476592 |
| SGCD | rs77909569  | chr5:155,135,063-156,194,798 | AX-156282296 |
| SGCD | rs10067216  | chr5:155,135,063-156,194,798 | AX-156282297 |
| SGCD | rs10067216  | chr5:155,135,063-156,194,798 | AX-156296949 |
| SGCD | rs67257169  | chr5:155,135,063-156,194,798 | AX-14942339  |
| SGCD | rs79631630  | chr5:155,135,063-156,194,798 | AX-148592772 |
| SGCD | rs79631630  | chr5:155,135,063-156,194,798 | AX-156275545 |
| SGCD | rs76666190  | chr5:155,135,063-156,194,798 | AX-14942340  |
| SGCD | rs111571767 | chr5:155,135,063-156,194,798 | AX-153329420 |
| SGCD | rs111571767 | chr5:155,135,063-156,194,798 | AX-156284076 |
| SGCD | rs112718008 | chr5:155,135,063-156,194,798 | AX-14942344  |
| SGCD | rs73298688  | chr5:155,135,063-156,194,798 | AX-14942348  |

|      |             |                              |              |
|------|-------------|------------------------------|--------------|
| SGCD | rs7714933   | chr5:155,135,063-156,194,798 | AX-11640666  |
| SGCD | rs4466143   | chr5:155,135,063-156,194,798 | AX-156275546 |
| SGCD | rs4466143   | chr5:155,135,063-156,194,798 | AX-156292723 |
| SGCD | rs7716954   | chr5:155,135,063-156,194,798 | AX-11233746  |
| SGCD | rs7716954   | chr5:155,135,063-156,194,798 | AX-148425112 |
| SGCD | rs7702268   | chr5:155,135,063-156,194,798 | AX-148424445 |
| SGCD | rs7702268   | chr5:155,135,063-156,194,798 | AX-156275547 |
| SGCD | rs10040960  | chr5:155,135,063-156,194,798 | AX-148915317 |
| SGCD | rs10040960  | chr5:155,135,063-156,194,798 | AX-156275548 |
| SGCD | rs256776    | chr5:155,135,063-156,194,798 | AX-156275549 |
| SGCD | rs256776    | chr5:155,135,063-156,194,798 | AX-156292724 |
| SGCD | rs256775    | chr5:155,135,063-156,194,798 | AX-11398843  |
| SGCD | rs34156495  | chr5:155,135,063-156,194,798 | AX-156284526 |
| SGCD | rs34420220  | chr5:155,135,063-156,194,798 | AX-119780452 |
| SGCD | rs79223307  | chr5:155,135,063-156,194,798 | AX-35168921  |
| SGCD | rs57304745  | chr5:155,135,063-156,194,798 | AX-14942361  |
| SGCD | rs12233931  | chr5:155,135,063-156,194,798 | AX-156275550 |
| SGCD | rs12233931  | chr5:155,135,063-156,194,798 | AX-156292725 |
| SGCD | rs32387     | chr5:155,135,063-156,194,798 | AX-156279372 |
| SGCD | rs32387     | chr5:155,135,063-156,194,798 | AX-156295101 |
| SGCD | rs32386     | chr5:155,135,063-156,194,798 | AX-41644061  |
| SGCD | rs32385     | chr5:155,135,063-156,194,798 | AX-41644063  |
| SGCD | rs76490600  | chr5:155,135,063-156,194,798 | AX-14942365  |
| SGCD | rs78643088  | chr5:155,135,063-156,194,798 | AX-35168925  |
| SGCD | rs39947     | chr5:155,135,063-156,194,798 | AX-41644067  |
| SGCD | rs7701883   | chr5:155,135,063-156,194,798 | AX-148159511 |
| SGCD | rs7701883   | chr5:155,135,063-156,194,798 | AX-156279373 |
| SGCD | rs7707018   | chr5:155,135,063-156,194,798 | AX-11640155  |
| SGCD | rs7712924   | chr5:155,135,063-156,194,798 | AX-14942372  |
| SGCD | rs7713089   | chr5:155,135,063-156,194,798 | AX-41644069  |
| SGCD | rs7702370   | chr5:155,135,063-156,194,798 | AX-14942374  |
| SGCD | rs752058    | chr5:155,135,063-156,194,798 | AX-156296950 |
| SGCD | rs891909    | chr5:155,135,063-156,194,798 | AX-12653934  |
| SGCD | rs891908    | chr5:155,135,063-156,194,798 | AX-12653933  |
| SGCD | rs12152972  | chr5:155,135,063-156,194,798 | AX-11193529  |
| SGCD | rs1432707   | chr5:155,135,063-156,194,798 | AX-11263056  |
| SGCD | rs32384     | chr5:155,135,063-156,194,798 | AX-14942380  |
| SGCD | rs74864866  | chr5:155,135,063-156,194,798 | AX-14942381  |
| SGCD | rs1813076   | chr5:155,135,063-156,194,798 | AX-96990543  |
| SGCD | rs79869048  | chr5:155,135,063-156,194,798 | AX-14942383  |
| SGCD | rs78803444  | chr5:155,135,063-156,194,798 | AX-38254017  |
| SGCD | rs185370    | chr5:155,135,063-156,194,798 | AX-12507573  |
| SGCD | rs148753107 | chr5:155,135,063-156,194,798 | AX-153323597 |
| SGCD | rs60736426  | chr5:155,135,063-156,194,798 | AX-151288439 |
| SGCD | rs60736426  | chr5:155,135,063-156,194,798 | AX-156284672 |
| SGCD | rs199591425 | chr5:155,135,063-156,194,798 | AX-121303978 |
| SGCD | rs199591425 | chr5:155,135,063-156,194,798 | AX-156284934 |
| SGCD | rs113491664 | chr5:155,135,063-156,194,798 | AX-148399830 |
| SGCD | rs113491664 | chr5:155,135,063-156,194,798 | AX-156284077 |
| SGCD | rs32383     | chr5:155,135,063-156,194,798 | AX-156275551 |
| SGCD | rs32383     | chr5:155,135,063-156,194,798 | AX-92682750  |
| SGCD | rs1368321   | chr5:155,135,063-156,194,798 | AX-147821706 |
| SGCD | rs1368321   | chr5:155,135,063-156,194,798 | AX-147915678 |
| SGCD | rs3097865   | chr5:155,135,063-156,194,798 | AX-41644093  |
| SGCD | rs1368320   | chr5:155,135,063-156,194,798 | AX-11257025  |

|      |             |                              |              |
|------|-------------|------------------------------|--------------|
| SGCD | rs17626481  | chr5:155,135,063-156,194,798 | AX-14942397  |
| SGCD | rs2436328   | chr5:155,135,063-156,194,798 | AX-156284078 |
| SGCD | rs55756765  | chr5:155,135,063-156,194,798 | AX-35168939  |
| SGCD | rs1549887   | chr5:155,135,063-156,194,798 | AX-14942398  |
| SGCD | rs3097863   | chr5:155,135,063-156,194,798 | AX-156292728 |
| SGCD | rs1030659   | chr5:155,135,063-156,194,798 | AX-156292729 |
| SGCD | rs1030659   | chr5:155,135,063-156,194,798 | AX-84662705  |
| SGCD | rs1030658   | chr5:155,135,063-156,194,798 | AX-156282299 |
| SGCD | rs1030658   | chr5:155,135,063-156,194,798 | AX-156296951 |
| SGCD | rs7737257   | chr5:155,135,063-156,194,798 | AX-41644103  |
| SGCD | rs10075096  | chr5:155,135,063-156,194,798 | AX-14942404  |
| SGCD | rs10042085  | chr5:155,135,063-156,194,798 | AX-14942405  |
| SGCD | rs6874980   | chr5:155,135,063-156,194,798 | AX-41644109  |
| SGCD | rs6890997   | chr5:155,135,063-156,194,798 | AX-50448296  |
| SGCD | rs6891351   | chr5:155,135,063-156,194,798 | AX-14942409  |
| SGCD | rs79446952  | chr5:155,135,063-156,194,798 | AX-35168949  |
| SGCD | rs145021986 | chr5:155,135,063-156,194,798 | AX-107766046 |
| SGCD | rs145021986 | chr5:155,135,063-156,194,798 | AX-156285603 |
| SGCD | rs144080122 | chr5:155,135,063-156,194,798 | AX-153306802 |
| SGCD | rs144080122 | chr5:155,135,063-156,194,798 | AX-156284358 |
| SGCD | rs1368319   | chr5:155,135,063-156,194,798 | AX-14942413  |
| SGCD | rs2871724   | chr5:155,135,063-156,194,798 | AX-14942414  |
| SGCD | rs76412476  | chr5:155,135,063-156,194,798 | AX-14942418  |
| SGCD | rs32381     | chr5:155,135,063-156,194,798 | AX-41644115  |
| SGCD | rs32380     | chr5:155,135,063-156,194,798 | AX-14942420  |
| SGCD | rs41084     | chr5:155,135,063-156,194,798 | AX-41644119  |
| SGCD | rs1368317   | chr5:155,135,063-156,194,798 | AX-41644121  |
| SGCD | rs17538098  | chr5:155,135,063-156,194,798 | AX-50902267  |
| SGCD | rs3097808   | chr5:155,135,063-156,194,798 | AX-14942426  |
| SGCD | rs919728    | chr5:155,135,063-156,194,798 | AX-14942429  |
| SGCD | rs32379     | chr5:155,135,063-156,194,798 | AX-14942436  |
| SGCD | rs72807765  | chr5:155,135,063-156,194,798 | AX-14942438  |
| SGCD | rs1368316   | chr5:155,135,063-156,194,798 | AX-14942442  |
| SGCD | rs3097862   | chr5:155,135,063-156,194,798 | AX-156275555 |
| SGCD | rs3097862   | chr5:155,135,063-156,194,798 | AX-156292730 |
| SGCD | rs10476293  | chr5:155,135,063-156,194,798 | AX-14942444  |
| SGCD | rs60577002  | chr5:155,135,063-156,194,798 | AX-14942446  |
| SGCD | rs17053240  | chr5:155,135,063-156,194,798 | AX-14942447  |
| SGCD | rs32336     | chr5:155,135,063-156,194,798 | AX-12550084  |
| SGCD | rs32337     | chr5:155,135,063-156,194,798 | AX-14942450  |
| SGCD | rs3097860   | chr5:155,135,063-156,194,798 | AX-14942454  |
| SGCD | rs32338     | chr5:155,135,063-156,194,798 | AX-148096752 |
| SGCD | rs32338     | chr5:155,135,063-156,194,798 | AX-156282300 |
| SGCD | ---         | chr5:155,135,063-156,194,798 | AX-148605808 |
| SGCD | ---         | chr5:155,135,063-156,194,798 | AX-156275556 |
| SGCD | rs111665014 | chr5:155,135,063-156,194,798 | AX-148840467 |
| SGCD | rs111665014 | chr5:155,135,063-156,194,798 | AX-156275557 |
| SGCD | rs3097859   | chr5:155,135,063-156,194,798 | AX-148120153 |
| SGCD | rs3097859   | chr5:155,135,063-156,194,798 | AX-156275558 |
| SGCD | rs12109563  | chr5:155,135,063-156,194,798 | AX-156275559 |
| SGCD | rs12109563  | chr5:155,135,063-156,194,798 | AX-96815524  |
| SGCD | rs10043109  | chr5:155,135,063-156,194,798 | AX-14942460  |
| SGCD | rs11748176  | chr5:155,135,063-156,194,798 | AX-11172458  |
| SGCD | ---         | chr5:155,135,063-156,194,798 | AX-11417872  |
| SGCD | rs17053242  | chr5:155,135,063-156,194,798 | AX-41644125  |

|      |             |                              |              |
|------|-------------|------------------------------|--------------|
| SGCD | rs2436423   | chr5:155,135,063-156,194,798 | AX-41644127  |
| SGCD | rs28678150  | chr5:155,135,063-156,194,798 | AX-11421996  |
| SGCD | rs116341883 | chr5:155,135,063-156,194,798 | AX-14942461  |
| SGCD | rs256774    | chr5:155,135,063-156,194,798 | AX-153340859 |
| SGCD | rs256774    | chr5:155,135,063-156,194,798 | AX-156284079 |
| SGCD | rs2436330   | chr5:155,135,063-156,194,798 | AX-148340800 |
| SGCD | rs2436330   | chr5:155,135,063-156,194,798 | AX-88748592  |
| SGCD | rs4704977   | chr5:155,135,063-156,194,798 | AX-14942464  |
| SGCD | rs10037288  | chr5:155,135,063-156,194,798 | AX-156275560 |
| SGCD | rs10037288  | chr5:155,135,063-156,194,798 | AX-156292731 |
| SGCD | rs74715625  | chr5:155,135,063-156,194,798 | AX-156278661 |
| SGCD | rs80034015  | chr5:155,135,063-156,194,798 | AX-14942466  |
| SGCD | rs112787417 | chr5:155,135,063-156,194,798 | AX-14942468  |
| SGCD | rs72807768  | chr5:155,135,063-156,194,798 | AX-35168999  |
| SGCD | ---         | chr5:155,135,063-156,194,798 | AX-153368105 |
| SGCD | ---         | chr5:155,135,063-156,194,798 | AX-96700010  |
| SGCD | rs3097854   | chr5:155,135,063-156,194,798 | AX-148121041 |
| SGCD | rs3097854   | chr5:155,135,063-156,194,798 | AX-96820597  |
| SGCD | rs200918175 | chr5:155,135,063-156,194,798 | AX-153373544 |
| SGCD | rs200918175 | chr5:155,135,063-156,194,798 | AX-156286455 |
| SGCD | rs35364834  | chr5:155,135,063-156,194,798 | AX-153371277 |
| SGCD | rs35364834  | chr5:155,135,063-156,194,798 | AX-156298496 |
| SGCD | rs17053243  | chr5:155,135,063-156,194,798 | AX-41644131  |
| SGCD | rs28589948  | chr5:155,135,063-156,194,798 | AX-35169001  |
| SGCD | rs10068958  | chr5:155,135,063-156,194,798 | AX-14942475  |
| SGCD | rs78073979  | chr5:155,135,063-156,194,798 | AX-35169005  |
| SGCD | ---         | chr5:155,135,063-156,194,798 | AX-41644135  |
| SGCD | rs114154914 | chr5:155,135,063-156,194,798 | AX-14942477  |
| SGCD | rs28622493  | chr5:155,135,063-156,194,798 | AX-156275561 |
| SGCD | rs28622493  | chr5:155,135,063-156,194,798 | AX-92458494  |
| SGCD | rs1594651   | chr5:155,135,063-156,194,798 | AX-14942479  |
| SGCD | rs71577189  | chr5:155,135,063-156,194,798 | AX-153230771 |
| SGCD | rs71577189  | chr5:155,135,063-156,194,798 | AX-156298386 |
| SGCD | rs256771    | chr5:155,135,063-156,194,798 | AX-11398841  |
| SGCD | rs73811412  | chr5:155,135,063-156,194,798 | AX-35169013  |
| SGCD | rs256770    | chr5:155,135,063-156,194,798 | AX-156282301 |
| SGCD | rs256769    | chr5:155,135,063-156,194,798 | AX-12532113  |
| SGCD | rs56206905  | chr5:155,135,063-156,194,798 | AX-14942482  |
| SGCD | rs34571631  | chr5:155,135,063-156,194,798 | AX-153345625 |
| SGCD | rs78223757  | chr5:155,135,063-156,194,798 | AX-14942491  |
| SGCD | rs10053788  | chr5:155,135,063-156,194,798 | AX-14942493  |
| SGCD | rs6880666   | chr5:155,135,063-156,194,798 | AX-156275562 |
| SGCD | rs6880666   | chr5:155,135,063-156,194,798 | AX-156292732 |
| SGCD | rs3097806   | chr5:155,135,063-156,194,798 | AX-156292733 |
| SGCD | rs58339191  | chr5:155,135,063-156,194,798 | AX-122531720 |
| SGCD | rs11955720  | chr5:155,135,063-156,194,798 | AX-156292734 |
| SGCD | rs1594649   | chr5:155,135,063-156,194,798 | AX-156275565 |
| SGCD | rs17053245  | chr5:155,135,063-156,194,798 | AX-12487878  |
| SGCD | rs6888796   | chr5:155,135,063-156,194,798 | AX-153378570 |
| SGCD | rs6888796   | chr5:155,135,063-156,194,798 | AX-156284080 |
| SGCD | rs6888987   | chr5:155,135,063-156,194,798 | AX-148839312 |
| SGCD | rs10078170  | chr5:155,135,063-156,194,798 | AX-14942503  |
| SGCD | rs73811416  | chr5:155,135,063-156,194,798 | AX-156275566 |
| SGCD | rs73811416  | chr5:155,135,063-156,194,798 | AX-156292735 |
| SGCD | rs73811417  | chr5:155,135,063-156,194,798 | AX-14942508  |

|      |             |                              |              |
|------|-------------|------------------------------|--------------|
| SGCD | rs77413324  | chr5:155,135,063-156,194,798 | AX-14942511  |
| SGCD | rs1966638   | chr5:155,135,063-156,194,798 | AX-14942512  |
| SGCD | rs1966637   | chr5:155,135,063-156,194,798 | AX-11356496  |
| SGCD | rs73300637  | chr5:155,135,063-156,194,798 | AX-14942513  |
| SGCD | rs17053247  | chr5:155,135,063-156,194,798 | AX-41644147  |
| SGCD | rs56342808  | chr5:155,135,063-156,194,798 | AX-14942515  |
| SGCD | rs73811418  | chr5:155,135,063-156,194,798 | AX-35169033  |
| SGCD | rs113685185 | chr5:155,135,063-156,194,798 | AX-14942516  |
| SGCD | rs73811419  | chr5:155,135,063-156,194,798 | AX-14942517  |
| SGCD | rs76387127  | chr5:155,135,063-156,194,798 | AX-35169035  |
| SGCD | rs74883185  | chr5:155,135,063-156,194,798 | AX-35169037  |
| SGCD | rs10055867  | chr5:155,135,063-156,194,798 | AX-123060398 |
| SGCD | rs10055867  | chr5:155,135,063-156,194,798 | AX-156282302 |
| SGCD | rs75964912  | chr5:155,135,063-156,194,798 | AX-148668023 |
| SGCD | rs75964912  | chr5:155,135,063-156,194,798 | AX-156282303 |
| SGCD | rs17053249  | chr5:155,135,063-156,194,798 | AX-14942521  |
| SGCD | rs67331625  | chr5:155,135,063-156,194,798 | AX-14942525  |
| SGCD | rs59728202  | chr5:155,135,063-156,194,798 | AX-35169045  |
| SGCD | rs7724249   | chr5:155,135,063-156,194,798 | AX-14942526  |
| SGCD | rs17053251  | chr5:155,135,063-156,194,798 | AX-12487879  |
| SGCD | rs115327209 | chr5:155,135,063-156,194,798 | AX-35169049  |
| SGCD | rs17053253  | chr5:155,135,063-156,194,798 | AX-41644151  |
| SGCD | rs140971432 | chr5:155,135,063-156,194,798 | AX-153344914 |
| SGCD | rs140971432 | chr5:155,135,063-156,194,798 | AX-156285268 |
| SGCD | rs73811509  | chr5:155,135,063-156,194,798 | AX-35169055  |
| SGCD | rs1835927   | chr5:155,135,063-156,194,798 | AX-156275567 |
| SGCD | rs1835927   | chr5:155,135,063-156,194,798 | AX-156292736 |
| SGCD | rs72807771  | chr5:155,135,063-156,194,798 | AX-35169057  |
| SGCD | rs74757950  | chr5:155,135,063-156,194,798 | AX-35169059  |
| SGCD | rs73811512  | chr5:155,135,063-156,194,798 | AX-14942530  |
| SGCD | rs56872047  | chr5:155,135,063-156,194,798 | AX-14942531  |
| SGCD | rs17053254  | chr5:155,135,063-156,194,798 | AX-41644155  |
| SGCD | rs76492040  | chr5:155,135,063-156,194,798 | AX-35169065  |
| SGCD | rs10055361  | chr5:155,135,063-156,194,798 | AX-41644157  |
| SGCD | rs1816398   | chr5:155,135,063-156,194,798 | AX-11345396  |
| SGCD | rs1821245   | chr5:155,135,063-156,194,798 | AX-14942533  |
| SGCD | rs1821244   | chr5:155,135,063-156,194,798 | AX-14942534  |
| SGCD | rs2311448   | chr5:155,135,063-156,194,798 | AX-41644159  |
| SGCD | rs2311449   | chr5:155,135,063-156,194,798 | AX-12525645  |
| SGCD | rs2311450   | chr5:155,135,063-156,194,798 | AX-35169073  |
| SGCD | rs1821243   | chr5:155,135,063-156,194,798 | AX-12506885  |
| SGCD | rs1821242   | chr5:155,135,063-156,194,798 | AX-12506884  |
| SGCD | rs10054296  | chr5:155,135,063-156,194,798 | AX-35169083  |
| SGCD | rs7715033   | chr5:155,135,063-156,194,798 | AX-12637929  |
| SGCD | rs2311451   | chr5:155,135,063-156,194,798 | AX-156275568 |
| SGCD | rs2311451   | chr5:155,135,063-156,194,798 | AX-156292738 |
| SGCD | rs17053262  | chr5:155,135,063-156,194,798 | AX-14942539  |
| SGCD | rs28532765  | chr5:155,135,063-156,194,798 | AX-153355868 |
| SGCD | rs28532765  | chr5:155,135,063-156,194,798 | AX-156275569 |
| SGCD | rs56356206  | chr5:155,135,063-156,194,798 | AX-14942542  |
| SGCD | rs1972775   | chr5:155,135,063-156,194,798 | AX-14942543  |
| SGCD | rs11952838  | chr5:155,135,063-156,194,798 | AX-41644169  |
| SGCD | rs1972774   | chr5:155,135,063-156,194,798 | AX-156282304 |
| SGCD | rs1972773   | chr5:155,135,063-156,194,798 | AX-11356812  |
| SGCD | rs11948975  | chr5:155,135,063-156,194,798 | AX-41644173  |



|      |             |                              |              |
|------|-------------|------------------------------|--------------|
| SGCD | rs1972772   | chr5:155,135,063-156,194,798 | AX-41644175  |
| SGCD | rs10063678  | chr5:155,135,063-156,194,798 | AX-156282305 |
| SGCD | rs10063678  | chr5:155,135,063-156,194,798 | AX-156296954 |
| SGCD | rs11739922  | chr5:155,135,063-156,194,798 | AX-14942548  |
| SGCD | rs17053271  | chr5:155,135,063-156,194,798 | AX-156275570 |
| SGCD | rs17053271  | chr5:155,135,063-156,194,798 | AX-156292739 |
| SGCD | rs10059221  | chr5:155,135,063-156,194,798 | AX-156275571 |
| SGCD | rs10059221  | chr5:155,135,063-156,194,798 | AX-156292740 |
| SGCD | rs4397116   | chr5:155,135,063-156,194,798 | AX-156275572 |
| SGCD | rs6886990   | chr5:155,135,063-156,194,798 | AX-14942557  |
| SGCD | rs1835925   | chr5:155,135,063-156,194,798 | AX-14942562  |
| SGCD | rs1835924   | chr5:155,135,063-156,194,798 | AX-35169095  |
| SGCD | rs73811522  | chr5:155,135,063-156,194,798 | AX-14942565  |
| SGCD | rs78920533  | chr5:155,135,063-156,194,798 | AX-35169099  |
| SGCD | rs56282009  | chr5:155,135,063-156,194,798 | AX-11708346  |
| SGCD | rs7703516   | chr5:155,135,063-156,194,798 | AX-149563648 |
| SGCD | rs58716367  | chr5:155,135,063-156,194,798 | AX-156268202 |
| SGCD | rs7704124   | chr5:155,135,063-156,194,798 | AX-12637540  |
| SGCD | rs2311452   | chr5:155,135,063-156,194,798 | AX-156268203 |
| SGCD | rs2311452   | chr5:155,135,063-156,194,798 | AX-156288054 |
| SGCD | rs150535799 | chr5:155,135,063-156,194,798 | AX-153360245 |
| SGCD | rs150535799 | chr5:155,135,063-156,194,798 | AX-156285956 |
| SGCD | rs11741638  | chr5:155,135,063-156,194,798 | AX-156282306 |
| SGCD | rs11741638  | chr5:155,135,063-156,194,798 | AX-156296955 |
| SGCD | rs7714789   | chr5:155,135,063-156,194,798 | AX-12637921  |
| SGCD | rs10866716  | chr5:155,135,063-156,194,798 | AX-14942582  |
| SGCD | rs4704979   | chr5:155,135,063-156,194,798 | AX-14942586  |
| SGCD | rs4704980   | chr5:155,135,063-156,194,798 | AX-156288055 |
| SGCD | rs4704981   | chr5:155,135,063-156,194,798 | AX-41644201  |
| SGCD | rs7733123   | chr5:155,135,063-156,194,798 | AX-156288056 |
| SGCD | rs4704983   | chr5:155,135,063-156,194,798 | AX-119407701 |
| SGCD | rs4704983   | chr5:155,135,063-156,194,798 | AX-153272440 |
| SGCD | rs79905900  | chr5:155,135,063-156,194,798 | AX-14942588  |
| SGCD | rs73811523  | chr5:155,135,063-156,194,798 | AX-14942590  |
| SGCD | rs4704984   | chr5:155,135,063-156,194,798 | AX-41644207  |
| SGCD | rs114121569 | chr5:155,135,063-156,194,798 | AX-14942595  |
| SGCD | rs115263165 | chr5:155,135,063-156,194,798 | AX-14942596  |
| SGCD | rs7709917   | chr5:155,135,063-156,194,798 | AX-11640322  |
| SGCD | rs73811524  | chr5:155,135,063-156,194,798 | AX-14942598  |
| SGCD | rs78679963  | chr5:155,135,063-156,194,798 | AX-14942601  |
| SGCD | rs7726257   | chr5:155,135,063-156,194,798 | AX-14942602  |
| SGCD | rs6556456   | chr5:155,135,063-156,194,798 | AX-14942605  |
| SGCD | rs7731274   | chr5:155,135,063-156,194,798 | AX-41644211  |
| SGCD | rs7731803   | chr5:155,135,063-156,194,798 | AX-148219024 |
| SGCD | rs7732153   | chr5:155,135,063-156,194,798 | AX-14942607  |
| SGCD | rs11954107  | chr5:155,135,063-156,194,798 | AX-41644215  |
| SGCD | rs5872454   | chr5:155,135,063-156,194,798 | AX-12591353  |
| SGCD | rs5872454   | chr5:155,135,063-156,194,798 | AX-156275574 |
| SGCD | rs10064955  | chr5:155,135,063-156,194,798 | AX-156268206 |
| SGCD | rs10064955  | chr5:155,135,063-156,194,798 | AX-156288057 |
| SGCD | rs10075720  | chr5:155,135,063-156,194,798 | AX-11091152  |
| SGCD | rs78651833  | chr5:155,135,063-156,194,798 | AX-14942610  |
| SGCD | rs62380717  | chr5:155,135,063-156,194,798 | AX-156288058 |
| SGCD | rs73811527  | chr5:155,135,063-156,194,798 | AX-156268208 |
| SGCD | rs73811527  | chr5:155,135,063-156,194,798 | AX-156288059 |

|      |             |                              |              |
|------|-------------|------------------------------|--------------|
| SGCD | rs72809694  | chr5:155,135,063-156,194,798 | AX-35169123  |
| SGCD | rs7736255   | chr5:155,135,063-156,194,798 | AX-14942611  |
| SGCD | rs57341712  | chr5:155,135,063-156,194,798 | AX-153369299 |
| SGCD | rs57341712  | chr5:155,135,063-156,194,798 | AX-156298224 |
| SGCD | rs73811529  | chr5:155,135,063-156,194,798 | AX-14942617  |
| SGCD | rs1835922   | chr5:155,135,063-156,194,798 | AX-156282307 |
| SGCD | rs1835922   | chr5:155,135,063-156,194,798 | AX-156296957 |
| SGCD | rs111857080 | chr5:155,135,063-156,194,798 | AX-122409187 |
| SGCD | rs10223195  | chr5:155,135,063-156,194,798 | AX-14942621  |
| SGCD | ---         | chr5:155,135,063-156,194,798 | AX-105066450 |
| SGCD | rs200439050 | chr5:155,135,063-156,194,798 | AX-153286716 |
| SGCD | rs200439050 | chr5:155,135,063-156,194,798 | AX-156285099 |
| SGCD | rs6885373   | chr5:155,135,063-156,194,798 | AX-11592065  |
| SGCD | rs4526092   | chr5:155,135,063-156,194,798 | AX-14942623  |
| SGCD | rs2311453   | chr5:155,135,063-156,194,798 | AX-14942625  |
| SGCD | rs74938463  | chr5:155,135,063-156,194,798 | AX-156284081 |
| SGCD | rs4704985   | chr5:155,135,063-156,194,798 | AX-156275575 |
| SGCD | rs4704985   | chr5:155,135,063-156,194,798 | AX-156292743 |
| SGCD | rs4704986   | chr5:155,135,063-156,194,798 | AX-41644221  |
| SGCD | rs4704782   | chr5:155,135,063-156,194,798 | AX-156268210 |
| SGCD | rs4704782   | chr5:155,135,063-156,194,798 | AX-156288061 |
| SGCD | rs55866075  | chr5:155,135,063-156,194,798 | AX-14942634  |
| SGCD | rs59869767  | chr5:155,135,063-156,194,798 | AX-156288062 |
| SGCD | rs57052744  | chr5:155,135,063-156,194,798 | AX-156288063 |
| SGCD | rs61351228  | chr5:155,135,063-156,194,798 | AX-35169147  |
| SGCD | rs4704987   | chr5:155,135,063-156,194,798 | AX-35169149  |
| SGCD | rs28524790  | chr5:155,135,063-156,194,798 | AX-156268212 |
| SGCD | rs28524790  | chr5:155,135,063-156,194,798 | AX-156288064 |
| SGCD | rs28407242  | chr5:155,135,063-156,194,798 | AX-14942638  |
| SGCD | rs6872617   | chr5:155,135,063-156,194,798 | AX-11591275  |
| SGCD | rs6897151   | chr5:155,135,063-156,194,798 | AX-14942641  |
| SGCD | rs6860981   | chr5:155,135,063-156,194,798 | AX-14942643  |
| SGCD | rs6861175   | chr5:155,135,063-156,194,798 | AX-156282308 |
| SGCD | rs6861175   | chr5:155,135,063-156,194,798 | AX-95864188  |
| SGCD | rs6890078   | chr5:155,135,063-156,194,798 | AX-148139623 |
| SGCD | rs6890078   | chr5:155,135,063-156,194,798 | AX-92732009  |
| SGCD | rs6861703   | chr5:155,135,063-156,194,798 | AX-35169157  |
| SGCD | rs6890597   | chr5:155,135,063-156,194,798 | AX-156268213 |
| SGCD | rs6890597   | chr5:155,135,063-156,194,798 | AX-156288065 |
| SGCD | rs68120551  | chr5:155,135,063-156,194,798 | AX-148154910 |
| SGCD | rs68120551  | chr5:155,135,063-156,194,798 | AX-156268214 |
| SGCD | rs10476319  | chr5:155,135,063-156,194,798 | AX-148049670 |
| SGCD | rs10476319  | chr5:155,135,063-156,194,798 | AX-156268215 |
| SGCD | rs10475679  | chr5:155,135,063-156,194,798 | AX-14942649  |
| SGCD | rs4342313   | chr5:155,135,063-156,194,798 | AX-156268218 |
| SGCD | rs4540164   | chr5:155,135,063-156,194,798 | AX-156268219 |
| SGCD | rs4626322   | chr5:155,135,063-156,194,798 | AX-156288070 |
| SGCD | rs35159937  | chr5:155,135,063-156,194,798 | AX-107834025 |
| SGCD | rs35159937  | chr5:155,135,063-156,194,798 | AX-156297924 |
| SGCD | rs2871769   | chr5:155,135,063-156,194,798 | AX-35169171  |
| SGCD | rs60446159  | chr5:155,135,063-156,194,798 | AX-156268221 |
| SGCD | rs60446159  | chr5:155,135,063-156,194,798 | AX-156288071 |
| SGCD | rs59484684  | chr5:155,135,063-156,194,798 | AX-14942654  |
| SGCD | rs57906039  | chr5:155,135,063-156,194,798 | AX-14942655  |
| SGCD | rs200410807 | chr5:155,135,063-156,194,798 | AX-153242678 |

|      |             |                              |              |
|------|-------------|------------------------------|--------------|
| SGCD | rs149090365 | chr5:155,135,063-156,194,798 | AX-121718257 |
| SGCD | rs1835921   | chr5:155,135,063-156,194,798 | AX-14942656  |
| SGCD | rs76473087  | chr5:155,135,063-156,194,798 | AX-14942657  |
| SGCD | rs1835920   | chr5:155,135,063-156,194,798 | AX-148114871 |
| SGCD | rs1835920   | chr5:155,135,063-156,194,798 | AX-98009692  |
| SGCD | rs4704784   | chr5:155,135,063-156,194,798 | AX-156296958 |
| SGCD | rs73811534  | chr5:155,135,063-156,194,798 | AX-14942661  |
| SGCD | rs76220427  | chr5:155,135,063-156,194,798 | AX-156292744 |
| SGCD | rs76220427  | chr5:155,135,063-156,194,798 | AX-50680457  |
| SGCD | rs10073691  | chr5:155,135,063-156,194,798 | AX-12380492  |
| SGCD | rs7729219   | chr5:155,135,063-156,194,798 | AX-14942664  |
| SGCD | rs149641799 | chr5:155,135,063-156,194,798 | AX-118500561 |
| SGCD | rs13159707  | chr5:155,135,063-156,194,798 | AX-150853961 |
| SGCD | rs13186876  | chr5:155,135,063-156,194,798 | AX-121862095 |
| SGCD | rs13182225  | chr5:155,135,063-156,194,798 | AX-153129033 |
| SGCD | rs13182225  | chr5:155,135,063-156,194,798 | AX-156284082 |
| SGCD | rs7711145   | chr5:155,135,063-156,194,798 | AX-119759348 |
| SGCD | rs7711145   | chr5:155,135,063-156,194,798 | AX-96674537  |
| SGCD | rs62380736  | chr5:155,135,063-156,194,798 | AX-14942666  |
| SGCD | rs73811535  | chr5:155,135,063-156,194,798 | AX-156268222 |
| SGCD | rs73811535  | chr5:155,135,063-156,194,798 | AX-156288072 |
| SGCD | rs1835919   | chr5:155,135,063-156,194,798 | AX-14942667  |
| SGCD | rs1835918   | chr5:155,135,063-156,194,798 | AX-14942668  |
| SGCD | rs1835917   | chr5:155,135,063-156,194,798 | AX-35169183  |
| SGCD | rs60536864  | chr5:155,135,063-156,194,798 | AX-14942670  |
| SGCD | rs6860628   | chr5:155,135,063-156,194,798 | AX-156268223 |
| SGCD | rs6860628   | chr5:155,135,063-156,194,798 | AX-156288073 |
| SGCD | rs1835916   | chr5:155,135,063-156,194,798 | AX-14942674  |
| SGCD | rs991611    | chr5:155,135,063-156,194,798 | AX-41644239  |
| SGCD | rs12189076  | chr5:155,135,063-156,194,798 | AX-41644241  |
| SGCD | rs4704988   | chr5:155,135,063-156,194,798 | AX-41644243  |
| SGCD | rs13165703  | chr5:155,135,063-156,194,798 | AX-156268224 |
| SGCD | rs13165703  | chr5:155,135,063-156,194,798 | AX-156288074 |
| SGCD | rs60249910  | chr5:155,135,063-156,194,798 | AX-14942678  |
| SGCD | rs6883190   | chr5:155,135,063-156,194,798 | AX-14942679  |
| SGCD | rs6876263   | chr5:155,135,063-156,194,798 | AX-14942682  |
| SGCD | rs76534858  | chr5:155,135,063-156,194,798 | AX-153229932 |
| SGCD | rs76534858  | chr5:155,135,063-156,194,798 | AX-156298581 |
| SGCD | rs11741549  | chr5:155,135,063-156,194,798 | AX-11171965  |
| SGCD | rs11742893  | chr5:155,135,063-156,194,798 | AX-148037402 |
| SGCD | rs11742893  | chr5:155,135,063-156,194,798 | AX-156275576 |
| SGCD | rs13152929  | chr5:155,135,063-156,194,798 | AX-148431842 |
| SGCD | rs13152929  | chr5:155,135,063-156,194,798 | AX-156275577 |
| SGCD | rs73811537  | chr5:155,135,063-156,194,798 | AX-35169197  |
| SGCD | rs35426260  | chr5:155,135,063-156,194,798 | AX-14942690  |
| SGCD | rs17053320  | chr5:155,135,063-156,194,798 | AX-14942691  |
| SGCD | rs62380739  | chr5:155,135,063-156,194,798 | AX-14942692  |
| SGCD | rs4704989   | chr5:155,135,063-156,194,798 | AX-14942694  |
| SGCD | rs4704991   | chr5:155,135,063-156,194,798 | AX-156282310 |
| SGCD | rs4704991   | chr5:155,135,063-156,194,798 | AX-156296959 |
| SGCD | rs4704785   | chr5:155,135,063-156,194,798 | AX-35169209  |
| SGCD | rs10037014  | chr5:155,135,063-156,194,798 | AX-14942695  |
| SGCD | rs73811538  | chr5:155,135,063-156,194,798 | AX-14942696  |
| SGCD | rs12054896  | chr5:155,135,063-156,194,798 | AX-35169215  |
| SGCD | rs114145307 | chr5:155,135,063-156,194,798 | AX-14942698  |

|      |             |                              |              |
|------|-------------|------------------------------|--------------|
| SGCD | rs12054851  | chr5:155,135,063-156,194,798 | AX-11188546  |
| SGCD | rs12054855  | chr5:155,135,063-156,194,798 | AX-14942701  |
| SGCD | rs1835915   | chr5:155,135,063-156,194,798 | AX-14942703  |
| SGCD | rs62380741  | chr5:155,135,063-156,194,798 | AX-14942707  |
| SGCD | rs57509490  | chr5:155,135,063-156,194,798 | AX-35169221  |
| SGCD | rs13178125  | chr5:155,135,063-156,194,798 | AX-41644255  |
| SGCD | rs11950500  | chr5:155,135,063-156,194,798 | AX-148039467 |
| SGCD | rs11950500  | chr5:155,135,063-156,194,798 | AX-156275578 |
| SGCD | rs116659662 | chr5:155,135,063-156,194,798 | AX-38254139  |
| SGCD | rs4704786   | chr5:155,135,063-156,194,798 | AX-14942711  |
| SGCD | rs4704992   | chr5:155,135,063-156,194,798 | AX-156275579 |
| SGCD | rs4704992   | chr5:155,135,063-156,194,798 | AX-156292745 |
| SGCD | rs4704787   | chr5:155,135,063-156,194,798 | AX-35169235  |
| SGCD | rs62380743  | chr5:155,135,063-156,194,798 | AX-14942713  |
| SGCD | rs75363043  | chr5:155,135,063-156,194,798 | AX-148803970 |
| SGCD | rs75363043  | chr5:155,135,063-156,194,798 | AX-156275580 |
| SGCD | rs12188348  | chr5:155,135,063-156,194,798 | AX-156275581 |
| SGCD | rs12188348  | chr5:155,135,063-156,194,798 | AX-156292746 |
| SGCD | rs1968434   | chr5:155,135,063-156,194,798 | AX-41644257  |
| SGCD | rs62380744  | chr5:155,135,063-156,194,798 | AX-35169245  |
| SGCD | rs1968433   | chr5:155,135,063-156,194,798 | AX-41644259  |
| SGCD | rs62380745  | chr5:155,135,063-156,194,798 | AX-14942715  |
| SGCD | rs11747910  | chr5:155,135,063-156,194,798 | AX-14942718  |
| SGCD | rs4704993   | chr5:155,135,063-156,194,798 | AX-35169249  |
| SGCD | rs4704994   | chr5:155,135,063-156,194,798 | AX-11519466  |
| SGCD | rs17053328  | chr5:155,135,063-156,194,798 | AX-12487883  |
| SGCD | rs17053330  | chr5:155,135,063-156,194,798 | AX-35169251  |
| SGCD | rs11748101  | chr5:155,135,063-156,194,798 | AX-14942721  |
| SGCD | rs1366227   | chr5:155,135,063-156,194,798 | AX-14942724  |
| SGCD | rs10515735  | chr5:155,135,063-156,194,798 | AX-41644261  |
| SGCD | rs249887    | chr5:155,135,063-156,194,798 | AX-41644263  |
| SGCD | rs11951117  | chr5:155,135,063-156,194,798 | AX-12423956  |
| SGCD | rs17053343  | chr5:155,135,063-156,194,798 | AX-14942728  |
| SGCD | rs17053346  | chr5:155,135,063-156,194,798 | AX-14942730  |
| SGCD | rs30283     | chr5:155,135,063-156,194,798 | AX-156275583 |
| SGCD | rs30283     | chr5:155,135,063-156,194,798 | AX-156292748 |
| SGCD | rs56660863  | chr5:155,135,063-156,194,798 | AX-14942733  |
| SGCD | rs17053347  | chr5:155,135,063-156,194,798 | AX-156275584 |
| SGCD | rs17053347  | chr5:155,135,063-156,194,798 | AX-156292749 |
| SGCD | rs57229190  | chr5:155,135,063-156,194,798 | AX-35169265  |
| SGCD | rs249886    | chr5:155,135,063-156,194,798 | AX-156268225 |
| SGCD | rs249886    | chr5:155,135,063-156,194,798 | AX-156288075 |
| SGCD | rs249885    | chr5:155,135,063-156,194,798 | AX-14942741  |
| SGCD | rs62380749  | chr5:155,135,063-156,194,798 | AX-14942743  |
| SGCD | rs249884    | chr5:155,135,063-156,194,798 | AX-14942744  |
| SGCD | rs73811546  | chr5:155,135,063-156,194,798 | AX-156282311 |
| SGCD | rs73811546  | chr5:155,135,063-156,194,798 | AX-156296960 |
| SGCD | rs249883    | chr5:155,135,063-156,194,798 | AX-156275585 |
| SGCD | rs77357980  | chr5:155,135,063-156,194,798 | AX-148862389 |
| SGCD | rs77357980  | chr5:155,135,063-156,194,798 | AX-156275586 |
| SGCD | rs72811731  | chr5:155,135,063-156,194,798 | AX-35169271  |
| SGCD | rs249881    | chr5:155,135,063-156,194,798 | AX-12530691  |
| SGCD | rs249880    | chr5:155,135,063-156,194,798 | AX-122892240 |
| SGCD | rs249880    | chr5:155,135,063-156,194,798 | AX-156268226 |
| SGCD | rs249878    | chr5:155,135,063-156,194,798 | AX-96092285  |

|      |             |                              |              |
|------|-------------|------------------------------|--------------|
| SGCD | rs77156821  | chr5:155,135,063-156,194,798 | AX-35169275  |
| SGCD | rs17053349  | chr5:155,135,063-156,194,798 | AX-14942763  |
| SGCD | rs17053350  | chr5:155,135,063-156,194,798 | AX-14942764  |
| SGCD | rs30276     | chr5:155,135,063-156,194,798 | AX-41644285  |
| SGCD | rs39584     | chr5:155,135,063-156,194,798 | AX-14942772  |
| SGCD | rs114603152 | chr5:155,135,063-156,194,798 | AX-66999955  |
| SGCD | rs405179    | chr5:155,135,063-156,194,798 | AX-11489633  |
| SGCD | rs447817    | chr5:155,135,063-156,194,798 | AX-14942779  |
| SGCD | rs249872    | chr5:155,135,063-156,194,798 | AX-128218793 |
| SGCD | rs249872    | chr5:155,135,063-156,194,798 | AX-156268228 |
| SGCD | rs11949402  | chr5:155,135,063-156,194,798 | AX-148189520 |
| SGCD | rs11949402  | chr5:155,135,063-156,194,798 | AX-156268229 |
| SGCD | rs249873    | chr5:155,135,063-156,194,798 | AX-153230559 |
| SGCD | rs249873    | chr5:155,135,063-156,194,798 | AX-156268230 |
| SGCD | rs249874    | chr5:155,135,063-156,194,798 | AX-148363020 |
| SGCD | rs249874    | chr5:155,135,063-156,194,798 | AX-156282312 |
| SGCD | rs7730492   | chr5:155,135,063-156,194,798 | AX-119367156 |
| SGCD | rs7730492   | chr5:155,135,063-156,194,798 | AX-156284083 |
| SGCD | rs7730494   | chr5:155,135,063-156,194,798 | AX-119652480 |
| SGCD | rs7730494   | chr5:155,135,063-156,194,798 | AX-121550022 |
| SGCD | rs670814    | chr5:155,135,063-156,194,798 | AX-148397848 |
| SGCD | rs670814    | chr5:155,135,063-156,194,798 | AX-156268231 |
| SGCD | rs184548079 | chr5:155,135,063-156,194,798 | AX-148824028 |
| SGCD | rs184548079 | chr5:155,135,063-156,194,798 | AX-156284084 |
| SGCD | rs74883231  | chr5:155,135,063-156,194,798 | AX-113210907 |
| SGCD | rs74883231  | chr5:155,135,063-156,194,798 | AX-130112879 |
| SGCD | rs28750556  | chr5:155,135,063-156,194,798 | AX-148173370 |
| SGCD | rs28750556  | chr5:155,135,063-156,194,798 | AX-149107882 |
| SGCD | rs59232655  | chr5:155,135,063-156,194,798 | AX-148883356 |
| SGCD | rs59232655  | chr5:155,135,063-156,194,798 | AX-156284085 |
| SGCD | rs249875    | chr5:155,135,063-156,194,798 | AX-153227221 |
| SGCD | rs249875    | chr5:155,135,063-156,194,798 | AX-156268232 |
| SGCD | rs30273     | chr5:155,135,063-156,194,798 | AX-14942792  |
| SGCD | rs30274     | chr5:155,135,063-156,194,798 | AX-14942797  |
| SGCD | rs75940341  | chr5:155,135,063-156,194,798 | AX-14942800  |
| SGCD | rs30275     | chr5:155,135,063-156,194,798 | AX-14942805  |
| SGCD | rs249877    | chr5:155,135,063-156,194,798 | AX-14942806  |
| SGCD | rs249894    | chr5:155,135,063-156,194,798 | AX-147998027 |
| SGCD | rs249894    | chr5:155,135,063-156,194,798 | AX-153811297 |
| SGCD | rs249892    | chr5:155,135,063-156,194,798 | AX-41644293  |
| SGCD | rs249891    | chr5:155,135,063-156,194,798 | AX-14942807  |
| SGCD | rs2312058   | chr5:155,135,063-156,194,798 | AX-148180451 |
| SGCD | rs2312058   | chr5:155,135,063-156,194,798 | AX-148370058 |
| SGCD | rs249890    | chr5:155,135,063-156,194,798 | AX-156275587 |
| SGCD | rs249890    | chr5:155,135,063-156,194,798 | AX-92858174  |
| SGCD | rs249889    | chr5:155,135,063-156,194,798 | AX-120238670 |
| SGCD | rs249889    | chr5:155,135,063-156,194,798 | AX-156275588 |
| SGCD | rs189692026 | chr5:155,135,063-156,194,798 | AX-113772039 |
| SGCD | rs189692026 | chr5:155,135,063-156,194,798 | AX-156292751 |
| SGCD | rs249888    | chr5:155,135,063-156,194,798 | AX-11395142  |
| SGCD | rs57499459  | chr5:155,135,063-156,194,798 | AX-14942813  |
| SGCD | rs70982001  | chr5:155,135,063-156,194,798 | AX-153284949 |
| SGCD | rs70982001  | chr5:155,135,063-156,194,798 | AX-156284281 |
| SGCD | rs17053358  | chr5:155,135,063-156,194,798 | AX-12487885  |
| SGCD | rs62382677  | chr5:155,135,063-156,194,798 | AX-14942815  |

|      |             |                              |              |
|------|-------------|------------------------------|--------------|
| SGCD | rs17053360  | chr5:155,135,063-156,194,798 | AX-14942817  |
| SGCD | rs30282     | chr5:155,135,063-156,194,798 | AX-11432267  |
| SGCD | rs187495    | chr5:155,135,063-156,194,798 | AX-12508521  |
| SGCD | rs30281     | chr5:155,135,063-156,194,798 | AX-14942820  |
| SGCD | rs30280     | chr5:155,135,063-156,194,798 | AX-14942821  |
| SGCD | rs4704996   | chr5:155,135,063-156,194,798 | AX-14942822  |
| SGCD | rs4704997   | chr5:155,135,063-156,194,798 | AX-14942823  |
| SGCD | rs62382678  | chr5:155,135,063-156,194,798 | AX-14942824  |
| SGCD | rs62382679  | chr5:155,135,063-156,194,798 | AX-14942825  |
| SGCD | rs62382681  | chr5:155,135,063-156,194,798 | AX-148237686 |
| SGCD | rs62382681  | chr5:155,135,063-156,194,798 | AX-156268233 |
| SGCD | rs13354310  | chr5:155,135,063-156,194,798 | AX-14942826  |
| SGCD | rs17053370  | chr5:155,135,063-156,194,798 | AX-12487886  |
| SGCD | rs114395809 | chr5:155,135,063-156,194,798 | AX-14942827  |
| SGCD | rs2033208   | chr5:155,135,063-156,194,798 | AX-14942831  |
| SGCD | rs139241635 | chr5:155,135,063-156,194,798 | AX-113235502 |
| SGCD | rs139241635 | chr5:155,135,063-156,194,798 | AX-156284086 |
| SGCD | rs1896632   | chr5:155,135,063-156,194,798 | AX-35169343  |
| SGCD | rs1896631   | chr5:155,135,063-156,194,798 | AX-41644301  |
| SGCD | rs112337099 | chr5:155,135,063-156,194,798 | AX-119334082 |
| SGCD | rs2033207   | chr5:155,135,063-156,194,798 | AX-12514574  |
| SGCD | rs10075212  | chr5:155,135,063-156,194,798 | AX-14942835  |
| SGCD | rs4235721   | chr5:155,135,063-156,194,798 | AX-14942837  |
| SGCD | rs4704998   | chr5:155,135,063-156,194,798 | AX-41644303  |
| SGCD | rs1593883   | chr5:155,135,063-156,194,798 | AX-148217061 |
| SGCD | rs1593883   | chr5:155,135,063-156,194,798 | AX-156275589 |
| SGCD | rs1428135   | chr5:155,135,063-156,194,798 | AX-156275590 |
| SGCD | rs1428135   | chr5:155,135,063-156,194,798 | AX-156292752 |
| SGCD | rs6556512   | chr5:155,135,063-156,194,798 | AX-14942839  |
| SGCD | rs4560532   | chr5:155,135,063-156,194,798 | AX-156275591 |
| SGCD | rs4560532   | chr5:155,135,063-156,194,798 | AX-156292753 |
| SGCD | rs6556514   | chr5:155,135,063-156,194,798 | AX-14942844  |
| SGCD | rs10058777  | chr5:155,135,063-156,194,798 | AX-14942845  |
| SGCD | rs10593621  | chr5:155,135,063-156,194,798 | AX-156285763 |
| SGCD | rs7725829   | chr5:155,135,063-156,194,798 | AX-14942847  |
| SGCD | rs1428139   | chr5:155,135,063-156,194,798 | AX-14942848  |
| SGCD | rs10062793  | chr5:155,135,063-156,194,798 | AX-156268234 |
| SGCD | rs10062793  | chr5:155,135,063-156,194,798 | AX-156288077 |
| SGCD | rs1121854   | chr5:155,135,063-156,194,798 | AX-156268235 |
| SGCD | rs1121854   | chr5:155,135,063-156,194,798 | AX-156288078 |
| SGCD | rs60559509  | chr5:155,135,063-156,194,798 | AX-156296961 |
| SGCD | rs4134197   | chr5:155,135,063-156,194,798 | AX-14942853  |
| SGCD | rs61215787  | chr5:155,135,063-156,194,798 | AX-14942855  |
| SGCD | rs12653936  | chr5:155,135,063-156,194,798 | AX-14942857  |
| SGCD | rs34501775  | chr5:155,135,063-156,194,798 | AX-41644315  |
| SGCD | rs1346486   | chr5:155,135,063-156,194,798 | AX-14942861  |
| SGCD | rs73811554  | chr5:155,135,063-156,194,798 | AX-14942864  |
| SGCD | rs10038926  | chr5:155,135,063-156,194,798 | AX-156292755 |
| SGCD | rs2312059   | chr5:155,135,063-156,194,798 | AX-11384321  |
| SGCD | rs56874129  | chr5:155,135,063-156,194,798 | AX-156292756 |
| SGCD | rs1593885   | chr5:155,135,063-156,194,798 | AX-156275595 |
| SGCD | rs1593885   | chr5:155,135,063-156,194,798 | AX-156292757 |
| SGCD | rs1593884   | chr5:155,135,063-156,194,798 | AX-156275596 |
| SGCD | rs1593884   | chr5:155,135,063-156,194,798 | AX-156292758 |
| SGCD | rs1834945   | chr5:155,135,063-156,194,798 | AX-156275597 |

|      |             |                              |              |
|------|-------------|------------------------------|--------------|
| SGCD | rs1834945   | chr5:155,135,063-156,194,798 | AX-156292759 |
| SGCD | rs35052017  | chr5:155,135,063-156,194,798 | AX-35169375  |
| SGCD | rs4461618   | chr5:155,135,063-156,194,798 | AX-156275598 |
| SGCD | rs4461618   | chr5:155,135,063-156,194,798 | AX-156292760 |
| SGCD | rs972324    | chr5:155,135,063-156,194,798 | AX-156268236 |
| SGCD | rs972324    | chr5:155,135,063-156,194,798 | AX-156288079 |
| SGCD | rs1366228   | chr5:155,135,063-156,194,798 | AX-14942872  |
| SGCD | rs6866397   | chr5:155,135,063-156,194,798 | AX-147840386 |
| SGCD | rs6866397   | chr5:155,135,063-156,194,798 | AX-147934522 |
| SGCD | rs4555777   | chr5:155,135,063-156,194,798 | AX-11510966  |
| SGCD | rs17053376  | chr5:155,135,063-156,194,798 | AX-156282313 |
| SGCD | rs115251155 | chr5:155,135,063-156,194,798 | AX-14942877  |
| SGCD | rs17628942  | chr5:155,135,063-156,194,798 | AX-14942878  |
| SGCD | rs17053378  | chr5:155,135,063-156,194,798 | AX-41644337  |
| SGCD | rs12513679  | chr5:155,135,063-156,194,798 | AX-156292761 |
| SGCD | rs13170433  | chr5:155,135,063-156,194,798 | AX-41644343  |
| SGCD | rs10060287  | chr5:155,135,063-156,194,798 | AX-156275600 |
| SGCD | rs10515734  | chr5:155,135,063-156,194,798 | AX-14942882  |
| SGCD | rs143810910 | chr5:155,135,063-156,194,798 | AX-153340623 |
| SGCD | rs143810910 | chr5:155,135,063-156,194,798 | AX-156286437 |
| SGCD | rs12716365  | chr5:155,135,063-156,194,798 | AX-156275601 |
| SGCD | rs12716365  | chr5:155,135,063-156,194,798 | AX-156292763 |
| SGCD | rs12517231  | chr5:155,135,063-156,194,798 | AX-148453253 |
| SGCD | rs12517231  | chr5:155,135,063-156,194,798 | AX-156275602 |
| SGCD | rs116357544 | chr5:155,135,063-156,194,798 | AX-148588868 |
| SGCD | rs116357544 | chr5:155,135,063-156,194,798 | AX-156269266 |
| SGCD | rs12187758  | chr5:155,135,063-156,194,798 | AX-122375624 |
| SGCD | rs113997386 | chr5:155,135,063-156,194,798 | AX-120470350 |
| SGCD | rs113997386 | chr5:155,135,063-156,194,798 | AX-148389626 |
| SGCD | rs73302651  | chr5:155,135,063-156,194,798 | AX-156275603 |
| SGCD | rs11953745  | chr5:155,135,063-156,194,798 | AX-156275604 |
| SGCD | rs11953745  | chr5:155,135,063-156,194,798 | AX-156292764 |
| SGCD | rs12716369  | chr5:155,135,063-156,194,798 | AX-156275605 |
| SGCD | rs12716370  | chr5:155,135,063-156,194,798 | AX-148430462 |
| SGCD | rs12716370  | chr5:155,135,063-156,194,798 | AX-156275606 |
| SGCD | rs34676117  | chr5:155,135,063-156,194,798 | AX-107832603 |
| SGCD | rs34676117  | chr5:155,135,063-156,194,798 | AX-156298348 |
| SGCD | rs7341071   | chr5:155,135,063-156,194,798 | AX-14942887  |
| SGCD | rs73302655  | chr5:155,135,063-156,194,798 | AX-14942893  |
| SGCD | rs12657973  | chr5:155,135,063-156,194,798 | AX-156268237 |
| SGCD | rs12657973  | chr5:155,135,063-156,194,798 | AX-156288080 |
| SGCD | ---         | chr5:155,135,063-156,194,798 | AX-35169397  |
| SGCD | rs12655476  | chr5:155,135,063-156,194,798 | AX-14942894  |
| SGCD | rs75300904  | chr5:155,135,063-156,194,798 | AX-38254185  |
| SGCD | rs78835680  | chr5:155,135,063-156,194,798 | AX-35169399  |
| SGCD | rs62383776  | chr5:155,135,063-156,194,798 | AX-14942896  |
| SGCD | rs76887603  | chr5:155,135,063-156,194,798 | AX-14942897  |
| SGCD | rs143174874 | chr5:155,135,063-156,194,798 | AX-156284385 |
| SGCD | rs13153827  | chr5:155,135,063-156,194,798 | AX-156282314 |
| SGCD | rs13153827  | chr5:155,135,063-156,194,798 | AX-156296963 |
| SGCD | rs17553409  | chr5:155,135,063-156,194,798 | AX-14942901  |
| SGCD | rs10066281  | chr5:155,135,063-156,194,798 | AX-41644353  |
| SGCD | rs6865821   | chr5:155,135,063-156,194,798 | AX-35169409  |
| SGCD | ---         | chr5:155,135,063-156,194,798 | AX-35169411  |
| SGCD | rs10068407  | chr5:155,135,063-156,194,798 | AX-41644355  |

|      |             |                              |              |
|------|-------------|------------------------------|--------------|
| SGCD | rs10059484  | chr5:155,135,063-156,194,798 | AX-14942909  |
| SGCD | rs56282784  | chr5:155,135,063-156,194,798 | AX-14942910  |
| SGCD | rs10065545  | chr5:155,135,063-156,194,798 | AX-11090521  |
| SGCD | rs1504932   | chr5:155,135,063-156,194,798 | AX-14942912  |
| SGCD | rs10061360  | chr5:155,135,063-156,194,798 | AX-41644357  |
| SGCD | rs11956108  | chr5:155,135,063-156,194,798 | AX-12424089  |
| SGCD | rs73811576  | chr5:155,135,063-156,194,798 | AX-14942914  |
| SGCD | rs988686    | chr5:155,135,063-156,194,798 | AX-41644361  |
| SGCD | rs10074679  | chr5:155,135,063-156,194,798 | AX-14942919  |
| SGCD | rs57752082  | chr5:155,135,063-156,194,798 | AX-14942923  |
| SGCD | rs73811577  | chr5:155,135,063-156,194,798 | AX-14942926  |
| SGCD | rs73811578  | chr5:155,135,063-156,194,798 | AX-14942928  |
| SGCD | rs11370605  | chr5:155,135,063-156,194,798 | AX-156275607 |
| SGCD | rs201189503 | chr5:155,135,063-156,194,798 | AX-120624769 |
| SGCD | rs60202362  | chr5:155,135,063-156,194,798 | AX-156282315 |
| SGCD | rs60202362  | chr5:155,135,063-156,194,798 | AX-156296964 |
| SGCD | rs61271334  | chr5:155,135,063-156,194,798 | AX-156282316 |
| SGCD | rs61271334  | chr5:155,135,063-156,194,798 | AX-156296965 |
| SGCD | rs17553613  | chr5:155,135,063-156,194,798 | AX-35169419  |
| SGCD | rs57539502  | chr5:155,135,063-156,194,798 | AX-14942934  |
| SGCD | rs10064971  | chr5:155,135,063-156,194,798 | AX-11090471  |
| SGCD | rs62383781  | chr5:155,135,063-156,194,798 | AX-148548294 |
| SGCD | rs62383781  | chr5:155,135,063-156,194,798 | AX-156284087 |
| SGCD | rs182900273 | chr5:155,135,063-156,194,798 | AX-105103062 |
| SGCD | rs182900273 | chr5:155,135,063-156,194,798 | AX-105103063 |
| SGCD | rs6879742   | chr5:155,135,063-156,194,798 | AX-149047780 |
| SGCD | rs6879742   | chr5:155,135,063-156,194,798 | AX-96742525  |
| SGCD | rs6864200   | chr5:155,135,063-156,194,798 | AX-120889774 |
| SGCD | rs6864200   | chr5:155,135,063-156,194,798 | AX-156292765 |
| SGCD | rs6864242   | chr5:155,135,063-156,194,798 | AX-148490498 |
| SGCD | rs6864242   | chr5:155,135,063-156,194,798 | AX-151755869 |
| SGCD | rs187508610 | chr5:155,135,063-156,194,798 | AX-120088582 |
| SGCD | rs187508610 | chr5:155,135,063-156,194,798 | AX-148456651 |
| SGCD | rs147140950 | chr5:155,135,063-156,194,798 | AX-151375356 |
| SGCD | rs147140950 | chr5:155,135,063-156,194,798 | AX-156284088 |
| SGCD | rs12523569  | chr5:155,135,063-156,194,798 | AX-151300728 |
| SGCD | rs12523569  | chr5:155,135,063-156,194,798 | AX-156284089 |
| SGCD | rs76535153  | chr5:155,135,063-156,194,798 | AX-148712230 |
| SGCD | rs76535153  | chr5:155,135,063-156,194,798 | AX-156284090 |
| SGCD | rs10071376  | chr5:155,135,063-156,194,798 | AX-41644369  |
| SGCD | rs12657569  | chr5:155,135,063-156,194,798 | AX-14942937  |
| SGCD | rs10050429  | chr5:155,135,063-156,194,798 | AX-41644371  |
| SGCD | rs10052410  | chr5:155,135,063-156,194,798 | AX-11089704  |
| SGCD | rs12658724  | chr5:155,135,063-156,194,798 | AX-14942940  |
| SGCD | rs17053396  | chr5:155,135,063-156,194,798 | AX-11301510  |
| SGCD | rs71672922  | chr5:155,135,063-156,194,798 | AX-151262722 |
| SGCD | rs71672922  | chr5:155,135,063-156,194,798 | AX-156286072 |
| SGCD | rs17053400  | chr5:155,135,063-156,194,798 | AX-41644375  |
| SGCD | rs10077764  | chr5:155,135,063-156,194,798 | AX-12380624  |
| SGCD | rs6887144   | chr5:155,135,063-156,194,798 | AX-156268239 |
| SGCD | rs6887144   | chr5:155,135,063-156,194,798 | AX-156288082 |
| SGCD | rs72811747  | chr5:155,135,063-156,194,798 | AX-14942948  |
| SGCD | rs2174420   | chr5:155,135,063-156,194,798 | AX-156288083 |
| SGCD | rs2135033   | chr5:155,135,063-156,194,798 | AX-41644379  |
| SGCD | rs2312060   | chr5:155,135,063-156,194,798 | AX-41644381  |



|      |             |                              |              |
|------|-------------|------------------------------|--------------|
| SGCD | rs10054153  | chr5:155,135,063-156,194,798 | AX-156268241 |
| SGCD | rs10054153  | chr5:155,135,063-156,194,798 | AX-156288084 |
| SGCD | rs10054192  | chr5:155,135,063-156,194,798 | AX-156268242 |
| SGCD | rs10054192  | chr5:155,135,063-156,194,798 | AX-156288085 |
| SGCD | rs9885248   | chr5:155,135,063-156,194,798 | AX-35169427  |
| SGCD | rs2089189   | chr5:155,135,063-156,194,798 | AX-156282317 |
| SGCD | rs2089189   | chr5:155,135,063-156,194,798 | AX-156296966 |
| SGCD | rs2312061   | chr5:155,135,063-156,194,798 | AX-12525657  |
| SGCD | rs34232746  | chr5:155,135,063-156,194,798 | AX-156285370 |
| SGCD | rs78679437  | chr5:155,135,063-156,194,798 | AX-156268243 |
| SGCD | rs78679437  | chr5:155,135,063-156,194,798 | AX-156288086 |
| SGCD | rs1604960   | chr5:155,135,063-156,194,798 | AX-11278462  |
| SGCD | rs55805499  | chr5:155,135,063-156,194,798 | AX-14942959  |
| SGCD | rs397515714 | chr5:155,135,063-156,194,798 | AX-156285101 |
| SGCD | rs182881432 | chr5:155,135,063-156,194,798 | AX-105100966 |
| SGCD | rs182881432 | chr5:155,135,063-156,194,798 | AX-96656038  |
| SGCD | rs192170911 | chr5:155,135,063-156,194,798 | AX-120302901 |
| SGCD | rs192170911 | chr5:155,135,063-156,194,798 | AX-120722574 |
| SGCD | rs182712075 | chr5:155,135,063-156,194,798 | AX-119748218 |
| SGCD | rs182712075 | chr5:155,135,063-156,194,798 | AX-156284091 |
| SGCD | rs34887087  | chr5:155,135,063-156,194,798 | AX-11454674  |
| SGCD | rs6878121   | chr5:155,135,063-156,194,798 | AX-156268245 |
| SGCD | rs6878121   | chr5:155,135,063-156,194,798 | AX-156288087 |
| SGCD | rs13358565  | chr5:155,135,063-156,194,798 | AX-156288088 |
| SGCD | rs28826428  | chr5:155,135,063-156,194,798 | AX-148184800 |
| SGCD | rs28826428  | chr5:155,135,063-156,194,798 | AX-156268247 |
| SGCD | rs79876175  | chr5:155,135,063-156,194,798 | AX-14942969  |
| SGCD | rs36049454  | chr5:155,135,063-156,194,798 | AX-120891353 |
| SGCD | rs36049454  | chr5:155,135,063-156,194,798 | AX-156282318 |
| SGCD | rs1604961   | chr5:155,135,063-156,194,798 | AX-156282319 |
| SGCD | rs1604961   | chr5:155,135,063-156,194,798 | AX-156296967 |
| SGCD | rs73811589  | chr5:155,135,063-156,194,798 | AX-156282320 |
| SGCD | rs62380676  | chr5:155,135,063-156,194,798 | AX-156275608 |
| SGCD | rs62380676  | chr5:155,135,063-156,194,798 | AX-156292766 |
| SGCD | rs1580927   | chr5:155,135,063-156,194,798 | AX-14942974  |
| SGCD | ---         | chr5:155,135,063-156,194,798 | AX-156278662 |
| SGCD | ---         | chr5:155,135,063-156,194,798 | AX-156294866 |
| SGCD | rs10063909  | chr5:155,135,063-156,194,798 | AX-35169447  |
| SGCD | rs6556541   | chr5:155,135,063-156,194,798 | AX-156288090 |
| SGCD | rs2221439   | chr5:155,135,063-156,194,798 | AX-151190625 |
| SGCD | rs2221439   | chr5:155,135,063-156,194,798 | AX-156268250 |
| SGCD | rs2202432   | chr5:155,135,063-156,194,798 | AX-151271331 |
| SGCD | rs2202432   | chr5:155,135,063-156,194,798 | AX-156284092 |
| SGCD | rs2102285   | chr5:155,135,063-156,194,798 | AX-156268251 |
| SGCD | rs114902158 | chr5:155,135,063-156,194,798 | AX-148305386 |
| SGCD | rs114902158 | chr5:155,135,063-156,194,798 | AX-148719319 |
| SGCD | rs72813859  | chr5:155,135,063-156,194,798 | AX-156288091 |
| SGCD | rs141393998 | chr5:155,135,063-156,194,798 | AX-151384324 |
| SGCD | rs141393998 | chr5:155,135,063-156,194,798 | AX-156284301 |
| SGCD | rs202032391 | chr5:155,135,063-156,194,798 | AX-148184451 |
| SGCD | rs202032391 | chr5:155,135,063-156,194,798 | AX-151434519 |
| SGCD | rs2135034   | chr5:155,135,063-156,194,798 | AX-148179921 |
| SGCD | rs2135034   | chr5:155,135,063-156,194,798 | AX-156268253 |
| SGCD | rs2135035   | chr5:155,135,063-156,194,798 | AX-148189280 |
| SGCD | rs2135035   | chr5:155,135,063-156,194,798 | AX-156268254 |

|      |             |                              |              |
|------|-------------|------------------------------|--------------|
| SGCD | rs7704662   | chr5:155,135,063-156,194,798 | AX-41644395  |
| SGCD | rs201510325 | chr5:155,135,063-156,194,798 | AX-119630896 |
| SGCD | rs201510325 | chr5:155,135,063-156,194,798 | AX-84630771  |
| SGCD | rs143136453 | chr5:155,135,063-156,194,798 | AX-121079258 |
| SGCD | rs143136453 | chr5:155,135,063-156,194,798 | AX-148317683 |
| SGCD | rs76362912  | chr5:155,135,063-156,194,798 | AX-156282321 |
| SGCD | rs76362912  | chr5:155,135,063-156,194,798 | AX-156296969 |
| SGCD | rs2135036   | chr5:155,135,063-156,194,798 | AX-14942988  |
| SGCD | rs2135037   | chr5:155,135,063-156,194,798 | AX-14942990  |
| SGCD | rs1504940   | chr5:155,135,063-156,194,798 | AX-14942991  |
| SGCD | rs116356591 | chr5:155,135,063-156,194,798 | AX-14942992  |
| SGCD | rs1504942   | chr5:155,135,063-156,194,798 | AX-14942994  |
| SGCD | rs76245178  | chr5:155,135,063-156,194,798 | AX-14942996  |
| SGCD | ---         | chr5:155,135,063-156,194,798 | AX-156285873 |
| SGCD | rs6556545   | chr5:155,135,063-156,194,798 | AX-156268256 |
| SGCD | rs7737496   | chr5:155,135,063-156,194,798 | AX-11642104  |
| SGCD | rs11744424  | chr5:155,135,063-156,194,798 | AX-41644403  |
| SGCD | rs10044520  | chr5:155,135,063-156,194,798 | AX-41644405  |
| SGCD | rs6898100   | chr5:155,135,063-156,194,798 | AX-156288093 |
| SGCD | rs1604962   | chr5:155,135,063-156,194,798 | AX-156268258 |
| SGCD | rs1604962   | chr5:155,135,063-156,194,798 | AX-156288094 |
| SGCD | rs7710388   | chr5:155,135,063-156,194,798 | AX-156268259 |
| SGCD | rs7710388   | chr5:155,135,063-156,194,798 | AX-156288095 |
| SGCD | rs1857768   | chr5:155,135,063-156,194,798 | AX-14943003  |
| SGCD | rs4705000   | chr5:155,135,063-156,194,798 | AX-14943005  |
| SGCD | rs10463088  | chr5:155,135,063-156,194,798 | AX-41644415  |
| SGCD | rs74973159  | chr5:155,135,063-156,194,798 | AX-14943009  |
| SGCD | rs4704790   | chr5:155,135,063-156,194,798 | AX-148195917 |
| SGCD | rs4704790   | chr5:155,135,063-156,194,798 | AX-156275609 |
| SGCD | rs6885958   | chr5:155,135,063-156,194,798 | AX-148101100 |
| SGCD | rs6885958   | chr5:155,135,063-156,194,798 | AX-156275610 |
| SGCD | rs6886148   | chr5:155,135,063-156,194,798 | AX-148118954 |
| SGCD | rs112872065 | chr5:155,135,063-156,194,798 | AX-148725217 |
| SGCD | rs4705001   | chr5:155,135,063-156,194,798 | AX-14943011  |
| SGCD | rs113789074 | chr5:155,135,063-156,194,798 | AX-14943012  |
| SGCD | rs74953545  | chr5:155,135,063-156,194,798 | AX-156275611 |
| SGCD | rs74953545  | chr5:155,135,063-156,194,798 | AX-156292767 |
| SGCD | rs6875001   | chr5:155,135,063-156,194,798 | AX-41644419  |
| SGCD | rs6875169   | chr5:155,135,063-156,194,798 | AX-11591443  |
| SGCD | rs10045825  | chr5:155,135,063-156,194,798 | AX-156275612 |
| SGCD | rs7736412   | chr5:155,135,063-156,194,798 | AX-14943020  |
| SGCD | rs7737383   | chr5:155,135,063-156,194,798 | AX-119554053 |
| SGCD | rs7737383   | chr5:155,135,063-156,194,798 | AX-156275613 |
| SGCD | rs7730533   | chr5:155,135,063-156,194,798 | AX-120399535 |
| SGCD | rs10038955  | chr5:155,135,063-156,194,798 | AX-41644427  |
| SGCD | rs74418250  | chr5:155,135,063-156,194,798 | AX-156268261 |
| SGCD | rs74418250  | chr5:155,135,063-156,194,798 | AX-156288096 |
| SGCD | rs75817468  | chr5:155,135,063-156,194,798 | AX-14943023  |
| SGCD | rs115677644 | chr5:155,135,063-156,194,798 | AX-14943024  |
| SGCD | rs4705002   | chr5:155,135,063-156,194,798 | AX-11519468  |
| SGCD | rs4235722   | chr5:155,135,063-156,194,798 | AX-14943025  |
| SGCD | rs77956244  | chr5:155,135,063-156,194,798 | AX-14943027  |
| SGCD | rs7737367   | chr5:155,135,063-156,194,798 | AX-41644429  |
| SGCD | rs34400642  | chr5:155,135,063-156,194,798 | AX-120142706 |
| SGCD | rs11738065  | chr5:155,135,063-156,194,798 | AX-14943028  |

|      |             |                              |              |
|------|-------------|------------------------------|--------------|
| SGCD | rs4705003   | chr5:155,135,063-156,194,798 | AX-14943031  |
| SGCD | rs7729633   | chr5:155,135,063-156,194,798 | AX-11641603  |
| SGCD | rs77723579  | chr5:155,135,063-156,194,798 | AX-14943034  |
| SGCD | rs10057826  | chr5:155,135,063-156,194,798 | AX-156275614 |
| SGCD | rs10057826  | chr5:155,135,063-156,194,798 | AX-156292769 |
| SGCD | rs10058119  | chr5:155,135,063-156,194,798 | AX-156275615 |
| SGCD | rs10058119  | chr5:155,135,063-156,194,798 | AX-156292770 |
| SGCD | rs76169209  | chr5:155,135,063-156,194,798 | AX-14943038  |
| SGCD | rs7724969   | chr5:155,135,063-156,194,798 | AX-41644435  |
| SGCD | rs13170573  | chr5:155,135,063-156,194,798 | AX-156275616 |
| SGCD | rs13170573  | chr5:155,135,063-156,194,798 | AX-156292771 |
| SGCD | rs17554270  | chr5:155,135,063-156,194,798 | AX-14943045  |
| SGCD | rs7713117   | chr5:155,135,063-156,194,798 | AX-41644443  |
| SGCD | rs73304431  | chr5:155,135,063-156,194,798 | AX-35169489  |
| SGCD | rs10064593  | chr5:155,135,063-156,194,798 | AX-156292772 |
| SGCD | rs11744154  | chr5:155,135,063-156,194,798 | AX-14943047  |
| SGCD | rs11740347  | chr5:155,135,063-156,194,798 | AX-14943049  |
| SGCD | rs10447212  | chr5:155,135,063-156,194,798 | AX-156275618 |
| SGCD | rs10447212  | chr5:155,135,063-156,194,798 | AX-92620672  |
| SGCD | rs142576328 | chr5:155,135,063-156,194,798 | AX-148656630 |
| SGCD | rs142576328 | chr5:155,135,063-156,194,798 | AX-156284093 |
| SGCD | rs60426853  | chr5:155,135,063-156,194,798 | AX-156284094 |
| SGCD | rs4704791   | chr5:155,135,063-156,194,798 | AX-14943054  |
| SGCD | rs4704792   | chr5:155,135,063-156,194,798 | AX-14943057  |
| SGCD | rs75194700  | chr5:155,135,063-156,194,798 | AX-14943058  |
| SGCD | rs4705004   | chr5:155,135,063-156,194,798 | AX-11519469  |
| SGCD | rs149207751 | chr5:155,135,063-156,194,798 | AX-120369387 |
| SGCD | rs149207751 | chr5:155,135,063-156,194,798 | AX-156298104 |
| SGCD | rs4705005   | chr5:155,135,063-156,194,798 | AX-14943061  |
| SGCD | rs78000700  | chr5:155,135,063-156,194,798 | AX-14943062  |
| SGCD | rs4705006   | chr5:155,135,063-156,194,798 | AX-14943063  |
| SGCD | rs1354565   | chr5:155,135,063-156,194,798 | AX-12459350  |
| SGCD | rs1394605   | chr5:155,135,063-156,194,798 | AX-156292773 |
| SGCD | rs1394606   | chr5:155,135,063-156,194,798 | AX-50848678  |
| SGCD | rs1948863   | chr5:155,135,063-156,194,798 | AX-156275620 |
| SGCD | rs79672495  | chr5:155,135,063-156,194,798 | AX-14943067  |
| SGCD | rs79179968  | chr5:155,135,063-156,194,798 | AX-14943072  |
| SGCD | rs6893125   | chr5:155,135,063-156,194,798 | AX-14943077  |
| SGCD | rs4705007   | chr5:155,135,063-156,194,798 | AX-14943080  |
| SGCD | rs4705008   | chr5:155,135,063-156,194,798 | AX-14943081  |
| SGCD | rs78571373  | chr5:155,135,063-156,194,798 | AX-14943083  |
| SGCD | rs10462927  | chr5:155,135,063-156,194,798 | AX-35169493  |
| SGCD | rs72813885  | chr5:155,135,063-156,194,798 | AX-14943085  |
| SGCD | rs13160261  | chr5:155,135,063-156,194,798 | AX-35169495  |
| SGCD | rs1354566   | chr5:155,135,063-156,194,798 | AX-156275621 |
| SGCD | rs1354566   | chr5:155,135,063-156,194,798 | AX-156292775 |
| SGCD | rs10061194  | chr5:155,135,063-156,194,798 | AX-156282323 |
| SGCD | rs10061194  | chr5:155,135,063-156,194,798 | AX-156296971 |
| SGCD | rs73815031  | chr5:155,135,063-156,194,798 | AX-14943090  |
| SGCD | rs10039835  | chr5:155,135,063-156,194,798 | AX-11088940  |
| SGCD | rs10042069  | chr5:155,135,063-156,194,798 | AX-12379471  |
| SGCD | rs4704793   | chr5:155,135,063-156,194,798 | AX-14943093  |
| SGCD | rs74940388  | chr5:155,135,063-156,194,798 | AX-14943094  |
| SGCD | rs60947826  | chr5:155,135,063-156,194,798 | AX-35169499  |
| SGCD | rs10074370  | chr5:155,135,063-156,194,798 | AX-147828730 |

|      |             |                              |              |
|------|-------------|------------------------------|--------------|
| SGCD | rs149320789 | chr5:155,135,063-156,194,798 | AX-151363102 |
| SGCD | rs10065774  | chr5:155,135,063-156,194,798 | AX-14943100  |
| SGCD | rs6888978   | chr5:155,135,063-156,194,798 | AX-41644461  |
| SGCD | rs147489698 | chr5:155,135,063-156,194,798 | AX-121393271 |
| SGCD | rs147489698 | chr5:155,135,063-156,194,798 | AX-156284479 |
| SGCD | rs2135038   | chr5:155,135,063-156,194,798 | AX-14943103  |
| SGCD | rs4394110   | chr5:155,135,063-156,194,798 | AX-41644463  |
| SGCD | rs80146179  | chr5:155,135,063-156,194,798 | AX-35169501  |
| SGCD | rs2135039   | chr5:155,135,063-156,194,798 | AX-14943104  |
| SGCD | rs201754678 | chr5:155,135,063-156,194,798 | AX-151155398 |
| SGCD | rs6894973   | chr5:155,135,063-156,194,798 | AX-14943108  |
| SGCD | rs78308722  | chr5:155,135,063-156,194,798 | AX-14943111  |
| SGCD | rs1857770   | chr5:155,135,063-156,194,798 | AX-11347216  |
| SGCD | rs17053449  | chr5:155,135,063-156,194,798 | AX-156282324 |
| SGCD | rs17053449  | chr5:155,135,063-156,194,798 | AX-156296972 |
| SGCD | rs7725923   | chr5:155,135,063-156,194,798 | AX-14943115  |
| SGCD | rs2871924   | chr5:155,135,063-156,194,798 | AX-41644469  |
| SGCD | ---         | chr5:155,135,063-156,194,798 | AX-156282325 |
| SGCD | ---         | chr5:155,135,063-156,194,798 | AX-156296973 |
| SGCD | rs7714142   | chr5:155,135,063-156,194,798 | AX-14943116  |
| SGCD | rs6556552   | chr5:155,135,063-156,194,798 | AX-14943117  |
| SGCD | rs8180473   | chr5:155,135,063-156,194,798 | AX-35169511  |
| SGCD | ---         | chr5:155,135,063-156,194,798 | AX-156284709 |
| SGCD | rs1801193   | chr5:155,135,063-156,194,798 | AX-14943120  |
| SGCD | rs200476861 | chr5:155,135,063-156,194,798 | AX-83418775  |
| SGCD | rs4434364   | chr5:155,135,063-156,194,798 | AX-35169515  |
| SGCD | rs9313890   | chr5:155,135,063-156,194,798 | AX-41644471  |
| SGCD | rs566287615 | chr5:155,135,063-156,194,798 | AX-151470445 |
| SGCD | rs566287615 | chr5:155,135,063-156,194,798 | AX-156286168 |
| SGCD | rs6892761   | chr5:155,135,063-156,194,798 | AX-35169517  |
| SGCD | rs2055608   | chr5:155,135,063-156,194,798 | AX-12515647  |
| SGCD | rs11307716  | chr5:155,135,063-156,194,798 | AX-14943123  |
| SGCD | rs11750080  | chr5:155,135,063-156,194,798 | AX-14943124  |
| SGCD | rs11748820  | chr5:155,135,063-156,194,798 | AX-151174490 |
| SGCD | rs11748820  | chr5:155,135,063-156,194,798 | AX-156275623 |
| SGCD | rs4579244   | chr5:155,135,063-156,194,798 | AX-148775590 |
| SGCD | rs4579244   | chr5:155,135,063-156,194,798 | AX-88745718  |
| SGCD | rs4345305   | chr5:155,135,063-156,194,798 | AX-14943125  |
| SGCD | rs1394607   | chr5:155,135,063-156,194,798 | AX-156275624 |
| SGCD | rs78115090  | chr5:155,135,063-156,194,798 | AX-14943128  |
| SGCD | rs13172727  | chr5:155,135,063-156,194,798 | AX-156292777 |
| SGCD | rs6556553   | chr5:155,135,063-156,194,798 | AX-156268262 |
| SGCD | rs6556553   | chr5:155,135,063-156,194,798 | AX-156288097 |
| SGCD | rs12652756  | chr5:155,135,063-156,194,798 | AX-156268263 |
| SGCD | rs12652756  | chr5:155,135,063-156,194,798 | AX-156288098 |
| SGCD | rs12652777  | chr5:155,135,063-156,194,798 | AX-96771730  |
| SGCD | rs12652777  | chr5:155,135,063-156,194,798 | AX-96786770  |
| SGCD | rs1504944   | chr5:155,135,063-156,194,798 | AX-151174190 |
| SGCD | rs1504944   | chr5:155,135,063-156,194,798 | AX-156268264 |
| SGCD | rs10056289  | chr5:155,135,063-156,194,798 | AX-14943134  |
| SGCD | rs2135041   | chr5:155,135,063-156,194,798 | AX-148166057 |
| SGCD | rs2135041   | chr5:155,135,063-156,194,798 | AX-156282326 |
| SGCD | rs2174421   | chr5:155,135,063-156,194,798 | AX-35169535  |
| SGCD | rs77410345  | chr5:155,135,063-156,194,798 | AX-14943136  |
| SGCD | rs76574299  | chr5:155,135,063-156,194,798 | AX-156282327 |

|      |             |                              |              |
|------|-------------|------------------------------|--------------|
| SGCD | rs76574299  | chr5:155,135,063-156,194,798 | AX-156296974 |
| SGCD | rs12153015  | chr5:155,135,063-156,194,798 | AX-14943137  |
| SGCD | rs4404663   | chr5:155,135,063-156,194,798 | AX-156282328 |
| SGCD | rs35935568  | chr5:155,135,063-156,194,798 | AX-14943138  |
| SGCD | rs76012524  | chr5:155,135,063-156,194,798 | AX-14943140  |
| SGCD | rs6872904   | chr5:155,135,063-156,194,798 | AX-14943141  |
| SGCD | rs78463773  | chr5:155,135,063-156,194,798 | AX-14943143  |
| SGCD | rs10037772  | chr5:155,135,063-156,194,798 | AX-14943146  |
| SGCD | rs556167517 | chr5:155,135,063-156,194,798 | AX-151422034 |
| SGCD | rs556167517 | chr5:155,135,063-156,194,798 | AX-156298122 |
| SGCD | rs17053458  | chr5:155,135,063-156,194,798 | AX-41644483  |
| SGCD | rs7447475   | chr5:155,135,063-156,194,798 | AX-41644485  |
| SGCD | rs1504946   | chr5:155,135,063-156,194,798 | AX-14943150  |
| SGCD | rs10059872  | chr5:155,135,063-156,194,798 | AX-14943152  |
| SGCD | rs17555038  | chr5:155,135,063-156,194,798 | AX-14943154  |
| SGCD | rs17053462  | chr5:155,135,063-156,194,798 | AX-14943155  |
| SGCD | rs17053464  | chr5:155,135,063-156,194,798 | AX-14943156  |
| SGCD | rs17053465  | chr5:155,135,063-156,194,798 | AX-11301518  |
| SGCD | rs58533381  | chr5:155,135,063-156,194,798 | AX-120959677 |
| SGCD | rs12514604  | chr5:155,135,063-156,194,798 | AX-14943157  |
| SGCD | rs10044891  | chr5:155,135,063-156,194,798 | AX-41644487  |
| SGCD | rs2036556   | chr5:155,135,063-156,194,798 | AX-14943159  |
| SGCD | rs4704794   | chr5:155,135,063-156,194,798 | AX-14943160  |
| SGCD | rs4094450   | chr5:155,135,063-156,194,798 | AX-41644489  |
| SGCD | rs4235723   | chr5:155,135,063-156,194,798 | AX-11497356  |
| SGCD | rs1394608   | chr5:155,135,063-156,194,798 | AX-14943164  |
| SGCD | rs4288104   | chr5:155,135,063-156,194,798 | AX-35169551  |
| SGCD | rs1394609   | chr5:155,135,063-156,194,798 | AX-35169553  |
| SGCD | rs73815040  | chr5:155,135,063-156,194,798 | AX-14943166  |
| SGCD | rs73815041  | chr5:155,135,063-156,194,798 | AX-14943167  |
| SGCD | rs76499093  | chr5:155,135,063-156,194,798 | AX-14943169  |
| SGCD | rs13182616  | chr5:155,135,063-156,194,798 | AX-14943172  |
| SGCD | rs11743060  | chr5:155,135,063-156,194,798 | AX-156282329 |
| SGCD | ---         | chr5:155,135,063-156,194,798 | AX-12418262  |
| SGCD | rs4704795   | chr5:155,135,063-156,194,798 | AX-14943173  |
| SGCD | rs11135163  | chr5:155,135,063-156,194,798 | AX-41644493  |
| SGCD | rs58520099  | chr5:155,135,063-156,194,798 | AX-14943177  |
| SGCD | rs1394602   | chr5:155,135,063-156,194,798 | AX-14943178  |
| SGCD | rs116076554 | chr5:155,135,063-156,194,798 | AX-35169561  |
| SGCD | rs77552770  | chr5:155,135,063-156,194,798 | AX-14943179  |
| SGCD | rs6860183   | chr5:155,135,063-156,194,798 | AX-156275626 |
| SGCD | rs6860183   | chr5:155,135,063-156,194,798 | AX-156292778 |
| SGCD | rs80261187  | chr5:155,135,063-156,194,798 | AX-156275627 |
| SGCD | rs80261187  | chr5:155,135,063-156,194,798 | AX-156292779 |
| SGCD | rs59973825  | chr5:155,135,063-156,194,798 | AX-14943182  |
| SGCD | rs17053470  | chr5:155,135,063-156,194,798 | AX-14943183  |
| SGCD | rs7706091   | chr5:155,135,063-156,194,798 | AX-11640096  |
| SGCD | rs7714201   | chr5:155,135,063-156,194,798 | AX-11640625  |
| SGCD | rs2014026   | chr5:155,135,063-156,194,798 | AX-35169567  |
| SGCD | rs148532213 | chr5:155,135,063-156,194,798 | AX-148706530 |
| SGCD | rs148532213 | chr5:155,135,063-156,194,798 | AX-156284095 |
| SGCD | rs1813059   | chr5:155,135,063-156,194,798 | AX-148427468 |
| SGCD | rs1813059   | chr5:155,135,063-156,194,798 | AX-148779510 |
| SGCD | rs74435952  | chr5:155,135,063-156,194,798 | AX-14943185  |
| SGCD | rs10043401  | chr5:155,135,063-156,194,798 | AX-147876396 |

|      |             |                              |              |
|------|-------------|------------------------------|--------------|
| SGCD | rs10043401  | chr5:155,135,063-156,194,798 | AX-147970522 |
| SGCD | rs72798928  | chr5:155,135,063-156,194,798 | AX-35169569  |
| SGCD | rs76024207  | chr5:155,135,063-156,194,798 | AX-35169571  |
| SGCD | rs4068396   | chr5:155,135,063-156,194,798 | AX-14943188  |
| SGCD | rs147014804 | chr5:155,135,063-156,194,798 | AX-121317687 |
| SGCD | rs147014804 | chr5:155,135,063-156,194,798 | AX-156284899 |
| SGCD | rs9313897   | chr5:155,135,063-156,194,798 | AX-14943189  |
| SGCD | rs73815049  | chr5:155,135,063-156,194,798 | AX-35169573  |
| SGCD | rs10036928  | chr5:155,135,063-156,194,798 | AX-156268266 |
| SGCD | rs10036928  | chr5:155,135,063-156,194,798 | AX-156288100 |
| SGCD | rs17636636  | chr5:155,135,063-156,194,798 | AX-11332445  |
| SGCD | rs80087683  | chr5:155,135,063-156,194,798 | AX-14943191  |
| SGCD | rs6889255   | chr5:155,135,063-156,194,798 | AX-148446811 |
| SGCD | rs6889255   | chr5:155,135,063-156,194,798 | AX-156268267 |
| SGCD | rs6873000   | chr5:155,135,063-156,194,798 | AX-11591303  |
| SGCD | rs77327847  | chr5:155,135,063-156,194,798 | AX-14943192  |
| SGCD | rs17053477  | chr5:155,135,063-156,194,798 | AX-147804987 |
| SGCD | rs17053477  | chr5:155,135,063-156,194,798 | AX-147898948 |
| SGCD | rs17555767  | chr5:155,135,063-156,194,798 | AX-14943194  |
| SGCD | rs147504894 | chr5:155,135,063-156,194,798 | AX-122584376 |
| SGCD | rs35804717  | chr5:155,135,063-156,194,798 | AX-156282330 |
| SGCD | rs35804717  | chr5:155,135,063-156,194,798 | AX-156296977 |
| SGCD | rs112151431 | chr5:155,135,063-156,194,798 | AX-156282331 |
| SGCD | rs112151431 | chr5:155,135,063-156,194,798 | AX-156296978 |
| SGCD | rs71935610  | chr5:155,135,063-156,194,798 | AX-151169750 |
| SGCD | rs71935610  | chr5:155,135,063-156,194,798 | AX-156286229 |
| SGCD | rs10038418  | chr5:155,135,063-156,194,798 | AX-156292780 |
| SGCD | rs12523127  | chr5:155,135,063-156,194,798 | AX-41644509  |
| SGCD | rs114294828 | chr5:155,135,063-156,194,798 | AX-156275629 |
| SGCD | rs7700863   | chr5:155,135,063-156,194,798 | AX-156275630 |
| SGCD | rs76524654  | chr5:155,135,063-156,194,798 | AX-14943198  |
| SGCD | rs11741970  | chr5:155,135,063-156,194,798 | AX-11172003  |
| SGCD | rs138548425 | chr5:155,135,063-156,194,798 | AX-121816101 |
| SGCD | rs17053484  | chr5:155,135,063-156,194,798 | AX-14943199  |
| SGCD | rs12514194  | chr5:155,135,063-156,194,798 | AX-41644517  |
| SGCD | rs61603347  | chr5:155,135,063-156,194,798 | AX-148157880 |
| SGCD | rs61603347  | chr5:155,135,063-156,194,798 | AX-156284096 |
| SGCD | rs72798934  | chr5:155,135,063-156,194,798 | AX-148409332 |
| SGCD | rs72798934  | chr5:155,135,063-156,194,798 | AX-156275631 |
| SGCD | rs77946635  | chr5:155,135,063-156,194,798 | AX-14943204  |
| SGCD | rs1504926   | chr5:155,135,063-156,194,798 | AX-12466786  |
| SGCD | rs6866394   | chr5:155,135,063-156,194,798 | AX-12612461  |
| SGCD | rs7722282   | chr5:155,135,063-156,194,798 | AX-14943206  |
| SGCD | rs7722398   | chr5:155,135,063-156,194,798 | AX-14943207  |
| SGCD | rs75894030  | chr5:155,135,063-156,194,798 | AX-14943209  |
| SGCD | rs73812207  | chr5:155,135,063-156,194,798 | AX-14943210  |
| SGCD | rs17637007  | chr5:155,135,063-156,194,798 | AX-11332460  |
| SGCD | rs17053491  | chr5:155,135,063-156,194,798 | AX-41644523  |
| SGCD | rs79448192  | chr5:155,135,063-156,194,798 | AX-14943215  |
| SGCD | rs7732608   | chr5:155,135,063-156,194,798 | AX-147793551 |
| SGCD | rs7732608   | chr5:155,135,063-156,194,798 | AX-147887435 |
| SGCD | rs7721793   | chr5:155,135,063-156,194,798 | AX-12638158  |
| SGCD | rs73812209  | chr5:155,135,063-156,194,798 | AX-14943219  |
| SGCD | rs17053495  | chr5:155,135,063-156,194,798 | AX-35169599  |
| SGCD | rs17053497  | chr5:155,135,063-156,194,798 | AX-41644527  |

|      |             |                              |              |
|------|-------------|------------------------------|--------------|
| SGCD | rs9313900   | chr5:155,135,063-156,194,798 | AX-41644529  |
| SGCD | rs13184996  | chr5:155,135,063-156,194,798 | AX-14943223  |
| SGCD | rs72798948  | chr5:155,135,063-156,194,798 | AX-14943224  |
| SGCD | rs7725840   | chr5:155,135,063-156,194,798 | AX-41644531  |
| SGCD | rs113196974 | chr5:155,135,063-156,194,798 | AX-14943226  |
| SGCD | rs115674853 | chr5:155,135,063-156,194,798 | AX-156275632 |
| SGCD | rs115674853 | chr5:155,135,063-156,194,798 | AX-156292783 |
| SGCD | rs13355607  | chr5:155,135,063-156,194,798 | AX-156275633 |
| SGCD | rs13355607  | chr5:155,135,063-156,194,798 | AX-92528617  |
| SGCD | rs1967228   | chr5:155,135,063-156,194,798 | AX-35169605  |
| SGCD | rs144249075 | chr5:155,135,063-156,194,798 | AX-122490735 |
| SGCD | rs144249075 | chr5:155,135,063-156,194,798 | AX-156284838 |
| SGCD | rs75722607  | chr5:155,135,063-156,194,798 | AX-35169607  |
| SGCD | rs970476    | chr5:155,135,063-156,194,798 | AX-11700926  |
| SGCD | rs75440809  | chr5:155,135,063-156,194,798 | AX-148860636 |
| SGCD | rs75440809  | chr5:155,135,063-156,194,798 | AX-156275634 |
| SGCD | rs970475    | chr5:155,135,063-156,194,798 | AX-35169611  |
| SGCD | rs72798952  | chr5:155,135,063-156,194,798 | AX-14943227  |
| SGCD | rs78159313  | chr5:155,135,063-156,194,798 | AX-156275635 |
| SGCD | rs78159313  | chr5:155,135,063-156,194,798 | AX-156292784 |
| SGCD | rs60618824  | chr5:155,135,063-156,194,798 | AX-35169613  |
| SGCD | rs1021903   | chr5:155,135,063-156,194,798 | AX-156275636 |
| SGCD | rs1021903   | chr5:155,135,063-156,194,798 | AX-156292785 |
| SGCD | rs1875963   | chr5:155,135,063-156,194,798 | AX-14943233  |
| SGCD | rs76717701  | chr5:155,135,063-156,194,798 | AX-14943234  |
| SGCD | rs1504927   | chr5:155,135,063-156,194,798 | AX-14943235  |
| SGCD | rs2055609   | chr5:155,135,063-156,194,798 | AX-12515648  |
| SGCD | rs34201599  | chr5:155,135,063-156,194,798 | AX-35169617  |
| SGCD | rs10062636  | chr5:155,135,063-156,194,798 | AX-41644535  |
| SGCD | rs3969758   | chr5:155,135,063-156,194,798 | AX-41644537  |
| SGCD | rs2312062   | chr5:155,135,063-156,194,798 | AX-35169625  |
| SGCD | rs2312063   | chr5:155,135,063-156,194,798 | AX-14943238  |
| SGCD | rs58394898  | chr5:155,135,063-156,194,798 | AX-14943239  |
| SGCD | rs80013625  | chr5:155,135,063-156,194,798 | AX-156275637 |
| SGCD | rs80013625  | chr5:155,135,063-156,194,798 | AX-156292786 |
| SGCD | rs77234766  | chr5:155,135,063-156,194,798 | AX-35169631  |
| SGCD | rs2312064   | chr5:155,135,063-156,194,798 | AX-14943243  |
| SGCD | rs1472756   | chr5:155,135,063-156,194,798 | AX-14943244  |
| SGCD | rs12521900  | chr5:155,135,063-156,194,798 | AX-41644539  |
| SGCD | rs12521918  | chr5:155,135,063-156,194,798 | AX-14943245  |
| SGCD | rs75672801  | chr5:155,135,063-156,194,798 | AX-14943246  |
| SGCD | rs11289380  | chr5:155,135,063-156,194,798 | AX-151256440 |
| SGCD | rs7737163   | chr5:155,135,063-156,194,798 | AX-35169633  |
| SGCD | rs7737609   | chr5:155,135,063-156,194,798 | AX-14943252  |
| SGCD | rs7715464   | chr5:155,135,063-156,194,798 | AX-14943253  |
| SGCD | rs10475702  | chr5:155,135,063-156,194,798 | AX-41644545  |
| SGCD | rs6880774   | chr5:155,135,063-156,194,798 | AX-12612972  |
| SGCD | rs17053509  | chr5:155,135,063-156,194,798 | AX-156275638 |
| SGCD | rs17053509  | chr5:155,135,063-156,194,798 | AX-156292787 |
| SGCD | rs2135026   | chr5:155,135,063-156,194,798 | AX-148301480 |
| SGCD | rs2135026   | chr5:155,135,063-156,194,798 | AX-156275639 |
| SGCD | rs2135027   | chr5:155,135,063-156,194,798 | AX-148446975 |
| SGCD | rs2135027   | chr5:155,135,063-156,194,798 | AX-156275640 |
| SGCD | rs59512108  | chr5:155,135,063-156,194,798 | AX-148746216 |
| SGCD | rs59512108  | chr5:155,135,063-156,194,798 | AX-156275641 |

|      |             |                              |              |
|------|-------------|------------------------------|--------------|
| SGCD | rs931798    | chr5:155,135,063-156,194,798 | AX-14943255  |
| SGCD | rs140617    | chr5:155,135,063-156,194,798 | AX-11260541  |
| SGCD | rs140616    | chr5:155,135,063-156,194,798 | AX-147938499 |
| SGCD | rs140615    | chr5:155,135,063-156,194,798 | AX-14943256  |
| SGCD | rs111699907 | chr5:155,135,063-156,194,798 | AX-119533275 |
| SGCD | rs1394603   | chr5:155,135,063-156,194,798 | AX-41644555  |
| SGCD | rs35129841  | chr5:155,135,063-156,194,798 | AX-41644557  |
| SGCD | rs6556570   | chr5:155,135,063-156,194,798 | AX-14943261  |
| SGCD | rs10476369  | chr5:155,135,063-156,194,798 | AX-41644561  |
| SGCD | rs1983099   | chr5:155,135,063-156,194,798 | AX-11357560  |
| SGCD | rs11960521  | chr5:155,135,063-156,194,798 | AX-41644563  |
| SGCD | rs7723660   | chr5:155,135,063-156,194,798 | AX-14943263  |
| SGCD | rs62380724  | chr5:155,135,063-156,194,798 | AX-14943264  |
| SGCD | rs924872    | chr5:155,135,063-156,194,798 | AX-14943265  |
| SGCD | rs4438860   | chr5:155,135,063-156,194,798 | AX-41644567  |
| SGCD | rs905789    | chr5:155,135,063-156,194,798 | AX-156275642 |
| SGCD | rs905789    | chr5:155,135,063-156,194,798 | AX-156292788 |
| SGCD | rs6556572   | chr5:155,135,063-156,194,798 | AX-35169643  |
| SGCD | rs73812224  | chr5:155,135,063-156,194,798 | AX-14943266  |
| SGCD | rs6556573   | chr5:155,135,063-156,194,798 | AX-14943267  |
| SGCD | rs6556574   | chr5:155,135,063-156,194,798 | AX-35169645  |
| SGCD | rs1553534   | chr5:155,135,063-156,194,798 | AX-11274825  |
| SGCD | rs9313905   | chr5:155,135,063-156,194,798 | AX-41644571  |
| SGCD | rs7708513   | chr5:155,135,063-156,194,798 | AX-14943271  |
| SGCD | rs1553535   | chr5:155,135,063-156,194,798 | AX-35169649  |
| SGCD | rs79005184  | chr5:155,135,063-156,194,798 | AX-14943272  |
| SGCD | rs62380725  | chr5:155,135,063-156,194,798 | AX-14943273  |
| SGCD | rs10476372  | chr5:155,135,063-156,194,798 | AX-41644573  |
| SGCD | rs77214147  | chr5:155,135,063-156,194,798 | AX-14943275  |
| SGCD | rs55669320  | chr5:155,135,063-156,194,798 | AX-50448389  |
| SGCD | rs4704798   | chr5:155,135,063-156,194,798 | AX-14943276  |
| SGCD | rs1059020   | chr5:155,135,063-156,194,798 | AX-35169651  |
| SGCD | rs77038602  | chr5:155,135,063-156,194,798 | AX-148884304 |
| SGCD | rs10476373  | chr5:155,135,063-156,194,798 | AX-147984250 |
| SGCD | rs10476373  | chr5:155,135,063-156,194,798 | AX-153799259 |
| SGCD | rs10476374  | chr5:155,135,063-156,194,798 | AX-156275643 |
| SGCD | rs79019903  | chr5:155,135,063-156,194,798 | AX-156275644 |
| SGCD | rs79019903  | chr5:155,135,063-156,194,798 | AX-156292789 |
| SGCD | rs77871929  | chr5:155,135,063-156,194,798 | AX-156275645 |
| SGCD | rs77871929  | chr5:155,135,063-156,194,798 | AX-156292790 |
| SGCD | rs6556578   | chr5:155,135,063-156,194,798 | AX-156275646 |
| SGCD | rs6556578   | chr5:155,135,063-156,194,798 | AX-156292791 |
| SGCD | rs73293248  | chr5:155,135,063-156,194,798 | AX-14943278  |
| SGCD | rs6884659   | chr5:155,135,063-156,194,798 | AX-148316911 |
| SGCD | rs6884659   | chr5:155,135,063-156,194,798 | AX-156275647 |
| SGCD | rs10780121  | chr5:155,135,063-156,194,798 | AX-156275648 |
| SGCD | rs62380727  | chr5:155,135,063-156,194,798 | AX-35169663  |
| SGCD | rs11743065  | chr5:155,135,063-156,194,798 | AX-14943279  |
| SGCD | rs6862189   | chr5:155,135,063-156,194,798 | AX-14943280  |
| SGCD | rs10036164  | chr5:155,135,063-156,194,798 | AX-156275650 |
| SGCD | rs10036164  | chr5:155,135,063-156,194,798 | AX-156292794 |
| SGCD | rs1472755   | chr5:155,135,063-156,194,798 | AX-156275651 |
| SGCD | rs1472755   | chr5:155,135,063-156,194,798 | AX-156292795 |
| SGCD | rs114027505 | chr5:155,135,063-156,194,798 | AX-148768610 |
| SGCD | rs114027505 | chr5:155,135,063-156,194,798 | AX-156268268 |



|      |             |                              |              |
|------|-------------|------------------------------|--------------|
| SGCD | rs4704799   | chr5:155,135,063-156,194,798 | AX-148031149 |
| SGCD | rs4704799   | chr5:155,135,063-156,194,798 | AX-156268269 |
| SGCD | rs17053531  | chr5:155,135,063-156,194,798 | AX-41644581  |
| SGCD | rs62380728  | chr5:155,135,063-156,194,798 | AX-35169679  |
| SGCD | rs62380729  | chr5:155,135,063-156,194,798 | AX-35169681  |
| SGCD | rs62380730  | chr5:155,135,063-156,194,798 | AX-35169683  |
| SGCD | rs10475703  | chr5:155,135,063-156,194,798 | AX-14943284  |
| SGCD | rs11960866  | chr5:155,135,063-156,194,798 | AX-41644583  |
| SGCD | rs75708568  | chr5:155,135,063-156,194,798 | AX-14943286  |
| SGCD | rs62380731  | chr5:155,135,063-156,194,798 | AX-14943288  |
| SGCD | rs4704800   | chr5:155,135,063-156,194,798 | AX-156288101 |
| SGCD | rs73812228  | chr5:155,135,063-156,194,798 | AX-14943291  |
| SGCD | rs6869537   | chr5:155,135,063-156,194,798 | AX-156282332 |
| SGCD | rs6869537   | chr5:155,135,063-156,194,798 | AX-156296979 |
| SGCD | rs28405992  | chr5:155,135,063-156,194,798 | AX-41644591  |
| SGCD | rs4705012   | chr5:155,135,063-156,194,798 | AX-12578514  |
| SGCD | rs4704801   | chr5:155,135,063-156,194,798 | AX-41644595  |
| SGCD | rs62380732  | chr5:155,135,063-156,194,798 | AX-14943295  |
| SGCD | rs55755417  | chr5:155,135,063-156,194,798 | AX-14943296  |
| SGCD | rs11743557  | chr5:155,135,063-156,194,798 | AX-11172119  |
| SGCD | rs4454042   | chr5:155,135,063-156,194,798 | AX-12572532  |
| SGCD | rs62380750  | chr5:155,135,063-156,194,798 | AX-14943299  |
| SGCD | rs10054859  | chr5:155,135,063-156,194,798 | AX-11089880  |
| SGCD | rs62380751  | chr5:155,135,063-156,194,798 | AX-156292797 |
| SGCD | rs9313909   | chr5:155,135,063-156,194,798 | AX-11680218  |
| SGCD | rs2135028   | chr5:155,135,063-156,194,798 | AX-12518368  |
| SGCD | rs73293268  | chr5:155,135,063-156,194,798 | AX-14943303  |
| SGCD | rs6865531   | chr5:155,135,063-156,194,798 | AX-14943304  |
| SGCD | rs62380752  | chr5:155,135,063-156,194,798 | AX-14943305  |
| SGCD | rs12716390  | chr5:155,135,063-156,194,798 | AX-12446247  |
| SGCD | rs62380753  | chr5:155,135,063-156,194,798 | AX-14943307  |
| SGCD | rs9313910   | chr5:155,135,063-156,194,798 | AX-14943308  |
| SGCD | rs10043022  | chr5:155,135,063-156,194,798 | AX-35169697  |
| SGCD | rs13185401  | chr5:155,135,063-156,194,798 | AX-156275654 |
| SGCD | rs62380754  | chr5:155,135,063-156,194,798 | AX-35169701  |
| SGCD | rs56709418  | chr5:155,135,063-156,194,798 | AX-14943311  |
| SGCD | rs62380756  | chr5:155,135,063-156,194,798 | AX-14943314  |
| SGCD | rs12054876  | chr5:155,135,063-156,194,798 | AX-14943318  |
| SGCD | rs2017982   | chr5:155,135,063-156,194,798 | AX-148373102 |
| SGCD | rs2017982   | chr5:155,135,063-156,194,798 | AX-156282333 |
| SGCD | rs10062440  | chr5:155,135,063-156,194,798 | AX-35169709  |
| SGCD | rs4705013   | chr5:155,135,063-156,194,798 | AX-11519470  |
| SGCD | rs6881353   | chr5:155,135,063-156,194,798 | AX-35169711  |
| SGCD | rs10515736  | chr5:155,135,063-156,194,798 | AX-35169715  |
| SGCD | rs79374679  | chr5:155,135,063-156,194,798 | AX-14943323  |
| SGCD | rs11296545  | chr5:155,135,063-156,194,798 | AX-11154850  |
| SGCD | rs7731517   | chr5:155,135,063-156,194,798 | AX-14943325  |
| SGCD | rs7731883   | chr5:155,135,063-156,194,798 | AX-11641737  |
| SGCD | rs113841326 | chr5:155,135,063-156,194,798 | AX-105145308 |
| SGCD | rs113841326 | chr5:155,135,063-156,194,798 | AX-92499059  |
| SGCD | rs1504928   | chr5:155,135,063-156,194,798 | AX-35169719  |
| SGCD | rs61422788  | chr5:155,135,063-156,194,798 | AX-14943328  |
| SGCD | rs6886901   | chr5:155,135,063-156,194,798 | AX-156275656 |
| SGCD | rs6886901   | chr5:155,135,063-156,194,798 | AX-156292798 |
| SGCD | rs76446055  | chr5:155,135,063-156,194,798 | AX-156275657 |

|      |             |                              |              |
|------|-------------|------------------------------|--------------|
| SGCD | rs76446055  | chr5:155,135,063-156,194,798 | AX-156292799 |
| SGCD | rs6879264   | chr5:155,135,063-156,194,798 | AX-156275658 |
| SGCD | rs6879264   | chr5:155,135,063-156,194,798 | AX-156292800 |
| SGCD | rs6879407   | chr5:155,135,063-156,194,798 | AX-12612930  |
| SGCD | rs9313916   | chr5:155,135,063-156,194,798 | AX-156268271 |
| SGCD | rs9313916   | chr5:155,135,063-156,194,798 | AX-156288102 |
| SGCD | rs1827687   | chr5:155,135,063-156,194,798 | AX-148290680 |
| SGCD | rs1827687   | chr5:155,135,063-156,194,798 | AX-156268272 |
| SGCD | rs2055610   | chr5:155,135,063-156,194,798 | AX-41644613  |
| SGCD | rs139072272 | chr5:155,135,063-156,194,798 | AX-113496746 |
| SGCD | ---         | chr5:155,135,063-156,194,798 | AX-151272390 |
| SGCD | ---         | chr5:155,135,063-156,194,798 | AX-151185966 |
| SGCD | rs2036557   | chr5:155,135,063-156,194,798 | AX-50448398  |
| SGCD | rs7710094   | chr5:155,135,063-156,194,798 | AX-86902545  |
| SGCD | rs56371636  | chr5:155,135,063-156,194,798 | AX-14943336  |
| SGCD | rs6556587   | chr5:155,135,063-156,194,798 | AX-156282334 |
| SGCD | rs6556587   | chr5:155,135,063-156,194,798 | AX-156296980 |
| SGCD | rs35414747  | chr5:155,135,063-156,194,798 | AX-156282335 |
| SGCD | rs35414747  | chr5:155,135,063-156,194,798 | AX-156296981 |
| SGCD | rs1910781   | chr5:155,135,063-156,194,798 | AX-148280325 |
| SGCD | rs1910781   | chr5:155,135,063-156,194,798 | AX-148354556 |
| SGCD | rs7727771   | chr5:155,135,063-156,194,798 | AX-147980675 |
| SGCD | rs7727771   | chr5:155,135,063-156,194,798 | AX-153796096 |
| SGCD | rs6872627   | chr5:155,135,063-156,194,798 | AX-35169737  |
| SGCD | rs6896669   | chr5:155,135,063-156,194,798 | AX-14943341  |
| SGCD | rs10042626  | chr5:155,135,063-156,194,798 | AX-148010404 |
| SGCD | rs7729019   | chr5:155,135,063-156,194,798 | AX-41644621  |
| SGCD | rs57792332  | chr5:155,135,063-156,194,798 | AX-14943343  |
| SGCD | rs57620638  | chr5:155,135,063-156,194,798 | AX-14943344  |
| SGCD | rs56347407  | chr5:155,135,063-156,194,798 | AX-14943346  |
| SGCD | rs75451933  | chr5:155,135,063-156,194,798 | AX-14943347  |
| SGCD | rs6894759   | chr5:155,135,063-156,194,798 | AX-14943348  |
| SGCD | rs73812240  | chr5:155,135,063-156,194,798 | AX-35169745  |
| SGCD | rs6556594   | chr5:155,135,063-156,194,798 | AX-14943350  |
| SGCD | rs7718903   | chr5:155,135,063-156,194,798 | AX-14943352  |
| SGCD | rs56132359  | chr5:155,135,063-156,194,798 | AX-156282336 |
| SGCD | rs56132359  | chr5:155,135,063-156,194,798 | AX-156296982 |
| SGCD | rs2174417   | chr5:155,135,063-156,194,798 | AX-14943355  |
| SGCD | rs12163943  | chr5:155,135,063-156,194,798 | AX-35169751  |
| SGCD | rs7729818   | chr5:155,135,063-156,194,798 | AX-41644627  |
| SGCD | rs10476390  | chr5:155,135,063-156,194,798 | AX-14943358  |
| SGCD | rs68077272  | chr5:155,135,063-156,194,798 | AX-151169942 |
| SGCD | rs68077272  | chr5:155,135,063-156,194,798 | AX-156285730 |
| SGCD | rs185598356 | chr5:155,135,063-156,194,798 | AX-151323255 |
| SGCD | rs185598356 | chr5:155,135,063-156,194,798 | AX-156284097 |
| SGCD | rs181901232 | chr5:155,135,063-156,194,798 | AX-151344771 |
| SGCD | rs181901232 | chr5:155,135,063-156,194,798 | AX-156284098 |
| SGCD | rs200906259 | chr5:155,135,063-156,194,798 | AX-156284994 |
| SGCD | rs186925058 | chr5:155,135,063-156,194,798 | AX-151316880 |
| SGCD | rs186925058 | chr5:155,135,063-156,194,798 | AX-156284099 |
| SGCD | rs13357986  | chr5:155,135,063-156,194,798 | AX-151272485 |
| SGCD | rs13357986  | chr5:155,135,063-156,194,798 | AX-156284100 |
| SGCD | rs12163970  | chr5:155,135,063-156,194,798 | AX-119976927 |
| SGCD | rs11135199  | chr5:155,135,063-156,194,798 | AX-156284101 |
| SGCD | rs7448162   | chr5:155,135,063-156,194,798 | AX-120253339 |

|      |             |                              |              |
|------|-------------|------------------------------|--------------|
| SGCD | rs7448162   | chr5:155,135,063-156,194,798 | AX-151115759 |
| SGCD | ---         | chr5:155,135,063-156,194,798 | AX-156288103 |
| SGCD | rs4502803   | chr5:155,135,063-156,194,798 | AX-14943359  |
| SGCD | rs11135200  | chr5:155,135,063-156,194,798 | AX-156268274 |
| SGCD | rs11135200  | chr5:155,135,063-156,194,798 | AX-156288104 |
| SGCD | rs11135202  | chr5:155,135,063-156,194,798 | AX-14943360  |
| SGCD | rs1504929   | chr5:155,135,063-156,194,798 | AX-12466787  |
| SGCD | rs1504930   | chr5:155,135,063-156,194,798 | AX-120356631 |
| SGCD | rs1504930   | chr5:155,135,063-156,194,798 | AX-156288105 |
| SGCD | rs4705014   | chr5:155,135,063-156,194,798 | AX-14943364  |
| SGCD | rs6556603   | chr5:155,135,063-156,194,798 | AX-156268275 |
| SGCD | rs6556603   | chr5:155,135,063-156,194,798 | AX-156288106 |
| SGCD | rs1604957   | chr5:155,135,063-156,194,798 | AX-156288107 |
| SGCD | rs79374913  | chr5:155,135,063-156,194,798 | AX-14943367  |
| SGCD | rs10063250  | chr5:155,135,063-156,194,798 | AX-11090381  |
| SGCD | rs10038124  | chr5:155,135,063-156,194,798 | AX-148274620 |
| SGCD | rs10038124  | chr5:155,135,063-156,194,798 | AX-156268277 |
| SGCD | rs57757758  | chr5:155,135,063-156,194,798 | AX-151215741 |
| SGCD | rs57757758  | chr5:155,135,063-156,194,798 | AX-156268278 |
| SGCD | rs112828647 | chr5:155,135,063-156,194,798 | AX-14943369  |
| SGCD | rs1604958   | chr5:155,135,063-156,194,798 | AX-156268279 |
| SGCD | rs1604958   | chr5:155,135,063-156,194,798 | AX-156288108 |
| SGCD | rs78674996  | chr5:155,135,063-156,194,798 | AX-14943370  |
| SGCD | rs2135029   | chr5:155,135,063-156,194,798 | AX-11369551  |
| SGCD | rs6556609   | chr5:155,135,063-156,194,798 | AX-14943372  |
| SGCD | rs6556610   | chr5:155,135,063-156,194,798 | AX-156282337 |
| SGCD | rs6556612   | chr5:155,135,063-156,194,798 | AX-156268281 |
| SGCD | rs78269284  | chr5:155,135,063-156,194,798 | AX-14943375  |
| SGCD | rs1587857   | chr5:155,135,063-156,194,798 | AX-156288111 |
| SGCD | rs867009    | chr5:155,135,063-156,194,798 | AX-35169779  |
| SGCD | rs116064669 | chr5:155,135,063-156,194,798 | AX-148762330 |
| SGCD | rs116064669 | chr5:155,135,063-156,194,798 | AX-156268283 |
| SGCD | rs6556615   | chr5:155,135,063-156,194,798 | AX-11571769  |
| SGCD | rs62382689  | chr5:155,135,063-156,194,798 | AX-14943383  |
| SGCD | ---         | chr5:155,135,063-156,194,798 | AX-38254299  |
| SGCD | rs905788    | chr5:155,135,063-156,194,798 | AX-147865460 |
| SGCD | rs905788    | chr5:155,135,063-156,194,798 | AX-147961257 |
| SGCD | rs144172041 | chr5:155,135,063-156,194,798 | AX-14943387  |
| SGCD | rs144172041 | chr5:155,135,063-156,194,798 | AX-156297841 |
| SGCD | rs6881542   | chr5:155,135,063-156,194,798 | AX-14943389  |
| SGCD | rs2055611   | chr5:155,135,063-156,194,798 | AX-14943390  |
| SGCD | rs1504931   | chr5:155,135,063-156,194,798 | AX-11269874  |
| SGCD | rs2055612   | chr5:155,135,063-156,194,798 | AX-14943391  |
| SGCD | rs74986115  | chr5:155,135,063-156,194,798 | AX-14943392  |
| SGCD | rs17053557  | chr5:155,135,063-156,194,798 | AX-12487900  |
| SGCD | rs6880816   | chr5:155,135,063-156,194,798 | AX-12612974  |
| SGCD | rs13189810  | chr5:155,135,063-156,194,798 | AX-35169791  |
| SGCD | rs7737328   | chr5:155,135,063-156,194,798 | AX-12638723  |
| SGCD | rs6556623   | chr5:155,135,063-156,194,798 | AX-14943398  |
| SGCD | rs6556624   | chr5:155,135,063-156,194,798 | AX-14943400  |
| SGCD | rs6556625   | chr5:155,135,063-156,194,798 | AX-11571771  |
| SGCD | rs4705015   | chr5:155,135,063-156,194,798 | AX-35169795  |
| SGCD | rs4705017   | chr5:155,135,063-156,194,798 | AX-14943403  |
| SGCD | rs2312182   | chr5:155,135,063-156,194,798 | AX-12525661  |
| SGCD | rs75105227  | chr5:155,135,063-156,194,798 | AX-38254305  |

|      |             |                              |              |
|------|-------------|------------------------------|--------------|
| SGCD | rs10054228  | chr5:155,135,063-156,194,798 | AX-92722698  |
| SGCD | rs1504933   | chr5:155,135,063-156,194,798 | AX-12466788  |
| SGCD | rs75493479  | chr5:155,135,063-156,194,798 | AX-14943417  |
| SGCD | rs1504934   | chr5:155,135,063-156,194,798 | AX-41644657  |
| SGCD | rs1504935   | chr5:155,135,063-156,194,798 | AX-12466789  |
| SGCD | rs10078675  | chr5:155,135,063-156,194,798 | AX-35169815  |
| SGCD | rs62382691  | chr5:155,135,063-156,194,798 | AX-14943433  |
| SGCD | rs6863243   | chr5:155,135,063-156,194,798 | AX-14943434  |
| SGCD | rs6883722   | chr5:155,135,063-156,194,798 | AX-11591958  |
| SGCD | rs12652669  | chr5:155,135,063-156,194,798 | AX-11220942  |
| SGCD | rs62382692  | chr5:155,135,063-156,194,798 | AX-14943437  |
| SGCD | rs12659033  | chr5:155,135,063-156,194,798 | AX-35169817  |
| SGCD | rs10052627  | chr5:155,135,063-156,194,798 | AX-148833852 |
| SGCD | rs10052627  | chr5:155,135,063-156,194,798 | AX-156275660 |
| SGCD | rs7718439   | chr5:155,135,063-156,194,798 | AX-148492936 |
| SGCD | rs17053564  | chr5:155,135,063-156,194,798 | AX-156275661 |
| SGCD | rs17053564  | chr5:155,135,063-156,194,798 | AX-156292803 |
| SGCD | rs74843411  | chr5:155,135,063-156,194,798 | AX-113251381 |
| SGCD | rs74843411  | chr5:155,135,063-156,194,798 | AX-156275662 |
| SGCD | rs57683078  | chr5:155,135,063-156,194,798 | AX-14943443  |
| SGCD | rs17052633  | chr5:155,135,063-156,194,798 | AX-11301450  |
| SGCD | rs62382694  | chr5:155,135,063-156,194,798 | AX-14943446  |
| SGCD | rs140625177 | chr5:155,135,063-156,194,798 | AX-14943447  |
| SGCD | rs140625177 | chr5:155,135,063-156,194,798 | AX-156284476 |
| SGCD | rs62382695  | chr5:155,135,063-156,194,798 | AX-14943453  |
| SGCD | rs10476415  | chr5:155,135,063-156,194,798 | AX-41644673  |
| SGCD | rs11135226  | chr5:155,135,063-156,194,798 | AX-11146232  |
| SGCD | rs13162852  | chr5:155,135,063-156,194,798 | AX-35169829  |
| SGCD | rs77020940  | chr5:155,135,063-156,194,798 | AX-14943466  |
| SGCD | rs117639292 | chr5:155,135,063-156,194,798 | AX-14943467  |
| SGCD | rs983467    | chr5:155,135,063-156,194,798 | AX-11705004  |
| SGCD | rs77238449  | chr5:155,135,063-156,194,798 | AX-14943471  |
| SGCD | rs149406899 | chr5:155,135,063-156,194,798 | AX-122389193 |
| SGCD | rs149406899 | chr5:155,135,063-156,194,798 | AX-156297714 |
| SGCD | rs7722422   | chr5:155,135,063-156,194,798 | AX-148762253 |
| SGCD | rs7722422   | chr5:155,135,063-156,194,798 | AX-156275663 |
| SGCD | rs7717944   | chr5:155,135,063-156,194,798 | AX-122901097 |
| SGCD | rs7717944   | chr5:155,135,063-156,194,798 | AX-148055056 |
| SGCD | ---         | chr5:155,135,063-156,194,798 | AX-148014241 |
| SGCD | ---         | chr5:155,135,063-156,194,798 | AX-153825523 |
| SGCD | rs113636560 | chr5:155,135,063-156,194,798 | AX-156275664 |
| SGCD | rs17053572  | chr5:155,135,063-156,194,798 | AX-14943487  |
| SGCD | rs7719992   | chr5:155,135,063-156,194,798 | AX-151145850 |
| SGCD | rs112190759 | chr5:155,135,063-156,194,798 | AX-148734655 |
| SGCD | rs112190759 | chr5:155,135,063-156,194,798 | AX-156275666 |
| SGCD | rs9313941   | chr5:155,135,063-156,194,798 | AX-11680219  |
| SGCD | rs7720922   | chr5:155,135,063-156,194,798 | AX-156275667 |
| SGCD | rs7720922   | chr5:155,135,063-156,194,798 | AX-156292804 |
| SGCD | rs7721082   | chr5:155,135,063-156,194,798 | AX-41644683  |
| SGCD | rs55820495  | chr5:155,135,063-156,194,798 | AX-147982496 |
| SGCD | rs55820495  | chr5:155,135,063-156,194,798 | AX-153797688 |
| SGCD | rs1504936   | chr5:155,135,063-156,194,798 | AX-41644687  |
| SGCD | rs2312183   | chr5:155,135,063-156,194,798 | AX-14943503  |
| SGCD | rs2135030   | chr5:155,135,063-156,194,798 | AX-14943504  |
| SGCD | rs55872084  | chr5:155,135,063-156,194,798 | AX-14943505  |

|      |             |                              |              |
|------|-------------|------------------------------|--------------|
| SGCD | rs73295175  | chr5:155,135,063-156,194,798 | AX-14943506  |
| SGCD | rs4704803   | chr5:155,135,063-156,194,798 | AX-41644691  |
| SGCD | rs1354563   | chr5:155,135,063-156,194,798 | AX-156275668 |
| SGCD | rs1354563   | chr5:155,135,063-156,194,798 | AX-156292805 |
| SGCD | rs1354564   | chr5:155,135,063-156,194,798 | AX-41644695  |
| SGCD | rs111703649 | chr5:155,135,063-156,194,798 | AX-148850809 |
| SGCD | rs111703649 | chr5:155,135,063-156,194,798 | AX-156284102 |
| SGCD | rs2135031   | chr5:155,135,063-156,194,798 | AX-151131603 |
| SGCD | rs2135031   | chr5:155,135,063-156,194,798 | AX-156284103 |
| SGCD | rs13359664  | chr5:155,135,063-156,194,798 | AX-151421355 |
| SGCD | rs13359664  | chr5:155,135,063-156,194,798 | AX-156284104 |
| SGCD | rs4704804   | chr5:155,135,063-156,194,798 | AX-12578506  |
| SGCD | rs980149    | chr5:155,135,063-156,194,798 | AX-11702882  |
| SGCD | rs980148    | chr5:155,135,063-156,194,798 | AX-14943522  |
| SGCD | rs17638584  | chr5:155,135,063-156,194,798 | AX-11332542  |
| SGCD | rs115180142 | chr5:155,135,063-156,194,798 | AX-14943527  |
| SGCD | rs11304197  | chr5:155,135,063-156,194,798 | AX-107817695 |
| SGCD | rs11304197  | chr5:155,135,063-156,194,798 | AX-156275669 |
| SGCD | rs2055613   | chr5:155,135,063-156,194,798 | AX-11363729  |
| SGCD | rs2312184   | chr5:155,135,063-156,194,798 | AX-148165173 |
| SGCD | rs2312184   | chr5:155,135,063-156,194,798 | AX-156275670 |
| SGCD | rs61068059  | chr5:155,135,063-156,194,798 | AX-156284105 |
| SGCD | rs61068059  | chr5:155,135,063-156,194,798 | AX-86896730  |
| SGCD | rs2174419   | chr5:155,135,063-156,194,798 | AX-156292806 |
| SGCD | rs4705018   | chr5:155,135,063-156,194,798 | AX-11519471  |
| SGCD | rs4307078   | chr5:155,135,063-156,194,798 | AX-11500512  |
| SGCD | rs11949028  | chr5:155,135,063-156,194,798 | AX-151230678 |
| SGCD | rs10866739  | chr5:155,135,063-156,194,798 | AX-35169889  |
| SGCD | rs34285044  | chr5:155,135,063-156,194,798 | AX-151290200 |
| SGCD | rs34285044  | chr5:155,135,063-156,194,798 | AX-156286007 |
| SGCD | rs256846    | chr5:155,135,063-156,194,798 | AX-14943540  |
| SGCD | rs256845    | chr5:155,135,063-156,194,798 | AX-156275672 |
| SGCD | rs7720984   | chr5:155,135,063-156,194,798 | AX-11641068  |
| SGCD | rs256844    | chr5:155,135,063-156,194,798 | AX-14943549  |
| SGCD | rs256843    | chr5:155,135,063-156,194,798 | AX-14943550  |
| SGCD | rs1368300   | chr5:155,135,063-156,194,798 | AX-14943552  |
| SGCD | rs256842    | chr5:155,135,063-156,194,798 | AX-11398876  |
| SGCD | rs256841    | chr5:155,135,063-156,194,798 | AX-11398874  |
| SGCD | rs6886828   | chr5:155,135,063-156,194,798 | AX-11592156  |
| SGCD | rs256840    | chr5:155,135,063-156,194,798 | AX-14943555  |
| SGCD | ---         | chr5:155,135,063-156,194,798 | AX-151251691 |
| SGCD | ---         | chr5:155,135,063-156,194,798 | AX-156275673 |
| SGCD | rs11738716  | chr5:155,135,063-156,194,798 | AX-14943560  |
| SGCD | rs116566991 | chr5:155,135,063-156,194,798 | AX-14943561  |
| SGCD | rs34567151  | chr5:155,135,063-156,194,798 | AX-120577939 |
| SGCD | rs34567151  | chr5:155,135,063-156,194,798 | AX-156284212 |
| SGCD | rs256821    | chr5:155,135,063-156,194,798 | AX-12532129  |
| SGCD | rs256820    | chr5:155,135,063-156,194,798 | AX-156282339 |
| SGCD | rs256820    | chr5:155,135,063-156,194,798 | AX-156296983 |
| SGCD | rs6880345   | chr5:155,135,063-156,194,798 | AX-156282340 |
| SGCD | rs6880345   | chr5:155,135,063-156,194,798 | AX-156296984 |
| SGCD | rs256819    | chr5:155,135,063-156,194,798 | AX-156275674 |
| SGCD | rs256819    | chr5:155,135,063-156,194,798 | AX-156292808 |
| SGCD | rs73297105  | chr5:155,135,063-156,194,798 | AX-14943578  |
| SGCD | rs4588577   | chr5:155,135,063-156,194,798 | AX-156292809 |

|      |             |                              |              |
|------|-------------|------------------------------|--------------|
| SGCD | rs4613690   | chr5:155,135,063-156,194,798 | AX-156275676 |
| SGCD | rs4613690   | chr5:155,135,063-156,194,798 | AX-156292810 |
| SGCD | rs1835912   | chr5:155,135,063-156,194,798 | AX-156275678 |
| SGCD | rs1835912   | chr5:155,135,063-156,194,798 | AX-156292812 |
| SGCD | rs9313957   | chr5:155,135,063-156,194,798 | AX-41644723  |
| SGCD | rs256822    | chr5:155,135,063-156,194,798 | AX-147799063 |
| SGCD | rs256822    | chr5:155,135,063-156,194,798 | AX-147892957 |
| SGCD | rs256823    | chr5:155,135,063-156,194,798 | AX-14943582  |
| SGCD | rs78854340  | chr5:155,135,063-156,194,798 | AX-35169911  |
| SGCD | rs256824    | chr5:155,135,063-156,194,798 | AX-14943587  |
| SGCD | rs256825    | chr5:155,135,063-156,194,798 | AX-14943592  |
| SGCD | ---         | chr5:155,135,063-156,194,798 | AX-86664935  |
| SGCD | rs74846539  | chr5:155,135,063-156,194,798 | AX-83465691  |
| SGCD | rs45559835  | chr5:155,135,063-156,194,798 | AX-11510984  |
| SGCD | rs256826    | chr5:155,135,063-156,194,798 | AX-12532131  |
| SGCD | rs934417    | chr5:155,135,063-156,194,798 | AX-12657259  |
| SGCD | rs13360574  | chr5:155,135,063-156,194,798 | AX-11251212  |
| SGCD | rs78118273  | chr5:155,135,063-156,194,798 | AX-35169917  |
| SGCD | rs256839    | chr5:155,135,063-156,194,798 | AX-14943603  |
| SGCD | rs183745    | chr5:155,135,063-156,194,798 | AX-11346362  |
| SGCD | rs1368299   | chr5:155,135,063-156,194,798 | AX-12460032  |
| SGCD | rs256838    | chr5:155,135,063-156,194,798 | AX-156275679 |
| SGCD | rs256838    | chr5:155,135,063-156,194,798 | AX-156292813 |
| SGCD | rs891907    | chr5:155,135,063-156,194,798 | AX-14943612  |
| SGCD | rs891906    | chr5:155,135,063-156,194,798 | AX-12653932  |
| SGCD | rs6883496   | chr5:155,135,063-156,194,798 | AX-14943614  |
| SGCD | rs256837    | chr5:155,135,063-156,194,798 | AX-113251383 |
| SGCD | rs256837    | chr5:155,135,063-156,194,798 | AX-156292814 |
| SGCD | rs17639279  | chr5:155,135,063-156,194,798 | AX-156275680 |
| SGCD | rs17639279  | chr5:155,135,063-156,194,798 | AX-156292815 |
| SGCD | rs73812681  | chr5:155,135,063-156,194,798 | AX-14943615  |
| SGCD | rs256836    | chr5:155,135,063-156,194,798 | AX-11398870  |
| SGCD | rs73297112  | chr5:155,135,063-156,194,798 | AX-14943618  |
| SGCD | rs77542985  | chr5:155,135,063-156,194,798 | AX-156292816 |
| SGCD | rs256835    | chr5:155,135,063-156,194,798 | AX-14943621  |
| SGCD | rs111375704 | chr5:155,135,063-156,194,798 | AX-151217032 |
| SGCD | rs256834    | chr5:155,135,063-156,194,798 | AX-35169935  |
| SGCD | rs256833    | chr5:155,135,063-156,194,798 | AX-151323233 |
| SGCD | rs256833    | chr5:155,135,063-156,194,798 | AX-156275682 |
| SGCD | rs256832    | chr5:155,135,063-156,194,798 | AX-147993448 |
| SGCD | rs256832    | chr5:155,135,063-156,194,798 | AX-153807283 |
| SGCD | rs256831    | chr5:155,135,063-156,194,798 | AX-148568986 |
| SGCD | rs256831    | chr5:155,135,063-156,194,798 | AX-156268284 |
| SGCD | rs56235470  | chr5:155,135,063-156,194,798 | AX-148369863 |
| SGCD | rs56235470  | chr5:155,135,063-156,194,798 | AX-156284106 |
| SGCD | rs256830    | chr5:155,135,063-156,194,798 | AX-156268285 |
| SGCD | rs256830    | chr5:155,135,063-156,194,798 | AX-156288112 |
| SGCD | rs256829    | chr5:155,135,063-156,194,798 | AX-113734795 |
| SGCD | rs112504711 | chr5:155,135,063-156,194,798 | AX-156285736 |
| SGCD | rs256828    | chr5:155,135,063-156,194,798 | AX-153810205 |
| SGCD | rs256828    | chr5:155,135,063-156,194,798 | AX-92467994  |
| SGCD | rs256827    | chr5:155,135,063-156,194,798 | AX-156282341 |
| SGCD | rs256827    | chr5:155,135,063-156,194,798 | AX-156296986 |
| SGCD | rs113601248 | chr5:155,135,063-156,194,798 | AX-121773452 |
| SGCD | rs113601248 | chr5:155,135,063-156,194,798 | AX-148551837 |

|      |             |                              |              |
|------|-------------|------------------------------|--------------|
| SGCD | rs115321168 | chr5:155,135,063-156,194,798 | AX-35169951  |
| SGCD | rs139085097 | chr5:155,135,063-156,194,798 | AX-148823277 |
| SGCD | rs139085097 | chr5:155,135,063-156,194,798 | AX-156284107 |
| SGCD | rs4639205   | chr5:155,135,063-156,194,798 | AX-156282343 |
| SGCD | rs4639205   | chr5:155,135,063-156,194,798 | AX-156296987 |
| SGCD | rs115672382 | chr5:155,135,063-156,194,798 | AX-156282344 |
| SGCD | rs7700916   | chr5:155,135,063-156,194,798 | AX-148384501 |
| SGCD | rs7700916   | chr5:155,135,063-156,194,798 | AX-156282345 |
| SGCD | rs7715748   | chr5:155,135,063-156,194,798 | AX-123016163 |
| SGCD | rs7715748   | chr5:155,135,063-156,194,798 | AX-156282346 |
| SGCD | rs7701076   | chr5:155,135,063-156,194,798 | AX-156282347 |
| SGCD | ---         | chr5:155,135,063-156,194,798 | AX-151421704 |
| SGCD | ---         | chr5:155,135,063-156,194,798 | AX-156284108 |
| SGCD | rs4447971   | chr5:155,135,063-156,194,798 | AX-148299096 |
| SGCD | rs4447971   | chr5:155,135,063-156,194,798 | AX-156282348 |
| SGCD | rs2656894   | chr5:155,135,063-156,194,798 | AX-14943626  |
| SGCD | rs75352978  | chr5:155,135,063-156,194,798 | AX-14943628  |
| SGCD | rs6889462   | chr5:155,135,063-156,194,798 | AX-35169957  |
| SGCD | rs78667023  | chr5:155,135,063-156,194,798 | AX-14943631  |
| SGCD | rs79835445  | chr5:155,135,063-156,194,798 | AX-14943632  |
| SGCD | rs6869314   | chr5:155,135,063-156,194,798 | AX-41644749  |
| SGCD | rs72801133  | chr5:155,135,063-156,194,798 | AX-14943633  |
| SGCD | rs80019372  | chr5:155,135,063-156,194,798 | AX-14943634  |
| SGCD | rs1432681   | chr5:155,135,063-156,194,798 | AX-156275684 |
| SGCD | rs1432681   | chr5:155,135,063-156,194,798 | AX-156292818 |
| SGCD | rs57640108  | chr5:155,135,063-156,194,798 | AX-148799293 |
| SGCD | rs57640108  | chr5:155,135,063-156,194,798 | AX-156275685 |
| SGCD | rs2656895   | chr5:155,135,063-156,194,798 | AX-148069527 |
| SGCD | rs2656895   | chr5:155,135,063-156,194,798 | AX-156275686 |
| SGCD | rs7715938   | chr5:155,135,063-156,194,798 | AX-156275687 |
| SGCD | rs7715938   | chr5:155,135,063-156,194,798 | AX-156292819 |
| SGCD | rs73297120  | chr5:155,135,063-156,194,798 | AX-156275688 |
| SGCD | rs73297120  | chr5:155,135,063-156,194,798 | AX-156292820 |
| SGCD | rs4705019   | chr5:155,135,063-156,194,798 | AX-14943640  |
| SGCD | rs6897602   | chr5:155,135,063-156,194,798 | AX-12613560  |
| SGCD | rs2082388   | chr5:155,135,063-156,194,798 | AX-14943642  |
| SGCD | rs17053596  | chr5:155,135,063-156,194,798 | AX-11301527  |
| SGCD | rs77627069  | chr5:155,135,063-156,194,798 | AX-14943646  |
| SGCD | rs10463128  | chr5:155,135,063-156,194,798 | AX-14943647  |
| SGCD | rs6893816   | chr5:155,135,063-156,194,798 | AX-120669944 |
| SGCD | rs6893816   | chr5:155,135,063-156,194,798 | AX-156275690 |
| SGCD | rs144320058 | chr5:155,135,063-156,194,798 | AX-148855843 |
| SGCD | rs144320058 | chr5:155,135,063-156,194,798 | AX-96733820  |
| SGCD | rs115307128 | chr5:155,135,063-156,194,798 | AX-14943649  |
| SGCD | rs12517498  | chr5:155,135,063-156,194,798 | AX-14943650  |
| SGCD | rs7715923   | chr5:155,135,063-156,194,798 | AX-14943653  |
| SGCD | rs60128166  | chr5:155,135,063-156,194,798 | AX-120580236 |
| SGCD | rs60128166  | chr5:155,135,063-156,194,798 | AX-122466600 |
| SGCD | rs11951311  | chr5:155,135,063-156,194,798 | AX-120074000 |
| SGCD | rs11951311  | chr5:155,135,063-156,194,798 | AX-148713421 |
| SGCD | rs56183897  | chr5:155,135,063-156,194,798 | AX-14943654  |
| SGCD | rs17558929  | chr5:155,135,063-156,194,798 | AX-41644753  |
| SGCD | rs194145    | chr5:155,135,063-156,194,798 | AX-35169973  |
| SGCD | rs6897183   | chr5:155,135,063-156,194,798 | AX-156275691 |
| SGCD | rs6897183   | chr5:155,135,063-156,194,798 | AX-156292822 |

|      |             |                              |              |
|------|-------------|------------------------------|--------------|
| SGCD | rs145342273 | chr5:155,135,063-156,194,798 | AX-122424428 |
| SGCD | rs145342273 | chr5:155,135,063-156,194,798 | AX-156298384 |
| SGCD | rs75152502  | chr5:155,135,063-156,194,798 | AX-156282349 |
| SGCD | rs75152502  | chr5:155,135,063-156,194,798 | AX-156296989 |
| SGCD | rs113985602 | chr5:155,135,063-156,194,798 | AX-147993020 |
| SGCD | rs113985602 | chr5:155,135,063-156,194,798 | AX-92477667  |
| SGCD | rs253604    | chr5:155,135,063-156,194,798 | AX-14943658  |
| SGCD | rs12517691  | chr5:155,135,063-156,194,798 | AX-14943659  |
| SGCD | rs72801137  | chr5:155,135,063-156,194,798 | AX-14943661  |
| SGCD | rs73297132  | chr5:155,135,063-156,194,798 | AX-14943662  |
| SGCD | rs2431771   | chr5:155,135,063-156,194,798 | AX-14943663  |
| SGCD | rs1432682   | chr5:155,135,063-156,194,798 | AX-35169977  |
| SGCD | rs112947957 | chr5:155,135,063-156,194,798 | AX-107754603 |
| SGCD | rs112947957 | chr5:155,135,063-156,194,798 | AX-156298423 |
| SGCD | rs200501640 | chr5:155,135,063-156,194,798 | AX-156286317 |
| SGCD | rs2431770   | chr5:155,135,063-156,194,798 | AX-14943665  |
| SGCD | rs77385690  | chr5:155,135,063-156,194,798 | AX-14943669  |
| SGCD | rs73297136  | chr5:155,135,063-156,194,798 | AX-14943671  |
| SGCD | rs6897279   | chr5:155,135,063-156,194,798 | AX-14943672  |
| SGCD | rs10515740  | chr5:155,135,063-156,194,798 | AX-14943674  |
| SGCD | rs73297140  | chr5:155,135,063-156,194,798 | AX-14943675  |
| SGCD | rs9313970   | chr5:155,135,063-156,194,798 | AX-41644759  |
| SGCD | rs17639646  | chr5:155,135,063-156,194,798 | AX-156275692 |
| SGCD | rs17639646  | chr5:155,135,063-156,194,798 | AX-156292823 |
| SGCD | rs11955038  | chr5:155,135,063-156,194,798 | AX-41644763  |
| SGCD | rs147260561 | chr5:155,135,063-156,194,798 | AX-151416534 |
| SGCD | rs147260561 | chr5:155,135,063-156,194,798 | AX-156298488 |
| SGCD | rs11746739  | chr5:155,135,063-156,194,798 | AX-41644765  |
| SGCD | rs253603    | chr5:155,135,063-156,194,798 | AX-14943681  |
| SGCD | rs73297148  | chr5:155,135,063-156,194,798 | AX-14943682  |
| SGCD | rs34263435  | chr5:155,135,063-156,194,798 | AX-120998769 |
| SGCD | rs194144    | chr5:155,135,063-156,194,798 | AX-14943684  |
| SGCD | rs11743093  | chr5:155,135,063-156,194,798 | AX-156275693 |
| SGCD | rs11743093  | chr5:155,135,063-156,194,798 | AX-156292824 |
| SGCD | rs12521822  | chr5:155,135,063-156,194,798 | AX-35169993  |
| SGCD | rs253602    | chr5:155,135,063-156,194,798 | AX-12531518  |
| SGCD | rs113494196 | chr5:155,135,063-156,194,798 | AX-151412317 |
| SGCD | rs113494196 | chr5:155,135,063-156,194,798 | AX-156275694 |
| SGCD | rs253601    | chr5:155,135,063-156,194,798 | AX-148620405 |
| SGCD | rs253601    | chr5:155,135,063-156,194,798 | AX-156275695 |
| SGCD | rs253600    | chr5:155,135,063-156,194,798 | AX-147999423 |
| SGCD | rs253600    | chr5:155,135,063-156,194,798 | AX-153812552 |
| SGCD | rs6877566   | chr5:155,135,063-156,194,798 | AX-35169995  |
| SGCD | rs6885454   | chr5:155,135,063-156,194,798 | AX-11592071  |
| SGCD | rs79127894  | chr5:155,135,063-156,194,798 | AX-35169997  |
| SGCD | rs253599    | chr5:155,135,063-156,194,798 | AX-156292825 |
| SGCD | rs1432683   | chr5:155,135,063-156,194,798 | AX-14943692  |
| SGCD | rs17053604  | chr5:155,135,063-156,194,798 | AX-41644767  |
| SGCD | rs2216656   | chr5:155,135,063-156,194,798 | AX-12521393  |
| SGCD | rs17639859  | chr5:155,135,063-156,194,798 | AX-14943695  |
| SGCD | rs253598    | chr5:155,135,063-156,194,798 | AX-41644771  |
| SGCD | rs77362812  | chr5:155,135,063-156,194,798 | AX-14943696  |
| SGCD | rs4337839   | chr5:155,135,063-156,194,798 | AX-11501712  |
| SGCD | rs6861920   | chr5:155,135,063-156,194,798 | AX-41644777  |
| SGCD | rs11750620  | chr5:155,135,063-156,194,798 | AX-12418487  |



|      |             |                              |              |
|------|-------------|------------------------------|--------------|
| SGCD | rs35783917  | chr5:155,135,063-156,194,798 | AX-120374372 |
| SGCD | rs253596    | chr5:155,135,063-156,194,798 | AX-14943700  |
| SGCD | rs253595    | chr5:155,135,063-156,194,798 | AX-41644779  |
| SGCD | rs253594    | chr5:155,135,063-156,194,798 | AX-11397401  |
| SGCD | rs253593    | chr5:155,135,063-156,194,798 | AX-14943702  |
| SGCD | rs17053613  | chr5:155,135,063-156,194,798 | AX-12487907  |
| SGCD | rs10071452  | chr5:155,135,063-156,194,798 | AX-14943706  |
| SGCD | rs10076239  | chr5:155,135,063-156,194,798 | AX-156275697 |
| SGCD | rs10076239  | chr5:155,135,063-156,194,798 | AX-156292826 |
| SGCD | rs73297178  | chr5:155,135,063-156,194,798 | AX-156275698 |
| SGCD | rs73297178  | chr5:155,135,063-156,194,798 | AX-156292827 |
| SGCD | ---         | chr5:155,135,063-156,194,798 | AX-14943710  |
| SGCD | rs79963846  | chr5:155,135,063-156,194,798 | AX-114216059 |
| SGCD | rs79963846  | chr5:155,135,063-156,194,798 | AX-156275699 |
| SGCD | rs6880966   | chr5:155,135,063-156,194,798 | AX-156275700 |
| SGCD | rs6880966   | chr5:155,135,063-156,194,798 | AX-156292828 |
| SGCD | rs11748068  | chr5:155,135,063-156,194,798 | AX-14943711  |
| SGCD | rs13358990  | chr5:155,135,063-156,194,798 | AX-41644785  |
| SGCD | rs6890183   | chr5:155,135,063-156,194,798 | AX-41644787  |
| SGCD | rs34260400  | chr5:155,135,063-156,194,798 | AX-156292829 |
| SGCD | rs73297179  | chr5:155,135,063-156,194,798 | AX-14943718  |
| SGCD | rs11749788  | chr5:155,135,063-156,194,798 | AX-148419817 |
| SGCD | rs11749788  | chr5:155,135,063-156,194,798 | AX-92510862  |
| SGCD | rs11738926  | chr5:155,135,063-156,194,798 | AX-148015920 |
| SGCD | rs11738926  | chr5:155,135,063-156,194,798 | AX-148669455 |
| SGCD | rs7717533   | chr5:155,135,063-156,194,798 | AX-11640809  |
| SGCD | rs73297180  | chr5:155,135,063-156,194,798 | AX-14943722  |
| SGCD | rs6876726   | chr5:155,135,063-156,194,798 | AX-14943724  |
| SGCD | rs11948829  | chr5:155,135,063-156,194,798 | AX-156275701 |
| SGCD | rs11948829  | chr5:155,135,063-156,194,798 | AX-156292830 |
| SGCD | rs79527093  | chr5:155,135,063-156,194,798 | AX-14943726  |
| SGCD | rs73297184  | chr5:155,135,063-156,194,798 | AX-14943727  |
| SGCD | rs1368301   | chr5:155,135,063-156,194,798 | AX-14943728  |
| SGCD | rs6874767   | chr5:155,135,063-156,194,798 | AX-11591424  |
| SGCD | rs75476567  | chr5:155,135,063-156,194,798 | AX-35170031  |
| SGCD | rs7727643   | chr5:155,135,063-156,194,798 | AX-12638365  |
| SGCD | rs60716901  | chr5:155,135,063-156,194,798 | AX-14943730  |
| SGCD | rs58558564  | chr5:155,135,063-156,194,798 | AX-14943731  |
| SGCD | rs253592    | chr5:155,135,063-156,194,798 | AX-14943733  |
| SGCD | rs1978450   | chr5:155,135,063-156,194,798 | AX-113734799 |
| SGCD | rs1978450   | chr5:155,135,063-156,194,798 | AX-156282350 |
| SGCD | rs28432313  | chr5:155,135,063-156,194,798 | AX-41644795  |
| SGCD | rs146445826 | chr5:155,135,063-156,194,798 | AX-151412833 |
| SGCD | rs146445826 | chr5:155,135,063-156,194,798 | AX-156298114 |
| SGCD | rs144623770 | chr5:155,135,063-156,194,798 | AX-156284839 |
| SGCD | rs78909890  | chr5:155,135,063-156,194,798 | AX-14943738  |
| SGCD | rs73297187  | chr5:155,135,063-156,194,798 | AX-156275702 |
| SGCD | rs73297187  | chr5:155,135,063-156,194,798 | AX-156292831 |
| SGCD | rs9686475   | chr5:155,135,063-156,194,798 | AX-156275703 |
| SGCD | rs73297188  | chr5:155,135,063-156,194,798 | AX-14943741  |
| SGCD | rs2312187   | chr5:155,135,063-156,194,798 | AX-14943743  |
| SGCD | rs2312188   | chr5:155,135,063-156,194,798 | AX-14943744  |
| SGCD | rs77074720  | chr5:155,135,063-156,194,798 | AX-35170039  |
| SGCD | rs2431769   | chr5:155,135,063-156,194,798 | AX-35170041  |
| SGCD | rs201119142 | chr5:155,135,063-156,194,798 | AX-151294464 |

|      |             |                              |              |
|------|-------------|------------------------------|--------------|
| SGCD | rs437395    | chr5:155,135,063-156,194,798 | AX-14943751  |
| SGCD | rs4705020   | chr5:155,135,063-156,194,798 | AX-41644799  |
| SGCD | rs447983    | chr5:155,135,063-156,194,798 | AX-14943752  |
| SGCD | rs60598425  | chr5:155,135,063-156,194,798 | AX-14943753  |
| SGCD | rs447938    | chr5:155,135,063-156,194,798 | AX-11507309  |
| SGCD | rs365187    | chr5:155,135,063-156,194,798 | AX-35170047  |
| SGCD | rs412201    | chr5:155,135,063-156,194,798 | AX-35170049  |
| SGCD | rs450151    | chr5:155,135,063-156,194,798 | AX-35170051  |
| SGCD | rs11955923  | chr5:155,135,063-156,194,798 | AX-14943757  |
| SGCD | rs11951246  | chr5:155,135,063-156,194,798 | AX-14943758  |
| SGCD | rs11951275  | chr5:155,135,063-156,194,798 | AX-156275704 |
| SGCD | rs11951275  | chr5:155,135,063-156,194,798 | AX-156292833 |
| SGCD | rs6880543   | chr5:155,135,063-156,194,798 | AX-14943764  |
| SGCD | rs146253791 | chr5:155,135,063-156,194,798 | AX-151392703 |
| SGCD | rs146253791 | chr5:155,135,063-156,194,798 | AX-156298471 |
| SGCD | rs73297195  | chr5:155,135,063-156,194,798 | AX-14943765  |
| SGCD | rs1036180   | chr5:155,135,063-156,194,798 | AX-35170059  |
| SGCD | rs73297198  | chr5:155,135,063-156,194,798 | AX-14943766  |
| SGCD | rs74412895  | chr5:155,135,063-156,194,798 | AX-35170061  |
| SGCD | rs10071360  | chr5:155,135,063-156,194,798 | AX-156275705 |
| SGCD | rs10071360  | chr5:155,135,063-156,194,798 | AX-156292834 |
| SGCD | rs7448097   | chr5:155,135,063-156,194,798 | AX-35170065  |
| SGCD | rs3846689   | chr5:155,135,063-156,194,798 | AX-156292835 |
| SGCD | rs80275589  | chr5:155,135,063-156,194,798 | AX-14943768  |
| SGCD | rs3857410   | chr5:155,135,063-156,194,798 | AX-12563743  |
| SGCD | rs7720258   | chr5:155,135,063-156,194,798 | AX-148762318 |
| SGCD | rs7720258   | chr5:155,135,063-156,194,798 | AX-156275707 |
| SGCD | rs7715587   | chr5:155,135,063-156,194,798 | AX-156282351 |
| SGCD | rs7715587   | chr5:155,135,063-156,194,798 | AX-156296990 |
| SGCD | rs4080412   | chr5:155,135,063-156,194,798 | AX-151126956 |
| SGCD | rs79782815  | chr5:155,135,063-156,194,798 | AX-14943771  |
| SGCD | rs11354048  | chr5:155,135,063-156,194,798 | AX-151271169 |
| SGCD | rs73297202  | chr5:155,135,063-156,194,798 | AX-14943772  |
| SGCD | rs6880030   | chr5:155,135,063-156,194,798 | AX-35170073  |
| SGCD | rs6880155   | chr5:155,135,063-156,194,798 | AX-148428605 |
| SGCD | rs111811162 | chr5:155,135,063-156,194,798 | AX-86896881  |
| SGCD | rs11135273  | chr5:155,135,063-156,194,798 | AX-14943774  |
| SGCD | rs11135274  | chr5:155,135,063-156,194,798 | AX-156275708 |
| SGCD | rs11740312  | chr5:155,135,063-156,194,798 | AX-35170075  |
| SGCD | rs61318634  | chr5:155,135,063-156,194,798 | AX-14943775  |
| SGCD | rs74746676  | chr5:155,135,063-156,194,798 | AX-35170077  |
| SGCD | rs111862138 | chr5:155,135,063-156,194,798 | AX-148418473 |
| SGCD | rs111862138 | chr5:155,135,063-156,194,798 | AX-148787811 |
| SGCD | rs112146477 | chr5:155,135,063-156,194,798 | AX-148287214 |
| SGCD | rs112146477 | chr5:155,135,063-156,194,798 | AX-156284109 |
| SGCD | rs171690    | chr5:155,135,063-156,194,798 | AX-14943779  |
| SGCD | rs10079506  | chr5:155,135,063-156,194,798 | AX-14943780  |
| SGCD | rs10055481  | chr5:155,135,063-156,194,798 | AX-35170087  |
| SGCD | rs78311701  | chr5:155,135,063-156,194,798 | AX-148740252 |
| SGCD | rs78311701  | chr5:155,135,063-156,194,798 | AX-156275709 |
| SGCD | rs199772807 | chr5:155,135,063-156,194,798 | AX-105159667 |
| SGCD | rs253605    | chr5:155,135,063-156,194,798 | AX-14943781  |
| SGCD | rs55634634  | chr5:155,135,063-156,194,798 | AX-14943782  |
| SGCD | rs7718591   | chr5:155,135,063-156,194,798 | AX-156275710 |
| SGCD | rs75776487  | chr5:155,135,063-156,194,798 | AX-14943784  |

|      |             |                              |              |
|------|-------------|------------------------------|--------------|
| SGCD | rs7730140   | chr5:155,135,063-156,194,798 | AX-41644803  |
| SGCD | rs73299105  | chr5:155,135,063-156,194,798 | AX-14943785  |
| SGCD | rs74869065  | chr5:155,135,063-156,194,798 | AX-14943786  |
| SGCD | rs57484573  | chr5:155,135,063-156,194,798 | AX-122206137 |
| SGCD | rs57484573  | chr5:155,135,063-156,194,798 | AX-156298450 |
| SGCD | rs11742816  | chr5:155,135,063-156,194,798 | AX-14943790  |
| SGCD | rs17559950  | chr5:155,135,063-156,194,798 | AX-14943792  |
| SGCD | rs253606    | chr5:155,135,063-156,194,798 | AX-86898080  |
| SGCD | rs73812688  | chr5:155,135,063-156,194,798 | AX-35170095  |
| SGCD | rs73299107  | chr5:155,135,063-156,194,798 | AX-35170097  |
| SGCD | rs10069144  | chr5:155,135,063-156,194,798 | AX-12380330  |
| SGCD | rs17640310  | chr5:155,135,063-156,194,798 | AX-12502326  |
| SGCD | rs7718881   | chr5:155,135,063-156,194,798 | AX-41644807  |
| SGCD | rs60989660  | chr5:155,135,063-156,194,798 | AX-14943799  |
| SGCD | rs73299111  | chr5:155,135,063-156,194,798 | AX-14943802  |
| SGCD | rs10052818  | chr5:155,135,063-156,194,798 | AX-14943804  |
| SGCD | rs74466783  | chr5:155,135,063-156,194,798 | AX-14943805  |
| SGCD | rs73299113  | chr5:155,135,063-156,194,798 | AX-14943806  |
| SGCD | rs4382149   | chr5:155,135,063-156,194,798 | AX-14943807  |
| SGCD | rs17640346  | chr5:155,135,063-156,194,798 | AX-156275712 |
| SGCD | rs17640346  | chr5:155,135,063-156,194,798 | AX-156292837 |
| SGCD | rs253607    | chr5:155,135,063-156,194,798 | AX-35170105  |
| SGCD | rs17640369  | chr5:155,135,063-156,194,798 | AX-14943808  |
| SGCD | rs6556717   | chr5:155,135,063-156,194,798 | AX-12602551  |
| SGCD | rs934418    | chr5:155,135,063-156,194,798 | AX-14943812  |
| SGCD | rs77667734  | chr5:155,135,063-156,194,798 | AX-148803726 |
| SGCD | rs77667734  | chr5:155,135,063-156,194,798 | AX-156278663 |
| SGCD | rs112881066 | chr5:155,135,063-156,194,798 | AX-148789121 |
| SGCD | rs112881066 | chr5:155,135,063-156,194,798 | AX-156284110 |
| SGCD | rs113980265 | chr5:155,135,063-156,194,798 | AX-96791935  |
| SGCD | rs10214042  | chr5:155,135,063-156,194,798 | AX-121254438 |
| SGCD | rs10214042  | chr5:155,135,063-156,194,798 | AX-148123835 |
| SGCD | rs55975207  | chr5:155,135,063-156,194,798 | AX-122474798 |
| SGCD | rs55975207  | chr5:155,135,063-156,194,798 | AX-96630193  |
| SGCD | rs56390385  | chr5:155,135,063-156,194,798 | AX-148142989 |
| SGCD | rs56390385  | chr5:155,135,063-156,194,798 | AX-156284111 |
| SGCD | rs147919561 | chr5:155,135,063-156,194,798 | AX-148788855 |
| SGCD | rs147919561 | chr5:155,135,063-156,194,798 | AX-156284112 |
| SGCD | rs10040642  | chr5:155,135,063-156,194,798 | AX-96687710  |
| SGCD | rs147791143 | chr5:155,135,063-156,194,798 | AX-148723324 |
| SGCD | rs147791143 | chr5:155,135,063-156,194,798 | AX-156284113 |
| SGCD | rs9687336   | chr5:155,135,063-156,194,798 | AX-151402247 |
| SGCD | rs9687336   | chr5:155,135,063-156,194,798 | AX-156284114 |
| SGCD | rs111596506 | chr5:155,135,063-156,194,798 | AX-148588618 |
| SGCD | rs111596506 | chr5:155,135,063-156,194,798 | AX-156284115 |
| SGCD | rs139288409 | chr5:155,135,063-156,194,798 | AX-120511009 |
| SGCD | rs139288409 | chr5:155,135,063-156,194,798 | AX-148599889 |
| SGCD | rs147232585 | chr5:155,135,063-156,194,798 | AX-148789014 |
| SGCD | rs147232585 | chr5:155,135,063-156,194,798 | AX-156284116 |
| SGCD | rs6883510   | chr5:155,135,063-156,194,798 | AX-148159420 |
| SGCD | rs6883510   | chr5:155,135,063-156,194,798 | AX-156275713 |
| SGCD | rs11135286  | chr5:155,135,063-156,194,798 | AX-105115286 |
| SGCD | rs11135286  | chr5:155,135,063-156,194,798 | AX-156275714 |
| SGCD | rs11135287  | chr5:155,135,063-156,194,798 | AX-151174257 |
| SGCD | rs11135287  | chr5:155,135,063-156,194,798 | AX-151219012 |

|      |             |                              |              |
|------|-------------|------------------------------|--------------|
| SGCD | ---         | chr5:155,135,063-156,194,798 | AX-148070038 |
| SGCD | ---         | chr5:155,135,063-156,194,798 | AX-156275715 |
| SGCD | rs80206401  | chr5:155,135,063-156,194,798 | AX-148548965 |
| SGCD | rs80206401  | chr5:155,135,063-156,194,798 | AX-156284117 |
| SGCD | rs6894554   | chr5:155,135,063-156,194,798 | AX-148438707 |
| SGCD | rs6894554   | chr5:155,135,063-156,194,798 | AX-156275716 |
| SGCD | rs7706946   | chr5:155,135,063-156,194,798 | AX-156275717 |
| SGCD | rs12520121  | chr5:155,135,063-156,194,798 | AX-35170115  |
| SGCD | rs6859694   | chr5:155,135,063-156,194,798 | AX-148191879 |
| SGCD | rs6859694   | chr5:155,135,063-156,194,798 | AX-156275718 |
| SGCD | rs6887546   | chr5:155,135,063-156,194,798 | AX-156275719 |
| SGCD | rs6887546   | chr5:155,135,063-156,194,798 | AX-156292838 |
| SGCD | rs6860238   | chr5:155,135,063-156,194,798 | AX-156275720 |
| SGCD | rs6860238   | chr5:155,135,063-156,194,798 | AX-156292839 |
| SGCD | rs10077734  | chr5:155,135,063-156,194,798 | AX-14943817  |
| SGCD | rs146842955 | chr5:155,135,063-156,194,798 | AX-156285315 |
| SGCD | ---         | chr5:155,135,063-156,194,798 | AX-14943821  |
| SGCD | rs75354763  | chr5:155,135,063-156,194,798 | AX-156275722 |
| SGCD | rs75354763  | chr5:155,135,063-156,194,798 | AX-156292840 |
| SGCD | rs17053637  | chr5:155,135,063-156,194,798 | AX-156282353 |
| SGCD | ---         | chr5:155,135,063-156,194,798 | AX-122561120 |
| SGCD | rs2436327   | chr5:155,135,063-156,194,798 | AX-41644811  |
| SGCD | rs2431401   | chr5:155,135,063-156,194,798 | AX-156282354 |
| SGCD | rs2431401   | chr5:155,135,063-156,194,798 | AX-156296992 |
| SGCD | rs6864938   | chr5:155,135,063-156,194,798 | AX-14943832  |
| SGCD | rs7710178   | chr5:155,135,063-156,194,798 | AX-12637757  |
| SGCD | rs10077411  | chr5:155,135,063-156,194,798 | AX-11091256  |
| SGCD | rs113379066 | chr5:155,135,063-156,194,798 | AX-113734801 |
| SGCD | rs113379066 | chr5:155,135,063-156,194,798 | AX-156292841 |
| SGCD | rs72801154  | chr5:155,135,063-156,194,798 | AX-35170131  |
| SGCD | rs2277956   | chr5:155,135,063-156,194,798 | AX-41644827  |
| SGCD | rs280475    | chr5:155,135,063-156,194,798 | AX-14943840  |
| SGCD | ---         | chr5:155,135,063-156,194,798 | AX-86560220  |
| SGCD | rs181875    | chr5:155,135,063-156,194,798 | AX-14943842  |
| SGCD | rs72801155  | chr5:155,135,063-156,194,798 | AX-35170135  |
| SGCD | rs3797574   | chr5:155,135,063-156,194,798 | AX-156292842 |
| SGCD | rs157292    | chr5:155,135,063-156,194,798 | AX-12470271  |
| SGCD | rs157292    | chr5:155,135,063-156,194,798 | AX-156292843 |
| SGCD | rs157293    | chr5:155,135,063-156,194,798 | AX-14943845  |
| SGCD | rs3797577   | chr5:155,135,063-156,194,798 | AX-14943848  |
| SGCD | rs73299128  | chr5:155,135,063-156,194,798 | AX-14943850  |
| SGCD | rs201111387 | chr5:155,135,063-156,194,798 | AX-14943852  |
| SGCD | rs201111387 | chr5:155,135,063-156,194,798 | AX-151161354 |
| SGCD | rs157290    | chr5:155,135,063-156,194,798 | AX-156275724 |
| SGCD | rs157290    | chr5:155,135,063-156,194,798 | AX-156292844 |
| SGCD | rs157291    | chr5:155,135,063-156,194,798 | AX-35170143  |
| SGCD | rs60105121  | chr5:155,135,063-156,194,798 | AX-14943853  |
| SGCD | rs10515738  | chr5:155,135,063-156,194,798 | AX-41644837  |
| SGCD | rs73299136  | chr5:155,135,063-156,194,798 | AX-14943857  |
| SGCD | rs73299137  | chr5:155,135,063-156,194,798 | AX-156275725 |
| SGCD | rs73299137  | chr5:155,135,063-156,194,798 | AX-156292845 |
| SGCD | rs11739522  | chr5:155,135,063-156,194,798 | AX-14943858  |
| SGCD | rs7714176   | chr5:155,135,063-156,194,798 | AX-14943861  |
| SGCD | rs73299139  | chr5:155,135,063-156,194,798 | AX-14943862  |
| SGCD | rs73299140  | chr5:155,135,063-156,194,798 | AX-14943863  |

|      |             |                              |              |
|------|-------------|------------------------------|--------------|
| SGCD | rs888842    | chr5:155,135,063-156,194,798 | AX-14943864  |
| SGCD | rs7720093   | chr5:155,135,063-156,194,798 | AX-41644847  |
| SGCD | rs7715397   | chr5:155,135,063-156,194,798 | AX-41644849  |
| SGCD | rs6872066   | chr5:155,135,063-156,194,798 | AX-35170159  |
| SGCD | rs6556729   | chr5:155,135,063-156,194,798 | AX-35170161  |
| SGCD | rs76814622  | chr5:155,135,063-156,194,798 | AX-35170163  |
| SGCD | rs142300885 | chr5:155,135,063-156,194,798 | AX-156286411 |
| SGCD | rs280468    | chr5:155,135,063-156,194,798 | AX-35170165  |
| SGCD | rs280469    | chr5:155,135,063-156,194,798 | AX-156282355 |
| SGCD | rs280470    | chr5:155,135,063-156,194,798 | AX-14943868  |
| SGCD | rs76906458  | chr5:155,135,063-156,194,798 | AX-35170167  |
| SGCD | rs35305422  | chr5:155,135,063-156,194,798 | AX-41644855  |
| SGCD | rs280471    | chr5:155,135,063-156,194,798 | AX-148711153 |
| SGCD | rs280471    | chr5:155,135,063-156,194,798 | AX-156275726 |
| SGCD | rs182203    | chr5:155,135,063-156,194,798 | AX-14943874  |
| SGCD | rs280472    | chr5:155,135,063-156,194,798 | AX-156275728 |
| SGCD | rs203997    | chr5:155,135,063-156,194,798 | AX-156275729 |
| SGCD | rs10068837  | chr5:155,135,063-156,194,798 | AX-113078911 |
| SGCD | rs10068837  | chr5:155,135,063-156,194,798 | AX-148466084 |
| SGCD | rs73299146  | chr5:155,135,063-156,194,798 | AX-148636106 |
| SGCD | rs73299146  | chr5:155,135,063-156,194,798 | AX-156275730 |
| SGCD | rs563016540 | chr5:155,135,063-156,194,798 | AX-151352909 |
| SGCD | rs563016540 | chr5:155,135,063-156,194,798 | AX-156298075 |
| SGCD | rs11957615  | chr5:155,135,063-156,194,798 | AX-156275731 |
| SGCD | rs11957615  | chr5:155,135,063-156,194,798 | AX-156292849 |
| SGCD | rs280473    | chr5:155,135,063-156,194,798 | AX-41644861  |
| SGCD | rs35321875  | chr5:155,135,063-156,194,798 | AX-156292850 |
| SGCD | rs77081211  | chr5:155,135,063-156,194,798 | AX-156285191 |
| SGCD | rs73299150  | chr5:155,135,063-156,194,798 | AX-156275733 |
| SGCD | rs73299150  | chr5:155,135,063-156,194,798 | AX-156292851 |
| SGCD | rs73299153  | chr5:155,135,063-156,194,798 | AX-14943879  |
| SGCD | rs280474    | chr5:155,135,063-156,194,798 | AX-156292852 |
| SGCD | rs73299154  | chr5:155,135,063-156,194,798 | AX-14943880  |
| SGCD | rs73299156  | chr5:155,135,063-156,194,798 | AX-148653635 |
| SGCD | rs1833609   | chr5:155,135,063-156,194,798 | AX-156268286 |
| SGCD | rs1833609   | chr5:155,135,063-156,194,798 | AX-156288113 |
| SGCD | rs6556736   | chr5:155,135,063-156,194,798 | AX-156282356 |
| SGCD | rs6556736   | chr5:155,135,063-156,194,798 | AX-156296994 |
| SGCD | rs6890122   | chr5:155,135,063-156,194,798 | AX-151357561 |
| SGCD | rs6890122   | chr5:155,135,063-156,194,798 | AX-156282357 |
| SGCD | rs6895333   | chr5:155,135,063-156,194,798 | AX-156296995 |
| SGCD | rs11953051  | chr5:155,135,063-156,194,798 | AX-156296996 |
| SGCD | rs76657545  | chr5:155,135,063-156,194,798 | AX-14943882  |
| SGCD | rs9314007   | chr5:155,135,063-156,194,798 | AX-153719393 |
| SGCD | rs9314007   | chr5:155,135,063-156,194,798 | AX-153739380 |
| SGCD | ---         | chr5:155,135,063-156,194,798 | AX-156282360 |
| SGCD | rs366643    | chr5:155,135,063-156,194,798 | AX-148209264 |
| SGCD | rs73299159  | chr5:155,135,063-156,194,798 | AX-156282362 |
| SGCD | rs73299159  | chr5:155,135,063-156,194,798 | AX-156296998 |
| SGCD | rs145050755 | chr5:155,135,063-156,194,798 | AX-156286322 |
| SGCD | rs149206504 | chr5:155,135,063-156,194,798 | AX-122780654 |
| SGCD | rs149206504 | chr5:155,135,063-156,194,798 | AX-156284118 |
| SGCD | rs9885279   | chr5:155,135,063-156,194,798 | AX-105173362 |
| SGCD | rs9885279   | chr5:155,135,063-156,194,798 | AX-96633999  |
| SGCD | rs9885282   | chr5:155,135,063-156,194,798 | AX-156282363 |

|      |             |                              |              |
|------|-------------|------------------------------|--------------|
| SGCD | rs9885311   | chr5:155,135,063-156,194,798 | AX-95864977  |
| SGCD | rs9885311   | chr5:155,135,063-156,194,798 | AX-96648753  |
| SGCD | rs143543864 | chr5:155,135,063-156,194,798 | AX-148783480 |
| SGCD | rs143543864 | chr5:155,135,063-156,194,798 | AX-156284119 |
| SGCD | rs150496590 | chr5:155,135,063-156,194,798 | AX-120620889 |
| SGCD | rs150496590 | chr5:155,135,063-156,194,798 | AX-156284120 |
| SGCD | rs189904433 | chr5:155,135,063-156,194,798 | AX-119990862 |
| SGCD | rs189904433 | chr5:155,135,063-156,194,798 | AX-148083014 |
| SGCD | rs192112737 | chr5:155,135,063-156,194,798 | AX-148784208 |
| SGCD | rs192112737 | chr5:155,135,063-156,194,798 | AX-96870230  |
| SGCD | rs149255623 | chr5:155,135,063-156,194,798 | AX-119414695 |
| SGCD | rs149255623 | chr5:155,135,063-156,194,798 | AX-151404715 |
| SGCD | rs148208831 | chr5:155,135,063-156,194,798 | AX-120660876 |
| SGCD | rs148208831 | chr5:155,135,063-156,194,798 | AX-120921945 |
| SGCD | rs144089755 | chr5:155,135,063-156,194,798 | AX-123001580 |
| SGCD | rs144089755 | chr5:155,135,063-156,194,798 | AX-149461608 |
| SGCD | rs146004678 | chr5:155,135,063-156,194,798 | AX-151410424 |
| SGCD | rs146004678 | chr5:155,135,063-156,194,798 | AX-156284121 |
| SGCD | rs11956458  | chr5:155,135,063-156,194,798 | AX-113578874 |
| SGCD | rs11956458  | chr5:155,135,063-156,194,798 | AX-148764402 |
| SGCD | rs11955254  | chr5:155,135,063-156,194,798 | AX-148783222 |
| SGCD | rs11955254  | chr5:155,135,063-156,194,798 | AX-156284122 |
| SGCD | ---         | chr5:155,135,063-156,194,798 | AX-151319793 |
| SGCD | ---         | chr5:155,135,063-156,194,798 | AX-156284808 |
| SGCD | rs141873448 | chr5:155,135,063-156,194,798 | AX-113590779 |
| SGCD | rs141873448 | chr5:155,135,063-156,194,798 | AX-148713815 |
| SGCD | rs7717319   | chr5:155,135,063-156,194,798 | AX-151293733 |
| SGCD | rs7717319   | chr5:155,135,063-156,194,798 | AX-156284123 |
| SGCD | rs113954092 | chr5:155,135,063-156,194,798 | AX-148204395 |
| SGCD | rs113954092 | chr5:155,135,063-156,194,798 | AX-156284124 |
| SGCD | rs188563161 | chr5:155,135,063-156,194,798 | AX-88317894  |
| SGCD | rs149394887 | chr5:155,135,063-156,194,798 | AX-151187573 |
| SGCD | rs149394887 | chr5:155,135,063-156,194,798 | AX-156284125 |
| SGCD | rs143073862 | chr5:155,135,063-156,194,798 | AX-113113245 |
| SGCD | rs143073862 | chr5:155,135,063-156,194,798 | AX-156284126 |
| SGCD | rs11957592  | chr5:155,135,063-156,194,798 | AX-148638677 |
| SGCD | rs11953741  | chr5:155,135,063-156,194,798 | AX-148799434 |
| SGCD | rs11953741  | chr5:155,135,063-156,194,798 | AX-156284127 |
| SGCD | rs138095347 | chr5:155,135,063-156,194,798 | AX-148664909 |
| SGCD | rs138095347 | chr5:155,135,063-156,194,798 | AX-156284128 |
| SGCD | ---         | chr5:155,135,063-156,194,798 | AX-151395167 |
| SGCD | ---         | chr5:155,135,063-156,194,798 | AX-156284129 |
| SGCD | rs189047611 | chr5:155,135,063-156,194,798 | AX-148131209 |
| SGCD | rs189047611 | chr5:155,135,063-156,194,798 | AX-148678366 |
| SGCD | rs144286229 | chr5:155,135,063-156,194,798 | AX-148529666 |
| SGCD | rs144286229 | chr5:155,135,063-156,194,798 | AX-156284130 |
| SGCD | rs280453    | chr5:155,135,063-156,194,798 | AX-92496998  |
| SGCD | rs60774908  | chr5:155,135,063-156,194,798 | AX-151367476 |
| SGCD | rs60774908  | chr5:155,135,063-156,194,798 | AX-156284131 |
| SGCD | rs56959778  | chr5:155,135,063-156,194,798 | AX-148677935 |
| SGCD | rs56959778  | chr5:155,135,063-156,194,798 | AX-156284132 |
| SGCD | rs147755620 | chr5:155,135,063-156,194,798 | AX-148852712 |
| SGCD | rs147755620 | chr5:155,135,063-156,194,798 | AX-156284133 |
| SGCD | rs112696830 | chr5:155,135,063-156,194,798 | AX-148139338 |
| SGCD | rs112696830 | chr5:155,135,063-156,194,798 | AX-149273688 |

|      |             |                              |              |
|------|-------------|------------------------------|--------------|
| SGCD | rs280455    | chr5:155,135,063-156,194,798 | AX-148085112 |
| SGCD | rs280455    | chr5:155,135,063-156,194,798 | AX-156282364 |
| SGCD | rs113568042 | chr5:155,135,063-156,194,798 | AX-113547835 |
| SGCD | rs113568042 | chr5:155,135,063-156,194,798 | AX-148105050 |
| SGCD | rs12519349  | chr5:155,135,063-156,194,798 | AX-121863665 |
| SGCD | rs12519349  | chr5:155,135,063-156,194,798 | AX-150507622 |
| SGCD | rs12521380  | chr5:155,135,063-156,194,798 | AX-151189162 |
| SGCD | rs12521380  | chr5:155,135,063-156,194,798 | AX-156284134 |
| SGCD | rs60841274  | chr5:155,135,063-156,194,798 | AX-148682120 |
| SGCD | rs60841274  | chr5:155,135,063-156,194,798 | AX-156284135 |
| SGCD | rs57210770  | chr5:155,135,063-156,194,798 | AX-148654699 |
| SGCD | rs57210770  | chr5:155,135,063-156,194,798 | AX-156284136 |
| SGCD | rs59036281  | chr5:155,135,063-156,194,798 | AX-148036666 |
| SGCD | rs59036281  | chr5:155,135,063-156,194,798 | AX-148671922 |
| SGCD | rs73299171  | chr5:155,135,063-156,194,798 | AX-14943888  |
| SGCD | rs73299173  | chr5:155,135,063-156,194,798 | AX-14943889  |
| SGCD | rs74577265  | chr5:155,135,063-156,194,798 | AX-35170207  |
| SGCD | rs73299175  | chr5:155,135,063-156,194,798 | AX-156282366 |
| SGCD | rs73299175  | chr5:155,135,063-156,194,798 | AX-156296999 |
| SGCD | rs280456    | chr5:155,135,063-156,194,798 | AX-14943890  |
| SGCD | rs73815171  | chr5:155,135,063-156,194,798 | AX-14943891  |
| SGCD | rs400303    | chr5:155,135,063-156,194,798 | AX-14943892  |
| SGCD | rs280457    | chr5:155,135,063-156,194,798 | AX-14943895  |
| SGCD | rs280458    | chr5:155,135,063-156,194,798 | AX-14943896  |
| SGCD | rs280459    | chr5:155,135,063-156,194,798 | AX-14943897  |
| SGCD | rs57911436  | chr5:155,135,063-156,194,798 | AX-14943899  |
| SGCD | rs6877118   | chr5:155,135,063-156,194,798 | AX-41644871  |
| SGCD | rs73299180  | chr5:155,135,063-156,194,798 | AX-14943903  |
| SGCD | ---         | chr5:155,135,063-156,194,798 | AX-41644873  |
| SGCD | rs73299183  | chr5:155,135,063-156,194,798 | AX-35170219  |
| SGCD | rs78706094  | chr5:155,135,063-156,194,798 | AX-14943906  |
| SGCD | rs77177982  | chr5:155,135,063-156,194,798 | AX-156275736 |
| SGCD | rs77177982  | chr5:155,135,063-156,194,798 | AX-156292853 |
| SGCD | rs10611348  | chr5:155,135,063-156,194,798 | AX-151296659 |
| SGCD | rs10611348  | chr5:155,135,063-156,194,798 | AX-156298390 |
| SGCD | rs280461    | chr5:155,135,063-156,194,798 | AX-41644875  |
| SGCD | rs73299187  | chr5:155,135,063-156,194,798 | AX-14943910  |
| SGCD | rs280462    | chr5:155,135,063-156,194,798 | AX-11411368  |
| SGCD | rs73299189  | chr5:155,135,063-156,194,798 | AX-14943911  |
| SGCD | rs73299190  | chr5:155,135,063-156,194,798 | AX-14943912  |
| SGCD | rs78787033  | chr5:155,135,063-156,194,798 | AX-156275737 |
| SGCD | rs78787033  | chr5:155,135,063-156,194,798 | AX-156292854 |
| SGCD | rs80072297  | chr5:155,135,063-156,194,798 | AX-35170225  |
| SGCD | rs73299193  | chr5:155,135,063-156,194,798 | AX-14943913  |
| SGCD | rs73299195  | chr5:155,135,063-156,194,798 | AX-14943914  |
| SGCD | rs280463    | chr5:155,135,063-156,194,798 | AX-14943916  |
| SGCD | rs76893442  | chr5:155,135,063-156,194,798 | AX-14943917  |
| SGCD | rs144351878 | chr5:155,135,063-156,194,798 | AX-151410476 |
| SGCD | rs144351878 | chr5:155,135,063-156,194,798 | AX-156297763 |
| SGCD | rs73299198  | chr5:155,135,063-156,194,798 | AX-14943918  |
| SGCD | rs114645617 | chr5:155,135,063-156,194,798 | AX-14943919  |
| SGCD | rs280464    | chr5:155,135,063-156,194,798 | AX-148072026 |
| SGCD | rs11949585  | chr5:155,135,063-156,194,798 | AX-14943921  |
| SGCD | rs280465    | chr5:155,135,063-156,194,798 | AX-35170229  |
| SGCD | rs62380868  | chr5:155,135,063-156,194,798 | AX-35170231  |

|      |             |                              |              |
|------|-------------|------------------------------|--------------|
| SGCD | rs280466    | chr5:155,135,063-156,194,798 | AX-14943923  |
| SGCD | rs73299201  | chr5:155,135,063-156,194,798 | AX-14943925  |
| SGCD | rs17053678  | chr5:155,135,063-156,194,798 | AX-41644887  |
| SGCD | rs57944803  | chr5:155,135,063-156,194,798 | AX-14943927  |
| SGCD | rs73299202  | chr5:155,135,063-156,194,798 | AX-35170237  |
| SGCD | rs280467    | chr5:155,135,063-156,194,798 | AX-156275738 |
| SGCD | rs59205688  | chr5:155,135,063-156,194,798 | AX-14943929  |
| SGCD | rs73301108  | chr5:155,135,063-156,194,798 | AX-14943930  |
| SGCD | rs111415262 | chr5:155,135,063-156,194,798 | AX-148789664 |
| SGCD | rs111415262 | chr5:155,135,063-156,194,798 | AX-156284137 |
| SGCD | rs6860519   | chr5:155,135,063-156,194,798 | AX-14943938  |
| SGCD | rs1363743   | chr5:155,135,063-156,194,798 | AX-41644891  |
| SGCD | rs11948320  | chr5:155,135,063-156,194,798 | AX-12423861  |
| SGCD | rs73301123  | chr5:155,135,063-156,194,798 | AX-14943943  |
| SGCD | rs17561110  | chr5:155,135,063-156,194,798 | AX-113251390 |
| SGCD | rs17561110  | chr5:155,135,063-156,194,798 | AX-156292856 |
| SGCD | rs17561145  | chr5:155,135,063-156,194,798 | AX-14943945  |
| SGCD | rs11743012  | chr5:155,135,063-156,194,798 | AX-41644897  |
| SGCD | rs11740282  | chr5:155,135,063-156,194,798 | AX-151332444 |
| SGCD | rs11740282  | chr5:155,135,063-156,194,798 | AX-156284138 |
| SGCD | rs1363742   | chr5:155,135,063-156,194,798 | AX-14943955  |
| SGCD | ---         | chr5:155,135,063-156,194,798 | AX-156297612 |
| SGCD | rs79258400  | chr5:155,135,063-156,194,798 | AX-14943957  |
| SGCD | rs7723780   | chr5:155,135,063-156,194,798 | AX-14943958  |
| SGCD | rs56785833  | chr5:155,135,063-156,194,798 | AX-156298451 |
| SGCD | rs56785833  | chr5:155,135,063-156,194,798 | AX-38254451  |
| SGCD | rs1422220   | chr5:155,135,063-156,194,798 | AX-156282367 |
| SGCD | rs1422220   | chr5:155,135,063-156,194,798 | AX-156297000 |
| SGCD | rs76711652  | chr5:155,135,063-156,194,798 | AX-35170253  |
| SGCD | rs11743091  | chr5:155,135,063-156,194,798 | AX-14943960  |
| SGCD | rs151318600 | chr5:155,135,063-156,194,798 | AX-151424786 |
| SGCD | rs151318600 | chr5:155,135,063-156,194,798 | AX-156297854 |
| SGCD | rs6886792   | chr5:155,135,063-156,194,798 | AX-14943968  |
| SGCD | rs6871079   | chr5:155,135,063-156,194,798 | AX-14943969  |
| SGCD | rs4331879   | chr5:155,135,063-156,194,798 | AX-148124001 |
| SGCD | rs4331879   | chr5:155,135,063-156,194,798 | AX-156275739 |
| SGCD | rs4355508   | chr5:155,135,063-156,194,798 | AX-105087015 |
| SGCD | rs4355508   | chr5:155,135,063-156,194,798 | AX-148225318 |
| SGCD | rs4295372   | chr5:155,135,063-156,194,798 | AX-114066099 |
| SGCD | rs4295372   | chr5:155,135,063-156,194,798 | AX-84629682  |
| SGCD | rs11743435  | chr5:155,135,063-156,194,798 | AX-122367896 |
| SGCD | rs11743435  | chr5:155,135,063-156,194,798 | AX-156275740 |
| SGCD | rs10068125  | chr5:155,135,063-156,194,798 | AX-35170259  |
| SGCD | rs281047    | chr5:155,135,063-156,194,798 | AX-11411749  |
| SGCD | rs80220415  | chr5:155,135,063-156,194,798 | AX-35170261  |
| SGCD | rs6872094   | chr5:155,135,063-156,194,798 | AX-12612674  |
| SGCD | rs42685     | chr5:155,135,063-156,194,798 | AX-14943977  |
| SGCD | rs73301125  | chr5:155,135,063-156,194,798 | AX-14943979  |
| SGCD | rs32063     | chr5:155,135,063-156,194,798 | AX-14943981  |
| SGCD | rs6877490   | chr5:155,135,063-156,194,798 | AX-11591578  |
| SGCD | rs71822411  | chr5:155,135,063-156,194,798 | AX-151439558 |
| SGCD | rs71822411  | chr5:155,135,063-156,194,798 | AX-156298241 |
| SGCD | rs32062     | chr5:155,135,063-156,194,798 | AX-14943983  |
| SGCD | rs41074     | chr5:155,135,063-156,194,798 | AX-113251392 |
| SGCD | rs157320    | chr5:155,135,063-156,194,798 | AX-156275742 |



|      |             |                              |              |
|------|-------------|------------------------------|--------------|
| SGCD | rs40486     | chr5:155,135,063-156,194,798 | AX-14943984  |
| SGCD | rs59802535  | chr5:155,135,063-156,194,798 | AX-14943985  |
| SGCD | rs32061     | chr5:155,135,063-156,194,798 | AX-14943986  |
| SGCD | rs32060     | chr5:155,135,063-156,194,798 | AX-11436952  |
| SGCD | rs185246    | chr5:155,135,063-156,194,798 | AX-14943991  |
| SGCD | rs73301129  | chr5:155,135,063-156,194,798 | AX-14943993  |
| SGCD | rs75599360  | chr5:155,135,063-156,194,798 | AX-14943994  |
| SGCD | rs76867717  | chr5:155,135,063-156,194,798 | AX-35170271  |
| SGCD | rs32059     | chr5:155,135,063-156,194,798 | AX-41644915  |
| SGCD | rs32058     | chr5:155,135,063-156,194,798 | AX-14943995  |
| SGCD | rs10476477  | chr5:155,135,063-156,194,798 | AX-119518449 |
| SGCD | rs10476477  | chr5:155,135,063-156,194,798 | AX-148458543 |
| SGCD | rs73301135  | chr5:155,135,063-156,194,798 | AX-14943997  |
| SGCD | rs41073     | chr5:155,135,063-156,194,798 | AX-14943998  |
| SGCD | rs32057     | chr5:155,135,063-156,194,798 | AX-14944000  |
| SGCD | rs434847    | chr5:155,135,063-156,194,798 | AX-41644919  |
| SGCD | rs434116    | chr5:155,135,063-156,194,798 | AX-41644921  |
| SGCD | rs446261    | chr5:155,135,063-156,194,798 | AX-113251394 |
| SGCD | rs394183    | chr5:155,135,063-156,194,798 | AX-14944005  |
| SGCD | rs452986    | chr5:155,135,063-156,194,798 | AX-41644925  |
| SGCD | rs74617632  | chr5:155,135,063-156,194,798 | AX-156275745 |
| SGCD | rs74617632  | chr5:155,135,063-156,194,798 | AX-156292857 |
| SGCD | rs17053716  | chr5:155,135,063-156,194,798 | AX-41644927  |
| SGCD | rs32056     | chr5:155,135,063-156,194,798 | AX-14944009  |
| SGCD | rs39925     | chr5:155,135,063-156,194,798 | AX-12565395  |
| SGCD | rs141437738 | chr5:155,135,063-156,194,798 | AX-120746105 |
| SGCD | rs141437738 | chr5:155,135,063-156,194,798 | AX-156285954 |
| SGCD | rs32055     | chr5:155,135,063-156,194,798 | AX-35170279  |
| SGCD | rs39924     | chr5:155,135,063-156,194,798 | AX-35170283  |
| SGCD | rs32054     | chr5:155,135,063-156,194,798 | AX-14944015  |
| SGCD | rs460462    | chr5:155,135,063-156,194,798 | AX-35170285  |
| SGCD | rs462375    | chr5:155,135,063-156,194,798 | AX-148493640 |
| SGCD | rs462375    | chr5:155,135,063-156,194,798 | AX-156275746 |
| SGCD | rs7705897   | chr5:155,135,063-156,194,798 | AX-156275747 |
| SGCD | rs7705897   | chr5:155,135,063-156,194,798 | AX-98051292  |
| SGCD | rs7721216   | chr5:155,135,063-156,194,798 | AX-105049721 |
| SGCD | rs7721216   | chr5:155,135,063-156,194,798 | AX-88316465  |
| SGCD | rs7709957   | chr5:155,135,063-156,194,798 | AX-148092320 |
| SGCD | rs7709957   | chr5:155,135,063-156,194,798 | AX-148705168 |
| SGCD | rs9314041   | chr5:155,135,063-156,194,798 | AX-120016694 |
| SGCD | rs9314041   | chr5:155,135,063-156,194,798 | AX-156275748 |
| SGCD | rs10491464  | chr5:155,135,063-156,194,798 | AX-11110442  |
| SGCD | rs138183547 | chr5:155,135,063-156,194,798 | AX-156286311 |
| SGCD | rs10077414  | chr5:155,135,063-156,194,798 | AX-156268287 |
| SGCD | rs10077414  | chr5:155,135,063-156,194,798 | AX-156288114 |
| SGCD | ---         | chr5:155,135,063-156,194,798 | AX-151423345 |
| SGCD | ---         | chr5:155,135,063-156,194,798 | AX-156268288 |
| SGCD | rs415118    | chr5:155,135,063-156,194,798 | AX-156268289 |
| SGCD | rs415118    | chr5:155,135,063-156,194,798 | AX-156288115 |
| SGCD | rs449858    | chr5:155,135,063-156,194,798 | AX-156282368 |
| SGCD | rs408310    | chr5:155,135,063-156,194,798 | AX-148482969 |
| SGCD | rs408310    | chr5:155,135,063-156,194,798 | AX-156282369 |
| SGCD | rs693752    | chr5:155,135,063-156,194,798 | AX-156282370 |
| SGCD | rs693752    | chr5:155,135,063-156,194,798 | AX-156297002 |
| SGCD | rs4704806   | chr5:155,135,063-156,194,798 | AX-122200372 |

|      |             |                              |              |
|------|-------------|------------------------------|--------------|
| SGCD | rs4704806   | chr5:155,135,063-156,194,798 | AX-148740382 |
| SGCD | rs182211    | chr5:155,135,063-156,194,798 | AX-148757760 |
| SGCD | rs182211    | chr5:155,135,063-156,194,798 | AX-156282371 |
| SGCD | rs73301167  | chr5:155,135,063-156,194,798 | AX-148816037 |
| SGCD | rs73301167  | chr5:155,135,063-156,194,798 | AX-156282372 |
| SGCD | rs7731165   | chr5:155,135,063-156,194,798 | AX-35170299  |
| SGCD | rs112277348 | chr5:155,135,063-156,194,798 | AX-148812347 |
| SGCD | rs112277348 | chr5:155,135,063-156,194,798 | AX-156275749 |
| SGCD | rs281037    | chr5:155,135,063-156,194,798 | AX-14944018  |
| SGCD | rs139192914 | chr5:155,135,063-156,194,798 | AX-122395384 |
| SGCD | rs281038    | chr5:155,135,063-156,194,798 | AX-35170301  |
| SGCD | rs111884528 | chr5:155,135,063-156,194,798 | AX-14944019  |
| SGCD | rs281039    | chr5:155,135,063-156,194,798 | AX-14944021  |
| SGCD | rs73301172  | chr5:155,135,063-156,194,798 | AX-14944022  |
| SGCD | rs281040    | chr5:155,135,063-156,194,798 | AX-14944023  |
| SGCD | rs281041    | chr5:155,135,063-156,194,798 | AX-14944024  |
| SGCD | rs281042    | chr5:155,135,063-156,194,798 | AX-148231331 |
| SGCD | rs79759527  | chr5:155,135,063-156,194,798 | AX-14944026  |
| SGCD | rs281044    | chr5:155,135,063-156,194,798 | AX-14944027  |
| SGCD | rs73301180  | chr5:155,135,063-156,194,798 | AX-156275751 |
| SGCD | rs73301180  | chr5:155,135,063-156,194,798 | AX-156292859 |
| SGCD | rs77616909  | chr5:155,135,063-156,194,798 | AX-14944030  |
| SGCD | rs281045    | chr5:155,135,063-156,194,798 | AX-14944031  |
| SGCD | rs281046    | chr5:155,135,063-156,194,798 | AX-156292860 |
| SGCD | rs188130    | chr5:155,135,063-156,194,798 | AX-14944033  |
| SGCD | rs147682890 | chr5:155,135,063-156,194,798 | AX-148825385 |
| SGCD | rs147682890 | chr5:155,135,063-156,194,798 | AX-156284139 |
| SGCD | rs199499900 | chr5:155,135,063-156,194,798 | AX-151394911 |
| SGCD | rs199499900 | chr5:155,135,063-156,194,798 | AX-156286248 |
| SGCD | rs157319    | chr5:155,135,063-156,194,798 | AX-148395768 |
| SGCD | rs157319    | chr5:155,135,063-156,194,798 | AX-156275753 |
| SGCD | rs281049    | chr5:155,135,063-156,194,798 | AX-148235991 |
| SGCD | rs281049    | chr5:155,135,063-156,194,798 | AX-156275754 |
| SGCD | rs73301187  | chr5:155,135,063-156,194,798 | AX-148816565 |
| SGCD | rs73301187  | chr5:155,135,063-156,194,798 | AX-156275755 |
| SGCD | rs59915775  | chr5:155,135,063-156,194,798 | AX-35170325  |
| SGCD | rs111309403 | chr5:155,135,063-156,194,798 | AX-14944043  |
| SGCD | rs58622977  | chr5:155,135,063-156,194,798 | AX-35170335  |
| SGCD | rs77271234  | chr5:155,135,063-156,194,798 | AX-14944048  |
| SGCD | rs281053    | chr5:155,135,063-156,194,798 | AX-14944049  |
| SGCD | rs11955617  | chr5:155,135,063-156,194,798 | AX-151423575 |
| SGCD | rs11955617  | chr5:155,135,063-156,194,798 | AX-156275756 |
| SGCD | rs73301193  | chr5:155,135,063-156,194,798 | AX-14944051  |
| SGCD | rs73301195  | chr5:155,135,063-156,194,798 | AX-14944052  |
| SGCD | rs32082     | chr5:155,135,063-156,194,798 | AX-114216071 |
| SGCD | rs7706067   | chr5:155,135,063-156,194,798 | AX-14944054  |
| SGCD | rs111719866 | chr5:155,135,063-156,194,798 | AX-14944056  |
| SGCD | rs113687593 | chr5:155,135,063-156,194,798 | AX-14944059  |
| SGCD | rs41075     | chr5:155,135,063-156,194,798 | AX-14944061  |
| SGCD | rs10056555  | chr5:155,135,063-156,194,798 | AX-156275757 |
| SGCD | rs10056555  | chr5:155,135,063-156,194,798 | AX-156292861 |
| SGCD | rs32080     | chr5:155,135,063-156,194,798 | AX-147852105 |
| SGCD | rs32080     | chr5:155,135,063-156,194,798 | AX-84651646  |
| SGCD | rs116052603 | chr5:155,135,063-156,194,798 | AX-14944066  |
| SGCD | rs11744039  | chr5:155,135,063-156,194,798 | AX-14944067  |

|      |            |                              |              |
|------|------------|------------------------------|--------------|
| SGCD | rs61610409 | chr5:155,135,063-156,194,798 | AX-14944068  |
| SGCD | rs78786340 | chr5:155,135,063-156,194,798 | AX-14944076  |
| SGCD | rs32078    | chr5:155,135,063-156,194,798 | AX-35170353  |
| SGCD | rs32077    | chr5:155,135,063-156,194,798 | AX-14944083  |
| SGCD | rs33912988 | chr5:155,135,063-156,194,798 | AX-119557099 |
| SGCD | rs33912988 | chr5:155,135,063-156,194,798 | AX-156284846 |
| SGCD | rs10071427 | chr5:155,135,063-156,194,798 | AX-35170355  |
| SGCD | rs77014517 | chr5:155,135,063-156,194,798 | AX-14944086  |
| SGCD | rs34853524 | chr5:155,135,063-156,194,798 | AX-41644951  |
| SGCD | rs73302804 | chr5:155,135,063-156,194,798 | AX-14944087  |
| SGCD | rs32076    | chr5:155,135,063-156,194,798 | AX-14944088  |
| SGCD | rs32075    | chr5:155,135,063-156,194,798 | AX-14944089  |
| SGCD | rs73302808 | chr5:155,135,063-156,194,798 | AX-14944090  |
| SGCD | rs32073    | chr5:155,135,063-156,194,798 | AX-156282374 |
| SGCD | rs32073    | chr5:155,135,063-156,194,798 | AX-156297003 |
| SGCD | rs80000754 | chr5:155,135,063-156,194,798 | AX-14944092  |
| SGCD | rs57380802 | chr5:155,135,063-156,194,798 | AX-14944093  |
| SGCD | rs157671   | chr5:155,135,063-156,194,798 | AX-41644957  |
| SGCD | rs73302810 | chr5:155,135,063-156,194,798 | AX-14944097  |
| SGCD | rs157670   | chr5:155,135,063-156,194,798 | AX-14944098  |
| SGCD | rs32072    | chr5:155,135,063-156,194,798 | AX-14944099  |
| SGCD | rs32071    | chr5:155,135,063-156,194,798 | AX-156275758 |
| SGCD | rs32071    | chr5:155,135,063-156,194,798 | AX-156292862 |
| SGCD | rs7723731  | chr5:155,135,063-156,194,798 | AX-12638243  |
| SGCD | rs32070    | chr5:155,135,063-156,194,798 | AX-88899428  |
| SGCD | rs32070    | chr5:155,135,063-156,194,798 | AX-88899429  |
| SGCD | rs32069    | chr5:155,135,063-156,194,798 | AX-156275759 |
| SGCD | rs39927    | chr5:155,135,063-156,194,798 | AX-14944100  |
| SGCD | rs73302817 | chr5:155,135,063-156,194,798 | AX-156275760 |
| SGCD | rs73302817 | chr5:155,135,063-156,194,798 | AX-156292864 |
| SGCD | rs32068    | chr5:155,135,063-156,194,798 | AX-14944102  |
| SGCD | rs157331   | chr5:155,135,063-156,194,798 | AX-41644965  |
| SGCD | rs73302819 | chr5:155,135,063-156,194,798 | AX-14944104  |
| SGCD | rs39926    | chr5:155,135,063-156,194,798 | AX-156275761 |
| SGCD | rs39926    | chr5:155,135,063-156,194,798 | AX-156292865 |
| SGCD | rs73302821 | chr5:155,135,063-156,194,798 | AX-14944105  |
| SGCD | rs17053760 | chr5:155,135,063-156,194,798 | AX-11301540  |
| SGCD | rs10036419 | chr5:155,135,063-156,194,798 | AX-35170375  |
| SGCD | rs157332   | chr5:155,135,063-156,194,798 | AX-113251395 |
| SGCD | rs157332   | chr5:155,135,063-156,194,798 | AX-156275762 |
| SGCD | rs157333   | chr5:155,135,063-156,194,798 | AX-14944109  |
| SGCD | rs157334   | chr5:155,135,063-156,194,798 | AX-14944110  |
| SGCD | rs157335   | chr5:155,135,063-156,194,798 | AX-14944111  |
| SGCD | rs6890150  | chr5:155,135,063-156,194,798 | AX-14944113  |
| SGCD | rs281054   | chr5:155,135,063-156,194,798 | AX-122673920 |
| SGCD | rs281054   | chr5:155,135,063-156,194,798 | AX-148751630 |
| SGCD | rs281055   | chr5:155,135,063-156,194,798 | AX-14944118  |
| SGCD | rs5872479  | chr5:155,135,063-156,194,798 | AX-151398249 |
| SGCD | rs5872479  | chr5:155,135,063-156,194,798 | AX-156297812 |
| SGCD | rs281056   | chr5:155,135,063-156,194,798 | AX-156282375 |
| SGCD | rs281056   | chr5:155,135,063-156,194,798 | AX-156297004 |
| SGCD | rs79211336 | chr5:155,135,063-156,194,798 | AX-156275763 |
| SGCD | rs79211336 | chr5:155,135,063-156,194,798 | AX-156292866 |
| SGCD | rs281057   | chr5:155,135,063-156,194,798 | AX-156292867 |
| SGCD | rs11953043 | chr5:155,135,063-156,194,798 | AX-41644977  |

|      |             |                              |              |
|------|-------------|------------------------------|--------------|
| SGCD | rs281058    | chr5:155,135,063-156,194,798 | AX-14944127  |
| SGCD | rs32095     | chr5:155,135,063-156,194,798 | AX-14944129  |
| SGCD | rs32094     | chr5:155,135,063-156,194,798 | AX-14944130  |
| SGCD | rs10085029  | chr5:155,135,063-156,194,798 | AX-35170391  |
| SGCD | ---         | chr5:155,135,063-156,194,798 | AX-156284140 |
| SGCD | rs39929     | chr5:155,135,063-156,194,798 | AX-156275765 |
| SGCD | rs39929     | chr5:155,135,063-156,194,798 | AX-92438608  |
| SGCD | rs468494    | chr5:155,135,063-156,194,798 | AX-92796838  |
| SGCD | rs467530    | chr5:155,135,063-156,194,798 | AX-151313028 |
| SGCD | rs157664    | chr5:155,135,063-156,194,798 | AX-14944134  |
| SGCD | rs73302831  | chr5:155,135,063-156,194,798 | AX-14944137  |
| SGCD | rs32091     | chr5:155,135,063-156,194,798 | AX-14944139  |
| SGCD | rs32090     | chr5:155,135,063-156,194,798 | AX-14944140  |
| SGCD | rs32089     | chr5:155,135,063-156,194,798 | AX-156275768 |
| SGCD | rs32089     | chr5:155,135,063-156,194,798 | AX-156292868 |
| SGCD | rs61231457  | chr5:155,135,063-156,194,798 | AX-156275769 |
| SGCD | rs61231457  | chr5:155,135,063-156,194,798 | AX-156292869 |
| SGCD | rs73302837  | chr5:155,135,063-156,194,798 | AX-14944143  |
| SGCD | rs32088     | chr5:155,135,063-156,194,798 | AX-14944144  |
| SGCD | rs73302841  | chr5:155,135,063-156,194,798 | AX-35170403  |
| SGCD | rs32087     | chr5:155,135,063-156,194,798 | AX-14944149  |
| SGCD | rs32086     | chr5:155,135,063-156,194,798 | AX-14944150  |
| SGCD | rs144978766 | chr5:155,135,063-156,194,798 | AX-120701150 |
| SGCD | rs144978766 | chr5:155,135,063-156,194,798 | AX-14944151  |
| SGCD | rs80153581  | chr5:155,135,063-156,194,798 | AX-14944153  |
| SGCD | rs75107684  | chr5:155,135,063-156,194,798 | AX-14944154  |
| SGCD | rs39928     | chr5:155,135,063-156,194,798 | AX-11489012  |
| SGCD | rs32085     | chr5:155,135,063-156,194,798 | AX-14944156  |
| SGCD | rs73302848  | chr5:155,135,063-156,194,798 | AX-14944159  |
| SGCD | rs32084     | chr5:155,135,063-156,194,798 | AX-11436994  |
| SGCD | rs32083     | chr5:155,135,063-156,194,798 | AX-12549834  |
| SGCD | rs73302852  | chr5:155,135,063-156,194,798 | AX-14944163  |
| SGCD | rs157336    | chr5:155,135,063-156,194,798 | AX-11276921  |
| SGCD | rs157337    | chr5:155,135,063-156,194,798 | AX-14944167  |
| SGCD | rs17053816  | chr5:155,135,063-156,194,798 | AX-120572950 |
| SGCD | rs17053816  | chr5:155,135,063-156,194,798 | AX-156292870 |
| SGCD | rs157338    | chr5:155,135,063-156,194,798 | AX-156275770 |
| SGCD | rs157339    | chr5:155,135,063-156,194,798 | AX-14944168  |
| SGCD | rs157340    | chr5:155,135,063-156,194,798 | AX-156275771 |
| SGCD | rs281060    | chr5:155,135,063-156,194,798 | AX-14944171  |
| SGCD | rs75252927  | chr5:155,135,063-156,194,798 | AX-14944173  |
| SGCD | rs116174051 | chr5:155,135,063-156,194,798 | AX-14944174  |
| SGCD | rs157341    | chr5:155,135,063-156,194,798 | AX-14944176  |
| SGCD | rs157342    | chr5:155,135,063-156,194,798 | AX-41645001  |
| SGCD | rs157343    | chr5:155,135,063-156,194,798 | AX-41645005  |
| SGCD | rs17053824  | chr5:155,135,063-156,194,798 | AX-41645007  |
| SGCD | rs157344    | chr5:155,135,063-156,194,798 | AX-156275772 |
| SGCD | rs157345    | chr5:155,135,063-156,194,798 | AX-156275773 |
| SGCD | rs157345    | chr5:155,135,063-156,194,798 | AX-156292873 |
| SGCD | rs141243873 | chr5:155,135,063-156,194,798 | AX-151433200 |
| SGCD | rs141243873 | chr5:155,135,063-156,194,798 | AX-156284936 |
| SGCD | rs157346    | chr5:155,135,063-156,194,798 | AX-41645013  |
| SGCD | rs10706643  | chr5:155,135,063-156,194,798 | AX-156282376 |
| SGCD | rs157347    | chr5:155,135,063-156,194,798 | AX-41645017  |
| SGCD | rs157348    | chr5:155,135,063-156,194,798 | AX-14944183  |

|      |             |                              |              |
|------|-------------|------------------------------|--------------|
| SGCD | rs76116452  | chr5:155,135,063-156,194,798 | AX-35170423  |
| SGCD | rs157349    | chr5:155,135,063-156,194,798 | AX-14944185  |
| SGCD | rs139685817 | chr5:155,135,063-156,194,798 | AX-151420497 |
| SGCD | rs139685817 | chr5:155,135,063-156,194,798 | AX-156284779 |
| SGCD | rs73302871  | chr5:155,135,063-156,194,798 | AX-14944188  |
| SGCD | rs157350    | chr5:155,135,063-156,194,798 | AX-14944189  |
| SGCD | rs153843    | chr5:155,135,063-156,194,798 | AX-14944190  |
| SGCD | rs157351    | chr5:155,135,063-156,194,798 | AX-35170427  |
| SGCD | rs467770    | chr5:155,135,063-156,194,798 | AX-113251396 |
| SGCD | rs157352    | chr5:155,135,063-156,194,798 | AX-14944196  |
| SGCD | rs157353    | chr5:155,135,063-156,194,798 | AX-114216074 |
| SGCD | rs157354    | chr5:155,135,063-156,194,798 | AX-14944198  |
| SGCD | rs10515741  | chr5:155,135,063-156,194,798 | AX-11114994  |
| SGCD | rs282474    | chr5:155,135,063-156,194,798 | AX-11412866  |
| SGCD | rs116302240 | chr5:155,135,063-156,194,798 | AX-35170437  |
| SGCD | rs73302881  | chr5:155,135,063-156,194,798 | AX-14944199  |
| SGCD | rs78302942  | chr5:155,135,063-156,194,798 | AX-14944201  |
| SGCD | rs17561376  | chr5:155,135,063-156,194,798 | AX-12501187  |
| SGCD | rs80065492  | chr5:155,135,063-156,194,798 | AX-14944204  |
| SGCD | rs114680992 | chr5:155,135,063-156,194,798 | AX-14944205  |
| SGCD | rs72803018  | chr5:155,135,063-156,194,798 | AX-156275775 |
| SGCD | rs157676    | chr5:155,135,063-156,194,798 | AX-41645025  |
| SGCD | rs72803019  | chr5:155,135,063-156,194,798 | AX-14944209  |
| SGCD | rs157677    | chr5:155,135,063-156,194,798 | AX-14944210  |
| SGCD | rs11749404  | chr5:155,135,063-156,194,798 | AX-14944211  |
| SGCD | rs157678    | chr5:155,135,063-156,194,798 | AX-123095361 |
| SGCD | rs75317960  | chr5:155,135,063-156,194,798 | AX-156275776 |
| SGCD | rs75317960  | chr5:155,135,063-156,194,798 | AX-156292876 |
| SGCD | rs116148515 | chr5:155,135,063-156,194,798 | AX-148612785 |
| SGCD | rs116148515 | chr5:155,135,063-156,194,798 | AX-156275777 |
| SGCD | rs11948514  | chr5:155,135,063-156,194,798 | AX-148464293 |
| SGCD | rs11948514  | chr5:155,135,063-156,194,798 | AX-156275778 |
| SGCD | rs149131739 | chr5:155,135,063-156,194,798 | AX-156285478 |
| SGCD | rs157488    | chr5:155,135,063-156,194,798 | AX-156275779 |
| SGCD | rs282475    | chr5:155,135,063-156,194,798 | AX-114328035 |
| SGCD | rs282475    | chr5:155,135,063-156,194,798 | AX-123105193 |
| SGCD | rs73302892  | chr5:155,135,063-156,194,798 | AX-14944214  |
| SGCD | rs282465    | chr5:155,135,063-156,194,798 | AX-12538811  |
| SGCD | rs157679    | chr5:155,135,063-156,194,798 | AX-12470382  |
| SGCD | rs157680    | chr5:155,135,063-156,194,798 | AX-156282377 |
| SGCD | rs157680    | chr5:155,135,063-156,194,798 | AX-156297005 |
| SGCD | rs17053833  | chr5:155,135,063-156,194,798 | AX-12487926  |
| SGCD | rs79857689  | chr5:155,135,063-156,194,798 | AX-38254501  |
| SGCD | rs73302901  | chr5:155,135,063-156,194,798 | AX-156292877 |
| SGCD | rs17053838  | chr5:155,135,063-156,194,798 | AX-41645037  |
| SGCD | rs67453120  | chr5:155,135,063-156,194,798 | AX-14944222  |
| SGCD | rs459055    | chr5:155,135,063-156,194,798 | AX-12575369  |
| SGCD | rs17053847  | chr5:155,135,063-156,194,798 | AX-14944228  |
| SGCD | rs2642660   | chr5:155,135,063-156,194,798 | AX-41645045  |
| SGCD | rs67059134  | chr5:155,135,063-156,194,798 | AX-14944229  |
| SGCD | rs73304909  | chr5:155,135,063-156,194,798 | AX-35170463  |
| SGCD | rs282466    | chr5:155,135,063-156,194,798 | AX-11412842  |
| SGCD | rs2652324   | chr5:155,135,063-156,194,798 | AX-14944230  |
| SGCD | rs466781    | chr5:155,135,063-156,194,798 | AX-14944233  |
| SGCD | rs463728    | chr5:155,135,063-156,194,798 | AX-35170469  |

|      |             |                              |              |
|------|-------------|------------------------------|--------------|
| SGCD | rs72803027  | chr5:155,135,063-156,194,798 | AX-156275781 |
| SGCD | rs17053865  | chr5:155,135,063-156,194,798 | AX-14944234  |
| SGCD | rs35575932  | chr5:155,135,063-156,194,798 | AX-14944235  |
| SGCD | rs113473126 | chr5:155,135,063-156,194,798 | AX-156275782 |
| SGCD | rs462058    | chr5:155,135,063-156,194,798 | AX-14944236  |
| SGCD | rs456290    | chr5:155,135,063-156,194,798 | AX-12574816  |
| SGCD | rs73304925  | chr5:155,135,063-156,194,798 | AX-14944237  |
| SGCD | rs72803029  | chr5:155,135,063-156,194,798 | AX-151336233 |
| SGCD | ---         | chr5:155,135,063-156,194,798 | AX-14944238  |
| SGCD | rs10515742  | chr5:155,135,063-156,194,798 | AX-14944239  |
| SGCD | rs10515743  | chr5:155,135,063-156,194,798 | AX-14944241  |
| SGCD | rs284443    | chr5:155,135,063-156,194,798 | AX-123059551 |
| SGCD | rs284443    | chr5:155,135,063-156,194,798 | AX-123059552 |
| SGCD | rs284444    | chr5:155,135,063-156,194,798 | AX-14944242  |
| SGCD | rs112812694 | chr5:155,135,063-156,194,798 | AX-14944244  |
| SGCD | rs283098    | chr5:155,135,063-156,194,798 | AX-14944245  |
| SGCD | rs55667497  | chr5:155,135,063-156,194,798 | AX-148604404 |
| SGCD | rs55667497  | chr5:155,135,063-156,194,798 | AX-156282378 |
| SGCD | rs11949511  | chr5:155,135,063-156,194,798 | AX-156282379 |
| SGCD | rs11949511  | chr5:155,135,063-156,194,798 | AX-156297006 |
| SGCD | rs76691977  | chr5:155,135,063-156,194,798 | AX-156275784 |
| SGCD | rs76691977  | chr5:155,135,063-156,194,798 | AX-156292880 |
| SGCD | rs17053873  | chr5:155,135,063-156,194,798 | AX-12487931  |
| SGCD | rs141400817 | chr5:155,135,063-156,194,798 | AX-151408710 |
| SGCD | rs141400817 | chr5:155,135,063-156,194,798 | AX-156298309 |
| SGCD | rs62382382  | chr5:155,135,063-156,194,798 | AX-14944256  |
| SGCD | rs464992    | chr5:155,135,063-156,194,798 | AX-11515129  |
| SGCD | rs61663045  | chr5:155,135,063-156,194,798 | AX-14944257  |
| SGCD | rs284442    | chr5:155,135,063-156,194,798 | AX-11417102  |
| SGCD | rs72803033  | chr5:155,135,063-156,194,798 | AX-14944259  |
| SGCD | rs172240    | chr5:155,135,063-156,194,798 | AX-95859937  |
| SGCD | rs10515744  | chr5:155,135,063-156,194,798 | AX-14944262  |
| SGCD | rs284441    | chr5:155,135,063-156,194,798 | AX-14944263  |
| SGCD | rs61495230  | chr5:155,135,063-156,194,798 | AX-35170495  |
| SGCD | rs11955986  | chr5:155,135,063-156,194,798 | AX-14944267  |
| SGCD | rs5872483   | chr5:155,135,063-156,194,798 | AX-12591354  |
| SGCD | rs73304939  | chr5:155,135,063-156,194,798 | AX-14944269  |
| SGCD | rs284440    | chr5:155,135,063-156,194,798 | AX-11394897  |
| SGCD | rs10515745  | chr5:155,135,063-156,194,798 | AX-14944270  |
| SGCD | rs284439    | chr5:155,135,063-156,194,798 | AX-14944273  |
| SGCD | rs59605435  | chr5:155,135,063-156,194,798 | AX-156275785 |
| SGCD | rs59605435  | chr5:155,135,063-156,194,798 | AX-156292881 |
| SGCD | rs3969608   | chr5:155,135,063-156,194,798 | AX-156275786 |
| SGCD | rs57805501  | chr5:155,135,063-156,194,798 | AX-151382040 |
| SGCD | rs57805501  | chr5:155,135,063-156,194,798 | AX-156284786 |
| SGCD | rs150518478 | chr5:155,135,063-156,194,798 | AX-121641265 |
| SGCD | rs73304945  | chr5:155,135,063-156,194,798 | AX-14944276  |
| SGCD | rs201553093 | chr5:155,135,063-156,194,798 | AX-121800053 |
| SGCD | rs201553093 | chr5:155,135,063-156,194,798 | AX-156286407 |
| SGCD | rs66744889  | chr5:155,135,063-156,194,798 | AX-14944279  |
| SGCD | rs56297325  | chr5:155,135,063-156,194,798 | AX-14944283  |
| SGCD | rs151071457 | chr5:155,135,063-156,194,798 | AX-156286370 |
| SGCD | rs113570565 | chr5:155,135,063-156,194,798 | AX-151274314 |
| SGCD | rs113570565 | chr5:155,135,063-156,194,798 | AX-156297789 |
| SGCD | rs10050975  | chr5:155,135,063-156,194,798 | AX-122534326 |

|       |             |                              |              |
|-------|-------------|------------------------------|--------------|
| SGCD  | rs10050975  | chr5:155,135,063-156,194,798 | AX-151324842 |
| SGCD  | rs59428757  | chr5:155,135,063-156,194,798 | AX-148406279 |
| SGCD  | rs59428757  | chr5:155,135,063-156,194,798 | AX-156275787 |
| SGCD  | rs3857411   | chr5:155,135,063-156,194,798 | AX-14944296  |
| SGCD  | rs961272    | chr5:155,135,063-156,194,798 | AX-41645065  |
| SGCD  | rs3898659   | chr5:155,135,063-156,194,798 | AX-156275788 |
| SGCD  | rs3898659   | chr5:155,135,063-156,194,798 | AX-156292883 |
| SGCD  | rs73304951  | chr5:155,135,063-156,194,798 | AX-156275789 |
| SGCD  | rs73304951  | chr5:155,135,063-156,194,798 | AX-156292884 |
| SGCD  | rs11135380  | chr5:155,135,063-156,194,798 | AX-14944298  |
| SGCD  | rs11135381  | chr5:155,135,063-156,194,798 | AX-14944299  |
| SGCD  | rs11135382  | chr5:155,135,063-156,194,798 | AX-14944300  |
| SGCD  | rs11135383  | chr5:155,135,063-156,194,798 | AX-156275790 |
| SGCD  | rs11135383  | chr5:155,135,063-156,194,798 | AX-156292885 |
| SGCD  | rs57838784  | chr5:155,135,063-156,194,798 | AX-14944301  |
| SGCD  | rs57452961  | chr5:155,135,063-156,194,798 | AX-14944302  |
| SGCD  | rs57399099  | chr5:155,135,063-156,194,798 | AX-14944303  |
| SGCD  | rs71723387  | chr5:155,135,063-156,194,798 | AX-156285564 |
| SGCD  | rs12110214  | chr5:155,135,063-156,194,798 | AX-14944307  |
| SGCD  | rs3215118   | chr5:155,135,063-156,194,798 | AX-88767570  |
| SGCD  | rs3215118   | chr5:155,135,063-156,194,798 | AX-88810615  |
| SGCD  | ---         | chr5:155,135,063-156,194,798 | AX-90030721  |
| SGCD  | rs145887064 | chr5:155,135,063-156,194,798 | AX-151315117 |
| SGCD  | rs145887064 | chr5:155,135,063-156,194,798 | AX-156284602 |
| SGCD  | rs1494542   | chr5:155,135,063-156,194,798 | AX-14944312  |
| SGCD  | rs3913020   | chr5:155,135,063-156,194,798 | AX-156275791 |
| SGCD  | rs3913020   | chr5:155,135,063-156,194,798 | AX-156292886 |
| SGCD  | rs72803039  | chr5:155,135,063-156,194,798 | AX-14944314  |
| SGCD  | rs72803040  | chr5:155,135,063-156,194,798 | AX-14944317  |
| SGCD  | rs6886827   | chr5:155,135,063-156,194,798 | AX-12613182  |
| SGCD  | rs3857412   | chr5:155,135,063-156,194,798 | AX-14944318  |
| SGCD  | rs72803041  | chr5:155,135,063-156,194,798 | AX-14944319  |
| SGCD  | rs284445    | chr5:155,135,063-156,194,798 | AX-14944320  |
| SGCD  | rs1389818   | chr5:155,135,063-156,194,798 | AX-11259029  |
| SGCD  | rs72803042  | chr5:155,135,063-156,194,798 | AX-14944322  |
| SGCD  | rs56293630  | chr5:155,135,063-156,194,798 | AX-14944323  |
| SGCD  | rs72803043  | chr5:155,135,063-156,194,798 | AX-14944324  |
| SGCD  | rs72803044  | chr5:155,135,063-156,194,798 | AX-14944325  |
| SGCD  | rs72803046  | chr5:155,135,063-156,194,798 | AX-14944326  |
| SGCD  | rs3842051   | chr5:155,135,063-156,194,798 | AX-11484201  |
| SGCD  | rs3842051   | chr5:155,135,063-156,194,798 | AX-156284590 |
| SGCD  | rs56182215  | chr5:155,135,063-156,194,798 | AX-14944328  |
| SGCD  | rs56389540  | chr5:155,135,063-156,194,798 | AX-35170537  |
| SGCD  | rs55653598  | chr5:155,135,063-156,194,798 | AX-14944331  |
| SGCD  | rs73304958  | chr5:155,135,063-156,194,798 | AX-14944333  |
| SGCD  | rs1845479   | chr5:155,135,063-156,194,798 | AX-11346701  |
| SGCD  | rs3913482   | chr5:155,135,063-156,194,798 | AX-11487282  |
| SGCD  | rs11953631  | chr5:155,135,063-156,194,798 | AX-14944335  |
| SGCD  | rs72803047  | chr5:155,135,063-156,194,798 | AX-14944337  |
| SGCD  | rs61633788  | chr5:155,135,063-156,194,798 | AX-14944338  |
| SGCD  | rs1827368   | chr5:155,135,063-156,194,798 | AX-12507016  |
| SGCD  | rs72803048  | chr5:155,135,063-156,194,798 | AX-14944340  |
| SGCD  | rs56233900  | chr5:155,135,063-156,194,798 | AX-14944342  |
| SNTA1 | ---         | chr20:31,995,763-32,031,698  | AX-32916179  |
| SNTA1 | rs56157422  | chr20:31,995,763-32,031,698  | AX-83446209  |

|       |             |                              |             |
|-------|-------------|------------------------------|-------------|
| SNTA1 | rs657040    | chr20:31,995,763-32,031,698  | AX-40529419 |
| TAZ   | ---         | chrX:153,639,877-153,650,063 | AX-90080648 |
| TAZ   | ---         | chrX:153,639,877-153,650,063 | AX-90058641 |
| TAZ   | ---         | chrX:153,639,877-153,650,063 | AX-90035485 |
| TAZ   | ---         | chrX:153,639,877-153,650,063 | AX-37208805 |
| TAZ   | ---         | chrX:153,639,877-153,650,063 | AX-90060737 |
| TAZ   | ---         | chrX:153,639,877-153,650,063 | AX-90062427 |
| TAZ   | ---         | chrX:153,639,877-153,650,063 | AX-90077480 |
| TAZ   | ---         | chrX:153,639,877-153,650,063 | AX-90056031 |
| TAZ   | ---         | chrX:153,639,877-153,650,063 | AX-90050486 |
| TAZ   | ---         | chrX:153,639,877-153,650,063 | AX-90057035 |
| TAZ   | rs104894941 | chrX:153,639,877-153,650,063 | AX-88800921 |
| TAZ   | ---         | chrX:153,639,877-153,650,063 | AX-90077214 |
| TAZ   | ---         | chrX:153,639,877-153,650,063 | AX-90033191 |
| TAZ   | ---         | chrX:153,639,877-153,650,063 | AX-90057793 |
| TAZ   | ---         | chrX:153,639,877-153,650,063 | AX-90054566 |
| TAZ   | ---         | chrX:153,639,877-153,650,063 | AX-90060595 |
| TAZ   | ---         | chrX:153,639,877-153,650,063 | AX-90025682 |
| TAZ   | ---         | chrX:153,639,877-153,650,063 | AX-90031622 |
| TAZ   | ---         | chrX:153,639,877-153,650,063 | AX-90025683 |
| TAZ   | ---         | chrX:153,639,877-153,650,063 | AX-90031746 |
| TAZ   | ---         | chrX:153,639,877-153,650,063 | AX-90037431 |
| TAZ   | ---         | chrX:153,639,877-153,650,063 | AX-90027739 |
| TAZ   | ---         | chrX:153,639,877-153,650,063 | AX-90043914 |
| TAZ   | ---         | chrX:153,639,877-153,650,063 | AX-90025684 |
| TAZ   | rs104894942 | chrX:153,639,877-153,650,063 | AX-88757877 |
| TAZ   | ---         | chrX:153,639,877-153,650,063 | AX-90062816 |
| TAZ   | ---         | chrX:153,639,877-153,650,063 | AX-90025685 |
| TAZ   | ---         | chrX:153,639,877-153,650,063 | AX-90060006 |
| TAZ   | ---         | chrX:153,639,877-153,650,063 | AX-90066262 |
| TAZ   | ---         | chrX:153,639,877-153,650,063 | AX-90048971 |
| TAZ   | rs397515739 | chrX:153,639,877-153,650,063 | AX-90035660 |
| TAZ   | ---         | chrX:153,639,877-153,650,063 | AX-90035538 |
| TAZ   | ---         | chrX:153,639,877-153,650,063 | AX-90057452 |
| TAZ   | rs104894937 | chrX:153,639,877-153,650,063 | AX-90071408 |
| TAZ   | ---         | chrX:153,639,877-153,650,063 | AX-90054572 |
| TAZ   | ---         | chrX:153,639,877-153,650,063 | AX-90058513 |
| TAZ   | ---         | chrX:153,639,877-153,650,063 | AX-90056579 |
| TAZ   | ---         | chrX:153,639,877-153,650,063 | AX-90035440 |
| TAZ   | ---         | chrX:153,639,877-153,650,063 | AX-90063903 |
| TAZ   | ---         | chrX:153,639,877-153,650,063 | AX-90074563 |
| TAZ   | ---         | chrX:153,639,877-153,650,063 | AX-90025688 |
| TAZ   | ---         | chrX:153,639,877-153,650,063 | AX-90048634 |
| TAZ   | ---         | chrX:153,639,877-153,650,063 | AX-90031378 |
| TAZ   | ---         | chrX:153,639,877-153,650,063 | AX-90080527 |
| TAZ   | ---         | chrX:153,639,877-153,650,063 | AX-90025689 |
| TAZ   | ---         | chrX:153,639,877-153,650,063 | AX-90025690 |
| TAZ   | ---         | chrX:153,639,877-153,650,063 | AX-90048436 |
| TAZ   | ---         | chrX:153,639,877-153,650,063 | AX-90059147 |
| TAZ   | ---         | chrX:153,639,877-153,650,063 | AX-90032769 |
| TAZ   | rs132630277 | chrX:153,639,877-153,650,063 | AX-88801113 |
| TAZ   | rs397515746 | chrX:153,639,877-153,650,063 | AX-90054576 |
| TAZ   | ---         | chrX:153,639,877-153,650,063 | AX-90049557 |
| TAZ   | ---         | chrX:153,639,877-153,650,063 | AX-90079420 |
| TAZ   | ---         | chrX:153,639,877-153,650,063 | AX-90025692 |



|        |             |                              |              |
|--------|-------------|------------------------------|--------------|
| TAZ    | ---         | chrX:153,639,877-153,650,063 | AX-90025693  |
| TAZ    | ---         | chrX:153,639,877-153,650,063 | AX-90061897  |
| TAZ    | ---         | chrX:153,639,877-153,650,063 | AX-90036553  |
| TAZ    | ---         | chrX:153,639,877-153,650,063 | AX-90079674  |
| TAZ    | ---         | chrX:153,639,877-153,650,063 | AX-90072296  |
| TAZ    | ---         | chrX:153,639,877-153,650,063 | AX-90054581  |
| TAZ    | ---         | chrX:153,639,877-153,650,063 | AX-90080591  |
| TAZ    | ---         | chrX:153,639,877-153,650,063 | AX-90060565  |
| TAZ    | ---         | chrX:153,639,877-153,650,063 | AX-90027062  |
| TAZ    | ---         | chrX:153,639,877-153,650,063 | AX-90027865  |
| TAZ    | ---         | chrX:153,639,877-153,650,063 | AX-90062039  |
| TAZ    | rs397515750 | chrX:153,639,877-153,650,063 | AX-90057350  |
| TAZ    | ---         | chrX:153,639,877-153,650,063 | AX-90071764  |
| TAZ    | ---         | chrX:153,639,877-153,650,063 | AX-90074064  |
| TCAP   | rs45495192  | chr17:37,821,599-37,822,807  | AX-83517234  |
| TCAP   | ---         | chr17:37,821,599-37,822,807  | AX-90027554  |
| TCAP   | ---         | chr17:37,821,599-37,822,807  | AX-90052504  |
| TCAP   | rs104894655 | chr17:37,821,599-37,822,807  | AX-90041219  |
| TCAP   | ---         | chr17:37,821,599-37,822,807  | AX-90031033  |
| TCAP   | rs45578741  | chr17:37,821,599-37,822,807  | AX-83038041  |
| TCAP   | ---         | chr17:37,821,599-37,822,807  | AX-90060581  |
| TCAP   | ---         | chr17:37,821,599-37,822,807  | AX-90026759  |
| TCAP   | rs1053651   | chr17:37,821,599-37,822,807  | AX-40175283  |
| TMEM43 | rs2733584   | chr3:14,166,440-14,185,180   | AX-41124411  |
| TMEM43 | rs34099410  | chr3:14,166,440-14,185,180   | AX-83457763  |
| TMEM43 | rs145619906 | chr3:14,166,440-14,185,180   | AX-82967020  |
| TMEM43 | rs4685076   | chr3:14,166,440-14,185,180   | AX-41124499  |
| TMEM43 | rs2340917   | chr3:14,166,440-14,185,180   | AX-11385825  |
| TMEM43 | rs6766740   | chr3:14,166,440-14,185,180   | AX-41124531  |
| TMEM43 | rs113449357 | chr3:14,166,440-14,185,180   | AX-83556072  |
| TMEM43 | rs11943     | chr3:14,166,440-14,185,180   | AX-34081005  |
| TMEM43 | rs1043953   | chr3:14,166,440-14,185,180   | AX-41124725  |
| TMPO   | rs190115355 | chr12:98,909,351-98,944,157  | AX-156288775 |
| TMPO   | rs190115355 | chr12:98,909,351-98,944,157  | AX-84963193  |
| TMPO   | rs200177466 | chr12:98,909,351-98,944,157  | AX-83300229  |
| TMPO   | rs249825    | chr12:98,909,351-98,944,157  | AX-39536843  |
| TMPO   | rs11829793  | chr12:98,909,351-98,944,157  | AX-120002470 |
| TMPO   | rs11829793  | chr12:98,909,351-98,944,157  | AX-156266442 |
| TMPO   | rs11109509  | chr12:98,909,351-98,944,157  | AX-17087735  |
| TMPO   | rs11109510  | chr12:98,909,351-98,944,157  | AX-30949425  |
| TMPO   | rs73136485  | chr12:98,909,351-98,944,157  | AX-30949427  |
| TMPO   | rs113882661 | chr12:98,909,351-98,944,157  | AX-123075025 |
| TMPO   | rs113882661 | chr12:98,909,351-98,944,157  | AX-123075026 |
| TMPO   | rs111966040 | chr12:98,909,351-98,944,157  | AX-151268127 |
| TMPO   | rs111966040 | chr12:98,909,351-98,944,157  | AX-153464093 |
| TMPO   | rs4394881   | chr12:98,909,351-98,944,157  | AX-156266443 |
| TMPO   | rs4394881   | chr12:98,909,351-98,944,157  | AX-156286955 |
| TMPO   | rs1420446   | chr12:98,909,351-98,944,157  | AX-39536849  |
| TMPO   | rs35183227  | chr12:98,909,351-98,944,157  | AX-151358810 |
| TMPO   | rs113822789 | chr12:98,909,351-98,944,157  | AX-94348268  |
| TMPO   | rs73136486  | chr12:98,909,351-98,944,157  | AX-151306777 |
| TMPO   | rs73136486  | chr12:98,909,351-98,944,157  | AX-156280224 |
| TMPO   | rs111441521 | chr12:98,909,351-98,944,157  | AX-148521570 |
| TMPO   | rs7135186   | chr12:98,909,351-98,944,157  | AX-119722104 |
| TMPO   | rs7135937   | chr12:98,909,351-98,944,157  | AX-148041185 |

|      |             |                             |              |
|------|-------------|-----------------------------|--------------|
| TMPO | rs7135937   | chr12:98,909,351-98,944,157 | AX-156271274 |
| TMPO | rs142925974 | chr12:98,909,351-98,944,157 | AX-106803762 |
| TMPO | rs142925974 | chr12:98,909,351-98,944,157 | AX-156285544 |
| TMPO | rs7309364   | chr12:98,909,351-98,944,157 | AX-148068876 |
| TMPO | rs7309364   | chr12:98,909,351-98,944,157 | AX-156271275 |
| TMPO | rs77639919  | chr12:98,909,351-98,944,157 | AX-148659810 |
| TMPO | rs77639919  | chr12:98,909,351-98,944,157 | AX-156266444 |
| TMPO | rs12581633  | chr12:98,909,351-98,944,157 | AX-156266445 |
| TMPO | rs12581633  | chr12:98,909,351-98,944,157 | AX-156286956 |
| TMPO | rs11109512  | chr12:98,909,351-98,944,157 | AX-39536853  |
| TMPO | rs11109513  | chr12:98,909,351-98,944,157 | AX-148522679 |
| TMPO | rs7973270   | chr12:98,909,351-98,944,157 | AX-151116247 |
| TMPO | rs7973270   | chr12:98,909,351-98,944,157 | AX-156266446 |
| TMPO | rs11837732  | chr12:98,909,351-98,944,157 | AX-156266447 |
| TMPO | rs11837732  | chr12:98,909,351-98,944,157 | AX-156286957 |
| TMPO | rs11109515  | chr12:98,909,351-98,944,157 | AX-156266448 |
| TMPO | rs78830853  | chr12:98,909,351-98,944,157 | AX-30949467  |
| TMPO | rs73382588  | chr12:98,909,351-98,944,157 | AX-156266449 |
| TMPO | rs7316636   | chr12:98,909,351-98,944,157 | AX-30949471  |
| TMPO | rs12366275  | chr12:98,909,351-98,944,157 | AX-156266450 |
| TMPO | rs12366275  | chr12:98,909,351-98,944,157 | AX-156286959 |
| TMPO | rs11109516  | chr12:98,909,351-98,944,157 | AX-148522691 |
| TMPO | rs11109516  | chr12:98,909,351-98,944,157 | AX-156280225 |
| TMPO | rs199946287 | chr12:98,909,351-98,944,157 | AX-156285861 |
| TMPO | rs10651296  | chr12:98,909,351-98,944,157 | AX-156284959 |
| TMPO | rs7135956   | chr12:98,909,351-98,944,157 | AX-156280226 |
| TMPO | rs7135956   | chr12:98,909,351-98,944,157 | AX-156295694 |
| TMPO | rs12311323  | chr12:98,909,351-98,944,157 | AX-30949475  |
| TMPO | rs7136406   | chr12:98,909,351-98,944,157 | AX-39536861  |
| TMPO | rs35124796  | chr12:98,909,351-98,944,157 | AX-30949479  |
| TMPO | rs11109517  | chr12:98,909,351-98,944,157 | AX-39536863  |
| TMPO | rs111529998 | chr12:98,909,351-98,944,157 | AX-96968419  |
| TMPO | rs10860339  | chr12:98,909,351-98,944,157 | AX-148007731 |
| TMPO | rs10860339  | chr12:98,909,351-98,944,157 | AX-92722887  |
| TMPO | rs7961024   | chr12:98,909,351-98,944,157 | AX-156280227 |
| TMPO | rs7961024   | chr12:98,909,351-98,944,157 | AX-156295695 |
| TMPO | rs35207802  | chr12:98,909,351-98,944,157 | AX-39536871  |
| TMPO | rs36047490  | chr12:98,909,351-98,944,157 | AX-107770729 |
| TMPO | rs36047490  | chr12:98,909,351-98,944,157 | AX-156280228 |
| TMPO | rs7307828   | chr12:98,909,351-98,944,157 | AX-148441054 |
| TMPO | rs7307828   | chr12:98,909,351-98,944,157 | AX-156266451 |
| TMPO | rs112315612 | chr12:98,909,351-98,944,157 | AX-113732041 |
| TMPO | rs61934004  | chr12:98,909,351-98,944,157 | AX-148042748 |
| TMPO | rs61934004  | chr12:98,909,351-98,944,157 | AX-156266452 |
| TMPO | rs3213901   | chr12:98,909,351-98,944,157 | AX-17087754  |
| TMPO | rs3213900   | chr12:98,909,351-98,944,157 | AX-11437202  |
| TMPO | rs146054750 | chr12:98,909,351-98,944,157 | AX-156298312 |
| TMPO | rs73384409  | chr12:98,909,351-98,944,157 | AX-156266453 |
| TMPO | rs138790561 | chr12:98,909,351-98,944,157 | AX-82961280  |
| TMPO | rs139700737 | chr12:98,909,351-98,944,157 | AX-83370903  |
| TMPO | rs35969221  | chr12:98,909,351-98,944,157 | AX-17087756  |
| TMPO | rs141443652 | chr12:98,909,351-98,944,157 | AX-83282388  |
| TMPO | rs17459334  | chr12:98,909,351-98,944,157 | AX-17087759  |
| TMPO | ---         | chr12:98,909,351-98,944,157 | AX-86584595  |
| TMPO | rs17028450  | chr12:98,909,351-98,944,157 | AX-12486157  |

|       |             |                             |              |
|-------|-------------|-----------------------------|--------------|
| TMPO  | rs11109520  | chr12:98,909,351-98,944,157 | AX-17087762  |
| TMPO  | rs17028456  | chr12:98,909,351-98,944,157 | AX-11299234  |
| TMPO  | rs11109521  | chr12:98,909,351-98,944,157 | AX-156266454 |
| TMPO  | rs11109521  | chr12:98,909,351-98,944,157 | AX-156286961 |
| TMPO  | rs11109522  | chr12:98,909,351-98,944,157 | AX-39536885  |
| TMPO  | rs34646198  | chr12:98,909,351-98,944,157 | AX-39536887  |
| TMPO  | rs12825374  | chr12:98,909,351-98,944,157 | AX-30949525  |
| TMPO  | rs140195963 | chr12:98,909,351-98,944,157 | AX-151448437 |
| TMPO  | rs140195963 | chr12:98,909,351-98,944,157 | AX-156285430 |
| TMPO  | rs11109523  | chr12:98,909,351-98,944,157 | AX-148524396 |
| TMPO  | rs11109523  | chr12:98,909,351-98,944,157 | AX-156266455 |
| TMPO  | rs36011276  | chr12:98,909,351-98,944,157 | AX-156286962 |
| TMPO  | rs4762494   | chr12:98,909,351-98,944,157 | AX-17087771  |
| TMPO  | rs4762495   | chr12:98,909,351-98,944,157 | AX-39536891  |
| TMPO  | rs4762496   | chr12:98,909,351-98,944,157 | AX-113551869 |
| TMPO  | rs4762496   | chr12:98,909,351-98,944,157 | AX-148522965 |
| TMPO  | rs58209561  | chr12:98,909,351-98,944,157 | AX-121432003 |
| TMPO  | rs149584406 | chr12:98,909,351-98,944,157 | AX-148264832 |
| TMPO  | rs149584406 | chr12:98,909,351-98,944,157 | AX-148752147 |
| TMPO  | rs12810190  | chr12:98,909,351-98,944,157 | AX-151295614 |
| TMPO  | rs12810190  | chr12:98,909,351-98,944,157 | AX-156269294 |
| TMPO  | rs10860341  | chr12:98,909,351-98,944,157 | AX-39536893  |
| TMPO  | rs7133258   | chr12:98,909,351-98,944,157 | AX-39536895  |
| TMPO  | rs200199961 | chr12:98,909,351-98,944,157 | AX-156285822 |
| TMPO  | rs201498123 | chr12:98,909,351-98,944,157 | AX-156286140 |
| TMPO  | rs2068060   | chr12:98,909,351-98,944,157 | AX-156266457 |
| TMPO  | rs2068060   | chr12:98,909,351-98,944,157 | AX-156286963 |
| TMPO  | rs11109524  | chr12:98,909,351-98,944,157 | AX-39536899  |
| TMPO  | rs60808759  | chr12:98,909,351-98,944,157 | AX-156266458 |
| TMPO  | rs34449077  | chr12:98,909,351-98,944,157 | AX-82939267  |
| TMPO  | rs4762208   | chr12:98,909,351-98,944,157 | AX-156266460 |
| TMPO  | rs10542097  | chr12:98,909,351-98,944,157 | AX-122370332 |
| TMPO  | rs10542097  | chr12:98,909,351-98,944,157 | AX-156297953 |
| TMPO  | rs114805943 | chr12:98,909,351-98,944,157 | AX-156266461 |
| TMPO  | rs10860342  | chr12:98,909,351-98,944,157 | AX-39536903  |
| TMPO  | rs28535939  | chr12:98,909,351-98,944,157 | AX-105094854 |
| TMPO  | rs28535939  | chr12:98,909,351-98,944,157 | AX-148037348 |
| TMPO  | rs147137090 | chr12:98,909,351-98,944,157 | AX-156269295 |
| TMPO  | rs112838469 | chr12:98,909,351-98,944,157 | AX-148446041 |
| TMPO  | rs112838469 | chr12:98,909,351-98,944,157 | AX-156266462 |
| TMPO  | ---         | chr12:98,909,351-98,944,157 | AX-17087781  |
| TNNC1 | rs104893823 | chr3:52,485,107-52,488,057  | AX-90070849  |
| TNNC1 | rs267607124 | chr3:52,485,107-52,488,057  | AX-86578678  |
| TNNC1 | ---         | chr3:52,485,107-52,488,057  | AX-90058541  |
| TNNC1 | rs267607126 | chr3:52,485,107-52,488,057  | AX-90026978  |
| TNNC1 | ---         | chr3:52,485,107-52,488,057  | AX-90029297  |
| TNNC1 | ---         | chr3:52,485,107-52,488,057  | AX-90033359  |
| TNNC1 | rs267607123 | chr3:52,485,107-52,488,057  | AX-90026979  |
| TNNC1 | rs72965257  | chr3:52,485,107-52,488,057  | AX-34346515  |
| TNNC1 | rs267607125 | chr3:52,485,107-52,488,057  | AX-90055865  |
| TNNI3 | rs104894725 | chr19:55,663,136-55,669,100 | AX-88754567  |
| TNNI3 | ---         | chr19:55,663,136-55,669,100 | AX-90055149  |
| TNNI3 | ---         | chr19:55,663,136-55,669,100 | AX-90055150  |
| TNNI3 | rs267607127 | chr19:55,663,136-55,669,100 | AX-90026266  |
| TNNI3 | ---         | chr19:55,663,136-55,669,100 | AX-90031577  |

|       |             |                             |              |
|-------|-------------|-----------------------------|--------------|
| TNNI3 | ---         | chr19:55,663,136-55,669,100 | AX-90065723  |
| TNNI3 | ---         | chr19:55,663,136-55,669,100 | AX-90036815  |
| TNNI3 | ---         | chr19:55,663,136-55,669,100 | AX-90026267  |
| TNNI3 | ---         | chr19:55,663,136-55,669,100 | AX-90055153  |
| TNNI3 | ---         | chr19:55,663,136-55,669,100 | AX-90028768  |
| TNNI3 | rs104894729 | chr19:55,663,136-55,669,100 | AX-86894435  |
| TNNI3 | ---         | chr19:55,663,136-55,669,100 | AX-90058440  |
| TNNI3 | rs397516357 | chr19:55,663,136-55,669,100 | AX-86894502  |
| TNNI3 | rs267607129 | chr19:55,663,136-55,669,100 | AX-90059262  |
| TNNI3 | rs397516356 | chr19:55,663,136-55,669,100 | AX-90060465  |
| TNNI3 | rs72301544  | chr19:55,663,136-55,669,100 | AX-122836764 |
| TNNI3 | rs72301544  | chr19:55,663,136-55,669,100 | AX-156297909 |
| TNNI3 | rs28591612  | chr19:55,663,136-55,669,100 | AX-32795767  |
| TNNI3 | rs78694716  | chr19:55,663,136-55,669,100 | AX-148483636 |
| TNNI3 | rs78694716  | chr19:55,663,136-55,669,100 | AX-156283236 |
| TNNI3 | rs117989514 | chr19:55,663,136-55,669,100 | AX-54836419  |
| TNNI3 | rs75062926  | chr19:55,663,136-55,669,100 | AX-156272763 |
| TNNI3 | rs75062926  | chr19:55,663,136-55,669,100 | AX-156290810 |
| TNNI3 | rs11671466  | chr19:55,663,136-55,669,100 | AX-92420765  |
| TNNI3 | rs11671466  | chr19:55,663,136-55,669,100 | AX-92631788  |
| TNNI3 | rs10414493  | chr19:55,663,136-55,669,100 | AX-32795771  |
| TNNI3 | rs10414696  | chr19:55,663,136-55,669,100 | AX-40475201  |
| TNNI3 | rs201521806 | chr19:55,663,136-55,669,100 | AX-151447803 |
| TNNI3 | rs201521806 | chr19:55,663,136-55,669,100 | AX-156286015 |
| TNNI3 | ---         | chr19:55,663,136-55,669,100 | AX-90026269  |
| TNNI3 | rs397516355 | chr19:55,663,136-55,669,100 | AX-90036056  |
| TNNI3 | rs3729841   | chr19:55,663,136-55,669,100 | AX-50264634  |
| TNNI3 | ---         | chr19:55,663,136-55,669,100 | AX-90073025  |
| TNNI3 | rs121917761 | chr19:55,663,136-55,669,100 | AX-88797681  |
| TNNI3 | ---         | chr19:55,663,136-55,669,100 | AX-90026270  |
| TNNI3 | ---         | chr19:55,663,136-55,669,100 | AX-90046430  |
| TNNI3 | ---         | chr19:55,663,136-55,669,100 | AX-90026271  |
| TNNI3 | rs546367368 | chr19:55,663,136-55,669,100 | AX-90066022  |
| TNNI3 | ---         | chr19:55,663,136-55,669,100 | AX-86626008  |
| TNNI3 | ---         | chr19:55,663,136-55,669,100 | AX-90031238  |
| TNNI3 | rs368861241 | chr19:55,663,136-55,669,100 | AX-86700980  |
| TNNI3 | rs397516353 | chr19:55,663,136-55,669,100 | AX-86894503  |
| TNNI3 | rs397516349 | chr19:55,663,136-55,669,100 | AX-86668168  |
| TNNI3 | ---         | chr19:55,663,136-55,669,100 | AX-90026273  |
| TNNI3 | ---         | chr19:55,663,136-55,669,100 | AX-90041297  |
| TNNI3 | ---         | chr19:55,663,136-55,669,100 | AX-90041369  |
| TNNI3 | ---         | chr19:55,663,136-55,669,100 | AX-90055159  |
| TNNI3 | rs397516347 | chr19:55,663,136-55,669,100 | AX-86894456  |
| TNNI3 | ---         | chr19:55,663,136-55,669,100 | AX-90029771  |
| TNNI3 | ---         | chr19:55,663,136-55,669,100 | AX-90033897  |
| TNNI3 | ---         | chr19:55,663,136-55,669,100 | AX-90026275  |
| TNNI3 | ---         | chr19:55,663,136-55,669,100 | AX-90033952  |
| TNNI3 | rs140633085 | chr19:55,663,136-55,669,100 | AX-151441517 |
| TNNI3 | rs140633085 | chr19:55,663,136-55,669,100 | AX-156288798 |
| TNNI3 | rs62126324  | chr19:55,663,136-55,669,100 | AX-92411987  |
| TNNI3 | rs62126324  | chr19:55,663,136-55,669,100 | AX-96853954  |
| TNNI3 | rs62126325  | chr19:55,663,136-55,669,100 | AX-92507891  |
| TNNI3 | rs62126325  | chr19:55,663,136-55,669,100 | AX-92718914  |
| TNNI3 | ---         | chr19:55,663,136-55,669,100 | AX-90028331  |
| TNNI3 | rs77615401  | chr19:55,663,136-55,669,100 | AX-32795783  |

|       |             |                              |              |
|-------|-------------|------------------------------|--------------|
| TNNI3 | ---         | chr19:55,663,136-55,669,100  | AX-90026276  |
| TNNI3 | rs3729711   | chr19:55,663,136-55,669,100  | AX-40475209  |
| TNNI3 | rs3729710   | chr19:55,663,136-55,669,100  | AX-83480316  |
| TNNI3 | rs3729709   | chr19:55,663,136-55,669,100  | AX-40475213  |
| TNNI3 | rs73617692  | chr19:55,663,136-55,669,100  | AX-32795787  |
| TNNI3 | rs73617693  | chr19:55,663,136-55,669,100  | AX-32795789  |
| TNNI3 | rs28526132  | chr19:55,663,136-55,669,100  | AX-32795791  |
| TNNI3 | rs3729838   | chr19:55,663,136-55,669,100  | AX-40475221  |
| TNNI3 | ---         | chr19:55,663,136-55,669,100  | AX-86693617  |
| TNNI3 | ---         | chr19:55,663,136-55,669,100  | AX-90060270  |
| TNNI3 | rs3729836   | chr19:55,663,136-55,669,100  | AX-156265659 |
| TNNI3 | rs3729836   | chr19:55,663,136-55,669,100  | AX-92458744  |
| TNNI3 | rs113899745 | chr19:55,663,136-55,669,100  | AX-82885183  |
| TNNI3 | rs202087239 | chr19:55,663,136-55,669,100  | AX-92733012  |
| TNNI3 | rs11671293  | chr19:55,663,136-55,669,100  | AX-40475223  |
| TNNI3 | rs11667847  | chr19:55,663,136-55,669,100  | AX-32795797  |
| TNNI3 | rs3729708   | chr19:55,663,136-55,669,100  | AX-119441042 |
| TNNI3 | rs3729708   | chr19:55,663,136-55,669,100  | AX-97374470  |
| TNNI3 | rs397516359 | chr19:55,663,136-55,669,100  | AX-86691086  |
| TNNI3 | rs3729707   | chr19:55,663,136-55,669,100  | AX-156265660 |
| TNNI3 | rs3729707   | chr19:55,663,136-55,669,100  | AX-156265693 |
| TNNT2 | rs45576635  | chr1:201,328,136-201,346,828 | AX-30416733  |
| TNNT2 | ---         | chr1:201,328,136-201,346,828 | AX-90065088  |
| TNNT2 | rs121964861 | chr1:201,328,136-201,346,828 | AX-88754924  |
| TNNT2 | rs397516483 | chr1:201,328,136-201,346,828 | AX-90063229  |
| TNNT2 | rs2275863   | chr1:201,328,136-201,346,828 | AX-39249945  |
| TNNT2 | rs45509695  | chr1:201,328,136-201,346,828 | AX-156270643 |
| TNNT2 | rs45509695  | chr1:201,328,136-201,346,828 | AX-156289409 |
| TNNT2 | rs7521796   | chr1:201,328,136-201,346,828 | AX-39249951  |
| TNNT2 | rs10920181  | chr1:201,328,136-201,346,828 | AX-39249953  |
| TNNT2 | rs12564577  | chr1:201,328,136-201,346,828 | AX-39249955  |
| TNNT2 | rs3730238   | chr1:201,328,136-201,346,828 | AX-39249961  |
| TNNT2 | ---         | chr1:201,328,136-201,346,828 | AX-90032640  |
| TNNT2 | rs45466197  | chr1:201,328,136-201,346,828 | AX-83012305  |
| TNNT2 | rs2275861   | chr1:201,328,136-201,346,828 | AX-156279921 |
| TNNT2 | rs2275861   | chr1:201,328,136-201,346,828 | AX-156295480 |
| TNNT2 | rs3730240   | chr1:201,328,136-201,346,828 | AX-39249963  |
| TNNT2 | rs121964860 | chr1:201,328,136-201,346,828 | AX-88754923  |
| TNNT2 | rs11810834  | chr1:201,328,136-201,346,828 | AX-30416759  |
| TNNT2 | rs11807637  | chr1:201,328,136-201,346,828 | AX-39249965  |
| TNNT2 | rs11806184  | chr1:201,328,136-201,346,828 | AX-39249967  |
| TNNT2 | ---         | chr1:201,328,136-201,346,828 | AX-90046193  |
| TNNT2 | rs1104859   | chr1:201,328,136-201,346,828 | AX-39249969  |
| TNNT2 | rs2365652   | chr1:201,328,136-201,346,828 | AX-39249973  |
| TNNT2 | rs1104858   | chr1:201,328,136-201,346,828 | AX-30416771  |
| TNNT2 | rs1892027   | chr1:201,328,136-201,346,828 | AX-39249975  |
| TNNT2 | ---         | chr1:201,328,136-201,346,828 | AX-90054589  |
| TNNT2 | ---         | chr1:201,328,136-201,346,828 | AX-90071828  |
| TNNT2 | rs397516471 | chr1:201,328,136-201,346,828 | AX-90033058  |
| TNNT2 | ---         | chr1:201,328,136-201,346,828 | AX-90062823  |
| TNNT2 | ---         | chr1:201,328,136-201,346,828 | AX-90064371  |
| TNNT2 | rs11808175  | chr1:201,328,136-201,346,828 | AX-156270644 |
| TNNT2 | rs11808175  | chr1:201,328,136-201,346,828 | AX-156289410 |
| TNNT2 | rs1892026   | chr1:201,328,136-201,346,828 | AX-39249989  |
| TNNT2 | rs1892025   | chr1:201,328,136-201,346,828 | AX-123024761 |

|       |             |                              |              |
|-------|-------------|------------------------------|--------------|
| TNNT2 | rs2001410   | chr1:201,328,136-201,346,828 | AX-30416777  |
| TNNT2 | rs201048783 | chr1:201,328,136-201,346,828 | AX-90068398  |
| TNNT2 | rs483352832 | chr1:201,328,136-201,346,828 | AX-90054591  |
| TNNT2 | ---         | chr1:201,328,136-201,346,828 | AX-90025707  |
| TNNT2 | ---         | chr1:201,328,136-201,346,828 | AX-86618914  |
| TNNT2 | ---         | chr1:201,328,136-201,346,828 | AX-86894430  |
| TNNT2 | rs397516466 | chr1:201,328,136-201,346,828 | AX-90025708  |
| TNNT2 | ---         | chr1:201,328,136-201,346,828 | AX-90062975  |
| TNNT2 | rs74315380  | chr1:201,328,136-201,346,828 | AX-88754804  |
| TNNT2 | rs3767546   | chr1:201,328,136-201,346,828 | AX-156270645 |
| TNNT2 | rs3767546   | chr1:201,328,136-201,346,828 | AX-156289411 |
| TNNT2 | rs10920182  | chr1:201,328,136-201,346,828 | AX-39249999  |
| TNNT2 | ---         | chr1:201,328,136-201,346,828 | AX-90054595  |
| TNNT2 | ---         | chr1:201,328,136-201,346,828 | AX-90054596  |
| TNNT2 | ---         | chr1:201,328,136-201,346,828 | AX-90025712  |
| TNNT2 | rs3729547   | chr1:201,328,136-201,346,828 | AX-11476389  |
| TNNT2 | ---         | chr1:201,328,136-201,346,828 | AX-90054598  |
| TNNT2 | ---         | chr1:201,328,136-201,346,828 | AX-90078005  |
| TNNT2 | rs397516459 | chr1:201,328,136-201,346,828 | AX-90025714  |
| TNNT2 | ---         | chr1:201,328,136-201,346,828 | AX-90048032  |
| TNNT2 | ---         | chr1:201,328,136-201,346,828 | AX-90025715  |
| TNNT2 | ---         | chr1:201,328,136-201,346,828 | AX-90054601  |
| TNNT2 | ---         | chr1:201,328,136-201,346,828 | AX-90025717  |
| TNNT2 | rs397516456 | chr1:201,328,136-201,346,828 | AX-86894453  |
| TNNT2 | ---         | chr1:201,328,136-201,346,828 | AX-90025718  |
| TNNT2 | ---         | chr1:201,328,136-201,346,828 | AX-90054604  |
| TNNT2 | rs397516455 | chr1:201,328,136-201,346,828 | AX-90025720  |
| TNNT2 | ---         | chr1:201,328,136-201,346,828 | AX-90025721  |
| TNNT2 | ---         | chr1:201,328,136-201,346,828 | AX-86548045  |
| TNNT2 | ---         | chr1:201,328,136-201,346,828 | AX-90034437  |
| TNNT2 | ---         | chr1:201,328,136-201,346,828 | AX-90025722  |
| TNNT2 | rs397516451 | chr1:201,328,136-201,346,828 | AX-90028451  |
| TNNT2 | rs121964855 | chr1:201,328,136-201,346,828 | AX-86894480  |
| TNNT2 | rs144900708 | chr1:201,328,136-201,346,828 | AX-83092825  |
| TNNT2 | rs397516450 | chr1:201,328,136-201,346,828 | AX-90031203  |
| TNNT2 | ---         | chr1:201,328,136-201,346,828 | AX-90033366  |
| TNNT2 | rs3729845   | chr1:201,328,136-201,346,828 | AX-11476405  |
| TNNT2 | rs3841823   | chr1:201,328,136-201,346,828 | AX-88811926  |
| TNNT2 | rs7544061   | chr1:201,328,136-201,346,828 | AX-156270646 |
| TNNT2 | rs7544061   | chr1:201,328,136-201,346,828 | AX-156289412 |
| TNNT2 | ---         | chr1:201,328,136-201,346,828 | AX-90054608  |
| TNNT2 | rs45449197  | chr1:201,328,136-201,346,828 | AX-30416807  |
| TNNT2 | rs45585240  | chr1:201,328,136-201,346,828 | AX-30416809  |
| TNNT2 | rs10800775  | chr1:201,328,136-201,346,828 | AX-39250017  |
| TNNT2 | rs1892028   | chr1:201,328,136-201,346,828 | AX-39250019  |
| TNNT2 | ---         | chr1:201,328,136-201,346,828 | AX-90060984  |
| TNNT2 | rs3729843   | chr1:201,328,136-201,346,828 | AX-39250025  |
| TNNT2 | rs3729842   | chr1:201,328,136-201,346,828 | AX-39250027  |
| TNNT2 | ---         | chr1:201,328,136-201,346,828 | AX-90061720  |
| TNNT2 | rs3753999   | chr1:201,328,136-201,346,828 | AX-39250031  |
| TNNT2 | rs3753997   | chr1:201,328,136-201,346,828 | AX-39250033  |
| TNNT2 | rs79556064  | chr1:201,328,136-201,346,828 | AX-37431007  |
| TNNT2 | rs16848462  | chr1:201,328,136-201,346,828 | AX-39250039  |
| TNNT2 | rs10800776  | chr1:201,328,136-201,346,828 | AX-156265646 |
| TNNT2 | rs10920183  | chr1:201,328,136-201,346,828 | AX-39250045  |

|       |             |                              |              |
|-------|-------------|------------------------------|--------------|
| TNNT2 | rs10920184  | chr1:201,328,136-201,346,828 | AX-107849877 |
| TNNT2 | rs10920184  | chr1:201,328,136-201,346,828 | AX-156265682 |
| TNNT2 | ---         | chr1:201,328,136-201,346,828 | AX-30416823  |
| TNNT2 | rs45584633  | chr1:201,328,136-201,346,828 | AX-156265643 |
| TNNT2 | rs45584633  | chr1:201,328,136-201,346,828 | AX-156265678 |
| TNNT2 | rs541173867 | chr1:201,328,136-201,346,828 | AX-151432957 |
| TNNT2 | rs541173867 | chr1:201,328,136-201,346,828 | AX-156298619 |
| TNNT2 | rs1419276   | chr1:201,328,136-201,346,828 | AX-39250049  |
| TNNT2 | rs12567686  | chr1:201,328,136-201,346,828 | AX-156266185 |
| TNNT2 | rs12567686  | chr1:201,328,136-201,346,828 | AX-156286772 |
| TNNT2 | rs149812965 | chr1:201,328,136-201,346,828 | AX-151358932 |
| TNNT2 | rs149812965 | chr1:201,328,136-201,346,828 | AX-156284259 |
| TNNT2 | rs4915240   | chr1:201,328,136-201,346,828 | AX-39250053  |
| TNNT2 | rs6427901   | chr1:201,328,136-201,346,828 | AX-39250055  |
| TNNT2 | rs115156877 | chr1:201,328,136-201,346,828 | AX-30416841  |
| TNNT2 | rs45533739  | chr1:201,328,136-201,346,828 | AX-83447214  |
| TNNT2 | rs868407    | chr1:201,328,136-201,346,828 | AX-123130871 |
| TNNT2 | rs868407    | chr1:201,328,136-201,346,828 | AX-123130872 |
| TNNT2 | rs6663175   | chr1:201,328,136-201,346,828 | AX-16791526  |
| TNNT2 | rs10920186  | chr1:201,328,136-201,346,828 | AX-30416851  |
| TNNT2 | rs12567382  | chr1:201,328,136-201,346,828 | AX-30416853  |
| TNNT2 | rs12568262  | chr1:201,328,136-201,346,828 | AX-30416857  |
| TNNT2 | rs1539693   | chr1:201,328,136-201,346,828 | AX-123024762 |
| TNNT2 | rs1539693   | chr1:201,328,136-201,346,828 | AX-123024763 |
| TNNT2 | rs3020557   | chr1:201,328,136-201,346,828 | AX-92686101  |
| TNNT2 | rs3020556   | chr1:201,328,136-201,346,828 | AX-156295481 |
| TNNT2 | rs56126027  | chr1:201,328,136-201,346,828 | AX-30416863  |
| TNNT2 | rs61820016  | chr1:201,328,136-201,346,828 | AX-30416865  |
| TNNT2 | rs56982832  | chr1:201,328,136-201,346,828 | AX-156286773 |
| TNNT2 | rs59982007  | chr1:201,328,136-201,346,828 | AX-30416869  |
| TNNT2 | rs2996494   | chr1:201,328,136-201,346,828 | AX-39250067  |
| TNNT2 | rs2996493   | chr1:201,328,136-201,346,828 | AX-156266187 |
| TNNT2 | rs2996493   | chr1:201,328,136-201,346,828 | AX-156286774 |
| TNNT2 | rs113236409 | chr1:201,328,136-201,346,828 | AX-156266188 |
| TNNT2 | rs113236409 | chr1:201,328,136-201,346,828 | AX-156286775 |
| TNNT2 | rs2996492   | chr1:201,328,136-201,346,828 | AX-156266189 |
| TNNT2 | rs2996492   | chr1:201,328,136-201,346,828 | AX-156286776 |
| TNNT2 | rs73076669  | chr1:201,328,136-201,346,828 | AX-30416877  |
| TNNT2 | rs12566896  | chr1:201,328,136-201,346,828 | AX-156266190 |
| TNNT2 | rs12566896  | chr1:201,328,136-201,346,828 | AX-156286777 |
| TNNT2 | rs60086234  | chr1:201,328,136-201,346,828 | AX-113652059 |
| TNNT2 | rs60086234  | chr1:201,328,136-201,346,828 | AX-123132893 |
| TNNT2 | rs73076673  | chr1:201,328,136-201,346,828 | AX-156266191 |
| TNNT2 | rs73076673  | chr1:201,328,136-201,346,828 | AX-156286778 |
| TNNT2 | rs74136606  | chr1:201,328,136-201,346,828 | AX-156266192 |
| TNNT2 | rs74136606  | chr1:201,328,136-201,346,828 | AX-156286779 |
| TNNT2 | rs75826050  | chr1:201,328,136-201,346,828 | AX-156266193 |
| TNNT2 | rs12568802  | chr1:201,328,136-201,346,828 | AX-39250069  |
| TNNT2 | rs12563097  | chr1:201,328,136-201,346,828 | AX-39250071  |
| TNNT2 | rs12563114  | chr1:201,328,136-201,346,828 | AX-39250075  |
| TNNT2 | rs12568177  | chr1:201,328,136-201,346,828 | AX-39250077  |
| TNNT2 | rs12564416  | chr1:201,328,136-201,346,828 | AX-156279923 |
| TNNT2 | rs12564416  | chr1:201,328,136-201,346,828 | AX-156295482 |
| TNNT2 | rs947486    | chr1:201,328,136-201,346,828 | AX-39250081  |
| TNNT2 | rs947485    | chr1:201,328,136-201,346,828 | AX-39250083  |

|       |             |                              |              |
|-------|-------------|------------------------------|--------------|
| TNNT2 | rs12564445  | chr1:201,328,136-201,346,828 | AX-39250085  |
| TPM1  | rs397516364 | chr15:63,334,838-63,364,113  | AX-90065672  |
| TPM1  | rs199476301 | chr15:63,334,838-63,364,113  | AX-90040932  |
| TPM1  | rs397516382 | chr15:63,334,838-63,364,113  | AX-90063927  |
| TPM1  | rs199476303 | chr15:63,334,838-63,364,113  | AX-90040933  |
| TPM1  | ---         | chr15:63,334,838-63,364,113  | AX-90069788  |
| TPM1  | rs199476304 | chr15:63,334,838-63,364,113  | AX-90069820  |
| TPM1  | rs199476305 | chr15:63,334,838-63,364,113  | AX-90069821  |
| TPM1  | rs199476306 | chr15:63,334,838-63,364,113  | AX-90069822  |
| TPM1  | ---         | chr15:63,334,838-63,364,113  | AX-90065914  |
| TPM1  | rs6494386   | chr15:63,334,838-63,364,113  | AX-31668665  |
| TPM1  | rs5813188   | chr15:63,334,838-63,364,113  | AX-121135762 |
| TPM1  | rs5813188   | chr15:63,334,838-63,364,113  | AX-156280293 |
| TPM1  | rs8042331   | chr15:63,334,838-63,364,113  | AX-156271457 |
| TPM1  | rs8026502   | chr15:63,334,838-63,364,113  | AX-31668671  |
| TPM1  | rs79854225  | chr15:63,334,838-63,364,113  | AX-12949668  |
| TPM1  | rs57645645  | chr15:63,334,838-63,364,113  | AX-31668673  |
| TPM1  | rs76273871  | chr15:63,334,838-63,364,113  | AX-31668675  |
| TPM1  | rs4075583   | chr15:63,334,838-63,364,113  | AX-12949669  |
| TPM1  | rs4075584   | chr15:63,334,838-63,364,113  | AX-156289933 |
| TPM1  | rs73431508  | chr15:63,334,838-63,364,113  | AX-156271459 |
| TPM1  | rs148517607 | chr15:63,334,838-63,364,113  | AX-88768005  |
| TPM1  | rs148517607 | chr15:63,334,838-63,364,113  | AX-88811050  |
| TPM1  | rs11856618  | chr15:63,334,838-63,364,113  | AX-31668679  |
| TPM1  | rs66793829  | chr15:63,334,838-63,364,113  | AX-12949671  |
| TPM1  | rs78880342  | chr15:63,334,838-63,364,113  | AX-31668681  |
| TPM1  | rs12441488  | chr15:63,334,838-63,364,113  | AX-31668685  |
| TPM1  | rs28609950  | chr15:63,334,838-63,364,113  | AX-31668687  |
| TPM1  | rs16946345  | chr15:63,334,838-63,364,113  | AX-39927149  |
| TPM1  | rs11071720  | chr15:63,334,838-63,364,113  | AX-12949672  |
| TPM1  | rs74685685  | chr15:63,334,838-63,364,113  | AX-112926699 |
| TPM1  | rs74685685  | chr15:63,334,838-63,364,113  | AX-113483340 |
| TPM1  | rs76113767  | chr15:63,334,838-63,364,113  | AX-12949674  |
| TPM1  | rs3803499   | chr15:63,334,838-63,364,113  | AX-107829457 |
| TPM1  | rs3803499   | chr15:63,334,838-63,364,113  | AX-113474644 |
| TPM1  | rs3840027   | chr15:63,334,838-63,364,113  | AX-88773414  |
| TPM1  | rs199942026 | chr15:63,334,838-63,364,113  | AX-113026869 |
| TPM1  | rs570374605 | chr15:63,334,838-63,364,113  | AX-90056107  |
| TPM1  | rs17752921  | chr15:63,334,838-63,364,113  | AX-11338484  |
| TPM1  | rs3840028   | chr15:63,334,838-63,364,113  | AX-107785641 |
| TPM1  | rs35363782  | chr15:63,334,838-63,364,113  | AX-107808988 |
| TPM1  | rs55719615  | chr15:63,334,838-63,364,113  | AX-112992132 |
| TPM1  | rs200383195 | chr15:63,334,838-63,364,113  | AX-151211951 |
| TPM1  | rs200383195 | chr15:63,334,838-63,364,113  | AX-156298026 |
| TPM1  | rs1135403   | chr15:63,334,838-63,364,113  | AX-39927153  |
| TPM1  | rs6494387   | chr15:63,334,838-63,364,113  | AX-39927157  |
| TPM1  | rs7170462   | chr15:63,334,838-63,364,113  | AX-39927159  |
| TPM1  | rs5813192   | chr15:63,334,838-63,364,113  | AX-156284498 |
| TPM1  | rs1574311   | chr15:63,334,838-63,364,113  | AX-12949679  |
| TPM1  | rs4468558   | chr15:63,334,838-63,364,113  | AX-12949680  |
| TPM1  | rs4238370   | chr15:63,334,838-63,364,113  | AX-12949683  |
| TPM1  | rs4238371   | chr15:63,334,838-63,364,113  | AX-12949684  |
| TPM1  | rs16946372  | chr15:63,334,838-63,364,113  | AX-39927163  |
| TPM1  | rs16953467  | chr15:63,334,838-63,364,113  | AX-39927165  |
| TPM1  | rs16953475  | chr15:63,334,838-63,364,113  | AX-12949685  |



|      |             |                             |              |
|------|-------------|-----------------------------|--------------|
| TPM1 | rs72743223  | chr15:63,334,838-63,364,113 | AX-31668713  |
| TPM1 | rs7166724   | chr15:63,334,838-63,364,113 | AX-39927167  |
| TPM1 | rs7166624   | chr15:63,334,838-63,364,113 | AX-114236690 |
| TPM1 | rs28645615  | chr15:63,334,838-63,364,113 | AX-148662507 |
| TPM1 | rs28645615  | chr15:63,334,838-63,364,113 | AX-92589086  |
| TPM1 | ---         | chr15:63,334,838-63,364,113 | AX-119987801 |
| TPM1 | rs4775613   | chr15:63,334,838-63,364,113 | AX-11525364  |
| TPM1 | rs28485524  | chr15:63,334,838-63,364,113 | AX-12949689  |
| TPM1 | rs199476310 | chr15:63,334,838-63,364,113 | AX-90040938  |
| TPM1 | rs104894504 | chr15:63,334,838-63,364,113 | AX-90069789  |
| TPM1 | ---         | chr15:63,334,838-63,364,113 | AX-90036600  |
| TPM1 | rs7173072   | chr15:63,334,838-63,364,113 | AX-39927171  |
| TPM1 | rs17753220  | chr15:63,334,838-63,364,113 | AX-11338500  |
| TPM1 | rs67399516  | chr15:63,334,838-63,364,113 | AX-107708515 |
| TPM1 | rs67399516  | chr15:63,334,838-63,364,113 | AX-156285153 |
| TPM1 | rs4450350   | chr15:63,334,838-63,364,113 | AX-11506148  |
| TPM1 | rs11071721  | chr15:63,334,838-63,364,113 | AX-12949691  |
| TPM1 | rs73438597  | chr15:63,334,838-63,364,113 | AX-12949692  |
| TPM1 | rs11071722  | chr15:63,334,838-63,364,113 | AX-12949693  |
| TPM1 | rs80349772  | chr15:63,334,838-63,364,113 | AX-12949695  |
| TPM1 | rs28531385  | chr15:63,334,838-63,364,113 | AX-31668721  |
| TPM1 | rs4238372   | chr15:63,334,838-63,364,113 | AX-11497611  |
| TPM1 | rs73440404  | chr15:63,334,838-63,364,113 | AX-12949698  |
| TPM1 | rs4775614   | chr15:63,334,838-63,364,113 | AX-12949699  |
| TPM1 | rs1071646   | chr15:63,334,838-63,364,113 | AX-12949700  |
| TPM1 | rs199476311 | chr15:63,334,838-63,364,113 | AX-90040939  |
| TPM1 | rs3803501   | chr15:63,334,838-63,364,113 | AX-12562063  |
| TPM1 | rs3803502   | chr15:63,334,838-63,364,113 | AX-156271460 |
| TPM1 | rs3803502   | chr15:63,334,838-63,364,113 | AX-156289935 |
| TPM1 | rs7162932   | chr15:63,334,838-63,364,113 | AX-39927177  |
| TPM1 | rs199476312 | chr15:63,334,838-63,364,113 | AX-86562641  |
| TPM1 | rs104894503 | chr15:63,334,838-63,364,113 | AX-90040900  |
| TPM1 | ---         | chr15:63,334,838-63,364,113 | AX-90032725  |
| TPM1 | ---         | chr15:63,334,838-63,364,113 | AX-90040899  |
| TPM1 | rs199476314 | chr15:63,334,838-63,364,113 | AX-90069826  |
| TPM1 | rs144700226 | chr15:63,334,838-63,364,113 | AX-83424373  |
| TPM1 | rs4774472   | chr15:63,334,838-63,364,113 | AX-39927181  |
| TPM1 | rs199476315 | chr15:63,334,838-63,364,113 | AX-86894434  |
| TPM1 | rs397516487 | chr15:63,334,838-63,364,113 | AX-90034112  |
| TPM1 | rs199476316 | chr15:63,334,838-63,364,113 | AX-90069827  |
| TPM1 | rs199476319 | chr15:63,334,838-63,364,113 | AX-90040942  |
| TPM1 | rs372214593 | chr15:63,334,838-63,364,113 | AX-94358682  |
| TPM1 | ---         | chr15:63,334,838-63,364,113 | AX-11206528  |
| TPM1 | rs11071723  | chr15:63,334,838-63,364,113 | AX-12949706  |
| TPM1 | rs12148828  | chr15:63,334,838-63,364,113 | AX-96062610  |
| TPM1 | rs555534926 | chr15:63,334,838-63,364,113 | AX-90034686  |
| TPM1 | rs16946410  | chr15:63,334,838-63,364,113 | AX-39927185  |
| TPM1 | rs75449003  | chr15:63,334,838-63,364,113 | AX-12949709  |
| TPM1 | rs8042050   | chr15:63,334,838-63,364,113 | AX-39927187  |
| TPM1 | rs28660606  | chr15:63,334,838-63,364,113 | AX-113729304 |
| TPM1 | rs28660606  | chr15:63,334,838-63,364,113 | AX-156271461 |
| TPM1 | rs397516392 | chr15:63,334,838-63,364,113 | AX-90060612  |
| TPM1 | rs28730803  | chr15:63,334,838-63,364,113 | AX-31668739  |
| TPM1 | rs73440420  | chr15:63,334,838-63,364,113 | AX-12949714  |
| TPM1 | rs16946416  | chr15:63,334,838-63,364,113 | AX-12949717  |

|      |             |                              |              |
|------|-------------|------------------------------|--------------|
| TPM1 | rs11636549  | chr15:63,334,838-63,364,113  | AX-156271462 |
| TPM1 | rs11636549  | chr15:63,334,838-63,364,113  | AX-156289936 |
| TPM1 | rs28583444  | chr15:63,334,838-63,364,113  | AX-156289937 |
| TPM1 | rs374459540 | chr15:63,334,838-63,364,113  | AX-94375433  |
| TPM1 | rs28512289  | chr15:63,334,838-63,364,113  | AX-156271464 |
| TPM1 | rs28512289  | chr15:63,334,838-63,364,113  | AX-156289938 |
| TPM1 | rs28735896  | chr15:63,334,838-63,364,113  | AX-156271465 |
| TPM1 | rs28735896  | chr15:63,334,838-63,364,113  | AX-156289939 |
| TPM1 | rs17826341  | chr15:63,334,838-63,364,113  | AX-156271466 |
| TPM1 | rs146808377 | chr15:63,334,838-63,364,113  | AX-156284603 |
| TPM1 | rs4619348   | chr15:63,334,838-63,364,113  | AX-12949722  |
| TPM1 | rs77372534  | chr15:63,334,838-63,364,113  | AX-156271467 |
| TPM1 | rs77372534  | chr15:63,334,838-63,364,113  | AX-156289941 |
| TPM1 | rs73440424  | chr15:63,334,838-63,364,113  | AX-12949725  |
| TPM1 | rs2729826   | chr15:63,334,838-63,364,113  | AX-12949726  |
| TPM1 | rs2729827   | chr15:63,334,838-63,364,113  | AX-39927197  |
| TPM1 | rs8040219   | chr15:63,334,838-63,364,113  | AX-12949727  |
| TPM1 | rs1972041   | chr15:63,334,838-63,364,113  | AX-11356775  |
| TPM1 | rs34359816  | chr15:63,334,838-63,364,113  | AX-12949728  |
| TPM1 | rs112894511 | chr15:63,334,838-63,364,113  | AX-148128674 |
| TPM1 | rs112894511 | chr15:63,334,838-63,364,113  | AX-88317995  |
| TPM1 | rs2173982   | chr15:63,334,838-63,364,113  | AX-123079078 |
| TPM1 | rs2173982   | chr15:63,334,838-63,364,113  | AX-123079079 |
| TPM1 | rs2729828   | chr15:63,334,838-63,364,113  | AX-156271468 |
| TPM1 | rs2729828   | chr15:63,334,838-63,364,113  | AX-92549739  |
| TPM1 | rs73440433  | chr15:63,334,838-63,364,113  | AX-12949733  |
| TPM1 | ---         | chr15:63,334,838-63,364,113  | AX-123003239 |
| TPM1 | ---         | chr15:63,334,838-63,364,113  | AX-123003240 |
| TPM1 | rs68083918  | chr15:63,334,838-63,364,113  | AX-105051176 |
| TPM1 | rs68083918  | chr15:63,334,838-63,364,113  | AX-113352535 |
| TPM1 | rs9920576   | chr15:63,334,838-63,364,113  | AX-39927201  |
| TPM1 | rs144045691 | chr15:63,334,838-63,364,113  | AX-83039629  |
| TPM1 | rs1050255   | chr15:63,334,838-63,364,113  | AX-12391663  |
| TPM1 | rs8519      | chr15:63,334,838-63,364,113  | AX-39927207  |
| TPM1 | rs707602    | chr15:63,334,838-63,364,113  | AX-12619776  |
| TPM1 | rs6738      | chr15:63,334,838-63,364,113  | AX-12607735  |
| TPM1 | rs7178040   | chr15:63,334,838-63,364,113  | AX-39927209  |
| TTN  | rs281864929 | chr2:179,390,717-179,672,150 | AX-90029929  |
| TTN  | rs281864930 | chr2:179,390,717-179,672,150 | AX-90047286  |
| TTN  | rs267607156 | chr2:179,390,717-179,672,150 | AX-90027182  |
| TTN  | ---         | chr2:179,390,717-179,672,150 | AX-90033436  |
| TTN  | rs281864931 | chr2:179,390,717-179,672,150 | AX-90034831  |
| TTN  | rs16866373  | chr2:179,390,717-179,672,150 | AX-13767752  |
| TTN  | rs72629793  | chr2:179,390,717-179,672,150 | AX-83011396  |
| TTN  | rs16866378  | chr2:179,390,717-179,672,150 | AX-11285024  |
| TTN  | rs55842557  | chr2:179,390,717-179,672,150 | AX-83050073  |
| TTN  | ---         | chr2:179,390,717-179,672,150 | AX-90073909  |
| TTN  | rs56324602  | chr2:179,390,717-179,672,150 | AX-83521932  |
| TTN  | rs56207956  | chr2:179,390,717-179,672,150 | AX-13767757  |
| TTN  | rs66961115  | chr2:179,390,717-179,672,150 | AX-83165791  |
| TTN  | rs16866380  | chr2:179,390,717-179,672,150 | AX-13767758  |
| TTN  | rs56324595  | chr2:179,390,717-179,672,150 | AX-33413111  |
| TTN  | rs3829749   | chr2:179,390,717-179,672,150 | AX-11483960  |
| TTN  | ---         | chr2:179,390,717-179,672,150 | AX-90075580  |
| TTN  | rs3813250   | chr2:179,390,717-179,672,150 | AX-11482707  |

|     |             |                              |             |
|-----|-------------|------------------------------|-------------|
| TTN | rs56308529  | chr2:179,390,717-179,672,150 | AX-33413113 |
| TTN | rs568460311 | chr2:179,390,717-179,672,150 | AX-86687951 |
| TTN | rs3829748   | chr2:179,390,717-179,672,150 | AX-11483959 |
| TTN | rs201218828 | chr2:179,390,717-179,672,150 | AX-83320023 |
| TTN | rs68080670  | chr2:179,390,717-179,672,150 | AX-83522724 |
| TTN | ---         | chr2:179,390,717-179,672,150 | AX-33413117 |
| TTN | rs199642423 | chr2:179,390,717-179,672,150 | AX-82938542 |
| TTN | rs3829747   | chr2:179,390,717-179,672,150 | AX-11483958 |
| TTN | rs192001910 | chr2:179,390,717-179,672,150 | AX-83305269 |
| TTN | rs148525155 | chr2:179,390,717-179,672,150 | AX-83119621 |
| TTN | rs3731752   | chr2:179,390,717-179,672,150 | AX-13767761 |
| TTN | rs56173891  | chr2:179,390,717-179,672,150 | AX-83328404 |
| TTN | rs56347248  | chr2:179,390,717-179,672,150 | AX-83087555 |
| TTN | rs2857265   | chr2:179,390,717-179,672,150 | AX-11419766 |
| TTN | rs140319117 | chr2:179,390,717-179,672,150 | AX-83020626 |
| TTN | rs144963736 | chr2:179,390,717-179,672,150 | AX-83068896 |
| TTN | rs55669553  | chr2:179,390,717-179,672,150 | AX-83056688 |
| TTN | rs55886356  | chr2:179,390,717-179,672,150 | AX-83077916 |
| TTN | rs34924609  | chr2:179,390,717-179,672,150 | AX-11455314 |
| TTN | rs56273463  | chr2:179,390,717-179,672,150 | AX-83425998 |
| TTN | rs2278196   | chr2:179,390,717-179,672,150 | AX-40776699 |
| TTN | rs200166942 | chr2:179,390,717-179,672,150 | AX-82892455 |
| TTN | rs4894027   | chr2:179,390,717-179,672,150 | AX-33413131 |
| TTN | rs55675869  | chr2:179,390,717-179,672,150 | AX-13767764 |
| TTN | rs55742743  | chr2:179,390,717-179,672,150 | AX-33413133 |
| TTN | rs72648278  | chr2:179,390,717-179,672,150 | AX-83226537 |
| TTN | rs2303539   | chr2:179,390,717-179,672,150 | AX-33413139 |
| TTN | ---         | chr2:179,390,717-179,672,150 | AX-11534157 |
| TTN | rs55977045  | chr2:179,390,717-179,672,150 | AX-33413141 |
| TTN | rs149001703 | chr2:179,390,717-179,672,150 | AX-83140669 |
| TTN | rs72648273  | chr2:179,390,717-179,672,150 | AX-83261632 |
| TTN | rs72648272  | chr2:179,390,717-179,672,150 | AX-83380431 |
| TTN | rs72648270  | chr2:179,390,717-179,672,150 | AX-33413143 |
| TTN | rs2288325   | chr2:179,390,717-179,672,150 | AX-40776701 |
| TTN | ---         | chr2:179,390,717-179,672,150 | AX-90061211 |
| TTN | ---         | chr2:179,390,717-179,672,150 | AX-90064999 |
| TTN | rs3820978   | chr2:179,390,717-179,672,150 | AX-13767768 |
| TTN | rs3731751   | chr2:179,390,717-179,672,150 | AX-37942955 |
| TTN | rs3731750   | chr2:179,390,717-179,672,150 | AX-13767769 |
| TTN | ---         | chr2:179,390,717-179,672,150 | AX-83103746 |
| TTN | rs3731749   | chr2:179,390,717-179,672,150 | AX-11476504 |
| TTN | rs62621236  | chr2:179,390,717-179,672,150 | AX-13767773 |
| TTN | rs199781261 | chr2:179,390,717-179,672,150 | AX-83418558 |
| TTN | rs72648263  | chr2:179,390,717-179,672,150 | AX-83362572 |
| TTN | rs62621206  | chr2:179,390,717-179,672,150 | AX-82980308 |
| TTN | rs191484894 | chr2:179,390,717-179,672,150 | AX-83282341 |
| TTN | ---         | chr2:179,390,717-179,672,150 | AX-90057376 |
| TTN | rs72648257  | chr2:179,390,717-179,672,150 | AX-13767777 |
| TTN | rs72648256  | chr2:179,390,717-179,672,150 | AX-83507166 |
| TTN | rs2288327   | chr2:179,390,717-179,672,150 | AX-33413161 |
| TTN | rs181104321 | chr2:179,390,717-179,672,150 | AX-83292044 |
| TTN | rs67665715  | chr2:179,390,717-179,672,150 | AX-13767779 |
| TTN | rs72648251  | chr2:179,390,717-179,672,150 | AX-83347552 |
| TTN | rs35445420  | chr2:179,390,717-179,672,150 | AX-11464092 |
| TTN | rs3731748   | chr2:179,390,717-179,672,150 | AX-11476503 |

|     |             |                              |              |
|-----|-------------|------------------------------|--------------|
| TTN | rs180975448 | chr2:179,390,717-179,672,150 | AX-82938431  |
| TTN | rs11694623  | chr2:179,390,717-179,672,150 | AX-11168496  |
| TTN | rs16866391  | chr2:179,390,717-179,672,150 | AX-40776707  |
| TTN | rs182422055 | chr2:179,390,717-179,672,150 | AX-83271583  |
| TTN | rs747122    | chr2:179,390,717-179,672,150 | AX-13767780  |
| TTN | rs890578    | chr2:179,390,717-179,672,150 | AX-13767781  |
| TTN | rs148617456 | chr2:179,390,717-179,672,150 | AX-83554854  |
| TTN | rs182549226 | chr2:179,390,717-179,672,150 | AX-83502525  |
| TTN | rs72648244  | chr2:179,390,717-179,672,150 | AX-83409909  |
| TTN | rs11897366  | chr2:179,390,717-179,672,150 | AX-11180961  |
| TTN | rs11887722  | chr2:179,390,717-179,672,150 | AX-40776709  |
| TTN | rs150430592 | chr2:179,390,717-179,672,150 | AX-83144145  |
| TTN | ---         | chr2:179,390,717-179,672,150 | AX-90042684  |
| TTN | ---         | chr2:179,390,717-179,672,150 | AX-90047294  |
| TTN | rs72648238  | chr2:179,390,717-179,672,150 | AX-82885192  |
| TTN | ---         | chr2:179,390,717-179,672,150 | AX-94372114  |
| TTN | rs200513274 | chr2:179,390,717-179,672,150 | AX-83001000  |
| TTN | rs200899806 | chr2:179,390,717-179,672,150 | AX-83032576  |
| TTN | rs146181116 | chr2:179,390,717-179,672,150 | AX-83334645  |
| TTN | rs200305114 | chr2:179,390,717-179,672,150 | AX-96558268  |
| TTN | rs3731747   | chr2:179,390,717-179,672,150 | AX-96548223  |
| TTN | rs147015460 | chr2:179,390,717-179,672,150 | AX-92865283  |
| TTN | rs147015460 | chr2:179,390,717-179,672,150 | AX-96549298  |
| TTN | rs35504893  | chr2:179,390,717-179,672,150 | AX-33413171  |
| TTN | rs16866397  | chr2:179,390,717-179,672,150 | AX-40776715  |
| TTN | rs9808036   | chr2:179,390,717-179,672,150 | AX-11703182  |
| TTN | rs9808377   | chr2:179,390,717-179,672,150 | AX-11703204  |
| TTN | rs183013408 | chr2:179,390,717-179,672,150 | AX-83240499  |
| TTN | rs72648229  | chr2:179,390,717-179,672,150 | AX-13767789  |
| TTN | rs72648227  | chr2:179,390,717-179,672,150 | AX-82907153  |
| TTN | rs12621078  | chr2:179,390,717-179,672,150 | AX-11218715  |
| TTN | rs73036370  | chr2:179,390,717-179,672,150 | AX-13767790  |
| TTN | rs201611599 | chr2:179,390,717-179,672,150 | AX-156285341 |
| TTN | rs201611599 | chr2:179,390,717-179,672,150 | AX-96642598  |
| TTN | ---         | chr2:179,390,717-179,672,150 | AX-156286187 |
| TTN | ---         | chr2:179,390,717-179,672,150 | AX-96635479  |
| TTN | rs28653157  | chr2:179,390,717-179,672,150 | AX-13767792  |
| TTN | rs56310931  | chr2:179,390,717-179,672,150 | AX-13767793  |
| TTN | rs190721759 | chr2:179,390,717-179,672,150 | AX-83216922  |
| TTN | rs72648221  | chr2:179,390,717-179,672,150 | AX-83561385  |
| TTN | rs73036373  | chr2:179,390,717-179,672,150 | AX-13767796  |
| TTN | rs201348580 | chr2:179,390,717-179,672,150 | AX-83493298  |
| TTN | rs2366751   | chr2:179,390,717-179,672,150 | AX-11387461  |
| TTN | rs3829746   | chr2:179,390,717-179,672,150 | AX-13767798  |
| TTN | rs185002960 | chr2:179,390,717-179,672,150 | AX-83070822  |
| TTN | rs201422612 | chr2:179,390,717-179,672,150 | AX-83566606  |
| TTN | rs11896637  | chr2:179,390,717-179,672,150 | AX-40776719  |
| TTN | rs55634791  | chr2:179,390,717-179,672,150 | AX-83410833  |
| TTN | rs201158906 | chr2:179,390,717-179,672,150 | AX-83020696  |
| TTN | rs201958805 | chr2:179,390,717-179,672,150 | AX-83390752  |
| TTN | rs56214710  | chr2:179,390,717-179,672,150 | AX-13767804  |
| TTN | rs186273940 | chr2:179,390,717-179,672,150 | AX-82897371  |
| TTN | rs3813247   | chr2:179,390,717-179,672,150 | AX-11482706  |
| TTN | rs79926414  | chr2:179,390,717-179,672,150 | AX-13767805  |
| TTN | ---         | chr2:179,390,717-179,672,150 | AX-11476502  |

|     |             |                              |              |
|-----|-------------|------------------------------|--------------|
| TTN | ---         | chr2:179,390,717-179,672,150 | AX-33413183  |
| TTN | rs3731745   | chr2:179,390,717-179,672,150 | AX-40776723  |
| TTN | rs369019463 | chr2:179,390,717-179,672,150 | AX-91985246  |
| TTN | rs72648206  | chr2:179,390,717-179,672,150 | AX-83129627  |
| TTN | ---         | chr2:179,390,717-179,672,150 | AX-13767809  |
| TTN | rs12463674  | chr2:179,390,717-179,672,150 | AX-40776727  |
| TTN | rs56018860  | chr2:179,390,717-179,672,150 | AX-13767810  |
| TTN | rs3813246   | chr2:179,390,717-179,672,150 | AX-11482705  |
| TTN | rs3813245   | chr2:179,390,717-179,672,150 | AX-13767811  |
| TTN | rs3813243   | chr2:179,390,717-179,672,150 | AX-40776731  |
| TTN | ---         | chr2:179,390,717-179,672,150 | AX-86693270  |
| TTN | rs142453163 | chr2:179,390,717-179,672,150 | AX-83241097  |
| TTN | rs6732060   | chr2:179,390,717-179,672,150 | AX-11581492  |
| TTN | rs201512527 | chr2:179,390,717-179,672,150 | AX-83271403  |
| TTN | rs744426    | chr2:179,390,717-179,672,150 | AX-13767813  |
| TTN | rs72646898  | chr2:179,390,717-179,672,150 | AX-83571570  |
| TTN | rs55762754  | chr2:179,390,717-179,672,150 | AX-83320010  |
| TTN | rs56201325  | chr2:179,390,717-179,672,150 | AX-83043549  |
| TTN | rs56399205  | chr2:179,390,717-179,672,150 | AX-82930880  |
| TTN | rs10164753  | chr2:179,390,717-179,672,150 | AX-11097002  |
| TTN | rs55837610  | chr2:179,390,717-179,672,150 | AX-83064948  |
| TTN | rs12464787  | chr2:179,390,717-179,672,150 | AX-11208034  |
| TTN | ---         | chr2:179,390,717-179,672,150 | AX-90049730  |
| TTN | rs201043950 | chr2:179,390,717-179,672,150 | AX-83172795  |
| TTN | rs72646885  | chr2:179,390,717-179,672,150 | AX-83414902  |
| TTN | rs67041405  | chr2:179,390,717-179,672,150 | AX-33413207  |
| TTN | rs72646881  | chr2:179,390,717-179,672,150 | AX-33413209  |
| TTN | rs55980498  | chr2:179,390,717-179,672,150 | AX-82917783  |
| TTN | rs199506676 | chr2:179,390,717-179,672,150 | AX-83576915  |
| TTN | ---         | chr2:179,390,717-179,672,150 | AX-83138570  |
| TTN | ---         | chr2:179,390,717-179,672,150 | AX-86598984  |
| TTN | rs3769864   | chr2:179,390,717-179,672,150 | AX-113406023 |
| TTN | rs10497517  | chr2:179,390,717-179,672,150 | AX-11111534  |
| TTN | rs2288571   | chr2:179,390,717-179,672,150 | AX-40776741  |
| TTN | rs2288570   | chr2:179,390,717-179,672,150 | AX-40776743  |
| TTN | rs72646873  | chr2:179,390,717-179,672,150 | AX-83528863  |
| TTN | rs2303838   | chr2:179,390,717-179,672,150 | AX-13767821  |
| TTN | rs72646869  | chr2:179,390,717-179,672,150 | AX-50339928  |
| TTN | rs183276016 | chr2:179,390,717-179,672,150 | AX-83507981  |
| TTN | rs4894029   | chr2:179,390,717-179,672,150 | AX-11534158  |
| TTN | rs72646866  | chr2:179,390,717-179,672,150 | AX-90041790  |
| TTN | ---         | chr2:179,390,717-179,672,150 | AX-86712695  |
| TTN | rs16866400  | chr2:179,390,717-179,672,150 | AX-13767828  |
| TTN | rs13021201  | chr2:179,390,717-179,672,150 | AX-11236327  |
| TTN | rs72646861  | chr2:179,390,717-179,672,150 | AX-33413217  |
| TTN | rs150661999 | chr2:179,390,717-179,672,150 | AX-83006042  |
| TTN | rs181717727 | chr2:179,390,717-179,672,150 | AX-82949451  |
| TTN | rs2042996   | chr2:179,390,717-179,672,150 | AX-13767831  |
| TTN | rs1007025   | chr2:179,390,717-179,672,150 | AX-13767832  |
| TTN | rs72646857  | chr2:179,390,717-179,672,150 | AX-13767833  |
| TTN | rs72646855  | chr2:179,390,717-179,672,150 | AX-83425810  |
| TTN | rs72646850  | chr2:179,390,717-179,672,150 | AX-33413225  |
| TTN | rs200689750 | chr2:179,390,717-179,672,150 | AX-83250208  |
| TTN | ---         | chr2:179,390,717-179,672,150 | AX-86663161  |
| TTN | rs1560221   | chr2:179,390,717-179,672,150 | AX-40776747  |

|     |             |                              |              |
|-----|-------------|------------------------------|--------------|
| TTN | rs199895260 | chr2:179,390,717-179,672,150 | AX-82901253  |
| TTN | rs2163009   | chr2:179,390,717-179,672,150 | AX-11371623  |
| TTN | rs141973925 | chr2:179,390,717-179,672,150 | AX-83251414  |
| TTN | rs72646845  | chr2:179,390,717-179,672,150 | AX-83133177  |
| TTN | rs200212521 | chr2:179,390,717-179,672,150 | AX-83253796  |
| TTN | rs201487340 | chr2:179,390,717-179,672,150 | AX-83205832  |
| TTN | rs16866406  | chr2:179,390,717-179,672,150 | AX-13767839  |
| TTN | rs72646841  | chr2:179,390,717-179,672,150 | AX-33413231  |
| TTN | rs72646840  | chr2:179,390,717-179,672,150 | AX-83132796  |
| TTN | rs72646838  | chr2:179,390,717-179,672,150 | AX-86713488  |
| TTN | rs2288569   | chr2:179,390,717-179,672,150 | AX-83136669  |
| TTN | rs62178962  | chr2:179,390,717-179,672,150 | AX-96640833  |
| TTN | rs4894030   | chr2:179,390,717-179,672,150 | AX-13767841  |
| TTN | rs28378468  | chr2:179,390,717-179,672,150 | AX-33413241  |
| TTN | rs6712785   | chr2:179,390,717-179,672,150 | AX-148108649 |
| TTN | rs6712785   | chr2:179,390,717-179,672,150 | AX-156273125 |
| TTN | rs188185141 | chr2:179,390,717-179,672,150 | AX-83528634  |
| TTN | rs35833641  | chr2:179,390,717-179,672,150 | AX-13767846  |
| TTN | rs200001206 | chr2:179,390,717-179,672,150 | AX-83027647  |
| TTN | rs377000174 | chr2:179,390,717-179,672,150 | AX-90061944  |
| TTN | rs1001238   | chr2:179,390,717-179,672,150 | AX-11087300  |
| TTN | rs13009158  | chr2:179,390,717-179,672,150 | AX-13767849  |
| TTN | rs72646823  | chr2:179,390,717-179,672,150 | AX-83063011  |
| TTN | rs76226740  | chr2:179,390,717-179,672,150 | AX-33413259  |
| TTN | rs201412693 | chr2:179,390,717-179,672,150 | AX-83416855  |
| TTN | rs72646817  | chr2:179,390,717-179,672,150 | AX-156286028 |
| TTN | rs10497518  | chr2:179,390,717-179,672,150 | AX-11111535  |
| TTN | rs2303834   | chr2:179,390,717-179,672,150 | AX-12525349  |
| TTN | rs2303833   | chr2:179,390,717-179,672,150 | AX-33413263  |
| TTN | rs80098281  | chr2:179,390,717-179,672,150 | AX-13767857  |
| TTN | rs72646809  | chr2:179,390,717-179,672,150 | AX-13767858  |
| TTN | rs2303832   | chr2:179,390,717-179,672,150 | AX-40776761  |
| TTN | rs185913848 | chr2:179,390,717-179,672,150 | AX-83557702  |
| TTN | ---         | chr2:179,390,717-179,672,150 | AX-83095539  |
| TTN | rs201213901 | chr2:179,390,717-179,672,150 | AX-83527583  |
| TTN | rs200650668 | chr2:179,390,717-179,672,150 | AX-83086734  |
| TTN | rs16866412  | chr2:179,390,717-179,672,150 | AX-11285029  |
| TTN | rs191539637 | chr2:179,390,717-179,672,150 | AX-83594719  |
| TTN | rs36043230  | chr2:179,390,717-179,672,150 | AX-51297476  |
| TTN | rs202094100 | chr2:179,390,717-179,672,150 | AX-83133903  |
| TTN | rs72677243  | chr2:179,390,717-179,672,150 | AX-83259147  |
| TTN | rs16866416  | chr2:179,390,717-179,672,150 | AX-156265642 |
| TTN | rs16866416  | chr2:179,390,717-179,672,150 | AX-156265677 |
| TTN | rs202141158 | chr2:179,390,717-179,672,150 | AX-83028698  |
| TTN | rs72677237  | chr2:179,390,717-179,672,150 | AX-83469909  |
| TTN | rs3835071   | chr2:179,390,717-179,672,150 | AX-13767873  |
| TTN | rs3835071   | chr2:179,390,717-179,672,150 | AX-96638658  |
| TTN | rs72677235  | chr2:179,390,717-179,672,150 | AX-91990524  |
| TTN | rs72677235  | chr2:179,390,717-179,672,150 | AX-92015651  |
| TTN | rs146181477 | chr2:179,390,717-179,672,150 | AX-83427506  |
| TTN | rs72677233  | chr2:179,390,717-179,672,150 | AX-82913695  |
| TTN | rs72677232  | chr2:179,390,717-179,672,150 | AX-83221336  |
| TTN | rs72677231  | chr2:179,390,717-179,672,150 | AX-82920594  |
| TTN | rs201717871 | chr2:179,390,717-179,672,150 | AX-83418675  |
| TTN | ---         | chr2:179,390,717-179,672,150 | AX-90065945  |

|     |             |                              |              |
|-----|-------------|------------------------------|--------------|
| TTN | rs72677225  | chr2:179,390,717-179,672,150 | AX-33413283  |
| TTN | rs17354992  | chr2:179,390,717-179,672,150 | AX-11320928  |
| TTN | rs12693162  | chr2:179,390,717-179,672,150 | AX-13767883  |
| TTN | rs1017323   | chr2:179,390,717-179,672,150 | AX-11097525  |
| TTN | rs12614435  | chr2:179,390,717-179,672,150 | AX-40776771  |
| TTN | rs12988307  | chr2:179,390,717-179,672,150 | AX-92737707  |
| TTN | rs12988307  | chr2:179,390,717-179,672,150 | AX-96640255  |
| TTN | rs36113194  | chr2:179,390,717-179,672,150 | AX-156291063 |
| TTN | rs16866418  | chr2:179,390,717-179,672,150 | AX-96558798  |
| TTN | rs16866418  | chr2:179,390,717-179,672,150 | AX-96642367  |
| TTN | rs16866420  | chr2:179,390,717-179,672,150 | AX-84615666  |
| TTN | rs16866420  | chr2:179,390,717-179,672,150 | AX-84627283  |
| TTN | rs192766485 | chr2:179,390,717-179,672,150 | AX-83241875  |
| TTN | rs56034831  | chr2:179,390,717-179,672,150 | AX-33413305  |
| TTN | rs6723526   | chr2:179,390,717-179,672,150 | AX-11580845  |
| TTN | ---         | chr2:179,390,717-179,672,150 | AX-12475297  |
| TTN | rs7590037   | chr2:179,390,717-179,672,150 | AX-40776783  |
| TTN | rs2288563   | chr2:179,390,717-179,672,150 | AX-11382040  |
| TTN | ---         | chr2:179,390,717-179,672,150 | AX-86699306  |
| TTN | rs201257644 | chr2:179,390,717-179,672,150 | AX-83397539  |
| TTN | rs201944202 | chr2:179,390,717-179,672,150 | AX-83508576  |
| TTN | rs34659500  | chr2:179,390,717-179,672,150 | AX-12553290  |
| TTN | rs185968622 | chr2:179,390,717-179,672,150 | AX-92572252  |
| TTN | rs1469473   | chr2:179,390,717-179,672,150 | AX-40776797  |
| TTN | rs2562845   | chr2:179,390,717-179,672,150 | AX-13767905  |
| TTN | rs72650066  | chr2:179,390,717-179,672,150 | AX-33413335  |
| TTN | rs148140756 | chr2:179,390,717-179,672,150 | AX-83374461  |
| TTN | rs1429094   | chr2:179,390,717-179,672,150 | AX-33413339  |
| TTN | rs72650064  | chr2:179,390,717-179,672,150 | AX-83364865  |
| TTN | rs116792417 | chr2:179,390,717-179,672,150 | AX-91983601  |
| TTN | rs116792417 | chr2:179,390,717-179,672,150 | AX-92008728  |
| TTN | rs139167585 | chr2:179,390,717-179,672,150 | AX-96553384  |
| TTN | rs139167585 | chr2:179,390,717-179,672,150 | AX-96636953  |
| TTN | rs2163008   | chr2:179,390,717-179,672,150 | AX-96715761  |
| TTN | rs2163008   | chr2:179,390,717-179,672,150 | AX-96725973  |
| TTN | rs2562848   | chr2:179,390,717-179,672,150 | AX-11398636  |
| TTN | rs10221760  | chr2:179,390,717-179,672,150 | AX-40776813  |
| TTN | rs12998857  | chr2:179,390,717-179,672,150 | AX-96557230  |
| TTN | rs12998857  | chr2:179,390,717-179,672,150 | AX-96640799  |
| TTN | rs202014478 | chr2:179,390,717-179,672,150 | AX-83027103  |
| TTN | rs377319699 | chr2:179,390,717-179,672,150 | AX-86563304  |
| TTN | ---         | chr2:179,390,717-179,672,150 | AX-86592714  |
| TTN | rs577363824 | chr2:179,390,717-179,672,150 | AX-86590361  |
| TTN | rs140640738 | chr2:179,390,717-179,672,150 | AX-83012719  |
| TTN | rs2472751   | chr2:179,390,717-179,672,150 | AX-13767930  |
| TTN | rs71023451  | chr2:179,390,717-179,672,150 | AX-96549783  |
| TTN | rs71023451  | chr2:179,390,717-179,672,150 | AX-96633352  |
| TTN | rs62178972  | chr2:179,390,717-179,672,150 | AX-96552325  |
| TTN | rs62178972  | chr2:179,390,717-179,672,150 | AX-96635894  |
| TTN | rs2742351   | chr2:179,390,717-179,672,150 | AX-13767935  |
| TTN | rs2742349   | chr2:179,390,717-179,672,150 | AX-13767937  |
| TTN | rs186084940 | chr2:179,390,717-179,672,150 | AX-88748799  |
| TTN | rs186084940 | chr2:179,390,717-179,672,150 | AX-88791844  |
| TTN | rs35112591  | chr2:179,390,717-179,672,150 | AX-13767939  |
| TTN | ---         | chr2:179,390,717-179,672,150 | AX-86676185  |

|     |             |                              |              |
|-----|-------------|------------------------------|--------------|
| TTN | ---         | chr2:179,390,717-179,672,150 | AX-82954024  |
| TTN | rs36051007  | chr2:179,390,717-179,672,150 | AX-11474292  |
| TTN | ---         | chr2:179,390,717-179,672,150 | AX-86662140  |
| TTN | rs115744476 | chr2:179,390,717-179,672,150 | AX-37942967  |
| TTN | rs72650034  | chr2:179,390,717-179,672,150 | AX-82913023  |
| TTN | rs2303828   | chr2:179,390,717-179,672,150 | AX-156273127 |
| TTN | rs2303828   | chr2:179,390,717-179,672,150 | AX-156291064 |
| TTN | rs116676813 | chr2:179,390,717-179,672,150 | AX-13767950  |
| TTN | rs72650031  | chr2:179,390,717-179,672,150 | AX-83151113  |
| TTN | ---         | chr2:179,390,717-179,672,150 | AX-90081259  |
| TTN | rs2627038   | chr2:179,390,717-179,672,150 | AX-13767954  |
| TTN | rs2244492   | chr2:179,390,717-179,672,150 | AX-11378152  |
| TTN | rs145387989 | chr2:179,390,717-179,672,150 | AX-86619950  |
| TTN | rs372371333 | chr2:179,390,717-179,672,150 | AX-86580609  |
| TTN | rs2255167   | chr2:179,390,717-179,672,150 | AX-156273128 |
| TTN | rs2255167   | chr2:179,390,717-179,672,150 | AX-96633997  |
| TTN | rs2042995   | chr2:179,390,717-179,672,150 | AX-11362540  |
| TTN | rs73038323  | chr2:179,390,717-179,672,150 | AX-13767959  |
| TTN | rs73038324  | chr2:179,390,717-179,672,150 | AX-13767960  |
| TTN | rs16866439  | chr2:179,390,717-179,672,150 | AX-96549018  |
| TTN | rs16866439  | chr2:179,390,717-179,672,150 | AX-96632587  |
| TTN | rs6755456   | chr2:179,390,717-179,672,150 | AX-96638492  |
| TTN | rs3045696   | chr2:179,390,717-179,672,150 | AX-151129218 |
| TTN | rs113059495 | chr2:179,390,717-179,672,150 | AX-156278753 |
| TTN | rs112088511 | chr2:179,390,717-179,672,150 | AX-151360692 |
| TTN | rs112088511 | chr2:179,390,717-179,672,150 | AX-156278754 |
| TTN | rs73038328  | chr2:179,390,717-179,672,150 | AX-13767963  |
| TTN | rs141526230 | chr2:179,390,717-179,672,150 | AX-119621894 |
| TTN | rs141526230 | chr2:179,390,717-179,672,150 | AX-96552865  |
| TTN | rs16866440  | chr2:179,390,717-179,672,150 | AX-33413395  |
| TTN | rs2251987   | chr2:179,390,717-179,672,150 | AX-40776843  |
| TTN | rs72650011  | chr2:179,390,717-179,672,150 | AX-82891029  |
| TTN | rs2366753   | chr2:179,390,717-179,672,150 | AX-40776845  |
| TTN | rs16866442  | chr2:179,390,717-179,672,150 | AX-13767966  |
| TTN | rs2742345   | chr2:179,390,717-179,672,150 | AX-11408568  |
| TTN | rs72953397  | chr2:179,390,717-179,672,150 | AX-13767968  |
| TTN | rs72650006  | chr2:179,390,717-179,672,150 | AX-33413417  |
| TTN | rs2742343   | chr2:179,390,717-179,672,150 | AX-13767970  |
| TTN | ---         | chr2:179,390,717-179,672,150 | AX-86606851  |
| TTN | rs371163094 | chr2:179,390,717-179,672,150 | AX-94355365  |
| TTN | ---         | chr2:179,390,717-179,672,150 | AX-90055163  |
| TTN | rs4893852   | chr2:179,390,717-179,672,150 | AX-11534139  |
| TTN | rs10203085  | chr2:179,390,717-179,672,150 | AX-33413423  |
| TTN | rs77643383  | chr2:179,390,717-179,672,150 | AX-33413425  |
| TTN | rs76465131  | chr2:179,390,717-179,672,150 | AX-33413429  |
| TTN | rs2742332   | chr2:179,390,717-179,672,150 | AX-13767980  |
| TTN | rs72648998  | chr2:179,390,717-179,672,150 | AX-13767982  |
| TTN | rs12997957  | chr2:179,390,717-179,672,150 | AX-13767984  |
| TTN | rs2742331   | chr2:179,390,717-179,672,150 | AX-156273129 |
| TTN | rs2742331   | chr2:179,390,717-179,672,150 | AX-156291065 |
| TTN | rs72648996  | chr2:179,390,717-179,672,150 | AX-90070678  |
| TTN | rs201229221 | chr2:179,390,717-179,672,150 | AX-92024826  |
| TTN | rs72648994  | chr2:179,390,717-179,672,150 | AX-83048346  |
| TTN | rs199557654 | chr2:179,390,717-179,672,150 | AX-83194254  |
| TTN | rs72648992  | chr2:179,390,717-179,672,150 | AX-33413437  |



|     |             |                              |              |
|-----|-------------|------------------------------|--------------|
| TTN | rs13398235  | chr2:179,390,717-179,672,150 | AX-11252542  |
| TTN | rs2562839   | chr2:179,390,717-179,672,150 | AX-13767986  |
| TTN | rs72648990  | chr2:179,390,717-179,672,150 | AX-83035926  |
| TTN | rs72648989  | chr2:179,390,717-179,672,150 | AX-83370588  |
| TTN | rs12693164  | chr2:179,390,717-179,672,150 | AX-11223524  |
| TTN | rs2562838   | chr2:179,390,717-179,672,150 | AX-13767987  |
| TTN | rs2562836   | chr2:179,390,717-179,672,150 | AX-40776867  |
| TTN | rs72648987  | chr2:179,390,717-179,672,150 | AX-33413439  |
| TTN | rs12622914  | chr2:179,390,717-179,672,150 | AX-96642962  |
| TTN | rs10183237  | chr2:179,390,717-179,672,150 | AX-40776871  |
| TTN | rs200355367 | chr2:179,390,717-179,672,150 | AX-83011791  |
| TTN | rs10183361  | chr2:179,390,717-179,672,150 | AX-156265668 |
| TTN | rs10183361  | chr2:179,390,717-179,672,150 | AX-156265703 |
| TTN | rs2562834   | chr2:179,390,717-179,672,150 | AX-11398635  |
| TTN | rs2562833   | chr2:179,390,717-179,672,150 | AX-156281479 |
| TTN | rs2562833   | chr2:179,390,717-179,672,150 | AX-96641311  |
| TTN | rs2562832   | chr2:179,390,717-179,672,150 | AX-11398634  |
| TTN | rs149855485 | chr2:179,390,717-179,672,150 | AX-83106673  |
| TTN | rs72648986  | chr2:179,390,717-179,672,150 | AX-13767992  |
| TTN | rs62178977  | chr2:179,390,717-179,672,150 | AX-13767993  |
| TTN | rs13390491  | chr2:179,390,717-179,672,150 | AX-11252170  |
| TTN | rs2627043   | chr2:179,390,717-179,672,150 | AX-11402136  |
| TTN | rs6750145   | chr2:179,390,717-179,672,150 | AX-40776875  |
| TTN | rs72648984  | chr2:179,390,717-179,672,150 | AX-83250659  |
| TTN | rs201571580 | chr2:179,390,717-179,672,150 | AX-83251898  |
| TTN | rs200103997 | chr2:179,390,717-179,672,150 | AX-83328482  |
| TTN | rs72648981  | chr2:179,390,717-179,672,150 | AX-83248400  |
| TTN | rs72648978  | chr2:179,390,717-179,672,150 | AX-33413441  |
| TTN | rs62178978  | chr2:179,390,717-179,672,150 | AX-116090842 |
| TTN | rs62178978  | chr2:179,390,717-179,672,150 | AX-156265694 |
| TTN | rs16866465  | chr2:179,390,717-179,672,150 | AX-11285037  |
| TTN | rs373060681 | chr2:179,390,717-179,672,150 | AX-86595432  |
| TTN | rs149523263 | chr2:179,390,717-179,672,150 | AX-83119994  |
| TTN | rs72648972  | chr2:179,390,717-179,672,150 | AX-82968895  |
| TTN | rs17452588  | chr2:179,390,717-179,672,150 | AX-11324806  |
| TTN | rs2562830   | chr2:179,390,717-179,672,150 | AX-13767998  |
| TTN | ---         | chr2:179,390,717-179,672,150 | AX-33413445  |
| TTN | rs72648969  | chr2:179,390,717-179,672,150 | AX-83360693  |
| TTN | rs201065037 | chr2:179,390,717-179,672,150 | AX-83230235  |
| TTN | ---         | chr2:179,390,717-179,672,150 | AX-94375769  |
| TTN | ---         | chr2:179,390,717-179,672,150 | AX-13768000  |
| TTN | rs16866473  | chr2:179,390,717-179,672,150 | AX-13768001  |
| TTN | rs2742327   | chr2:179,390,717-179,672,150 | AX-13768002  |
| TTN | rs189951108 | chr2:179,390,717-179,672,150 | AX-83077632  |
| TTN | rs72648964  | chr2:179,390,717-179,672,150 | AX-83260221  |
| TTN | rs72648962  | chr2:179,390,717-179,672,150 | AX-13768003  |
| TTN | rs72648960  | chr2:179,390,717-179,672,150 | AX-13768004  |
| TTN | rs17355446  | chr2:179,390,717-179,672,150 | AX-11320948  |
| TTN | ---         | chr2:179,390,717-179,672,150 | AX-83128474  |
| TTN | rs200866883 | chr2:179,390,717-179,672,150 | AX-83140464  |
| TTN | rs17355460  | chr2:179,390,717-179,672,150 | AX-11320950  |
| TTN | rs149470241 | chr2:179,390,717-179,672,150 | AX-83112026  |
| TTN | rs2129110   | chr2:179,390,717-179,672,150 | AX-13768009  |
| TTN | rs146627500 | chr2:179,390,717-179,672,150 | AX-83469437  |
| TTN | ---         | chr2:179,390,717-179,672,150 | AX-90051967  |

|     |             |                              |              |
|-----|-------------|------------------------------|--------------|
| TTN | rs2627042   | chr2:179,390,717-179,672,150 | AX-107765093 |
| TTN | rs2627042   | chr2:179,390,717-179,672,150 | AX-147949060 |
| TTN | rs11888217  | chr2:179,390,717-179,672,150 | AX-11180475  |
| TTN | rs72648954  | chr2:179,390,717-179,672,150 | AX-13768014  |
| TTN | rs72648953  | chr2:179,390,717-179,672,150 | AX-82973641  |
| TTN | rs184412722 | chr2:179,390,717-179,672,150 | AX-82919902  |
| TTN | rs72648949  | chr2:179,390,717-179,672,150 | AX-82901938  |
| TTN | rs200359082 | chr2:179,390,717-179,672,150 | AX-83345383  |
| TTN | rs72648947  | chr2:179,390,717-179,672,150 | AX-83026558  |
| TTN | rs17076     | chr2:179,390,717-179,672,150 | AX-13768017  |
| TTN | rs146983095 | chr2:179,390,717-179,672,150 | AX-83002824  |
| TTN | rs72648943  | chr2:179,390,717-179,672,150 | AX-83531619  |
| TTN | rs72648942  | chr2:179,390,717-179,672,150 | AX-83161670  |
| TTN | ---         | chr2:179,390,717-179,672,150 | AX-90043694  |
| TTN | rs72648940  | chr2:179,390,717-179,672,150 | AX-83489194  |
| TTN | rs190636272 | chr2:179,390,717-179,672,150 | AX-83063597  |
| TTN | rs72648937  | chr2:179,390,717-179,672,150 | AX-33413467  |
| TTN | rs72648930  | chr2:179,390,717-179,672,150 | AX-82895334  |
| TTN | rs72648927  | chr2:179,390,717-179,672,150 | AX-33413479  |
| TTN | rs72648925  | chr2:179,390,717-179,672,150 | AX-83392571  |
| TTN | rs72648923  | chr2:179,390,717-179,672,150 | AX-82932952  |
| TTN | rs2742347   | chr2:179,390,717-179,672,150 | AX-11408569  |
| TTN | rs2627041   | chr2:179,390,717-179,672,150 | AX-33413485  |
| TTN | rs2627040   | chr2:179,390,717-179,672,150 | AX-40776905  |
| TTN | rs73038347  | chr2:179,390,717-179,672,150 | AX-156279695 |
| TTN | rs73038347  | chr2:179,390,717-179,672,150 | AX-156295311 |
| TTN | rs147879266 | chr2:179,390,717-179,672,150 | AX-86674087  |
| TTN | ---         | chr2:179,390,717-179,672,150 | AX-86737890  |
| TTN | rs200204761 | chr2:179,390,717-179,672,150 | AX-83118190  |
| TTN | rs55857742  | chr2:179,390,717-179,672,150 | AX-83406858  |
| TTN | rs1883085   | chr2:179,390,717-179,672,150 | AX-11349830  |
| TTN | rs2562829   | chr2:179,390,717-179,672,150 | AX-11398633  |
| TTN | rs267607158 | chr2:179,390,717-179,672,150 | AX-90029644  |
| TTN | ---         | chr2:179,390,717-179,672,150 | AX-37942971  |
| TTN | rs201437752 | chr2:179,390,717-179,672,150 | AX-83529645  |
| TTN | rs34618570  | chr2:179,390,717-179,672,150 | AX-83262280  |
| TTN | rs34070843  | chr2:179,390,717-179,672,150 | AX-11440660  |
| TTN | rs33971253  | chr2:179,390,717-179,672,150 | AX-83266682  |
| TTN | ---         | chr2:179,390,717-179,672,150 | AX-86711124  |
| TTN | rs2627037   | chr2:179,390,717-179,672,150 | AX-11402135  |
| TTN | rs59479297  | chr2:179,390,717-179,672,150 | AX-13768031  |
| TTN | rs11893580  | chr2:179,390,717-179,672,150 | AX-156273130 |
| TTN | rs11884172  | chr2:179,390,717-179,672,150 | AX-40776915  |
| TTN | rs72648915  | chr2:179,390,717-179,672,150 | AX-13768045  |
| TTN | rs145183384 | chr2:179,390,717-179,672,150 | AX-83269285  |
| TTN | rs201273719 | chr2:179,390,717-179,672,150 | AX-86679726  |
| TTN | rs72648913  | chr2:179,390,717-179,672,150 | AX-83277609  |
| TTN | ---         | chr2:179,390,717-179,672,150 | AX-86707547  |
| TTN | ---         | chr2:179,390,717-179,672,150 | AX-94359020  |
| TTN | ---         | chr2:179,390,717-179,672,150 | AX-94359021  |
| TTN | rs62179016  | chr2:179,390,717-179,672,150 | AX-83588239  |
| TTN | rs72648911  | chr2:179,390,717-179,672,150 | AX-13768046  |
| TTN | rs66677602  | chr2:179,390,717-179,672,150 | AX-13768047  |
| TTN | rs142973956 | chr2:179,390,717-179,672,150 | AX-82921066  |
| TTN | rs72648910  | chr2:179,390,717-179,672,150 | AX-13768049  |

|     |             |                              |              |
|-----|-------------|------------------------------|--------------|
| TTN | ---         | chr2:179,390,717-179,672,150 | AX-90042886  |
| TTN | rs61233923  | chr2:179,390,717-179,672,150 | AX-91991396  |
| TTN | rs61233923  | chr2:179,390,717-179,672,150 | AX-92016524  |
| TTN | ---         | chr2:179,390,717-179,672,150 | AX-86599834  |
| TTN | rs145581345 | chr2:179,390,717-179,672,150 | AX-83468569  |
| TTN | rs72648909  | chr2:179,390,717-179,672,150 | AX-83283355  |
| TTN | rs72648907  | chr2:179,390,717-179,672,150 | AX-33413515  |
| TTN | ---         | chr2:179,390,717-179,672,150 | AX-90079145  |
| TTN | rs150615457 | chr2:179,390,717-179,672,150 | AX-82998715  |
| TTN | ---         | chr2:179,390,717-179,672,150 | AX-86582212  |
| TTN | rs139486133 | chr2:179,390,717-179,672,150 | AX-82885211  |
| TTN | rs75785339  | chr2:179,390,717-179,672,150 | AX-13768050  |
| TTN | rs149748934 | chr2:179,390,717-179,672,150 | AX-83400839  |
| TTN | rs140909116 | chr2:179,390,717-179,672,150 | AX-83379313  |
| TTN | rs142304137 | chr2:179,390,717-179,672,150 | AX-83121849  |
| TTN | rs72647901  | chr2:179,390,717-179,672,150 | AX-83560405  |
| TTN | rs72647897  | chr2:179,390,717-179,672,150 | AX-83584191  |
| TTN | rs922984    | chr2:179,390,717-179,672,150 | AX-86332321  |
| TTN | rs922984    | chr2:179,390,717-179,672,150 | AX-86334397  |
| TTN | ---         | chr2:179,390,717-179,672,150 | AX-13768057  |
| TTN | ---         | chr2:179,390,717-179,672,150 | AX-86573121  |
| TTN | rs148115514 | chr2:179,390,717-179,672,150 | AX-83125806  |
| TTN | rs201047740 | chr2:179,390,717-179,672,150 | AX-83372864  |
| TTN | rs200284932 | chr2:179,390,717-179,672,150 | AX-83442275  |
| TTN | rs3754953   | chr2:179,390,717-179,672,150 | AX-156279701 |
| TTN | rs3754953   | chr2:179,390,717-179,672,150 | AX-156295317 |
| TTN | rs1484116   | chr2:179,390,717-179,672,150 | AX-156273131 |
| TTN | rs1484116   | chr2:179,390,717-179,672,150 | AX-156291067 |
| TTN | rs145167466 | chr2:179,390,717-179,672,150 | AX-96558905  |
| TTN | rs200064770 | chr2:179,390,717-179,672,150 | AX-96550642  |
| TTN | rs1484118   | chr2:179,390,717-179,672,150 | AX-11267887  |
| TTN | rs7585334   | chr2:179,390,717-179,672,150 | AX-11631625  |
| TTN | ---         | chr2:179,390,717-179,672,150 | AX-86573284  |
| TTN | ---         | chr2:179,390,717-179,672,150 | AX-86689202  |
| TTN | rs72955213  | chr2:179,390,717-179,672,150 | AX-33413537  |
| TTN | rs371596417 | chr2:179,390,717-179,672,150 | AX-86709576  |
| TTN | rs2291310   | chr2:179,390,717-179,672,150 | AX-11382381  |
| TTN | ---         | chr2:179,390,717-179,672,150 | AX-94359022  |
| TTN | rs7600001   | chr2:179,390,717-179,672,150 | AX-12633561  |
| TTN | rs73038360  | chr2:179,390,717-179,672,150 | AX-13768078  |
| TTN | rs7604033   | chr2:179,390,717-179,672,150 | AX-13768079  |
| TTN | rs35770984  | chr2:179,390,717-179,672,150 | AX-13768080  |
| TTN | rs7572955   | chr2:179,390,717-179,672,150 | AX-40776945  |
| TTN | rs4894042   | chr2:179,390,717-179,672,150 | AX-156273132 |
| TTN | rs4894042   | chr2:179,390,717-179,672,150 | AX-156291068 |
| TTN | rs7559166   | chr2:179,390,717-179,672,150 | AX-11629735  |
| TTN | rs35168948  | chr2:179,390,717-179,672,150 | AX-156284673 |
| TTN | rs115985443 | chr2:179,390,717-179,672,150 | AX-37942979  |
| TTN | rs34819099  | chr2:179,390,717-179,672,150 | AX-11453503  |
| TTN | rs2291311   | chr2:179,390,717-179,672,150 | AX-11382382  |
| TTN | rs2291312   | chr2:179,390,717-179,672,150 | AX-13768089  |
| TTN | rs149755500 | chr2:179,390,717-179,672,150 | AX-82989493  |
| TTN | rs3816782   | chr2:179,390,717-179,672,150 | AX-96551684  |
| TTN | rs3816782   | chr2:179,390,717-179,672,150 | AX-96635253  |
| TTN | rs4894044   | chr2:179,390,717-179,672,150 | AX-40776955  |

|     |             |                              |              |
|-----|-------------|------------------------------|--------------|
| TTN | rs4893853   | chr2:179,390,717-179,672,150 | AX-11534140  |
| TTN | rs72647894  | chr2:179,390,717-179,672,150 | AX-83451603  |
| TTN | rs2291313   | chr2:179,390,717-179,672,150 | AX-12524600  |
| TTN | rs4471922   | chr2:179,390,717-179,672,150 | AX-13768092  |
| TTN | ---         | chr2:179,390,717-179,672,150 | AX-90078725  |
| TTN | rs72647884  | chr2:179,390,717-179,672,150 | AX-90070676  |
| TTN | rs375549179 | chr2:179,390,717-179,672,150 | AX-92009462  |
| TTN | rs2306636   | chr2:179,390,717-179,672,150 | AX-11384059  |
| TTN | rs33917087  | chr2:179,390,717-179,672,150 | AX-82967329  |
| TTN | rs556908341 | chr2:179,390,717-179,672,150 | AX-94359023  |
| TTN | rs4893854   | chr2:179,390,717-179,672,150 | AX-13768095  |
| TTN | rs4894047   | chr2:179,390,717-179,672,150 | AX-156273133 |
| TTN | rs4894047   | chr2:179,390,717-179,672,150 | AX-156291069 |
| TTN | ---         | chr2:179,390,717-179,672,150 | AX-90044204  |
| TTN | rs1905521   | chr2:179,390,717-179,672,150 | AX-96557849  |
| TTN | rs1905521   | chr2:179,390,717-179,672,150 | AX-96641418  |
| TTN | ---         | chr2:179,390,717-179,672,150 | AX-33413569  |
| TTN | rs2291306   | chr2:179,390,717-179,672,150 | AX-12524599  |
| TTN | rs146970027 | chr2:179,390,717-179,672,150 | AX-83271288  |
| TTN | rs4894048   | chr2:179,390,717-179,672,150 | AX-11534159  |
| TTN | ---         | chr2:179,390,717-179,672,150 | AX-94375774  |
| TTN | rs3816781   | chr2:179,390,717-179,672,150 | AX-40776967  |
| TTN | rs4894049   | chr2:179,390,717-179,672,150 | AX-13768099  |
| TTN | rs189149543 | chr2:179,390,717-179,672,150 | AX-83552914  |
| TTN | rs146496197 | chr2:179,390,717-179,672,150 | AX-83251265  |
| TTN | rs141213991 | chr2:179,390,717-179,672,150 | AX-82949183  |
| TTN | rs12476289  | chr2:179,390,717-179,672,150 | AX-83045848  |
| TTN | rs719201    | chr2:179,390,717-179,672,150 | AX-12624057  |
| TTN | ---         | chr2:179,390,717-179,672,150 | AX-83521160  |
| TTN | rs56180285  | chr2:179,390,717-179,672,150 | AX-13768105  |
| TTN | rs72647873  | chr2:179,390,717-179,672,150 | AX-33413577  |
| TTN | rs16866531  | chr2:179,390,717-179,672,150 | AX-40776975  |
| TTN | rs36021856  | chr2:179,390,717-179,672,150 | AX-83306114  |
| TTN | rs2291301   | chr2:179,390,717-179,672,150 | AX-156265654 |
| TTN | rs2291301   | chr2:179,390,717-179,672,150 | AX-156265689 |
| TTN | rs1552280   | chr2:179,390,717-179,672,150 | AX-96716216  |
| TTN | rs1552280   | chr2:179,390,717-179,672,150 | AX-96726428  |
| TTN | rs2035496   | chr2:179,390,717-179,672,150 | AX-40776985  |
| TTN | rs6709235   | chr2:179,390,717-179,672,150 | AX-33413583  |
| TTN | rs150667217 | chr2:179,390,717-179,672,150 | AX-83229378  |
| TTN | rs10497520  | chr2:179,390,717-179,672,150 | AX-11111536  |
| TTN | rs12693168  | chr2:179,390,717-179,672,150 | AX-156273134 |
| TTN | rs12693168  | chr2:179,390,717-179,672,150 | AX-156291070 |
| TTN | rs2054708   | chr2:179,390,717-179,672,150 | AX-12515607  |
| TTN | rs72647870  | chr2:179,390,717-179,672,150 | AX-83308005  |
| TTN | rs2054707   | chr2:179,390,717-179,672,150 | AX-156273135 |
| TTN | rs2054707   | chr2:179,390,717-179,672,150 | AX-156291071 |
| TTN | rs2054706   | chr2:179,390,717-179,672,150 | AX-84615667  |
| TTN | rs2054706   | chr2:179,390,717-179,672,150 | AX-84627284  |
| TTN | rs55914517  | chr2:179,390,717-179,672,150 | AX-83064566  |
| TTN | rs142951505 | chr2:179,390,717-179,672,150 | AX-83225654  |
| TTN | ---         | chr2:179,390,717-179,672,150 | AX-90055164  |
| TTN | rs60305852  | chr2:179,390,717-179,672,150 | AX-156265669 |
| TTN | rs60305852  | chr2:179,390,717-179,672,150 | AX-156265704 |
| TTN | rs2306637   | chr2:179,390,717-179,672,150 | AX-156281482 |

|     |             |                              |              |
|-----|-------------|------------------------------|--------------|
| TTN | rs2306637   | chr2:179,390,717-179,672,150 | AX-156296423 |
| TTN | rs67143080  | chr2:179,390,717-179,672,150 | AX-121418904 |
| TTN | rs67143080  | chr2:179,390,717-179,672,150 | AX-96637421  |
| TTN | rs6729746   | chr2:179,390,717-179,672,150 | AX-33413593  |
| TTN | rs3769863   | chr2:179,390,717-179,672,150 | AX-11479323  |
| TTN | rs6733291   | chr2:179,390,717-179,672,150 | AX-40776997  |
| TTN | rs3835920   | chr2:179,390,717-179,672,150 | AX-88767258  |
| TTN | rs3835920   | chr2:179,390,717-179,672,150 | AX-88810303  |
| TTN | rs35813871  | chr2:179,390,717-179,672,150 | AX-33413599  |
| TTN | rs6715406   | chr2:179,390,717-179,672,150 | AX-11580276  |
| TTN | rs267607157 | chr2:179,390,717-179,672,150 | AX-90055165  |
| TTN | rs28933405  | chr2:179,390,717-179,672,150 | AX-88782118  |
| TTN | rs6715901   | chr2:179,390,717-179,672,150 | AX-11580309  |
| TTN | rs10497521  | chr2:179,390,717-179,672,150 | AX-40776999  |
| TTN | rs7423101   | chr2:179,390,717-179,672,150 | AX-96631666  |
| TTN | rs11897386  | chr2:179,390,717-179,672,150 | AX-96554866  |
| TTN | rs11892354  | chr2:179,390,717-179,672,150 | AX-96551553  |
| TTN | rs11892354  | chr2:179,390,717-179,672,150 | AX-96635122  |
| TTN | rs10497523  | chr2:179,390,717-179,672,150 | AX-40777011  |
| TTN | rs111598947 | chr2:179,390,717-179,672,150 | AX-121725293 |
| TTN | rs10184892  | chr2:179,390,717-179,672,150 | AX-12384350  |
| TTN | rs67587484  | chr2:179,390,717-179,672,150 | AX-13768123  |
| TTN | rs72957312  | chr2:179,390,717-179,672,150 | AX-33413607  |
| TTN | rs79491116  | chr2:179,390,717-179,672,150 | AX-13768126  |
| TTN | rs72647851  | chr2:179,390,717-179,672,150 | AX-83456618  |
| TTN | rs16866537  | chr2:179,390,717-179,672,150 | AX-40777015  |
| TTN | ---         | chr2:179,390,717-179,672,150 | AX-94359025  |
| TTN | ---         | chr2:179,390,717-179,672,150 | AX-94359026  |
| TTN | rs146000949 | chr2:179,390,717-179,672,150 | AX-83022209  |
| TTN | rs2291303   | chr2:179,390,717-179,672,150 | AX-50339964  |
| TTN | rs56128843  | chr2:179,390,717-179,672,150 | AX-83051946  |
| TTN | rs16866538  | chr2:179,390,717-179,672,150 | AX-11285041  |
| TTN | rs3754950   | chr2:179,390,717-179,672,150 | AX-12560064  |
| TTN | rs3754949   | chr2:179,390,717-179,672,150 | AX-40777019  |
| TTN | rs73973151  | chr2:179,390,717-179,672,150 | AX-13768135  |
| TTN | rs10497524  | chr2:179,390,717-179,672,150 | AX-40777023  |
| TTN | rs146858785 | chr2:179,390,717-179,672,150 | AX-96549277  |
| TTN | rs146858785 | chr2:179,390,717-179,672,150 | AX-96632846  |
| TTN | rs66733621  | chr2:179,390,717-179,672,150 | AX-33413621  |
| TTN | rs376737897 | chr2:179,390,717-179,672,150 | AX-92812888  |
| TTN | ---         | chr2:179,390,717-179,672,150 | AX-94375777  |
| TTN | rs13420249  | chr2:179,390,717-179,672,150 | AX-40777027  |
| TTN | rs3769862   | chr2:179,390,717-179,672,150 | AX-156281483 |
| TTN | rs3769862   | chr2:179,390,717-179,672,150 | AX-156296424 |
| TTN | rs11321728  | chr2:179,390,717-179,672,150 | AX-122745946 |
| TTN | rs11321728  | chr2:179,390,717-179,672,150 | AX-156273136 |
| TTN | rs35683768  | chr2:179,390,717-179,672,150 | AX-11468190  |
| TTN | rs139517732 | chr2:179,390,717-179,672,150 | AX-86699884  |
| TTN | rs3816849   | chr2:179,390,717-179,672,150 | AX-12562640  |
| TTN | rs3769858   | chr2:179,390,717-179,672,150 | AX-147899821 |
| TTN | rs1872202   | chr2:179,390,717-179,672,150 | AX-40777037  |
| TTN | rs111272780 | chr2:179,390,717-179,672,150 | AX-148606868 |
| TTN | rs111272780 | chr2:179,390,717-179,672,150 | AX-156278755 |
| TTN | rs111692972 | chr2:179,390,717-179,672,150 | AX-148290885 |
| TTN | rs111692972 | chr2:179,390,717-179,672,150 | AX-156278756 |

|     |             |                              |              |
|-----|-------------|------------------------------|--------------|
| TTN | rs60137285  | chr2:179,390,717-179,672,150 | AX-13768148  |
| TTN | rs4894050   | chr2:179,390,717-179,672,150 | AX-40777041  |
| TTN | rs10497525  | chr2:179,390,717-179,672,150 | AX-156273137 |
| TTN | rs10497525  | chr2:179,390,717-179,672,150 | AX-156291072 |
| TTN | rs2279472   | chr2:179,390,717-179,672,150 | AX-40777049  |
| TTN | rs72647838  | chr2:179,390,717-179,672,150 | AX-88773193  |
| TTN | rs72647838  | chr2:179,390,717-179,672,150 | AX-88816238  |
| VCL | rs67672457  | chr10:75,754,951-75,879,914  | AX-29713163  |
| VCL | rs7914216   | chr10:75,754,951-75,879,914  | AX-88733589  |
| VCL | rs147211033 | chr10:75,754,951-75,879,914  | AX-88745847  |
| VCL | rs147211033 | chr10:75,754,951-75,879,914  | AX-88788892  |
| VCL | ---         | chr10:75,754,951-75,879,914  | AX-16394693  |
| VCL | rs111264881 | chr10:75,754,951-75,879,914  | AX-29713167  |
| VCL | rs3812624   | chr10:75,754,951-75,879,914  | AX-92805110  |
| VCL | rs3812625   | chr10:75,754,951-75,879,914  | AX-92802538  |
| VCL | rs3812625   | chr10:75,754,951-75,879,914  | AX-92805126  |
| VCL | rs114200964 | chr10:75,754,951-75,879,914  | AX-29713169  |
| VCL | rs7923778   | chr10:75,754,951-75,879,914  | AX-38877091  |
| VCL | rs7079796   | chr10:75,754,951-75,879,914  | AX-16394697  |
| VCL | rs116822498 | chr10:75,754,951-75,879,914  | AX-156278515 |
| VCL | rs116822498 | chr10:75,754,951-75,879,914  | AX-156294773 |
| VCL | rs35630135  | chr10:75,754,951-75,879,914  | AX-120393341 |
| VCL | rs35630135  | chr10:75,754,951-75,879,914  | AX-156297707 |
| VCL | rs114123848 | chr10:75,754,951-75,879,914  | AX-148896762 |
| VCL | rs114123848 | chr10:75,754,951-75,879,914  | AX-156278516 |
| VCL | rs12357316  | chr10:75,754,951-75,879,914  | AX-11202084  |
| VCL | rs114993631 | chr10:75,754,951-75,879,914  | AX-16394701  |
| VCL | rs12250729  | chr10:75,754,951-75,879,914  | AX-12431594  |
| VCL | rs142835655 | chr10:75,754,951-75,879,914  | AX-148858527 |
| VCL | rs142835655 | chr10:75,754,951-75,879,914  | AX-88326285  |
| VCL | rs12245468  | chr10:75,754,951-75,879,914  | AX-123037750 |
| VCL | rs12245468  | chr10:75,754,951-75,879,914  | AX-156278517 |
| VCL | rs547779787 | chr10:75,754,951-75,879,914  | AX-151453946 |
| VCL | rs547779787 | chr10:75,754,951-75,879,914  | AX-156285717 |
| VCL | rs11815936  | chr10:75,754,951-75,879,914  | AX-120856526 |
| VCL | rs67017494  | chr10:75,754,951-75,879,914  | AX-156294774 |
| VCL | rs11000842  | chr10:75,754,951-75,879,914  | AX-148888642 |
| VCL | rs11000842  | chr10:75,754,951-75,879,914  | AX-156278519 |
| VCL | rs76231488  | chr10:75,754,951-75,879,914  | AX-113098546 |
| VCL | rs76231488  | chr10:75,754,951-75,879,914  | AX-113616728 |
| VCL | rs2395075   | chr10:75,754,951-75,879,914  | AX-16394707  |
| VCL | rs6480714   | chr10:75,754,951-75,879,914  | AX-11567087  |
| VCL | rs200588325 | chr10:75,754,951-75,879,914  | AX-156284261 |
| VCL | rs202191446 | chr10:75,754,951-75,879,914  | AX-156284849 |
| VCL | rs59096058  | chr10:75,754,951-75,879,914  | AX-151168270 |
| VCL | rs184142844 | chr10:75,754,951-75,879,914  | AX-92714853  |
| VCL | rs184142844 | chr10:75,754,951-75,879,914  | AX-92786587  |
| VCL | rs11000845  | chr10:75,754,951-75,879,914  | AX-148896004 |
| VCL | rs11000845  | chr10:75,754,951-75,879,914  | AX-156278520 |
| VCL | rs116843906 | chr10:75,754,951-75,879,914  | AX-29713205  |
| VCL | rs1403629   | chr10:75,754,951-75,879,914  | AX-11260334  |
| VCL | rs7915720   | chr10:75,754,951-75,879,914  | AX-121344740 |
| VCL | rs7915720   | chr10:75,754,951-75,879,914  | AX-123021478 |
| VCL | rs57348795  | chr10:75,754,951-75,879,914  | AX-148820050 |
| VCL | rs57348795  | chr10:75,754,951-75,879,914  | AX-156283619 |

|     |             |                             |              |
|-----|-------------|-----------------------------|--------------|
| VCL | rs12776171  | chr10:75,754,951-75,879,914 | AX-122259502 |
| VCL | rs12776171  | chr10:75,754,951-75,879,914 | AX-148193719 |
| VCL | rs11000847  | chr10:75,754,951-75,879,914 | AX-148110786 |
| VCL | rs11000848  | chr10:75,754,951-75,879,914 | AX-29713215  |
| VCL | rs145980369 | chr10:75,754,951-75,879,914 | AX-156283620 |
| VCL | rs11000849  | chr10:75,754,951-75,879,914 | AX-148325833 |
| VCL | rs11000849  | chr10:75,754,951-75,879,914 | AX-156279433 |
| VCL | ---         | chr10:75,754,951-75,879,914 | AX-86901307  |
| VCL | rs143307823 | chr10:75,754,951-75,879,914 | AX-151227653 |
| VCL | rs143307823 | chr10:75,754,951-75,879,914 | AX-156285205 |
| VCL | rs141891105 | chr10:75,754,951-75,879,914 | AX-120365552 |
| VCL | rs141891105 | chr10:75,754,951-75,879,914 | AX-156284929 |
| VCL | rs11000850  | chr10:75,754,951-75,879,914 | AX-156278521 |
| VCL | rs11000850  | chr10:75,754,951-75,879,914 | AX-156294775 |
| VCL | rs202084961 | chr10:75,754,951-75,879,914 | AX-151386239 |
| VCL | rs10762571  | chr10:75,754,951-75,879,914 | AX-121300198 |
| VCL | rs10762571  | chr10:75,754,951-75,879,914 | AX-156278522 |
| VCL | rs4746166   | chr10:75,754,951-75,879,914 | AX-123046264 |
| VCL | rs4746166   | chr10:75,754,951-75,879,914 | AX-123046265 |
| VCL | rs1965491   | chr10:75,754,951-75,879,914 | AX-121228575 |
| VCL | rs1965491   | chr10:75,754,951-75,879,914 | AX-122995081 |
| VCL | rs7074651   | chr10:75,754,951-75,879,914 | AX-148229363 |
| VCL | rs7074651   | chr10:75,754,951-75,879,914 | AX-148346452 |
| VCL | rs7090820   | chr10:75,754,951-75,879,914 | AX-151234253 |
| VCL | rs7090820   | chr10:75,754,951-75,879,914 | AX-156283621 |
| VCL | rs78398862  | chr10:75,754,951-75,879,914 | AX-156278523 |
| VCL | rs78398862  | chr10:75,754,951-75,879,914 | AX-156294776 |
| VCL | rs10458640  | chr10:75,754,951-75,879,914 | AX-11107690  |
| VCL | ---         | chr10:75,754,951-75,879,914 | AX-11107692  |
| VCL | rs74146309  | chr10:75,754,951-75,879,914 | AX-16394722  |
| VCL | rs11000851  | chr10:75,754,951-75,879,914 | AX-156294777 |
| VCL | rs12570572  | chr10:75,754,951-75,879,914 | AX-29713221  |
| VCL | rs10824054  | chr10:75,754,951-75,879,914 | AX-156278524 |
| VCL | rs7075862   | chr10:75,754,951-75,879,914 | AX-156278525 |
| VCL | rs7075862   | chr10:75,754,951-75,879,914 | AX-156294778 |
| VCL | rs11000852  | chr10:75,754,951-75,879,914 | AX-38877105  |
| VCL | rs11000853  | chr10:75,754,951-75,879,914 | AX-12403724  |
| VCL | rs11000854  | chr10:75,754,951-75,879,914 | AX-11137256  |
| VCL | rs10824055  | chr10:75,754,951-75,879,914 | AX-156278526 |
| VCL | rs10824055  | chr10:75,754,951-75,879,914 | AX-96646574  |
| VCL | rs11000855  | chr10:75,754,951-75,879,914 | AX-156278527 |
| VCL | rs11000855  | chr10:75,754,951-75,879,914 | AX-156294779 |
| VCL | rs7069584   | chr10:75,754,951-75,879,914 | AX-38877111  |
| VCL | rs147299322 | chr10:75,754,951-75,879,914 | AX-151427644 |
| VCL | rs147299322 | chr10:75,754,951-75,879,914 | AX-156283622 |
| VCL | rs11000856  | chr10:75,754,951-75,879,914 | AX-121866380 |
| VCL | rs11000856  | chr10:75,754,951-75,879,914 | AX-148510434 |
| VCL | rs79708660  | chr10:75,754,951-75,879,914 | AX-105099211 |
| VCL | rs79708660  | chr10:75,754,951-75,879,914 | AX-119612410 |
| VCL | rs7914469   | chr10:75,754,951-75,879,914 | AX-123056462 |
| VCL | rs7914469   | chr10:75,754,951-75,879,914 | AX-123056463 |
| VCL | rs11000857  | chr10:75,754,951-75,879,914 | AX-114211625 |
| VCL | rs11000857  | chr10:75,754,951-75,879,914 | AX-147864042 |
| VCL | rs10824058  | chr10:75,754,951-75,879,914 | AX-148147467 |
| VCL | rs10824058  | chr10:75,754,951-75,879,914 | AX-156278528 |

|     |             |                             |              |
|-----|-------------|-----------------------------|--------------|
| VCL | rs182237817 | chr10:75,754,951-75,879,914 | AX-148755192 |
| VCL | rs182237817 | chr10:75,754,951-75,879,914 | AX-156283623 |
| VCL | rs201254748 | chr10:75,754,951-75,879,914 | AX-122990357 |
| VCL | rs201254748 | chr10:75,754,951-75,879,914 | AX-151142760 |
| VCL | rs199882142 | chr10:75,754,951-75,879,914 | AX-148476971 |
| VCL | rs113534623 | chr10:75,754,951-75,879,914 | AX-156269244 |
| VCL | rs113534623 | chr10:75,754,951-75,879,914 | AX-156288761 |
| VCL | rs12413620  | chr10:75,754,951-75,879,914 | AX-11204324  |
| VCL | rs4745730   | chr10:75,754,951-75,879,914 | AX-12580028  |
| VCL | rs7099171   | chr10:75,754,951-75,879,914 | AX-16394728  |
| VCL | rs79424913  | chr10:75,754,951-75,879,914 | AX-16394732  |
| VCL | rs7084014   | chr10:75,754,951-75,879,914 | AX-38877121  |
| VCL | rs55947600  | chr10:75,754,951-75,879,914 | AX-148318063 |
| VCL | rs55947600  | chr10:75,754,951-75,879,914 | AX-156279434 |
| VCL | rs10762573  | chr10:75,754,951-75,879,914 | AX-38877123  |
| VCL | rs12782972  | chr10:75,754,951-75,879,914 | AX-38877125  |
| VCL | rs60297489  | chr10:75,754,951-75,879,914 | AX-16394736  |
| VCL | rs10824060  | chr10:75,754,951-75,879,914 | AX-156278529 |
| VCL | rs80134912  | chr10:75,754,951-75,879,914 | AX-16394737  |
| VCL | rs11594818  | chr10:75,754,951-75,879,914 | AX-156278530 |
| VCL | ---         | chr10:75,754,951-75,879,914 | AX-91996101  |
| VCL | rs149210908 | chr10:75,754,951-75,879,914 | AX-156283624 |
| VCL | rs12240297  | chr10:75,754,951-75,879,914 | AX-156278531 |
| VCL | rs12240297  | chr10:75,754,951-75,879,914 | AX-156294781 |
| VCL | rs12255404  | chr10:75,754,951-75,879,914 | AX-86898130  |
| VCL | rs12255404  | chr10:75,754,951-75,879,914 | AX-86901729  |
| VCL | rs11000859  | chr10:75,754,951-75,879,914 | AX-152093919 |
| VCL | rs61865576  | chr10:75,754,951-75,879,914 | AX-29713261  |
| VCL | rs10762574  | chr10:75,754,951-75,879,914 | AX-123021479 |
| VCL | rs10762574  | chr10:75,754,951-75,879,914 | AX-123021480 |
| VCL | rs11000860  | chr10:75,754,951-75,879,914 | AX-115159686 |
| VCL | rs11000860  | chr10:75,754,951-75,879,914 | AX-156278532 |
| VCL | rs3829127   | chr10:75,754,951-75,879,914 | AX-156278533 |
| VCL | rs3829127   | chr10:75,754,951-75,879,914 | AX-156294782 |
| VCL | rs4414157   | chr10:75,754,951-75,879,914 | AX-16394742  |
| VCL | rs12256764  | chr10:75,754,951-75,879,914 | AX-12431724  |
| VCL | rs11596000  | chr10:75,754,951-75,879,914 | AX-16394744  |
| VCL | rs12258654  | chr10:75,754,951-75,879,914 | AX-156278534 |
| VCL | rs12258654  | chr10:75,754,951-75,879,914 | AX-156294783 |
| VCL | rs146279725 | chr10:75,754,951-75,879,914 | AX-151404701 |
| VCL | rs146279725 | chr10:75,754,951-75,879,914 | AX-156298263 |
| VCL | rs7100021   | chr10:75,754,951-75,879,914 | AX-148139945 |
| VCL | rs7100021   | chr10:75,754,951-75,879,914 | AX-88778377  |
| VCL | rs10762575  | chr10:75,754,951-75,879,914 | AX-12395096  |
| VCL | rs80068231  | chr10:75,754,951-75,879,914 | AX-16394750  |
| VCL | rs200859155 | chr10:75,754,951-75,879,914 | AX-151183511 |
| VCL | rs201293196 | chr10:75,754,951-75,879,914 | AX-122633382 |
| VCL | rs7901068   | chr10:75,754,951-75,879,914 | AX-156278535 |
| VCL | rs7901068   | chr10:75,754,951-75,879,914 | AX-156294784 |
| VCL | rs10824063  | chr10:75,754,951-75,879,914 | AX-123039036 |
| VCL | rs10824063  | chr10:75,754,951-75,879,914 | AX-148168008 |
| VCL | rs56314304  | chr10:75,754,951-75,879,914 | AX-16394752  |
| VCL | rs12266886  | chr10:75,754,951-75,879,914 | AX-38877153  |
| VCL | rs11000861  | chr10:75,754,951-75,879,914 | AX-148312613 |
| VCL | rs11000861  | chr10:75,754,951-75,879,914 | AX-156279435 |



|     |             |                             |              |
|-----|-------------|-----------------------------|--------------|
| VCL | rs11000862  | chr10:75,754,951-75,879,914 | AX-148826571 |
| VCL | rs11000862  | chr10:75,754,951-75,879,914 | AX-156279436 |
| VCL | rs4587673   | chr10:75,754,951-75,879,914 | AX-121062839 |
| VCL | rs4587673   | chr10:75,754,951-75,879,914 | AX-156279437 |
| VCL | rs74496529  | chr10:75,754,951-75,879,914 | AX-16394756  |
| VCL | rs4268450   | chr10:75,754,951-75,879,914 | AX-16394758  |
| VCL | rs11000864  | chr10:75,754,951-75,879,914 | AX-16394759  |
| VCL | rs10824064  | chr10:75,754,951-75,879,914 | AX-148313454 |
| VCL | rs10824064  | chr10:75,754,951-75,879,914 | AX-156278536 |
| VCL | rs150376237 | chr10:75,754,951-75,879,914 | AX-105128765 |
| VCL | rs150376237 | chr10:75,754,951-75,879,914 | AX-148845503 |
| VCL | rs11000865  | chr10:75,754,951-75,879,914 | AX-12403725  |
| VCL | rs11000866  | chr10:75,754,951-75,879,914 | AX-156278537 |
| VCL | rs11000866  | chr10:75,754,951-75,879,914 | AX-156294785 |
| VCL | rs56361489  | chr10:75,754,951-75,879,914 | AX-29713305  |
| VCL | rs10824065  | chr10:75,754,951-75,879,914 | AX-115136012 |
| VCL | rs10824065  | chr10:75,754,951-75,879,914 | AX-156278538 |
| VCL | rs7917915   | chr10:75,754,951-75,879,914 | AX-148623768 |
| VCL | rs7917915   | chr10:75,754,951-75,879,914 | AX-156278539 |
| VCL | rs7921019   | chr10:75,754,951-75,879,914 | AX-151344894 |
| VCL | rs7921019   | chr10:75,754,951-75,879,914 | AX-156278540 |
| VCL | rs7098158   | chr10:75,754,951-75,879,914 | AX-16394764  |
| VCL | rs74146311  | chr10:75,754,951-75,879,914 | AX-16394765  |
| VCL | rs74146312  | chr10:75,754,951-75,879,914 | AX-29713309  |
| VCL | rs60709638  | chr10:75,754,951-75,879,914 | AX-16394767  |
| VCL | rs57273561  | chr10:75,754,951-75,879,914 | AX-16394768  |
| VCL | rs59090270  | chr10:75,754,951-75,879,914 | AX-148621203 |
| VCL | rs59090270  | chr10:75,754,951-75,879,914 | AX-156278541 |
| VCL | rs9663522   | chr10:75,754,951-75,879,914 | AX-156278542 |
| VCL | rs9663522   | chr10:75,754,951-75,879,914 | AX-156294786 |
| VCL | rs111598996 | chr10:75,754,951-75,879,914 | AX-151347620 |
| VCL | rs111598996 | chr10:75,754,951-75,879,914 | AX-156278486 |
| VCL | rs60819773  | chr10:75,754,951-75,879,914 | AX-16394769  |
| VCL | rs57384313  | chr10:75,754,951-75,879,914 | AX-16394770  |
| VCL | rs143197525 | chr10:75,754,951-75,879,914 | AX-96652689  |
| VCL | rs4357629   | chr10:75,754,951-75,879,914 | AX-120383327 |
| VCL | rs7916635   | chr10:75,754,951-75,879,914 | AX-122990359 |
| VCL | rs7916635   | chr10:75,754,951-75,879,914 | AX-122990360 |
| VCL | rs61865578  | chr10:75,754,951-75,879,914 | AX-148331304 |
| VCL | rs112985803 | chr10:75,754,951-75,879,914 | AX-151352707 |
| VCL | rs112985803 | chr10:75,754,951-75,879,914 | AX-156283625 |
| VCL | rs57828435  | chr10:75,754,951-75,879,914 | AX-16394772  |
| VCL | rs201304453 | chr10:75,754,951-75,879,914 | AX-151344704 |
| VCL | rs201304453 | chr10:75,754,951-75,879,914 | AX-156286347 |
| VCL | rs146473758 | chr10:75,754,951-75,879,914 | AX-151342924 |
| VCL | rs146473758 | chr10:75,754,951-75,879,914 | AX-156284244 |
| VCL | rs12253805  | chr10:75,754,951-75,879,914 | AX-38877159  |
| VCL | rs74146313  | chr10:75,754,951-75,879,914 | AX-16394775  |
| VCL | rs200410168 | chr10:75,754,951-75,879,914 | AX-156284454 |
| VCL | rs3012027   | chr10:75,754,951-75,879,914 | AX-148326969 |
| VCL | rs3012027   | chr10:75,754,951-75,879,914 | AX-156278543 |
| VCL | rs3012028   | chr10:75,754,951-75,879,914 | AX-148166739 |
| VCL | rs3012028   | chr10:75,754,951-75,879,914 | AX-156278544 |
| VCL | rs7893217   | chr10:75,754,951-75,879,914 | AX-88789478  |
| VCL | rs7909764   | chr10:75,754,951-75,879,914 | AX-120260764 |

|     |             |                             |              |
|-----|-------------|-----------------------------|--------------|
| VCL | rs7909764   | chr10:75,754,951-75,879,914 | AX-88739502  |
| VCL | rs59511859  | chr10:75,754,951-75,879,914 | AX-16394777  |
| VCL | rs7893758   | chr10:75,754,951-75,879,914 | AX-16394778  |
| VCL | rs7893659   | chr10:75,754,951-75,879,914 | AX-38877163  |
| VCL | rs7894127   | chr10:75,754,951-75,879,914 | AX-38877165  |
| VCL | rs7910622   | chr10:75,754,951-75,879,914 | AX-156278545 |
| VCL | rs7910622   | chr10:75,754,951-75,879,914 | AX-156294787 |
| VCL | rs7910748   | chr10:75,754,951-75,879,914 | AX-148635003 |
| VCL | rs7910748   | chr10:75,754,951-75,879,914 | AX-156278546 |
| VCL | rs56079825  | chr10:75,754,951-75,879,914 | AX-16394780  |
| VCL | rs59698250  | chr10:75,754,951-75,879,914 | AX-16394781  |
| VCL | rs35828059  | chr10:75,754,951-75,879,914 | AX-38877167  |
| VCL | ---         | chr10:75,754,951-75,879,914 | AX-90026460  |
| VCL | rs56314318  | chr10:75,754,951-75,879,914 | AX-16394782  |
| VCL | rs113195070 | chr10:75,754,951-75,879,914 | AX-37482875  |
| VCL | rs2131960   | chr10:75,754,951-75,879,914 | AX-11369321  |
| VCL | rs4745731   | chr10:75,754,951-75,879,914 | AX-156278547 |
| VCL | rs4745731   | chr10:75,754,951-75,879,914 | AX-156294788 |
| VCL | rs74146314  | chr10:75,754,951-75,879,914 | AX-156279438 |
| VCL | rs74146314  | chr10:75,754,951-75,879,914 | AX-156295135 |
| VCL | rs74146315  | chr10:75,754,951-75,879,914 | AX-156279439 |
| VCL | rs74146315  | chr10:75,754,951-75,879,914 | AX-156295136 |
| VCL | rs79479684  | chr10:75,754,951-75,879,914 | AX-151344818 |
| VCL | rs79479684  | chr10:75,754,951-75,879,914 | AX-156278548 |
| VCL | rs71524373  | chr10:75,754,951-75,879,914 | AX-148618519 |
| VCL | rs71524384  | chr10:75,754,951-75,879,914 | AX-156283626 |
| VCL | rs71524384  | chr10:75,754,951-75,879,914 | AX-92538506  |
| VCL | rs111609277 | chr10:75,754,951-75,879,914 | AX-156278549 |
| VCL | rs74146316  | chr10:75,754,951-75,879,914 | AX-16394786  |
| VCL | rs74146317  | chr10:75,754,951-75,879,914 | AX-16394787  |
| VCL | rs144075927 | chr10:75,754,951-75,879,914 | AX-156283627 |
| VCL | rs144075927 | chr10:75,754,951-75,879,914 | AX-94367448  |
| VCL | rs199568482 | chr10:75,754,951-75,879,914 | AX-156286247 |
| VCL | rs76932597  | chr10:75,754,951-75,879,914 | AX-151346899 |
| VCL | rs76932597  | chr10:75,754,951-75,879,914 | AX-156278550 |
| VCL | rs112743588 | chr10:75,754,951-75,879,914 | AX-148618477 |
| VCL | rs112743588 | chr10:75,754,951-75,879,914 | AX-156278551 |
| VCL | rs61584917  | chr10:75,754,951-75,879,914 | AX-156278552 |
| VCL | rs61584917  | chr10:75,754,951-75,879,914 | AX-16476905  |
| VCL | rs58332888  | chr10:75,754,951-75,879,914 | AX-16394788  |
| VCL | rs60563569  | chr10:75,754,951-75,879,914 | AX-156278553 |
| VCL | rs60563569  | chr10:75,754,951-75,879,914 | AX-156294789 |
| VCL | rs58026892  | chr10:75,754,951-75,879,914 | AX-156278554 |
| VCL | rs58026892  | chr10:75,754,951-75,879,914 | AX-156294790 |
| VCL | rs56413529  | chr10:75,754,951-75,879,914 | AX-16394793  |
| VCL | rs4745733   | chr10:75,754,951-75,879,914 | AX-29713353  |
| VCL | rs4745734   | chr10:75,754,951-75,879,914 | AX-156278555 |
| VCL | rs4745734   | chr10:75,754,951-75,879,914 | AX-156294791 |
| VCL | rs4745735   | chr10:75,754,951-75,879,914 | AX-156278556 |
| VCL | rs4745735   | chr10:75,754,951-75,879,914 | AX-156294792 |
| VCL | rs201182836 | chr10:75,754,951-75,879,914 | AX-151343752 |
| VCL | rs201182836 | chr10:75,754,951-75,879,914 | AX-156284681 |
| VCL | rs189064054 | chr10:75,754,951-75,879,914 | AX-156278557 |
| VCL | rs189064054 | chr10:75,754,951-75,879,914 | AX-156294793 |
| VCL | rs4745736   | chr10:75,754,951-75,879,914 | AX-16394794  |

|     |             |                             |              |
|-----|-------------|-----------------------------|--------------|
| VCL | rs4746169   | chr10:75,754,951-75,879,914 | AX-38877175  |
| VCL | rs74146318  | chr10:75,754,951-75,879,914 | AX-156278558 |
| VCL | rs74146318  | chr10:75,754,951-75,879,914 | AX-156294794 |
| VCL | rs1874152   | chr10:75,754,951-75,879,914 | AX-11348904  |
| VCL | rs2934773   | chr10:75,754,951-75,879,914 | AX-38877177  |
| VCL | rs55724951  | chr10:75,754,951-75,879,914 | AX-16394795  |
| VCL | rs112780265 | chr10:75,754,951-75,879,914 | AX-156298509 |
| VCL | rs112780265 | chr10:75,754,951-75,879,914 | AX-16394797  |
| VCL | rs1908337   | chr10:75,754,951-75,879,914 | AX-156278559 |
| VCL | rs74146320  | chr10:75,754,951-75,879,914 | AX-16394799  |
| VCL | rs144857138 | chr10:75,754,951-75,879,914 | AX-156284874 |
| VCL | rs74146321  | chr10:75,754,951-75,879,914 | AX-16394800  |
| VCL | rs55782045  | chr10:75,754,951-75,879,914 | AX-156278560 |
| VCL | rs55782045  | chr10:75,754,951-75,879,914 | AX-156294795 |
| VCL | rs1908338   | chr10:75,754,951-75,879,914 | AX-156278561 |
| VCL | rs1908338   | chr10:75,754,951-75,879,914 | AX-156294796 |
| VCL | rs35830669  | chr10:75,754,951-75,879,914 | AX-121116318 |
| VCL | rs35830669  | chr10:75,754,951-75,879,914 | AX-156278562 |
| VCL | rs74146323  | chr10:75,754,951-75,879,914 | AX-156278563 |
| VCL | rs74146323  | chr10:75,754,951-75,879,914 | AX-156294797 |
| VCL | rs145629058 | chr10:75,754,951-75,879,914 | AX-156297998 |
| VCL | rs145629058 | chr10:75,754,951-75,879,914 | AX-16394804  |
| VCL | rs80127811  | chr10:75,754,951-75,879,914 | AX-16394806  |
| VCL | rs2131961   | chr10:75,754,951-75,879,914 | AX-38877183  |
| VCL | rs11000868  | chr10:75,754,951-75,879,914 | AX-11137257  |
| VCL | rs60612652  | chr10:75,754,951-75,879,914 | AX-16394807  |
| VCL | rs2270548   | chr10:75,754,951-75,879,914 | AX-11380079  |
| VCL | rs71579353  | chr10:75,754,951-75,879,914 | AX-83465722  |
| VCL | rs5786133   | chr10:75,754,951-75,879,914 | AX-151144919 |
| VCL | rs1908339   | chr10:75,754,951-75,879,914 | AX-38877187  |
| VCL | rs61731180  | chr10:75,754,951-75,879,914 | AX-16394809  |
| VCL | ---         | chr10:75,754,951-75,879,914 | AX-88320415  |
| VCL | rs7076458   | chr10:75,754,951-75,879,914 | AX-114075802 |
| VCL | rs7076458   | chr10:75,754,951-75,879,914 | AX-156278564 |
| VCL | rs4746170   | chr10:75,754,951-75,879,914 | AX-151181862 |
| VCL | rs11599181  | chr10:75,754,951-75,879,914 | AX-148428651 |
| VCL | rs4745737   | chr10:75,754,951-75,879,914 | AX-148632449 |
| VCL | rs4745737   | chr10:75,754,951-75,879,914 | AX-156269246 |
| VCL | rs12571772  | chr10:75,754,951-75,879,914 | AX-151240545 |
| VCL | rs12571772  | chr10:75,754,951-75,879,914 | AX-156283628 |
| VCL | rs186352082 | chr10:75,754,951-75,879,914 | AX-151300472 |
| VCL | rs191660137 | chr10:75,754,951-75,879,914 | AX-149885061 |
| VCL | rs191660137 | chr10:75,754,951-75,879,914 | AX-92758910  |
| VCL | rs12772220  | chr10:75,754,951-75,879,914 | AX-148101608 |
| VCL | rs12772220  | chr10:75,754,951-75,879,914 | AX-152037317 |
| VCL | rs11596526  | chr10:75,754,951-75,879,914 | AX-50025143  |
| VCL | rs11000869  | chr10:75,754,951-75,879,914 | AX-92802523  |
| VCL | rs76974852  | chr10:75,754,951-75,879,914 | AX-29713371  |
| VCL | rs7083479   | chr10:75,754,951-75,879,914 | AX-38877193  |
| VCL | rs7908476   | chr10:75,754,951-75,879,914 | AX-16394817  |
| VCL | ---         | chr10:75,754,951-75,879,914 | AX-12600217  |
| VCL | ---         | chr10:75,754,951-75,879,914 | AX-94360564  |
| VCL | rs7073889   | chr10:75,754,951-75,879,914 | AX-38877195  |
| VCL | rs10652052  | chr10:75,754,951-75,879,914 | AX-151332521 |
| VCL | rs10652052  | chr10:75,754,951-75,879,914 | AX-156298363 |

|     |             |                             |              |
|-----|-------------|-----------------------------|--------------|
| VCL | rs146278697 | chr10:75,754,951-75,879,914 | AX-82890782  |
| VCL | rs374522164 | chr10:75,754,951-75,879,914 | AX-86739828  |
| VCL | rs12258268  | chr10:75,754,951-75,879,914 | AX-122783342 |
| VCL | rs12258268  | chr10:75,754,951-75,879,914 | AX-149505377 |
| VCL | rs111748583 | chr10:75,754,951-75,879,914 | AX-16394823  |
| VCL | rs138676040 | chr10:75,754,951-75,879,914 | AX-156285974 |
| VCL | rs113750112 | chr10:75,754,951-75,879,914 | AX-148395674 |
| VCL | rs113750112 | chr10:75,754,951-75,879,914 | AX-156283629 |
| VCL | rs113584681 | chr10:75,754,951-75,879,914 | AX-105108221 |
| VCL | rs113584681 | chr10:75,754,951-75,879,914 | AX-156283630 |
| VCL | rs16931166  | chr10:75,754,951-75,879,914 | AX-38877199  |
| VCL | rs143750279 | chr10:75,754,951-75,879,914 | AX-148652385 |
| VCL | rs147134358 | chr10:75,754,951-75,879,914 | AX-106835873 |
| VCL | rs147134358 | chr10:75,754,951-75,879,914 | AX-120676748 |
| VCL | rs11000870  | chr10:75,754,951-75,879,914 | AX-148389880 |
| VCL | rs11000870  | chr10:75,754,951-75,879,914 | AX-156278565 |
| VCL | rs75684366  | chr10:75,754,951-75,879,914 | AX-16394826  |
| VCL | rs74146324  | chr10:75,754,951-75,879,914 | AX-156278566 |
| VCL | rs10824069  | chr10:75,754,951-75,879,914 | AX-16394827  |
| VCL | rs2229507   | chr10:75,754,951-75,879,914 | AX-121213938 |
| VCL | rs2229507   | chr10:75,754,951-75,879,914 | AX-156265699 |
| VCL | rs2228373   | chr10:75,754,951-75,879,914 | AX-16394828  |
| VCL | rs141033098 | chr10:75,754,951-75,879,914 | AX-83308422  |
| VCL | rs4746172   | chr10:75,754,951-75,879,914 | AX-12580040  |
| VCL | ---         | chr10:75,754,951-75,879,914 | AX-156285609 |
| VCL | rs12243178  | chr10:75,754,951-75,879,914 | AX-16394835  |
| VCL | rs74146325  | chr10:75,754,951-75,879,914 | AX-16394836  |
| VCL | rs60384973  | chr10:75,754,951-75,879,914 | AX-16394838  |
| VCL | rs140966874 | chr10:75,754,951-75,879,914 | AX-151272182 |
| VCL | rs140966874 | chr10:75,754,951-75,879,914 | AX-156298042 |
| VCL | rs79993375  | chr10:75,754,951-75,879,914 | AX-29713399  |
| VCL | rs74146326  | chr10:75,754,951-75,879,914 | AX-16394839  |
| VCL | rs17743339  | chr10:75,754,951-75,879,914 | AX-38877207  |
| VCL | rs71579374  | chr10:75,754,951-75,879,914 | AX-83492773  |
| VCL | rs199610574 | chr10:75,754,951-75,879,914 | AX-151425244 |
| VCL | rs199610574 | chr10:75,754,951-75,879,914 | AX-156284383 |
| VCL | rs11000872  | chr10:75,754,951-75,879,914 | AX-92647212  |
| VCL | rs11000872  | chr10:75,754,951-75,879,914 | AX-92670978  |
| VCL | rs7912297   | chr10:75,754,951-75,879,914 | AX-123021481 |
| VCL | rs7912297   | chr10:75,754,951-75,879,914 | AX-123021482 |
| VCL | rs10709887  | chr10:75,754,951-75,879,914 | AX-122464424 |
| VCL | rs2270552   | chr10:75,754,951-75,879,914 | AX-11380080  |
| VCL | rs2131959   | chr10:75,754,951-75,879,914 | AX-38877215  |
| VCL | rs11000874  | chr10:75,754,951-75,879,914 | AX-38877217  |
| VCL | rs767809    | chr10:75,754,951-75,879,914 | AX-16394843  |
| VCL | rs57050827  | chr10:75,754,951-75,879,914 | AX-16394844  |
| VCL | rs2131957   | chr10:75,754,951-75,879,914 | AX-16394845  |
| VCL | rs2279648   | chr10:75,754,951-75,879,914 | AX-16394846  |
| VCL | rs1874151   | chr10:75,754,951-75,879,914 | AX-29713417  |
| VCL | rs1874150   | chr10:75,754,951-75,879,914 | AX-16394848  |
| VCL | rs3793921   | chr10:75,754,951-75,879,914 | AX-16394849  |
| VCL | rs2270551   | chr10:75,754,951-75,879,914 | AX-16394852  |
| VCL | rs10824070  | chr10:75,754,951-75,879,914 | AX-16394853  |
| VCL | rs7909664   | chr10:75,754,951-75,879,914 | AX-38877219  |
| VCL | rs12415418  | chr10:75,754,951-75,879,914 | AX-16394855  |

|     |             |                             |              |
|-----|-------------|-----------------------------|--------------|
| VCL | rs16931177  | chr10:75,754,951-75,879,914 | AX-38877223  |
| VCL | rs2131956   | chr10:75,754,951-75,879,914 | AX-16394859  |
| VCL | rs34885185  | chr10:75,754,951-75,879,914 | AX-38877227  |
| VCL | rs10824071  | chr10:75,754,951-75,879,914 | AX-12397512  |
| VCL | rs10824072  | chr10:75,754,951-75,879,914 | AX-156265666 |
| VCL | rs10824072  | chr10:75,754,951-75,879,914 | AX-156265700 |
| VCL | rs397517238 | chr10:75,754,951-75,879,914 | AX-91983660  |
| VCL | rs10824073  | chr10:75,754,951-75,879,914 | AX-16394862  |
| VCL | rs6480716   | chr10:75,754,951-75,879,914 | AX-16394863  |
| VCL | rs7922894   | chr10:75,754,951-75,879,914 | AX-16394864  |
| VCL | rs7100462   | chr10:75,754,951-75,879,914 | AX-156278567 |
| VCL | rs34188235  | chr10:75,754,951-75,879,914 | AX-156284272 |
| VCL | rs10824074  | chr10:75,754,951-75,879,914 | AX-119407738 |
| VCL | rs10824074  | chr10:75,754,951-75,879,914 | AX-120523075 |
| VCL | rs12572820  | chr10:75,754,951-75,879,914 | AX-151151193 |
| VCL | rs11597732  | chr10:75,754,951-75,879,914 | AX-151143950 |
| VCL | rs11597732  | chr10:75,754,951-75,879,914 | AX-156278569 |
| VCL | rs373317423 | chr10:75,754,951-75,879,914 | AX-86648418  |
| VCL | rs16408     | chr10:75,754,951-75,879,914 | AX-121237760 |
| VCL | rs16408     | chr10:75,754,951-75,879,914 | AX-84963749  |
| VCL | rs703258    | chr10:75,754,951-75,879,914 | AX-38877241  |
| VCL | rs8255      | chr10:75,754,951-75,879,914 | AX-51242354  |
| VCL | rs8255      | chr10:75,754,951-75,879,914 | AX-84931175  |
| VCL | rs201189785 | chr10:75,754,951-75,879,914 | AX-156298659 |
| VCL | rs201189785 | chr10:75,754,951-75,879,914 | AX-84925963  |
